# Supplementary material for: Characterization of Transcriptome Dynamics during Early Fruit Development in Olive (Olea europaea L.)
Source: Int J Mol Sci. 2023 Jan 4;24(2):961. doi: 10.3390/ijms24020961 (PMC9864153; doi:10.3390/ijms24020961)
Supplement: Supplementary file 1 [file ijms-24-00961-s001.zip]

Archive with 15 entries (15 files):
- ijms-2085432-supplementary.pdf
- Table S10_P14_vs_P0_DOWN_Functional_Enrichment.xlsx
- Table S11_P28_VS_P14_UP_Functional_Enrichment.xlsx
- Table S12_P28_VS_P14_DOWN_Functional_Enrichment.xlsx
- Table S13_.xlsx
- Table S14_.xlsx
- Table S15_PEP_sub.xlsx
- Table S16_protesases.xlsx
- Table S17_CELL WALL.xlsx
- Table S18_def.xlsx
- Table S19_def.xlsx
- Table S2-S5.xlsx
- TABLE S6-S7.xls
- Table S8.xlsx
- Table S9_P14_vs_P0_UP_Functional_Enrichment.xlsx
