# Supplementary material for: Characterization of Transcriptome Dynamics during Early Fruit Development in Olive (Olea europaea L.)
Source: Int J Mol Sci. 2023 Jan 4;24(2):961. doi: 10.3390/ijms24020961 (PMC9864153; doi:10.3390/ijms24020961)
Supplement: Supplementary file 1 [file ijms-24-00961-s001.zip › Table S2-S5.xlsx]

## Sheet: Table S2_
Supplementary Table S2. Genes up-regulated during early fruit development in the first comparison (P14 vs. P0)
Genes	baseMean	log2FoldChange	FoldChange	lfcSE	stat	pvalue	padj	Gene_ID	description	Organism	pfam	Interpro
LOC111365228	229.013	2.70278	6.51053	0.228937	11.8058	3.65e-32	5.23e-31	XP_022841409.1	stomatal_closure-related_actin-binding_protein_2-like	Olive	PF16711:Actin-binding_domain_of_plant-specific_actin-binding_protein//PF17684:PH_domain_of_plant-specific_actin-binding_protein//PF16709:Ig_domain_of_plant-specific_actin-binding_protein//PF16712:Coiled-coil_regions_of_plant-specific_actin-binding_protein	IPR035921:F/V-ATP synthase subunit C superfamily//IPR011555:V-ATPase proteolipid subunit C, eukaryotic//IPR000245:V-ATPase proteolipid subunit
LOC111365234	343.405	0.511197	1.42523	0.159469	3.20561	0.00134777	0.0030963	XP_022841417.1	transcription_termination/antitermination_protein_NusG	Olive	PF02357:Transcription_termination_factor_nusG	IPR000222:PPM-type phosphatase, divalent cation binding//IPR036457:PPM-type phosphatase domain superfamily//IPR001932:PPM-type phosphatase domain
LOC111365240	282.353	1.34852	2.54651	0.21018	6.41602	1.4e-10	6.98e-10	XP_022841426.1	transcription_factor_DIVARICATA-like,_transcript_variant_X2	Olive	PF00249:Myb-like_DNA-binding_domain	IPR002100:Transcription factor, MADS-box//IPR033896:MADS MEF2-like//IPR002487:Transcription factor, K-box//IPR036879:Transcription factor, MADS-box superfamily
LOC111365246	2604.05	1.21955	2.32875	0.118666	10.2772	8.93e-25	9.6e-24	XP_022841432.1	chlorophyll_a-b_binding_protein_CP29.1,_chloroplastic	Olive	PF00504:Chlorophyll_A-B_binding_protein	IPR001969:Aspartic peptidase, active site//IPR033121:Peptidase family A1 domain//IPR021109:Aspartic peptidase domain superfamily//IPR001461:Aspartic peptidase A1 family
LOC111365258	242.074	2.16957	4.49888	0.653486	3.31999	0.000900203	0.00213007	XP_022841468.1	probable_small_nuclear_ribonucleoprotein_F	Olive	PF01423:LSM_domain
LOC111365266	171.014	0.849312	1.80164	0.238511	3.56089	0.000369599	0.000926989	XP_022841476.1	probable_pectate_lyase_5	Olive	PF00544:Pectate_lyase
LOC111365271	214.255	0.756341	1.6892	0.210338	3.59584	0.00032335	0.000818932	XP_022841481.1	amino_acid_transporter_AVT1C-like	Olive	PF01490:Transmembrane_amino_acid_transporter_protein	IPR000048:IQ motif, EF-hand binding site
LOC111365272	574.29	4.27818	19.4027	0.215109	19.8884	5.13e-88	2.61e-86	XP_022841482.1	thaumatin-like_protein	Olive	PF00314:Thaumatin_family
LOC111365273	73.4016	2.48204	5.58688	0.36598	6.78191	1.19e-11	6.4e-11	XP_022841484.1	WUSCHEL-related_homeobox_1-like,_transcript_variant_X2	Olive	PF00046:Homeodomain	IPR036883:PDCD5-like superfamily//IPR002836:PDCD5-like
LOC111365275	579.143	0.763143	1.69718	0.132808	5.74621	9.13e-09	3.93e-08	XP_022841487.1	auxin_efflux_carrier_component_1-like,_transcript_variant_X2	Olive	PF03547:Membrane_transport_protein	IPR000823:Plant peroxidase//IPR010255:Haem peroxidase superfamily//IPR002016:Haem peroxidase//IPR033905:Secretory peroxidase
LOC111365277	101.694	0.751972	1.68409	0.266925	2.81717	0.00484487	0.0101122	XP_022841491.1	thylakoid_lumenal_15.0_kDa_protein_2,_chloroplastic	Olive		IPR037165:Aldehyde oxidase/xanthine dehydrogenase, molybdopterin binding domain superfamily//IPR036010:2Fe-2S ferredoxin-like superfamily//IPR001041:2Fe-2S ferredoxin-type iron-sulfur binding domain//IPR036318:FAD-binding, type PCMH-like superfamily//IPR005107:CO dehydrogenase flavoprotein, C-terminal//IPR036683:CO dehydrogenase flavoprotein, C-terminal domain superfamily//IPR000674:Aldehyde oxid…
LOC111365280	516.42	0.470324	1.38542	0.166128	2.83109	0.00463891	0.00971004	XP_022841492.1	protein_TIFY_6B-like,_transcript_variant_X2	Olive	PF06200:tify_domain//PF09425:Divergent_CCT_motif	IPR002347:Short-chain dehydrogenase/reductase SDR//IPR036291:NAD(P)-binding domain superfamily
LOC111365282	855.924	1.74139	3.34357	0.133365	13.0573	5.77e-39	1.02e-37	XP_022841496.1	probable_inactive_receptor_kinase_At1g48480	Olive	PF08263:Leucine_rich_repeat_N-terminal_domain//PF13855:Leucine_rich_repeat//PF00069:Protein_kinase_domain
LOC111365285	186.555	0.662172	1.58246	0.228163	2.90219	0.00370562	0.00788759	XP_022841501.1	transcription_initiation_factor_TFIID_subunit_8-like	Olive	PF07524:Bromodomain_associated//PF10406:Transcription_factor_TFIID_complex_subunit_8_C-term	IPR000668:Peptidase C1A, papain C-terminal//IPR039417:Papain-like cysteine endopeptidase//IPR025661:Cysteine peptidase, asparagine active site//IPR025660:Cysteine peptidase, histidine active site//IPR000169:Cysteine peptidase, cysteine active site//IPR037277:Granulin superfamily//IPR013201:Cathepsin propeptide inhibitor domain (I29)//IPR000118:Granulin//IPR038765:Papain-like cysteine peptidase su…
LOC111365297	1458.3	1.01418	2.01975	0.163791	6.19192	5.94e-10	2.83e-09	XP_022841510.1	cinnamoyl-CoA_reductase_1-like	Olive	PF01370:NAD_dependent_epimerase/dehydratase_family
LOC111365298	98.2966	1.13177	2.19128	0.291206	3.88651	0.000101696	0.000277136		uncharacterized_LOC111365298	Olive
LOC111365303	121.022	0.552667	1.4668	0.244141	2.26372	0.0235914	0.042624	XP_022841554.1	OTU_domain-containing_protein_1-like,_transcript_variant_X6	Olive	PF02338:OTU-like_cysteine_protease
LOC111365309	125.505	1.65604	3.1515	0.257874	6.4219	1.35e-10	6.72e-10		uncharacterized_LOC111365309	Olive
LOC111365316	77.2239	1.22989	2.34548	0.308886	3.98168	6.84e-05	0.000191158	XP_022841531.1	ammonium_transporter_3_member_2-like	Olive	PF00909:Ammonium_Transporter_Family
LOC111365318	134.301	2.18998	4.56298	0.27568	7.94391	1.96e-15	1.34e-14	XP_022841535.1	isoeugenol_synthase_1-like,_transcript_variant_X2	Olive	PF05368:NmrA-like_family	IPR002528:Multi antimicrobial extrusion protein
LOC111365319	159.231	1.67403	3.19104	0.257229	6.50791	7.62e-11	3.88e-10	XP_022841536.1	transcription_termination_factor_MTERF6,_chloroplastic/mitochondrial	Olive	PF02536:mTERF	IPR013783:Immunoglobulin-like fold//IPR000535:Major sperm protein (MSP) domain//IPR008962:PapD-like superfamily
LOC111365320	723.026	2.36669	5.15758	0.150182	15.7588	5.97e-56	1.67e-54	XP_022841537.1	patellin-3-like	Olive	PF00650:CRAL/TRIO_domain//PF03765:CRAL/TRIO,_N-terminal_domain
LOC111365321	344.478	0.492569	1.40695	0.162865	3.0244	0.00249124	0.00546671			Olive		IPR016021:MIF4G-like domain superfamily//IPR003891:Initiation factor eIF-4 gamma, MA3//IPR003890:MIF4G-like, type 3//IPR016024:Armadillo-type fold
LOC111365322	911.166	1.73471	3.32812	0.133641	12.9804	1.58e-38	2.74e-37		uncharacterized_LOC111365322,_transcript_variant_X4	Olive		IPR001471:AP2/ERF domain//IPR016177:DNA-binding domain superfamily//IPR036955:AP2/ERF domain superfamily
LOC111365328	925.037	1.96251	3.89741	0.152829	12.8412	9.63e-38	1.63e-36	XP_022841553.1	putative_late_blight_resistance_protein_homolog_R1A-3,_transcript_variant_X2	Olive	PF00931:NB-ARC_domain	IPR003656:Zinc finger, BED-type//IPR036236:Zinc finger C2H2 superfamily
LOC111365329	646.369	2.57211	5.94679	0.171141	15.0292	4.73e-51	1.17e-49	XP_022841559.1	putative_late_blight_resistance_protein_homolog_R1A-3,_transcript_variant_X5	Olive	PF00931:NB-ARC_domain	IPR021109:Aspartic peptidase domain superfamily//IPR001584:Integrase, catalytic core//IPR043128:Reverse transcriptase/Diguanylate cyclase domain//IPR012337:Ribonuclease H-like superfamily//IPR043502:DNA/RNA polymerase superfamily//IPR000953:Chromo/chromo shadow domain//IPR016197:Chromo-like domain superfamily//IPR036397:Ribonuclease H superfamily
LOC111365331	264.401	1.63809	3.11254	0.187153	8.75268	2.08e-18	1.67e-17	XP_022841563.1	putative_late_blight_resistance_protein_homolog_R1B-14,_transcript_variant_X4	Olive	PF00931:NB-ARC_domain	IPR008271:Serine/threonine-protein kinase, active site//IPR011009:Protein kinase-like domain superfamily//IPR000719:Protein kinase domain
LOC111365332	1011.29	0.842713	1.79342	0.117462	7.17437	7.26e-13	4.24e-12	XP_022841564.1	putative_late_blight_resistance_protein_homolog_R1A-10	Olive	PF00931:NB-ARC_domain
LOC111365340	186.243	0.548322	1.46238	0.203941	2.68863	0.00717455	0.0145074	XP_022841599.1	probable_serine/threonine-protein_kinase_PBL19,_transcript_variant_X3	Olive	PF00069:Protein_kinase_domain//PF07714:Protein_tyrosine_kinase	IPR016135:Ubiquitin-conjugating enzyme/RWD-like//IPR000608:Ubiquitin-conjugating enzyme E2
LOC111365342	483.244	0.82695	1.77393	0.266816	3.09933	0.00193962	0.00433689	XP_022841586.1	uncharacterized_LOC111365342,_transcript_variant_X5	Olive		IPR011047:Quinoprotein alcohol dehydrogenase-like superfamily//IPR019775:WD40 repeat, conserved site//IPR017986:WD40-repeat-containing domain//IPR015943:WD40/YVTN repeat-like-containing domain superfamily//IPR001680:WD40 repeat
LOC111365343	1362.24	0.370673	1.29296	0.165444	2.24047	0.0250607	0.0450103	XP_022841587.1	cytochrome_P450_89A2-like	Olive	PF00067:Cytochrome_P450
LOC111365350	326.929	0.700503	1.62507	0.180512	3.88063	0.000104184	0.000283343	XP_022841600.1	transcription_factor_TCP7-like	Olive	PF03634:TCP_family_transcription_factor	IPR018783:Transcription factor, enhancer of yellow 2//IPR038212:Transcription factor EnY2 superfamily
LOC111365352	78.8333	1.75597	3.37753	0.332341	5.28364	1.27e-07	4.88e-07	XP_022841605.1	uncharacterized_lipoprotein_syc1174_c-like,_transcript_variant_X3	Olive	PF11805:Protein_of_unknown_function_(DUF3326)
LOC111365364	568.153	0.306874	1.23702	0.13422	2.28636	0.0222334	0.0404682		uncharacterized_LOC111365364,_transcript_variant_X2	Olive
LOC111365367	302.882	0.618377	1.53515	0.179742	3.44037	0.000580928	0.00141451	XP_022841623.1	putative_late_blight_resistance_protein_homolog_R1A-3,_transcript_variant_X2	Olive	PF18052:Rx_N-terminal_domain//PF00931:NB-ARC_domain	IPR018189:Phosphoglucose isomerase, conserved site//IPR035482:Phosphoglucose isomerase, SIS domain 2//IPR001672:Phosphoglucose isomerase (PGI)//IPR023096:Phosphoglucose isomerase, C-terminal
LOC111365371	205.603	0.63457	1.55248	0.252925	2.50893	0.0121098	0.0233979		uncharacterized_LOC111365371	Olive		IPR001680:WD40 repeat//IPR006594:LIS1 homology motif//IPR020472:G-protein beta WD-40 repeat//IPR015943:WD40/YVTN repeat-like-containing domain superfamily//IPR036322:WD40-repeat-containing domain superfamily//IPR019775:WD40 repeat, conserved site//IPR017986:WD40-repeat-containing domain
LOC111365373	783.75	0.704365	1.62943	0.153681	4.5833	4.58e-06	1.48e-05	XP_022841652.1	translin,_transcript_variant_X3	Olive	PF01997:Translin_family
LOC111365376	3983.72	0.261369	1.19862	0.11497	2.27337	0.0230039	0.0416813	XP_022841638.1	putative_late_blight_resistance_protein_homolog_R1B-17,_transcript_variant_X2	Olive	PF18052:Rx_N-terminal_domain//PF00931:NB-ARC_domain	IPR036249:Thioredoxin-like superfamily//IPR013766:Thioredoxin domain//IPR017937:Thioredoxin, conserved site//IPR005746:Thioredoxin
LOC111365390	1461.02	1.70936	3.27017	0.119051	14.3582	9.47e-47	2.11e-45	XP_022841715.1	uncharacterized_LOC111365390,_transcript_variant_X7	Olive	PF00249:Myb-like_DNA-binding_domain	IPR003855:Potassium transporter
LOC111365392	1759.49	0.360998	1.28431	0.120025	3.0077	0.0026323	0.00575335	XP_022841662.1	nucleolin-like	Olive	PF00076:RNA_recognition_motif._(a.k.a._RRM,_RBD,_or_RNP_domain)
LOC111365393	203.673	1.16908	2.24868	0.253335	4.61475	3.94e-06	1.29e-05	XP_022841663.1	phospholipase_A1-IIdelta-like	Olive	PF01764:Lipase_(class_3)
LOC111365399	179.492	1.96873	3.91424	0.253709	7.7598	8.51e-15	5.62e-14	XP_022841676.1	probable_leucine-rich_repeat_receptor-like_protein_kinase_At5g49770,_transcript_variant_X6	Olive	PF07714:Protein_tyrosine_kinase	IPR027417:P-loop containing nucleoside triphosphate hydrolase//IPR038005:Virus X resistance protein-like, coiled-coil domain//IPR032675:Leucine-rich repeat domain superfamily
LOC111365405	278.585	0.738321	1.66823	0.175691	4.20238	2.64e-05	7.78e-05	XP_022841696.1	uncharacterized_protein_At2g33490-like,_transcript_variant_X2	Olive
LOC111365406	684.503	1.52058	2.86907	0.152071	9.99915	1.54e-23	1.57e-22	XP_022841697.1	probable_protein_S-acyltransferase_7	Olive	PF01529:DHHC_palmitoyltransferase	IPR006476:Conserved hypothetical protein CHP01589, plant
LOC111365408	2684.64	0.849433	1.80179	0.240438	3.53285	0.000411101	0.00102352	XP_022841699.1	60S_ribosomal_protein_L7a-1-like	Olive	PF01248:Ribosomal_protein_L7Ae/L30e/S12e/Gadd45_family
LOC111365416	310.265	1.24783	2.37485	0.327037	3.81558	0.000135864	0.000363296	XP_022841709.1	uncharacterized_LOC111365416	Olive
LOC111365417	1405.86	0.670391	1.5915	0.176766	3.79254	0.000149116	0.000396435	XP_022841711.1	B2_protein-like,_transcript_variant_X2	Olive	PF10539:Development_and_cell_death_domain	IPR023214:HAD superfamily//IPR004274:FCP1 homology domain//IPR036412:HAD-like superfamily//IPR011948:Dullard phosphatase domain, eukaryotic
LOC111365419	1737.85	0.274071	1.20921	0.116943	2.34362	0.0190978	0.0352899	XP_022841713.1	SWI/SNF_complex_component_SNF12_homolog	Olive	PF02201:SWIB/MDM2_domain
LOC111365425	208.871	1.43922	2.71174	0.257799	5.58273	2.37e-08	9.81e-08	XP_022841724.1	50S_ribosomal_protein_L13-like	Olive	PF00572:Ribosomal_protein_L13	IPR023626:Ribosomal protein L39e domain superfamily//IPR020083:Ribosomal protein L39e, conserved site//IPR000077:Ribosomal protein L39e
LOC111365426	1581.28	1.14012	2.20399	0.448131	2.54416	0.0109541	0.0213448	XP_022841737.1	adenosine_kinase_2-like,_transcript_variant_X2	Olive	PF00294:pfkB_family_carbohydrate_kinase	IPR005225:Small GTP-binding protein domain//IPR027417:P-loop containing nucleoside triphosphate hydrolase//IPR006689:Small GTPase superfamily, ARF/SAR type
LOC111365432	441.599	0.925866	1.89982	0.183509	5.04535	4.53e-07	1.65e-06	XP_022841741.1	EID1-like_F-box_protein_2,_transcript_variant_X5	Olive		IPR009091:Regulator of chromosome condensation 1/beta-lactamase-inhibitor protein II//IPR000408:Regulator of chromosome condensation, RCC1
LOC111365441	652.627	1.02107	2.02942	0.167057	6.11208	9.83e-10	4.6e-09	XP_022841752.1	DEAD-box_ATP-dependent_RNA_helicase_16	Olive	PF00271:Helicase_conserved_C-terminal_domain//PF00270:DEAD/DEAH_box_helicase	IPR036393:Acetylglutamate kinase-like superfamily//IPR024192:Fosfomycin resistance kinase, FomA-type
LOC111365442	353.483	1.00649	2.00902	0.162726	6.18521	6.2e-10	2.94e-09	XP_022841753.1	growth-regulating_factor_1-like	Olive	PF08880:QLQ//PF08879:WRC
LOC111365447	209.116	1.16235	2.23821	0.219764	5.28907	1.23e-07	4.74e-07	XP_022841762.1	acid_beta-fructofuranosidase-like	Olive	PF00251:Glycosyl_hydrolases_family_32_N-terminal_domain//PF11837:Domain_of_unknown_function_(DUF3357)//PF08244:Glycosyl_hydrolases_family_32_C_terminal
LOC111365448	52.5358	2.22853	4.68655	0.471323	4.72823	2.26e-06	7.64e-06	XP_022841763.1	putative_late_blight_resistance_protein_homolog_R1A-10	Olive	PF00931:NB-ARC_domain//PF18052:Rx_N-terminal_domain
LOC111365450	178.161	1.94589	3.85274	0.240704	8.08413	6.26e-16	4.42e-15	XP_022841766.1	scarecrow-like_protein_4	Olive	PF03514:GRAS_domain_family	IPR009071:High mobility group box domain//IPR036431:ARID DNA-binding domain superfamily//IPR036910:High mobility group box domain superfamily//IPR001606:ARID DNA-binding domain
LOC111365454	178.571	1.71684	3.28715	0.234811	7.31158	2.64e-13	1.59e-12	XP_022841770.1	zinc-finger_homeodomain_protein_7-like	Olive	PF04770:ZF-HD_protein_dimerisation_region	IPR001841:Zinc finger, RING-type//IPR013083:Zinc finger, RING/FYVE/PHD-type
LOC111365457	803.109	0.739831	1.66998	0.135464	5.46146	4.72e-08	1.9e-07	XP_022841777.1	NAC_domain-containing_protein_82-like,_transcript_variant_X5	Olive	PF02365:No_apical_meristem_(NAM)_protein	IPR005491:ENT domain//IPR036142:ENT domain-like superfamily
LOC111365461	2810.18	0.892326	1.85617	0.131196	6.80146	1.04e-11	5.61e-11	XP_022841782.1	putative_late_blight_resistance_protein_homolog_R1A-10,_transcript_variant_X2	Olive	PF00931:NB-ARC_domain//PF18052:Rx_N-terminal_domain	IPR032675:Leucine-rich repeat domain superfamily
LOC111365463	255.558	0.877843	1.83763	0.179375	4.8939	9.89e-07	3.47e-06		uncharacterized_LOC111365463,_transcript_variant_X2	Olive
LOC111365465	1479.3	1.44592	2.72437	0.149159	9.69383	3.2e-22	3.09e-21	XP_022841784.1	putative_late_blight_resistance_protein_homolog_R1A-10	Olive	PF00931:NB-ARC_domain//PF18052:Rx_N-terminal_domain	IPR017930:Myb domain//IPR006447:Myb domain, plants//IPR009057:Homeobox-like domain superfamily
LOC111365466	264.279	1.274	2.41831	0.215237	5.91908	3.24e-09	1.45e-08			Olive		IPR005607:BSD domain
LOC111365469	345.824	0.514009	1.42801	0.199236	2.5799	0.009883	0.0194462	XP_022841787.1	uncharacterized_LOC111365469	Olive
LOC111365471	1416.42	0.986218	1.98099	0.192629	5.11977	3.06e-07	1.13e-06	XP_022841789.1	basic_transcription_factor_3-like	Olive	PF01849:NAC_domain	IPR009060:UBA-like superfamily//IPR036353:XPC-binding domain superfamily//IPR004806:UV excision repair protein Rad23//IPR015940:Ubiquitin-associated domain//IPR029071:Ubiquitin-like domain superfamily//IPR006636:Heat shock chaperonin-binding//IPR000626:Ubiquitin-like domain
LOC111365477	201.245	1.5426	2.91319	0.213403	7.22858	4.88e-13	2.89e-12	XP_022841795.1	NAC_domain-containing_protein_104-like,_transcript_variant_X2	Olive	PF02365:No_apical_meristem_(NAM)_protein	IPR001372:Dynein light chain, type 1/2//IPR037177:Dynein light chain superfamily//IPR019763:Dynein light chain, type 1/2, conserved site
LOC111365480	1251.5	0.981762	1.97488	0.132446	7.41254	1.24e-13	7.6e-13	XP_022841802.1	uncharacterized_LOC111365480	Olive	PF03364:Polyketide_cyclase_/_dehydrase_and_lipid_transport
LOC111365493	72.5632	1.33898	2.52972	0.326457	4.10155	4.1e-05	0.000118054	XP_022841818.1	probable_DNA_helicase_MCM8,_transcript_variant_X2	Olive	PF00493:MCM_P-loop_domain//PF17207:MCM_OB_domain//PF17855:MCM_AAA-lid_domain	IPR032675:Leucine-rich repeat domain superfamily//IPR000719:Protein kinase domain//IPR001611:Leucine-rich repeat//IPR011009:Protein kinase-like domain superfamily//IPR017441:Protein kinase, ATP binding site//IPR003591:Leucine-rich repeat, typical subtype//IPR008271:Serine/threonine-protein kinase, active site
LOC111365496	1292.13	0.657547	1.5774	0.180286	3.64724	0.000265076	0.000679687	XP_022841819.1	protein_REVEILLE_8	Olive	PF00249:Myb-like_DNA-binding_domain
LOC111365501	166.474	0.532317	1.44625	0.222254	2.39509	0.0166164	0.0311307	XP_022841828.1	uncharacterized_LOC111365501	Olive		IPR002109:Glutaredoxin//IPR036249:Thioredoxin-like superfamily
LOC111365504	151.122	3.0774	8.44094	0.286322	10.7481	6.05e-27	7.1e-26	XP_022841827.1	polygalacturonase_At1g48100-like	Olive	PF00295:Glycosyl_hydrolases_family_28
LOC111365507	69.3055	1.48365	2.79656	0.380467	3.89956	9.64e-05	0.00026345	XP_022841831.1	uncharacterized_LOC111365507	Olive		IPR027417:P-loop containing nucleoside triphosphate hydrolase
LOC111365512	89.7211	1.11726	2.16935	0.313334	3.56571	0.000362873	0.000911341	XP_022841835.1	transcription_factor_E2FA-like	Olive	PF16421:E2F_transcription_factor_CC-MB_domain//PF02319:E2F/DP_family_winged-helix_DNA-binding_domain
LOC111365524	406.674	0.957191	1.94153	0.258901	3.69714	0.000218044	0.000566564	XP_022841887.1	RING_finger_protein_B-like,_transcript_variant_X8	Olive	PF13418:Galactose_oxidase,_central_domain
LOC111365564	271.685	0.927827	1.90241	0.177746	5.21995	1.79e-07	6.79e-07	XP_022841899.1	organelle_RRM_domain-containing_protein_1,_chloroplastic,_transcript_variant_X3	Olive	PF00076:RNA_recognition_motif._(a.k.a._RRM,_RBD,_or_RNP_domain)
LOC111365599	4524.59	0.829588	1.77718	0.113121	7.33364	2.24e-13	1.35e-12	XP_022841913.1	chlorophyll_a-b_binding_protein_CP29.2,_chloroplastic	Olive	PF00504:Chlorophyll_A-B_binding_protein	IPR036509:Peptide methionine sulphoxide reductase MsrA superfamily
LOC111365608	1756.15	2.20197	4.60106	0.141306	15.5829	9.51e-55	2.58e-53	XP_022841918.1	glycerol-3-phosphate_2-O-acyltransferase_6-like	Olive	PF12710:haloacid_dehalogenase-like_hydrolase//PF01553:Acyltransferase	IPR001104:3-oxo-5-alpha-steroid 4-dehydrogenase, C-terminal
LOC111365611	89.6856	3.29333	9.80374	0.394415	8.34991	6.83e-17	5.09e-16	XP_022841919.1	uncharacterized_protein_At3g28850	Olive	PF00462:Glutaredoxin	IPR038469:tRNAHis guanylyltransferase Thg1 superfamily
LOC111365626	389.938	0.98743	1.98265	0.165508	5.96605	2.43e-09	1.1e-08	XP_022841941.1	protein_NRT1/_PTR_FAMILY_5.5-like,_transcript_variant_X2	Olive	PF00854:POT_family
LOC111365635	419.279	1.23502	2.35384	0.166251	7.42861	1.1e-13	6.75e-13	XP_022841944.1	WD-40_repeat-containing_protein_MSI4-like	Olive	PF00400:WD_domain,_G-beta_repeat	IPR003851:Zinc finger, Dof-type
LOC111365638	650.985	1.00384	2.00533	0.151664	6.61881	3.62e-11	1.89e-10	XP_022841947.1	putative_tRNA_(cytidine(32)/guanosine(34)-2'-O)-methyltransferase	Olive	PF01728:FtsJ-like_methyltransferase
LOC111365645	1828.59	1.03762	2.05284	0.123447	8.40538	4.26e-17	3.22e-16	XP_022841966.1	sulfoquinovosyl_transferase_SQD2-like,_transcript_variant_X3	Olive	PF00534:Glycosyl_transferases_group_1//PF13439:Glycosyltransferase_Family_4	IPR011989:Armadillo-like helical//IPR016024:Armadillo-type fold
LOC111365658	625.407	0.325523	1.25312	0.138731	2.34643	0.0189541	0.0350476			Olive		IPR001356:Homeobox domain//IPR009057:Homeobox-like domain superfamily//IPR006563:POX domain
LOC111365671	72.1824	2.69954	6.49596	0.409696	6.58914	4.42e-11	2.29e-10			Olive
LOC111365690	156.014	0.669214	1.59021	0.234455	2.85434	0.00431262	0.00907795	XP_022841993.1	tRNA_(guanine(37)-N1)-methyltransferase_2	Olive	PF02475:Met-10+_like-protein
LOC111365691	103.535	0.78676	1.7252	0.312399	2.51844	0.0117875	0.0228278	XP_022841994.1	rhodanese-like_domain-containing_protein_8,_chloroplastic	Olive	PF12368:Rhodanase_C-terminal//PF17773:UPF0176_acylphosphatase_like_domain//PF00581:Rhodanese-like_domain	IPR013083:Zinc finger, RING/FYVE/PHD-type//IPR011016:Zinc finger, RING-CH-type
LOC111365733	729.627	1.60877	3.04991	0.155618	10.3379	4.75e-25	5.16e-24		putative_late_blight_resistance_protein_homolog_R1A-10	Olive		IPR007656:GTD-binding domain
LOC111365754	108.463	2.24651	4.74533	0.324691	6.9189	4.55e-12	2.53e-11	XP_022842057.1	receptor_protein_kinase-like_protein_ZAR1	Olive	PF07714:Protein_tyrosine_kinase//PF00560:Leucine_Rich_Repeat//PF08263:Leucine_rich_repeat_N-terminal_domain	IPR017871:ABC transporter, conserved site//IPR027417:P-loop containing nucleoside triphosphate hydrolase//IPR036640:ABC transporter type 1, transmembrane domain superfamily//IPR003439:ABC transporter-like//IPR011527:ABC transporter type 1, transmembrane domain//IPR003593:AAA+ ATPase domain
LOC111365860	1775.67	0.917752	1.88917	0.225826	4.06398	4.82e-05	0.000137591	XP_022842135.1	ferredoxin-dependent_glutamate_synthase,_chloroplastic-like	Olive	PF01493:GXGXG_motif//PF04898:Glutamate_synthase_central_domain	IPR002833:Peptidyl-tRNA hydrolase, PTH2//IPR023476:Peptidyl-tRNA hydrolase II domain superfamily
LOC111365873	1083.97	1.05853	2.08281	0.187672	5.64034	1.7e-08	7.13e-08	XP_022842147.1	insulin-degrading_enzyme-like_1,_peroxisomal	Olive	PF05193:Peptidase_M16_inactive_domain//PF16187:Middle_or_third_domain_of_peptidase_M16	IPR006168:Glycerol-3-phosphate dehydrogenase, NAD-dependent//IPR017751:Glycerol-3-phosphate dehydrogenase, NAD-dependent, eukaryotic//IPR013328:6-phosphogluconate dehydrogenase, domain 2//IPR036291:NAD(P)-binding domain superfamily//IPR008927:6-phosphogluconate dehydrogenase-like, C-terminal domain superfamily
LOC111365878	981.442	0.311143	1.24069	0.126343	2.46269	0.0137898	0.0263174	XP_022842160.1	protein_MAIN-LIKE_2-like,_transcript_variant_X9	Olive	PF10536:Plant_mobile_domain
LOC111365886	157.168	0.759774	1.69322	0.229015	3.31757	0.000908057	0.00214685	XP_022842180.1	uracil_phosphoribosyltransferase	Olive	PF14681:Uracil_phosphoribosyltransferase	IPR000719:Protein kinase domain//IPR017441:Protein kinase, ATP binding site//IPR008271:Serine/threonine-protein kinase, active site//IPR011009:Protein kinase-like domain superfamily
LOC111365887	477.201	1.39154	2.62358	0.148467	9.37272	7.07e-21	6.36e-20	XP_022842177.1	pentatricopeptide_repeat-containing_protein_At1g80270,_mitochondrial-like	Olive	PF01535:PPR_repeat//PF13812:Pentatricopeptide_repeat_domain	IPR042099:AMP-dependent synthetase-like superfamily//IPR020459:AMP-binding//IPR020845:AMP-binding, conserved site
LOC111365889	241.072	2.58217	5.98841	0.240289	10.7461	6.18e-27	7.25e-26	XP_022842183.1	uncharacterized_LOC111365889,_transcript_variant_X4	Olive		IPR013087:Zinc finger C2H2-type//IPR036236:Zinc finger C2H2 superfamily
LOC111365891	502.638	1.87713	3.67343	0.194337	9.65911	4.5e-22	4.31e-21	XP_022842207.1	disease_resistance_protein_At4g27190-like,_transcript_variant_X9	Olive	PF00931:NB-ARC_domain
LOC111365904	633.173	1.68639	3.21851	0.182541	9.23842	2.5e-20	2.2e-19	XP_022842223.1	H/ACA_ribonucleoprotein_complex_subunit_4-like	Olive	PF01509:TruB_family_pseudouridylate_synthase_(N_terminal_domain)//PF01472:PUA_domain//PF08068:DKCLD_(NUC011)_domain//PF16198:tRNA_pseudouridylate_synthase_B_C-terminal_domain
LOC111365908	682.236	1.06704	2.09514	0.155378	6.86741	6.54e-12	3.59e-11	XP_022842229.1	small_nuclear_ribonucleoprotein_SmD3b-like	Olive	PF01423:LSM_domain
LOC111365909	316.353	3.37814	10.3973	0.228137	14.8075	1.31e-49	3.15e-48	XP_022842235.1	tubby-like_protein_8	Olive	PF01167:Tub_family
LOC111365911	171.894	2.01434	4.03996	0.248354	8.11078	5.03e-16	3.56e-15	XP_022842233.1	probably_inactive_leucine-rich_repeat_receptor-like_protein_kinase_At5g06940,_transcript_variant_X3	Olive	PF13855:Leucine_rich_repeat//PF00069:Protein_kinase_domain//PF08263:Leucine_rich_repeat_N-terminal_domain
LOC111365912	1686.61	0.495933	1.41023	0.124299	3.98984	6.61e-05	0.000185055	XP_022842236.1	uncharacterized_LOC111365912	Olive		IPR017907:Zinc finger, RING-type, conserved site//IPR001841:Zinc finger, RING-type//IPR013083:Zinc finger, RING/FYVE/PHD-type//IPR036397:Ribonuclease H superfamily//IPR002867:IBR domain//IPR012337:Ribonuclease H-like superfamily
LOC111365913	390.735	0.661496	1.58172	0.15132	4.37151	1.23e-05	3.79e-05	XP_022842238.1	beta-D-glucosyl_crocetin_beta-1,6-glucosyltransferase-like,_transcript_variant_X2	Olive	PF00201:UDP-glucoronosyl_and_UDP-glucosyl_transferase	IPR000850:Adenylate kinase/UMP-CMP kinase//IPR027417:P-loop containing nucleoside triphosphate hydrolase//IPR006259:Adenylate kinase subfamily//IPR033690:Adenylate kinase, conserved site
LOC111365917	515.648	0.410516	1.32916	0.138687	2.96002	0.00307618	0.00663514	XP_022842243.1	transcription_factor_bHLH48-like,_transcript_variant_X2	Olive	PF00010:Helix-loop-helix_DNA-binding_domain	IPR037523:Vicinal oxygen chelate (VOC) domain//IPR029068:Glyoxalase/Bleomycin resistance protein/Dihydroxybiphenyl dioxygenase
LOC111365918	2248.39	0.367924	1.29049	0.109483	3.36055	0.000777875	0.00185893		uncharacterized_LOC111365918	Olive		IPR000086:NUDIX hydrolase domain//IPR015797:NUDIX hydrolase-like domain superfamily
LOC111365924	270.68	2.74166	6.68839	0.207286	13.2264	6.18e-40	1.12e-38	XP_022842253.1	protein_POLYCHOME	Olive		IPR020471:Aldo/keto reductase//IPR018170:Aldo/keto reductase, conserved site//IPR023210:NADP-dependent oxidoreductase domain//IPR036812:NADP-dependent oxidoreductase domain superfamily
LOC111365932	529.52	2.12145	4.35131	0.155949	13.6035	3.82e-42	7.44e-41	XP_022842267.1	squamosa_promoter-binding-like_protein_14,_transcript_variant_X3	Olive	PF03110:SBP_domain	IPR001878:Zinc finger, CCHC-type//IPR036875:Zinc finger, CCHC-type superfamily
LOC111365933	195.921	0.678721	1.60072	0.200626	3.38301	0.00071697	0.00172084	XP_022842271.1	transcription_termination_factor_MTEF18,_mitochondrial-like,_transcript_variant_X5	Olive	PF02536:mTERF
LOC111365936	187.638	0.990763	1.98724	0.207406	4.77693	1.78e-06	6.09e-06	XP_022842323.1	glutamyl-tRNA(Gln)_amidotransferase_subunit_A-like,_transcript_variant_X7	Olive	PF01425:Amidase	IPR003657:WRKY domain//IPR036576:WRKY domain superfamily
LOC111365937	138.922	1.06724	2.09541	0.279012	3.82505	0.000130746	0.000350341	XP_022842276.1	probable_plastid-lipid-associated_protein_13,_chloroplastic	Olive	PF04755:PAP_fibrillin	IPR011990:Tetratricopeptide-like helical domain superfamily//IPR019734:Tetratricopeptide repeat//IPR013026:Tetratricopeptide repeat-containing domain
LOC111365946	525.372	0.803558	1.7454	0.148491	5.41148	6.25e-08	2.48e-07	XP_022842289.1	leucine-rich_repeat_receptor-like_tyrosine-protein_kinase_PXC3	Olive	PF07714:Protein_tyrosine_kinase//PF00560:Leucine_Rich_Repeat//PF13855:Leucine_rich_repeat//PF08263:Leucine_rich_repeat_N-terminal_domain	IPR000608:Ubiquitin-conjugating enzyme E2//IPR016135:Ubiquitin-conjugating enzyme/RWD-like//IPR023313:Ubiquitin-conjugating enzyme, active site
LOC111365953	156.332	0.498136	1.41239	0.21734	2.29197	0.0219076	0.0399574			Olive		IPR005735:Zinc finger, LSD1-type
LOC111365971	148.283	2.28704	4.88054	0.28593	7.99861	1.26e-15	8.72e-15	XP_022842329.1	UPF0481_protein_At3g47200-like	Olive	PF03140:Plant_protein_of_unknown_function
LOC111365984	1333.5	1.37528	2.59417	0.124227	11.0706	1.74e-28	2.19e-27	XP_022842354.1	protein_DETOXIFICATION_35-like	Olive	PF01554:MatE
LOC111365987	632.552	0.445528	1.36181	0.14794	3.01154	0.00259925	0.0056874	XP_022842356.1	cyclic_nucleotide-gated_ion_channel_17-like,_transcript_variant_X2	Olive	PF00027:Cyclic_nucleotide-binding_domain//PF00520:Ion_transport_protein
LOC111365996	2574.58	1.84497	3.59247	0.116299	15.864	1.13e-56	3.19e-55	XP_022842373.1	BAHD_acyltransferase_DCR-like	Olive	PF02458:Transferase_family
LOC111366000	150.764	1.47446	2.77879	0.246547	5.98042	2.23e-09	1.01e-08	XP_022842377.1	pentatricopeptide_repeat-containing_protein_At1g09900-like,_transcript_variant_X3	Olive	PF13041:PPR_repeat_family//PF12854:PPR_repeat	IPR000315:B-box-type zinc finger
LOC111366008	136.479	1.1406	2.20472	0.256904	4.43978	9.01e-06	2.82e-05	XP_022842386.1	50S_ribosomal_protein_L3-2,_chloroplastic-like	Olive		IPR000719:Protein kinase domain//IPR008271:Serine/threonine-protein kinase, active site//IPR017441:Protein kinase, ATP binding site//IPR011009:Protein kinase-like domain superfamily
LOC111366011	1770.84	0.867241	1.82417	0.139438	6.21957	4.99e-10	2.38e-09	XP_022842390.1	110_kDa_U5_small_nuclear_ribonucleoprotein_component_CLO	Olive	PF03144:Elongation_factor_Tu_domain_2//PF00679:Elongation_factor_G_C-terminus//PF00009:Elongation_factor_Tu_GTP_binding_domain//PF16004:116_kDa_U5_small_nuclear_ribonucleoprotein_component_N-terminus//PF03764:Elongation_factor_G,_domain_IV	IPR038508:ArfGAP domain superfamily//IPR037278:ARFGAP/RecO-like zinc finger//IPR001164:Arf GTPase activating protein
LOC111366024	276.305	0.553401	1.46754	0.170377	3.2481	0.0011618	0.00269708	XP_022842410.1	zinc_finger_CCCH_domain-containing_protein_34-like,_transcript_variant_X2	Olive	PF00642:Zinc_finger_C-x8-C-x5-C-x3-H_type_(and_similar)
LOC111366025	726.476	0.885436	1.84732	0.137485	6.44023	1.19e-10	5.99e-10	XP_022842413.1	GTP-binding_protein_OBGC,_chloroplastic,_transcript_variant_X2	Olive	PF09269:Domain_of_unknown_function_(DUF1967)//PF01018:GTP1/OBG//PF01926:50S_ribosome-binding_GTPase	IPR038464:Ribosomal protein L38e superfamily
LOC111366026	814.152	0.883657	1.84505	0.15889	5.56142	2.68e-08	1.1e-07	XP_022842417.1	proline-rich_receptor-like_protein_kinase_PERK13,_transcript_variant_X4	Olive	PF07714:Protein_tyrosine_kinase
LOC111366033	217.445	3.24651	9.49067	0.248658	13.0561	5.87e-39	1.04e-37	XP_022842426.1	methylsterol_monooxygenase_1-1-like	Olive	PF04116:Fatty_acid_hydroxylase_superfamily
LOC111366038	581.537	2.37463	5.18604	0.149363	15.8983	6.51e-57	1.85e-55	XP_022842435.1	NDR1/HIN1-like_protein_1	Olive	PF03168:Late_embryogenesis_abundant_protein	IPR036893:SBP domain superfamily//IPR004333:SBP domain
LOC111366041	1007.67	0.327702	1.25501	0.128023	2.55972	0.0104757	0.0204926	XP_022842443.1	uncharacterized_LOC111366041,_transcript_variant_X2	Olive		IPR036220:UDP-glucose/GDP-mannose dehydrogenase, C-terminal domain superfamily//IPR008927:6-phosphogluconate dehydrogenase-like, C-terminal domain superfamily//IPR014027:UDP-glucose/GDP-mannose dehydrogenase, C-terminal//IPR017476:UDP-glucose/GDP-mannose dehydrogenase//IPR036291:NAD(P)-binding domain superfamily//IPR028356:UDP-glucose 6-dehydrogenase, eukaryotic type
LOC111366045	206.591	0.624382	1.54155	0.194892	3.20372	0.00135662	0.0031143	XP_022842449.1	33_kDa_ribonucleoprotein,_chloroplastic	Olive	PF00076:RNA_recognition_motif._(a.k.a._RRM,_RBD,_or_RNP_domain)
LOC111366049	1127.92	0.504118	1.41826	0.190005	2.65319	0.00797353	0.015977	XP_022842460.1	serine/threonine-protein_kinase_RUNKEL-like,_transcript_variant_X2	Olive	PF00069:Protein_kinase_domain
LOC111366057	105.613	0.799109	1.74003	0.291374	2.74255	0.00609637	0.0124985	XP_022842472.1	CASP-like_protein_1	Olive	PF04535:Domain_of_unknown_function_(DUF588)	IPR036378:FAS1 domain superfamily//IPR000782:FAS1 domain
LOC111366058	921.441	1.04454	2.06271	0.241958	4.31703	1.58e-05	4.78e-05	XP_022842473.1	ISWI_chromatin-remodeling_complex_ATPase_CHR11	Olive	PF09110:HAND//PF09111:SLIDE//PF00176:SNF2_family_N-terminal_domain//PF00271:Helicase_conserved_C-terminal_domain
LOC111366060	596.593	0.479652	1.39441	0.152863	3.1378	0.00170221	0.00383924	XP_022842475.1	RNA-binding_KH_domain-containing_protein_PEPPER-like	Olive	PF00013:KH_domain
LOC111366061	236.86	1.0459	2.06466	0.270944	3.86022	0.000113284	0.000306309	XP_022842476.1	uncharacterized_membrane_protein_At1g16860-like	Olive
LOC111366063	476.505	1.8584	3.62605	0.176303	10.5409	5.59e-26	6.32e-25	XP_022842477.1	protein_CHLOROPLAST_IMPORT_APPARATUS_2-like	Olive	PF06203:CCT_motif
LOC111366070	399.618	0.428899	1.34621	0.156974	2.7323	0.00628947	0.0128577			Olive
LOC111366080	259.216	1.08359	2.1193	0.184608	5.86967	4.37e-09	1.93e-08	XP_022842498.1	nitrate_regulatory_gene2_protein-like,_transcript_variant_X2	Olive	PF04783:Protein_of_unknown_function_(DUF630)//PF04782:Protein_of_unknown_function_(DUF632)
LOC111366095	404.777	1.62144	3.07683	0.161453	10.0428	9.88e-24	1.02e-22	XP_022842527.1	squamosa_promoter-binding-like_protein_7,_transcript_variant_X2	Olive	PF03110:SBP_domain
LOC111366096	544.665	1.15329	2.22421	0.202304	5.70079	1.19e-08	5.08e-08	XP_022842517.1	protein_STRICTOSIDINE_SYNTHASE-LIKE_4-like	Olive	PF03088:Strictosidine_synthase	IPR038765:Papain-like cysteine peptidase superfamily
LOC111366100	2868.14	0.956571	1.94069	0.111038	8.61479	7.01e-18	5.48e-17	XP_022842522.1	20_kDa_chaperonin,_chloroplastic	Olive	PF00166:Chaperonin_10_Kd_subunit	IPR036910:High mobility group box domain superfamily//IPR009071:High mobility group box domain
LOC111366101	320.061	1.86442	3.64122	0.176002	10.5932	3.2e-26	3.65e-25	XP_022842524.1	3-oxoacyl-[acyl-carrier-protein]_synthase_II,_chloroplastic-like,_transcript_variant_X2	Olive	PF00109:Beta-ketoacyl_synthase,_N-terminal_domain//PF02801:Beta-ketoacyl_synthase,_C-terminal_domain
LOC111366102	555.251	5.18061	36.2676	0.248508	20.8468	1.63e-96	9.34e-95	XP_022842525.1	auxin-binding_protein_ABP20-like	Olive	PF00190:Cupin	IPR029057:Phosphoribosyltransferase-like//IPR000836:Phosphoribosyltransferase domain
LOC111366105	526.103	0.868942	1.82632	0.164074	5.29605	1.18e-07	4.57e-07	XP_022842529.1	40S_ribosomal_protein_S3-3-like	Olive	PF07650:KH_domain//PF00189:Ribosomal_protein_S3,_C-terminal_domain
LOC111366107	398.116	0.367124	1.28978	0.160145	2.29245	0.0218795	0.0399083	XP_022842531.1	protein_PLASTID_MOVEMENT_IMPAIRED_1-RELATED_1-like	Olive	PF01476:LysM_domain//PF10358:N-terminal_C2_in_EEIG1_and_EHBP1_proteins	IPR003657:WRKY domain//IPR036576:WRKY domain superfamily
LOC111366111	749.092	0.622187	1.53921	0.124254	5.00739	5.52e-07	2e-06			Olive		IPR001680:WD40 repeat//IPR020472:G-protein beta WD-40 repeat//IPR015943:WD40/YVTN repeat-like-containing domain superfamily//IPR017986:WD40-repeat-containing domain//IPR036322:WD40-repeat-containing domain superfamily//IPR019775:WD40 repeat, conserved site
LOC111366116	312.87	0.830291	1.77804	0.173774	4.77799	1.77e-06	6.06e-06	XP_022842550.1	pentatricopeptide_repeat-containing_protein_At1g08610,_transcript_variant_X3	Olive	PF13041:PPR_repeat_family	IPR038552:Tim21 IMS domain superfamily
LOC111366127	136.658	4.20048	18.3853	0.377529	11.1262	9.35e-29	1.19e-27	XP_022842571.1	zinc_finger_CCCH_domain-containing_protein_20-like	Olive	PF00642:Zinc_finger_C-x8-C-x5-C-x3-H_type_(and_similar)	IPR036529:Coactivator CBP, KIX domain superfamily
LOC111366130	279.44	0.906445	1.87442	0.17375	5.21694	1.82e-07	6.89e-07	XP_022842576.1	mitochondrial-processing_peptidase_subunit_alpha-like,_transcript_variant_X3	Olive	PF00675:Insulinase_(Peptidase_family_M16)//PF05193:Peptidase_M16_inactive_domain
LOC111366131	50.586	1.71332	3.27914	0.398299	4.30158	1.7e-05	5.11e-05	XP_022842580.1	NAC_domain-containing_protein_68-like,_transcript_variant_X3	Olive	PF02365:No_apical_meristem_(NAM)_protein	IPR036259:MFS transporter superfamily//IPR003663:Sugar/inositol transporter//IPR005829:Sugar transporter, conserved site//IPR020846:Major facilitator superfamily domain
LOC111366134	397.93	3.63959	12.4631	0.224329	16.2243	3.39e-59	1.03e-57	XP_022842583.1	protein_IQ-DOMAIN_31-like	Olive	PF00612:IQ_calmodulin-binding_motif//PF13178:Protein_of_unknown_function_(DUF4005)
LOC111366139	200.65	0.826766	1.7737	0.204802	4.03691	5.42e-05	0.000153332	XP_022842590.1	methyltransferase-like_protein_5	Olive	PF05175:Methyltransferase_small_domain
LOC111366140	520.428	0.426096	1.34359	0.14273	2.98533	0.00283274	0.00615663	XP_022842591.1	protein_NUCLEAR_FUSION_DEFECTIVE_6,_chloroplastic/mitochondrial-like	Olive		IPR017930:Myb domain//IPR001005:SANT/Myb domain//IPR009057:Homeobox-like domain superfamily
LOC111366141	267.774	1.92978	3.80998	0.192617	10.0188	1.26e-23	1.29e-22	XP_022842592.1	proteinaceous_RNase_P_1,_chloroplastic/mitochondrial-like,_transcript_variant_X2	Olive	PF17177:Pentacotripeptide-repeat_region_of_PRORP//PF16953:Protein-only_RNase_P	IPR011333:SKP1/BTB/POZ domain superfamily//IPR000210:BTB/POZ domain
LOC111366143	428.598	0.43319	1.35022	0.149615	2.89537	0.00378714	0.00804937	XP_022842596.1	chloroplast_processing_peptidase-like	Olive	PF10502:Signal_peptidase,_peptidase_S26	IPR003409:MORN motif
LOC111366148	89.7963	1.53267	2.8932	0.309185	4.95713	7.15e-07	2.55e-06	XP_022842614.1	SHUGOSHIN_1-like,_transcript_variant_X2	Olive	PF07557:Shugoshin_C_terminus
LOC111366149	473.315	1.5115	2.85107	0.181999	8.30502	9.98e-17	7.36e-16	XP_022842604.1	fe-S_cluster_assembly_factor_HCF101,_chloroplastic-like,_transcript_variant_X3	Olive	PF01883:Iron-sulfur_cluster_assembly_protein//PF10609:NUBPL_iron-transfer_P-loop_NTPase//PF06155:Protein_of_unknown_function_(DUF971)
LOC111366152	436.403	0.654072	1.5736	0.158341	4.13078	3.62e-05	0.000104718	XP_022842608.1	uncharacterized_protein_C4F10.09c	Olive	PF03914:CBF/Mak21_family	IPR004883:Lateral organ boundaries, LOB
LOC111366156	705.402	1.56349	2.95567	0.191767	8.15305	3.55e-16	2.54e-15	XP_022842615.1	peroxisomal_(S)-2-hydroxy-acid_oxidase_GLO4-like,_transcript_variant_X3	Olive	PF01070:FMN-dependent_dehydrogenase	IPR036426:Bulb-type lectin domain superfamily//IPR001480:Bulb-type lectin domain//IPR008271:Serine/threonine-protein kinase, active site//IPR000719:Protein kinase domain//IPR011009:Protein kinase-like domain superfamily//IPR017441:Protein kinase, ATP binding site//IPR024171:S-receptor-like serine/threonine-protein kinase//IPR013032:EGF-like, conserved site//IPR003609:PAN/Apple domain
LOC111366163	105.382	2.8171	7.04743	0.387966	7.26119	3.84e-13	2.29e-12	XP_022842626.1	probable_pectate_lyase_13	Olive	PF00544:Pectate_lyase
LOC111366165	7601.41	0.767271	1.70205	0.150858	5.08604	3.66e-07	1.35e-06	XP_022842627.1	acid_phosphatase_1-like	Olive	PF03767:HAD_superfamily,_subfamily_IIIB_(Acid_phosphatase)	IPR003661:Signal transduction histidine kinase, dimerisation/phosphoacceptor domain//IPR036890:Histidine kinase/HSP90-like ATPase superfamily//IPR004358:Signal transduction histidine kinase-related protein, C-terminal//IPR005467:Histidine kinase domain//IPR036097:Signal transduction histidine kinase, dimerisation/phosphoacceptor domain superfamily//IPR003594:Histidine kinase/HSP90-like ATPase
LOC111366166	14316.3	1.63397	3.10365	0.191603	8.52786	1.49e-17	1.15e-16	XP_022842628.1	apyrase-like	Olive	PF01150:GDA1/CD39_(nucleoside_phosphatase)_family	IPR018456:PTR2 family proton/oligopeptide symporter, conserved site//IPR036259:MFS transporter superfamily
LOC111366167	227.717	1.16959	2.24949	0.190378	6.14355	8.07e-10	3.8e-09		uncharacterized_LOC111366167	Olive
LOC111366169	533.553	0.360624	1.28398	0.140275	2.57083	0.0101457	0.0199106	XP_022842632.1	exportin-T-like,_transcript_variant_X7	Olive	PF08389:Exportin_1-like_protein	IPR011009:Protein kinase-like domain superfamily//IPR000719:Protein kinase domain//IPR032675:Leucine-rich repeat domain superfamily//IPR008271:Serine/threonine-protein kinase, active site
LOC111366172	153.363	0.657654	1.57752	0.228162	2.8824	0.00394654	0.00836386		uncharacterized_LOC111366172	Olive		IPR007527:Zinc finger, SWIM-type//IPR006564:Zinc finger, PMZ-type
LOC111366177	184.087	1.07135	2.1014	0.243029	4.40833	1.04e-05	3.23e-05	XP_022842643.1	peptide_deformylase_1A,_chloroplastic	Olive	PF01327:Polypeptide_deformylase	IPR011008:Dimeric alpha-beta barrel//IPR013097:Stress responsive alpha-beta barrel
LOC111366178	127.748	2.99487	7.97159	0.312081	9.59644	8.28e-22	7.83e-21	XP_022842646.1	ACT_domain-containing_protein_ACR10-like	Olive
LOC111366180	656.74	0.320535	1.24879	0.135482	2.36588	0.0179874	0.0334237	XP_022842645.1	caffeoylshikimate_esterase-like	Olive	PF12146:Serine_aminopeptidase,_S33
LOC111366183	104.783	3.06028	8.34136	0.352057	8.69257	3.54e-18	2.81e-17	XP_022842648.1	auxin-induced_protein_22C-like	Olive	PF02309:AUX/IAA_family	IPR011598:Myc-type, basic helix-loop-helix (bHLH) domain//IPR036638:Helix-loop-helix DNA-binding domain superfamily
LOC111366185	157.531	0.524704	1.43864	0.219753	2.3877	0.0169542	0.0316999	XP_022842651.1	zinc_finger_CCCH_domain-containing_protein_25,_transcript_variant_X3	Olive	PF00076:RNA_recognition_motif._(a.k.a._RRM,_RBD,_or_RNP_domain)//PF00642:Zinc_finger_C-x8-C-x5-C-x3-H_type_(and_similar)
LOC111366188	3298.97	0.359534	1.28301	0.119523	3.00806	0.00262923	0.00574739	XP_022842665.1	leucine--tRNA_ligase,_cytoplasmic-like,_transcript_variant_X2	Olive	PF00133:tRNA_synthetases_class_I_(I,_L,_M_and_V)//PF08264:Anticodon-binding_domain_of_tRNA	IPR011331:Ribosomal protein L37ae/L37e//IPR002674:Ribosomal protein L37ae//IPR011332:Zinc-binding ribosomal protein
LOC111366190	61.5546	2.42522	5.37111	0.426902	5.68097	1.34e-08	5.69e-08	XP_022842656.1	proline-rich_receptor-like_protein_kinase_PERK15,_transcript_variant_X3	Olive	PF07714:Protein_tyrosine_kinase
LOC111366193	81.0716	0.75988	1.69335	0.294398	2.58113	0.00984767	0.0193843	XP_022842663.1	cytochrome_c-type_biogenesis_CcmH-like_mitochondrial_protein,_transcript_variant_X6	Olive	PF03918:Cytochrome_C_biogenesis_protein
LOC111366194	1668.2	3.11044	8.63646	0.140423	22.1504	1.03e-108	7.03e-107	XP_022842664.1	malonate--CoA_ligase	Olive	PF00501:AMP-binding_enzyme//PF13193:AMP-binding_enzyme_C-terminal_domain	IPR029044:Nucleotide-diphospho-sugar transferases
LOC111366199	179.323	1.99755	3.99321	0.327639	6.0968	1.08e-09	5.04e-09	XP_022842674.1	uncharacterized_LOC111366199	Olive	PF13259:Protein_of_unknown_function_(DUF4050)	IPR003607:HD/PDEase domain
LOC111366201	211.348	0.437411	1.35417	0.195951	2.23224	0.0255991	0.0458597	XP_022842675.1	uncharacterized_LOC111366201	Olive	PF08797:HIRAN_domain//PF00498:FHA_domain//PF06087:Tyrosyl-DNA_phosphodiesterase	IPR032675:Leucine-rich repeat domain superfamily//IPR008271:Serine/threonine-protein kinase, active site//IPR017441:Protein kinase, ATP binding site//IPR011009:Protein kinase-like domain superfamily//IPR000719:Protein kinase domain
LOC111366203	637.726	0.770484	1.70584	0.165731	4.649	3.34e-06	1.1e-05	XP_022842682.1	inositol_polyphosphate_multikinase_alpha,_transcript_variant_X4	Olive	PF03770:Inositol_polyphosphate_kinase
LOC111366217	270.486	1.11987	2.17328	0.192576	5.81521	6.06e-09	2.65e-08	XP_022842692.1	probable_alpha-mannosidase_At5g13980	Olive	PF09261:Alpha_mannosidase_middle_domain//PF17677:Glycosyl_hydrolases_family_38_C-terminal_beta_sandwich_domain//PF07748:Glycosyl_hydrolases_family_38_C-terminal_domain//PF01074:Glycosyl_hydrolases_family_38_N-terminal_domain	IPR018247:EF-Hand 1, calcium-binding site//IPR002048:EF-hand domain//IPR000719:Protein kinase domain//IPR011009:Protein kinase-like domain superfamily//IPR008271:Serine/threonine-protein kinase, active site//IPR011992:EF-hand domain pair
LOC111366234	519.039	0.414457	1.3328	0.171195	2.42097	0.0154791	0.029205	XP_022842714.1	serine/threonine-protein_kinase_ATG1c-like,_transcript_variant_X4	Olive	PF00069:Protein_kinase_domain
LOC111366238	264.364	3.48746	11.2158	0.250275	13.9345	3.91e-44	8.07e-43	XP_022842721.1	uncharacterized_LOC111366238,_transcript_variant_X2	Olive		IPR042529:Initiation factor 2B-like, C-terminal//IPR037171:NagB/RpiA transferase-like//IPR005251:Methylthioribose-1-phosphate isomerase//IPR011559:Initiation factor 2B alpha/beta/delta
LOC111366239	88.4559	2.39287	5.25199	0.343525	6.96561	3.27e-12	1.83e-11	XP_022842750.1	thaumatin-like_protein,_transcript_variant_X4	Olive	PF00314:Thaumatin_family
LOC111366241	408.373	1.98088	3.94735	0.161938	12.2323	2.09e-34	3.2e-33	XP_022842725.1	cell_division_protein_FtsZ_homolog_2-1,_chloroplastic-like,_transcript_variant_X3	Olive	PF12327:FtsZ_family,_C-terminal_domain//PF00091:Tubulin/FtsZ_family,_GTPase_domain
LOC111366244	78.6714	1.3228	2.50151	0.309995	4.26716	1.98e-05	5.92e-05	XP_022842731.1	germin-like_protein_subfamily_3_member_2	Olive	PF00190:Cupin	IPR027417:P-loop containing nucleoside triphosphate hydrolase
LOC111366247	360.027	0.607564	1.52368	0.170493	3.56357	0.000365847	0.000918126	XP_022842735.1	transcription_initiation_factor_TFIID_subunit_12	Olive	PF03847:Transcription_initiation_factor_TFIID_subunit_A
LOC111366254	183.263	0.72466	1.65251	0.207272	3.49617	0.00047198	0.00116415	XP_022842978.1	D-glycerate_3-kinase,_chloroplastic-like,_transcript_variant_X4	Olive		IPR034105:Sm-like protein Lsm3//IPR001163:LSM domain, eukaryotic/archaea-type//IPR010920:LSM domain superfamily
LOC111366259	398.725	2.55803	5.88902	0.176043	14.5307	7.74e-48	1.78e-46	XP_022842753.1	signal_recognition_particle_54_kDa_protein,_chloroplastic	Olive	PF02978:Signal_peptide_binding_domain//PF02881:SRP54-type_protein,_helical_bundle_domain//PF00448:SRP54-type_protein,_GTPase_domain
LOC111366277	2078.51	0.723537	1.65123	0.106343	6.80382	1.02e-11	5.52e-11	XP_022842774.1	40S_ribosomal_protein_S17-like	Olive	PF00833:Ribosomal_S17	IPR001925:Porin, eukaryotic type//IPR023614:Porin domain superfamily
LOC111366283	1080.81	1.76791	3.40561	0.192954	9.16236	5.08e-20	4.41e-19	XP_022842781.1	2-Cys_peroxiredoxin_BAS1,_chloroplastic-like	Olive	PF00578:AhpC/TSA_family//PF10417:C-terminal_domain_of_1-Cys_peroxiredoxin
LOC111366284	75.6405	2.56205	5.90548	0.360364	7.10963	1.16e-12	6.72e-12		uncharacterized_LOC111366284	Olive
LOC111366288	403.788	0.642595	1.56113	0.188796	3.40364	0.000664935	0.0016035	XP_022842784.1	calcium-dependent_protein_kinase_20-like	Olive	PF13499:EF-hand_domain_pair//PF00069:Protein_kinase_domain
LOC111366292	126.061	1.25736	2.39058	0.255053	4.9298	8.23e-07	2.91e-06	XP_022842789.1	60S_acidic_ribosomal_protein_P3-like,_transcript_variant_X2	Olive	PF00428:60s_Acidic_ribosomal_protein
LOC111366294	204.244	0.741987	1.67248	0.265805	2.79147	0.00524689	0.0108851	XP_022842790.1	60S_acidic_ribosomal_protein_P3-like	Olive	PF00428:60s_Acidic_ribosomal_protein
LOC111366299	432.066	0.776115	1.71251	0.151535	5.1217	3.03e-07	1.12e-06	XP_022842798.1	rhomboid-like_protein_15,_transcript_variant_X4	Olive	PF01694:Rhomboid_family//PF00627:UBA/TS-N_domain	IPR017441:Protein kinase, ATP binding site//IPR008271:Serine/threonine-protein kinase, active site//IPR000719:Protein kinase domain//IPR011009:Protein kinase-like domain superfamily//IPR032675:Leucine-rich repeat domain superfamily//IPR003591:Leucine-rich repeat, typical subtype
LOC111366312	540.262	0.908817	1.8775	0.16947	5.36271	8.2e-08	3.22e-07	XP_022842816.1	macrophage_migration_inhibitory_factor_homolog	Olive	PF01187:Macrophage_migration_inhibitory_factor_(MIF)	IPR006456:ZF-HD homeobox protein, Cys/His-rich dimerisation domain//IPR006455:Homeodomain, ZF-HD class//IPR001356:Homeobox domain//IPR009057:Homeobox-like domain superfamily
LOC111366313	424.245	2.53426	5.79278	0.196049	12.9266	3.18e-38	5.48e-37	XP_022842817.1	transcription_factor_bHLH35-like	Olive	PF00010:Helix-loop-helix_DNA-binding_domain	IPR000719:Protein kinase domain//IPR011009:Protein kinase-like domain superfamily//IPR008271:Serine/threonine-protein kinase, active site
LOC111366314	181.426	1.2511	2.38024	0.23311	5.36701	8.01e-08	3.14e-07	XP_022842819.1	probable_inactive_purple_acid_phosphatase_28,_transcript_variant_X2	Olive	PF00149:Calcineurin-like_phosphoesterase	IPR003107:HAT (Half-A-TPR) repeat//IPR011990:Tetratricopeptide-like helical domain superfamily
LOC111366321	411.856	0.74505	1.67603	0.190001	3.9213	8.81e-05	0.000242428	XP_022842830.1	nucleolar_MIF4G_domain-containing_protein_1-like,_transcript_variant_X2	Olive	PF02847:MA3_domain	IPR036866:Ribonuclease Z/Hydroxyacylglutathione hydrolase-like
LOC111366324	262.723	3.87425	14.6644	0.287931	13.4555	2.86e-41	5.43e-40	XP_022842833.1	phospholipase_A2-alpha-like	Olive
LOC111366326	782.475	1.15474	2.22645	0.139932	8.25217	1.56e-16	1.14e-15	XP_022842837.1	auxin_response_factor_19-like,_transcript_variant_X2	Olive	PF06507:Auxin_response_factor//PF02362:B3_DNA_binding_domain//PF02309:AUX/IAA_family	IPR000270:PB1 domain
LOC111366337	319.164	0.59047	1.50574	0.163872	3.60323	0.000314284	0.000797892	XP_022842856.1	diacylglycerol_O-acyltransferase_1-like,_transcript_variant_X3	Olive	PF03062:MBOAT,_membrane-bound_O-acyltransferase_family	IPR000571:Zinc finger, CCCH-type
LOC111366340	216.206	2.54849	5.85021	0.22771	11.1918	4.47e-29	5.73e-28	XP_022842858.1	lycopene_epsilon_cyclase,_chloroplastic	Olive	PF05834:Lycopene_cyclase_protein
LOC111366348	115.893	1.06462	2.09161	0.25498	4.1753	2.98e-05	8.7e-05	XP_022842867.1	PHD_finger_protein_ALFIN-LIKE_4-like	Olive	PF00628:PHD-finger//PF12165:Alfin	IPR000504:RNA recognition motif domain//IPR001878:Zinc finger, CCHC-type//IPR035979:RNA-binding domain superfamily//IPR036875:Zinc finger, CCHC-type superfamily//IPR012677:Nucleotide-binding alpha-beta plait domain superfamily
LOC111366349	455.858	0.504836	1.41896	0.147882	3.41377	0.000640702	0.00155051	XP_022842869.1	protein_ABHD13-like,_transcript_variant_X2	Olive	PF00326:Prolyl_oligopeptidase_family	IPR029055:Nucleophile aminohydrolases, N-terminal
LOC111366351	886.405	1.10745	2.15464	0.121379	9.12386	7.25e-20	6.27e-19	XP_022842875.1	probable_inactive_receptor_kinase_At1g48480	Olive	PF00069:Protein_kinase_domain//PF08263:Leucine_rich_repeat_N-terminal_domain	IPR027417:P-loop containing nucleoside triphosphate hydrolase//IPR005225:Small GTP-binding protein domain
LOC111366352	179.417	1.12314	2.17821	0.211013	5.32262	1.02e-07	3.97e-07	XP_022842873.1	protein_Brevis_radix-like_4	Olive	PF08381:Transcription_factor_regulating_root_and_shoot_growth_via_Pin3//PF13713:Transcription_factor_BRX_N-terminal_domain
LOC111366364	3080.59	0.663011	1.58338	0.103327	6.41663	1.39e-10	6.95e-10	XP_022842897.1	60S_ribosomal_protein_L4-like	Olive	PF14374:60S_ribosomal_protein_L4_C-terminal_domain//PF00573:Ribosomal_protein_L4/L1_family
LOC111366378	167.286	3.14872	8.86868	0.276579	11.3845	5e-30	6.6e-29	XP_022842923.1	rac-like_GTP-binding_protein_ARAC7,_transcript_variant_X2	Olive	PF00071:Ras_family	IPR016050:Proteasome beta-type subunit, conserved site//IPR029055:Nucleophile aminohydrolases, N-terminal//IPR023333:Proteasome B-type subunit
LOC111366380	339.967	1.18216	2.26917	0.171104	6.90903	4.88e-12	2.7e-11	XP_022842927.1	probable_glycosyltransferase_At5g03795,_transcript_variant_X3	Olive	PF03016:Exostosin_family	IPR027417:P-loop containing nucleoside triphosphate hydrolase
LOC111366404	116.191	2.39158	5.24731	0.290451	8.23401	1.81e-16	1.32e-15	XP_022842935.1	uncharacterized_LOC111366404	Olive		IPR008930:Terpenoid cyclases/protein prenyltransferase alpha-alpha toroid//IPR008949:Isoprenoid synthase domain superfamily//IPR036965:Terpene synthase, N-terminal domain superfamily//IPR034741:Terpene cyclase-like 1, C-terminal domain
LOC111366422	93.4091	1.14997	2.21909	0.290615	3.95702	7.59e-05	0.000210821	XP_022842951.1	polyribonucleotide_nucleotidyltransferase_2,_mitochondrial-like	Olive		IPR015424:Pyridoxal phosphate-dependent transferase//IPR015421:Pyridoxal phosphate-dependent transferase, major domain//IPR023603:Threonine aldolase//IPR015422:Pyridoxal phosphate-dependent transferase domain 1
LOC111366423	822.109	0.408547	1.32735	0.147904	2.76224	0.0057406	0.0118189	XP_022842953.1	protein_ARABIDILLO_1-like	Olive	PF00514:Armadillo/beta-catenin-like_repeat//PF12937:F-box-like	IPR035595:UDP-glycosyltransferase family, conserved site
LOC111366452	104.72	3.00687	8.0382	0.333656	9.0119	2.03e-19	1.72e-18	XP_022842976.1	thionin-2.2-like,_transcript_variant_X2	Olive		IPR029069:HotDog domain superfamily
LOC111366482	55.2902	1.84637	3.59593	0.402571	4.58643	4.51e-06	1.46e-05	XP_022842999.1	ribonucleoside-diphosphate_reductase_large_subunit-like	Olive	PF02867:Ribonucleotide_reductase,_barrel_domain	IPR027417:P-loop containing nucleoside triphosphate hydrolase
LOC111366508	60.2653	5.216	37.1683	1.78661	2.9195	0.00350591	0.00749425	XP_022843018.1	transcription_factor_MYB26-like,_transcript_variant_X4	Olive	PF00249:Myb-like_DNA-binding_domain	IPR029044:Nucleotide-diphospho-sugar transferases
LOC111366510	558.509	1.49896	2.82638	0.185886	8.06386	7.39e-16	5.19e-15	XP_022843022.1	chaperonin_60_subunit_beta_2,_chloroplastic-like	Olive	PF00118:TCP-1/cpn60_chaperonin_family
LOC111366557	69.8413	2.5962	6.0469	0.437919	5.92849	3.06e-09	1.37e-08	XP_022843062.1	photosynthetic_NDH_subunit_of_subcomplex_B_3,_chloroplastic-like	Olive	PF00111:2Fe-2S_iron-sulfur_cluster_binding_domain	IPR015943:WD40/YVTN repeat-like-containing domain superfamily//IPR001680:WD40 repeat//IPR036322:WD40-repeat-containing domain superfamily//IPR017986:WD40-repeat-containing domain
LOC111366568	167.754	1.15694	2.22984	0.386875	2.99047	0.00278551	0.00606104	XP_022843066.1	aquaporin_TIP2-1-like	Olive	PF00230:Major_intrinsic_protein	IPR000198:Rho GTPase-activating protein domain//IPR008936:Rho GTPase activation protein
LOC111366577	212.56	1.39359	2.62732	0.31977	4.35811	1.31e-05	4.02e-05	XP_022843075.1	photosynthetic_NDH_subunit_of_subcomplex_B_3,_chloroplastic-like	Olive	PF00111:2Fe-2S_iron-sulfur_cluster_binding_domain	IPR013320:Concanavalin A-like lectin/glucanase domain superfamily//IPR016455:Xyloglucan endotransglucosylase/hydrolase//IPR000757:Glycoside hydrolase family 16
LOC111366581	191.075	1.21153	2.31584	0.23189	5.22459	1.75e-07	6.63e-07	XP_022843077.1	protein_PLASTID_TRANSCRIPTIONALLY_ACTIVE_10	Olive		IPR015424:Pyridoxal phosphate-dependent transferase//IPR015422:Pyridoxal phosphate-dependent transferase domain 1//IPR015421:Pyridoxal phosphate-dependent transferase, major domain
LOC111366589	522.894	1.21703	2.32468	0.150427	8.09053	5.94e-16	4.19e-15		TORTIFOLIA1-like_protein_3	Olive		IPR032675:Leucine-rich repeat domain superfamily
LOC111366591	1652.21	0.733634	1.66282	0.123784	5.92673	3.09e-09	1.39e-08	XP_022843087.1	DExH-box_ATP-dependent_RNA_helicase_DExH14	Olive	PF02889:Sec63_Brl_domain//PF00271:Helicase_conserved_C-terminal_domain//PF00270:DEAD/DEAH_box_helicase
LOC111366607	171.368	0.69186	1.61537	0.23962	2.88732	0.00388535	0.008243	XP_022843098.1	pentatricopeptide_repeat-containing_protein_At5g15280,_mitochondrial	Olive	PF01535:PPR_repeat//PF13041:PPR_repeat_family	IPR000782:FAS1 domain//IPR036378:FAS1 domain superfamily
LOC111366608	338.194	0.929824	1.90504	0.162028	5.73867	9.54e-09	4.1e-08	XP_022843099.1	NAC_domain-containing_protein_79-like	Olive		IPR013083:Zinc finger, RING/FYVE/PHD-type//IPR001841:Zinc finger, RING-type//IPR011990:Tetratricopeptide-like helical domain superfamily//IPR017907:Zinc finger, RING-type, conserved site
LOC111366610	230.89	1.45133	2.73461	0.259407	5.59481	2.21e-08	9.17e-08	XP_022843116.1	acyl-protein_thioesterase_2-like	Olive	PF02230:Phospholipase/Carboxylesterase	IPR000626:Ubiquitin-like domain//IPR029071:Ubiquitin-like domain superfamily
LOC111366619	132.961	2.08327	4.23766	0.304255	6.84711	7.54e-12	4.12e-11	XP_022843104.1	uridylate_kinase-like	Olive	PF00696:Amino_acid_kinase_family	IPR016177:DNA-binding domain superfamily//IPR001471:AP2/ERF domain//IPR036955:AP2/ERF domain superfamily
LOC111366637	87.4734	3.74538	13.4113	0.414156	9.04342	1.52e-19	1.29e-18	XP_022843119.1	AP2-like_ethylene-responsive_transcription_factor_BBM2	Olive	PF00847:AP2_domain
LOC111366650	245.382	0.625328	1.54256	0.195271	3.20236	0.00136309	0.00312808	XP_022843132.1	centromere_protein_C-like	Olive
LOC111366663	208.564	1.5146	2.85719	0.256563	5.90341	3.56e-09	1.59e-08	XP_022843144.1	protein_NUCLEAR_FUSION_DEFECTIVE_6,_chloroplastic/mitochondrial-like	Olive
LOC111366685	220.137	1.21933	2.32838	0.207778	5.86842	4.4e-09	1.95e-08	XP_022843159.1	probable_plastidic_glucose_transporter_1	Olive	PF00083:Sugar_(and_other)_transporter
LOC111366718	542.016	0.981512	1.97453	0.157913	6.21553	5.12e-10	2.44e-09	XP_022843191.1	uncharacterized_LOC111366718	Olive	PF07460:NUMOD3_motif_(2_copies)
LOC111366744	1258.22	1.8176	3.52496	0.124521	14.5968	2.94e-48	6.82e-47	XP_022843213.1	ethylene-responsive_transcription_factor_RAP2-12-like	Olive	PF00847:AP2_domain	IPR036852:Peptidase S8/S53 domain superfamily//IPR037045:Peptidase S8 propeptide/proteinase inhibitor I9 superfamily//IPR034197:Cucumisin-like catalytic domain//IPR023828:Peptidase S8, subtilisin, Ser-active site//IPR015500:Peptidase S8, subtilisin-related
LOC111366748	146.152	1.99917	3.9977	0.28157	7.10009	1.25e-12	7.18e-12		probable_polyamine_transporter_At3g13620	Olive
LOC111366760	2510.04	0.80335	1.74515	0.153058	5.24867	1.53e-07	5.85e-07	XP_022843225.1	O-fucosyltransferase_39-like	Olive	PF10250:GDP-fucose_protein_O-fucosyltransferase	IPR011598:Myc-type, basic helix-loop-helix (bHLH) domain//IPR036638:Helix-loop-helix DNA-binding domain superfamily
LOC111366763	1241.45	1.87759	3.6746	0.121807	15.4144	1.31e-53	3.46e-52		pollen_allergen_Che_a_1-like	Olive		IPR006447:Myb domain, plants//IPR009057:Homeobox-like domain superfamily//IPR017930:Myb domain
LOC111366776	420.096	0.896094	1.86102	0.171332	5.23015	1.69e-07	6.44e-07	XP_022843240.1	nicastrin-like	Olive	PF18266:Nicastrin_small_lobe//PF05450:Nicastrin
LOC111366783	290.05	0.604045	1.51997	0.167479	3.6067	0.000310111	0.000788369	XP_022843246.1	probable_serine/threonine-protein_kinase_At4g35230	Olive	PF07714:Protein_tyrosine_kinase
LOC111366806	722.784	0.863438	1.81937	0.139054	6.20938	5.32e-10	2.54e-09	XP_022843270.1	protein_CELLULOSE_SYNTHASE_INTERACTIVE_1-like	Olive	PF00514:Armadillo/beta-catenin-like_repeat
LOC111366809	262.721	1.13466	2.19567	0.181864	6.23907	4.4e-10	2.11e-09	XP_022843272.1	subtilisin-like_protease_SBT1.7	Olive	PF05922:Peptidase_inhibitor_I9//PF17766:Fibronectin_type-III_domain//PF00082:Subtilase_family	IPR020846:Major facilitator superfamily domain//IPR036259:MFS transporter superfamily
LOC111366812	1210.93	0.43882	1.35549	0.158917	2.76132	0.00575689	0.0118496	XP_022843276.1	protein_ACTIVITY_OF_BC1_COMPLEX_KINASE_8,_chloroplastic-like	Olive	PF03109:ABC1_family
LOC111366817	83.7874	2.44057	5.42856	0.340457	7.1685	7.58e-13	4.42e-12	XP_022843280.1	ribonucleoside-diphosphate_reductase_large_subunit-like	Olive	PF00317:Ribonucleotide_reductase,_all-alpha_domain//PF02867:Ribonucleotide_reductase,_barrel_domain//PF03477:ATP_cone_domain	IPR036291:NAD(P)-binding domain superfamily
LOC111366825	133.638	0.629096	1.5466	0.260147	2.41824	0.0155959	0.0293956	XP_022843289.1	serine/threonine-protein_kinase_RIPK-like	Olive	PF07714:Protein_tyrosine_kinase
LOC111366828	310.771	1.33036	2.51465	0.316997	4.19676	2.71e-05	7.96e-05	XP_022843291.1	SAL1_phosphatase-like	Olive	PF00459:Inositol_monophosphatase_family	IPR027417:P-loop containing nucleoside triphosphate hydrolase//IPR003593:AAA+ ATPase domain//IPR003960:ATPase, AAA-type, conserved site
LOC111366829	350.003	1.75748	3.38108	0.214609	8.18923	2.63e-16	1.89e-15	XP_022843292.1	DNA_polymerase_delta_catalytic_subunit	Olive	PF03104:DNA_polymerase_family_B,_exonuclease_domain//PF00136:DNA_polymerase_family_B	IPR020052:Ribosomal protein L31e, conserved site//IPR000054:Ribosomal protein L31e//IPR023621:Ribosomal protein L31e domain superfamily
LOC111366862	252.705	0.809772	1.75293	0.181892	4.45195	8.51e-06	2.67e-05	XP_022843318.1	protein_SEH1	Olive	PF00400:WD_domain,_G-beta_repeat	IPR013785:Aldolase-type TIM barrel
LOC111366877	245.854	0.571227	1.48579	0.183185	3.11831	0.0018189	0.0040849	XP_022843331.1	protein_PAF1_homolog	Olive
LOC111366880	991.317	0.638279	1.55647	0.132025	4.83455	1.33e-06	4.62e-06	XP_022843334.1	ABC_transporter_G_family_member_35-like	Olive	PF00005:ABC_transporter//PF01061:ABC-2_type_transporter//PF14510:ABC-transporter_N-terminal	IPR029058:Alpha/Beta hydrolase fold
LOC111366888	88.4809	0.760292	1.69383	0.321272	2.36651	0.0179568	0.0333723	XP_022843341.1	uncharacterized_LOC111366888	Olive		IPR012173:U3 small nucleolar ribonucleoprotein complex, subunit Mpp10
LOC111366901	1151.77	0.59119	1.50649	0.147971	3.99532	6.46e-05	0.000181053	XP_022843350.1	floral_homeotic_protein_APETALA_2-like	Olive	PF00847:AP2_domain
LOC111366932	301.857	0.684045	1.60664	0.184832	3.7009	0.000214834	0.000559087	XP_022843383.1	uncharacterized_LOC111366932	Olive		IPR010994:RuvA domain 2-like//IPR006166:ERCC4 domain//IPR011335:Restriction endonuclease type II-like
LOC111366941	61.5344	0.947539	1.92858	0.411423	2.30308	0.0212744	0.038925	XP_022843389.1	probable_calcium-binding_protein_CML30	Olive	PF13499:EF-hand_domain_pair	IPR022357:Major intrinsic protein, conserved site//IPR000425:Major intrinsic protein//IPR023271:Aquaporin-like
LOC111366947	285.202	0.530341	1.44427	0.190921	2.7778	0.00547287	0.0113176	XP_022843395.1	pectinesterase_1-like	Olive	PF04043:Plant_invertase/pectin_methylesterase_inhibitor	IPR006476:Conserved hypothetical protein CHP01589, plant
LOC111366958	80.4373	2.0292	4.08178	0.416775	4.86882	1.12e-06	3.92e-06	XP_022843404.1	recQ-mediated_genome_instability_protein_1	Olive	PF16099:Recq-mediated_genome_instability_protein_1,_C-terminal_OB-fold//PF08585:RecQ_mediated_genome_instability_protein	IPR004696:Triose phosphate/phosphoenolpyruvate translocator
LOC111366966	53.7178	2.22272	4.66774	0.492121	4.51662	6.28e-06	2e-05	XP_022843414.1	uncharacterized_LOC111366966	Olive	PF10551:MULE_transposase_domain
LOC111366967	243.721	1.05071	2.07155	0.239626	4.38479	1.16e-05	3.58e-05	XP_022843417.1	E3_ubiquitin-protein_ligase_RNF5-like	Olive	PF00097:Zinc_finger,_C3HC4_type_(RING_finger)	IPR017853:Glycoside hydrolase superfamily//IPR014756:Immunoglobulin E-set//IPR006047:Glycosyl hydrolase, family 13, catalytic domain//IPR037439:1,4-alpha-glucan-branching enzyme//IPR013780:Glycosyl hydrolase, all-beta//IPR013783:Immunoglobulin-like fold
LOC111366985	103.89	1.74088	3.34239	0.285223	6.10358	1.04e-09	4.84e-09	XP_022843429.1	uncharacterized_LOC111366985	Olive		IPR029071:Ubiquitin-like domain superfamily
LOC111366996	59.1008	0.803829	1.74573	0.341749	2.35211	0.0186674	0.0345593	XP_022843441.1	uncharacterized_LOC111366996	Olive	PF00300:Histidine_phosphatase_superfamily_(branch_1)	IPR032675:Leucine-rich repeat domain superfamily
LOC111367001	215.28	0.610498	1.52679	0.216622	2.81826	0.00482844	0.0100829		RNA-dependent_RNA_polymerase_2	Olive		IPR022697:Homoserine dehydrogenase lacking ACT domain//IPR019811:Homoserine dehydrogenase, conserved site//IPR036291:NAD(P)-binding domain superfamily
LOC111367029	542.901	0.58236	1.4973	0.139645	4.17029	3.04e-05	8.88e-05	XP_022843475.1	probable_cyclic_nucleotide-gated_ion_channel_20,_chloroplastic,_transcript_variant_X3	Olive	PF00520:Ion_transport_protein	IPR001192:Phosphoinositide phospholipase C family//IPR017946:PLC-like phosphodiesterase, TIM beta/alpha-barrel domain superfamily//IPR000008:C2 domain//IPR011992:EF-hand domain pair//IPR035892:C2 domain superfamily//IPR001711:Phospholipase C, phosphatidylinositol-specific, Y domain//IPR000909:Phosphatidylinositol-specific phospholipase C, X domain
LOC111367038	192.102	1.06152	2.08712	0.212497	4.99543	5.87e-07	2.11e-06	XP_022843492.1	probable_inactive_leucine-rich_repeat_receptor-like_protein_kinase_At3g03770,_transcript_variant_X3	Olive	PF13855:Leucine_rich_repeat//PF07714:Protein_tyrosine_kinase
LOC111367046	191.477	1.21181	2.31628	0.236023	5.13429	2.83e-07	1.05e-06	XP_022843503.1	probable_phytol_kinase_3,_chloroplastic	Olive		IPR036873:Rhodanese-like domain superfamily//IPR001763:Rhodanese-like domain
LOC111367048	125.561	1.62022	3.07422	0.297015	5.45502	4.9e-08	1.97e-07	XP_022843505.1	uncharacterized_LOC111367048	Olive	PF11820:Protein_of_unknown_function_(DUF3339)
LOC111367050	326.191	2.13261	4.3851	0.180554	11.8115	3.41e-32	4.89e-31	XP_022843508.1	probable_pectate_lyase_18,_transcript_variant_X2	Olive	PF00544:Pectate_lyase	IPR032675:Leucine-rich repeat domain superfamily//IPR003591:Leucine-rich repeat, typical subtype//IPR000719:Protein kinase domain//IPR011009:Protein kinase-like domain superfamily
LOC111367051	262.997	0.691768	1.61526	0.182585	3.78874	0.000151412	0.000402255	XP_022843529.1	uncharacterized_LOC111367051,_transcript_variant_X3	Olive
LOC111367053	598.594	0.768209	1.70315	0.147926	5.19319	2.07e-07	7.79e-07	XP_022843511.1	mitochondrial_import_inner_membrane_translocase_subunit_TIM50-like,_transcript_variant_X2	Olive	PF03031:NLI_interacting_factor-like_phosphatase
LOC111367054	217.791	1.34141	2.53399	0.225464	5.94957	2.69e-09	1.21e-08	XP_022843513.1	zinc_transporter_11-like	Olive	PF02535:ZIP_Zinc_transporter	IPR014347:Tautomerase/MIF superfamily
LOC111367055	495.092	1.79006	3.45829	0.168709	10.6104	2.67e-26	3.05e-25	XP_022843514.1	30S_ribosomal_protein_S10,_chloroplastic-like	Olive	PF00338:Ribosomal_protein_S10p/S20e	IPR013820:ATP phosphoribosyltransferase, catalytic domain//IPR018198:ATP phosphoribosyltransferase, conserved site
LOC111367059	258.951	0.414911	1.33322	0.188048	2.20641	0.0273556	0.0486533		scarecrow-like_protein_5	Olive		IPR027417:P-loop containing nucleoside triphosphate hydrolase
LOC111367060	173.042	3.02743	8.15359	0.287697	10.523	6.77e-26	7.61e-25	XP_022843524.1	kinesin-like_protein_KIN-12F,_transcript_variant_X2	Olive	PF00225:Kinesin_motor_domain	IPR035952:Rhomboid-like superfamily
LOC111367070	101.966	0.792669	1.73228	0.342578	2.31384	0.0206767	0.0379097	XP_022843538.1	sirohydrochlorin_ferrochelatase,_chloroplastic,_transcript_variant_X2	Olive	PF01903:CbiX	IPR001005:SANT/Myb domain//IPR009462:Domain of unknown function DUF1086
LOC111367073	287.766	0.459001	1.37459	0.187361	2.44982	0.0142928	0.0271862	XP_022843541.1	tRNA_(adenine(58)-N(1))-methyltransferase_catalytic_subunit_TRMT61A,_transcript_variant_X2	Olive	PF08704:tRNA_methyltransferase_complex_GCD14_subunit	IPR036322:WD40-repeat-containing domain superfamily//IPR001680:WD40 repeat//IPR017986:WD40-repeat-containing domain//IPR015943:WD40/YVTN repeat-like-containing domain superfamily
LOC111367077	197.36	1.43691	2.70741	0.230837	6.22479	4.82e-10	2.31e-09	XP_022843546.1	rac-like_GTP-binding_protein_5	Olive	PF00071:Ras_family	IPR036298:Chalcone isomerase superfamily
LOC111367078	541.136	0.917373	1.88867	0.214731	4.2722	1.94e-05	5.79e-05	XP_022843547.1	tubulin-folding_cofactor_A	Olive	PF02970:Tubulin_binding_cofactor_A	IPR001683:Phox homologous domain//IPR003114:Phox-associated domain//IPR036871:PX domain superfamily
LOC111367084	116.739	1.91296	3.76581	0.288664	6.62695	3.43e-11	1.79e-10	XP_022843558.1	palmitoyl-protein_thioesterase_1-like,_transcript_variant_X3	Olive	PF02089:Palmitoyl_protein_thioesterase	IPR027417:P-loop containing nucleoside triphosphate hydrolase//IPR017231:Small GTPase Tem1/Spg1
LOC111367088	134.361	1.96426	3.90213	0.351071	5.59506	2.21e-08	9.16e-08	XP_022843566.1	ribonuclease_J-like	Olive	PF12706:Beta-lactamase_superfamily_domain	IPR027417:P-loop containing nucleoside triphosphate hydrolase//IPR019489:Clp ATPase, C-terminal//IPR036628:Clp, N-terminal domain superfamily//IPR017730:Chaperonin ClpB//IPR003593:AAA+ ATPase domain//IPR018368:ClpA/B, conserved site 1//IPR001270:ClpA/B family//IPR028299:ClpA/B, conserved site 2
LOC111367089	187.018	2.75621	6.75618	0.25087	10.9866	4.43e-28	5.49e-27	XP_022843567.1	PLASMODESMATA_CALLOSE-BINDING_PROTEIN_2-like	Olive	PF07983:X8_domain	IPR019775:WD40 repeat, conserved site//IPR001680:WD40 repeat//IPR015943:WD40/YVTN repeat-like-containing domain superfamily//IPR036322:WD40-repeat-containing domain superfamily//IPR017986:WD40-repeat-containing domain//IPR011043:Galactose oxidase/kelch, beta-propeller
LOC111367090	151.647	2.36572	5.15409	0.263487	8.9785	2.74e-19	2.3e-18	XP_022843568.1	PLASMODESMATA_CALLOSE-BINDING_PROTEIN_3-like	Olive	PF07983:X8_domain	IPR017907:Zinc finger, RING-type, conserved site//IPR013083:Zinc finger, RING/FYVE/PHD-type//IPR001841:Zinc finger, RING-type
LOC111367091	607.195	1.20473	2.30494	0.134883	8.93167	4.2e-19	3.49e-18	XP_022843570.1	4-coumarate--CoA_ligase-like_9,_transcript_variant_X2	Olive	PF00501:AMP-binding_enzyme	IPR002885:Pentatricopeptide repeat//IPR011990:Tetratricopeptide-like helical domain superfamily
LOC111367095	65.1599	1.48484	2.79886	0.489749	3.03184	0.0024307	0.00534503	XP_022843573.1	protein_PLASTID_TRANSCRIPTIONALLY_ACTIVE_10-like	Olive		IPR036961:Kinesin motor domain superfamily//IPR027417:P-loop containing nucleoside triphosphate hydrolase//IPR001752:Kinesin motor domain//IPR019821:Kinesin motor domain, conserved site
LOC111367101	152.908	1.90384	3.74209	0.280908	6.77747	1.22e-11	6.59e-11		uncharacterized_LOC111367101	Olive		IPR025605:OST-HTH/LOTUS domain//IPR041966:LOTUS-like domain
LOC111367106	56.6628	1.37024	2.58514	0.362911	3.7757	0.000159559	0.000422696	XP_022843589.1	RING-H2_finger_protein_ATL47-like	Olive	PF13639:Ring_finger_domain
LOC111367116	281.358	0.649268	1.56837	0.246498	2.63396	0.00843943	0.0168303	XP_022843610.1	rhodanese-like_domain-containing_protein_11,_chloroplastic,_transcript_variant_X4	Olive	PF00581:Rhodanese-like_domain	IPR027417:P-loop containing nucleoside triphosphate hydrolase//IPR036891:Signal recognition particle, SRP54 subunit, M-domain superfamily//IPR006325:Signal recognition particle, SRP54 subunit, eukaryotic//IPR022941:Signal recognition particle, SRP54 subunit//IPR036225:SRP/SRP receptor, N-terminal//IPR042101:Signal recognition particle SRP54, N-terminal domain superfamily//IPR013822:Signal recogni…
LOC111367117	1179.42	0.708186	1.63375	0.11219	6.31239	2.75e-10	1.34e-09	XP_022843612.1	E3_ubiquitin-protein_ligase_RGLG2-like,_transcript_variant_X2	Olive	PF07002:Copine//PF13920:Zinc_finger,_C3HC4_type_(RING_finger)
LOC111367118	954.155	0.59214	1.50748	0.131351	4.50807	6.54e-06	2.08e-05	XP_022843613.1	protein_SIEVE_ELEMENT_OCCLUSION_B-like	Olive	PF14576:Sieve_element_occlusion_N-terminus//PF14577:Sieve_element_occlusion_C-terminus	IPR036638:Helix-loop-helix DNA-binding domain superfamily//IPR011598:Myc-type, basic helix-loop-helix (bHLH) domain
LOC111367121	141.748	1.13088	2.18992	0.246593	4.586	4.52e-06	1.46e-05	XP_022843617.1	ethylene-responsive_transcription_factor_ERF107-like	Olive	PF00847:AP2_domain
LOC111367130	296.353	0.765277	1.6997	0.173168	4.41928	9.9e-06	3.08e-05	XP_022843623.1	F-box/kelch-repeat_protein_At1g51550-like,_transcript_variant_X2	Olive	PF13418:Galactose_oxidase,_central_domain//PF13415:Galactose_oxidase,_central_domain
LOC111367137	174.402	2.4563	5.48808	0.242977	10.1092	5.03e-24	5.24e-23		uncharacterized_LOC111367137,_transcript_variant_X4	Olive
LOC111367142	329.875	1.40778	2.65328	0.218194	6.45195	1.1e-10	5.56e-10	XP_022843638.1	60S_ribosomal_protein_L34-like	Olive	PF01199:Ribosomal_protein_L34e	IPR002885:Pentatricopeptide repeat//IPR011990:Tetratricopeptide-like helical domain superfamily
LOC111367145	2664.66	1.13753	2.20004	0.127662	8.91045	5.08e-19	4.21e-18	XP_022843643.1	60S_ribosomal_protein_L7-4-like,_transcript_variant_X2	Olive	PF08079:Ribosomal_L30_N-terminal_domain//PF00327:Ribosomal_protein_L30p/L7e	IPR017871:ABC transporter, conserved site//IPR003593:AAA+ ATPase domain//IPR003439:ABC transporter-like//IPR027417:P-loop containing nucleoside triphosphate hydrolase
LOC111367154	642.855	1.03797	2.05333	0.145886	7.11493	1.12e-12	6.47e-12	XP_022843651.1	auxin-responsive_protein_IAA27-like	Olive	PF02309:AUX/IAA_family
LOC111367157	1963.4	2.19266	4.57147	0.142246	15.4146	1.31e-53	3.45e-52	XP_022843658.1	photosystem_I_reaction_center_subunit_VI,_chloroplastic-like	Olive	PF03244:Photosystem_I_reaction_centre_subunit_VI
LOC111367168	284.455	0.75487	1.68748	0.184121	4.09985	4.13e-05	0.000118853	XP_022843672.1	UPF0301_protein_Tfu_2389-like	Olive	PF02622:Uncharacterized_ACR,_COG1678	IPR036400:Cytochrome b5-like heme/steroid binding domain superfamily//IPR001199:Cytochrome b5-like heme/steroid binding domain
LOC111367177	266.571	0.464045	1.3794	0.176286	2.63234	0.00847997	0.0169021	XP_022843689.1	zinc_finger_RNA-binding_protein-like	Olive	PF12874:Zinc-finger_of_C2H2_type	IPR038538:MTERF superfamily, mitochondrial/chloroplastic//IPR003690:Transcription termination factor, mitochondrial/chloroplastic
LOC111367180	150.507	2.2516	4.76212	0.263456	8.54641	1.27e-17	9.84e-17	XP_022843692.1	targeting_protein_for_Xklp2-A-like	Olive	PF06886:Targeting_protein_for_Xklp2_(TPX2)
LOC111367182	142.897	0.773314	1.70919	0.238851	3.23764	0.00120521	0.00279034	XP_022843694.1	40S_ribosomal_protein_S19-3	Olive	PF01090:Ribosomal_protein_S19e	IPR001841:Zinc finger, RING-type//IPR013083:Zinc finger, RING/FYVE/PHD-type
LOC111367183	708.945	1.81414	3.5165	0.140705	12.8932	4.92e-38	8.41e-37	XP_022843699.1	uncharacterized_LOC111367183	Olive	PF06075:Plant_protein_of_unknown_function_(DUF936)
LOC111367186	1339.41	1.17327	2.25522	0.121402	9.66432	4.27e-22	4.1e-21	XP_022843700.1	uncharacterized_LOC111367186,_transcript_variant_X2	Olive		IPR029063:S-adenosyl-L-methionine-dependent methyltransferase
LOC111367188	2089.9	3.27796	9.69985	0.133734	24.511	1.13e-132	1.08e-130	XP_022843702.1	vegetative_cell_wall_protein_gp1-like	Olive	PF01190:Pollen_proteins_Ole_e_I_like
LOC111367190	417.839	0.943519	1.92321	0.250078	3.7729	0.00016136	0.000427232	XP_022843708.1	uncharacterized_protein_YwbO,_transcript_variant_X3	Olive	PF01323:DSBA-like_thioredoxin_domain	IPR000719:Protein kinase domain//IPR008271:Serine/threonine-protein kinase, active site//IPR017441:Protein kinase, ATP binding site//IPR011009:Protein kinase-like domain superfamily//IPR000270:PB1 domain//IPR001245:Serine-threonine/tyrosine-protein kinase, catalytic domain
LOC111367194	233.988	1.57127	2.97166	0.23474	6.69365	2.18e-11	1.15e-10	XP_022843712.1	non-functional_pseudokinase_ZED1-like	Olive	PF07714:Protein_tyrosine_kinase	IPR012677:Nucleotide-binding alpha-beta plait domain superfamily//IPR035979:RNA-binding domain superfamily//IPR000504:RNA recognition motif domain//IPR034143:snRNP70, RNA recognition motif
LOC111367195	379.272	0.48333	1.39797	0.1606	3.00952	0.00261663	0.00572283	XP_022843714.1	F-box/FBD/LRR-repeat_protein_At1g13570-like,_transcript_variant_X2	Olive	PF00646:F-box_domain
LOC111367198	457.171	1.00322	2.00447	0.169526	5.91781	3.26e-09	1.46e-08	XP_022843724.1	uncharacterized_LOC111367198	Olive	PF10358:N-terminal_C2_in_EEIG1_and_EHBP1_proteins
LOC111367200	565.773	0.581632	1.49654	0.166937	3.48413	0.000493734	0.00121478	XP_022843722.1	chromatin_assembly_factor_1_subunit_FAS2	Olive	PF12894:Anaphase-promoting_complex_subunit_4_WD40_domain//PF00400:WD_domain,_G-beta_repeat
LOC111367202	131.369	2.28249	4.86517	0.284132	8.03321	9.5e-16	6.62e-15	XP_022843725.1	protein_IRX15-LIKE-like	Olive	PF04669:Polysaccharide_biosynthesis	IPR036412:HAD-like superfamily//IPR006549:HAD-superfamily hydrolase,subfamily IIIA//IPR023214:HAD superfamily//IPR010021:HAD-superfamily phosphatase, YqeG-like
LOC111367203	604.435	0.592175	1.50752	0.137256	4.31438	1.6e-05	4.84e-05	XP_022843726.1	probable_WRKY_transcription_factor_7	Olive	PF03106:WRKY_DNA_-binding_domain//PF10533:Plant_zinc_cluster_domain	IPR029058:Alpha/Beta hydrolase fold
LOC111367206	127.129	1.34548	2.54115	0.282213	4.76762	1.86e-06	6.36e-06		uncharacterized_LOC111367206,_transcript_variant_X9	Olive		IPR033922:NAD(P) binding domain of glutamate dehydrogenase//IPR006095:Glutamate/phenylalanine/leucine/valine dehydrogenase//IPR006096:Glutamate/phenylalanine/leucine/valine dehydrogenase, C-terminal//IPR036291:NAD(P)-binding domain superfamily//IPR014362:Glutamate dehydrogenase//IPR033524:Leu/Phe/Val dehydrogenases active site
LOC111367209	1994.34	0.541832	1.45582	0.175369	3.08968	0.00200375	0.00447107	XP_022843732.1	cyclin-D3-3-like	Olive	PF00134:Cyclin,_N-terminal_domain//PF02984:Cyclin,_C-terminal_domain	IPR036885:SWIB/MDM2 domain superfamily//IPR019835:SWIB domain
LOC111367211	568.623	0.629905	1.54746	0.149981	4.19991	2.67e-05	7.86e-05	XP_022843734.1	probable_cadmium/zinc-transporting_ATPase_HMA1,_chloroplastic	Olive	PF00122:E1-E2_ATPase//PF00702:haloacid_dehalogenase-like_hydrolase	IPR000682:Protein-L-isoaspartate(D-aspartate) O-methyltransferase//IPR029063:S-adenosyl-L-methionine-dependent methyltransferase
LOC111367217	175.275	0.685919	1.60873	0.252938	2.7118	0.0066918	0.013609	XP_022843742.1	probable_receptor-like_protein_kinase_At5g24010	Olive	PF12819:Malectin-like_domain//PF07714:Protein_tyrosine_kinase
LOC111367218	253.022	0.538119	1.45208	0.213936	2.51533	0.0118921	0.0230129	XP_022843743.1	probable_receptor-like_protein_kinase_At5g24010	Olive	PF07714:Protein_tyrosine_kinase//PF12819:Malectin-like_domain
LOC111367224	247.124	0.784105	1.72202	0.205595	3.81383	0.000136829	0.000365679	XP_022843758.1	probable_glutamate_carboxypeptidase_AMP1,_transcript_variant_X2	Olive	PF04253:Transferrin_receptor-like_dimerisation_domain//PF04389:Peptidase_family_M28
LOC111367225	1445.91	1.55944	2.9474	0.125837	12.3925	2.87e-35	4.52e-34	XP_022843749.1	lysine-rich_arabinogalactan_protein_18-like,_transcript_variant_X2	Olive		IPR016024:Armadillo-type fold//IPR013083:Zinc finger, RING/FYVE/PHD-type//IPR003613:U box domain//IPR011989:Armadillo-like helical
LOC111367229	237.412	1.00965	2.01343	0.218094	4.62944	3.67e-06	1.2e-05	XP_022843754.1	ribonuclease_III_domain-containing_protein_RNC1,_chloroplastic	Olive		IPR002123:Phospholipid/glycerol acyltransferase
LOC111367230	679.282	1.15721	2.23026	0.150432	7.69258	1.44e-14	9.41e-14	XP_022843755.1	BTB/POZ_domain-containing_protein_At5g67385-like	Olive	PF03000:NPH3_family//PF00651:BTB/POZ_domain	IPR020831:Glyceraldehyde/Erythrose phosphate dehydrogenase family//IPR036291:NAD(P)-binding domain superfamily//IPR006424:Glyceraldehyde-3-phosphate dehydrogenase, type I//IPR020828:Glyceraldehyde 3-phosphate dehydrogenase, NAD(P) binding domain//IPR020830:Glyceraldehyde 3-phosphate dehydrogenase, active site
LOC111367231	541.303	1.77133	3.41369	0.157842	11.2222	3.17e-29	4.09e-28	XP_022843756.1	uncharacterized_LOC111367231	Olive		IPR029045:ClpP/crotonase-like domain superfamily
LOC111367242	589.637	0.383951	1.30491	0.155123	2.47514	0.0133183	0.0254841	XP_022843774.1	formin-like_protein_6	Olive	PF02181:Formin_Homology_2_Domain	IPR029063:S-adenosyl-L-methionine-dependent methyltransferase
LOC111367248	878.569	0.626892	1.54423	0.128318	4.88547	1.03e-06	3.62e-06	XP_022843779.1	60S_ribosomal_protein_L26-1	Olive	PF00467:KOW_motif//PF16906:Ribosomal_proteins_L26_eukaryotic,_L24P_archaeal
LOC111367252	278.612	0.789603	1.7286	0.253633	3.11317	0.0018509	0.00415233	XP_022843796.1	EEF1A_lysine_methyltransferase_1,_transcript_variant_X2	Olive	PF10237:Probable_N6-adenine_methyltransferase	IPR000719:Protein kinase domain//IPR008271:Serine/threonine-protein kinase, active site//IPR017441:Protein kinase, ATP binding site//IPR011009:Protein kinase-like domain superfamily
LOC111367254	496.742	0.627063	1.54442	0.189461	3.30973	0.000933876	0.00220262	XP_022843793.1	single_myb_histone_1-like,_transcript_variant_X9	Olive	PF00249:Myb-like_DNA-binding_domain//PF00538:linker_histone_H1_and_H5_family
LOC111367264	108.8	2.24987	4.7564	0.299785	7.50493	6.15e-14	3.84e-13	XP_022843808.1	uncharacterized_LOC111367264,_transcript_variant_X5	Olive	PF00010:Helix-loop-helix_DNA-binding_domain
LOC111367265	98.1669	0.830209	1.77794	0.324976	2.55468	0.0106287	0.0207568	XP_022843809.1	inactive_LRR_receptor-like_serine/threonine-protein_kinase_BIR2	Olive	PF00560:Leucine_Rich_Repeat	IPR013763:Cyclin-like//IPR004367:Cyclin, C-terminal domain//IPR036915:Cyclin-like superfamily//IPR006671:Cyclin, N-terminal
LOC111367267	364.038	0.395863	1.31573	0.17329	2.2844	0.0223478	0.0406325	XP_022843813.1	pentatricopeptide_repeat-containing_protein_At3g49730-like,_transcript_variant_X9	Olive	PF13041:PPR_repeat_family//PF01535:PPR_repeat//PF12854:PPR_repeat	IPR036164:L21-like superfamily//IPR001787:Ribosomal protein L21//IPR018258:Ribosomal protein L21, conserved site
LOC111367271	727.583	1.5738	2.97688	0.266597	5.90329	3.56e-09	1.59e-08	XP_022843816.1	branched-chain_amino_acid_aminotransferase_2,_chloroplastic-like	Olive	PF01063:Amino-transferase_class_IV
LOC111367274	421.713	0.694503	1.61833	0.171754	4.0436	5.26e-05	0.000149345	XP_022843819.1	lysosomal_Pro-X_carboxypeptidase	Olive	PF05577:Serine_carboxypeptidase_S28	IPR029058:Alpha/Beta hydrolase fold//IPR033140:Lipase, GDXG, putative serine active site
LOC111367280	140.888	1.03369	2.04725	0.358111	2.8865	0.00389557	0.00826365	XP_022843829.1	40S_ribosomal_protein_S15a-2-like	Olive	PF00410:Ribosomal_protein_S8	IPR003657:WRKY domain//IPR036576:WRKY domain superfamily
LOC111367281	2850.32	0.666841	1.58759	0.105641	6.31232	2.75e-10	1.34e-09	XP_022843830.1	60S_ribosomal_protein_L28-2-like	Olive	PF01778:Ribosomal_L28e_protein_family	IPR027417:P-loop containing nucleoside triphosphate hydrolase
LOC111367282	452.607	0.622352	1.53938	0.189201	3.28936	0.00100415	0.002355	XP_022843834.1	RWD_domain-containing_protein_1,_transcript_variant_X2	Olive	PF05773:RWD_domain	IPR002133:S-adenosylmethionine synthetase//IPR022631:S-adenosylmethionine synthetase, conserved site//IPR022636:S-adenosylmethionine synthetase superfamily
LOC111367283	157.407	1.7802	3.43473	0.237079	7.50889	5.96e-14	3.73e-13	XP_022843835.1	uncharacterized_RNA_methyltransferase_BT_0643,_transcript_variant_X3	Olive	PF05958:tRNA_(Uracil-5-)-methyltransferase
LOC111367291	606.479	2.68211	6.41793	0.598242	4.48332	7.35e-06	2.32e-05	XP_022843858.1	inositol_oxygenase_1-like	Olive	PF05153:Myo-inositol_oxygenase
LOC111367294	236.668	1.11415	2.16468	0.190723	5.84173	5.17e-09	2.28e-08	XP_022843869.1	nucleolar_and_coiled-body_phosphoprotein_1-like	Olive	PF05022:SRP40,_C-terminal_domain
LOC111367306	71.3161	0.94703	1.9279	0.378217	2.50393	0.0122821	0.0237036	XP_022843884.1	tyrosine-sulfated_glycopeptide_receptor_1-like	Olive	PF08263:Leucine_rich_repeat_N-terminal_domain//PF13855:Leucine_rich_repeat
LOC111367308	56.3483	1.04972	2.07013	0.384533	2.72987	0.00633601	0.0129426	XP_022843886.1	uncharacterized_LOC111367308	Olive	PF10173:Mitochondrial_K+-H+_exchange-related	IPR038595:LURP-one-related superfamily//IPR025659:Tubby-like, C-terminal
LOC111367309	474.611	1.29229	2.44916	0.148806	8.68438	3.81e-18	3.02e-17	XP_022843887.1	O-fucosyltransferase_36-like	Olive	PF10250:GDP-fucose_protein_O-fucosyltransferase	IPR001736:Phospholipase D/Transphosphatidylase//IPR035892:C2 domain superfamily//IPR000008:C2 domain//IPR011402:Phospholipase D, plant
LOC111367317	81.3837	1.09337	2.13372	0.298976	3.65704	0.000255145	0.000655922	XP_022843897.1	alanine_aminotransferase_2-like	Olive	PF00155:Aminotransferase_class_I_and_II	IPR034751:Yippee domain
LOC111367320	99.758	1.5851	3.00028	0.321833	4.92521	8.43e-07	2.98e-06	XP_022843899.1	uncharacterized_LOC111367320,_transcript_variant_X2	Olive		IPR017441:Protein kinase, ATP binding site//IPR011009:Protein kinase-like domain superfamily//IPR000719:Protein kinase domain//IPR008271:Serine/threonine-protein kinase, active site
LOC111367325	552.282	1.19325	2.28668	0.150938	7.9056	2.67e-15	1.81e-14	XP_022843905.1	bifunctional_aspartokinase/homoserine_dehydrogenase,_chloroplastic-like	Olive	PF01842:ACT_domain//PF00696:Amino_acid_kinase_family//PF00742:Homoserine_dehydrogenase//PF03447:Homoserine_dehydrogenase,_NAD_binding_domain//PF13840:ACT_domain	IPR036638:Helix-loop-helix DNA-binding domain superfamily//IPR011598:Myc-type, basic helix-loop-helix (bHLH) domain
LOC111367330	476.231	2.54396	5.83188	0.165103	15.4084	1.44e-53	3.79e-52	XP_022843916.1	DNA_polymerase_alpha_catalytic_subunit,_transcript_variant_X2	Olive	PF03104:DNA_polymerase_family_B,_exonuclease_domain//PF12254:DNA_polymerase_alpha_subunit_p180_N_terminal//PF00136:DNA_polymerase_family_B//PF08996:DNA_Polymerase_alpha_zinc_finger
LOC111367334	122.672	1.1344	2.19527	0.249948	4.53853	5.66e-06	1.81e-05	XP_022843919.1	boron_transporter_4-like	Olive	PF00955:HCO3-_transporter_family
LOC111367341	2408.88	0.595986	1.51151	0.131628	4.52779	5.96e-06	1.9e-05	XP_022843924.1	B-box_zinc_finger_protein_24-like	Olive	PF00643:B-box_zinc_finger
LOC111367342	956.214	0.497281	1.41155	0.120567	4.12453	3.71e-05	0.000107418	XP_022843927.1	SAC3_family_protein_B	Olive	PF03399:SAC3/GANP_family
LOC111367345	148.573	1.19465	2.28889	0.244412	4.88785	1.02e-06	3.58e-06	XP_022843928.1	uncharacterized_LOC111367345,_transcript_variant_X2	Olive	PF12049:Protein_of_unknown_function_(DUF3531)
LOC111367346	1613.25	0.315737	1.24465	0.125857	2.50869	0.0121181	0.02341	XP_022843929.1	hydroxyacylglutathione_hydrolase_1,_mitochondrial-like	Olive	PF16123:Hydroxyacylglutathione_hydrolase_C-terminus//PF00753:Metallo-beta-lactamase_superfamily	IPR000504:RNA recognition motif domain//IPR035979:RNA-binding domain superfamily//IPR012677:Nucleotide-binding alpha-beta plait domain superfamily//IPR002004:Polyadenylate-binding protein/Hyperplastic disc protein//IPR003954:RNA recognition motif domain, eukaryote//IPR036053:PABC (PABP) domain//IPR006515:Polyadenylate binding protein, human types 1, 2, 3, 4
LOC111367362	1671.99	0.694551	1.61838	0.153452	4.52619	6.01e-06	1.92e-05	XP_022843952.1	protease_Do-like_7,_transcript_variant_X2	Olive	PF13365:Trypsin-like_peptidase_domain//PF13180:PDZ_domain//PF12812:PDZ-like_domain	IPR006458:Ovate protein family, C-terminal
LOC111367365	50.8687	0.968094	1.95625	0.412488	2.34696	0.0189271	0.0350015	XP_022843956.1	uncharacterized_LOC111367365,_transcript_variant_X2	Olive
LOC111367373	225.001	0.679176	1.60123	0.205165	3.3104	0.000931632	0.00219764	XP_022843977.1	uncharacterized_LOC111367373,_transcript_variant_X4	Olive	PF12874:Zinc-finger_of_C2H2_type	IPR036312:Bifunctional inhibitor/plant lipid transfer protein/seed storage helical domain superfamily//IPR000528:Plant lipid transfer protein/Par allergen//IPR016140:Bifunctional inhibitor/plant lipid transfer protein/seed storage helical domain
LOC111367374	233.919	0.567062	1.4815	0.248955	2.27777	0.02274	0.0412586	XP_022843978.1	histone_chaperone_ASF1B	Olive	PF04729:ASF1_like_histone_chaperone
LOC111367376	84.7595	1.29562	2.45482	0.297131	4.36042	1.3e-05	3.97e-05	XP_022843982.1	uncharacterized_LOC111367376,_transcript_variant_X5	Olive		IPR027483:Phosphatidylinositol-4-phosphate 5-kinase, C-terminal//IPR002498:Phosphatidylinositol-4-phosphate 5-kinase, core//IPR017163:Phosphatidylinositol-4-phosphate 5-kinase, plant//IPR003409:MORN motif//IPR027484:Phosphatidylinositol-4-phosphate 5-kinase, N-terminal
LOC111367379	500.676	1.39876	2.63675	0.170144	8.22102	2.02e-16	1.46e-15	XP_022843985.1	probable_LRR_receptor-like_serine/threonine-protein_kinase_At4g36180	Olive	PF00560:Leucine_Rich_Repeat//PF13855:Leucine_rich_repeat//PF08263:Leucine_rich_repeat_N-terminal_domain//PF00069:Protein_kinase_domain	IPR002498:Phosphatidylinositol-4-phosphate 5-kinase, core//IPR027483:Phosphatidylinositol-4-phosphate 5-kinase, C-terminal//IPR027484:Phosphatidylinositol-4-phosphate 5-kinase, N-terminal
LOC111367381	165.394	1.06875	2.09761	0.222907	4.79459	1.63e-06	5.6e-06	XP_022843991.1	protein_CHAPERONE-LIKE_PROTEIN_OF_POR1,_chloroplastic,_transcript_variant_X6	Olive	PF11833:Protein_CHAPERONE-LIKE_PROTEIN_OF_POR1-like
LOC111367387	188.301	1.53748	2.90288	0.239744	6.41303	1.43e-10	7.11e-10	XP_022844001.1	GATA_transcription_factor_5-like	Olive	PF00320:GATA_zinc_finger
LOC111367398	541.453	0.373562	1.29555	0.1498	2.49375	0.0126403	0.0243099	XP_022844022.1	uncharacterized_LOC111367398,_transcript_variant_X5	Olive		IPR029064:50S ribosomal protein L30e-like//IPR029028:Alpha/beta knot methyltransferases//IPR029026:tRNA (guanine-N1-)-methyltransferase, N-terminal
LOC111367409	85.2357	1.45254	2.73689	0.441953	3.28663	0.00101394	0.00237514	XP_022844034.1	CASP-like_protein_1	Olive	PF04535:Domain_of_unknown_function_(DUF588)	IPR011598:Myc-type, basic helix-loop-helix (bHLH) domain//IPR036638:Helix-loop-helix DNA-binding domain superfamily
LOC111367416	555.927	0.528563	1.44249	0.178823	2.95579	0.00311865	0.00671855	XP_022844040.1	putative_receptor_protein_kinase_ZmPK1	Olive	PF00954:S-locus_glycoprotein_domain//PF01453:D-mannose_binding_lectin//PF00069:Protein_kinase_domain	IPR001976:Ribosomal protein S24e//IPR018098:Ribosomal S24e conserved site//IPR012678:Ribosomal protein L23/L15e core domain superfamily
LOC111367417	1543.64	0.539162	1.45313	0.117889	4.57347	4.8e-06	1.55e-05	XP_022844041.1	polyadenylate-binding_protein_2-like	Olive	PF00076:RNA_recognition_motif._(a.k.a._RRM,_RBD,_or_RNP_domain)//PF00658:Poly-adenylate_binding_protein,_unique_domain	IPR029058:Alpha/Beta hydrolase fold//IPR000639:Epoxide hydrolase-like//IPR000073:Alpha/beta hydrolase fold-1
LOC111367423	362.266	0.434626	1.35156	0.161117	2.69759	0.00698439	0.0141467	XP_022844055.1	putative_disease_resistance_protein_At3g14460,_transcript_variant_X8	Olive		IPR001858:Phosphatidylethanolamine-binding, conserved site//IPR036610:PEBP-like superfamily//IPR035810:Phosphatidylethanolamine-binding protein, eukaryotic
LOC111367424	73.2297	2.80869	7.00649	0.485437	5.78591	7.21e-09	3.14e-08	XP_022844059.1	probable_serine/threonine-protein_kinase_At1g54610	Olive	PF00069:Protein_kinase_domain	IPR011009:Protein kinase-like domain superfamily//IPR000719:Protein kinase domain//IPR020635:Tyrosine-protein kinase, catalytic domain
LOC111367433	568.029	0.760261	1.6938	0.157232	4.83527	1.33e-06	4.61e-06	XP_022844072.1	putative_disease_resistance_RPP13-like_protein_1,_transcript_variant_X9	Olive	PF00931:NB-ARC_domain//PF18052:Rx_N-terminal_domain	IPR036879:Transcription factor, MADS-box superfamily//IPR002100:Transcription factor, MADS-box
LOC111367434	90.6935	3.80794	14.0057	0.43445	8.76498	1.87e-18	1.5e-17	XP_022844088.1	sodium/hydrogen_exchanger_2-like,_transcript_variant_X4	Olive	PF00999:Sodium/hydrogen_exchanger_family
LOC111367440	734.102	0.5652	1.47959	0.132555	4.26388	2.01e-05	6e-05	XP_022844091.1	putative_disease_resistance_RPP13-like_protein_1,_transcript_variant_X9	Olive	PF18052:Rx_N-terminal_domain//PF00931:NB-ARC_domain	IPR013020:ATP-dependent helicase Rad3/Chl1-like//IPR027417:P-loop containing nucleoside triphosphate hydrolase//IPR014013:Helicase superfamily 1/2, ATP-binding domain, DinG/Rad3-type//IPR006555:ATP-dependent helicase, C-terminal//IPR006554:Helicase-like, DEXD box c2 type
LOC111367450	104.843	1.0291	2.04074	0.269035	3.82513	0.000130701	0.000350247			Olive
LOC111367453	353.211	0.772447	1.70817	0.175695	4.39653	1.1e-05	3.4e-05	XP_022844104.1	26S_proteasome_non-ATPase_regulatory_subunit_2_homolog_A-like,_transcript_variant_X5	Olive	PF17781:RPN1/RPN2_N-terminal_domain
LOC111367454	74.1485	1.28015	2.42865	0.338679	3.77985	0.000156922	0.000416105	XP_022844105.1	tyrosine_aminotransferase-like	Olive	PF00155:Aminotransferase_class_I_and_II	IPR017853:Glycoside hydrolase superfamily
LOC111367460	80.6058	0.819866	1.76524	0.313432	2.61577	0.00890266	0.0176933	XP_022844116.1	uncharacterized_LOC111367460,_transcript_variant_X6	Olive
LOC111367469	18240.3	3.10605	8.61022	0.15755	19.7147	1.61e-86	7.95e-85	XP_022844129.1	GDSL_esterase/lipase_LTL1-like	Olive	PF00657:GDSL-like_Lipase/Acylhydrolase	IPR042266:PPPDE putative peptidase domain superfamily//IPR008580:PPPDE putative peptidase domain
LOC111367476	604.219	1.05671	2.08019	0.159781	6.6135	3.75e-11	1.95e-10	XP_022844143.1	protein_WVD2-like_3,_transcript_variant_X2	Olive	PF06886:Targeting_protein_for_Xklp2_(TPX2)
LOC111367478	103.594	1.04614	2.06499	0.324362	3.22521	0.0012588	0.0029056	XP_022844146.1	uncharacterized_LOC111367478,_transcript_variant_X4	Olive	PF09713:Plant_protein_1589_of_unknown_function_(A_thal_3526)	IPR041792:Purple acid phosphatase, metallophosphatase domain//IPR008963:Purple acid phosphatase-like, N-terminal//IPR029052:Metallo-dependent phosphatase-like
LOC111367480	472.537	2.16735	4.49199	0.16054	13.5004	1.56e-41	2.97e-40	XP_022844153.1	glucan_endo-1,3-beta-glucosidase_4-like,_transcript_variant_X5	Olive	PF00332:Glycosyl_hydrolases_family_17//PF07983:X8_domain	IPR000719:Protein kinase domain//IPR011009:Protein kinase-like domain superfamily//IPR001245:Serine-threonine/tyrosine-protein kinase, catalytic domain//IPR017441:Protein kinase, ATP binding site//IPR008271:Serine/threonine-protein kinase, active site
LOC111367481	112.386	0.795502	1.73568	0.305379	2.60496	0.00918837	0.0182001		uncharacterized_LOC111367481,_transcript_variant_X2	Olive		IPR043129:ATPase, nucleotide binding domain//IPR004000:Actin family
LOC111367482	97.9298	1.54685	2.92179	0.302604	5.1118	3.19e-07	1.18e-06		uncharacterized_LOC111367482	Olive
LOC111367487	235.626	1.24579	2.37148	0.210168	5.92759	3.07e-09	1.38e-08	XP_022844160.1	probable_rhamnogalacturonate_lyase_B	Olive	PF14686:Polysaccharide_lyase_family_4,_domain_II//PF06045:Rhamnogalacturonate_lyase_family//PF14683:Polysaccharide_lyase_family_4,_domain_III
LOC111367493	247.517	0.870058	1.82774	0.182535	4.76653	1.87e-06	6.39e-06	XP_022844169.1	putative_dual_specificity_protein_phosphatase_DSP8	Olive	PF00782:Dual_specificity_phosphatase,_catalytic_domain	IPR000222:PPM-type phosphatase, divalent cation binding//IPR001932:PPM-type phosphatase domain//IPR036457:PPM-type phosphatase domain superfamily
LOC111367499	98.7237	0.676547	1.59831	0.285702	2.36802	0.0178837	0.0332512	XP_022844177.1	RNA-binding_protein_pno1	Olive
LOC111367508	269.753	0.926021	1.90003	0.190768	4.85418	1.21e-06	4.2e-06	XP_022844193.1	putative_U-box_domain-containing_protein_50,_transcript_variant_X3	Olive	PF04564:U-box_domain//PF07714:Protein_tyrosine_kinase	IPR004181:Zinc finger, MIZ-type//IPR013083:Zinc finger, RING/FYVE/PHD-type
LOC111367509	652.876	0.419228	1.33721	0.133618	3.13752	0.00170384	0.00384241	XP_022844206.1	14-3-3_protein_1-like,_transcript_variant_X2	Olive	PF00244:14-3-3_protein	IPR001865:Ribosomal protein S2//IPR023591:Ribosomal protein S2, flavodoxin-like domain superfamily//IPR018130:Ribosomal protein S2, conserved site//IPR005706:Ribosomal protein S2, bacteria/mitochondria/plastid//IPR029044:Nucleotide-diphospho-sugar transferases
LOC111367518	374.981	0.738032	1.6679	0.155551	4.74463	2.09e-06	7.08e-06	XP_022844215.1	nitrate_regulatory_gene2_protein-like,_transcript_variant_X2	Olive	PF04782:Protein_of_unknown_function_(DUF632)//PF04783:Protein_of_unknown_function_(DUF630)
LOC111367519	393.739	1.10983	2.1582	0.286306	3.87638	0.000106024	0.000287928	XP_022844219.1	protein_CURVATURE_THYLAKOID_1D,_chloroplastic	Olive	PF14159:CAAD_domains_of_cyanobacterial_aminoacyl-tRNA_synthetase	IPR000719:Protein kinase domain//IPR017441:Protein kinase, ATP binding site//IPR008271:Serine/threonine-protein kinase, active site//IPR011009:Protein kinase-like domain superfamily
LOC111367528	127.885	1.2162	2.32335	0.261236	4.65557	3.23e-06	1.07e-05	XP_022844225.1	uncharacterized_LOC111367528	Olive		IPR036770:Ankyrin repeat-containing domain superfamily//IPR020683:Ankyrin repeat-containing domain//IPR002110:Ankyrin repeat
LOC111367543	1197.83	0.362401	1.28556	0.117479	3.08482	0.00203672	0.00453923	XP_022844249.1	tRNA_(cytosine(34)-C(5))-methyltransferase-like,_transcript_variant_X2	Olive	PF01189:16S_rRNA_methyltransferase_RsmB/F	IPR015943:WD40/YVTN repeat-like-containing domain superfamily
LOC111367548	477.9	2.09291	4.26607	0.165709	12.63	1.44e-36	2.36e-35	XP_022844254.1	protein_SCAI-like,_transcript_variant_X2	Olive	PF12070:Protein_SCAI	IPR011989:Armadillo-like helical//IPR001494:Importin-beta, N-terminal domain//IPR016024:Armadillo-type fold
LOC111367549	205.651	0.602976	1.51885	0.197394	3.05468	0.00225302	0.00498496	XP_022844897.1	pentatricopeptide_repeat-containing_protein_At1g52640,_mitochondrial,_transcript_variant_X9	Olive	PF01535:PPR_repeat//PF13041:PPR_repeat_family	IPR015915:Kelch-type beta propeller//IPR001810:F-box domain//IPR036047:F-box-like domain superfamily//IPR006652:Kelch repeat type 1
LOC111367566	79.245	1.57302	2.97527	0.355383	4.42626	9.59e-06	2.99e-05	XP_022844275.1	probable_cinnamyl_alcohol_dehydrogenase_6	Olive	PF08240:Alcohol_dehydrogenase_GroES-like_domain//PF00107:Zinc-binding_dehydrogenase	IPR027417:P-loop containing nucleoside triphosphate hydrolase
LOC111367570	62.8095	1.78701	3.45098	0.394738	4.52706	5.98e-06	1.91e-05	XP_022844282.1	protein_MID1-COMPLEMENTING_ACTIVITY_1-like,_transcript_variant_X3	Olive	PF04749:PLAC8_family	IPR011124:Zinc finger, CW-type//IPR015300:DNA-binding pseudobarrel domain superfamily//IPR003340:B3 DNA binding domain
LOC111367571	103.648	1.63631	3.10871	0.413717	3.95515	7.65e-05	0.000212253	XP_022844285.1	uncharacterized_LOC111367571,_transcript_variant_X3	Olive
LOC111367574	1719.85	0.937065	1.91463	0.121767	7.69558	1.41e-14	9.2e-14	XP_022844290.1	spliceosome-associated_protein_130_A	Olive	PF03178:CPSF_A_subunit_region//PF10433:Mono-functional_DNA-alkylating_methyl_methanesulfonate_N-term	IPR004698:Zinc/iron permease, fungal/plant
LOC111367577	174.71	1.60327	3.03832	0.259254	6.18419	6.24e-10	2.96e-09	XP_022844294.1	peptidyl-prolyl_cis-trans_isomerase_FKBP18,_chloroplastic,_transcript_variant_X2	Olive	PF00254:FKBP-type_peptidyl-prolyl_cis-trans_isomerase
LOC111367580	1465.84	2.363	5.14439	0.134214	17.6062	2.21e-69	8.01e-68	XP_022844299.1	L-ascorbate_oxidase_homolog	Olive	PF07731:Multicopper_oxidase//PF00394:Multicopper_oxidase//PF07732:Multicopper_oxidase
LOC111367584	292.593	2.51076	5.69922	0.194866	12.8845	5.5e-38	9.39e-37	XP_022844303.1	thaumatin-like_protein_1b	Olive	PF00314:Thaumatin_family
LOC111367597	376.972	1.02707	2.03789	0.177065	5.80054	6.61e-09	2.88e-08	XP_022844321.1	uncharacterized_LOC111367597	Olive	PF03141:Putative_S-adenosyl-L-methionine-dependent_methyltransferase	IPR011013:Galactose mutarotase-like domain superfamily//IPR017853:Glycoside hydrolase superfamily
LOC111367601	73.7002	0.852918	1.80615	0.348864	2.44484	0.0144915	0.0275176		uncharacterized_LOC111367601,_transcript_variant_X6	Olive		IPR035969:Rab-GTPase-TBC domain superfamily//IPR000195:Rab-GTPase-TBC domain
LOC111367603	1123.05	0.473376	1.38835	0.11227	4.2164	2.48e-05	7.34e-05	XP_022844335.1	protein_BASIC_PENTACYSTEINE6-like,_transcript_variant_X8	Olive	PF06217:GAGA_binding_protein-like_family
LOC111367606	285.149	0.40864	1.32743	0.178747	2.28614	0.0222459	0.0404829		uncharacterized_LOC111367606	Olive
LOC111367608	115.36	1.27121	2.41365	0.26923	4.72166	2.34e-06	7.88e-06	XP_022844340.1	uncharacterized_LOC111367608,_transcript_variant_X3	Olive		IPR011016:Zinc finger, RING-CH-type//IPR013083:Zinc finger, RING/FYVE/PHD-type
LOC111367614	234.62	0.900608	1.86685	0.293059	3.07313	0.00211825	0.00470689	XP_022844352.1	protein_AE7-like_1,_transcript_variant_X6	Olive	PF01883:Iron-sulfur_cluster_assembly_protein
LOC111367615	223.509	0.512075	1.4261	0.229089	2.23527	0.0253998	0.0455463	XP_022844354.1	mediator_of_RNA_polymerase_II_transcription_subunit_18,_transcript_variant_X2	Olive		IPR006012:Syntaxin/epimorphin, conserved site//IPR000727:Target SNARE coiled-coil homology domain
LOC111367624	278.812	0.801072	1.7424	0.187189	4.27947	1.87e-05	5.62e-05	XP_022844366.1	heavy_metal-associated_isoprenylated_plant_protein_23	Olive	PF00403:Heavy-metal-associated_domain
LOC111367625	205.329	1.09667	2.1386	0.224862	4.87707	1.08e-06	3.77e-06	XP_022844368.1	aspartic_proteinase-like_protein_1,_transcript_variant_X2	Olive	PF14541:Xylanase_inhibitor_C-terminal//PF14543:Xylanase_inhibitor_N-terminal
LOC111367630	1501.47	0.961608	1.94748	0.109811	8.7569	2.01e-18	1.61e-17	XP_022844386.1	receptor-like_serine/threonine-protein_kinase_ALE2,_transcript_variant_X2	Olive	PF07714:Protein_tyrosine_kinase	IPR029067:CDC48 domain 2-like superfamily//IPR009010:Aspartate decarboxylase-like domain superfamily//IPR027417:P-loop containing nucleoside triphosphate hydrolase
LOC111367631	764.66	0.531746	1.44568	0.136243	3.90293	9.5e-05	0.000260037	XP_022844377.1	UBP1-associated_protein_2B-like,_transcript_variant_X2	Olive	PF00076:RNA_recognition_motif._(a.k.a._RRM,_RBD,_or_RNP_domain)	IPR036013:Band 7/SPFH domain superfamily//IPR033294:Erlin1/2//IPR001107:Band 7 domain
LOC111367632	250.553	0.709631	1.63539	0.239203	2.96665	0.00301059	0.00650786	XP_022844378.1	E3_ubiquitin-protein_ligase_ATL59-like	Olive	PF13639:Ring_finger_domain	IPR002885:Pentatricopeptide repeat//IPR011990:Tetratricopeptide-like helical domain superfamily
LOC111367638	407.645	0.529183	1.44311	0.15373	3.4423	0.000576791	0.00140464	XP_022844391.1	OTU_domain-containing_protein_6B	Olive	PF02338:OTU-like_cysteine_protease	IPR043001:Inositol-pentakisphosphate 2-kinase, N-terminal
LOC111367641	93.6985	1.72999	3.31726	0.319833	5.40905	6.34e-08	2.51e-07	XP_022844395.1	uncharacterized_LOC111367641,_transcript_variant_X2	Olive		IPR003960:ATPase, AAA-type, conserved site//IPR003593:AAA+ ATPase domain//IPR027417:P-loop containing nucleoside triphosphate hydrolase
LOC111367642	650.671	0.430611	1.3478	0.150074	2.86932	0.00411354	0.00869367	XP_022844398.1	5'-nucleotidase_SurE-like	Olive	PF01975:Survival_protein_SurE
LOC111367652	170.809	3.50435	11.3479	0.332784	10.5304	6.26e-26	7.04e-25	XP_022844406.1	myb-related_protein_Zm1-like	Olive	PF00249:Myb-like_DNA-binding_domain	IPR006045:Cupin 1//IPR001929:Germin//IPR014710:RmlC-like jelly roll fold//IPR019780:Germin, manganese binding site//IPR011051:RmlC-like cupin domain superfamily
LOC111367657	356.477	0.423577	1.34125	0.1591	2.66234	0.00776002	0.0155819	XP_022844413.1	70_kDa_peptidyl-prolyl_isomerase,_transcript_variant_X4	Olive		IPR038508:ArfGAP domain superfamily//IPR001164:Arf GTPase activating protein//IPR037278:ARFGAP/RecO-like zinc finger
LOC111367658	132.673	2.26961	4.82194	0.333216	6.81124	9.68e-12	5.25e-11	XP_022844415.1	protein_IQ-DOMAIN_1-like	Olive	PF00612:IQ_calmodulin-binding_motif	IPR038469:tRNAHis guanylyltransferase Thg1 superfamily
LOC111367662	152.121	3.59665	12.0976	0.308805	11.647	2.38e-31	3.31e-30	XP_022844417.1	uncharacterized_LOC111367662	Olive	PF03763:Remorin,_C-terminal_region	IPR029058:Alpha/Beta hydrolase fold
LOC111367669	128.032	0.715165	1.64167	0.270652	2.64238	0.00823266	0.0164502	XP_022844424.1	centromere_protein_C-like	Olive		IPR037176:Osmotin/thaumatin-like superfamily//IPR001938:Thaumatin family//IPR017949:Thaumatin, conserved site
LOC111367673	289.395	3.51822	11.4575	0.248736	14.1444	2.02e-45	4.35e-44	XP_022844434.1	ABC_transporter_G_family_member_5	Olive	PF01061:ABC-2_type_transporter//PF00005:ABC_transporter	IPR001356:Homeobox domain//IPR002913:START domain//IPR009057:Homeobox-like domain superfamily//IPR017970:Homeobox, conserved site
LOC111367674	170.034	0.780444	1.71766	0.236177	3.30449	0.000951484	0.00224038			Olive		IPR036259:MFS transporter superfamily
LOC111367675	65.576	1.14164	2.20632	0.345325	3.30599	0.000946431	0.0022288	XP_022844435.1	pentatricopeptide_repeat-containing_protein_At2g13600	Olive	PF13041:PPR_repeat_family//PF01535:PPR_repeat	IPR036259:MFS transporter superfamily
LOC111367678	2104.48	1.5006	2.8296	0.120744	12.428	1.84e-35	2.92e-34	XP_022844438.1	probable_methyltransferase_PMT26	Olive	PF03141:Putative_S-adenosyl-L-methionine-dependent_methyltransferase	IPR036188:FAD/NAD(P)-binding domain superfamily
LOC111367687	945.184	0.519661	1.43362	0.125603	4.13731	3.51e-05	0.000101922	XP_022844450.1	heterogeneous_nuclear_ribonucleoprotein_1-like,_transcript_variant_X2	Olive	PF00076:RNA_recognition_motif._(a.k.a._RRM,_RBD,_or_RNP_domain)	IPR029063:S-adenosyl-L-methionine-dependent methyltransferase
LOC111367691	102.211	1.41874	2.67351	0.288229	4.92226	8.56e-07	3.02e-06	XP_022844457.1	NDR1/HIN1-like_protein_13	Olive	PF03168:Late_embryogenesis_abundant_protein
LOC111367694	481.294	0.868479	1.82574	0.23497	3.69613	0.000218913	0.000568559	XP_022844463.1	WD-40_repeat-containing_protein_MSI4-like,_transcript_variant_X2	Olive	PF00400:WD_domain,_G-beta_repeat	IPR005202:Transcription factor GRAS
LOC111367696	853.796	1.42826	2.69123	0.128685	11.0989	1.27e-28	1.6e-27	XP_022844468.1	beta-galactosidase-like	Olive	PF01301:Glycosyl_hydrolases_family_35//PF02140:Galactose_binding_lectin_domain//PF17834:Beta-sandwich_domain_in_beta_galactosidase	IPR012131:Histidinol dehydrogenase//IPR022695:Histidinol dehydrogenase, monofunctional//IPR001692:Histidinol dehydrogenase, conserved site//IPR016161:Aldehyde/histidinol dehydrogenase
LOC111367713	149.441	0.928675	1.90353	0.238541	3.89314	9.9e-05	0.0002701	XP_022844502.1	50S_ribosomal_protein_L9	Olive	PF01281:Ribosomal_protein_L9,_N-terminal_domain//PF03948:Ribosomal_protein_L9,_C-terminal_domain	IPR013320:Concanavalin A-like lectin/glucanase domain superfamily//IPR001079:Galectin, carbohydrate recognition domain
LOC111367720	360.616	2.74069	6.6839	0.186637	14.6846	8.09e-49	1.91e-47	XP_022844512.1	rhodanese-like_domain-containing_protein_14,_chloroplastic	Olive	PF00581:Rhodanese-like_domain
LOC111367725	447.046	0.612746	1.52917	0.174232	3.51684	0.000436721	0.00108258	XP_022844520.1	pyridoxal_reductase,_chloroplastic,_transcript_variant_X3	Olive	PF00248:Aldo/keto_reductase_family
LOC111367726	51.7171	1.10251	2.14728	0.388685	2.83652	0.00456087	0.00956157	XP_022844522.1	homeobox-leucine_zipper_protein_ATHB-12-like	Olive	PF02183:Homeobox_associated_leucine_zipper//PF00046:Homeodomain
LOC111367728	888.39	1.19676	2.29224	0.141174	8.4772	2.31e-17	1.76e-16	XP_022844526.1	uncharacterized_LOC111367728,_transcript_variant_X3	Olive
LOC111367731	449.286	1.51905	2.86602	0.156833	9.68576	3.47e-22	3.34e-21	XP_022844531.1	subtilisin-like_protease_SBT3.5,_transcript_variant_X3	Olive	PF17766:Fibronectin_type-III_domain//PF05922:Peptidase_inhibitor_I9//PF00082:Subtilase_family	IPR001810:F-box domain//IPR036047:F-box-like domain superfamily//IPR017451:F-box associated interaction domain
LOC111367733	179.308	1.67259	3.18786	0.230861	7.24499	4.32e-13	2.57e-12	XP_022844532.1	transcription_termination_factor_MTERF8,_chloroplastic-like	Olive	PF02536:mTERF
LOC111367735	2324.49	0.893702	1.85794	0.112421	7.94961	1.87e-15	1.29e-14	XP_022844535.1	two-component_response_regulator-like_APRR3,_transcript_variant_X3	Olive	PF06203:CCT_motif	IPR009057:Homeobox-like domain superfamily//IPR001356:Homeobox domain
LOC111367741	1205.72	1.36036	2.56749	0.190671	7.13457	9.71e-13	5.63e-12	XP_022844542.1	nascent_polypeptide-associated_complex_subunit_alpha-like_protein_2,_transcript_variant_X2	Olive	PF01849:NAC_domain
LOC111367742	233.335	2.49106	5.62191	0.255805	9.73814	2.07e-22	2.02e-21	XP_022844543.1	heavy_metal-associated_isoprenylated_plant_protein_9-like	Olive	PF00403:Heavy-metal-associated_domain	IPR010977:Aromatic-L-amino-acid decarboxylase//IPR015424:Pyridoxal phosphate-dependent transferase
LOC111367744	496.319	0.568794	1.48328	0.14855	3.82897	0.000128681	0.000345083	XP_022844546.1	IAA-amino_acid_hydrolase_ILR1-like_5,_transcript_variant_X2	Olive	PF01546:Peptidase_family_M20/M25/M40//PF07687:Peptidase_dimerisation_domain	IPR036570:HORMA domain superfamily//IPR003511:HORMA domain
LOC111367746	3764.92	0.495094	1.40941	0.104488	4.73827	2.16e-06	7.29e-06	XP_022844549.1	60S_ribosomal_protein_L9-like	Olive	PF00347:Ribosomal_protein_L6	IPR003265:HhH-GPD domain//IPR003651:Endonuclease III-like, iron-sulphur cluster loop motif//IPR011257:DNA glycosylase//IPR023170:Helix-turn-helix, base-excision DNA repair, C-terminal
LOC111367747	250.115	1.18411	2.27223	0.21326	5.55243	2.82e-08	1.16e-07	XP_022844550.1	stomatin-like_protein_2,_mitochondrial	Olive	PF16200:C-terminal_region_of_band_7//PF01145:SPFH_domain_/_Band_7_family	IPR035898:TAZ domain superfamily//IPR031162:CBP/p300-type histone acetyltransferase domain//IPR011011:Zinc finger, FYVE/PHD-type//IPR000197:Zinc finger, TAZ-type//IPR013083:Zinc finger, RING/FYVE/PHD-type//IPR000433:Zinc finger, ZZ-type//IPR043145:Zinc finger, ZZ-type superfamily//IPR001965:Zinc finger, PHD-type//IPR013178:Histone acetyltransferase Rtt109/CBP
LOC111367761	466.768	2.21985	4.65844	0.193947	11.4456	2.47e-30	3.3e-29	XP_022844573.1	uncharacterized_LOC111367761,_transcript_variant_X2	Olive
LOC111367763	1111.18	0.734656	1.664	0.143518	5.1189	3.07e-07	1.14e-06	XP_022844582.1	protein_EXPORTIN_1A,_transcript_variant_X3	Olive	PF08767:CRM1_C_terminal//PF18784:CRM1_/_Exportin_repeat_2//PF18787:CRM1_/_Exportin_repeat_3//PF08389:Exportin_1-like_protein//PF18777:Chromosome_region_maintenance_or_exportin_repeat	IPR001965:Zinc finger, PHD-type//IPR035445:GYF-like domain superfamily//IPR003169:GYF domain//IPR036128:Plus3-like superfamily//IPR013083:Zinc finger, RING/FYVE/PHD-type//IPR019786:Zinc finger, PHD-type, conserved site//IPR004343:Plus-3 domain//IPR036855:Zinc finger, CCCH-type superfamily//IPR019787:Zinc finger, PHD-finger//IPR011011:Zinc finger, FYVE/PHD-type//IPR000571:Zinc finger, CCCH-type
LOC111367764	3998.75	1.1674	2.24606	0.128059	9.11606	7.79e-20	6.73e-19	XP_022844583.1	phosphoribulokinase,_chloroplastic-like	Olive	PF00485:Phosphoribulokinase_/_Uridine_kinase_family
LOC111367765	335.501	1.09685	2.13887	0.185196	5.92264	3.17e-09	1.42e-08	XP_022844585.1	CSC1-like_protein_At1g32090,_transcript_variant_X2	Olive	PF14703:Cytosolic_domain_of_10TM_putative_phosphate_transporter//PF02714:Calcium-dependent_channel,_7TM_region,_putative_phosphate
LOC111367768	300.966	0.999343	1.99909	0.176189	5.67199	1.41e-08	5.98e-08	XP_022844600.1	uncharacterized_LOC111367768,_transcript_variant_X2	Olive	PF03810:Importin-beta_N-terminal_domain
LOC111367769	134.142	0.561832	1.47614	0.255485	2.19908	0.0278721	0.0494783	XP_022844587.1	putative_late_blight_resistance_protein_homolog_R1A-10	Olive	PF00931:NB-ARC_domain	IPR027500:40S ribosomal protein S1/3, eukaryotes//IPR001593:Ribosomal protein S3Ae//IPR018281:Ribosomal protein S3Ae, conserved site
LOC111367776	545.266	3.0789	8.44972	0.274143	11.231	2.87e-29	3.71e-28	XP_022844599.1	high_mobility_group_B_protein_13-like	Olive	PF00505:HMG_(high_mobility_group)_box	IPR006861:Hyaluronan/mRNA-binding protein
LOC111367783	355.49	0.406189	1.32518	0.161722	2.51165	0.012017	0.0232333	XP_022844613.1	trihelix_transcription_factor_GT-2-like	Olive	PF13837:Myb/SANT-like_DNA-binding_domain	IPR010989:SNARE
LOC111367785	162.741	1.14634	2.21351	0.238041	4.8157	1.47e-06	5.06e-06	XP_022844616.1	probable_plastid-lipid-associated_protein_7,_chloroplastic,_transcript_variant_X2	Olive	PF04755:PAP_fibrillin	IPR036873:Rhodanese-like domain superfamily//IPR001763:Rhodanese-like domain
LOC111367787	1017.47	0.272928	1.20826	0.120786	2.2596	0.0238463	0.0430521	XP_022844618.1	carbamoyl-phosphate_synthase_small_chain,_chloroplastic-like	Olive	PF00117:Glutamine_amidotransferase_class-I//PF00988:Carbamoyl-phosphate_synthase_small_chain,_CPSase_domain	IPR033129:Phosphoenolpyruvate carboxylase, His active site//IPR021135:Phosphoenolpyruvate carboxylase//IPR018129:Phosphoenolpyruvate carboxylase, Lys active site//IPR022805:Phosphoenolpyruvate carboxylase, bacterial/plant-type//IPR015813:Pyruvate/Phosphoenolpyruvate kinase-like domain superfamily
LOC111367791	804.025	0.380572	1.30186	0.120225	3.16549	0.00154821	0.00351738	XP_022844620.1	ubiquitin_carboxyl-terminal_hydrolase_26,_transcript_variant_X2	Olive	PF00443:Ubiquitin_carboxyl-terminal_hydrolase	IPR006598:Glycosyl transferase CAP10 domain
LOC111367798	216.86	1.36841	2.58186	0.21268	6.43414	1.24e-10	6.22e-10	XP_022844630.1	pentatricopeptide_repeat-containing_protein_At1g09900-like	Olive	PF13041:PPR_repeat_family//PF12854:PPR_repeat
LOC111367803	89.4141	2.03181	4.08918	0.40039	5.07458	3.88e-07	1.43e-06	XP_022844633.1	uncharacterized_WD_repeat-containing_protein_alr3466-like,_transcript_variant_X2	Olive	PF00400:WD_domain,_G-beta_repeat	IPR042086:Methyltransferase, alpha-helical capping domain//IPR029063:S-adenosyl-L-methionine-dependent methyltransferase
LOC111367810	81.9367	1.27222	2.41532	0.301339	4.22188	2.42e-05	7.17e-05		uncharacterized_LOC111367810	Olive		IPR017930:Myb domain//IPR001005:SANT/Myb domain//IPR009057:Homeobox-like domain superfamily
LOC111367818	66.5499	0.913791	1.88399	0.381077	2.39791	0.0164887	0.0309276			Olive
LOC111367822	407.69	1.41164	2.6604	0.157152	8.98266	2.64e-19	2.22e-18	XP_022844653.1	photosystem_II_core_complex_proteins_psbY,_chloroplastic-like	Olive	PF06298:Photosystem_II_protein_Y_(PsbY)
LOC111367834	161.636	4.89294	29.7113	0.403405	12.1291	7.41e-34	1.12e-32	XP_022844666.1	CASP-like_protein_3A1	Olive	PF04535:Domain_of_unknown_function_(DUF588)	IPR005455:Profilin//IPR036140:Profilin superfamily
LOC111367836	1255.96	0.599161	1.51484	0.111055	5.39518	6.85e-08	2.71e-07	XP_022844668.1	homeobox-leucine_zipper_protein_ATHB-15-like	Olive	PF08670:MEKHLA_domain//PF00046:Homeodomain//PF01852:START_domain
LOC111367837	1074.24	1.0486	2.06851	0.12907	8.12423	4.5e-16	3.2e-15	XP_022844672.1	CBL-interacting_serine/threonine-protein_kinase_1-like	Olive	PF03822:NAF_domain//PF00069:Protein_kinase_domain
LOC111367844	959.205	0.384175	1.30511	0.123328	3.11507	0.001839	0.00412728	XP_022844677.1	alcohol_dehydrogenase_1B-like	Olive	PF00107:Zinc-binding_dehydrogenase//PF08240:Alcohol_dehydrogenase_GroES-like_domain	IPR001878:Zinc finger, CCHC-type
LOC111367846	328.483	1.30184	2.46543	0.214407	6.07179	1.26e-09	5.86e-09	XP_022844680.1	translation_factor_GUF1_homolog,_chloroplastic,_transcript_variant_X2	Olive	PF00679:Elongation_factor_G_C-terminus//PF00009:Elongation_factor_Tu_GTP_binding_domain//PF03144:Elongation_factor_Tu_domain_2//PF06421:GTP-binding_protein_LepA_C-terminus
LOC111367847	369.037	1.08077	2.11517	0.164153	6.58394	4.58e-11	2.37e-10	XP_022844693.1	sucrose_nonfermenting_4-like_protein,_transcript_variant_X3	Olive	PF00571:CBS_domain//PF16561:Glycogen_recognition_site_of_AMP-activated_protein_kinase
LOC111367854	517.716	0.452336	1.36825	0.147039	3.0763	0.00209587	0.00466087	XP_022844696.1	ultraviolet-B_receptor_UVR8-like,_transcript_variant_X3	Olive	PF00415:Regulator_of_chromosome_condensation_(RCC1)_repeat	IPR016518:Alpha-L-fucosidase//IPR012341:Six-hairpin glycosidase-like superfamily//IPR008928:Six-hairpin glycosidase superfamily
LOC111367855	141.995	0.840489	1.79066	0.228598	3.67672	0.000236255	0.00061077	XP_022844698.1	psbP_domain-containing_protein_2,_chloroplastic,_transcript_variant_X2	Olive	PF01789:PsbP
LOC111367856	223.149	2.41295	5.32563	0.225573	10.697	1.05e-26	1.22e-25	XP_022844702.1	aspartic_proteinase_Asp1,_transcript_variant_X4	Olive	PF14541:Xylanase_inhibitor_C-terminal//PF14543:Xylanase_inhibitor_N-terminal	IPR011016:Zinc finger, RING-CH-type//IPR001841:Zinc finger, RING-type//IPR013083:Zinc finger, RING/FYVE/PHD-type
LOC111367867	143.052	1.18856	2.27925	0.23384	5.08278	3.72e-07	1.37e-06	XP_022844710.1	nodulation_protein_H,_transcript_variant_X2	Olive	PF00685:Sulfotransferase_domain	IPR002401:Cytochrome P450, E-class, group I//IPR036396:Cytochrome P450 superfamily//IPR001128:Cytochrome P450//IPR017972:Cytochrome P450, conserved site
LOC111367869	538.72	0.519695	1.43365	0.138291	3.75798	0.000171294	0.000451542	XP_022844711.1	patatin-like_protein_3	Olive	PF01734:Patatin-like_phospholipase	IPR035669:GDSL lipase/esterase-like, plant//IPR036514:SGNH hydrolase superfamily
LOC111367873	128.403	1.78924	3.45633	0.268637	6.66046	2.73e-11	1.44e-10	XP_022844728.1	heat_shock_factor-binding_protein_1-like	Olive	PF06825:Heat_shock_factor_binding_protein_1	IPR023828:Peptidase S8, subtilisin, Ser-active site//IPR015500:Peptidase S8, subtilisin-related//IPR036852:Peptidase S8/S53 domain superfamily//IPR034197:Cucumisin-like catalytic domain//IPR037045:Peptidase S8 propeptide/proteinase inhibitor I9 superfamily
LOC111367877	293.926	1.65156	3.14173	0.184535	8.94985	3.56e-19	2.97e-18	XP_022844731.1	probable_inactive_receptor_kinase_At5g67200	Olive	PF13855:Leucine_rich_repeat//PF00069:Protein_kinase_domain	IPR032675:Leucine-rich repeat domain superfamily//IPR008808:Powdery mildew resistance protein, RPW8 domain//IPR027417:P-loop containing nucleoside triphosphate hydrolase
LOC111367879	93.2185	1.1238	2.17921	0.286684	3.92001	8.85e-05	0.000243645		uncharacterized_LOC111367879	Olive
LOC111367883	144.184	1.4109	2.65904	0.264263	5.33901	9.35e-08	3.64e-07	XP_022844743.1	filament-like_plant_protein_7,_transcript_variant_X5	Olive	PF05911:Filament-like_plant_protein,_long_coiled-coil
LOC111367888	228.979	0.4254	1.34294	0.183827	2.31413	0.0206605	0.0378862	XP_022844755.1	DNA-directed_RNA_polymerase_2B,_chloroplastic/mitochondrial-like,_transcript_variant_X8	Olive	PF14700:DNA-directed_RNA_polymerase_N-terminal//PF00940:DNA-dependent_RNA_polymerase	IPR029044:Nucleotide-diphospho-sugar transferases
LOC111367892	1068.07	0.500742	1.41494	0.150964	3.31697	0.00090999	0.00215126	XP_022844760.1	protein_furry_homolog-like,_transcript_variant_X2	Olive	PF14225:Cell_morphogenesis_C-terminal//PF14228:Cell_morphogenesis_central_region//PF14222:Cell_morphogenesis_N-terminal
LOC111367893	290.492	2.12882	4.3736	0.192559	11.0554	2.06e-28	2.59e-27	XP_022844781.1	condensin-2_complex_subunit_D3,_transcript_variant_X3	Olive	PF12717:non-SMC_mitotic_condensation_complex_subunit_1	IPR013766:Thioredoxin domain//IPR036249:Thioredoxin-like superfamily
LOC111367902	287.02	1.81915	3.52874	0.245927	7.39712	1.39e-13	8.51e-13	XP_022844778.1	zinc_finger_protein_CONSTANS-LIKE_2	Olive	PF06203:CCT_motif
LOC111367904	164.981	1.44674	2.72592	0.25574	5.65709	1.54e-08	6.5e-08	XP_022844784.1	protein_NSP-INTERACTING_KINASE_1-like	Olive	PF08263:Leucine_rich_repeat_N-terminal_domain//PF00069:Protein_kinase_domain//PF13855:Leucine_rich_repeat	IPR036249:Thioredoxin-like superfamily
LOC111367906	590.76	0.541641	1.45563	0.136907	3.95627	7.61e-05	0.000211352	XP_022844787.1	probable_inactive_ATP-dependent_zinc_metalloprotease_FTSHI_3,_chloroplastic,_transcript_variant_X2	Olive	PF00004:ATPase_family_associated_with_various_cellular_activities_(AAA)//PF17862:AAA+_lid_domain//PF06480:FtsH_Extracellular	IPR005202:Transcription factor GRAS
LOC111367915	587.839	0.871521	1.82959	0.179293	4.86088	1.17e-06	4.07e-06	XP_022844797.1	isoprenylcysteine_alpha-carbonyl_methylesterase_ICME	Olive	PF07859:alpha/beta_hydrolase_fold	IPR000644:CBS domain
LOC111367917	129.589	1.49026	2.80939	0.302727	4.92278	8.53e-07	3.02e-06	XP_022844802.1	condensin-2_complex_subunit_H2-like,_transcript_variant_X2	Olive	PF16869:PF16858//PF16858:Condensin_II_complex_subunit_CAP-H2_or_CNDH2,_C-term	IPR036188:FAD/NAD(P)-binding domain superfamily
LOC111367922	437.45	0.820212	1.76567	0.182262	4.50019	6.79e-06	2.15e-05	XP_022844803.1	elongation_of_fatty_acids_protein_3-like	Olive	PF01151:GNS1/SUR4_family
LOC111367924	301.476	1.85244	3.61111	0.182664	10.1413	3.62e-24	3.8e-23	XP_022844805.1	probable_galacturonosyltransferase-like_1	Olive	PF01501:Glycosyl_transferase_family_8
LOC111367929	165.194	0.492901	1.40727	0.223757	2.20284	0.0276058	0.0490573	XP_022844813.1	UPF0603_protein_At1g54780,_chloroplastic-like	Olive	PF04536:TPM_domain
LOC111367933	429.091	0.582977	1.49794	0.179748	3.2433	0.00118155	0.00274028	XP_022844823.1	BTB/POZ_domain-containing_protein_At3g50780-like	Olive
LOC111367939	8555.92	1.01119	2.01557	0.0965421	10.4741	1.14e-25	1.27e-24	XP_022844834.1	oxygen-evolving_enhancer_protein_1,_chloroplastic	Olive	PF01716:Manganese-stabilising_protein_/_photosystem_II_polypeptide	IPR042266:PPPDE putative peptidase domain superfamily//IPR008580:PPPDE putative peptidase domain
LOC111367943	162.6	1.32362	2.50293	0.24313	5.44407	5.21e-08	2.09e-07	XP_022844840.1	uncharacterized_LOC111367943	Olive		IPR000408:Regulator of chromosome condensation, RCC1//IPR009091:Regulator of chromosome condensation 1/beta-lactamase-inhibitor protein II//IPR000306:FYVE zinc finger//IPR013083:Zinc finger, RING/FYVE/PHD-type//IPR011993:PH-like domain superfamily//IPR011011:Zinc finger, FYVE/PHD-type//IPR017455:Zinc finger, FYVE-related
LOC111367945	297.428	0.648291	1.56731	0.223306	2.90315	0.00369432	0.00786502	XP_022844841.1	uncharacterized_LOC111367945	Olive
LOC111367947	243.27	2.07447	4.2119	0.207266	10.0088	1.39e-23	1.43e-22	XP_022844847.1	uncharacterized_LOC111367947	Olive	PF10497:Zinc-finger_domain_of_monoamine-oxidase_A_repressor_R1
LOC111367948	73.4442	1.41184	2.66077	0.335434	4.20901	2.56e-05	7.57e-05	XP_022844848.1	GDSL_esterase/lipase_At2g23540-like	Olive	PF00657:GDSL-like_Lipase/Acylhydrolase
LOC111367949	349.226	3.80879	14.0139	0.224304	16.9805	1.15e-64	3.81e-63	XP_022844849.1	dof_zinc_finger_protein_DOF3.4-like	Olive	PF02701:Dof_domain,_zinc_finger
LOC111367959	737.108	1.56784	2.9646	0.159861	9.80749	1.05e-22	1.03e-21	XP_022844868.1	protein_IQ-DOMAIN_31-like,_transcript_variant_X6	Olive	PF00612:IQ_calmodulin-binding_motif//PF13178:Protein_of_unknown_function_(DUF4005)
LOC111367963	163.037	0.618681	1.53547	0.229699	2.69344	0.00707194	0.0143111	XP_022844881.1	3-dehydroquinate_synthase_homolog,_transcript_variant_X9	Olive	PF01959:3-dehydroquinate_synthase_II	IPR037143:4'-phosphopantetheinyl transferase domain superfamily
LOC111367965	295.873	0.651792	1.57112	0.178821	3.64493	0.000267461	0.000685279	XP_022844883.1	probable_serine/threonine-protein_kinase_PIX7,_transcript_variant_X2	Olive	PF07714:Protein_tyrosine_kinase
LOC111367969	578.666	1.93101	3.81322	0.174043	11.095	1.33e-28	1.67e-27	XP_022844889.1	transcription_factor_PRE5-like	Olive
LOC111367970	468.708	3.11874	8.68627	0.223524	13.9526	3.03e-44	6.29e-43	XP_022844890.1	ABC_transporter_B_family_member_19	Olive	PF00664:ABC_transporter_transmembrane_region//PF00005:ABC_transporter	IPR012946:X8 domain//IPR017853:Glycoside hydrolase superfamily
LOC111367971	902.465	0.714062	1.64042	0.154667	4.61676	3.9e-06	1.27e-05	XP_022844892.1	thyroid_adenoma-associated_protein_homolog,_transcript_variant_X2	Olive	PF10350:Putative_death-receptor_fusion_protein_(DUF2428)	IPR011009:Protein kinase-like domain superfamily//IPR000719:Protein kinase domain//IPR017441:Protein kinase, ATP binding site
LOC111367974	199.757	4.48984	22.4686	0.331208	13.5559	7.31e-42	1.41e-40	XP_022844898.1	ammonium_transporter_1_member_3-like	Olive	PF00909:Ammonium_Transporter_Family
LOC111367981	218.695	1.28068	2.42953	0.215639	5.93901	2.87e-09	1.29e-08	XP_022844907.1	protein_IMPAIRED_IN_BABA-INDUCED_STERILITY_1-like,_transcript_variant_X2	Olive	PF00069:Protein_kinase_domain	IPR014720:Double-stranded RNA-binding domain//IPR004274:FCP1 homology domain//IPR036412:HAD-like superfamily
LOC111367984	437.89	0.476719	1.39158	0.163891	2.90875	0.00362875	0.00773669	XP_022844910.1	pentatricopeptide_repeat-containing_protein_PNM1,_mitochondrial-like,_transcript_variant_X2	Olive	PF13812:Pentatricopeptide_repeat_domain//PF13041:PPR_repeat_family
LOC111367995	1396.98	0.540824	1.4548	0.1412	3.8302	0.000128041	0.000343558	XP_022844923.1	60S_ribosomal_protein_L7-4-like,_transcript_variant_X2	Olive	PF00327:Ribosomal_protein_L30p/L7e//PF08079:Ribosomal_L30_N-terminal_domain	IPR000795:Transcription factor, GTP-binding domain//IPR005225:Small GTP-binding protein domain//IPR035647:EF-G domain III/V-like//IPR031157:Tr-type G domain, conserved site//IPR014721:Ribosomal protein S5 domain 2-type fold, subgroup//IPR020568:Ribosomal protein S5 domain 2-type fold//IPR005517:Translation elongation factor EFG/EF2, domain IV//IPR027417:P-loop containing nucleoside triphosphate h…
LOC111367998	435.77	1.26396	2.40155	0.154587	8.17638	2.92e-16	2.1e-15	XP_022844926.1	protein_MANNAN_SYNTHESIS-RELATED_2-like	Olive	PF10250:GDP-fucose_protein_O-fucosyltransferase
LOC111368006	154.378	0.938783	1.91691	0.330215	2.84294	0.00446988	0.00938427	XP_022844933.1	nitrate_regulatory_gene2_protein-like	Olive	PF04782:Protein_of_unknown_function_(DUF632)//PF04783:Protein_of_unknown_function_(DUF630)	IPR001810:F-box domain//IPR032675:Leucine-rich repeat domain superfamily//IPR017451:F-box associated interaction domain//IPR036047:F-box-like domain superfamily
LOC111368007	258.894	1.27127	2.41373	0.191457	6.63995	3.14e-11	1.64e-10	XP_022844935.1	kinesin-like_protein_KIN-13B,_transcript_variant_X2	Olive	PF00225:Kinesin_motor_domain	IPR032675:Leucine-rich repeat domain superfamily//IPR027417:P-loop containing nucleoside triphosphate hydrolase
LOC111368014	304.673	3.29401	9.80832	0.344226	9.5693	1.08e-21	1.01e-20	XP_022844944.1	photosystem_I_reaction_center_subunit_VI,_chloroplastic-like	Olive	PF03244:Photosystem_I_reaction_centre_subunit_VI	IPR016899:mRNA cap guanine-N7 methyltransferase, eukaryotes//IPR004971:mRNA (guanine-N(7))-methyltransferase domain//IPR029063:S-adenosyl-L-methionine-dependent methyltransferase
LOC111368018	767.758	0.919975	1.89208	0.15728	5.84927	4.94e-09	2.18e-08	XP_022844949.1	30S_ribosomal_protein_S17,_chloroplastic-like	Olive	PF00366:Ribosomal_protein_S17
LOC111368021	3173.14	1.81885	3.52799	0.144908	12.5517	3.89e-36	6.31e-35	XP_022844952.1	chlorophyll_a-b_binding_protein_4,_chloroplastic-like	Olive	PF00504:Chlorophyll_A-B_binding_protein	IPR016024:Armadillo-type fold//IPR011989:Armadillo-like helical
LOC111368022	668.617	0.596703	1.51226	0.127265	4.68867	2.75e-06	9.16e-06	XP_022844955.1	cyclic_nucleotide-gated_ion_channel_17-like	Olive	PF00520:Ion_transport_protein//PF00027:Cyclic_nucleotide-binding_domain
LOC111368035	104.483	0.867382	1.82435	0.30023	2.88905	0.00386403	0.00820192	XP_022845087.1	pentatricopeptide_repeat-containing_protein_At1g80150,_mitochondrial-like,_transcript_variant_X2	Olive	PF13041:PPR_repeat_family//PF12854:PPR_repeat	IPR007112:Expansin/pollen allergen, DPBB domain//IPR007117:Expansin, cellulose-binding-like domain//IPR005795:Major pollen allergen Lol pI//IPR036749:Expansin, cellulose-binding-like domain superfamily//IPR036908:RlpA-like domain superfamily//IPR007118:Expansin/Lol pI
LOC111368040	102.876	1.01339	2.01865	0.292045	3.46998	0.000520495	0.00127604	XP_022844972.1	transcription_factor_TCP14-like,_transcript_variant_X2	Olive	PF03634:TCP_family_transcription_factor
LOC111368051	778.982	1.004	2.00556	0.145147	6.91714	4.61e-12	2.56e-11	XP_022844996.1	myb-like_protein_X,_transcript_variant_X2	Olive	PF08766:DEK_C_terminal_domain	IPR036047:F-box-like domain superfamily
LOC111368052	592.42	0.468359	1.38353	0.132018	3.54768	0.000388633	0.00097219	XP_022844998.1	DNA-directed_RNA_polymerase_V_subunit_7,_transcript_variant_X2	Olive	PF03876:SHS2_domain_found_in_N_terminus_of_Rpb7p/Rpc25p/MJ0397	IPR032675:Leucine-rich repeat domain superfamily
LOC111368057	656.59	0.353257	1.27744	0.148144	2.38455	0.0171001	0.031946	XP_022845002.1	uncharacterized_LOC111368057	Olive	PF04781:Protein_of_unknown_function_(DUF627)//PF00443:Ubiquitin_carboxyl-terminal_hydrolase//PF04780:Protein_of_unknown_function_(DUF629)	IPR029752:D-isomer specific 2-hydroxyacid dehydrogenase, NAD-binding domain conserved site 1//IPR036291:NAD(P)-binding domain superfamily
LOC111368075	158.047	2.39585	5.26287	0.354865	6.75143	1.46e-11	7.84e-11	XP_022845036.1	uncharacterized_protein_Cbei_0202	Olive
LOC111368077	483.176	0.554355	1.46851	0.15435	3.59154	0.000328724	0.000831352	XP_022845034.1	DNA_repair_protein_UVH3-like	Olive	PF00867:XPG_I-region
LOC111368079	243.163	1.02915	2.04082	0.201572	5.10563	3.3e-07	1.22e-06	XP_022845037.1	xyloglucan_glycosyltransferase_4-like	Olive	PF13641:Glycosyltransferase_like_family_2	IPR016161:Aldehyde/histidinol dehydrogenase//IPR016162:Aldehyde dehydrogenase, N-terminal//IPR016163:Aldehyde dehydrogenase, C-terminal//IPR012394:Aldehyde dehydrogenase NAD(P)-dependent
LOC111368080	208.026	1.1347	2.19573	0.198787	5.7081	1.14e-08	4.88e-08	XP_022845038.1	peroxidase_31-like	Olive	PF00141:Peroxidase
LOC111368096	221.599	1.44986	2.73182	0.200728	7.22301	5.09e-13	3e-12	XP_022845059.1	putative_late_blight_resistance_protein_homolog_R1A-10	Olive	PF18052:Rx_N-terminal_domain//PF00931:NB-ARC_domain	IPR004827:Basic-leucine zipper domain
LOC111368097	133.184	1.44781	2.72794	0.291492	4.96691	6.8e-07	2.43e-06	XP_022845063.1	phosphatidylinositol_transfer_protein_CSR1-like,_transcript_variant_X3	Olive	PF00650:CRAL/TRIO_domain	IPR033469:CYTH-like domain superfamily
LOC111368102	279.571	0.600147	1.51587	0.188152	3.1897	0.00142421	0.00325501	XP_022845074.1	protein_MICRORCHIDIA_6,_transcript_variant_X3	Olive	PF17942:Morc6_ribosomal_protein_S5_domain_2-like//PF13589:Histidine_kinase-,_DNA_gyrase_B-,_and_HSP90-like_ATPase	IPR037104:Annexin superfamily//IPR009118:Annexin D, plant//IPR018502:Annexin repeat
LOC111368103	1024.44	1.8464	3.59602	0.130335	14.1666	1.47e-45	3.18e-44	XP_022845078.1	uncharacterized_LOC111368103,_transcript_variant_X3	Olive		IPR003165:Piwi domain//IPR036397:Ribonuclease H superfamily//IPR012337:Ribonuclease H-like superfamily
LOC111368104	218.466	1.48846	2.8059	0.202407	7.35381	1.93e-13	1.17e-12	XP_022845079.1	anthranilate_phosphoribosyltransferase,_chloroplastic-like	Olive	PF02885:Glycosyl_transferase_family,_helical_bundle_domain//PF00591:Glycosyl_transferase_family,_a/b_domain	IPR033140:Lipase, GDXG, putative serine active site//IPR029058:Alpha/Beta hydrolase fold
LOC111368105	687.517	0.653604	1.57309	0.152322	4.29094	1.78e-05	5.35e-05	XP_022845080.1	U3_small_nucleolar_ribonucleoprotein_protein_MPP10-like	Olive	PF04006:Mpp10_protein	IPR000313:PWWP domain
LOC111368110	97.7109	1.35047	2.54996	0.29842	4.52541	6.03e-06	1.92e-05	XP_022845093.1	translation_initiation_factor_IF3-2,_chloroplastic-like	Olive	PF05198:Translation_initiation_factor_IF-3,_N-terminal_domain//PF00707:Translation_initiation_factor_IF-3,_C-terminal_domain	IPR009057:Homeobox-like domain superfamily//IPR001005:SANT/Myb domain//IPR017930:Myb domain
LOC111368111	631.733	1.25102	2.3801	0.245268	5.10065	3.38e-07	1.25e-06	XP_022845095.1	serine/threonine-protein_kinase_ATM,_transcript_variant_X7	Olive	PF00454:Phosphatidylinositol_3-_and_4-kinase//PF02260:FATC_domain//PF02259:FAT_domain	IPR018221:Glycoside hydrolase family 9, His active site//IPR008928:Six-hairpin glycosidase superfamily//IPR012341:Six-hairpin glycosidase-like superfamily
LOC111368112	641.849	0.867342	1.8243	0.140555	6.17084	6.79e-10	3.21e-09	XP_022845097.1	uncharacterized_LOC111368112,_transcript_variant_X2	Olive	PF00855:PWWP_domain
LOC111368121	158.187	0.645797	1.5646	0.222318	2.90483	0.00367452	0.00782881		uncharacterized_LOC111368121,_transcript_variant_X2	Olive		IPR036291:NAD(P)-binding domain superfamily
LOC111368124	549.175	0.567588	1.48204	0.188008	3.01895	0.00253649	0.00555783	XP_022845107.1	protein_NUCLEAR_FUSION_DEFECTIVE_2	Olive	PF14622:Ribonuclease-III-like	IPR011011:Zinc finger, FYVE/PHD-type
LOC111368128	377.683	0.819505	1.7648	0.158522	5.16966	2.35e-07	8.79e-07	XP_022845119.1	pentatricopeptide_repeat-containing_protein_At1g79540,_transcript_variant_X5	Olive	PF01535:PPR_repeat//PF12854:PPR_repeat//PF13041:PPR_repeat_family	IPR036047:F-box-like domain superfamily//IPR019494:FIST, C-domain
LOC111368130	142.771	1.24934	2.37733	0.245885	5.08101	3.75e-07	1.38e-06	XP_022845121.1	LIM_domain-containing_protein_WLIM1-like	Olive	PF00412:LIM_domain	IPR012677:Nucleotide-binding alpha-beta plait domain superfamily//IPR000504:RNA recognition motif domain//IPR035979:RNA-binding domain superfamily
LOC111368142	97.2817	2.10659	4.30671	0.301555	6.98576	2.83e-12	1.59e-11	XP_022845140.1	E2F_transcription_factor-like_E2FE	Olive	PF02319:E2F/DP_family_winged-helix_DNA-binding_domain
LOC111368143	225.595	1.29623	2.45586	0.218487	5.93275	2.98e-09	1.34e-08	XP_022845142.1	anaphase-promoting_complex_subunit_8,_transcript_variant_X2	Olive	PF13181:Tetratricopeptide_repeat//PF04049:Anaphase_promoting_complex_subunit_8_/_Cdc23//PF13414:TPR_repeat//PF13176:Tetratricopeptide_repeat	IPR019786:Zinc finger, PHD-type, conserved site//IPR011011:Zinc finger, FYVE/PHD-type//IPR013083:Zinc finger, RING/FYVE/PHD-type//IPR001965:Zinc finger, PHD-type//IPR019787:Zinc finger, PHD-finger
LOC111368151	69.2279	1.72183	3.29855	0.364826	4.7196	2.36e-06	7.95e-06	XP_022845149.1	probable_inactive_heme_oxygenase_2,_chloroplastic,_transcript_variant_X2	Olive		IPR000727:Target SNARE coiled-coil homology domain
LOC111368158	1070.91	1.04334	2.061	0.135574	7.69573	1.41e-14	9.19e-14	XP_022845161.1	classical_arabinogalactan_protein_4-like	Olive		IPR015875:IMP dehydrogenase / GMP reductase, conserved site//IPR005990:Inosine-5'-monophosphate dehydrogenase//IPR001093:IMP dehydrogenase/GMP reductase
LOC111368160	1988.08	0.410311	1.32897	0.132475	3.09727	0.00195314	0.00436481	XP_022845205.1	T-complex_protein_1_subunit_delta	Olive	PF00118:TCP-1/cpn60_chaperonin_family	IPR029000:Cyclophilin-like domain superfamily//IPR024936:Cyclophilin-type peptidyl-prolyl cis-trans isomerase//IPR002130:Cyclophilin-type peptidyl-prolyl cis-trans isomerase domain//IPR020892:Cyclophilin-type peptidyl-prolyl cis-trans isomerase, conserved site
LOC111368171	86.2158	0.772265	1.70795	0.300578	2.56927	0.0101914	0.0199877			Olive
LOC111368174	363.675	0.435352	1.35224	0.174903	2.4891	0.0128067	0.0246017	XP_022845184.1	probable_anion_transporter_5	Olive	PF07690:Major_Facilitator_Superfamily
LOC111368179	130.073	0.953268	1.93625	0.243936	3.90786	9.31e-05	0.000255168	XP_022845190.1	G-type_lectin_S-receptor-like_serine/threonine-protein_kinase_SD2-5	Olive	PF00069:Protein_kinase_domain//PF01453:D-mannose_binding_lectin	IPR014977:WRC domain//IPR014978:Glutamine-Leucine-Glutamine, QLQ
LOC111368186	313.973	0.849586	1.80198	0.258091	3.29181	0.000995448	0.00233572	XP_022845200.1	60S_ribosomal_protein_L34-like	Olive	PF01199:Ribosomal_protein_L34e
LOC111368188	1154.67	2.36139	5.13865	0.141537	16.6839	1.72e-62	5.51e-61	XP_022845204.1	aspartyl_protease_family_protein_At5g10770-like,_transcript_variant_X2	Olive	PF14543:Xylanase_inhibitor_N-terminal//PF14541:Xylanase_inhibitor_C-terminal
LOC111368194	762.16	0.504682	1.41881	0.13306	3.79288	0.000148911	0.000396016	XP_022845216.1	uncharacterized_LOC111368194,_transcript_variant_X3	Olive	PF02129:X-Pro_dipeptidyl-peptidase_(S15_family)	IPR036514:SGNH hydrolase superfamily//IPR035669:GDSL lipase/esterase-like, plant
LOC111368196	554.234	1.49385	2.8164	0.221792	6.73535	1.64e-11	8.72e-11	XP_022845221.1	glucose-1-phosphate_adenylyltransferase_small_subunit,_chloroplastic/amyloplastic-like,_transcript_variant_X4	Olive	PF00483:Nucleotidyl_transferase
LOC111368223	1483.75	0.393163	1.31327	0.171185	2.29671	0.0216355	0.0395253	XP_022845244.1	leucine_aminopeptidase_2,_chloroplastic-like,_transcript_variant_X2	Olive	PF02789:Cytosol_aminopeptidase_family,_N-terminal_domain//PF00883:Cytosol_aminopeptidase_family,_catalytic_domain	IPR000719:Protein kinase domain//IPR003591:Leucine-rich repeat, typical subtype//IPR011009:Protein kinase-like domain superfamily//IPR032675:Leucine-rich repeat domain superfamily
LOC111368259	323.479	1.03048	2.04271	0.178396	5.77638	7.63e-09	3.31e-08	XP_022845267.1	uncharacterized_LOC111368259	Olive	PF05910:Plant_protein_of_unknown_function_(DUF868)
LOC111368291	188.574	3.4596	11.0013	0.283864	12.1875	3.62e-34	5.52e-33	XP_022845303.1	thylakoid_lumenal_16.5_kDa_protein,_chloroplastic-like,_transcript_variant_X2	Olive		IPR023393:START-like domain superfamily//IPR015310:Activator of Hsp90 ATPase, N-terminal//IPR036338:Activator of Hsp90 ATPase, Aha1
LOC111368303	322.959	2.24787	4.7498	0.181197	12.4056	2.44e-35	3.84e-34			Olive		IPR013087:Zinc finger C2H2-type//IPR036236:Zinc finger C2H2 superfamily
LOC111368307	238.593	0.634393	1.55228	0.194866	3.25554	0.00113178	0.00263173	XP_022845308.1	uncharacterized_LOC111368307	Olive		IPR017937:Thioredoxin, conserved site//IPR036249:Thioredoxin-like superfamily//IPR013766:Thioredoxin domain//IPR036356:Endoplasmic reticulum resident protein 29, C-terminal domain superfamily//IPR005788:Disulphide isomerase//IPR011679:Endoplasmic reticulum resident protein 29, C-terminal
LOC111368316	570.728	1.03898	2.05478	0.166505	6.23995	4.38e-10	2.1e-09	XP_022845453.1	ethylene-responsive_transcription_factor_WIN1-like,_transcript_variant_X3	Olive	PF00847:AP2_domain
LOC111368321	181.219	0.565845	1.48025	0.203748	2.77718	0.00548329	0.0113371	XP_022845319.1	lysine-specific_demethylase_JMJ25-like	Olive	PF10497:Zinc-finger_domain_of_monoamine-oxidase_A_repressor_R1//PF08879:WRC	IPR011990:Tetratricopeptide-like helical domain superfamily
LOC111368333	1400.51	4.83928	28.6265	0.200126	24.1812	3.51e-129	3.21e-127	XP_022845331.1	36.4_kDa_proline-rich_protein-like	Olive	PF14547:Hydrophobic_seed_protein	IPR000232:Heat shock factor (HSF)-type, DNA-binding//IPR036390:Winged helix DNA-binding domain superfamily//IPR036388:Winged helix-like DNA-binding domain superfamily
LOC111368337	272.126	0.818892	1.76405	0.226466	3.61595	0.000299244	0.000761895	XP_022845336.1	N-alpha-acetyltransferase_35,_NatC_auxiliary_subunit	Olive	PF04112:Mak10_subunit,_NatC_N(alpha)-terminal_acetyltransferase	IPR029069:HotDog domain superfamily
LOC111368346	153.074	1.23483	2.35354	0.286268	4.31354	1.61e-05	4.86e-05	XP_022845348.1	nucleolin-like	Olive		IPR023213:Chloramphenicol acetyltransferase-like domain superfamily
LOC111368355	421.344	1.31529	2.48852	0.151578	8.67727	4.05e-18	3.21e-17	XP_022845357.1	heparanase-like_protein_3	Olive	PF03662:Glycosyl_hydrolase_family_79,_N-terminal_domain	IPR029063:S-adenosyl-L-methionine-dependent methyltransferase//IPR042086:Methyltransferase, alpha-helical capping domain
LOC111368356	110.479	0.647434	1.56638	0.256008	2.52896	0.0114401	0.022212		protein_FIZZY-RELATED_2-like	Olive
LOC111368358	678.471	0.996677	1.9954	0.154222	6.46262	1.03e-10	5.19e-10		phospholipase_D_beta_1-like	Olive		IPR036047:F-box-like domain superfamily//IPR017451:F-box associated interaction domain//IPR001810:F-box domain
LOC111368364	227.964	0.756658	1.68957	0.205886	3.67513	0.000237731	0.000614207	XP_022845361.1	transcription_factor_BIM1-like	Olive	PF00010:Helix-loop-helix_DNA-binding_domain
LOC111368428	2014.6	1.94633	3.85394	0.124628	15.6171	5.57e-55	1.52e-53	XP_022845421.1	histone_H2B.3-like	Olive	PF00125:Core_histone_H2A/H2B/H3/H4
LOC111368438	2581.91	1.92239	3.7905	0.121693	15.797	3.26e-56	9.17e-55	XP_022845431.1	histone_H2B-like	Olive	PF00125:Core_histone_H2A/H2B/H3/H4	IPR005707:Ribosomal protein S2, eukaryotic/archaeal//IPR001865:Ribosomal protein S2//IPR023591:Ribosomal protein S2, flavodoxin-like domain superfamily//IPR027498:Ribosomal protein S2, eukaryotic//IPR018130:Ribosomal protein S2, conserved site
LOC111368450	342.598	0.355447	1.27938	0.160494	2.21471	0.0267802	0.0477137	XP_022845437.1	E3_ubiquitin-protein_ligase_RHA1B-like	Olive	PF13639:Ring_finger_domain
LOC111368462	96.0122	1.25923	2.39369	0.30036	4.19242	2.76e-05	8.11e-05		uncharacterized_LOC111368462,_transcript_variant_X2	Olive
LOC111368468	65.6227	1.21594	2.32292	0.343676	3.53805	0.000403093	0.00100552	XP_022845480.1	squamosa_promoter-binding_protein_1-like	Olive	PF03110:SBP_domain	IPR043502:DNA/RNA polymerase superfamily
LOC111368472	664.219	3.02398	8.1341	0.203184	14.883	4.25e-50	1.03e-48	XP_022845485.1	uncharacterized_LOC111368472	Olive	PF13867:Sin3_binding_region_of_histone_deacetylase_complex_subunit_SAP30
LOC111368474	298.527	1.20147	2.29974	0.186929	6.42743	1.3e-10	6.49e-10	XP_022845528.1	uncharacterized_membrane_protein_At1g16860-like,_transcript_variant_X5	Olive		IPR019734:Tetratricopeptide repeat//IPR011990:Tetratricopeptide-like helical domain superfamily//IPR006636:Heat shock chaperonin-binding//IPR013026:Tetratricopeptide repeat-containing domain
LOC111368475	137.074	1.42871	2.69207	0.250747	5.69783	1.21e-08	5.17e-08	XP_022845491.1	uncharacterized_LOC111368475,_transcript_variant_X2	Olive	PF13676:TIR_domain	IPR011990:Tetratricopeptide-like helical domain superfamily//IPR019734:Tetratricopeptide repeat//IPR000744:NSF attachment protein//IPR013026:Tetratricopeptide repeat-containing domain
LOC111368480	399.011	0.501765	1.41594	0.180851	2.77446	0.00552927	0.0114265	XP_022845500.1	glutamate--cysteine_ligase,_chloroplastic-like	Olive	PF04107:Glutamate-cysteine_ligase_family_2(GCS2)
LOC111368481	443.588	1.96866	3.91403	0.173063	11.3754	5.55e-30	7.31e-29	XP_022845503.1	probable_serine/threonine-protein_kinase_At5g41260,_transcript_variant_X2	Olive	PF07714:Protein_tyrosine_kinase	IPR036291:NAD(P)-binding domain superfamily
LOC111368482	209.867	0.946033	1.92657	0.199353	4.74551	2.08e-06	7.05e-06	XP_022845504.1	tubulin_beta_chain-like	Olive	PF03953:Tubulin_C-terminal_domain//PF00091:Tubulin/FtsZ_family,_GTPase_domain
LOC111368484	308.524	0.437665	1.35441	0.179258	2.44153	0.0146251	0.0277431	XP_022845506.1	probable_glutathione_peroxidase_8	Olive	PF00255:Glutathione_peroxidase
LOC111368488	4314.45	1.37274	2.58962	0.14143	9.70614	2.84e-22	2.75e-21	XP_022845513.1	tubulin_beta-2_chain-like	Olive	PF00091:Tubulin/FtsZ_family,_GTPase_domain//PF03953:Tubulin_C-terminal_domain	IPR006936:ALOG domain
LOC111368489	240.275	0.69046	1.6138	0.18483	3.73565	0.000187227	0.00049112	XP_022845518.1	probable_LRR_receptor-like_serine/threonine-protein_kinase_At1g63430,_transcript_variant_X6	Olive	PF08263:Leucine_rich_repeat_N-terminal_domain//PF07714:Protein_tyrosine_kinase	IPR005175:PPC domain
LOC111368490	812.095	0.723669	1.65138	0.122281	5.91807	3.26e-09	1.46e-08	XP_022845521.1	RNA-binding_protein_NOB1,_transcript_variant_X2	Olive	PF17146:PIN_domain_of_ribonuclease	IPR035892:C2 domain superfamily//IPR000008:C2 domain//IPR031468:Synaptotagmin-like mitochondrial-lipid-binding domain
LOC111368493	974.196	1.14697	2.21448	0.118899	9.64658	5.08e-22	4.86e-21	XP_022845526.1	protein_IQ-DOMAIN_14-like	Olive	PF13178:Protein_of_unknown_function_(DUF4005)//PF00612:IQ_calmodulin-binding_motif
LOC111368495	73.9305	2.85772	7.2487	0.398524	7.17076	7.46e-13	4.35e-12	XP_022845529.1	uncharacterized_LOC111368495	Olive	PF06749:Protein_of_unknown_function_(DUF1218)
LOC111368503	116.949	1.18687	2.27658	0.275255	4.31189	1.62e-05	4.89e-05	XP_022845538.1	cyclin-U1-1-like	Olive	PF08613:Cyclin
LOC111368504	1161.82	1.06277	2.08894	0.142174	7.47518	7.71e-14	4.78e-13	XP_022845539.1	adoMet-dependent_rRNA_methyltransferase_spb1-like	Olive	PF01728:FtsJ-like_methyltransferase//PF11861:Domain_of_unknown_function_(DUF3381)//PF07780:Spb1_C-terminal_domain	IPR036047:F-box-like domain superfamily//IPR011043:Galactose oxidase/kelch, beta-propeller//IPR015915:Kelch-type beta propeller//IPR001810:F-box domain
LOC111368505	412.642	1.49065	2.81015	0.181908	8.1945	2.52e-16	1.81e-15	XP_022845541.1	peroxidase_3-like	Olive	PF00141:Peroxidase	IPR011990:Tetratricopeptide-like helical domain superfamily//IPR019734:Tetratricopeptide repeat//IPR001179:FKBP-type peptidyl-prolyl cis-trans isomerase domain//IPR013026:Tetratricopeptide repeat-containing domain
LOC111368509	341.39	0.636717	1.55479	0.200383	3.1775	0.00148553	0.00338505	XP_022845548.1	probable_inactive_tRNA-specific_adenosine_deaminase-like_protein_3,_transcript_variant_X3	Olive	PF00383:Cytidine_and_deoxycytidylate_deaminase_zinc-binding_region
LOC111368512	754.913	0.744714	1.67564	0.123313	6.0392	1.55e-09	7.13e-09	XP_022845553.1	60S_ribosomal_protein_L11-like	Olive	PF00281:Ribosomal_protein_L5//PF00673:ribosomal_L5P_family_C-terminus
LOC111368526	248.337	2.03902	4.10967	0.205766	9.9094	3.79e-23	3.81e-22	XP_022845573.1	staphylococcal-like_nuclease_CAN2	Olive	PF00565:Staphylococcal_nuclease_homologue	IPR011684:Protein Networked (NET), actin-binding (NAB) domain
LOC111368527	607.857	0.402314	1.32163	0.170436	2.3605	0.0182503	0.0338636	XP_022845574.1	staphylococcal-like_nuclease_CAN2	Olive	PF00565:Staphylococcal_nuclease_homologue
LOC111368531	140.021	1.10024	2.1439	0.275803	3.98922	6.63e-05	0.000185509	XP_022845581.1	uncharacterized_LOC111368531	Olive	PF02485:Core-2/I-Branching_enzyme	IPR036167:tRNA intron endonuclease, catalytic domain-like superfamily//IPR011856:tRNA endonuclease-like domain superfamily
LOC111368533	144.165	0.907848	1.87624	0.238997	3.79857	0.000145535	0.000387744	XP_022845585.1	uncharacterized_protein_C6G9.01c,_transcript_variant_X3	Olive	PF08576:Eukaryotic_protein_of_unknown_function_(DUF1764)	IPR032710:NTF2-like domain superfamily
LOC111368555	173.772	3.02249	8.12568	0.267681	11.2914	1.45e-29	1.89e-28	XP_022845632.1	uncharacterized_LOC111368555	Olive
LOC111368558	237.336	0.667635	1.58847	0.205438	3.24981	0.00115484	0.00268184	XP_022845639.1	endonuclease_MutS2,_transcript_variant_X3	Olive	PF01713:Smr_domain
LOC111368564	124.452	0.916271	1.88723	0.281904	3.2503	0.00115284	0.0026785	XP_022845647.1	pentatricopeptide_repeat-containing_protein_At3g24000,_mitochondrial	Olive	PF01535:PPR_repeat//PF13041:PPR_repeat_family//PF14432:DYW_family_of_nucleic_acid_deaminases	IPR014002:Agenet domain, plant type
LOC111368566	367.734	0.750287	1.68213	0.224557	3.34118	0.000834229	0.00198416	XP_022845650.1	thiosulfate/3-mercaptopyruvate_sulfurtransferase_1,_mitochondrial-like,_transcript_variant_X2	Olive	PF00581:Rhodanese-like_domain	IPR003593:AAA+ ATPase domain//IPR003960:ATPase, AAA-type, conserved site//IPR027417:P-loop containing nucleoside triphosphate hydrolase
LOC111368567	69.1704	1.06316	2.0895	0.339362	3.13281	0.00173139	0.00390036			Olive
LOC111368568	4109.54	1.01466	2.02043	0.143364	7.07753	1.47e-12	8.42e-12	XP_022845651.1	phosphoglycerate_kinase,_chloroplastic	Olive	PF00162:Phosphoglycerate_kinase
LOC111368581	499.12	2.53043	5.77743	0.162701	15.5527	1.53e-54	4.13e-53	XP_022845679.1	stem-specific_protein_TSJT1-like	Olive	PF12481:Aluminium_induced_protein	IPR019775:WD40 repeat, conserved site//IPR017986:WD40-repeat-containing domain//IPR001680:WD40 repeat//IPR015943:WD40/YVTN repeat-like-containing domain superfamily//IPR036322:WD40-repeat-containing domain superfamily
LOC111368591	57.1134	1.34291	2.53663	0.379476	3.53887	0.000401849	0.00100271	XP_022845697.1	chaperone_protein_dnaJ_11,_chloroplastic-like	Olive	PF00226:DnaJ_domain	IPR011598:Myc-type, basic helix-loop-helix (bHLH) domain//IPR036638:Helix-loop-helix DNA-binding domain superfamily
LOC111368599	842.008	2.41611	5.33729	0.138567	17.4364	4.36e-68	1.54e-66	XP_022845709.1	indole-3-acetic_acid-amido_synthetase_GH3.10,_transcript_variant_X2	Olive	PF03321:GH3_auxin-responsive_promoter	IPR001611:Leucine-rich repeat//IPR017441:Protein kinase, ATP binding site//IPR000719:Protein kinase domain//IPR008271:Serine/threonine-protein kinase, active site//IPR003591:Leucine-rich repeat, typical subtype//IPR011009:Protein kinase-like domain superfamily//IPR032675:Leucine-rich repeat domain superfamily
LOC111368607	95.1456	3.93506	15.2957	0.416409	9.44998	3.39e-21	3.11e-20	XP_022845722.1	ethylene-responsive_transcription_factor_ERF003-like	Olive	PF00847:AP2_domain
LOC111368609	80.0743	1.31705	2.49157	0.31202	4.22106	2.43e-05	7.2e-05	XP_022845726.1	probable_receptor-like_protein_kinase_At1g80640,_transcript_variant_X2	Olive	PF00069:Protein_kinase_domain	IPR037231:NAP-like superfamily
LOC111368618	362.367	0.469077	1.38422	0.154288	3.04027	0.00236363	0.00520981	XP_022845738.1	tubulin--tyrosine_ligase-like_protein_12	Olive	PF03133:Tubulin-tyrosine_ligase_family	IPR015884:Malic enzyme, conserved site//IPR036291:NAD(P)-binding domain superfamily//IPR037062:Malic enzyme, N-terminal domain superfamily//IPR012301:Malic enzyme, N-terminal domain//IPR012302:Malic enzyme, NAD-binding//IPR001891:Malic oxidoreductase
LOC111368621	5536.71	0.296464	1.22813	0.0999458	2.96625	0.00301455	0.00651557	XP_022845741.1	subtilisin-like_protease_SBT1.8	Olive	PF02225:PA_domain//PF05922:Peptidase_inhibitor_I9//PF00082:Subtilase_family//PF17766:Fibronectin_type-III_domain
LOC111368626	59.2012	1.63151	3.09838	0.381343	4.27834	1.88e-05	5.65e-05	XP_022845746.1	uncharacterized_LOC111368626,_transcript_variant_X2	Olive		IPR019787:Zinc finger, PHD-finger//IPR001965:Zinc finger, PHD-type//IPR011011:Zinc finger, FYVE/PHD-type//IPR019786:Zinc finger, PHD-type, conserved site//IPR013083:Zinc finger, RING/FYVE/PHD-type
LOC111368629	762.491	1.66409	3.16915	0.132966	12.5152	6.16e-36	9.92e-35	XP_022845750.1	transcription_factor_MYB16-like	Olive	PF00249:Myb-like_DNA-binding_domain
LOC111368631	299.412	0.583024	1.49799	0.171041	3.40867	0.000652793	0.00157784	XP_022845752.1	vacuolar_protein-sorting-associated_protein_33_homolog,_transcript_variant_X2	Olive	PF00995:Sec1_family
LOC111368638	600.225	0.749216	1.68088	0.139089	5.38658	7.18e-08	2.83e-07	XP_022845766.1	pentatricopeptide_repeat-containing_protein_At1g60770	Olive	PF01535:PPR_repeat//PF13812:Pentatricopeptide_repeat_domain	IPR001781:Zinc finger, LIM-type
LOC111368650	114.382	1.33652	2.52542	0.292887	4.56327	5.04e-06	1.62e-05	XP_022845787.1	cell_division_control_protein_2_homolog_A-like,_transcript_variant_X2	Olive	PF00069:Protein_kinase_domain	IPR036576:WRKY domain superfamily//IPR003657:WRKY domain
LOC111368652	72.2387	1.93456	3.82263	0.345433	5.60041	2.14e-08	8.9e-08	XP_022845788.1	amino_acid_permease_8-like	Olive	PF01490:Transmembrane_amino_acid_transporter_protein	IPR042460:DCN1-like, PONY binding domain//IPR005176:Potentiating neddylation domain
LOC111368653	1056.77	0.611414	1.52776	0.157575	3.88015	0.000104393	0.000283818	XP_022845790.1	ATP-dependent_6-phosphofructokinase_6-like	Olive	PF00365:Phosphofructokinase
LOC111368655	1129.54	0.51562	1.42961	0.123409	4.17813	2.94e-05	8.61e-05	XP_022845794.1	uncharacterized_LOC111368655,_transcript_variant_X3	Olive		IPR016024:Armadillo-type fold
LOC111368658	889.06	1.19182	2.2844	0.147953	8.05535	7.93e-16	5.55e-15	XP_022845801.1	uncharacterized_LOC111368658,_transcript_variant_X2	Olive
LOC111368663	2143.78	1.23963	2.36138	0.106562	11.633	2.8e-31	3.89e-30	XP_022845810.1	magnesium-chelatase_subunit_ChlI,_chloroplastic-like,_transcript_variant_X2	Olive	PF17863:AAA_lid_domain//PF01078:Magnesium_chelatase,_subunit_ChlI	IPR017930:Myb domain//IPR009057:Homeobox-like domain superfamily//IPR006447:Myb domain, plants
LOC111368664	239.003	3.85263	14.4463	0.268327	14.358	9.5e-47	2.11e-45	XP_022845811.1	protein_CHUP1,_chloroplastic-like	Olive		IPR036188:FAD/NAD(P)-binding domain superfamily
LOC111368669	93.1387	3.35927	10.2622	0.399148	8.4161	3.89e-17	2.94e-16	XP_022845819.1	abscisic_acid_receptor_PYL12-like	Olive	PF10604:Polyketide_cyclase_/_dehydrase_and_lipid_transport
LOC111368674	117.484	0.624977	1.54219	0.269551	2.31859	0.0204175	0.0374943	XP_022845826.1	BES1/BZR1_homolog_protein_4-like,_transcript_variant_X2	Olive	PF05687:BES1/BZR1_plant_transcription_factor,_N-terminal	IPR016024:Armadillo-type fold//IPR011989:Armadillo-like helical
LOC111368681	676.579	0.538998	1.45296	0.194394	2.77272	0.00555907	0.0114789	XP_022845843.1	nuclear_transcription_factor_Y_subunit_A-7-like,_transcript_variant_X2	Olive	PF02045:CCAAT-binding_transcription_factor_(CBF-B/NF-YA)_subunit_B	IPR001623:DnaJ domain//IPR036869:Chaperone J-domain superfamily
LOC111368683	1213.68	0.32505	1.25271	0.13083	2.48452	0.0129725	0.0248917	XP_022845844.1	obg-like_ATPase_1	Olive	PF06071:Protein_of_unknown_function_(DUF933)//PF01926:50S_ribosome-binding_GTPase	IPR000164:Histone H3/CENP-A//IPR009072:Histone-fold
LOC111368684	1404.84	2.02241	4.06261	0.127536	15.8576	1.25e-56	3.53e-55	XP_022845845.1	probable_LRR_receptor-like_serine/threonine-protein_kinase_At4g20940	Olive	PF13855:Leucine_rich_repeat//PF08263:Leucine_rich_repeat_N-terminal_domain//PF07714:Protein_tyrosine_kinase//PF13516:Leucine_Rich_repeat
LOC111368685	155.587	0.50477	1.4189	0.224488	2.24854	0.0245417	0.0441749	XP_022845849.1	probable_3-hydroxyisobutyrate_dehydrogenase,_mitochondrial,_transcript_variant_X7	Olive	PF03446:NAD_binding_domain_of_6-phosphogluconate_dehydrogenase//PF14833:NAD-binding_of_NADP-dependent_3-hydroxyisobutyrate_dehydrogenase	IPR012946:X8 domain
LOC111368686	346.549	0.568024	1.48249	0.181564	3.1285	0.00175699	0.00395537	XP_022845875.1	replication_protein_A_32_kDa_subunit_B,_transcript_variant_X4	Olive	PF01336:OB-fold_nucleic_acid_binding_domain	IPR011598:Myc-type, basic helix-loop-helix (bHLH) domain//IPR036638:Helix-loop-helix DNA-binding domain superfamily
LOC111368690	546.757	0.932065	1.90801	0.179767	5.18486	2.16e-07	8.13e-07	XP_022845855.1	twinkle_homolog_protein,_chloroplastic/mitochondrial,_transcript_variant_X3	Olive	PF13662:Toprim_domain	IPR002885:Pentatricopeptide repeat//IPR011990:Tetratricopeptide-like helical domain superfamily
LOC111368691	435.506	0.972423	1.96213	0.173638	5.60029	2.14e-08	8.91e-08	XP_022845861.1	cysteine-rich_receptor-like_protein_kinase_25,_transcript_variant_X5	Olive	PF01657:Salt_stress_response/antifungal//PF07714:Protein_tyrosine_kinase	IPR027417:P-loop containing nucleoside triphosphate hydrolase//IPR036277:SMCs flexible hinge superfamily//IPR041738:Structural maintenance of chromosomes 4, ABC domain, eukaryotic//IPR010935:SMCs flexible hinge//IPR024704:Structural maintenance of chromosomes protein
LOC111368694	156.091	1.43131	2.69692	0.280824	5.09684	3.45e-07	1.27e-06	XP_022845865.1	twinkle_homolog_protein,_chloroplastic/mitochondrial-like	Olive
LOC111368695	179.541	0.849504	1.80188	0.218481	3.88823	0.000100977	0.000275328	XP_022845867.1	twinkle_homolog_protein,_chloroplastic/mitochondrial-like	Olive		IPR004732:Transaldolase type 2//IPR013785:Aldolase-type TIM barrel//IPR018225:Transaldolase, active site
LOC111368696	289.827	1.42448	2.68418	0.193812	7.3498	1.99e-13	1.2e-12	XP_022845868.1	primase_homolog_protein-like	Olive	PF13662:Toprim_domain
LOC111368699	743.82	2.50829	5.68945	0.142501	17.602	2.38e-69	8.62e-68	XP_022845874.1	subtilisin-like_protease_SBT2.2	Olive	PF00082:Subtilase_family//PF17766:Fibronectin_type-III_domain//PF05922:Peptidase_inhibitor_I9	IPR000719:Protein kinase domain//IPR032675:Leucine-rich repeat domain superfamily//IPR011009:Protein kinase-like domain superfamily
LOC111368703	158.257	0.825252	1.77184	0.218489	3.77709	0.000158668	0.000420502	XP_022845878.1	pentatricopeptide_repeat-containing_protein_At4g21300,_transcript_variant_X2	Olive	PF13041:PPR_repeat_family//PF01535:PPR_repeat	IPR000595:Cyclic nucleotide-binding domain//IPR014710:RmlC-like jelly roll fold//IPR018490:Cyclic nucleotide-binding-like//IPR036770:Ankyrin repeat-containing domain superfamily//IPR002110:Ankyrin repeat//IPR003938:Potassium channel, voltage-dependent, EAG/ELK/ERG//IPR020683:Ankyrin repeat-containing domain//IPR021789:KHA domain
LOC111368704	443.751	1.02131	2.02976	0.181222	5.63565	1.74e-08	7.32e-08	XP_022845880.1	AP2-like_ethylene-responsive_transcription_factor_At2g41710,_transcript_variant_X2	Olive	PF00847:AP2_domain	IPR023614:Porin domain superfamily
LOC111368705	319.199	2.25597	4.77655	0.182221	12.3804	3.34e-35	5.24e-34	XP_022845881.1	uncharacterized_LOC111368705	Olive		IPR036168:AP-2 complex subunit mu, C-terminal superfamily//IPR028565:Mu homology domain
LOC111368711	53.303	1.78209	3.43925	0.40401	4.41101	1.03e-05	3.19e-05	XP_022845889.1	zinc_finger_protein_ZPR1-like,_transcript_variant_X2	Olive	PF03367:ZPR1_zinc-finger_domain
LOC111368715	177.019	0.822967	1.76904	0.215575	3.81755	0.000134785	0.000360617	XP_022845913.1	fructose-bisphosphate_aldolase-lysine_N-methyltransferase,_chloroplastic,_transcript_variant_X3	Olive	PF00856:SET_domain//PF09273:Rubisco_LSMT_substrate-binding	IPR036047:F-box-like domain superfamily//IPR001810:F-box domain
LOC111368717	988.539	0.7547	1.68728	0.118097	6.39051	1.65e-10	8.2e-10	XP_022845895.1	protein_NAP1	Olive	PF09735:Membrane-associated_apoptosis_protein
LOC111368719	1987.98	0.441044	1.35759	0.120045	3.674	0.000238786	0.000616602	XP_022845900.1	putative_receptor-like_protein_kinase_At4g00960	Olive	PF07714:Protein_tyrosine_kinase//PF01657:Salt_stress_response/antifungal
LOC111368729	315.749	1.61756	3.06857	0.176462	9.16662	4.88e-20	4.25e-19	XP_022845916.1	DAG_protein,_chloroplastic-like,_transcript_variant_X3	Olive
LOC111368732	53.7323	1.14343	2.20906	0.376331	3.03836	0.00237869	0.00523922		uncharacterized_LOC111368732	Olive		IPR000008:C2 domain//IPR035892:C2 domain superfamily//IPR031468:Synaptotagmin-like mitochondrial-lipid-binding domain
LOC111368739	462.233	1.01604	2.02236	0.146286	6.94559	3.77e-12	2.1e-11			Olive		IPR000629:ATP-dependent RNA helicase DEAD-box, conserved site//IPR014001:Helicase superfamily 1/2, ATP-binding domain//IPR001650:Helicase, C-terminal//IPR014014:RNA helicase, DEAD-box type, Q motif//IPR027417:P-loop containing nucleoside triphosphate hydrolase
LOC111368741	213.476	1.59954	3.03046	0.209313	7.64185	2.14e-14	1.38e-13	XP_022845926.1	4-hydroxy-tetrahydrodipicolinate_reductase_2,_chloroplastic-like	Olive	PF05173:Dihydrodipicolinate_reductase,_C-terminus//PF01113:Dihydrodipicolinate_reductase,_N-terminus	IPR031968:VASt domain//IPR000008:C2 domain//IPR004182:GRAM domain//IPR011993:PH-like domain superfamily//IPR035892:C2 domain superfamily
LOC111368743	125.793	0.793626	1.73343	0.348812	2.27523	0.0228923	0.0415058	XP_022845929.1	thioredoxin_domain-containing_protein_PLP3B-like,_transcript_variant_X2	Olive	PF00085:Thioredoxin
LOC111368752	118.396	1.31179	2.48249	0.295568	4.43819	9.07e-06	2.84e-05	XP_022845945.1	50S_ribosomal_protein_L21,_mitochondrial-like	Olive	PF00829:Ribosomal_prokaryotic_L21_protein	IPR036852:Peptidase S8/S53 domain superfamily//IPR015500:Peptidase S8, subtilisin-related//IPR023828:Peptidase S8, subtilisin, Ser-active site//IPR037045:Peptidase S8 propeptide/proteinase inhibitor I9 superfamily//IPR023827:Peptidase S8, subtilisin, Asp-active site//IPR034197:Cucumisin-like catalytic domain
LOC111368757	1792.19	0.332054	1.2588	0.139524	2.37991	0.0173169	0.0323188	XP_022845952.1	RGG_repeats_nuclear_RNA_binding_protein_A-like	Olive	PF09598:Stm1//PF04774:Hyaluronan_/_mRNA_binding_family	IPR027417:P-loop containing nucleoside triphosphate hydrolase//IPR003439:ABC transporter-like//IPR017871:ABC transporter, conserved site
LOC111368767	277.371	0.759088	1.69242	0.205554	3.69289	0.000221718	0.000575532	XP_022845967.1	chaperone_protein_dnaJ_13	Olive	PF11875:Domain_of_unknown_function_(DUF3395)	IPR001938:Thaumatin family//IPR037176:Osmotin/thaumatin-like superfamily//IPR017949:Thaumatin, conserved site
LOC111368769	1107.25	1.69574	3.23944	0.120869	14.0296	1.03e-44	2.16e-43	XP_022845970.1	DELLA_protein_GAI1-like	Olive	PF03514:GRAS_domain_family
LOC111368777	297.114	2.35087	5.10131	0.190486	12.3414	5.42e-35	8.46e-34	XP_022845985.1	flavonoid_3'-monooxygenase-like	Olive	PF00067:Cytochrome_P450
LOC111368789	165.213	0.888629	1.85142	0.221521	4.01148	6.03e-05	0.000169771	XP_022846001.1	probable_aminotransferase_ACS10,_transcript_variant_X3	Olive	PF00155:Aminotransferase_class_I_and_II	IPR001059:Translation elongation factor P/YeiP, central//IPR015365:Elongation factor P, C-terminal//IPR013852:Translation elongation factor P/YeiP, conserved site//IPR008991:Translation protein SH3-like domain superfamily//IPR014722:Ribosomal protein L2, domain 2//IPR012340:Nucleic acid-binding, OB-fold
LOC111368800	1291.5	1.76676	3.40289	0.122584	14.4127	4.3e-47	9.7e-46	XP_022846026.1	glucan_endo-1,3-beta-glucosidase_14-like	Olive	PF00332:Glycosyl_hydrolases_family_17//PF07983:X8_domain	IPR029044:Nucleotide-diphospho-sugar transferases
LOC111368805	131.823	0.817019	1.76176	0.239517	3.41111	0.00064699	0.0015646	XP_022846044.1	uncharacterized_LOC111368805,_transcript_variant_X2	Olive	PF08007:Cupin_superfamily_protein
LOC111368806	274.789	1.85861	3.62658	0.254555	7.30142	2.85e-13	1.71e-12	XP_022846034.1	65-kDa_microtubule-associated_protein_1-like	Olive	PF03999:Microtubule_associated_protein_(MAP65/ASE1_family)	IPR011044:Quinoprotein amine dehydrogenase, beta chain-like//IPR015943:WD40/YVTN repeat-like-containing domain superfamily//IPR017986:WD40-repeat-containing domain
LOC111368808	655.699	0.742863	1.67349	0.147611	5.03257	4.84e-07	1.76e-06	XP_022846038.1	putative_BPI/LBP_family_protein_At1g04970,_transcript_variant_X2	Olive	PF01273:LBP_/_BPI_/_CETP_family,_N-terminal_domain//PF02886:LBP_/_BPI_/_CETP_family,_C-terminal_domain	IPR042099:AMP-dependent synthetase-like superfamily
LOC111368810	882.131	0.707878	1.6334	0.128379	5.51395	3.51e-08	1.43e-07	XP_022846040.1	40S_ribosomal_protein_S8-like,_transcript_variant_X2	Olive	PF01201:Ribosomal_protein_S8e
LOC111368812	421.236	0.781752	1.71922	0.24966	3.13126	0.00174056	0.00391996	XP_022846041.1	mitochondrial_import_inner_membrane_translocase_subunit_TIM22-2	Olive	PF02466:Tim17/Tim22/Tim23/Pmp24_family	IPR027443:Isopenicillin N synthase-like
LOC111368813	283.984	2.63598	6.21597	0.207739	12.6889	6.81e-37	1.13e-35	XP_022846043.1	kinesin-like_protein_KIN-12F,_transcript_variant_X2	Olive	PF00225:Kinesin_motor_domain
LOC111368815	421.51	1.17682	2.26078	0.166581	7.06454	1.61e-12	9.22e-12	XP_022846246.1	MAR-binding_filament-like_protein_1-1,_transcript_variant_X4	Olive
LOC111368818	151.195	1.14179	2.20655	0.229724	4.97027	6.69e-07	2.39e-06	XP_022846050.1	transcription_termination_factor_MTERF9,_chloroplastic-like,_transcript_variant_X3	Olive	PF02536:mTERF	IPR008271:Serine/threonine-protein kinase, active site//IPR000719:Protein kinase domain//IPR011009:Protein kinase-like domain superfamily//IPR017441:Protein kinase, ATP binding site
LOC111368824	219.345	1.24587	2.37162	0.224954	5.53833	3.05e-08	1.25e-07	XP_022846059.1	ribosome_biogenesis_protein_BRX1_homolog_1-like	Olive	PF04427:Brix_domain	IPR036047:F-box-like domain superfamily//IPR001810:F-box domain//IPR032675:Leucine-rich repeat domain superfamily
LOC111368834	306.663	2.67208	6.37347	0.195148	13.6926	1.12e-42	2.23e-41	XP_022846070.1	scarecrow-like_protein_28	Olive	PF03514:GRAS_domain_family	IPR018494:Oxysterol-binding protein, conserved site//IPR037239:Oxysterol-binding protein superfamily
LOC111368848	618.626	1.0626	2.0887	0.205906	5.1606	2.46e-07	9.21e-07	XP_022846180.1	pentatricopeptide_repeat-containing_protein_At4g19440,_chloroplastic-like,_transcript_variant_X9	Olive	PF01535:PPR_repeat//PF13041:PPR_repeat_family//PF12854:PPR_repeat
LOC111368849	492.511	1.54985	2.92787	0.171376	9.04358	1.52e-19	1.29e-18	XP_022846092.1	small_RNA_degrading_nuclease_1-like,_transcript_variant_X3	Olive	PF00929:Exonuclease
LOC111368853	257.04	0.45032	1.36634	0.199996	2.25165	0.0243445	0.0438692	XP_022846099.1	cell_wall_integrity_protein_scw1,_transcript_variant_X2	Olive	PF00076:RNA_recognition_motif._(a.k.a._RRM,_RBD,_or_RNP_domain)	IPR000719:Protein kinase domain//IPR008271:Serine/threonine-protein kinase, active site//IPR011009:Protein kinase-like domain superfamily
LOC111368854	318.81	0.632425	1.55017	0.166703	3.79372	0.000148408	0.000394835	XP_022846100.1	ethylene-responsive_transcription_factor_ERF011-like	Olive	PF00847:AP2_domain	IPR023271:Aquaporin-like//IPR022357:Major intrinsic protein, conserved site//IPR000425:Major intrinsic protein
LOC111368875	1670.38	0.532939	1.44687	0.151875	3.50906	0.000449695	0.00111277	XP_022846128.1	probable_solanesyl-diphosphate_synthase_3,_chloroplastic,_transcript_variant_X2	Olive	PF00348:Polyprenyl_synthetase	IPR036967:Ribosomal protein S11 superfamily//IPR001971:Ribosomal protein S11
LOC111368885	179.038	0.699485	1.62393	0.219191	3.19122	0.00141675	0.00324128	XP_022846143.1	tRNA_dimethylallyltransferase_9,_transcript_variant_X2	Olive	PF01715:IPP_transferase	IPR029058:Alpha/Beta hydrolase fold
LOC111368886	67.8465	1.54618	2.92043	0.373234	4.14266	3.43e-05	9.97e-05	XP_022846144.1	transcription_factor_TCP4-like	Olive	PF03634:TCP_family_transcription_factor
LOC111368887	77.3026	2.6187	6.14198	0.428027	6.11807	9.47e-10	4.44e-09	XP_022846148.1	protein_IQ-DOMAIN_1,_transcript_variant_X3	Olive		IPR009038:GOLD domain
LOC111368890	431.259	1.76384	3.39602	0.168639	10.4593	1.33e-25	1.48e-24	XP_022846164.1	WD_repeat-containing_protein_87-like,_transcript_variant_X5	Olive
LOC111368897	72.2658	1.2858	2.43817	0.321978	3.99344	6.51e-05	0.000182432	XP_022846174.1	protein_RICE_SALT_SENSITIVE_3-like	Olive	PF14215:bHLH-MYC_and_R2R3-MYB_transcription_factors_N-terminal
LOC111368898	573.815	0.737976	1.66783	0.134997	5.46663	4.59e-08	1.85e-07	XP_022846177.1	phytosulfokine_receptor_2,_transcript_variant_X4	Olive	PF00069:Protein_kinase_domain//PF13516:Leucine_Rich_repeat//PF13855:Leucine_rich_repeat//PF08263:Leucine_rich_repeat_N-terminal_domain	IPR001356:Homeobox domain//IPR017970:Homeobox, conserved site//IPR009057:Homeobox-like domain superfamily//IPR000047:Helix-turn-helix motif
LOC111368899	1787.45	0.705172	1.63034	0.129319	5.45295	4.95e-08	1.99e-07	XP_022846178.1	early_nodulin-like_protein_2	Olive	PF02298:Plastocyanin-like_domain	IPR036875:Zinc finger, CCHC-type superfamily//IPR001878:Zinc finger, CCHC-type
LOC111368942	179.939	2.63554	6.21406	0.262465	10.0415	1e-23	1.03e-22	XP_022846204.1	protein_QUIRKY-like	Olive	PF00168:C2_domain//PF08372:Plant_phosphoribosyltransferase_C-terminal
LOC111368943	309.635	0.748294	1.67981	0.209475	3.57223	0.000353952	0.000890667	XP_022846203.1	NHP2-like_protein_1_homolog	Olive	PF01248:Ribosomal_protein_L7Ae/L30e/S12e/Gadd45_family
LOC111368946	159.035	1.35646	2.56056	0.23571	5.75478	8.68e-09	3.74e-08	XP_022846205.1	transcription_factor_AS1-like	Olive	PF13921:Myb-like_DNA-binding_domain	IPR035979:RNA-binding domain superfamily//IPR000504:RNA recognition motif domain//IPR012677:Nucleotide-binding alpha-beta plait domain superfamily
LOC111368961	283.082	2.44007	5.42667	0.200474	12.1715	4.41e-34	6.71e-33		interactor_of_constitutive_active_ROPs_2,_chloroplastic-like	Olive		IPR019775:WD40 repeat, conserved site//IPR036322:WD40-repeat-containing domain superfamily//IPR001680:WD40 repeat//IPR000009:Protein phosphatase 2A regulatory subunit PR55//IPR018067:Protein phosphatase 2A regulatory subunit PR55, conserved site
LOC111368967	98.4315	1.76993	3.41038	0.303624	5.82935	5.56e-09	2.45e-08	XP_022846238.1	pentatricopeptide_repeat-containing_protein_At3g14730,_transcript_variant_X3	Olive	PF13041:PPR_repeat_family//PF01535:PPR_repeat//PF12854:PPR_repeat	IPR003593:AAA+ ATPase domain//IPR037219:Peptidase M41-like//IPR027417:P-loop containing nucleoside triphosphate hydrolase
LOC111368968	64.737	1.52152	2.87093	0.346287	4.39382	1.11e-05	3.44e-05	XP_022846226.1	probable_linoleate_9S-lipoxygenase_5	Olive	PF00305:Lipoxygenase//PF01477:PLAT/LH2_domain	IPR012340:Nucleic acid-binding, OB-fold
LOC111368982	124.52	2.55025	5.85738	0.328145	7.77174	7.74e-15	5.13e-14	XP_022846250.1	amino_acid_transporter_AVT1A-like,_transcript_variant_X2	Olive	PF01490:Transmembrane_amino_acid_transporter_protein
LOC111369009	401.748	1.55998	2.94849	0.157073	9.93157	3.03e-23	3.06e-22	XP_022846268.1	pentatricopeptide_repeat-containing_protein_At1g80270,_mitochondrial-like	Olive	PF13812:Pentatricopeptide_repeat_domain//PF01535:PPR_repeat	IPR000719:Protein kinase domain//IPR011009:Protein kinase-like domain superfamily//IPR017441:Protein kinase, ATP binding site//IPR018451:NAF/FISL domain//IPR008271:Serine/threonine-protein kinase, active site
LOC111369017	395.799	0.773404	1.7093	0.167638	4.61353	3.96e-06	1.29e-05	XP_022846274.1	putative_late_blight_resistance_protein_homolog_R1B-8	Olive	PF00931:NB-ARC_domain	IPR018079:Ribosomal protein S4, conserved site//IPR001912:Ribosomal protein S4/S9, N-terminal//IPR005710:Ribosomal protein S4/S9, eukaryotic/archaeal//IPR036986:RNA-binding S4 domain superfamily//IPR002942:RNA-binding S4 domain
LOC111369062	258.457	1.06287	2.08909	0.184119	5.77276	7.8e-09	3.38e-08	XP_022846316.1	protein_translocase_subunit_SecA,_chloroplastic-like	Olive	PF07516:SecA_Wing_and_Scaffold_domain	IPR036291:NAD(P)-binding domain superfamily
LOC111369066	109.57	1.29565	2.45488	0.340168	3.80886	0.000139612	0.000372671	XP_022846321.1	uncharacterized_LOC111369066	Olive	PF07795:Protein_of_unknown_function_(DUF1635)	IPR016024:Armadillo-type fold
LOC111369068	341.527	0.777301	1.71392	0.201029	3.86662	0.000110356	0.000299036	XP_022846324.1	histidine--tRNA_ligase,_chloroplastic/mitochondrial	Olive	PF03129:Anticodon_binding_domain//PF13393:Histidyl-tRNA_synthetase	IPR011284:3-oxoacyl-(acyl-carrier-protein) reductase//IPR002347:Short-chain dehydrogenase/reductase SDR//IPR036291:NAD(P)-binding domain superfamily//IPR020904:Short-chain dehydrogenase/reductase, conserved site
LOC111369072	1534.46	0.663972	1.58444	0.185694	3.57562	0.000349401	0.000880005	XP_022846325.1	outer_envelope_pore_protein_16,_chloroplastic	Olive		IPR006553:Leucine-rich repeat, cysteine-containing subtype//IPR032675:Leucine-rich repeat domain superfamily//IPR036047:F-box-like domain superfamily//IPR001810:F-box domain
LOC111369077	264.486	1.11426	2.16483	0.179325	6.21361	5.18e-10	2.47e-09	XP_022846336.1	CDPK-related_kinase_1-like,_transcript_variant_X2	Olive	PF00069:Protein_kinase_domain	IPR000301:Tetraspanin
LOC111369089	225.612	1.22658	2.34011	0.216256	5.67188	1.41e-08	5.99e-08	XP_022846341.1	probable_LRR_receptor-like_serine/threonine-protein_kinase_At1g06840	Olive	PF00069:Protein_kinase_domain
LOC111369104	309.187	0.795904	1.73617	0.237647	3.3491	0.000810742	0.00193239	XP_022846358.1	stomatal_closure-related_actin-binding_protein_2-like,_transcript_variant_X2	Olive	PF16711:Actin-binding_domain_of_plant-specific_actin-binding_protein//PF16712:Coiled-coil_regions_of_plant-specific_actin-binding_protein//PF16709:Ig_domain_of_plant-specific_actin-binding_protein//PF17684:PH_domain_of_plant-specific_actin-binding_protein	IPR036093:NAC domain superfamily//IPR003441:NAC domain
LOC111369111	129.716	1.87741	3.67414	0.274965	6.82781	8.62e-12	4.7e-11	XP_022846362.1	uncharacterized_LOC111369111	Olive	PF05270:Alpha-L-arabinofuranosidase_B_(ABFB)_domain//PF07944:Beta-L-arabinofuranosidase,_GH127	IPR017884:SANT domain//IPR001005:SANT/Myb domain//IPR001623:DnaJ domain//IPR036869:Chaperone J-domain superfamily//IPR018253:DnaJ domain, conserved site//IPR009057:Homeobox-like domain superfamily
LOC111369172	1080.01	0.508733	1.4228	0.134828	3.77321	0.00016116	0.000426737	XP_022846416.1	signal_peptide_peptidase-like_3	Olive	PF04258:Signal_peptide_peptidase//PF02225:PA_domain	IPR029044:Nucleotide-diphospho-sugar transferases
LOC111369173	237.624	0.668362	1.58927	0.284458	2.3496	0.0187935	0.0347717		histone-lysine_N-methyltransferase_ATX1-like	Olive
LOC111369178	2589.16	0.618522	1.5353	0.108358	5.70812	1.14e-08	4.88e-08	XP_022846424.1	transcription_elongation_factor_SPT6_homolog	Olive	PF14639:Holliday-junction_resolvase-like_of_SPT6//PF14632:Acidic_N-terminal_SPT6//PF14641:Helix-turn-helix_DNA-binding_domain_of_SPT6//PF17674:HHH_domain//PF14633:SH2_domain//PF14635:Helix-hairpin-helix_motif	IPR017441:Protein kinase, ATP binding site//IPR000719:Protein kinase domain//IPR013320:Concanavalin A-like lectin/glucanase domain superfamily//IPR011009:Protein kinase-like domain superfamily//IPR001220:Legume lectin domain//IPR008271:Serine/threonine-protein kinase, active site
LOC111369257	218.505	1.72589	3.30783	0.307838	5.60647	2.06e-08	8.61e-08	XP_022846479.1	50S_ribosomal_protein_5_alpha,_chloroplastic-like	Olive
LOC111369262	972.545	0.437633	1.35438	0.178525	2.45138	0.0142309	0.0270792	XP_022846480.1	proteasome_subunit_beta_type-5-A-like	Olive	PF00227:Proteasome_subunit	IPR026283:Beta-galactosidase 1-like//IPR017853:Glycoside hydrolase superfamily//IPR008979:Galactose-binding-like domain superfamily//IPR019801:Glycoside hydrolase, family 35, conserved site//IPR001944:Glycoside hydrolase, family 35
LOC111369267	87.3959	0.900235	1.86637	0.285444	3.15381	0.00161153	0.00365088	XP_022846508.1	E3_ubiquitin_protein_ligase_RIE1-like,_transcript_variant_X6	Olive	PF13639:Ring_finger_domain	IPR036514:SGNH hydrolase superfamily//IPR035669:GDSL lipase/esterase-like, plant
LOC111369288	891.329	0.789474	1.72844	0.154956	5.09483	3.49e-07	1.29e-06	XP_022846507.1	histidine_kinase_3-like	Olive	PF03924:CHASE_domain	IPR000608:Ubiquitin-conjugating enzyme E2//IPR023313:Ubiquitin-conjugating enzyme, active site//IPR016135:Ubiquitin-conjugating enzyme/RWD-like
LOC111369290	499.085	1.27823	2.42542	0.169255	7.55212	4.28e-14	2.71e-13	XP_022846516.1	calmodulin-binding_transcription_activator_4-like,_transcript_variant_X8	Olive	PF00612:IQ_calmodulin-binding_motif//PF12796:Ankyrin_repeats_(3_copies)//PF01833:IPT/TIG_domain//PF03859:CG-1_domain	IPR020864:Membrane attack complex component/perforin (MACPF) domain
LOC111369292	588.485	1.83876	3.57703	0.165454	11.1135	1.08e-28	1.37e-27	XP_022846528.1	histone-lysine_N-methyltransferase,_H3_lysine-9_specific_SUVH1-like,_transcript_variant_X2	Olive	PF00856:SET_domain//PF02182:SAD/SRA_domain//PF05033:Pre-SET_motif	IPR011009:Protein kinase-like domain superfamily//IPR017441:Protein kinase, ATP binding site//IPR002048:EF-hand domain//IPR000719:Protein kinase domain//IPR018247:EF-Hand 1, calcium-binding site//IPR008271:Serine/threonine-protein kinase, active site//IPR011992:EF-hand domain pair
LOC111369294	290.7	0.445462	1.36175	0.173326	2.57009	0.0101673	0.0199484		uncharacterized_LOC111369294	Olive
LOC111369298	289.148	0.513087	1.4271	0.223722	2.29341	0.0218242	0.0398248	XP_022846526.1	probable_pre-mRNA-splicing_factor_ATP-dependent_RNA_helicase_DEAH4,_transcript_variant_X3	Olive	PF04408:Helicase_associated_domain_(HA2)//PF00271:Helicase_conserved_C-terminal_domain//PF07717:Oligonucleotide/oligosaccharide-binding_(OB)-fold
LOC111369302	873.841	0.266814	1.20315	0.119594	2.23099	0.0256816	0.0459879			Olive		IPR036640:ABC transporter type 1, transmembrane domain superfamily//IPR011527:ABC transporter type 1, transmembrane domain//IPR027417:P-loop containing nucleoside triphosphate hydrolase//IPR003439:ABC transporter-like//IPR017871:ABC transporter, conserved site//IPR003593:AAA+ ATPase domain
LOC111369304	306.05	1.57016	2.96938	0.179341	8.75516	2.04e-18	1.64e-17	XP_022846533.1	trihelix_transcription_factor_GT-4-like,_transcript_variant_X2	Olive	PF13837:Myb/SANT-like_DNA-binding_domain
LOC111369306	1819.63	1.30015	2.46254	0.137445	9.45937	3.1e-21	2.85e-20	XP_022846538.1	magnesium-protoporphyrin_IX_monomethyl_ester_[oxidative]_cyclase,_chloroplastic	Olive	PF02915:Rubrerythrin
LOC111369308	1297.81	1.34695	2.54375	0.179	7.52487	5.28e-14	3.31e-13	XP_022846536.1	T-complex_protein_1_subunit_epsilon	Olive	PF00118:TCP-1/cpn60_chaperonin_family	IPR003657:WRKY domain//IPR036576:WRKY domain superfamily
LOC111369310	971.453	1.95368	3.87362	0.169688	11.5133	1.13e-30	1.53e-29	XP_022846560.1	proteasome_subunit_alpha_type-3,_transcript_variant_X2	Olive	PF00227:Proteasome_subunit//PF10584:Proteasome_subunit_A_N-terminal_signature	IPR001807:Chloride channel, voltage gated//IPR002251:Chloride channel ClC-plant//IPR000644:CBS domain//IPR014743:Chloride channel, core
LOC111369313	97.7891	1.17444	2.25705	0.280404	4.18837	2.81e-05	8.25e-05	XP_022846555.1	probable_protein_phosphatase_2C_14	Olive	PF00481:Protein_phosphatase_2C
LOC111369321	649.592	0.614488	1.53101	0.137533	4.46792	7.9e-06	2.49e-05	XP_022846569.1	uncharacterized_LOC111369321,_transcript_variant_X3	Olive
LOC111369333	381.6	0.804159	1.74613	0.232963	3.45187	0.000556716	0.0013585		uncharacterized_LOC111369333	Olive
LOC111369334	76.3359	1.22267	2.33379	0.320499	3.8149	0.000136239	0.000364189	XP_022846579.1	leucoanthocyanidin_reductase-like	Olive	PF05368:NmrA-like_family	IPR036885:SWIB/MDM2 domain superfamily//IPR019835:SWIB domain
LOC111369336	362.858	1.88996	3.70626	0.182373	10.3631	3.65e-25	3.98e-24	XP_022846581.1	zinc_finger_protein_GIS3-like	Olive
LOC111369340	81.5486	1.07204	2.10241	0.463581	2.31253	0.0207487	0.0380375		uncharacterized_LOC111369340	Olive
LOC111369352	1402.89	0.875087	1.83412	0.131975	6.63071	3.34e-11	1.75e-10	XP_022846604.1	HMG-Y-related_protein_B-like	Olive	PF00538:linker_histone_H1_and_H5_family//PF02178:AT_hook_motif
LOC111369353	270.63	0.750713	1.68262	0.231	3.24983	0.00115473	0.00268176	XP_022846606.1	microtubule-associated_protein_70-4-like,_transcript_variant_X2	Olive	PF07058:Microtubule-associated_protein_70	IPR027417:P-loop containing nucleoside triphosphate hydrolase//IPR003439:ABC transporter-like//IPR003593:AAA+ ATPase domain
LOC111369354	843.767	0.893804	1.85807	0.13909	6.42606	1.31e-10	6.55e-10	XP_022846607.1	alpha,alpha-trehalose-phosphate_synthase_[UDP-forming]_6-like	Olive	PF02358:Trehalose-phosphatase//PF00982:Glycosyltransferase_family_20	IPR027417:P-loop containing nucleoside triphosphate hydrolase//IPR006689:Small GTPase superfamily, ARF/SAR type//IPR005225:Small GTP-binding protein domain
LOC111369366	479.457	0.540288	1.45426	0.140687	3.84036	0.000122853	0.00033048	XP_022846619.1	uncharacterized_LOC111369366,_transcript_variant_X2	Olive		IPR020843:Polyketide synthase, enoylreductase domain//IPR011032:GroES-like superfamily//IPR036291:NAD(P)-binding domain superfamily
LOC111369367	567.793	1.34151	2.53417	0.217147	6.1779	6.5e-10	3.08e-09	XP_022846620.1	universal_stress_protein_PHOS32-like	Olive	PF00582:Universal_stress_protein_family
LOC111369368	203.015	2.94118	7.68039	0.285734	10.2934	7.54e-25	8.14e-24	XP_022846622.1	rop_guanine_nucleotide_exchange_factor_7-like,_transcript_variant_X2	Olive	PF03759:PRONE_(Plant-specific_Rop_nucleotide_exchanger)	IPR036787:Translation initiation factor 3 (IF-3), N-terminal domain superfamily
LOC111369378	100.616	0.959693	1.9449	0.276762	3.46757	0.00052518	0.00128697	XP_022846638.1	thymidylate_kinase,_transcript_variant_X3	Olive	PF02223:Thymidylate_kinase
LOC111369388	157.212	3.08713	8.49804	0.326782	9.44706	3.48e-21	3.19e-20	XP_022846650.1	kinesin-like_protein_KIN-5B	Olive	PF00225:Kinesin_motor_domain
LOC111369389	159.247	1.93196	3.81572	0.2881	6.70585	2e-11	1.06e-10	XP_022846651.1	DEAD-box_ATP-dependent_RNA_helicase_57	Olive	PF00271:Helicase_conserved_C-terminal_domain//PF00270:DEAD/DEAH_box_helicase	IPR000679:Zinc finger, GATA-type//IPR013088:Zinc finger, NHR/GATA-type
LOC111369396	71.8861	1.98046	3.9462	0.389632	5.08291	3.72e-07	1.37e-06	XP_022846666.1	fasciclin-like_arabinogalactan_protein_11	Olive	PF02469:Fasciclin_domain	IPR003591:Leucine-rich repeat, typical subtype//IPR001611:Leucine-rich repeat//IPR000719:Protein kinase domain//IPR032675:Leucine-rich repeat domain superfamily//IPR011009:Protein kinase-like domain superfamily
LOC111369397	449.748	0.757993	1.69114	0.159007	4.76706	1.87e-06	6.38e-06			Olive		IPR027521:U6 snRNA phosphodiesterase Usb1
LOC111369403	355.858	1.1538	2.22499	0.170685	6.75982	1.38e-11	7.41e-11	XP_022846671.1	auxin_response_factor_18-like,_transcript_variant_X2	Olive	PF06507:Auxin_response_factor//PF02362:B3_DNA_binding_domain
LOC111369410	107.862	1.45816	2.74759	0.27172	5.36642	8.03e-08	3.15e-07	XP_022846682.1	serine-rich_adhesin_for_platelets-like,_transcript_variant_X3	Olive		IPR000308:14-3-3 protein//IPR023410:14-3-3 domain//IPR036815:14-3-3 domain superfamily//IPR023409:14-3-3 protein, conserved site
LOC111369418	292.298	0.43281	1.34986	0.196152	2.2065	0.0273491	0.0486448	XP_022846701.1	protein_PTST_homolog_3,_chloroplastic,_transcript_variant_X6	Olive		IPR027417:P-loop containing nucleoside triphosphate hydrolase//IPR032675:Leucine-rich repeat domain superfamily
LOC111369420	270.923	0.726559	1.65469	0.184291	3.94246	8.07e-05	0.00022324	XP_022846876.1	uncharacterized_LOC111369420,_transcript_variant_X3	Olive	PF00534:Glycosyl_transferases_group_1//PF16994:Glycosyl-transferase_family_4	IPR008927:6-phosphogluconate dehydrogenase-like, C-terminal domain superfamily//IPR006168:Glycerol-3-phosphate dehydrogenase, NAD-dependent//IPR013328:6-phosphogluconate dehydrogenase, domain 2//IPR036291:NAD(P)-binding domain superfamily
LOC111369434	558.133	0.622031	1.53904	0.155328	4.00463	6.21e-05	0.000174486	XP_022846718.1	ankyrin_repeat_domain-containing_protein_30A-like,_transcript_variant_X2	Olive	PF04949:Transcriptional_activator
LOC111369440	1426.28	0.511244	1.42528	0.116586	4.38514	1.16e-05	3.57e-05	XP_022846726.1	transcriptional_activator_DEMETER-like,_transcript_variant_X4	Olive	PF15629:Permuted_single_zf-CXXC_unit//PF15628:RRM_in_Demeter	IPR018230:BUD31/G10-related, conserved site//IPR001748:G10 protein
LOC111369441	325.236	0.504376	1.41851	0.165713	3.04368	0.00233707	0.00515567	XP_022846731.1	uncharacterized_LOC111369441	Olive	PF00097:Zinc_finger,_C3HC4_type_(RING_finger)	IPR012763:DNA polymerase III, subunit gamma/ tau//IPR003593:AAA+ ATPase domain//IPR027417:P-loop containing nucleoside triphosphate hydrolase
LOC111369447	1638.98	1.2809	2.42991	0.173879	7.36664	1.75e-13	1.06e-12	XP_022846732.1	histone_deacetylase_HDT1-like	Olive	PF12874:Zinc-finger_of_C2H2_type//PF17800:Nucleoplasmin-like_domain	IPR001401:Dynamin, GTPase domain//IPR022812:Dynamin superfamily//IPR030381:Dynamin-type guanine nucleotide-binding (G) domain//IPR020850:GTPase effector domain//IPR027417:P-loop containing nucleoside triphosphate hydrolase//IPR003130:Dynamin GTPase effector
LOC111369449	231.09	1.81679	3.52296	0.213196	8.52168	1.57e-17	1.21e-16	XP_022846735.1	uncharacterized_LOC111369449,_transcript_variant_X2	Olive	PF03031:NLI_interacting_factor-like_phosphatase	IPR029000:Cyclophilin-like domain superfamily//IPR024936:Cyclophilin-type peptidyl-prolyl cis-trans isomerase//IPR020892:Cyclophilin-type peptidyl-prolyl cis-trans isomerase, conserved site//IPR002130:Cyclophilin-type peptidyl-prolyl cis-trans isomerase domain
LOC111369451	116.013	1.81062	3.50793	0.273333	6.62423	3.49e-11	1.82e-10	XP_022846741.1	homeobox-leucine_zipper_protein_HAT14-like	Olive	PF02183:Homeobox_associated_leucine_zipper//PF00046:Homeodomain	IPR036390:Winged helix DNA-binding domain superfamily//IPR016689:ESCRT-2 complex, Snf8//IPR036388:Winged helix-like DNA-binding domain superfamily
LOC111369452	137.377	0.852445	1.80556	0.276852	3.07906	0.00207652	0.00462059	XP_022846738.1	AT-hook_motif_nuclear-localized_protein_7-like	Olive	PF03479:Plants_and_Prokaryotes_Conserved_(PCC)_domain//PF02178:AT_hook_motif
LOC111369455	50.6853	3.76409	13.5864	0.553128	6.8051	1.01e-11	5.47e-11	XP_022846742.1	leucine-rich_repeat_receptor-like_protein_kinase_PXC1	Olive	PF00069:Protein_kinase_domain//PF08263:Leucine_rich_repeat_N-terminal_domain	IPR006620:Prolyl 4-hydroxylase, alpha subunit//IPR003582:ShKT domain//IPR005123:Oxoglutarate/iron-dependent dioxygenase
LOC111369456	765.112	3.49141	11.2465	0.163376	21.3704	2.52e-101	1.54e-99	XP_022846743.1	DNA_replication_licensing_factor_MCM7	Olive	PF17855:MCM_AAA-lid_domain//PF14551:MCM_N-terminal_domain//PF00493:MCM_P-loop_domain//PF17207:MCM_OB_domain
LOC111369468	652.707	0.456696	1.3724	0.14002	3.26165	0.00110767	0.00257924	XP_022846754.1	sugar_transport_protein_13-like	Olive	PF00083:Sugar_(and_other)_transporter	IPR011009:Protein kinase-like domain superfamily
LOC111369472	1203.97	0.436679	1.35348	0.123362	3.5398	0.000400423	0.000999601	XP_022846760.1	carbon_catabolite_repressor_protein_4_homolog_1-like	Olive	PF03372:Endonuclease/Exonuclease/phosphatase_family//PF15801:zf-MYND-like_zinc_finger,_mRNA-binding	IPR001313:Pumilio RNA-binding repeat//IPR033133:Pumilio homology domain//IPR011989:Armadillo-like helical//IPR016024:Armadillo-type fold
LOC111369482	1776.63	1.93145	3.81438	0.126667	15.2482	1.69e-52	4.35e-51	XP_022846772.1	COP1-interacting_protein_7,_transcript_variant_X5	Olive		IPR001752:Kinesin motor domain//IPR019821:Kinesin motor domain, conserved site//IPR036961:Kinesin motor domain superfamily//IPR027417:P-loop containing nucleoside triphosphate hydrolase
LOC111369484	116.712	0.991729	1.98857	0.25184	3.93793	8.22e-05	0.000227055	XP_022846777.1	1-aminocyclopropane-1-carboxylate_oxidase_homolog_1-like	Olive	PF14226:non-haem_dioxygenase_in_morphine_synthesis_N-terminal//PF03171:2OG-Fe(II)_oxygenase_superfamily	IPR036291:NAD(P)-binding domain superfamily//IPR020843:Polyketide synthase, enoylreductase domain//IPR011032:GroES-like superfamily
LOC111369485	1115.71	2.27943	4.85485	0.147515	15.4522	7.29e-54	1.94e-52	XP_022846778.1	heavy_metal-associated_isoprenylated_plant_protein_32-like	Olive	PF00403:Heavy-metal-associated_domain	IPR036756:H/ACA ribonucleoprotein complex, subunit Nop10 superfamily
LOC111369487	3297.6	0.336613	1.26279	0.121677	2.76645	0.00566695	0.0116802	XP_022846782.1	60S_ribosomal_protein_L21-2-like,_transcript_variant_X2	Olive	PF01157:Ribosomal_protein_L21e
LOC111369511	136.616	0.954851	1.93838	0.252529	3.78115	0.000156107	0.000414205	XP_022846825.1	uncharacterized_LOC111369511	Olive		IPR036638:Helix-loop-helix DNA-binding domain superfamily//IPR011598:Myc-type, basic helix-loop-helix (bHLH) domain
LOC111369513	201.974	1.42895	2.6925	0.212773	6.71583	1.87e-11	9.94e-11		uncharacterized_LOC111369513	Olive
LOC111369518	482.589	0.982391	1.97574	0.166256	5.9089	3.44e-09	1.54e-08	XP_022846832.1	kinesin_light_chain_3,_transcript_variant_X2	Olive	PF13374:Tetratricopeptide_repeat//PF13424:Tetratricopeptide_repeat	IPR016163:Aldehyde dehydrogenase, C-terminal//IPR016162:Aldehyde dehydrogenase, N-terminal//IPR029510:Aldehyde dehydrogenase, glutamic acid active site//IPR016161:Aldehyde/histidinol dehydrogenase//IPR016160:Aldehyde dehydrogenase, cysteine active site
LOC111369527	209.455	0.437912	1.35464	0.193587	2.26209	0.0236918	0.0427892	XP_022846851.1	uncharacterized_LOC111369527	Olive	PF01764:Lipase_(class_3)//PF03893:Lipase_3_N-terminal_region
LOC111369533	522.149	0.866416	1.82313	0.161172	5.37572	7.63e-08	3e-07	XP_022846861.1	probable_1-deoxy-D-xylulose-5-phosphate_synthase_2,_chloroplastic,_transcript_variant_X2	Olive	PF13292:1-deoxy-D-xylulose-5-phosphate_synthase//PF02780:Transketolase,_C-terminal_domain//PF02779:Transketolase,_pyrimidine_binding_domain	IPR006501:Pectinesterase inhibitor domain//IPR034086:Pectinesterase inhibitor, plant//IPR035513:Invertase/pectin methylesterase inhibitor domain superfamily
LOC111369534	298.639	1.27078	2.41292	0.26157	4.85827	1.18e-06	4.12e-06	XP_022846864.1	RNA-binding_KH_domain-containing_protein_RCF3-like,_transcript_variant_X3	Olive	PF00013:KH_domain	IPR043519:Nucleotidyltransferase superfamily
LOC111369535	1276.77	1.12642	2.18316	0.131093	8.59255	8.51e-18	6.64e-17	XP_022846866.1	putative_late_blight_resistance_protein_homolog_R1A-10,_transcript_variant_X2	Olive	PF00931:NB-ARC_domain
LOC111369537	52.9649	1.12178	2.17615	0.408592	2.74548	0.00604228	0.0123968	XP_022846868.1	uncharacterized_LOC111369537	Olive		IPR016158:Cullin homology domain//IPR036317:Cullin homology domain superfamily//IPR036388:Winged helix-like DNA-binding domain superfamily//IPR036390:Winged helix DNA-binding domain superfamily//IPR016159:Cullin repeat-like-containing domain superfamily//IPR019559:Cullin protein, neddylation domain
LOC111369538	2397.44	1.13509	2.19633	0.116489	9.74424	1.95e-22	1.91e-21	XP_022846870.1	putative_late_blight_resistance_protein_homolog_R1A-10,_transcript_variant_X2	Olive	PF00931:NB-ARC_domain	IPR000504:RNA recognition motif domain//IPR032710:NTF2-like domain superfamily//IPR012677:Nucleotide-binding alpha-beta plait domain superfamily//IPR035979:RNA-binding domain superfamily//IPR018222:Nuclear transport factor 2, eukaryote
LOC111369539	255.04	1.42913	2.69285	0.194021	7.36587	1.76e-13	1.07e-12	XP_022846872.1	putative_late_blight_resistance_protein_homolog_R1A-3,_transcript_variant_X2	Olive	PF00931:NB-ARC_domain	IPR038508:ArfGAP domain superfamily
LOC111369541	715.512	0.710826	1.63674	0.17688	4.01868	5.85e-05	0.00016483	XP_022846874.1	putative_late_blight_resistance_protein_homolog_R1A-3,_transcript_variant_X9	Olive	PF00931:NB-ARC_domain	IPR036312:Bifunctional inhibitor/plant lipid transfer protein/seed storage helical domain superfamily//IPR016140:Bifunctional inhibitor/plant lipid transfer protein/seed storage helical domain
LOC111369546	225.867	0.776691	1.7132	0.188694	4.11613	3.85e-05	0.000111204	XP_022846881.1	uncharacterized_LOC111369546,_transcript_variant_X3	Olive		IPR001289:Nuclear transcription factor Y subunit A
LOC111369548	2450.93	0.618678	1.53547	0.13645	4.53412	5.78e-06	1.85e-05	XP_022846886.1	homeobox-leucine_zipper_protein_ATHB-6-like	Olive	PF02183:Homeobox_associated_leucine_zipper//PF00046:Homeodomain	IPR001005:SANT/Myb domain//IPR009057:Homeobox-like domain superfamily
LOC111369549	74.537	0.949718	1.93149	0.319784	2.96987	0.00297922	0.00644833	XP_022846887.1	E3_ubiquitin-protein_ligase_RING1-like	Olive	PF13639:Ring_finger_domain
LOC111369550	616.623	0.46462	1.37995	0.15901	2.92196	0.00347836	0.0074401	XP_022846891.1	uncharacterized_LOC111369550	Olive		IPR038765:Papain-like cysteine peptidase superfamily//IPR003653:Ulp1 protease family, C-terminal catalytic domain
LOC111369551	437.722	1.62565	3.08582	0.237875	6.83405	8.26e-12	4.5e-11	XP_022846888.1	protein_DETOXIFICATION_27-like	Olive	PF01554:MatE
LOC111369560	91.6783	1.5285	2.88486	0.298135	5.12689	2.95e-07	1.09e-06	XP_022846897.1	putative_late_blight_resistance_protein_homolog_R1C-3,_transcript_variant_X2	Olive	PF00931:NB-ARC_domain	IPR036865:CRAL-TRIO lipid binding domain superfamily//IPR036598:GOLD domain superfamily//IPR001251:CRAL-TRIO lipid binding domain//IPR036273:CRAL/TRIO, N-terminal domain superfamily//IPR009038:GOLD domain//IPR011074:CRAL/TRIO, N-terminal domain
LOC111369566	1297.08	0.740194	1.6704	0.14342	5.16103	2.46e-07	9.2e-07	XP_022846904.1	40S_ribosomal_protein_S6-like	Olive	PF01092:Ribosomal_protein_S6e
LOC111369569	849.096	1.69382	3.23513	0.151347	11.1916	4.48e-29	5.74e-28	XP_022846907.1	F-box_protein_FBW2-like	Olive
LOC111369570	139.017	0.771804	1.7074	0.257461	2.99775	0.00271979	0.00592863	XP_022846911.1	protein_HOTHEAD-like	Olive	PF05199:GMC_oxidoreductase//PF00732:GMC_oxidoreductase	IPR000953:Chromo/chromo shadow domain//IPR017984:Chromo domain subgroup//IPR016197:Chromo-like domain superfamily//IPR023779:Chromo domain, conserved site
LOC111369571	381.014	0.922266	1.89509	0.166572	5.53673	3.08e-08	1.26e-07	XP_022846910.1	uncharacterized_LOC111369571,_transcript_variant_X3	Olive		IPR017946:PLC-like phosphodiesterase, TIM beta/alpha-barrel domain superfamily
LOC111369572	560.428	0.530951	1.44488	0.135694	3.91287	9.12e-05	0.000250315		uncharacterized_LOC111369572	Olive
LOC111369577	56.879	1.85894	3.62741	0.405124	4.58857	4.46e-06	1.45e-05	XP_022846931.1	protein_IQ-DOMAIN_1-like,_transcript_variant_X2	Olive	PF00612:IQ_calmodulin-binding_motif
LOC111369578	329.819	0.962101	1.94814	0.170292	5.64971	1.61e-08	6.77e-08	XP_022846920.1	histone-lysine_N-methyltransferase_family_member_SUVH9-like	Olive	PF05033:Pre-SET_motif//PF00856:SET_domain//PF02182:SAD/SRA_domain
LOC111369579	138.522	1.50262	2.83357	0.289182	5.19611	2.03e-07	7.67e-07		uncharacterized_LOC111369579	Olive		IPR001611:Leucine-rich repeat//IPR003591:Leucine-rich repeat, typical subtype//IPR032675:Leucine-rich repeat domain superfamily
LOC111369586	533.452	1.3376	2.52731	0.19462	6.87289	6.29e-12	3.46e-11	XP_022846936.1	small_subunit_processome_component_20_homolog,_transcript_variant_X2	Olive	PF07539:Down-regulated_in_metastasis
LOC111369597	243.071	0.643236	1.56183	0.188852	3.40603	0.000659158	0.00159151	XP_022846948.1	guanine_nucleotide-binding_protein_subunit_gamma_2-like	Olive	PF00631:GGL_domain
LOC111369605	88.7216	3.13552	8.78793	0.412799	7.59576	3.06e-14	1.95e-13	XP_022846955.1	protein_tesmin/TSO1-like_CXC_2	Olive	PF03638:Tesmin/TSO1-like_CXC_domain,_cysteine-rich_domain	IPR001356:Homeobox domain//IPR009057:Homeobox-like domain superfamily//IPR023393:START-like domain superfamily//IPR002913:START domain
LOC111369616	197.829	2.60145	6.06896	0.250496	10.3852	2.9e-25	3.18e-24	XP_022846967.1	interactor_of_constitutive_active_ROPs_3-like,_transcript_variant_X2	Olive
LOC111369628	286.299	0.746205	1.67737	0.175739	4.2461	2.18e-05	6.47e-05	XP_022846983.1	putative_pentatricopeptide_repeat-containing_protein_At5g59900,_transcript_variant_X2	Olive	PF13041:PPR_repeat_family//PF01535:PPR_repeat//PF12854:PPR_repeat	IPR006553:Leucine-rich repeat, cysteine-containing subtype//IPR032675:Leucine-rich repeat domain superfamily
LOC111369629	916.035	0.319233	1.24767	0.11678	2.73362	0.00626414	0.0128121	XP_022846987.1	actin-depolymerizing_factor_2-like,_transcript_variant_X3	Olive	PF00241:Cofilin/tropomyosin-type_actin-binding_protein
LOC111369632	2605.75	0.624807	1.542	0.20435	3.05753	0.0022317	0.00494038	XP_022846989.1	histone_H2A-like	Olive	PF16211:C-terminus_of_histone_H2A//PF00125:Core_histone_H2A/H2B/H3/H4	IPR003141:Polymerase/histidinol phosphatase, N-terminal//IPR016195:Polymerase/histidinol phosphatase-like
LOC111369640	343.677	0.771625	1.70719	0.200736	3.84397	0.000121057	0.000325963	XP_022847002.1	kinesin-like_protein_KIN-5D,_transcript_variant_X2	Olive	PF00225:Kinesin_motor_domain	IPR016177:DNA-binding domain superfamily//IPR001471:AP2/ERF domain//IPR036955:AP2/ERF domain superfamily
LOC111369644	1822.15	2.87491	7.33556	0.14816	19.404	7.13e-84	3.39e-82	XP_022847007.1	histone_H4	Olive	PF15511:Centromere_kinetochore_component_CENP-T_histone_fold	IPR002464:DNA/RNA helicase, ATP-dependent, DEAH-box type, conserved site//IPR027417:P-loop containing nucleoside triphosphate hydrolase//IPR006554:Helicase-like, DEXD box c2 type//IPR014013:Helicase superfamily 1/2, ATP-binding domain, DinG/Rad3-type//IPR006555:ATP-dependent helicase, C-terminal//IPR014001:Helicase superfamily 1/2, ATP-binding domain//IPR013020:ATP-dependent helicase Rad3/Chl1-li…
LOC111369645	1150.62	0.89723	1.86249	0.122747	7.3096	2.68e-13	1.61e-12	XP_022847009.1	calcium-transporting_ATPase_4,_endoplasmic_reticulum-type-like,_transcript_variant_X2	Olive	PF00702:haloacid_dehalogenase-like_hydrolase//PF00689:Cation_transporting_ATPase,_C-terminus//PF00690:Cation_transporter/ATPase,_N-terminus//PF00122:E1-E2_ATPase	IPR043519:Nucleotidyltransferase superfamily//IPR011068:Nucleotidyltransferase, class I-like, C-terminal
LOC111369647	1477.84	0.85715	1.81146	0.124253	6.89844	5.26e-12	2.91e-11			Olive		IPR000719:Protein kinase domain//IPR008271:Serine/threonine-protein kinase, active site//IPR011009:Protein kinase-like domain superfamily
LOC111369649	1056.39	0.373544	1.29553	0.122833	3.04107	0.00235736	0.00519701	XP_022847015.1	uncharacterized_LOC111369649	Olive	PF06870:A49-like_RNA_polymerase_I_associated_factor
LOC111369654	112.721	0.603922	1.51984	0.26231	2.30232	0.0213173	0.0389938			Olive		IPR023393:START-like domain superfamily
LOC111369655	176.511	1.25746	2.39075	0.213425	5.89182	3.82e-09	1.7e-08	XP_022847021.1	probable_serine/threonine-protein_kinase_PBL9,_transcript_variant_X4	Olive	PF07714:Protein_tyrosine_kinase	IPR007306:tRNA A64-2'-O-ribosylphosphate transferase
LOC111369656	216.899	2.49402	5.63344	0.230434	10.8231	2.68e-27	3.19e-26	XP_022847023.1	probable_serine/threonine-protein_kinase_PBL19,_transcript_variant_X2	Olive	PF07714:Protein_tyrosine_kinase	IPR023393:START-like domain superfamily
LOC111369657	152.589	0.592447	1.5078	0.231706	2.55689	0.0105611	0.0206356		uncharacterized_LOC111369657	Olive
LOC111369659	1184.29	0.432199	1.34929	0.126657	3.41236	0.000644036	0.00155791	XP_022847026.1	factor_of_DNA_methylation_4-like	Olive	PF03468:XS_domain//PF03470:XS_zinc_finger_domain	IPR003657:WRKY domain//IPR036576:WRKY domain superfamily
LOC111369666	650.54	1.02284	2.03192	0.213291	4.79552	1.62e-06	5.57e-06	XP_022847035.1	D-xylose-proton_symporter-like_3,_chloroplastic	Olive	PF00083:Sugar_(and_other)_transporter	IPR017853:Glycoside hydrolase superfamily//IPR001579:Glycosyl hydrolases family 18 (GH18) active site
LOC111369667	1952.66	0.559787	1.47405	0.112368	4.98171	6.3e-07	2.26e-06	XP_022847039.1	pumilio_homolog_2-like,_transcript_variant_X4	Olive	PF07990:Nucleic_acid_binding_protein_NABP//PF00806:Pumilio-family_RNA_binding_repeat
LOC111369668	1354.73	1.25686	2.38975	0.147256	8.53521	1.4e-17	1.08e-16	XP_022847040.1	protein_TOC75-3,_chloroplastic-like	Olive	PF01103:Surface_antigen
LOC111369671	314.416	0.909546	1.87845	0.170098	5.34718	8.93e-08	3.49e-07	XP_022847046.1	glucan_endo-1,3-beta-glucosidase_13-like	Olive	PF07983:X8_domain//PF00332:Glycosyl_hydrolases_family_17
LOC111369674	361.118	0.617228	1.53393	0.215676	2.86183	0.00421206	0.00888067	XP_022847047.1	protein_TOC75-3,_chloroplastic-like,_transcript_variant_X2	Olive	PF01103:Surface_antigen	IPR032675:Leucine-rich repeat domain superfamily//IPR011009:Protein kinase-like domain superfamily//IPR008271:Serine/threonine-protein kinase, active site//IPR000719:Protein kinase domain//IPR017441:Protein kinase, ATP binding site
LOC111369676	81.2695	1.6591	3.1582	0.372107	4.45867	8.25e-06	2.59e-05		uncharacterized_LOC111369676,_transcript_variant_X2	Olive		IPR012417:Calmodulin-binding domain, plant
LOC111369678	301.324	0.8979	1.86335	0.178094	5.04171	4.61e-07	1.68e-06	XP_022847049.1	uncharacterized_LOC111369678	Olive	PF12043:Domain_of_unknown_function_(DUF3527)	IPR001320:Ionotropic glutamate receptor//IPR017103:Ionotropic glutamate receptor, plant//IPR028082:Periplasmic binding protein-like I
LOC111369682	154.798	0.987008	1.98207	0.228506	4.31941	1.56e-05	4.74e-05		uncharacterized_LOC111369682	Olive
LOC111369692	437.793	1.0121	2.01684	0.148928	6.7959	1.08e-11	5.82e-11	XP_022847065.1	anthranilate_synthase_alpha_subunit_2,_chloroplastic-like	Olive	PF00425:chorismate_binding_enzyme//PF04715:Anthranilate_synthase_component_I,_N_terminal_region	IPR007699:SGS domain//IPR008978:HSP20-like chaperone//IPR037201:Calcyclin-binding protein, N-terminal//IPR037893:Calcyclin-binding Protein, CS domain//IPR007052:CS domain
LOC111369693	89.6039	3.0673	8.38202	0.359675	8.52797	1.49e-17	1.15e-16	XP_022847066.1	cell_division_control_protein_6_homolog_B	Olive	PF13401:AAA_domain//PF09079:CDC6,_C_terminal_winged_helix_domain//PF17872:AAA_lid_domain	IPR016135:Ubiquitin-conjugating enzyme/RWD-like//IPR000608:Ubiquitin-conjugating enzyme E2
LOC111369695	262.947	0.581785	1.4967	0.175966	3.30623	0.000945615	0.00222719	XP_022847070.1	sodium-dependent_phosphate_transport_protein_1,_chloroplastic-like,_transcript_variant_X2	Olive	PF07690:Major_Facilitator_Superfamily	IPR013328:6-phosphogluconate dehydrogenase, domain 2//IPR036291:NAD(P)-binding domain superfamily//IPR015815:3-hydroxyisobutyrate dehydrogenase-related//IPR008927:6-phosphogluconate dehydrogenase-like, C-terminal domain superfamily
LOC111369696	95.3863	1.60812	3.04854	0.335889	4.78764	1.69e-06	5.79e-06	XP_022847071.1	cytochrome_P450_86A1-like	Olive	PF00067:Cytochrome_P450	IPR023213:Chloramphenicol acetyltransferase-like domain superfamily
LOC111369697	594.352	1.31879	2.49456	0.142873	9.23047	2.69e-20	2.37e-19	XP_022847073.1	50S_ribosomal_protein_L4,_chloroplastic,_transcript_variant_X2	Olive	PF00573:Ribosomal_protein_L4/L1_family	IPR015947:PUA-like superfamily//IPR014729:Rossmann-like alpha/beta/alpha sandwich fold
LOC111369709	618.152	0.441371	1.35789	0.128837	3.42581	0.000612961	0.00148777	XP_022847098.1	uncharacterized_LOC111369709,_transcript_variant_X4	Olive		IPR000554:Ribosomal protein S7e
LOC111369715	79.4814	1.84169	3.58431	0.337237	5.46113	4.73e-08	1.9e-07	XP_022847108.1	zinc_finger_CCCH_domain-containing_protein_20-like	Olive	PF00642:Zinc_finger_C-x8-C-x5-C-x3-H_type_(and_similar)	IPR018108:Mitochondrial substrate/solute carrier//IPR023395:Mitochondrial carrier domain superfamily//IPR002067:Mitochondrial carrier protein
LOC111369716	1191.36	2.58104	5.98371	0.12452	20.7279	1.94e-95	1.1e-93	XP_022847104.1	probable_inactive_receptor_kinase_At5g58300	Olive	PF00069:Protein_kinase_domain//PF13855:Leucine_rich_repeat//PF08263:Leucine_rich_repeat_N-terminal_domain//PF00560:Leucine_Rich_Repeat	IPR036291:NAD(P)-binding domain superfamily//IPR011032:GroES-like superfamily//IPR020843:Polyketide synthase, enoylreductase domain//IPR002364:Quinone oxidoreductase/zeta-crystallin, conserved site
LOC111369717	548.019	1.33001	2.51405	0.164977	8.06181	7.52e-16	5.27e-15	XP_022847110.1	protein_NETWORKED_4B-like,_transcript_variant_X5	Olive	PF07765:KIP1-like_protein	IPR038132:Vps16, C-terminal domain superfamily//IPR011047:Quinoprotein alcohol dehydrogenase-like superfamily
LOC111369725	569.652	0.610128	1.5264	0.137686	4.43131	9.37e-06	2.92e-05	XP_022847127.1	U2_small_nuclear_ribonucleoprotein_B'',_transcript_variant_X2	Olive	PF00076:RNA_recognition_motif._(a.k.a._RRM,_RBD,_or_RNP_domain)	IPR011009:Protein kinase-like domain superfamily//IPR017441:Protein kinase, ATP binding site//IPR000719:Protein kinase domain//IPR008271:Serine/threonine-protein kinase, active site//IPR000961:AGC-kinase, C-terminal
LOC111369727	161.585	0.496484	1.41077	0.214921	2.31008	0.0208839	0.0382688		uncharacterized_LOC111369727,_transcript_variant_X2	Olive		IPR013097:Stress responsive alpha-beta barrel//IPR011008:Dimeric alpha-beta barrel
LOC111369732	72.3683	1.99827	3.9952	0.344365	5.80277	6.52e-09	2.85e-08	XP_022847133.1	glucan_endo-1,3-beta-glucosidase_9	Olive	PF07983:X8_domain//PF00332:Glycosyl_hydrolases_family_17
LOC111369733	230.896	1.31341	2.48529	0.201231	6.5269	6.71e-11	3.44e-10	XP_022847134.1	protein_LIGHT-DEPENDENT_SHORT_HYPOCOTYLS_6-like	Olive	PF04852:Protein_of_unknown_function_(DUF640)	IPR011990:Tetratricopeptide-like helical domain superfamily//IPR001214:SET domain//IPR002893:Zinc finger, MYND-type
LOC111369734	238.142	1.75618	3.37802	0.22137	7.93321	2.14e-15	1.46e-14	XP_022847136.1	40S_ribosomal_protein_S4-like,_transcript_variant_X2	Olive	PF08071:RS4NT_(NUC023)_domain//PF00467:KOW_motif//PF00900:Ribosomal_family_S4e//PF16121:40S_ribosomal_protein_S4_C-terminus//PF01479:S4_domain	IPR036514:SGNH hydrolase superfamily
LOC111369739	3483.11	0.318268	1.24683	0.112614	2.82619	0.0047106	0.00985029	XP_022847142.1	60S_ribosomal_protein_L32-1-like	Olive	PF01655:Ribosomal_protein_L32	IPR002885:Pentatricopeptide repeat//IPR011990:Tetratricopeptide-like helical domain superfamily
LOC111369745	237.255	0.822265	1.76818	0.191715	4.28899	1.79e-05	5.4e-05	XP_022847147.1	probable_xyloglucan_glycosyltransferase_6	Olive	PF13641:Glycosyltransferase_like_family_2	IPR000504:RNA recognition motif domain//IPR012677:Nucleotide-binding alpha-beta plait domain superfamily//IPR035979:RNA-binding domain superfamily
LOC111369750	409.539	0.86148	1.8169	0.153172	5.62426	1.86e-08	7.8e-08	XP_022847157.1	protein_NRT1/_PTR_FAMILY_5.2-like	Olive	PF00854:POT_family	IPR029000:Cyclophilin-like domain superfamily//IPR023222:PsbQ-like domain superfamily//IPR002130:Cyclophilin-type peptidyl-prolyl cis-trans isomerase domain
LOC111369754	174.327	2.93237	7.63363	0.266836	10.9894	4.3e-28	5.32e-27	XP_022847163.1	BRCA1-associated_RING_domain_protein_1-like,_transcript_variant_X2	Olive	PF13771:PHD-like_zinc-binding_domain//PF00533:BRCA1_C_Terminus_(BRCT)_domain//PF13920:Zinc_finger,_C3HC4_type_(RING_finger)	IPR036291:NAD(P)-binding domain superfamily
LOC111369757	397.893	0.369007	1.29146	0.165889	2.22442	0.02612	0.0466809			Olive
LOC111369764	138.93	0.662947	1.58331	0.233913	2.83417	0.00459456	0.00962439	XP_022847166.1	uncharacterized_LOC111369764	Olive		IPR000048:IQ motif, EF-hand binding site
LOC111369767	67.3444	1.51704	2.86203	0.354025	4.28511	1.83e-05	5.49e-05	XP_022847170.1	uncharacterized_LOC111369767	Olive
LOC111369768	51.0132	1.04887	2.06891	0.421799	2.48666	0.0128948	0.0247555	XP_022847171.1	LOB_domain-containing_protein_4	Olive	PF03195:Lateral_organ_boundaries_(LOB)_domain	IPR013785:Aldolase-type TIM barrel
LOC111369769	226.785	3.35823	10.2548	0.263753	12.7325	3.9e-37	6.48e-36	XP_022847172.1	uncharacterized_LOC111369769	Olive
LOC111369772	2632.11	0.554934	1.4691	0.155274	3.57391	0.000351695	0.000885385	XP_022847177.1	T-complex_protein_1_subunit_theta	Olive	PF00118:TCP-1/cpn60_chaperonin_family
LOC111369775	216.255	1.15477	2.22649	0.206385	5.59522	2.2e-08	9.15e-08	XP_022847179.1	glycine_oxidase,_transcript_variant_X2	Olive	PF01266:FAD_dependent_oxidoreductase	IPR001841:Zinc finger, RING-type//IPR013083:Zinc finger, RING/FYVE/PHD-type//IPR017907:Zinc finger, RING-type, conserved site
LOC111369777	913.866	0.49436	1.4087	0.119865	4.12429	3.72e-05	0.000107518	XP_022847183.1	6-phosphofructo-2-kinase/fructose-2,6-bisphosphatase,_transcript_variant_X4	Olive	PF01591:6-phosphofructo-2-kinase//PF00300:Histidine_phosphatase_superfamily_(branch_1)
LOC111369778	762.642	2.75634	6.75681	0.144449	19.0817	3.58e-81	1.63e-79	XP_022847185.1	protein_PMR5-like,_transcript_variant_X2	Olive	PF14416:PMR5_N_terminal_Domain//PF13839:GDSL/SGNH-like_Acyl-Esterase_family_found_in_Pmr5_and_Cas1p	IPR000916:Bet v I/Major latex protein//IPR023393:START-like domain superfamily//IPR024949:Bet v I type allergen
LOC111369782	402.315	1.33778	2.52762	0.182582	7.32702	2.35e-13	1.42e-12	XP_022847188.1	chaperone_protein_dnaJ_20,_chloroplastic-like	Olive	PF00226:DnaJ_domain	IPR027417:P-loop containing nucleoside triphosphate hydrolase
LOC111369783	910.625	1.06202	2.08785	0.147547	7.19784	6.12e-13	3.6e-12	XP_022847190.1	cytochrome_P450_82C4-like	Olive	PF00067:Cytochrome_P450
LOC111369786	161.025	1.62731	3.08937	0.25271	6.43944	1.2e-10	6.02e-10	XP_022847197.1	uncharacterized_LOC111369786	Olive
LOC111369787	180.095	1.40084	2.64055	0.239116	5.85839	4.67e-09	2.07e-08	XP_022847211.1	protein_SINE1-like,_transcript_variant_X2	Olive
LOC111369791	183.646	0.599615	1.51531	0.206293	2.90661	0.00365364	0.0077858	XP_022847209.1	cytochrome_b5	Olive	PF00173:Cytochrome_b5-like_Heme/Steroid_binding_domain	IPR036291:NAD(P)-binding domain superfamily
LOC111369796	842.422	0.347318	1.27219	0.141287	2.45825	0.0139615	0.0266148		uncharacterized_LOC111369796,_transcript_variant_X9	Olive
LOC111369797	80.3383	0.880456	1.84096	0.351759	2.50301	0.0123143	0.0237534	XP_022847221.1	uncharacterized_LOC111369797,_transcript_variant_X2	Olive
LOC111369798	310.712	0.52338	1.43732	0.177278	2.95232	0.00315398	0.0067851		uncharacterized_LOC111369798,_transcript_variant_X6	Olive		IPR006408:P-type ATPase, subfamily IIB//IPR023299:P-type ATPase, cytoplasmic domain N//IPR036412:HAD-like superfamily//IPR023214:HAD superfamily//IPR023298:P-type ATPase, transmembrane domain superfamily//IPR018303:P-type ATPase, phosphorylation site//IPR001757:P-type ATPase//IPR004014:Cation-transporting P-type ATPase, N-terminal//IPR008250:P-type ATPase, A domain superfamily
LOC111369802	150.088	0.753564	1.68595	0.25911	2.90828	0.00363421	0.00774686	XP_022847234.1	vacuolar_protein_sorting-associated_protein_51_homolog,_transcript_variant_X9	Olive		IPR001283:Cysteine-rich secretory protein-related//IPR014044:CAP domain//IPR035940:CAP superfamily//IPR018244:Allergen V5/Tpx-1-related, conserved site
LOC111369805	311.802	0.800982	1.74229	0.242199	3.30712	0.000942607	0.00222103	XP_022847236.1	calvin_cycle_protein_CP12-1,_chloroplastic	Olive	PF02672:CP12_domain
LOC111369811	213.791	1.38284	2.6078	0.220895	6.26016	3.85e-10	1.85e-09			Olive
LOC111369816	473.975	0.420547	1.33843	0.164219	2.56088	0.0104407	0.0204312	XP_022847251.1	piezo-type_mechanosensitive_ion_channel_homolog,_transcript_variant_X3	Olive	PF12166:Piezo_non-specific_cation_channel,_R-Ras-binding_domain	IPR001841:Zinc finger, RING-type//IPR013083:Zinc finger, RING/FYVE/PHD-type//IPR017907:Zinc finger, RING-type, conserved site
LOC111369817	72.9198	2.28698	4.88033	0.410574	5.5702	2.54e-08	1.05e-07	XP_022847252.1	probably_inactive_leucine-rich_repeat_receptor-like_protein_kinase_At2g25790	Olive	PF00560:Leucine_Rich_Repeat//PF08263:Leucine_rich_repeat_N-terminal_domain
LOC111369819	1966.28	2.847	7.19505	0.140669	20.239	4.44e-91	2.36e-89	XP_022847255.1	histone_H2AX-like	Olive	PF16211:C-terminus_of_histone_H2A//PF00125:Core_histone_H2A/H2B/H3/H4	IPR023222:PsbQ-like domain superfamily//IPR006311:Twin-arginine translocation pathway, signal sequence
LOC111369820	1070.9	1.64237	3.12178	0.159345	10.307	6.55e-25	7.08e-24	XP_022847256.1	histone_H2AX	Olive	PF00125:Core_histone_H2A/H2B/H3/H4//PF16211:C-terminus_of_histone_H2A
LOC111369826	292.359	1.21663	2.32403	0.173689	7.00466	2.48e-12	1.4e-11	XP_022847264.1	zinc_finger_CCCH_domain-containing_protein_32-like,_transcript_variant_X3	Olive	PF00642:Zinc_finger_C-x8-C-x5-C-x3-H_type_(and_similar)
LOC111369829	550.079	0.803921	1.74584	0.139046	5.7817	7.4e-09	3.21e-08	XP_022847289.1	auxin_response_factor_19-like,_transcript_variant_X3	Olive	PF02309:AUX/IAA_family//PF06507:Auxin_response_factor//PF02362:B3_DNA_binding_domain
LOC111369832	234.411	0.521762	1.43571	0.195804	2.66472	0.00770526	0.0154828			Olive
LOC111369833	63.5055	1.59883	3.02898	0.355339	4.49946	6.81e-06	2.16e-05	XP_022847286.1	uncharacterized_LOC111369833,_transcript_variant_X9	Olive		IPR036549:Cytochrome c oxidase, subunit VIb superfamily
LOC111369841	844.672	0.598666	1.51432	0.265925	2.25126	0.024369	0.0439085	XP_022847300.1	proteasome_subunit_beta_type-6-like	Olive	PF00227:Proteasome_subunit
LOC111369851	78.9358	0.796659	1.73707	0.351338	2.2675	0.0233596	0.0422574	XP_022847311.1	gamma-tubulin_complex_component_4_homolog	Olive	PF17681:Gamma_tubulin_complex_component_N-terminal//PF04130:Gamma_tubulin_complex_component_C-terminal	IPR013763:Cyclin-like//IPR004367:Cyclin, C-terminal domain//IPR036915:Cyclin-like superfamily
LOC111369858	887.811	2.46409	5.51779	0.153188	16.0854	3.23e-58	9.57e-57	XP_022847322.1	kinesin-like_protein_KIN-14I,_transcript_variant_X2	Olive	PF00225:Kinesin_motor_domain//PF00307:Calponin_homology_(CH)_domain
LOC111369862	59.7299	0.978029	1.96977	0.344132	2.84202	0.00448287	0.00940742	XP_022847328.1	GATA_transcription_factor_15-like	Olive	PF00320:GATA_zinc_finger	IPR002292:Ornithine/putrescine carbamoyltransferase//IPR024904:Ornithine carbamoyltransferase//IPR036901:Aspartate/ornithine carbamoyltransferase superfamily//IPR006130:Aspartate/ornithine carbamoyltransferase
LOC111369870	106.662	4.3753	20.7537	0.452075	9.67825	3.73e-22	3.59e-21	XP_022847347.1	phospholipase_A2-alpha-like	Olive
LOC111369874	200.664	2.45419	5.48004	0.233534	10.5089	7.86e-26	8.81e-25	XP_022847349.1	uncharacterized_LOC111369874	Olive
LOC111369875	88.3145	1.36746	2.58016	0.304229	4.49484	6.96e-06	2.21e-05	XP_022847352.1	uncharacterized_LOC111369875	Olive	PF01936:NYN_domain//PF14418:OST-HTH_Associated_domain//PF12872:OST-HTH/LOTUS_domain
LOC111369882	88.5439	0.838645	1.78837	0.308207	2.72105	0.00650758	0.0132656	XP_022847360.1	exosome_complex_component_RRP4_homolog,_transcript_variant_X2	Olive	PF15985:KH_domain	IPR000571:Zinc finger, CCCH-type
LOC111369904	1371.37	0.551827	1.46594	0.123297	4.47558	7.62e-06	2.4e-05	XP_022847383.1	zinc_finger_CCCH_domain-containing_protein_14-like	Olive	PF00013:KH_domain//PF00642:Zinc_finger_C-x8-C-x5-C-x3-H_type_(and_similar)	IPR001360:Glycoside hydrolase family 1//IPR033132:Glycosyl hydrolases family 1, N-terminal conserved site//IPR017853:Glycoside hydrolase superfamily
LOC111369905	3402.91	1.83993	3.57992	0.140314	13.1129	2.78e-39	4.96e-38	XP_022847385.1	callose_synthase_3-like,_transcript_variant_X2	Olive	PF02364:1,3-beta-glucan_synthase_component//PF14288:1,3-beta-glucan_synthase_subunit_FKS1,_domain-1//PF04652:Vta1_like
LOC111369906	600.548	0.837708	1.78721	0.143943	5.81971	5.89e-09	2.58e-08			Olive
LOC111369910	64.1181	2.82248	7.0738	0.404603	6.97593	3.04e-12	1.71e-11	XP_022847394.1	auxin_response_factor_10-like,_transcript_variant_X3	Olive	PF06507:Auxin_response_factor//PF02362:B3_DNA_binding_domain	IPR001849:Pleckstrin homology domain//IPR023393:START-like domain superfamily//IPR002913:START domain//IPR011993:PH-like domain superfamily
LOC111369921	232.388	1.16817	2.24727	0.206242	5.66409	1.48e-08	6.26e-08	XP_022847419.1	GPI_mannosyltransferase_1-like,_transcript_variant_X2	Olive	PF05007:Mannosyltransferase_(PIG-M)	IPR033131:Pectinesterase, Asp active site//IPR035513:Invertase/pectin methylesterase inhibitor domain superfamily//IPR006501:Pectinesterase inhibitor domain//IPR012334:Pectin lyase fold//IPR011050:Pectin lyase fold/virulence factor
LOC111369923	1483.35	1.01471	2.0205	0.174678	5.80904	6.28e-09	2.75e-08	XP_022847422.1	proteasome_subunit_beta_type-4	Olive	PF00227:Proteasome_subunit	IPR001752:Kinesin motor domain//IPR036961:Kinesin motor domain superfamily//IPR027417:P-loop containing nucleoside triphosphate hydrolase//IPR019821:Kinesin motor domain, conserved site
LOC111369928	151.143	3.1874	9.10967	0.294711	10.8153	2.91e-27	3.47e-26	XP_022847429.1	fasciclin-like_arabinogalactan_protein_12	Olive	PF02469:Fasciclin_domain	IPR006580:Zinc finger, TTF-type//IPR012337:Ribonuclease H-like superfamily
LOC111369931	7049.98	3.41648	10.6773	0.217243	15.7265	9.96e-56	2.76e-54	XP_022847432.1	4-hydroxy-3-methylbut-2-en-1-yl_diphosphate_synthase_(ferredoxin),_chloroplastic-like	Olive	PF04551:GcpE_protein
LOC111369946	740.121	0.959821	1.94507	0.125691	7.63637	2.23e-14	1.44e-13	XP_022847450.1	ESCRT-related_protein_CHMP1B-like	Olive	PF03357:Snf7
LOC111369949	456.286	0.352013	1.27634	0.143927	2.44577	0.0144543	0.0274562	XP_022847452.1	polyadenylate-binding_protein_RBP47B',_transcript_variant_X2	Olive	PF00076:RNA_recognition_motif._(a.k.a._RRM,_RBD,_or_RNP_domain)	IPR001680:WD40 repeat//IPR017986:WD40-repeat-containing domain//IPR036322:WD40-repeat-containing domain superfamily//IPR020472:G-protein beta WD-40 repeat
LOC111369951	54.5333	1.84738	3.59846	0.393219	4.69809	2.63e-06	8.78e-06	XP_022847454.1	putative_pentatricopeptide_repeat-containing_protein_At3g11460,_mitochondrial	Olive	PF01535:PPR_repeat//PF13041:PPR_repeat_family//PF14432:DYW_family_of_nucleic_acid_deaminases	IPR000719:Protein kinase domain//IPR011009:Protein kinase-like domain superfamily//IPR008271:Serine/threonine-protein kinase, active site//IPR017441:Protein kinase, ATP binding site//IPR018451:NAF/FISL domain
LOC111369955	294.594	0.675197	1.59681	0.169785	3.97678	6.99e-05	0.000194868	XP_022847460.1	dof_zinc_finger_protein_DOF3.1-like	Olive	PF02701:Dof_domain,_zinc_finger	IPR011993:PH-like domain superfamily//IPR004182:GRAM domain
LOC111369957	365.831	0.50845	1.42252	0.179801	2.82785	0.00468619	0.00980229	XP_022847459.1	DDT_domain-containing_protein_PTM,_transcript_variant_X4	Olive	PF02791:DDT_domain//PF00628:PHD-finger	IPR001876:Zinc finger, RanBP2-type//IPR013536:WLM domain//IPR036443:Zinc finger, RanBP2-type superfamily
LOC111369959	237.122	0.57868	1.49348	0.201133	2.87711	0.0040134	0.00849592	XP_022847463.1	pseudouridine-5'-phosphate_glycosidase,_transcript_variant_X2	Olive	PF04227:Indigoidine_synthase_A_like_protein
LOC111369961	59.9931	0.988466	1.98407	0.420671	2.34974	0.0187867	0.034761	XP_022847465.1	protein_PATRONUS_2,_transcript_variant_X2	Olive		IPR021109:Aspartic peptidase domain superfamily//IPR001969:Aspartic peptidase, active site//IPR001461:Aspartic peptidase A1 family//IPR033121:Peptidase family A1 domain
LOC111369965	432.104	0.976832	1.96814	0.155313	6.28942	3.19e-10	1.55e-09	XP_022847469.1	uncharacterized_LOC111369965	Olive	PF00168:C2_domain	IPR008271:Serine/threonine-protein kinase, active site//IPR000719:Protein kinase domain//IPR017441:Protein kinase, ATP binding site//IPR011009:Protein kinase-like domain superfamily//IPR001245:Serine-threonine/tyrosine-protein kinase, catalytic domain
LOC111369995	55.1196	1.11436	2.16499	0.437047	2.54975	0.01078	0.0210303	XP_022847482.1	probable_transcription_factor_At1g61730	Olive	PF04504:Protein_of_unknown_function,_DUF573	IPR000999:Ribonuclease III domain//IPR036389:Ribonuclease III, endonuclease domain superfamily
LOC111370030	98.8975	0.830377	1.77815	0.278115	2.98573	0.00282901	0.00614933	XP_022847517.1	squamosa_promoter-binding-like_protein_9,_transcript_variant_X3	Olive	PF03110:SBP_domain	IPR003165:Piwi domain//IPR036397:Ribonuclease H superfamily//IPR012337:Ribonuclease H-like superfamily
LOC111370037	1030.73	2.10903	4.314	0.126497	16.6726	2.08e-62	6.66e-61	XP_022847518.1	berberine_bridge_enzyme-like_15	Olive	PF01565:FAD_binding_domain//PF08031:Berberine_and_berberine_like	IPR000757:Glycoside hydrolase family 16//IPR016455:Xyloglucan endotransglucosylase/hydrolase//IPR013320:Concanavalin A-like lectin/glucanase domain superfamily
LOC111370048	735.722	0.643067	1.56165	0.140684	4.57099	4.85e-06	1.57e-05	XP_022847527.1	caffeoylshikimate_esterase-like	Olive	PF12146:Serine_aminopeptidase,_S33
LOC111370056	472.061	2.7053	6.52196	0.192358	14.0639	6.33e-45	1.34e-43	XP_022847536.1	probably_inactive_leucine-rich_repeat_receptor-like_protein_kinase_At5g06940	Olive	PF08263:Leucine_rich_repeat_N-terminal_domain//PF00069:Protein_kinase_domain//PF13855:Leucine_rich_repeat	IPR033467:Tesmin/TSO1-like CXC domain//IPR005172:CRC domain
LOC111370077	142.216	2.95278	7.74237	0.31629	9.33565	1e-20	8.98e-20	XP_022847553.1	nucleobase-ascorbate_transporter_2-like	Olive	PF00860:Permease_family
LOC111370079	369.971	0.564442	1.47881	0.157156	3.59161	0.000328642	0.000831206	XP_022847555.1	1-acyl-sn-glycerol-3-phosphate_acyltransferase_2-like	Olive	PF01553:Acyltransferase//PF16076:Acyltransferase_C-terminus	IPR007527:Zinc finger, SWIM-type//IPR006564:Zinc finger, PMZ-type
LOC111370088	166.527	0.952584	1.93534	0.249835	3.81286	0.000137369	0.000367035	XP_022847559.1	anaphase-promoting_complex_subunit_4	Olive	PF12894:Anaphase-promoting_complex_subunit_4_WD40_domain//PF12896:Anaphase-promoting_complex,_cyclosome,_subunit_4
LOC111370102	203.5	0.577984	1.49276	0.228813	2.52601	0.0115368	0.0223795	XP_022847572.1	MACPF_domain-containing_protein_NSL1-like	Olive	PF01823:MAC/Perforin_domain
LOC111370108	278.678	0.799017	1.73992	0.177039	4.51321	6.39e-06	2.03e-05	XP_022847579.1	pentatricopeptide_repeat-containing_protein_At3g13150-like	Olive	PF01535:PPR_repeat//PF13041:PPR_repeat_family	IPR036908:RlpA-like domain superfamily//IPR007112:Expansin/pollen allergen, DPBB domain
LOC111370124	612.421	1.1199	2.17332	0.156416	7.15975	8.08e-13	4.71e-12	XP_022847596.1	small_nuclear_ribonucleoprotein_SmD3b-like	Olive	PF01423:LSM_domain	IPR027417:P-loop containing nucleoside triphosphate hydrolase//IPR005225:Small GTP-binding protein domain
LOC111370167	635.269	1.793	3.46534	0.16971	10.5651	4.33e-26	4.91e-25	XP_022847630.1	probable_leucine-rich_repeat_receptor-like_serine/threonine-protein_kinase_At3g14840	Olive	PF13855:Leucine_rich_repeat//PF07714:Protein_tyrosine_kinase//PF11721:Malectin_domain
LOC111370201	61.1379	0.885121	1.84692	0.362493	2.44176	0.0146158	0.0277301	XP_022847657.1	heat_shock_protein_90-6,_mitochondrial-like	Olive
LOC111370236	150.218	0.601654	1.51746	0.220339	2.73058	0.00632231	0.0129177	XP_022847691.1	thioredoxin_reductase_NTRC-like	Olive	PF07992:Pyridine_nucleotide-disulphide_oxidoreductase//PF00085:Thioredoxin
LOC111370290	764.289	1.31702	2.49151	0.150841	8.73119	2.52e-18	2.02e-17	XP_022847736.1	nuclear_pore_complex_protein_NUP93A-like	Olive	PF04097:Nup93/Nic96	IPR001841:Zinc finger, RING-type//IPR013083:Zinc finger, RING/FYVE/PHD-type
LOC111370341	139.605	0.593697	1.50911	0.232779	2.55047	0.0107577	0.0209905		uncharacterized_LOC111370341,_transcript_variant_X9	Olive		IPR011990:Tetratricopeptide-like helical domain superfamily//IPR019734:Tetratricopeptide repeat//IPR013026:Tetratricopeptide repeat-containing domain
LOC111370342	410.508	0.620551	1.53746	0.154378	4.01967	5.83e-05	0.000164207		uncharacterized_LOC111370342	Olive		IPR000608:Ubiquitin-conjugating enzyme E2//IPR016135:Ubiquitin-conjugating enzyme/RWD-like
LOC111370344	294.214	1.82406	3.54077	0.204067	8.93856	3.94e-19	3.28e-18	XP_022847778.1	uncharacterized_LOC111370344	Olive
LOC111370352	102.342	2.50498	5.67642	0.347418	7.21029	5.58e-13	3.29e-12	XP_022847805.1	uncharacterized_LOC111370352,_transcript_variant_X3	Olive	PF00533:BRCA1_C_Terminus_(BRCT)_domain
LOC111370353	679.361	0.449655	1.36571	0.132648	3.38985	0.000699321	0.001681	XP_022847790.1	uncharacterized_LOC111370353,_transcript_variant_X2	Olive
LOC111370354	122.266	1.10981	2.15817	0.253999	4.36934	1.25e-05	3.83e-05	XP_022847793.1	zinc_finger_protein_CONSTANS-LIKE_9-like,_transcript_variant_X2	Olive
LOC111370356	373.895	0.53964	1.45361	0.154646	3.48952	0.000483897	0.00119162	XP_022847795.1	actin-related_protein_7,_transcript_variant_X3	Olive	PF00022:Actin	IPR011009:Protein kinase-like domain superfamily
LOC111370359	185.949	1.33982	2.53119	0.251427	5.32886	9.88e-08	3.84e-07	XP_022847798.1	uncharacterized_LOC111370359,_transcript_variant_X2	Olive		IPR011050:Pectin lyase fold/virulence factor//IPR006501:Pectinesterase inhibitor domain//IPR035513:Invertase/pectin methylesterase inhibitor domain superfamily//IPR012334:Pectin lyase fold
LOC111370368	73.9872	0.83511	1.78399	0.344766	2.42225	0.0154247	0.0291154	XP_022847812.1	GTP-binding_protein_ERG-like	Olive	PF01926:50S_ribosome-binding_GTPase	IPR001356:Homeobox domain//IPR002913:START domain//IPR023393:START-like domain superfamily//IPR009057:Homeobox-like domain superfamily
LOC111370381	5812.2	3.86755	14.5965	0.174006	22.2266	1.9e-109	1.31e-107	XP_022847830.1	36.4_kDa_proline-rich_protein-like	Olive	PF14547:Hydrophobic_seed_protein
LOC111370382	530.057	0.408882	1.32766	0.146775	2.78578	0.00533998	0.0110625	XP_022847831.1	putative_UDP-glucose_flavonoid_3-O-glucosyltransferase_3	Olive	PF00201:UDP-glucoronosyl_and_UDP-glucosyl_transferase
LOC111370390	398.516	0.562922	1.47726	0.159449	3.53043	0.000414886	0.00103249	XP_022847840.1	scarecrow-like_protein_23	Olive	PF03514:GRAS_domain_family
LOC111370402	1731.93	1.87328	3.66364	0.18356	10.2053	1.88e-24	1.99e-23	XP_022847859.1	xyloglucan_endotransglucosylase/hydrolase_protein_9-like,_transcript_variant_X2	Olive	PF06955:Xyloglucan_endo-transglycosylase_(XET)_C-terminus//PF00722:Glycosyl_hydrolases_family_16
LOC111370403	739.783	1.7739	3.41976	0.547188	3.24184	0.00118761	0.0027528	XP_022847860.1	xyloglucan_endotransglucosylase/hydrolase_protein_9-like	Olive	PF00722:Glycosyl_hydrolases_family_16//PF06955:Xyloglucan_endo-transglycosylase_(XET)_C-terminus
LOC111370409	1173.81	0.713155	1.63938	0.133748	5.33206	9.71e-08	3.78e-07	XP_022847866.1	homeobox-leucine_zipper_protein_HOX11-like	Olive	PF02183:Homeobox_associated_leucine_zipper//PF00046:Homeodomain	IPR036259:MFS transporter superfamily//IPR004667:ADP/ATP carrier protein
LOC111370413	374.647	3.62537	12.3409	0.209913	17.2708	7.8e-67	2.7e-65	XP_022847872.1	uncharacterized_LOC111370413	Olive		IPR013087:Zinc finger C2H2-type//IPR036236:Zinc finger C2H2 superfamily//IPR003347:JmjC domain
LOC111370415	537.82	0.437066	1.35385	0.192759	2.26742	0.0233643	0.0422637	XP_022847873.1	callose_synthase_12-like	Olive	PF14288:1,3-beta-glucan_synthase_subunit_FKS1,_domain-1//PF02364:1,3-beta-glucan_synthase_component
LOC111370427	327.805	0.445325	1.36162	0.174472	2.55242	0.0106979	0.0208834	XP_022847889.1	tRNA_(guanine-N(7)-)-methyltransferase	Olive	PF02390:Putative_methyltransferase	IPR008271:Serine/threonine-protein kinase, active site//IPR011009:Protein kinase-like domain superfamily//IPR000719:Protein kinase domain//IPR017441:Protein kinase, ATP binding site
LOC111370431	1334.14	0.370733	1.29301	0.130114	2.84929	0.00438174	0.00921187	XP_022847897.1	protein_CHROMATIN_REMODELING_4-like,_transcript_variant_X4	Olive	PF00628:PHD-finger//PF06465:Domain_of_Unknown_Function_(DUF1087)//PF00385:Chromo_(CHRromatin_Organisation_MOdifier)_domain//PF00176:SNF2_family_N-terminal_domain//PF00271:Helicase_conserved_C-terminal_domain	IPR036852:Peptidase S8/S53 domain superfamily
LOC111370434	381.557	0.40281	1.32208	0.170746	2.35912	0.0183182	0.0339745	XP_022847903.1	copper-transporting_ATPase_RAN1	Olive	PF00702:haloacid_dehalogenase-like_hydrolase//PF00122:E1-E2_ATPase//PF00403:Heavy-metal-associated_domain	IPR013026:Tetratricopeptide repeat-containing domain//IPR019734:Tetratricopeptide repeat//IPR011990:Tetratricopeptide-like helical domain superfamily
LOC111370437	62.0654	1.32107	2.49852	0.348325	3.79264	0.000149052	0.000396297	XP_022847908.1	GTP-binding_protein_ERG-like	Olive	PF07650:KH_domain	IPR019770:Eukaryotic translation initiation factor 4E (eIF-4E), conserved site//IPR023398:Translation Initiation factor eIF- 4e-like
LOC111370440	162.825	0.913854	1.88407	0.219122	4.17054	3.04e-05	8.87e-05	XP_022847912.1	phosphatidate_cytidylyltransferase,_mitochondrial,_transcript_variant_X3	Olive	PF09139:Phosphatidate_cytidylyltransferase,_mitochondrial	IPR008271:Serine/threonine-protein kinase, active site//IPR000719:Protein kinase domain//IPR011009:Protein kinase-like domain superfamily
LOC111370442	1626.59	0.444916	1.36123	0.107809	4.12687	3.68e-05	0.000106431	XP_022847914.1	40S_ribosomal_protein_S28-2-like	Olive	PF01200:Ribosomal_protein_S28e
LOC111370444	900.701	2.55485	5.87607	0.137724	18.5505	8.08e-77	3.39e-75	XP_022847916.1	putative_E3_ubiquitin-protein_ligase_LIN-1	Olive
LOC111370449	261.296	0.711326	1.63731	0.176701	4.0256	5.68e-05	0.000160557	XP_022847929.1	U-box_domain-containing_protein_30-like	Olive	PF04564:U-box_domain	IPR008580:PPPDE putative peptidase domain//IPR042266:PPPDE putative peptidase domain superfamily
LOC111370457	133.322	2.10694	4.30777	0.360228	5.84891	4.95e-09	2.18e-08	XP_022847939.1	vacuolar_protein_sorting-associated_protein_2_homolog_2	Olive	PF03357:Snf7	IPR002891:Adenylyl-sulfate kinase//IPR027417:P-loop containing nucleoside triphosphate hydrolase
LOC111370464	388.744	2.91053	7.51896	0.18736	15.5344	2.03e-54	5.48e-53	XP_022847946.1	patellin-4-like	Olive	PF03765:CRAL/TRIO,_N-terminal_domain//PF00650:CRAL/TRIO_domain
LOC111370475	1763.78	2.4847	5.59717	0.118807	20.9138	4.01e-97	2.32e-95	XP_022847961.1	probable_LRR_receptor-like_serine/threonine-protein_kinase_At4g20940,_transcript_variant_X5	Olive	PF13855:Leucine_rich_repeat//PF07714:Protein_tyrosine_kinase//PF13516:Leucine_Rich_repeat	IPR000270:PB1 domain
LOC111370482	195.501	0.816781	1.76147	0.204373	3.99652	6.43e-05	0.000180166	XP_022847966.1	50S_ribosomal_protein_L20-like	Olive	PF00453:Ribosomal_protein_L20
LOC111370485	972.314	0.280445	1.21457	0.118938	2.35791	0.0183784	0.034073	XP_022847972.1	cationic_amino_acid_transporter_1-like,_transcript_variant_X3	Olive	PF13906:C-terminus_of_AA_permease//PF13520:Amino_acid_permease	IPR003851:Zinc finger, Dof-type
LOC111370494	165.492	5.70735	52.2497	0.498839	11.4413	2.6e-30	3.47e-29	XP_022847981.1	tyrosine/DOPA_decarboxylase_1-like,_transcript_variant_X2	Olive	PF00282:Pyridoxal-dependent_decarboxylase_conserved_domain
LOC111370501	1128.55	1.00108	2.0015	0.137081	7.30285	2.82e-13	1.69e-12	XP_022847985.1	auxin_response_factor_6-like	Olive	PF02362:B3_DNA_binding_domain//PF06507:Auxin_response_factor	IPR015943:WD40/YVTN repeat-like-containing domain superfamily
LOC111370504	153.105	1.16125	2.2365	0.252549	4.5981	4.26e-06	1.39e-05	XP_022847990.1	ras-related_protein_RABA1c	Olive	PF00071:Ras_family	IPR036181:MIT domain superfamily//IPR007330:MIT//IPR027417:P-loop containing nucleoside triphosphate hydrolase
LOC111370511	292.052	1.56544	2.95968	0.195534	8.00597	1.19e-15	8.23e-15	XP_022847998.1	aquaporin_NIP1-1-like	Olive	PF00230:Major_intrinsic_protein
LOC111370516	1488.7	0.373004	1.29505	0.120143	3.10466	0.001905	0.00426574	XP_022848012.1	protein_MAIN-LIKE_2-like,_transcript_variant_X2	Olive	PF10536:Plant_mobile_domain	IPR001878:Zinc finger, CCHC-type//IPR036875:Zinc finger, CCHC-type superfamily
LOC111370518	2165.35	0.472747	1.38775	0.144221	3.27794	0.00104569	0.00244422	XP_022848004.1	pyruvate_decarboxylase_1	Olive	PF00205:Thiamine_pyrophosphate_enzyme,_central_domain//PF02775:Thiamine_pyrophosphate_enzyme,_C-terminal_TPP_binding_domain//PF02776:Thiamine_pyrophosphate_enzyme,_N-terminal_TPP_binding_domain	IPR020084:NUDIX hydrolase, conserved site//IPR015797:NUDIX hydrolase-like domain superfamily//IPR000086:NUDIX hydrolase domain
LOC111370521	85.5353	1.06941	2.09858	0.294499	3.6313	0.000282001	0.000720666	XP_022848010.1	transcription_factor_TCP3-like	Olive	PF03634:TCP_family_transcription_factor	IPR029058:Alpha/Beta hydrolase fold
LOC111370522	373.687	1.40701	2.65186	0.172344	8.16395	3.24e-16	2.32e-15		uncharacterized_LOC111370522,_transcript_variant_X5	Olive
LOC111370526	117.227	1.21249	2.31737	0.28119	4.31198	1.62e-05	4.89e-05	XP_022848015.1	receptor-like_protein_51	Olive	PF13855:Leucine_rich_repeat	IPR002885:Pentatricopeptide repeat//IPR011990:Tetratricopeptide-like helical domain superfamily
LOC111370536	173.038	2.42525	5.37122	0.242225	10.0124	1.34e-23	1.38e-22	XP_022848048.1	protein_SCAR1-like,_transcript_variant_X2	Olive		IPR009057:Homeobox-like domain superfamily//IPR001005:SANT/Myb domain//IPR017930:Myb domain
LOC111370537	112.021	0.871419	1.82946	0.289035	3.01492	0.00257047	0.00562845	XP_022848053.1	ubiquitin-like_modifier-activating_enzyme_atg7,_transcript_variant_X5	Olive	PF16420:Ubiquitin-like_modifier-activating_enzyme_ATG7_N-terminus
LOC111370548	76.7292	2.80665	6.99657	0.385546	7.27967	3.35e-13	2e-12	XP_022848068.1	uncharacterized_LOC111370548	Olive		IPR002110:Ankyrin repeat//IPR020683:Ankyrin repeat-containing domain//IPR036770:Ankyrin repeat-containing domain superfamily
LOC111370567	494.062	1.50229	2.83292	0.155963	9.63233	5.84e-22	5.57e-21	XP_022848100.1	protein_STRUBBELIG-RECEPTOR_FAMILY_3-like,_transcript_variant_X3	Olive	PF07714:Protein_tyrosine_kinase//PF08263:Leucine_rich_repeat_N-terminal_domain//PF13855:Leucine_rich_repeat
LOC111370574	138.694	1.98004	3.94505	0.44383	4.46126	8.15e-06	2.56e-05	XP_022848131.1	basic_salivary_proline-rich_protein_2-like,_transcript_variant_X9	Olive	PF06943:LSD1_zinc_finger	IPR027078:Small nuclear ribonucleoprotein E//IPR001163:LSM domain, eukaryotic/archaea-type//IPR010920:LSM domain superfamily
LOC111370575	202.558	0.521023	1.43497	0.234725	2.21972	0.0264379	0.0471664	XP_022848120.1	haloacid_dehalogenase-like_hydrolase_domain-containing_protein_3	Olive	PF13419:Haloacid_dehalogenase-like_hydrolase	IPR036397:Ribonuclease H superfamily//IPR012337:Ribonuclease H-like superfamily
LOC111370577	485.358	1.03291	2.04615	0.189185	5.4598	4.77e-08	1.92e-07		callose_synthase_11-like	Olive		IPR006963:Molybdopterin oxidoreductase, 4Fe-4S domain//IPR000283:NADH:ubiquinone oxidoreductase, 75kDa subunit, conserved site//IPR010228:NADH:ubiquinone oxidoreductase, subunit G//IPR001041:2Fe-2S ferredoxin-type iron-sulfur binding domain//IPR036010:2Fe-2S ferredoxin-like superfamily//IPR019574:NADH:ubiquinone oxidoreductase, subunit G, iron-sulphur binding
LOC111370580	582.905	1.11739	2.16954	0.193186	5.78402	7.29e-09	3.17e-08	XP_022848135.1	probable_pre-mRNA-splicing_factor_ATP-dependent_RNA_helicase_DEAH9	Olive	PF00271:Helicase_conserved_C-terminal_domain//PF07717:Oligonucleotide/oligosaccharide-binding_(OB)-fold//PF04408:Helicase_associated_domain_(HA2)
LOC111370581	578.502	0.898567	1.86421	0.171764	5.23139	1.68e-07	6.39e-07	XP_022848136.1	glutamate_receptor_2.7-like	Olive	PF00497:Bacterial_extracellular_solute-binding_proteins,_family_3//PF00060:Ligand-gated_ion_channel//PF01094:Receptor_family_ligand_binding_region
LOC111370587	161.265	1.76329	3.39471	0.244347	7.21634	5.34e-13	3.15e-12	XP_022848146.1	protein_NUCLEAR_FUSION_DEFECTIVE_6,_chloroplastic/mitochondrial-like,_transcript_variant_X4	Olive		IPR000242:PTP type protein phosphatase//IPR016130:Protein-tyrosine phosphatase, active site//IPR003595:Protein-tyrosine phosphatase, catalytic//IPR029021:Protein-tyrosine phosphatase-like//IPR000387:Tyrosine specific protein phosphatases domain
LOC111370590	6255.66	1.83492	3.56752	0.102196	17.9549	4.39e-72	1.68e-70	XP_022848149.1	triose_phosphate/phosphate_translocator,_chloroplastic	Olive	PF03151:Triose-phosphate_Transporter_family	IPR018247:EF-Hand 1, calcium-binding site//IPR011992:EF-hand domain pair//IPR002048:EF-hand domain
LOC111370593	878.965	1.29122	2.44735	0.13824	9.3404	9.6e-21	8.6e-20	XP_022848151.1	receptor-like_protein_kinase_HSL1	Olive	PF08263:Leucine_rich_repeat_N-terminal_domain//PF12799:Leucine_Rich_repeats_(2_copies)//PF00069:Protein_kinase_domain	IPR029063:S-adenosyl-L-methionine-dependent methyltransferase//IPR030374:Polyamine biosynthesis domain//IPR037163:Spermidine synthase, tetramerisation domain superfamily
LOC111370595	554.448	0.470701	1.38578	0.171721	2.74108	0.00612375	0.0125463	XP_022848154.1	glutaredoxin-C9-like	Olive	PF00462:Glutaredoxin	IPR001356:Homeobox domain//IPR006563:POX domain//IPR009057:Homeobox-like domain superfamily
LOC111370596	253.207	2.24467	4.73929	0.223126	10.0601	8.29e-24	8.56e-23	XP_022848157.1	auxin_response_factor_3-like,_transcript_variant_X3	Olive	PF02362:B3_DNA_binding_domain//PF06507:Auxin_response_factor
LOC111370598	60.2393	0.97236	1.96205	0.350729	2.7724	0.00556454	0.0114874		uncharacterized_LOC111370598,_transcript_variant_X5	Olive
LOC111370603	62.5325	1.41403	2.6648	0.356682	3.96439	7.36e-05	0.000204759	XP_022848163.1	G-type_lectin_S-receptor-like_serine/threonine-protein_kinase_At1g11300	Olive	PF00069:Protein_kinase_domain//PF00954:S-locus_glycoprotein_domain//PF01453:D-mannose_binding_lectin//PF08276:PAN-like_domain
LOC111370607	156.982	1.79653	3.47383	0.240681	7.46435	8.37e-14	5.19e-13	XP_022848170.1	putative_H/ACA_ribonucleoprotein_complex_subunit_1-like_protein_1	Olive	PF04410:Gar1/Naf1_RNA_binding_region	IPR001789:Signal transduction response regulator, receiver domain//IPR011006:CheY-like superfamily
LOC111370611	426.148	0.919749	1.89179	0.155099	5.93007	3.03e-09	1.36e-08	XP_022848173.1	putative_PAP-specific_phosphatase,_mitochondrial,_transcript_variant_X3	Olive	PF00459:Inositol_monophosphatase_family
LOC111370612	440.631	0.440922	1.35747	0.159887	2.75771	0.00582081	0.0119753	XP_022848174.1	vesicle-associated_protein_4-2-like	Olive	PF00635:MSP_(Major_sperm_protein)_domain	IPR004808:AP endonuclease 1//IPR036691:Endonuclease/exonuclease/phosphatase superfamily//IPR036361:SAP domain superfamily//IPR020848:AP endonuclease 1, conserved site//IPR020847:AP endonuclease 1, binding site//IPR003034:SAP domain
LOC111370621	229.641	0.5855	1.50056	0.20419	2.86743	0.00413822	0.0087398		uncharacterized_LOC111370621	Olive		IPR002048:EF-hand domain//IPR018247:EF-Hand 1, calcium-binding site//IPR011992:EF-hand domain pair
LOC111370623	1236.48	0.554899	1.46907	0.132562	4.18597	2.84e-05	8.33e-05	XP_022848199.1	mediator_of_RNA_polymerase_II_transcription_subunit_16,_transcript_variant_X2	Olive		IPR000719:Protein kinase domain//IPR011009:Protein kinase-like domain superfamily//IPR008271:Serine/threonine-protein kinase, active site
LOC111370624	185.571	2.76253	6.78584	0.248707	11.1075	1.15e-28	1.46e-27	XP_022848205.1	protein_SINE1-like	Olive		IPR027417:P-loop containing nucleoside triphosphate hydrolase
LOC111370628	804.906	0.530867	1.4448	0.147845	3.5907	0.000329792	0.000833802	XP_022848211.1	endonuclease_4-like,_transcript_variant_X3	Olive	PF02265:S1/P1_Nuclease	IPR013320:Concanavalin A-like lectin/glucanase domain superfamily//IPR008263:Glycoside hydrolase, family 16, active site//IPR000757:Glycoside hydrolase family 16
LOC111370636	325.746	0.979962	1.97241	0.178675	5.48461	4.14e-08	1.68e-07	XP_022848222.1	B3_domain-containing_transcription_repressor_VAL2-like,_transcript_variant_X6	Olive	PF07496:CW-type_Zinc_Finger//PF02362:B3_DNA_binding_domain	IPR013083:Zinc finger, RING/FYVE/PHD-type//IPR000225:Armadillo//IPR016024:Armadillo-type fold//IPR011989:Armadillo-like helical//IPR003613:U box domain
LOC111370637	347.671	0.898618	1.86428	0.175539	5.11921	3.07e-07	1.14e-06	XP_022848223.1	ribosomal_RNA-processing_protein_17	Olive	PF09805:Nucleolar_protein_12_(25kDa)
LOC111370640	415.37	0.84284	1.79358	0.202344	4.16538	3.11e-05	9.07e-05	XP_022848227.1	ATP-dependent_DNA_helicase_Q-like_3,_transcript_variant_X2	Olive	PF16124:RecQ_zinc-binding	IPR027417:P-loop containing nucleoside triphosphate hydrolase
LOC111370648	271.093	2.25865	4.78544	0.223154	10.1215	4.44e-24	4.63e-23	XP_022848234.1	uncharacterized_membrane_protein_At1g16860-like	Olive
LOC111370663	880.138	0.327946	1.25523	0.127363	2.5749	0.010027	0.0197054	XP_022848294.1	YTH_domain-containing_family_protein_1-like,_transcript_variant_X6	Olive	PF04146:YT521-B-like_domain	IPR003029:S1 domain//IPR012340:Nucleic acid-binding, OB-fold
LOC111370671	323.896	0.795492	1.73567	0.324631	2.45045	0.0142677	0.0271462	XP_022848265.1	heavy_metal-associated_isoprenylated_plant_protein_7-like,_transcript_variant_X3	Olive	PF00403:Heavy-metal-associated_domain
LOC111370678	442.029	1.69584	3.23967	0.179658	9.43931	3.75e-21	3.43e-20	XP_022848312.1	60S_ribosomal_protein_L37-1	Olive	PF01907:Ribosomal_protein_L37e
LOC111370687	241.981	1.07403	2.10531	0.195069	5.50592	3.67e-08	1.49e-07			Olive		IPR004709:Na+/H+ exchanger
LOC111370688	331.491	0.910047	1.87911	0.162267	5.60833	2.04e-08	8.52e-08	XP_022848288.1	U3_small_nucleolar_RNA-associated_protein_6_homolog,_transcript_variant_X2	Olive	PF08640:U3_small_nucleolar_RNA-associated_protein_6	IPR031157:Tr-type G domain, conserved site//IPR006297:Elongation factor 4//IPR038363:LepA, C-terminal domain superfamily//IPR035647:EF-G domain III/V-like//IPR000795:Transcription factor, GTP-binding domain//IPR035654:Elongation factor 4, domain IV//IPR009000:Translation protein, beta-barrel domain superfamily//IPR027417:P-loop containing nucleoside triphosphate hydrolase//IPR005225:Small GTP-bin…
LOC111370690	284.896	1.22157	2.332	0.263081	4.6433	3.43e-06	1.13e-05	XP_022848292.1	peroxisomal_membrane_protein_PMP22-like	Olive	PF04117:Mpv17_/_PMP22_family	IPR006689:Small GTPase superfamily, ARF/SAR type//IPR027417:P-loop containing nucleoside triphosphate hydrolase//IPR005225:Small GTP-binding protein domain
LOC111370698	120.068	0.914969	1.88553	0.250227	3.65655	0.000255635	0.000657133	XP_022848303.1	pentatricopeptide_repeat-containing_protein_At1g79490,_mitochondrial,_transcript_variant_X2	Olive	PF17177:Pentacotripeptide-repeat_region_of_PRORP//PF01535:PPR_repeat//PF13041:PPR_repeat_family	IPR004813:Oligopeptide transporter, OPT superfamily
LOC111370699	369.079	0.788445	1.72721	0.158593	4.97149	6.64e-07	2.38e-06	XP_022848304.1	inosine-5'-monophosphate_dehydrogenase_2-like	Olive	PF00478:IMP_dehydrogenase_/_GMP_reductase_domain	IPR013785:Aldolase-type TIM barrel//IPR017853:Glycoside hydrolase superfamily
LOC111370702	65.3916	1.44985	2.73181	0.340492	4.25811	2.06e-05	6.15e-05		uncharacterized_LOC111370702	Olive		IPR038595:LURP-one-related superfamily//IPR025659:Tubby-like, C-terminal
LOC111370707	404.745	1.78464	3.44534	0.183606	9.71999	2.48e-22	2.41e-21	XP_022848315.1	probable_LRR_receptor-like_serine/threonine-protein_kinase_At1g56140,_transcript_variant_X3	Olive	PF11721:Malectin_domain//PF13855:Leucine_rich_repeat//PF07714:Protein_tyrosine_kinase
LOC111370708	1981.22	1.63162	3.09861	0.220759	7.39097	1.46e-13	8.9e-13	XP_022848321.1	probable_LRR_receptor-like_serine/threonine-protein_kinase_At1g56140,_transcript_variant_X7	Olive	PF00069:Protein_kinase_domain//PF13855:Leucine_rich_repeat//PF11721:Malectin_domain
LOC111370710	307.445	0.424393	1.34201	0.175403	2.41953	0.0155406	0.0293028		uncharacterized_LOC111370710	Olive		IPR016123:Mog1/PsbP, alpha/beta/alpha sandwich
LOC111370715	280.657	0.688151	1.61122	0.170982	4.02471	5.7e-05	0.00016115	XP_022848323.1	uncharacterized_protein_At4g15545-like	Olive		IPR006594:LIS1 homology motif
LOC111370719	197.572	0.635558	1.55354	0.214336	2.96524	0.00302446	0.00653406			Olive		IPR003604:Matrin/U1-C-like, C2H2-type zinc finger//IPR036236:Zinc finger C2H2 superfamily
LOC111370723	225.176	1.02613	2.03655	0.195587	5.24643	1.55e-07	5.91e-07	XP_022848338.1	ribosome-binding_ATPase_YchF,_transcript_variant_X2	Olive	PF01926:50S_ribosome-binding_GTPase//PF06071:Protein_of_unknown_function_(DUF933)	IPR036396:Cytochrome P450 superfamily//IPR001128:Cytochrome P450//IPR017972:Cytochrome P450, conserved site//IPR002401:Cytochrome P450, E-class, group I
LOC111370737	1096.88	1.78467	3.44539	0.135745	13.1472	1.77e-39	3.17e-38	XP_022848358.1	trihelix_transcription_factor_PTL-like	Olive	PF13837:Myb/SANT-like_DNA-binding_domain
LOC111370739	270.957	0.685268	1.608	0.191209	3.58387	0.000338539	0.00085412	XP_022848360.1	uncharacterized_LOC111370739	Olive	PF06999:Sucrase/ferredoxin-like	IPR000916:Bet v I/Major latex protein//IPR023393:START-like domain superfamily
LOC111370745	66.5686	2.0486	4.13704	0.417941	4.90165	9.5e-07	3.34e-06	XP_022848371.1	E3_ubiquitin-protein_ligase_At1g63170-like,_transcript_variant_X2	Olive	PF13639:Ring_finger_domain	IPR018247:EF-Hand 1, calcium-binding site//IPR002048:EF-hand domain//IPR000719:Protein kinase domain//IPR017441:Protein kinase, ATP binding site//IPR011992:EF-hand domain pair//IPR008271:Serine/threonine-protein kinase, active site//IPR011009:Protein kinase-like domain superfamily
LOC111370750	544.446	0.605795	1.52182	0.137627	4.40172	1.07e-05	3.32e-05	XP_022848380.1	uncharacterized_LOC111370750	Olive		IPR000315:B-box-type zinc finger//IPR010402:CCT domain
LOC111370751	139.252	0.810933	1.75435	0.235448	3.44422	0.000572718	0.00139563	XP_022848381.1	uncharacterized_LOC111370751	Olive
LOC111370754	328.952	0.696359	1.62041	0.170199	4.09144	4.29e-05	0.000122964	XP_022848386.1	uncharacterized_LOC111370754	Olive		IPR000608:Ubiquitin-conjugating enzyme E2//IPR023313:Ubiquitin-conjugating enzyme, active site//IPR016135:Ubiquitin-conjugating enzyme/RWD-like
LOC111370755	562.777	0.820503	1.76602	0.166169	4.93776	7.9e-07	2.81e-06	XP_022848417.1	protein_disulfide_isomerase-like_1-6	Olive	PF13848:Thioredoxin-like_domain//PF00085:Thioredoxin
LOC111370762	57.7504	1.33358	2.52028	0.394863	3.37733	0.000731938	0.00175476		U3_snoRNP-associated_protein-like_YAOH	Olive
LOC111370763	301.959	2.43188	5.39597	0.234947	10.3508	4.15e-25	4.52e-24	XP_022848397.1	stem-specific_protein_TSJT1-like	Olive	PF12481:Aluminium_induced_protein	IPR013083:Zinc finger, RING/FYVE/PHD-type//IPR001841:Zinc finger, RING-type//IPR013144:CRA domain//IPR037683:Rmd5, degenerated RING (dRING) finger//IPR006595:CTLH, C-terminal LisH motif
LOC111370764	394.972	2.18608	4.55067	0.286848	7.62103	2.52e-14	1.62e-13	XP_022848398.1	uncharacterized_LOC111370764	Olive	PF06749:Protein_of_unknown_function_(DUF1218)	IPR003347:JmjC domain
LOC111370766	87.7751	1.99618	3.98942	0.42619	4.68378	2.82e-06	9.36e-06		uncharacterized_LOC111370766	Olive		IPR024709:Putative O-fucosyltransferase, plant
LOC111370777	186.566	0.703843	1.62884	0.231053	3.04624	0.00231724	0.00511627	XP_022848409.1	grpE_protein_homolog_2,_mitochondrial-like,_transcript_variant_X3	Olive	PF01025:GrpE	IPR013087:Zinc finger C2H2-type//IPR036236:Zinc finger C2H2 superfamily
LOC111370778	1453.73	2.04734	4.13343	0.135911	15.0638	2.8e-51	6.93e-50		65-kDa_microtubule-associated_protein_1-like	Olive		IPR003607:HD/PDEase domain
LOC111370797	439.066	0.577271	1.49202	0.145752	3.96064	7.48e-05	0.0002079		probable_beta-1,3-galactosyltransferase_2	Olive		IPR032675:Leucine-rich repeat domain superfamily
LOC111370800	100.686	0.71009	1.63591	0.277523	2.55868	0.0105072	0.0205422	XP_022848441.1	probable_tetraacyldisaccharide_4'-kinase,_mitochondrial,_transcript_variant_X4	Olive	PF02606:Tetraacyldisaccharide-1-P_4'-kinase	IPR036249:Thioredoxin-like superfamily
LOC111370802	336.297	1.34991	2.54896	0.174851	7.72032	1.16e-14	7.61e-14	XP_022848444.1	protein_RICE_SALT_SENSITIVE_3-like,_transcript_variant_X2	Olive	PF14215:bHLH-MYC_and_R2R3-MYB_transcription_factors_N-terminal	IPR010493:Serine acetyltransferase, N-terminal//IPR011004:Trimeric LpxA-like superfamily//IPR005881:Serine O-acetyltransferase//IPR042122:Serine acetyltransferase, N-terminal domain superfamily//IPR018357:Hexapeptide transferase, conserved site
LOC111370805	416.522	0.642954	1.56152	0.164877	3.8996	9.64e-05	0.000263422	XP_022848449.1	30S_ribosomal_protein_S20,_chloroplastic-like	Olive	PF01649:Ribosomal_protein_S20	IPR010167:Amino-acid N-acetyltransferase//IPR036393:Acetylglutamate kinase-like superfamily//IPR037528:Acetylglutamate kinase ArgB//IPR001057:Glutamate/acetylglutamate kinase//IPR004662:Acetylglutamate kinase family//IPR041727:N-Acetyl-L-glutamate kinase, cyclic
LOC111370819	388.921	1.48679	2.80264	0.182855	8.13094	4.26e-16	3.03e-15	XP_022848464.1	30S_ribosomal_protein_S6_alpha,_chloroplastic	Olive		IPR016024:Armadillo-type fold
LOC111370820	453.452	2.5958	6.04523	0.183615	14.1372	2.24e-45	4.81e-44	XP_022848466.1	transcription_factor_TCP4-like	Olive	PF03634:TCP_family_transcription_factor
LOC111370824	576.231	0.800902	1.74219	0.133815	5.98516	2.16e-09	9.84e-09	XP_022848479.1	multiple_organellar_RNA_editing_factor_8,_chloroplastic/mitochondrial-like	Olive
LOC111370830	169.128	1.20363	2.30318	0.225836	5.32966	9.84e-08	3.83e-07	XP_022848491.1	uroporphyrinogen_decarboxylase_1,_chloroplastic-like	Olive	PF01208:Uroporphyrinogen_decarboxylase_(URO-D)
LOC111370832	136.262	2.14419	4.42043	0.407408	5.263	1.42e-07	5.43e-07	XP_022848492.1	uncharacterized_LOC111370832	Olive		IPR035595:UDP-glycosyltransferase family, conserved site
LOC111370842	664.437	1.70507	3.26044	0.16304	10.458	1.35e-25	1.5e-24	XP_022848506.1	prohibitin-1,_mitochondrial,_transcript_variant_X3	Olive	PF01145:SPFH_domain_/_Band_7_family	IPR002885:Pentatricopeptide repeat//IPR011990:Tetratricopeptide-like helical domain superfamily
LOC111370849	1013.59	0.998718	1.99822	0.17081	5.84696	5.01e-09	2.21e-08	XP_022848513.1	26S_proteasome_non-ATPase_regulatory_subunit_2_homolog_A-like,_transcript_variant_X2	Olive	PF17781:RPN1/RPN2_N-terminal_domain//PF18051:26S_proteasome_non-ATPase_regulatory_subunit_RPN1_C-terminal//PF01851:Proteasome/cyclosome_repeat	IPR012946:X8 domain//IPR000490:Glycoside hydrolase family 17//IPR017853:Glycoside hydrolase superfamily
LOC111370852	1739.29	0.85284	1.80605	0.161952	5.26599	1.39e-07	5.35e-07	XP_022848518.1	probable_LRR_receptor-like_serine/threonine-protein_kinase_At1g53440,_transcript_variant_X3	Olive	PF11721:Malectin_domain//PF07714:Protein_tyrosine_kinase//PF13855:Leucine_rich_repeat	IPR036133:EB1, C-terminal domain superfamily//IPR004953:EB1, C-terminal//IPR042180:Intermediate filament, rod domain, coil 1B//IPR036872:CH domain superfamily//IPR001715:Calponin homology domain
LOC111370853	363.192	0.532154	1.44609	0.17907	2.97177	0.00296091	0.0064116	XP_022848519.1	uncharacterized_LOC111370853	Olive
LOC111370854	1238.82	1.65598	3.15137	0.15126	10.9479	6.8e-28	8.35e-27		uncharacterized_LOC111370854	Olive
LOC111370856	256.012	2.31035	4.96002	0.202634	11.4016	4.11e-30	5.44e-29	XP_022848520.1	50S_ribosomal_protein_L13,_chloroplastic-like	Olive	PF00572:Ribosomal_protein_L13	IPR036396:Cytochrome P450 superfamily//IPR001128:Cytochrome P450//IPR017972:Cytochrome P450, conserved site//IPR002401:Cytochrome P450, E-class, group I
LOC111370865	592.687	0.453433	1.36929	0.147177	3.08086	0.002064	0.00459425			Olive
LOC111370869	544.538	0.82399	1.7703	0.203798	4.04317	5.27e-05	0.000149608	XP_022848539.1	DNA-directed_RNA_polymerases_II,_IV_and_V_subunit_12	Olive	PF03604:DNA_directed_RNA_polymerase,_7_kDa_subunit	IPR016024:Armadillo-type fold//IPR020839:Stromalin conservative domain
LOC111370875	263.441	2.68149	6.41519	0.218757	12.2579	1.52e-34	2.35e-33	XP_022848544.1	9-cis-epoxycarotenoid_dioxygenase_NCED1,_chloroplastic-like	Olive	PF03055:Retinal_pigment_epithelial_membrane_protein	IPR013083:Zinc finger, RING/FYVE/PHD-type//IPR001841:Zinc finger, RING-type
LOC111370877	132.355	3.51568	11.4374	0.333015	10.5571	4.71e-26	5.34e-25	XP_022848547.1	uncharacterized_LOC111370877	Olive		IPR013083:Zinc finger, RING/FYVE/PHD-type//IPR011011:Zinc finger, FYVE/PHD-type//IPR001965:Zinc finger, PHD-type//IPR019786:Zinc finger, PHD-type, conserved site//IPR019787:Zinc finger, PHD-finger
LOC111370878	1273.02	3.49662	11.2873	0.146246	23.9092	2.46e-126	2.14e-124	XP_022848548.1	polyphenol_oxidase_I,_chloroplastic-like	Olive	PF12143:Protein_of_unknown_function_(DUF_B2219)//PF12142:Polyphenol_oxidase_middle_domain//PF00264:Common_central_domain_of_tyrosinase
LOC111370879	725.262	2.52952	5.77379	0.479947	5.27042	1.36e-07	5.22e-07	XP_022848549.1	polyphenol_oxidase_I,_chloroplastic-like	Olive	PF12143:Protein_of_unknown_function_(DUF_B2219)//PF00264:Common_central_domain_of_tyrosinase//PF12142:Polyphenol_oxidase_middle_domain
LOC111370881	313.777	1.14068	2.20484	0.215657	5.28931	1.23e-07	4.73e-07	XP_022848551.1	transcription_factor_GTE12-like	Olive	PF00439:Bromodomain	IPR036236:Zinc finger C2H2 superfamily//IPR013087:Zinc finger C2H2-type
LOC111370891	205.716	0.88786	1.85043	0.206853	4.29222	1.77e-05	5.32e-05		uncharacterized_LOC111370891	Olive
LOC111370901	277.813	0.779376	1.71639	0.191444	4.07104	4.68e-05	0.000133679	XP_022848565.1	uncharacterized_LOC111370901	Olive	PF03141:Putative_S-adenosyl-L-methionine-dependent_methyltransferase
LOC111370909	597.61	0.691239	1.61467	0.144885	4.77096	1.83e-06	6.26e-06	XP_022848578.1	glucose-6-phosphate_1-dehydrogenase,_chloroplastic-like	Olive	PF02781:Glucose-6-phosphate_dehydrogenase,_C-terminal_domain//PF00479:Glucose-6-phosphate_dehydrogenase,_NAD_binding_domain	IPR000719:Protein kinase domain//IPR017441:Protein kinase, ATP binding site//IPR011009:Protein kinase-like domain superfamily//IPR008271:Serine/threonine-protein kinase, active site
LOC111370918	2009.63	0.830499	1.7783	0.170997	4.85679	1.19e-06	4.15e-06	XP_022848589.1	isopentenyl-diphosphate_Delta-isomerase_I-like	Olive	PF00293:NUDIX_domain	IPR036893:SBP domain superfamily//IPR004333:SBP domain
LOC111370923	153.225	1.04831	2.0681	0.223632	4.68764	2.76e-06	9.2e-06	XP_022848597.1	3-oxoacyl-[acyl-carrier-protein]_synthase_I,_chloroplastic,_transcript_variant_X2	Olive	PF00109:Beta-ketoacyl_synthase,_N-terminal_domain//PF02801:Beta-ketoacyl_synthase,_C-terminal_domain
LOC111370927	531.068	1.16747	2.24617	0.169079	6.90487	5.03e-12	2.78e-11	XP_022848600.1	urease_accessory_protein_G	Olive	PF02492:CobW/HypB/UreG,_nucleotide-binding_domain
LOC111370931	2092.39	1.02933	2.04108	0.193503	5.31945	1.04e-07	4.04e-07	XP_022848605.1	60S_ribosomal_protein_L18a	Olive	PF01775:Ribosomal_proteins_50S-L18Ae/60S-L20/60S-L18A	IPR009060:UBA-like superfamily
LOC111370933	190.818	0.685027	1.60773	0.203545	3.36548	0.000764102	0.00182757	XP_022848608.1	ornithine_carbamoyltransferase,_chloroplastic-like	Olive	PF02729:Aspartate/ornithine_carbamoyltransferase,_carbamoyl-P_binding_domain//PF00185:Aspartate/ornithine_carbamoyltransferase,_Asp/Orn_binding_domain
LOC111370937	775.523	0.392672	1.31282	0.160931	2.44	0.0146871	0.0278449	XP_022848611.1	cullin-4-like	Olive	PF00888:Cullin_family//PF10557:Cullin_protein_neddylation_domain
LOC111370938	81.1309	1.30054	2.46321	0.320408	4.05901	4.93e-05	0.000140397	XP_022848612.1	protease_Do-like_5,_chloroplastic,_transcript_variant_X2	Olive	PF13365:Trypsin-like_peptidase_domain	IPR000182:GNAT domain//IPR016181:Acyl-CoA N-acyltransferase
LOC111370949	125.197	0.671847	1.59311	0.261051	2.57362	0.010064	0.0197653	XP_022848623.1	uncharacterized_LOC111370949,_transcript_variant_X5	Olive	PF02485:Core-2/I-Branching_enzyme	IPR026899:1,3-beta-glucan synthase subunit FKS1-like, domain-1
LOC111370957	65.2397	1.09829	2.141	0.350104	3.13704	0.00170664	0.00384795	XP_022848638.1	pentatricopeptide_repeat-containing_protein_At2g01860	Olive	PF13812:Pentatricopeptide_repeat_domain	IPR029063:S-adenosyl-L-methionine-dependent methyltransferase//IPR003358:tRNA (guanine-N-7) methyltransferase, Trmb type
LOC111370964	662.262	1.67172	3.18594	0.141621	11.8042	3.71e-32	5.32e-31	XP_022848658.1	F-box/kelch-repeat_protein_At3g06240-like,_transcript_variant_X2	Olive	PF00646:F-box_domain//PF08268:F-box_associated_domain
LOC111370982	118.993	1.47025	2.77069	0.273509	5.3755	7.64e-08	3.01e-07	XP_022848676.1	probable_amino_acid_permease_7	Olive	PF01490:Transmembrane_amino_acid_transporter_protein	IPR036961:Kinesin motor domain superfamily//IPR001752:Kinesin motor domain//IPR027417:P-loop containing nucleoside triphosphate hydrolase//IPR019821:Kinesin motor domain, conserved site
LOC111370986	158.504	0.49022	1.40466	0.219766	2.23064	0.0257047	0.0460267		protein_VACUOLELESS1	Olive
LOC111370994	180.738	0.528069	1.442	0.23265	2.2698	0.0232196	0.0420381	XP_022848694.1	protein_MEI2-like_2	Olive	PF04059:RNA_recognition_motif_2//PF00076:RNA_recognition_motif._(a.k.a._RRM,_RBD,_or_RNP_domain)	IPR001012:UBX domain//IPR029071:Ubiquitin-like domain superfamily//IPR009060:UBA-like superfamily
LOC111371003	135.463	2.68863	6.44701	0.284079	9.46439	2.95e-21	2.72e-20	XP_022848719.1	30S_ribosomal_protein_S17,_chloroplastic-like	Olive	PF00366:Ribosomal_protein_S17
LOC111371007	379.547	1.47899	2.78753	0.175758	8.41493	3.93e-17	2.97e-16		glucan_endo-1,3-beta-glucosidase_6-like	Olive
LOC111371038	1002.55	0.494655	1.40898	0.119848	4.12734	3.67e-05	0.000106226		chromatin_modification-related_protein_EAF1_A-like	Olive
LOC111371056	522.841	0.723431	1.6511	0.231343	3.12709	0.00176548	0.00397316	XP_022848742.1	BTB/POZ_and_MATH_domain-containing_protein_6-like	Olive	PF00917:MATH_domain	IPR035896:AN1-like Zinc finger//IPR002653:Zinc finger, A20-type//IPR000058:Zinc finger, AN1-type
LOC111371059	93.7568	0.609127	1.52534	0.273689	2.22561	0.02604	0.0465454	XP_022848745.1	BAG-associated_GRAM_protein_1-like	Olive	PF00168:C2_domain//PF16016:VAD1_Analog_of_StAR-related_lipid_transfer_domain	IPR008050:DNA replication licensing factor Mcm7//IPR012340:Nucleic acid-binding, OB-fold//IPR027417:P-loop containing nucleoside triphosphate hydrolase//IPR001208:MCM domain//IPR031327:Mini-chromosome maintenance protein//IPR018525:Mini-chromosome maintenance, conserved site
LOC111371088	624.693	0.621718	1.53871	0.132575	4.68954	2.74e-06	9.13e-06	XP_022848789.1	homeobox-leucine_zipper_protein_GLABRA_2	Olive	PF00046:Homeodomain//PF01852:START_domain	IPR001841:Zinc finger, RING-type//IPR013083:Zinc finger, RING/FYVE/PHD-type
LOC111371094	110.449	0.626066	1.54335	0.266037	2.3533	0.0186075	0.0344616	XP_022848774.1	uncharacterized_LOC111371094	Olive	PF16093:Proteasome_assembly_chaperone_4	IPR000555:JAB1/MPN/MOV34 metalloenzyme domain//IPR037518:MPN domain
LOC111371102	181.031	1.06081	2.0861	0.235126	4.51166	6.43e-06	2.05e-05	XP_022848781.1	uncharacterized_LOC111371102	Olive	PF02636:Putative_S-adenosyl-L-methionine-dependent_methyltransferase	IPR036291:NAD(P)-binding domain superfamily
LOC111371131	322.053	0.811939	1.75557	0.177508	4.57409	4.78e-06	1.55e-05	XP_022848807.1	CLIP-associated_protein-like	Olive	PF12348:CLASP_N_terminal
LOC111371139	1922.94	1.8332	3.56326	0.183195	10.0068	1.42e-23	1.46e-22		protein_NETWORKED_1D-like	Olive
LOC111371145	524.821	0.476028	1.39091	0.171994	2.76771	0.00564516	0.0116374	XP_022848821.1	AP-4_complex_subunit_mu-like	Olive	PF00928:Adaptor_complexes_medium_subunit_family//PF13456:Reverse_transcriptase-like	IPR036869:Chaperone J-domain superfamily//IPR001623:DnaJ domain
LOC111371151	312.406	0.650188	1.56937	0.192291	3.38127	0.000721527	0.00173128	XP_022848830.1	uncharacterized_LOC111371151	Olive	PF13456:Reverse_transcriptase-like
LOC111371166	57.7776	2.68737	6.44138	0.516964	5.19837	2.01e-07	7.58e-07	XP_022848841.1	kinesin-like_protein_KIN-4C	Olive	PF00225:Kinesin_motor_domain	IPR018083:Sterol reductase, conserved site
LOC111371172	280.179	0.909538	1.87844	0.181712	5.00538	5.58e-07	2.01e-06	XP_022848845.1	uncharacterized_LOC111371172	Olive	PF04061:ORMDL_family
LOC111371176	407.483	0.821232	1.76691	0.173242	4.74037	2.13e-06	7.23e-06	XP_022848849.1	heterogeneous_nuclear_ribonucleoprotein_1-like	Olive	PF00076:RNA_recognition_motif._(a.k.a._RRM,_RBD,_or_RNP_domain)	IPR002347:Short-chain dehydrogenase/reductase SDR//IPR036291:NAD(P)-binding domain superfamily
LOC111371183	480.077	1.53267	2.89321	0.153617	9.97721	1.92e-23	1.95e-22	XP_022848854.1	corytuberine_synthase-like	Olive	PF00067:Cytochrome_P450	IPR003661:Signal transduction histidine kinase, dimerisation/phosphoacceptor domain//IPR011006:CheY-like superfamily//IPR001789:Signal transduction response regulator, receiver domain//IPR036890:Histidine kinase/HSP90-like ATPase superfamily//IPR003594:Histidine kinase/HSP90-like ATPase//IPR004358:Signal transduction histidine kinase-related protein, C-terminal//IPR036097:Signal transduction hist…
LOC111371195	140.982	1.73926	3.33863	0.279275	6.22776	4.73e-10	2.26e-09	XP_022848864.1	uncharacterized_LOC111371195	Olive		IPR001810:F-box domain//IPR032675:Leucine-rich repeat domain superfamily//IPR006553:Leucine-rich repeat, cysteine-containing subtype//IPR036047:F-box-like domain superfamily
LOC111371198	84.4277	3.64875	12.5425	0.428409	8.51697	1.64e-17	1.26e-16	XP_022848866.1	uncharacterized_LOC111371198	Olive
LOC111371209	65.784	1.11098	2.15993	0.357621	3.10659	0.00189258	0.00423934	XP_022848873.1	arabinogalactan_peptide_14-like	Olive		IPR006509:Splicing factor, RBM39-like//IPR000504:RNA recognition motif domain//IPR012677:Nucleotide-binding alpha-beta plait domain superfamily//IPR003954:RNA recognition motif domain, eukaryote//IPR035979:RNA-binding domain superfamily
LOC111371239	218.019	0.667639	1.58847	0.194727	3.42859	0.000606721	0.00147336	XP_022849004.1	transcription_factor_bHLH68-like,_transcript_variant_X2	Olive		IPR000684:RNA polymerase II, heptapeptide repeat, eukaryotic//IPR006592:RNA polymerase, N-terminal//IPR038593:RNA polymerase Rpb1, domain 7 superfamily//IPR042102:RNA polymerase Rpb1, domain 3 superfamily//IPR038120:RNA polymerase Rpb1, funnel domain superfamily
LOC111371244	86.9714	0.708171	1.63373	0.292887	2.4179	0.0156104	0.029418	XP_022848903.1	uncharacterized_LOC111371244	Olive	PF08284:Retroviral_aspartyl_protease//PF03732:Retrotransposon_gag_protein//PF17921:Integrase_zinc_binding_domain//PF00078:Reverse_transcriptase_(RNA-dependent_DNA_polymerase)//PF00665:Integrase_core_domain	IPR002467:Peptidase M24A, methionine aminopeptidase, subfamily 1//IPR036005:Creatinase/aminopeptidase-like//IPR001714:Peptidase M24, methionine aminopeptidase
LOC111371246	93.5915	3.14749	8.86113	0.481229	6.54052	6.13e-11	3.15e-10	XP_022848901.1	disease_resistance_response_protein_206-like	Olive	PF03018:Dirigent-like_protein	IPR032675:Leucine-rich repeat domain superfamily//IPR001810:F-box domain//IPR006553:Leucine-rich repeat, cysteine-containing subtype
LOC111371253	135.456	1.23726	2.35751	0.289264	4.27728	1.89e-05	5.67e-05	XP_022848908.1	laccase-12-like	Olive	PF00394:Multicopper_oxidase//PF07732:Multicopper_oxidase//PF07731:Multicopper_oxidase
LOC111371266	575.262	0.578081	1.49286	0.138428	4.17604	2.97e-05	8.68e-05	XP_022848925.1	protein_NUCLEAR_FUSION_DEFECTIVE_4-like	Olive	PF06813:Nodulin-like
LOC111371267	166.246	0.808438	1.75131	0.21615	3.74018	0.000183892	0.000482936	XP_022848928.1	pentatricopeptide_repeat-containing_protein_At4g14850,_transcript_variant_X3	Olive	PF01535:PPR_repeat//PF14432:DYW_family_of_nucleic_acid_deaminases	IPR001313:Pumilio RNA-binding repeat//IPR033712:Pumilio, RNA binding domain//IPR033133:Pumilio homology domain//IPR011989:Armadillo-like helical//IPR016024:Armadillo-type fold
LOC111371269	310.568	2.25592	4.7764	0.240008	9.39939	5.49e-21	4.97e-20	XP_022848931.1	formin-like_protein_1	Olive	PF02181:Formin_Homology_2_Domain	IPR024792:Rho GDP-dissociation inhibitor domain superfamily//IPR014756:Immunoglobulin E-set
LOC111371273	2593.04	0.663179	1.58357	0.150292	4.4126	1.02e-05	3.17e-05	XP_022848937.1	photosystem_I_reaction_center_subunit_XI,_chloroplastic-like	Olive	PF02605:Photosystem_I_reaction_centre_subunit_XI
LOC111371275	74.6852	0.86661	1.82337	0.324283	2.67239	0.00753136	0.0151608	XP_022848939.1	glutamate_receptor_1.2-like	Olive	PF00497:Bacterial_extracellular_solute-binding_proteins,_family_3//PF01094:Receptor_family_ligand_binding_region//PF00060:Ligand-gated_ion_channel	IPR037212:Mediator complex, subunit Med7/Med21-like
LOC111371282	533.089	2.36701	5.15872	0.162604	14.5569	5.28e-48	1.22e-46	XP_022848948.1	monocopper_oxidase-like_protein_SKU5,_transcript_variant_X2	Olive	PF07731:Multicopper_oxidase//PF00394:Multicopper_oxidase//PF07732:Multicopper_oxidase	IPR036188:FAD/NAD(P)-binding domain superfamily
LOC111371285	171.81	0.716991	1.64375	0.303507	2.36235	0.0181594	0.0337115	XP_022848952.1	protein_PEP-RELATED_DEVELOPMENT_ARRESTED_1,_chloroplastic	Olive
LOC111371288	525.557	3.4353	10.8175	0.178657	19.2284	2.14e-82	9.97e-81	XP_022848955.1	putative_lipid-transfer_protein_DIR1	Olive	PF14368:Probable_lipid_transfer	IPR027417:P-loop containing nucleoside triphosphate hydrolase
LOC111371289	182.481	1.31651	2.49063	0.252347	5.21707	1.82e-07	6.89e-07	XP_022848956.1	U-box_domain-containing_protein_9	Olive	PF04564:U-box_domain//PF00514:Armadillo/beta-catenin-like_repeat	IPR036259:MFS transporter superfamily
LOC111371291	1116.12	0.891058	1.85454	0.167859	5.30837	1.11e-07	4.28e-07	XP_022848958.1	60S_ribosomal_protein_L32-1	Olive	PF01655:Ribosomal_protein_L32
LOC111371292	225.255	0.738037	1.6679	0.246995	2.98806	0.00280755	0.00610504	XP_022848959.1	ras-related_protein_RABA5b-like	Olive	PF00071:Ras_family	IPR008972:Cupredoxin//IPR003245:Phytocyanin domain
LOC111371295	80.3097	2.23931	4.72172	0.335636	6.67186	2.53e-11	1.33e-10	XP_022848962.1	uncharacterized_LOC111371295	Olive
LOC111371296	435.42	2.30828	4.95293	0.167972	13.7421	5.68e-43	1.14e-41	XP_022848964.1	transcription_factor_bHLH62-like,_transcript_variant_X2	Olive	PF00010:Helix-loop-helix_DNA-binding_domain	IPR005829:Sugar transporter, conserved site//IPR003663:Sugar/inositol transporter//IPR020846:Major facilitator superfamily domain//IPR036259:MFS transporter superfamily
LOC111371298	2102.44	0.462366	1.3778	0.14678	3.15007	0.00163231	0.00369422	XP_022848969.1	peptidyl-prolyl_cis-trans_isomerase_FKBP62-like	Olive	PF00515:Tetratricopeptide_repeat//PF00254:FKBP-type_peptidyl-prolyl_cis-trans_isomerase	IPR000008:C2 domain//IPR035892:C2 domain superfamily
LOC111371311	167.967	0.748292	1.6798	0.246797	3.03202	0.00242922	0.00534213		uncharacterized_LOC111371311,_transcript_variant_X2	Olive		IPR009057:Homeobox-like domain superfamily//IPR006447:Myb domain, plants//IPR017930:Myb domain
LOC111371312	250.712	2.01995	4.05571	0.20266	9.96718	2.12e-23	2.16e-22	XP_022848988.1	transcription_factor_TCP14-like	Olive	PF03634:TCP_family_transcription_factor
LOC111371313	113.836	1.63843	3.11326	0.26839	6.10465	1.03e-09	4.81e-09	XP_022848990.1	uncharacterized_LOC111371313,_transcript_variant_X2	Olive		IPR002912:ACT domain
LOC111371316	417.934	0.571532	1.4861	0.14662	3.89804	9.7e-05	0.000265084	XP_022848995.1	uncharacterized_LOC111371316,_transcript_variant_X2	Olive		IPR027417:P-loop containing nucleoside triphosphate hydrolase
LOC111371323	219.301	2.94367	7.69367	0.236708	12.4359	1.67e-35	2.65e-34	XP_022849009.1	uncharacterized_LOC111371323,_transcript_variant_X5	Olive	PF14309:Domain_of_unknown_function_(DUF4378)//PF14383:DUF761-associated_sequence_motif
LOC111371325	207.558	0.49034	1.40478	0.223137	2.19748	0.0279862	0.04966	XP_022849012.1	putative_pentatricopeptide_repeat-containing_protein_At3g16890,_mitochondrial,_transcript_variant_X3	Olive	PF13041:PPR_repeat_family//PF12854:PPR_repeat//PF01535:PPR_repeat	IPR032675:Leucine-rich repeat domain superfamily//IPR027417:P-loop containing nucleoside triphosphate hydrolase//IPR038005:Virus X resistance protein-like, coiled-coil domain
LOC111371329	177.823	1.42711	2.68908	0.226295	6.30642	2.86e-10	1.39e-09	XP_022849017.1	dihydrolipoyl_dehydrogenase_1,_chloroplastic-like,_transcript_variant_X2	Olive	PF02852:Pyridine_nucleotide-disulphide_oxidoreductase,_dimerisation_domain//PF07992:Pyridine_nucleotide-disulphide_oxidoreductase
LOC111371344	93.9374	1.03324	2.04662	0.308906	3.34485	0.000823264	0.00196057	XP_022849036.1	uncharacterized_LOC111371344	Olive	PF09335:SNARE_associated_Golgi_protein	IPR036259:MFS transporter superfamily
LOC111371345	192.305	1.89469	3.71843	0.222758	8.50563	1.81e-17	1.39e-16	XP_022849037.1	BTB/POZ_domain-containing_protein_At5g48800	Olive	PF03000:NPH3_family//PF00651:BTB/POZ_domain	IPR015946:K homology domain-like, alpha/beta//IPR000238:Ribosome-binding factor A//IPR023799:Ribosome-binding factor A domain superfamily//IPR020053:Ribosome-binding factor A, conserved site
LOC111371346	868.929	2.27744	4.84818	0.169291	13.4528	2.96e-41	5.62e-40	XP_022849038.1	cytochrome_b5-like	Olive	PF00173:Cytochrome_b5-like_Heme/Steroid_binding_domain	IPR013032:EGF-like, conserved site//IPR008271:Serine/threonine-protein kinase, active site//IPR017441:Protein kinase, ATP binding site//IPR000719:Protein kinase domain//IPR011009:Protein kinase-like domain superfamily
LOC111371352	692.086	1.665	3.17113	0.651266	2.55656	0.0105713	0.0206544		uncharacterized_LOC111371352,_transcript_variant_X2	Olive		IPR036393:Acetylglutamate kinase-like superfamily//IPR015963:Uridylate kinase, bacteria
LOC111371354	99.0694	3.46264	11.0245	0.397712	8.70641	3.14e-18	2.49e-17	XP_022849059.1	transposon_Ty3-G_Gag-Pol_polyprotein	Olive	PF17921:Integrase_zinc_binding_domain//PF00665:Integrase_core_domain//PF00078:Reverse_transcriptase_(RNA-dependent_DNA_polymerase)//PF17917:RNase_H-like_domain_found_in_reverse_transcriptase//PF17919:RNase_H-like_domain_found_in_reverse_transcriptase	IPR027417:P-loop containing nucleoside triphosphate hydrolase//IPR005225:Small GTP-binding protein domain
LOC111371357	54.4846	2.30749	4.95021	0.452262	5.10211	3.36e-07	1.24e-06	XP_022849064.1	DNA_repair_protein_RAD51_homolog_2,_transcript_variant_X3	Olive	PF08423:Rad51	IPR006368:GDP-mannose 4,6-dehydratase//IPR036291:NAD(P)-binding domain superfamily
LOC111371360	198.388	0.543942	1.45795	0.234584	2.31875	0.0204084	0.0374833	XP_022849068.1	BTB/POZ_domain-containing_protein_At5g60050,_transcript_variant_X2	Olive		IPR011989:Armadillo-like helical//IPR034085:TOG domain//IPR016024:Armadillo-type fold
LOC111371363	312.968	1.40387	2.6461	0.18912	7.42314	1.14e-13	7.03e-13	XP_022849071.1	kinesin-like_protein_KIN-5D,_transcript_variant_X2	Olive	PF00225:Kinesin_motor_domain	IPR011016:Zinc finger, RING-CH-type//IPR013083:Zinc finger, RING/FYVE/PHD-type
LOC111371364	78.8887	0.918024	1.88953	0.309396	2.96715	0.00300572	0.00649899		uncharacterized_LOC111371364	Olive
LOC111371369	139.022	1.81494	3.51844	0.264777	6.85459	7.15e-12	3.91e-11	XP_022849077.1	pentatricopeptide_repeat-containing_protein_At1g07740,_mitochondrial	Olive	PF01535:PPR_repeat//PF13041:PPR_repeat_family	IPR029063:S-adenosyl-L-methionine-dependent methyltransferase
LOC111371377	71.3132	1.19135	2.28366	0.328665	3.62481	0.000289171	0.000737981	XP_022849086.1	protein_ALP1-like,_transcript_variant_X3	Olive	PF13359:DDE_superfamily_endonuclease
LOC111371379	1186.7	2.37899	5.20173	0.170527	13.9508	3.11e-44	6.44e-43	XP_022849089.1	histone_H2A-like	Olive	PF00125:Core_histone_H2A/H2B/H3/H4//PF16211:C-terminus_of_histone_H2A	IPR007650:Zf-FLZ domain
LOC111371386	203.829	0.680244	1.60241	0.279047	2.43774	0.0147796	0.0279856	XP_022849099.1	probable_plastid-lipid-associated_protein_12,_chloroplastic,_transcript_variant_X3	Olive	PF04755:PAP_fibrillin
LOC111371394	3148.22	2.35002	5.09833	0.146842	16.0038	1.2e-57	3.5e-56	XP_022849120.1	uncharacterized_LOC111371394	Olive	PF03080:Neprosin//PF14365:Neprosin_activation_peptide	IPR001841:Zinc finger, RING-type//IPR017907:Zinc finger, RING-type, conserved site//IPR013083:Zinc finger, RING/FYVE/PHD-type
LOC111371396	87.9362	1.66913	3.18023	0.317287	5.26063	1.44e-07	5.49e-07	XP_022849128.1	lysine--tRNA_ligase,_chloroplastic/mitochondrial-like,_transcript_variant_X4	Olive	PF00152:tRNA_synthetases_class_II_(D,_K_and_N)	IPR036390:Winged helix DNA-binding domain superfamily//IPR036388:Winged helix-like DNA-binding domain superfamily//IPR003316:E2F/DP family, winged-helix DNA-binding domain
LOC111371398	79.9612	3.13512	8.78546	0.387996	8.08028	6.46e-16	4.55e-15	XP_022849130.1	uncharacterized_LOC111371398,_transcript_variant_X2	Olive
LOC111371402	619.724	0.924673	1.89825	0.162105	5.70416	1.17e-08	4.99e-08	XP_022849138.1	peroxisomal_nicotinamide_adenine_dinucleotide_carrier-like,_transcript_variant_X6	Olive	PF00153:Mitochondrial_carrier_protein	IPR017441:Protein kinase, ATP binding site//IPR000719:Protein kinase domain//IPR011009:Protein kinase-like domain superfamily//IPR001220:Legume lectin domain//IPR008271:Serine/threonine-protein kinase, active site//IPR013320:Concanavalin A-like lectin/glucanase domain superfamily
LOC111371403	176.195	0.852902	1.80613	0.22714	3.75496	0.000173366	0.000456827	XP_022849139.1	alpha-ketoglutarate-dependent_dioxygenase_alkB_homolog_6	Olive	PF13532:2OG-Fe(II)_oxygenase_superfamily
LOC111371408	58.9343	0.778779	1.71568	0.353693	2.20185	0.0276759	0.0491593	XP_022849149.1	uncharacterized_LOC111371408	Olive	PF00917:MATH_domain
LOC111371415	325.546	0.522274	1.43622	0.233786	2.23399	0.025484	0.0456778	XP_022849165.1	selenoprotein_F-like	Olive	PF08806:Sep15/SelM_redox_domain	IPR003340:B3 DNA binding domain//IPR015300:DNA-binding pseudobarrel domain superfamily//IPR000270:PB1 domain
LOC111371417	166.286	1.22742	2.34149	0.302952	4.05155	5.09e-05	0.000144581	XP_022849170.1	uncharacterized_LOC111371417	Olive
LOC111371423	520.473	0.587424	1.50256	0.197363	2.97636	0.00291694	0.00632248	XP_022849176.1	geranylgeranyl_transferase_type-2_subunit_beta_1	Olive	PF00432:Prenyltransferase_and_squalene_oxidase_repeat
LOC111371425	636.431	0.570389	1.48492	0.128621	4.43465	9.22e-06	2.88e-05	XP_022849180.1	U5_small_nuclear_ribonucleoprotein_40_kDa_protein-like,_transcript_variant_X3	Olive	PF00400:WD_domain,_G-beta_repeat	IPR000182:GNAT domain//IPR016181:Acyl-CoA N-acyltransferase
LOC111371426	313.5	0.543164	1.45716	0.215803	2.51695	0.0118376	0.0229195	XP_022849181.1	cysteine_synthase,_chloroplastic/chromoplastic-like	Olive	PF00291:Pyridoxal-phosphate_dependent_enzyme
LOC111371429	185.677	1.57111	2.97133	0.220886	7.11276	1.14e-12	6.57e-12	XP_022849182.1	60S_ribosomal_protein_L5	Olive	PF17144:Ribosomal_large_subunit_proteins_60S_L5,_and_50S_L18//PF14204:Ribosomal_L18_C-terminal_region	IPR023213:Chloramphenicol acetyltransferase-like domain superfamily
LOC111371430	413.696	0.335235	1.26158	0.148944	2.25074	0.0244019	0.0439561	XP_022849183.1	acyl-coenzyme_A_thioesterase_9,_mitochondrial-like	Olive	PF03061:Thioesterase_superfamily	IPR002347:Short-chain dehydrogenase/reductase SDR//IPR036291:NAD(P)-binding domain superfamily
LOC111371438	646.23	0.785064	1.72317	0.135212	5.80617	6.39e-09	2.79e-08	XP_022849195.1	aminoacyl_tRNA_synthase_complex-interacting_multifunctional_protein_1	Olive	PF01588:Putative_tRNA_binding_domain
LOC111371439	212.267	0.639396	1.55768	0.203594	3.14054	0.00168637	0.00380607	XP_022849197.1	queuine_tRNA-ribosyltransferase_accessory_subunit_2-like,_transcript_variant_X2	Olive	PF01702:Queuine_tRNA-ribosyltransferase	IPR023175:Vacuolar protein sorting-associate protein Vta1/Callose synthase, N-terminal//IPR026899:1,3-beta-glucan synthase subunit FKS1-like, domain-1
LOC111371443	375.667	1.05965	2.08443	0.17115	6.19134	5.97e-10	2.83e-09	XP_022849205.1	chloride_channel_protein_CLC-e,_transcript_variant_X3	Olive	PF00654:Voltage_gated_chloride_channel//PF00571:CBS_domain	IPR036869:Chaperone J-domain superfamily//IPR018253:DnaJ domain, conserved site//IPR001623:DnaJ domain
LOC111371453	1592.92	2.03921	4.11019	0.158077	12.9001	4.49e-38	7.7e-37	XP_022849218.1	glutamine_synthetase_leaf_isozyme,_chloroplastic	Olive	PF00120:Glutamine_synthetase,_catalytic_domain//PF03951:Glutamine_synthetase,_beta-Grasp_domain	IPR020818:GroES chaperonin family//IPR011032:GroES-like superfamily//IPR018369:Chaperonin GroES, conserved site//IPR037124:GroES chaperonin superfamily
LOC111371460	368.966	0.722014	1.64948	0.300586	2.40202	0.0163047	0.0306077	XP_022849231.1	probable_serine/threonine-protein_phosphatase_2A_regulatory_subunit_B''_subunit_TON2	Olive		IPR011333:SKP1/BTB/POZ domain superfamily
LOC111371466	308.189	1.34035	2.53212	0.175636	7.63137	2.32e-14	1.5e-13	XP_022849239.1	divinyl_chlorophyllide_a_8-vinyl-reductase,_chloroplastic	Olive	PF13460:NAD(P)H-binding
LOC111371469	522.808	0.650806	1.57005	0.166035	3.91971	8.87e-05	0.000243916	XP_022849245.1	probable_serine/threonine-protein_kinase_At1g54610,_transcript_variant_X2	Olive	PF00069:Protein_kinase_domain
LOC111371473	352.151	0.597608	1.51321	0.175244	3.41014	0.000649292	0.00156994	XP_022849258.1	vesicle-associated_protein_2-2,_transcript_variant_X4	Olive	PF00635:MSP_(Major_sperm_protein)_domain	IPR002048:EF-hand domain//IPR018247:EF-Hand 1, calcium-binding site//IPR011992:EF-hand domain pair
LOC111371475	405.16	1.26834	2.40885	0.158976	7.9782	1.48e-15	1.02e-14	XP_022849263.1	uncharacterized_LOC111371475,_transcript_variant_X4	Olive	PF12906:RING-variant_domain
LOC111371485	103.561	2.27022	4.82396	0.298205	7.61295	2.68e-14	1.72e-13	XP_022849272.1	uncharacterized_LOC111371485	Olive
LOC111371493	153.685	2.87815	7.35205	0.273193	10.5352	5.94e-26	6.7e-25	XP_022849289.1	uncharacterized_LOC111371493	Olive		IPR035595:UDP-glycosyltransferase family, conserved site
LOC111371502	249.752	1.10104	2.1451	0.18259	6.03013	1.64e-09	7.52e-09	XP_022849299.1	probable_histone-arginine_methyltransferase_1.3,_transcript_variant_X4	Olive	PF06325:Ribosomal_protein_L11_methyltransferase_(PrmA)
LOC111371505	323.917	0.631515	1.54919	0.162224	3.89285	9.91e-05	0.000270402	XP_022849302.1	60S_ribosome_subunit_biogenesis_protein_NIP7_homolog	Olive	PF17833:UPF0113_Pre-PUA_domain//PF03657:UPF0113_PUA_domain
LOC111371512	453.923	0.74025	1.67047	0.156787	4.72137	2.34e-06	7.89e-06	XP_022849313.1	GATA_transcription_factor_16-like,_transcript_variant_X2	Olive	PF00320:GATA_zinc_finger	IPR036378:FAS1 domain superfamily//IPR000782:FAS1 domain
LOC111371519	184.293	1.28935	2.44418	0.302722	4.25918	2.05e-05	6.12e-05	XP_022849324.1	DNA-directed_RNA_polymerases_II,_IV_and_V_subunit_9A	Olive	PF02150:RNA_polymerases_M/15_Kd_subunit//PF01096:Transcription_factor_S-II_(TFIIS)	IPR008979:Galactose-binding-like domain superfamily
LOC111371539	671.264	0.715513	1.64207	0.14732	4.85685	1.19e-06	4.15e-06	XP_022849350.1	30S_ribosomal_protein_S1	Olive	PF00575:S1_RNA_binding_domain	IPR034751:Yippee domain
LOC111371547	53.3287	0.831792	1.77989	0.361217	2.30275	0.0212929	0.0389567	XP_022849366.1	solute_carrier_family_25_member_44-like,_transcript_variant_X2	Olive	PF00153:Mitochondrial_carrier_protein	IPR022357:Major intrinsic protein, conserved site//IPR000425:Major intrinsic protein//IPR023271:Aquaporin-like
LOC111371548	103.573	2.21934	4.65679	0.329049	6.7447	1.53e-11	8.2e-11	XP_022849367.1	uncharacterized_LOC111371548	Olive	PF13947:Wall-associated_receptor_kinase_galacturonan-binding//PF14380:Wall-associated_receptor_kinase_C-terminal
LOC111371557	201.696	1.40473	2.64768	0.256102	5.48502	4.13e-08	1.67e-07	XP_022849381.1	tRNA_pseudouridine_synthase_A_1	Olive	PF01416:tRNA_pseudouridine_synthase	IPR019786:Zinc finger, PHD-type, conserved site//IPR013083:Zinc finger, RING/FYVE/PHD-type//IPR001965:Zinc finger, PHD-type//IPR001214:SET domain//IPR011011:Zinc finger, FYVE/PHD-type//IPR019787:Zinc finger, PHD-finger
LOC111371564	504.066	2.32987	5.02761	0.163717	14.2311	5.87e-46	1.28e-44		uncharacterized_LOC111371564	Olive		IPR000644:CBS domain
LOC111371565	704.929	1.06631	2.09407	0.151187	7.05293	1.75e-12	1e-11	XP_022849387.1	beta-glucosidase-like_SFR2,_chloroplastic,_transcript_variant_X2	Olive	PF00232:Glycosyl_hydrolase_family_1	IPR011990:Tetratricopeptide-like helical domain superfamily//IPR019734:Tetratricopeptide repeat//IPR013026:Tetratricopeptide repeat-containing domain
LOC111371568	119.879	0.879858	1.84019	0.262592	3.35066	0.000806195	0.00192237	XP_022849398.1	uncharacterized_LOC111371568	Olive		IPR002912:ACT domain
LOC111371572	1287.97	0.609707	1.52595	0.111388	5.47375	4.41e-08	1.78e-07	XP_022849401.1	nucleolin-like	Olive		IPR013785:Aldolase-type TIM barrel//IPR002480:DAHP synthetase, class II
LOC111371575	165.143	1.31522	2.48841	0.332379	3.95699	7.59e-05	0.000210821	XP_022849405.1	protein_PHR1-LIKE_3-like,_transcript_variant_X3	Olive	PF00249:Myb-like_DNA-binding_domain//PF14379:MYB-CC_type_transfactor,_LHEQLE_motif	IPR032675:Leucine-rich repeat domain superfamily//IPR001810:F-box domain//IPR036047:F-box-like domain superfamily
LOC111371588	132.749	1.03719	2.05223	0.238553	4.34784	1.37e-05	4.2e-05	XP_022849417.1	7-hydroxymethyl_chlorophyll_a_reductase,_chloroplastic,_transcript_variant_X2	Olive	PF04422:Coenzyme_F420_hydrogenase/dehydrogenase,_beta_subunit_N-term//PF04432:Coenzyme_F420_hydrogenase/dehydrogenase,_beta_subunit_C_terminus	IPR017970:Homeobox, conserved site//IPR009057:Homeobox-like domain superfamily//IPR001356:Homeobox domain//IPR000047:Helix-turn-helix motif
LOC111371590	195.654	2.17929	4.52929	0.237942	9.1589	5.24e-20	4.55e-19	XP_022849422.1	KIN14B-interacting_protein_At4g14310-like,_transcript_variant_X2	Olive
LOC111371591	257.33	2.69271	6.46529	0.250588	10.7456	6.22e-27	7.29e-26			Olive		IPR036638:Helix-loop-helix DNA-binding domain superfamily//IPR011598:Myc-type, basic helix-loop-helix (bHLH) domain
LOC111371592	472.603	1.43147	2.69721	0.149227	9.59257	8.59e-22	8.12e-21	XP_022849426.1	COP1-interacting_protein_7-like,_transcript_variant_X4	Olive		IPR027417:P-loop containing nucleoside triphosphate hydrolase//IPR017665:Guanylate kinase//IPR008144:Guanylate kinase-like domain//IPR008145:Guanylate kinase/L-type calcium channel beta subunit//IPR020590:Guanylate kinase, conserved site
LOC111371593	71.3177	1.17139	2.25229	0.390558	2.99928	0.00270617	0.00590255	XP_022849427.1	putative_pentatricopeptide_repeat-containing_protein_At3g23330	Olive	PF14432:DYW_family_of_nucleic_acid_deaminases//PF01535:PPR_repeat//PF13041:PPR_repeat_family
LOC111371596	86.0214	2.00499	4.01387	0.401812	4.98988	6.04e-07	2.17e-06	XP_022849431.1	inorganic_phosphate_transporter_1-4-like,_transcript_variant_X2	Olive	PF00083:Sugar_(and_other)_transporter
LOC111371600	586.393	1.71323	3.27894	0.159893	10.7148	8.67e-27	1.01e-25	XP_022849435.1	protein_tas	Olive	PF00248:Aldo/keto_reductase_family	IPR029006:ADF-H/Gelsolin-like domain superfamily//IPR036175:Sec23/Sec24 helical domain superfamily//IPR036180:Gelsolin-like domain superfamily
LOC111371603	329.347	1.13131	2.19057	0.172542	6.55671	5.5e-11	2.83e-10	XP_022849438.1	E3_ubiquitin-protein_ligase_BRE1A-like	Olive
LOC111371606	53.7587	1.07317	2.10406	0.44474	2.41304	0.0158202	0.0297667		uncharacterized_LOC111371606	Olive
LOC111371609	923.095	1.07806	2.11119	0.144783	7.44604	9.62e-14	5.94e-13	XP_022849442.1	60S_ribosomal_protein_L23	Olive	PF00238:Ribosomal_protein_L14p/L23e	IPR029021:Protein-tyrosine phosphatase-like//IPR020422:Dual specificity protein phosphatase domain//IPR000387:Tyrosine specific protein phosphatases domain//IPR016130:Protein-tyrosine phosphatase, active site//IPR029006:ADF-H/Gelsolin-like domain superfamily
LOC111371621	143.987	2.45733	5.49201	0.265482	9.25611	2.12e-20	1.87e-19	XP_022849456.1	ribokinase	Olive	PF00294:pfkB_family_carbohydrate_kinase	IPR008656:Inositol-tetrakisphosphate 1-kinase
LOC111371625	620.225	0.898121	1.86364	0.156619	5.73442	9.78e-09	4.2e-08	XP_022849466.1	uncharacterized_LOC111371625,_transcript_variant_X5	Olive	PF14309:Domain_of_unknown_function_(DUF4378)//PF14383:DUF761-associated_sequence_motif//PF12552:Protein_of_unknown_function_(DUF3741)	IPR018230:BUD31/G10-related, conserved site//IPR001748:G10 protein
LOC111371630	340.729	0.739349	1.66942	0.185678	3.98189	6.84e-05	0.000191007	XP_022849475.1	uncharacterized_LOC111371630,_transcript_variant_X3	Olive		IPR018255:Ribosomal protein L10e, conserved site//IPR001197:Ribosomal protein L10e//IPR036920:Ribosomal protein L10e/L16 superfamily//IPR016180:Ribosomal protein L10e/L16
LOC111371637	224.996	1.27723	2.42373	0.215741	5.92017	3.22e-09	1.44e-08	XP_022849523.1	kinase-interacting_family_protein-like	Olive	PF07765:KIP1-like_protein	IPR011990:Tetratricopeptide-like helical domain superfamily
LOC111371640	3217.59	0.393313	1.31341	0.109043	3.60694	0.000309825	0.000787702	XP_022849492.1	root_phototropism_protein_2,_transcript_variant_X2	Olive	PF03000:NPH3_family//PF00651:BTB/POZ_domain	IPR018247:EF-Hand 1, calcium-binding site//IPR002048:EF-hand domain//IPR011992:EF-hand domain pair
LOC111371641	347.311	0.546447	1.46048	0.206507	2.64614	0.00814163	0.0162886	XP_022849497.1	probable_LRR_receptor-like_serine/threonine-protein_kinase_At1g06840,_transcript_variant_X4	Olive	PF13855:Leucine_rich_repeat//PF08263:Leucine_rich_repeat_N-terminal_domain//PF00069:Protein_kinase_domain	IPR002653:Zinc finger, A20-type//IPR035896:AN1-like Zinc finger//IPR000058:Zinc finger, AN1-type
LOC111371645	102.776	2.28246	4.86508	0.307298	7.42752	1.11e-13	6.8e-13	XP_022849502.1	protein_IQ-DOMAIN_14	Olive	PF13178:Protein_of_unknown_function_(DUF4005)//PF00612:IQ_calmodulin-binding_motif
LOC111371647	109.609	1.65839	3.15665	0.287518	5.76796	8.02e-09	3.47e-08	XP_022849506.1	protein_XRI1-like,_transcript_variant_X3	Olive		IPR011992:EF-hand domain pair//IPR002048:EF-hand domain//IPR018247:EF-Hand 1, calcium-binding site
LOC111371651	2164.72	1.25088	2.37986	0.230387	5.42947	5.65e-08	2.26e-07	XP_022849511.1	homocysteine_S-methyltransferase_2-like,_transcript_variant_X2	Olive	PF02574:Homocysteine_S-methyltransferase
LOC111371653	275.395	1.08691	2.12419	0.223632	4.86026	1.17e-06	4.08e-06	XP_022849514.1	type_IV_inositol_polyphosphate_5-phosphatase_7-like,_transcript_variant_X2	Olive		IPR030378:Circularly permuted (CP)-type guanine nucleotide-binding (G) domain//IPR027417:P-loop containing nucleoside triphosphate hydrolase//IPR023179:GTP-binding protein, orthogonal bundle domain superfamily//IPR006073:GTP binding domain
LOC111371654	129.733	0.900908	1.86724	0.348337	2.58631	0.00970103	0.0191184		uncharacterized_LOC111371654,_transcript_variant_X2	Olive
LOC111371655	321.29	0.655844	1.57554	0.21872	2.99856	0.00271258	0.00591498	XP_022849515.1	proteasome_subunit_beta_type-2-A-like	Olive	PF00227:Proteasome_subunit
LOC111371662	901.817	0.633482	1.5513	0.118807	5.33203	9.71e-08	3.78e-07	XP_022849542.1	uncharacterized_LOC111371662,_transcript_variant_X2	Olive	PF13833:EF-hand_domain_pair//PF13499:EF-hand_domain_pair//PF13202:EF_hand
LOC111371668	628.595	0.480061	1.3948	0.12893	3.72344	0.000196529	0.000513796	XP_022849553.1	uncharacterized_LOC111371668	Olive		IPR019489:Clp ATPase, C-terminal//IPR001270:ClpA/B family//IPR028299:ClpA/B, conserved site 2//IPR027417:P-loop containing nucleoside triphosphate hydrolase//IPR003593:AAA+ ATPase domain//IPR036628:Clp, N-terminal domain superfamily//IPR018368:ClpA/B, conserved site 1
LOC111371669	953.874	0.600844	1.5166	0.121477	4.94614	7.57e-07	2.69e-06	XP_022849556.1	putative_G3BP-like_protein,_transcript_variant_X3	Olive	PF00076:RNA_recognition_motif._(a.k.a._RRM,_RBD,_or_RNP_domain)//PF02136:Nuclear_transport_factor_2_(NTF2)_domain
LOC111371670	456.758	0.559339	1.47359	0.23201	2.41084	0.015916	0.0299349	XP_022849557.1	31_kDa_ribonucleoprotein,_chloroplastic-like	Olive	PF00076:RNA_recognition_motif._(a.k.a._RRM,_RBD,_or_RNP_domain)	IPR008927:6-phosphogluconate dehydrogenase-like, C-terminal domain superfamily//IPR036291:NAD(P)-binding domain superfamily//IPR006183:6-phosphogluconate dehydrogenase//IPR006113:6-phosphogluconate dehydrogenase, decarboxylating//IPR013328:6-phosphogluconate dehydrogenase, domain 2//IPR006114:6-phosphogluconate dehydrogenase, C-terminal
LOC111371676	1075.04	1.56889	2.96677	0.174922	8.96911	2.99e-19	2.5e-18	XP_022849569.1	major_allergen_Pru_ar_1-like	Olive	PF00407:Pathogenesis-related_protein_Bet_v_I_family
LOC111371677	145.346	0.826406	1.77326	0.22956	3.59996	0.000318269	0.000807157	XP_022849570.1	mitochondrial_import_receptor_subunit_TOM9-2	Olive	PF04281:Mitochondrial_import_receptor_subunit_Tom22	IPR017853:Glycoside hydrolase superfamily//IPR001360:Glycoside hydrolase family 1
LOC111371679	355.117	0.95233	1.93499	0.159589	5.9674	2.41e-09	1.09e-08	XP_022849571.1	cysteine-rich_repeat_secretory_protein_3-like	Olive	PF01657:Salt_stress_response/antifungal
LOC111371680	431.725	0.614588	1.53112	0.275777	2.22857	0.0258426	0.0462391	XP_022849572.1	pre-mRNA-processing_factor_19-like	Olive	PF08606:Prp19/Pso4-like//PF00400:WD_domain,_G-beta_repeat
LOC111371687	530.516	1.3332	2.51961	0.205663	6.48246	9.02e-11	4.57e-10	XP_022849584.1	kinesin-like_protein_KIN-4C,_transcript_variant_X3	Olive	PF00225:Kinesin_motor_domain
LOC111371690	57.4351	2.54368	5.83075	0.472832	5.37968	7.46e-08	2.94e-07		uncharacterized_LOC111371690	Olive		IPR025422:Transcription factor TGA like domain
LOC111371695	398.622	0.812069	1.75573	0.198458	4.09189	4.28e-05	0.000122746	XP_022849593.1	uncharacterized_LOC111371695,_transcript_variant_X3	Olive	PF12295:Symplekin_tight_junction_protein_C_terminal//PF11935:Domain_of_unknown_function_(DUF3453)	IPR018108:Mitochondrial substrate/solute carrier//IPR023395:Mitochondrial carrier domain superfamily
LOC111371701	479.183	1.15533	2.22736	0.152487	7.57662	3.55e-14	2.25e-13	XP_022849598.1	chlorophyllase-2,_chloroplastic	Olive	PF07224:Chlorophyllase
LOC111371708	332.695	1.62601	3.08659	0.199571	8.14756	3.71e-16	2.65e-15	XP_022849610.1	protein_argonaute_10-like,_transcript_variant_X4	Olive	PF02170:PAZ_domain//PF16486:N-terminal_domain_of_argonaute//PF02171:Piwi_domain//PF16488:Argonaute_linker_2_domain//PF08699:Argonaute_linker_1_domain//PF16487:Mid_domain_of_argonaute
LOC111371731	80.4917	1.09206	2.13178	0.312885	3.4903	0.000482485	0.0011884	XP_022849633.1	3-oxoacyl-[acyl-carrier-protein]_synthase_I,_chloroplastic-like,_transcript_variant_X2	Olive	PF00109:Beta-ketoacyl_synthase,_N-terminal_domain//PF02801:Beta-ketoacyl_synthase,_C-terminal_domain	IPR035513:Invertase/pectin methylesterase inhibitor domain superfamily//IPR006501:Pectinesterase inhibitor domain//IPR034088:Pla a 1-like
LOC111371732	122.426	4.1848	18.1865	0.393401	10.6375	1.99e-26	2.29e-25	XP_022849636.1	auxin_response_factor_9-like,_transcript_variant_X3	Olive	PF06507:Auxin_response_factor//PF02362:B3_DNA_binding_domain	IPR005202:Transcription factor GRAS
LOC111371734	413.855	1.55782	2.94408	0.293196	5.31321	1.08e-07	4.17e-07	XP_022849638.1	cellulose_synthase-like_protein_G3	Olive	PF03552:Cellulose_synthase
LOC111371735	221.676	3.19879	9.18191	0.245017	13.0554	5.92e-39	1.05e-37			Olive
LOC111371742	179.2	0.719685	1.64682	0.235022	3.0622	0.00219716	0.0048713	XP_022849650.1	RRP15-like_protein,_transcript_variant_X6	Olive	PF07890:Rrp15p	IPR001220:Legume lectin domain//IPR000719:Protein kinase domain//IPR017441:Protein kinase, ATP binding site//IPR011009:Protein kinase-like domain superfamily//IPR008271:Serine/threonine-protein kinase, active site//IPR000985:Legume lectin, alpha chain, conserved site//IPR019825:Legume lectin, beta chain, Mn/Ca-binding site//IPR013320:Concanavalin A-like lectin/glucanase domain superfamily
LOC111371744	55.3778	0.946887	1.92771	0.379374	2.49592	0.012563	0.024183	XP_022849652.1	dof_zinc_finger_protein_DOF4.6-like	Olive	PF02701:Dof_domain,_zinc_finger	IPR038088:DELLA, N-terminal domain superfamily//IPR005202:Transcription factor GRAS
LOC111371745	246.28	1.03611	2.0507	0.183145	5.65736	1.54e-08	6.49e-08	XP_022849653.1	transcription_factor_bHLH157-like	Olive	PF14215:bHLH-MYC_and_R2R3-MYB_transcription_factors_N-terminal	IPR003690:Transcription termination factor, mitochondrial/chloroplastic//IPR038538:MTERF superfamily, mitochondrial/chloroplastic
LOC111371746	146.227	0.763302	1.69737	0.245157	3.11353	0.00184865	0.00414757	XP_022849654.1	2-keto-3-deoxy-L-rhamnonate_aldolase-like	Olive	PF03328:HpcH/HpaI_aldolase/citrate_lyase_family	IPR029044:Nucleotide-diphospho-sugar transferases
LOC111371747	722.982	1.1448	2.21116	0.14116	8.10995	5.06e-16	3.59e-15	XP_022849655.1	2-keto-3-deoxy-L-rhamnonate_aldolase-like	Olive	PF03328:HpcH/HpaI_aldolase/citrate_lyase_family	IPR036093:NAC domain superfamily//IPR003441:NAC domain
LOC111371749	408.666	1.1709	2.25152	0.153017	7.65209	1.98e-14	1.28e-13	XP_022849656.1	UPF0160_protein-like	Olive	PF03690:Uncharacterised_protein_family_(UPF0160)
LOC111371750	218.127	1.04758	2.06706	0.208676	5.02013	5.16e-07	1.87e-06	XP_022849658.1	uncharacterized_LOC111371750,_transcript_variant_X2	Olive		IPR000210:BTB/POZ domain//IPR027356:NPH3 domain//IPR011333:SKP1/BTB/POZ domain superfamily
LOC111371754	126.031	1.72458	3.30485	0.326009	5.28999	1.22e-07	4.72e-07	XP_022849662.1	uncharacterized_LOC111371754	Olive	PF04398:Protein_of_unknown_function,_DUF538
LOC111371757	100.89	3.64388	12.5002	0.384539	9.47597	2.64e-21	2.44e-20	XP_022849665.1	uncharacterized_protein_At5g39865-like	Olive	PF00462:Glutaredoxin	IPR017441:Protein kinase, ATP binding site//IPR000719:Protein kinase domain//IPR003527:Mitogen-activated protein (MAP) kinase, conserved site//IPR011009:Protein kinase-like domain superfamily//IPR008271:Serine/threonine-protein kinase, active site
LOC111371761	501.946	0.862677	1.81841	0.241911	3.56609	0.000362348	0.000910159	XP_022849674.1	50S_ribosomal_protein_L11,_chloroplastic	Olive	PF00298:Ribosomal_protein_L11,_RNA_binding_domain//PF03946:Ribosomal_protein_L11,_N-terminal_domain	IPR017853:Glycoside hydrolase superfamily
LOC111371766	35204.8	2.47515	5.56026	0.129135	19.1672	6.95e-82	3.22e-80	XP_022849681.1	catalase_isozyme_3-like	Olive	PF06628:Catalase-related_immune-responsive//PF00199:Catalase
LOC111371772	780.981	5.58912	48.1387	0.236121	23.6706	7.24e-124	6.04e-122	XP_022849691.1	growth-regulating_factor_1-like	Olive	PF08880:QLQ//PF08879:WRC	IPR010914:RsgA GTPase domain//IPR027417:P-loop containing nucleoside triphosphate hydrolase//IPR004881:Ribosome biogenesis GTPase RsgA//IPR012340:Nucleic acid-binding, OB-fold//IPR030378:Circularly permuted (CP)-type guanine nucleotide-binding (G) domain
LOC111371774	347.948	3.51323	11.4179	0.248902	14.1149	3.08e-45	6.58e-44	XP_022849694.1	probable_membrane-associated_kinase_regulator_2	Olive
LOC111371777	90.1089	0.813073	1.75695	0.296505	2.74219	0.00610302	0.0125084	XP_022849697.1	ethylene-responsive_transcription_factor_CRF1-like	Olive	PF00847:AP2_domain	IPR036318:FAD-binding, type PCMH-like superfamily//IPR016171:Vanillyl-alcohol oxidase, C-terminal subdomain 2//IPR016164:FAD-linked oxidase-like, C-terminal//IPR016166:FAD-binding domain, PCMH-type
LOC111371779	170.084	0.79256	1.73215	0.216583	3.65939	0.000252819	0.000650589	XP_022849699.1	AT-hook_motif_nuclear-localized_protein_1-like	Olive	PF03479:Plants_and_Prokaryotes_Conserved_(PCC)_domain	IPR000270:PB1 domain//IPR034891:Protein NLP, PB1 domain//IPR003035:RWP-RK domain
LOC111371780	375.905	1.62555	3.08559	0.190043	8.55358	1.19e-17	9.26e-17	XP_022849700.1	AT-hook_motif_nuclear-localized_protein_9-like	Olive	PF03479:Plants_and_Prokaryotes_Conserved_(PCC)_domain
LOC111371781	192.015	0.635591	1.55357	0.201008	3.16202	0.00156679	0.0035572	XP_022850163.1	protein_transport_protein_Sec24-like_CEF,_transcript_variant_X9	Olive	PF00626:Gelsolin_repeat
LOC111371787	1847.57	1.35251	2.55356	0.108381	12.4792	9.69e-36	1.55e-34	XP_022849709.1	uncharacterized_LOC111371787	Olive	PF04646:Protein_of_unknown_function,_DUF604
LOC111371798	122.777	2.06715	4.19058	0.282406	7.31979	2.48e-13	1.5e-12	XP_022849731.1	protein_TIFY_8-like,_transcript_variant_X5	Olive	PF06200:tify_domain
LOC111371799	62.1354	3.09278	8.53136	0.437391	7.07096	1.54e-12	8.82e-12	XP_022849732.1	uncharacterized_LOC111371799	Olive		IPR036093:NAC domain superfamily//IPR003441:NAC domain
LOC111371802	794.884	1.91772	3.77827	0.144849	13.2395	5.19e-40	9.46e-39	XP_022849736.1	probable_1-deoxy-D-xylulose-5-phosphate_synthase,_chloroplastic,_transcript_variant_X2	Olive	PF02780:Transketolase,_C-terminal_domain	IPR036397:Ribonuclease H superfamily//IPR012337:Ribonuclease H-like superfamily
LOC111371804	379.843	0.594069	1.5095	0.156058	3.80673	0.000140818	0.000375741	XP_022849744.1	pentatricopeptide_repeat-containing_protein_At3g54980,_mitochondrial-like,_transcript_variant_X4	Olive	PF13812:Pentatricopeptide_repeat_domain//PF01535:PPR_repeat//PF13041:PPR_repeat_family	IPR000008:C2 domain//IPR011993:PH-like domain superfamily//IPR031968:VASt domain//IPR035892:C2 domain superfamily//IPR004182:GRAM domain
LOC111371805	85.548	1.34642	2.54281	0.296908	4.53482	5.77e-06	1.84e-05		uncharacterized_LOC111371805	Olive		IPR033118:EXPERA domain
LOC111371807	176.611	0.82254	1.76852	0.233753	3.51885	0.000433422	0.00107511	XP_022849749.1	formin-like_protein_18,_transcript_variant_X6	Olive	PF10409:C2_domain_of_PTEN_tumour-suppressor_protein//PF02181:Formin_Homology_2_Domain
LOC111371809	2098.49	0.731702	1.6606	0.170808	4.28376	1.84e-05	5.52e-05	XP_022849752.1	pleiotropic_drug_resistance_protein_1-like,_transcript_variant_X2	Olive	PF08370:Plant_PDR_ABC_transporter_associated//PF14510:ABC-transporter_N-terminal//PF01061:ABC-2_type_transporter//PF00005:ABC_transporter	IPR043159:D-galactoside/L-rhamnose binding SUEL lectin domain superfamily//IPR008979:Galactose-binding-like domain superfamily//IPR000922:D-galactoside/L-rhamnose binding SUEL lectin domain//IPR001944:Glycoside hydrolase, family 35//IPR019801:Glycoside hydrolase, family 35, conserved site//IPR017853:Glycoside hydrolase superfamily
LOC111371811	582.498	1.64438	3.12613	0.154005	10.6774	1.3e-26	1.5e-25	XP_022849754.1	probable_protein_phosphatase_2C_60,_transcript_variant_X2	Olive	PF00481:Protein_phosphatase_2C	IPR000315:B-box-type zinc finger
LOC111371817	130.996	3.07435	8.4231	0.303769	10.1207	4.47e-24	4.67e-23		uncharacterized_LOC111371817	Olive
LOC111371820	594.49	0.351779	1.27613	0.135099	2.60386	0.00921807	0.0182532	XP_022849763.1	pyruvate_kinase_isozyme_A,_chloroplastic-like	Olive	PF00224:Pyruvate_kinase,_barrel_domain	IPR036047:F-box-like domain superfamily
LOC111371823	200.152	2.88819	7.40342	0.795833	3.62914	0.000284366	0.000726378	XP_022849766.1	calmodulin-like_protein_11,_transcript_variant_X2	Olive	PF13499:EF-hand_domain_pair	IPR012341:Six-hairpin glycosidase-like superfamily//IPR008928:Six-hairpin glycosidase superfamily
LOC111371833	261.41	0.754925	1.68754	0.318036	2.37371	0.0176103	0.0327995			Olive		IPR002885:Pentatricopeptide repeat//IPR011990:Tetratricopeptide-like helical domain superfamily
LOC111371836	5613.99	0.539885	1.45386	0.104265	5.17801	2.24e-07	8.42e-07	XP_022849775.1	FRIGIDA-like_protein_3	Olive	PF07899:Frigida-like_protein	IPR000626:Ubiquitin-like domain//IPR029071:Ubiquitin-like domain superfamily
LOC111371839	65.5814	2.48574	5.60122	0.385277	6.45183	1.11e-10	5.56e-10	XP_022849777.1	uncharacterized_LOC111371839	Olive	PF07816:Protein_of_unknown_function_(DUF1645)	IPR023395:Mitochondrial carrier domain superfamily//IPR002067:Mitochondrial carrier protein//IPR018108:Mitochondrial substrate/solute carrier
LOC111371905	51.1133	2.86635	7.29216	0.481625	5.95141	2.66e-09	1.2e-08		uncharacterized_LOC111371905	Olive
LOC111371909	106.592	1.24447	2.36931	0.267069	4.65973	3.17e-06	1.05e-05	XP_022849829.1	ras-related_protein_RABA1f-like	Olive	PF00071:Ras_family	IPR000048:IQ motif, EF-hand binding site//IPR005559:CG-1 DNA-binding domain//IPR020683:Ankyrin repeat-containing domain//IPR036770:Ankyrin repeat-containing domain superfamily//IPR013783:Immunoglobulin-like fold//IPR002110:Ankyrin repeat//IPR014756:Immunoglobulin E-set
LOC111371970	63.586	1.21873	2.32741	0.341119	3.57273	0.00035328	0.00088911			Olive		IPR015797:NUDIX hydrolase-like domain superfamily//IPR000086:NUDIX hydrolase domain//IPR020476:NUDIX hydrolase//IPR020084:NUDIX hydrolase, conserved site
LOC111371974	1034.97	0.285213	1.21859	0.116588	2.44632	0.0144322	0.0274191	XP_022849884.1	agamous-like_MADS-box_protein_AGL81	Olive	PF00319:SRF-type_transcription_factor_(DNA-binding_and_dimerisation_domain)	IPR001494:Importin-beta, N-terminal domain//IPR011989:Armadillo-like helical//IPR016024:Armadillo-type fold
LOC111371982	3682.88	0.287169	1.22024	0.106037	2.7082	0.00676499	0.013747	XP_022849891.1	60S_ribosomal_protein_L6-like	Olive	PF03868:Ribosomal_protein_L6,_N-terminal_domain//PF01159:Ribosomal_protein_L6e	IPR023635:Peptide deformylase//IPR036821:Peptide deformylase superfamily
LOC111371985	51.9293	1.39531	2.63045	0.379216	3.67946	0.00023373	0.000604753	XP_022849893.1	replication_factor_C_subunit_2-like	Olive	PF00004:ATPase_family_associated_with_various_cellular_activities_(AAA)//PF08542:Replication_factor_C_C-terminal_domain	IPR036525:Tubulin/FtsZ, GTPase domain superfamily//IPR023123:Tubulin, C-terminal//IPR000217:Tubulin//IPR008280:Tubulin/FtsZ, C-terminal//IPR003008:Tubulin/FtsZ, GTPase domain//IPR013838:Beta tubulin, autoregulation binding site//IPR037103:Tubulin/FtsZ, C-terminal domain superfamily//IPR002453:Beta tubulin//IPR017975:Tubulin, conserved site//IPR018316:Tubulin/FtsZ, 2-layer sandwich domain
LOC111371990	629.953	0.51264	1.42666	0.185142	2.7689	0.00562459	0.0116007	XP_022849899.1	putative_transcription_elongation_factor_SPT5_homolog_1	Olive
LOC111372036	108.301	0.646695	1.56558	0.267095	2.42122	0.0154686	0.0291868	XP_022849953.1	probable_WRKY_transcription_factor_28	Olive	PF03106:WRKY_DNA_-binding_domain	IPR013136:WSTF/Acf1/Cbp146//IPR018501:DDT domain
LOC111372040	104.51	2.91964	7.56655	0.344059	8.48585	2.14e-17	1.64e-16	XP_022849957.1	GDSL_esterase/lipase_At4g10955-like	Olive		IPR004827:Basic-leucine zipper domain
LOC111372046	125.276	1.39853	2.63633	0.260493	5.36879	7.93e-08	3.11e-07	XP_022849967.1	AP2-like_ethylene-responsive_transcription_factor_At1g16060	Olive	PF00847:AP2_domain
LOC111372047	320.602	1.02262	2.0316	0.188881	5.4141	6.16e-08	2.45e-07	XP_022849968.1	probable_folate-biopterin_transporter_3	Olive	PF03092:BT1_family	IPR036869:Chaperone J-domain superfamily
LOC111372048	387.481	2.42924	5.38611	0.180484	13.4596	2.7e-41	5.14e-40	XP_022849969.1	aspartyl_protease_family_protein_At5g10770	Olive	PF14541:Xylanase_inhibitor_C-terminal//PF14543:Xylanase_inhibitor_N-terminal
LOC111372050	81.8194	0.866093	1.82272	0.315374	2.74624	0.00602834	0.0123727	XP_022849972.1	uncharacterized_protein_At2g39795,_mitochondrial-like	Olive	PF02330:Mitochondrial_glycoprotein
LOC111372059	429.6	0.944934	1.9251	0.147276	6.41606	1.4e-10	6.98e-10	XP_022849984.1	prohibitin-1,_mitochondrial-like,_transcript_variant_X6	Olive	PF01145:SPFH_domain_/_Band_7_family
LOC111372067	7410.96	1.22753	2.34166	0.194659	6.30605	2.86e-10	1.39e-09	XP_022849992.1	serine_carboxypeptidase-like_18	Olive	PF00450:Serine_carboxypeptidase	IPR014721:Ribosomal protein S5 domain 2-type fold, subgroup//IPR020568:Ribosomal protein S5 domain 2-type fold
LOC111372070	571.154	0.922256	1.89508	0.217807	4.23429	2.29e-05	6.81e-05	XP_022849995.1	60S_ribosomal_protein_L11	Olive	PF00673:ribosomal_L5P_family_C-terminus//PF00281:Ribosomal_protein_L5
LOC111372072	388.732	0.384306	1.30523	0.160516	2.39419	0.0166569	0.0312026	XP_022849999.1	protein_SYM1,_transcript_variant_X3	Olive	PF04117:Mpv17_/_PMP22_family	IPR011527:ABC transporter type 1, transmembrane domain//IPR036640:ABC transporter type 1, transmembrane domain superfamily//IPR027417:P-loop containing nucleoside triphosphate hydrolase//IPR003593:AAA+ ATPase domain//IPR003439:ABC transporter-like//IPR017871:ABC transporter, conserved site
LOC111372081	67.2878	2.09281	4.26577	0.362251	5.77723	7.59e-09	3.3e-08	XP_022850020.1	protein_TOO_MANY_MOUTHS-like	Olive	PF13855:Leucine_rich_repeat	IPR001214:SET domain//IPR025787:Histone-lysine N-methyltransferase, SET2, plant//IPR003616:Post-SET domain//IPR006560:AWS domain
LOC111372089	66.7087	2.15831	4.4639	0.373497	5.77865	7.53e-09	3.27e-08		uncharacterized_LOC111372089	Olive		IPR027417:P-loop containing nucleoside triphosphate hydrolase//IPR038718:SNF2-like, N-terminal domain superfamily
LOC111372091	926.371	2.93549	7.65017	0.205808	14.2633	3.71e-46	8.1e-45	XP_022850031.1	protein_DETOXIFICATION_40-like	Olive	PF01554:MatE
LOC111372094	68.2099	1.51336	2.85473	0.37324	4.05464	5.02e-05	0.000142839	XP_022850032.1	E3_ubiquitin-protein_ligase_ATL41-like	Olive	PF13639:Ring_finger_domain	IPR011009:Protein kinase-like domain superfamily//IPR000719:Protein kinase domain//IPR008271:Serine/threonine-protein kinase, active site//IPR017441:Protein kinase, ATP binding site//IPR039192:Glycogen synthase kinase 3, catalytic domain
LOC111372095	85.5272	1.20893	2.31165	0.294189	4.10934	3.97e-05	0.000114337	XP_022850033.1	PLASMODESMATA_CALLOSE-BINDING_PROTEIN_5-like	Olive	PF07983:X8_domain
LOC111372106	350.185	0.686962	1.60989	0.194082	3.53954	0.000400827	0.00100054			Olive		IPR002885:Pentatricopeptide repeat//IPR011990:Tetratricopeptide-like helical domain superfamily
LOC111372109	497.03	1.47384	2.7776	0.495891	2.97211	0.00295764	0.00640532	XP_022850049.1	probable_E3_ubiquitin-protein_ligase_RHG1A	Olive	PF13639:Ring_finger_domain	IPR015943:WD40/YVTN repeat-like-containing domain superfamily//IPR036322:WD40-repeat-containing domain superfamily//IPR001680:WD40 repeat
LOC111372114	72.9833	2.07247	4.20607	0.427406	4.84896	1.24e-06	4.31e-06	XP_022850060.1	transcription_factor_MYBS1-like	Olive	PF00249:Myb-like_DNA-binding_domain	IPR013026:Tetratricopeptide repeat-containing domain//IPR011990:Tetratricopeptide-like helical domain superfamily//IPR019734:Tetratricopeptide repeat
LOC111372117	281.673	0.782744	1.7204	0.202294	3.86935	0.000109126	0.000295826	XP_022850063.1	actin-related_protein_4-like	Olive	PF00022:Actin
LOC111372120	127.204	2.30758	4.95052	0.289485	7.97133	1.57e-15	1.08e-14	XP_022850069.1	kinesin-like_protein_KIN-8A	Olive	PF00225:Kinesin_motor_domain	IPR027417:P-loop containing nucleoside triphosphate hydrolase//IPR003439:ABC transporter-like//IPR017871:ABC transporter, conserved site//IPR003593:AAA+ ATPase domain
LOC111372122	67.3731	1.05612	2.07934	0.369471	2.85847	0.00425683	0.0089672	XP_022850070.1	protein_TIFY_6B-like	Olive	PF06200:tify_domain//PF09425:Divergent_CCT_motif	IPR024709:Putative O-fucosyltransferase, plant
LOC111372133	76.9548	0.817637	1.76252	0.323058	2.53093	0.0113761	0.0221009		uncharacterized_LOC111372133	Olive		IPR001841:Zinc finger, RING-type//IPR013083:Zinc finger, RING/FYVE/PHD-type
LOC111372134	118.12	0.684388	1.60702	0.246774	2.77334	0.00554839	0.0114618			Olive		IPR004483:Helicase SMUBP-2/Hcs1-like//IPR041679:DNA2/NAM7 helicase-like, AAA domain//IPR014001:Helicase superfamily 1/2, ATP-binding domain//IPR027417:P-loop containing nucleoside triphosphate hydrolase//IPR003593:AAA+ ATPase domain
LOC111372135	121.274	0.783667	1.7215	0.25221	3.1072	0.00188867	0.00423086	XP_022850088.1	ras-related_protein_RABA6b-like	Olive	PF00071:Ras_family	IPR036457:PPM-type phosphatase domain superfamily//IPR001932:PPM-type phosphatase domain
LOC111372146	143.263	0.58315	1.49812	0.260461	2.23892	0.0251614	0.0451766	XP_022850110.1	uncharacterized_LOC111372146,_transcript_variant_X2	Olive	PF02517:CPBP_intramembrane_metalloprotease
LOC111372154	2724.45	0.92592	1.8999	0.130195	7.11177	1.15e-12	6.62e-12	XP_022850117.1	GDSL_esterase/lipase_At2g04570-like	Olive	PF00657:GDSL-like_Lipase/Acylhydrolase
LOC111372156	88.2755	4.47924	22.3042	0.523818	8.55114	1.22e-17	9.45e-17	XP_022850120.1	putative_cyclin-D6-1,_transcript_variant_X2	Olive	PF00134:Cyclin,_N-terminal_domain//PF02984:Cyclin,_C-terminal_domain
LOC111372167	2561.38	0.494476	1.40881	0.108945	4.53876	5.66e-06	1.81e-05	XP_022850134.1	pre-mRNA-processing-splicing_factor_8A	Olive	PF10598:RNA_recognition_motif_of_the_spliceosomal_PrP8//PF10596:U6-snRNA_interacting_domain_of_PrP8//PF08084:PROCT_(NUC072)_domain//PF10597:U5-snRNA_binding_site_2_of_PrP8//PF08083:PROCN_(NUC071)_domain//PF12134:PRP8_domain_IV_core//PF01398:JAB1/Mov34/MPN/PAD-1_ubiquitin_protease
LOC111372174	267.959	0.640969	1.55938	0.221179	2.89796	0.00375599	0.00798872	XP_022850144.1	uncharacterized_LOC111372174,_transcript_variant_X3	Olive
LOC111372178	163.547	1.26976	2.41122	0.239753	5.29613	1.18e-07	4.57e-07	XP_022850147.1	uncharacterized_LOC111372178	Olive
LOC111372186	145.252	0.68424	1.60686	0.252708	2.70763	0.0067766	0.0137665	XP_022850159.1	cysteine_desulfurase_1,_chloroplastic-like	Olive	PF00266:Aminotransferase_class-V
LOC111372188	501.207	0.977856	1.96954	0.145154	6.73669	1.62e-11	8.65e-11	XP_022850166.1	pentatricopeptide_repeat-containing_protein_At2g03880,_mitochondrial-like	Olive	PF01535:PPR_repeat//PF14432:DYW_family_of_nucleic_acid_deaminases//PF13041:PPR_repeat_family	IPR036424:Decaprenyl diphosphate synthase-like superfamily//IPR001441:Decaprenyl diphosphate synthase-like//IPR018520:Di-trans-poly-cis-decaprenylcistransferase-like, conserved site
LOC111372192	314.579	0.828368	1.77568	0.176112	4.70364	2.56e-06	8.56e-06	XP_022850175.1	homeobox-leucine_zipper_protein_HOX10-like,_transcript_variant_X6	Olive	PF00046:Homeodomain
LOC111372195	826.532	1.26207	2.39839	0.143284	8.80814	1.27e-18	1.03e-17	XP_022850187.1	uncharacterized_LOC111372195,_transcript_variant_X9	Olive	PF16201:Nucleolar_pre-ribosomal-associated_protein_1//PF11707:Ribosome_60S_biogenesis_N-terminal
LOC111372198	148.468	0.770741	1.70615	0.243005	3.17171	0.00151545	0.0034469	XP_022850193.1	transcription_factor_RAX2-like	Olive	PF00249:Myb-like_DNA-binding_domain
LOC111372199	168.098	0.661597	1.58183	0.211459	3.12872	0.00175569	0.00395298	XP_022850194.1	uncharacterized_LOC111372199	Olive	PF13301:Protein_of_unknown_function_(DUF4079)	IPR005225:Small GTP-binding protein domain//IPR027417:P-loop containing nucleoside triphosphate hydrolase
LOC111372200	2171.27	0.592304	1.50765	0.106751	5.54845	2.88e-08	1.18e-07	XP_022850196.1	S-adenosylmethionine_synthase_3,_transcript_variant_X2	Olive	PF00438:S-adenosylmethionine_synthetase,_N-terminal_domain//PF02772:S-adenosylmethionine_synthetase,_central_domain//PF02773:S-adenosylmethionine_synthetase,_C-terminal_domain	IPR029021:Protein-tyrosine phosphatase-like//IPR016130:Protein-tyrosine phosphatase, active site//IPR014020:Tensin phosphatase, C2 domain//IPR029023:Tensin-type phosphatase domain
LOC111372205	889.739	2.16726	4.49169	0.157963	13.7201	7.7e-43	1.53e-41	XP_022850199.1	ACT_domain-containing_protein_ACR10-like	Olive		IPR018303:P-type ATPase, phosphorylation site//IPR036412:HAD-like superfamily//IPR006408:P-type ATPase, subfamily IIB//IPR023299:P-type ATPase, cytoplasmic domain N//IPR023214:HAD superfamily//IPR008250:P-type ATPase, A domain superfamily//IPR023298:P-type ATPase, transmembrane domain superfamily//IPR001757:P-type ATPase//IPR004014:Cation-transporting P-type ATPase, N-terminal
LOC111372210	340.51	4.00629	16.0699	0.656272	6.10461	1.03e-09	4.81e-09	XP_022850203.1	probable_pectate_lyase_12	Olive	PF00544:Pectate_lyase
LOC111372214	133.481	0.591183	1.50648	0.249547	2.36903	0.017835	0.0331716		uncharacterized_LOC111372214	Olive		IPR032675:Leucine-rich repeat domain superfamily
LOC111372216	87.3556	1.40622	2.65041	0.335985	4.18535	2.85e-05	8.35e-05	XP_022850209.1	glycolipid_transfer_protein_3-like	Olive	PF08718:Glycolipid_transfer_protein_(GLTP)	IPR014811:Argonaute, linker 1 domain//IPR036085:PAZ domain superfamily//IPR012337:Ribonuclease H-like superfamily//IPR003165:Piwi domain//IPR036397:Ribonuclease H superfamily
LOC111372223	123.363	1.58008	2.98986	0.287887	5.48853	4.05e-08	1.64e-07	XP_022850217.1	G-box-binding_factor_4-like,_transcript_variant_X2	Olive
LOC111372224	197.598	0.560033	1.4743	0.198442	2.82215	0.00477034	0.00996964	XP_022850218.1	uncharacterized_LOC111372224	Olive	PF14360:PAP2_superfamily_C-terminal
LOC111372226	1114.12	0.679044	1.60108	0.1568	4.33065	1.49e-05	4.51e-05	XP_022850226.1	uncharacterized_LOC111372226,_transcript_variant_X5	Olive
LOC111372227	120.776	2.83282	7.12463	0.331469	8.54626	1.27e-17	9.85e-17	XP_022850227.1	ethylene-responsive_transcription_factor_ABR1-like,_transcript_variant_X2	Olive	PF00847:AP2_domain	IPR025605:OST-HTH/LOTUS domain
LOC111372230	694.354	0.529484	1.44341	0.136062	3.89149	9.96e-05	0.000271859	XP_022850228.1	protein_S-acyltransferase_8-like	Olive	PF01529:DHHC_palmitoyltransferase	IPR017887:Transcription factor TCP subgroup
LOC111372236	274.051	0.462911	1.37832	0.173464	2.66862	0.00761624	0.0153177	XP_022850234.1	uncharacterized_LOC111372236,_transcript_variant_X3	Olive
LOC111372240	164.034	3.85437	14.4637	0.32281	11.9401	7.32e-33	1.08e-31	XP_022850243.1	tryptophan_aminotransferase-related_protein_4-like	Olive	PF04863:Alliinase_EGF-like_domain//PF04864:Allinase	IPR036318:FAD-binding, type PCMH-like superfamily//IPR016170:Cytokinin dehydrogenase, C-terminal domain superfamily//IPR016166:FAD-binding domain, PCMH-type//IPR016164:FAD-linked oxidase-like, C-terminal//IPR016169:FAD-binding, type PCMH, subdomain 2//IPR016167:FAD-binding, type PCMH, subdomain 1
LOC111372242	308.548	1.66844	3.17871	0.615237	2.71186	0.00669062	0.0136074	XP_022850250.1	probable_disease_resistance_protein_At4g27220	Olive	PF00931:NB-ARC_domain	IPR000407:Nucleoside phosphatase GDA1/CD39
LOC111372245	1232.46	0.552459	1.46658	0.111751	4.94368	7.67e-07	2.73e-06	XP_022850257.1	protein_NRT1/_PTR_FAMILY_5.10-like	Olive	PF00854:POT_family	IPR006015:Universal stress protein A family//IPR014729:Rossmann-like alpha/beta/alpha sandwich fold
LOC111372246	2980.39	2.78053	6.87102	0.120361	23.1016	4.46e-118	3.45e-116	XP_022850258.1	protein_NRT1/_PTR_FAMILY_5.10-like	Olive	PF00854:POT_family
LOC111372248	113.587	2.09624	4.27593	0.287621	7.2882	3.14e-13	1.88e-12			Olive		IPR002885:Pentatricopeptide repeat//IPR011990:Tetratricopeptide-like helical domain superfamily
LOC111372249	147.391	1.48308	2.79546	0.245798	6.03376	1.6e-09	7.36e-09	XP_022850259.1	protein_NRT1/_PTR_FAMILY_5.10-like	Olive	PF00854:POT_family	IPR013785:Aldolase-type TIM barrel//IPR036068:Nicotinate phosphoribosyltransferase-like, C-terminal
LOC111372254	809.256	0.938081	1.91598	0.127085	7.3815	1.57e-13	9.54e-13	XP_022850267.1	protein_NRT1/_PTR_FAMILY_5.10-like,_transcript_variant_X2	Olive	PF00854:POT_family	IPR000719:Protein kinase domain//IPR008271:Serine/threonine-protein kinase, active site//IPR011009:Protein kinase-like domain superfamily//IPR017441:Protein kinase, ATP binding site
LOC111372257	101.902	1.32997	2.51398	0.282361	4.71018	2.47e-06	8.31e-06		uncharacterized_LOC111372257,_transcript_variant_X2	Olive		IPR003388:Reticulon
LOC111372259	3237.43	0.572769	1.48738	0.1169	4.89966	9.6e-07	3.37e-06	XP_022850270.1	patellin-3-like	Olive	PF00650:CRAL/TRIO_domain//PF03765:CRAL/TRIO,_N-terminal_domain	IPR000095:CRIB domain//IPR036936:CRIB domain superfamily
LOC111372260	1502.02	0.512188	1.42621	0.108021	4.74154	2.12e-06	7.19e-06	XP_022850271.1	patellin-3	Olive	PF00650:CRAL/TRIO_domain//PF03765:CRAL/TRIO,_N-terminal_domain
LOC111372262	55.8568	1.86757	3.64917	0.396213	4.71355	2.43e-06	8.18e-06	XP_022850273.1	uncharacterized_LOC111372262,_transcript_variant_X5	Olive		IPR000891:Pyruvate carboxyltransferase//IPR013785:Aldolase-type TIM barrel
LOC111372270	81.1175	1.29306	2.45047	0.37668	3.43277	0.000597444	0.00145199	XP_022850280.1	amino_acid_permease_3-like	Olive	PF01490:Transmembrane_amino_acid_transporter_protein	IPR029044:Nucleotide-diphospho-sugar transferases
LOC111372273	1345.92	1.06377	2.09038	0.206899	5.14149	2.73e-07	1.02e-06	XP_022850286.1	proteasome_subunit_beta_type-3-A,_transcript_variant_X2	Olive	PF00227:Proteasome_subunit	IPR016093:MIR motif//IPR036300:Mir domain superfamily
LOC111372274	454.629	0.880329	1.8408	0.15921	5.52936	3.21e-08	1.32e-07	XP_022850290.1	probable_RNA_helicase_SDE3,_transcript_variant_X4	Olive
LOC111372276	177.44	0.657747	1.57762	0.212501	3.09527	0.00196634	0.00439343	XP_022850295.1	TITAN-like_protein	Olive	PF14968:Coiled_coil_protein_84	IPR010409:GAGA-binding transcriptional activator
LOC111372282	262.663	0.543957	1.45797	0.17524	3.10407	0.00190879	0.00427336	XP_022850306.1	small_RNA_degrading_nuclease_5	Olive	PF00929:Exonuclease	IPR000719:Protein kinase domain//IPR008271:Serine/threonine-protein kinase, active site//IPR017441:Protein kinase, ATP binding site//IPR011009:Protein kinase-like domain superfamily
LOC111372286	3639.63	1.86993	3.65516	0.107089	17.4616	2.81e-68	9.99e-67	XP_022850312.1	glucan_endo-1,3-beta-glucosidase_12-like	Olive	PF07983:X8_domain//PF00332:Glycosyl_hydrolases_family_17	IPR037151:Alpha-ketoglutarate-dependent dioxygenase AlkB-like superfamily
LOC111372292	215.888	0.752467	1.68467	0.226739	3.31865	0.000904529	0.00213956	XP_022850323.1	uncharacterized_LOC111372292	Olive
LOC111372298	642.721	0.457725	1.37337	0.14145	3.23595	0.0012124	0.00280584	XP_022850328.1	L-ascorbate_oxidase_homolog	Olive	PF00394:Multicopper_oxidase//PF07732:Multicopper_oxidase//PF07731:Multicopper_oxidase	IPR000313:PWWP domain
LOC111372299	381.151	1.30963	2.47878	0.158803	8.24692	1.63e-16	1.19e-15	XP_022850445.1	potassium_channel_SKOR-like,_transcript_variant_X2	Olive	PF00520:Ion_transport_protein//PF12796:Ankyrin_repeats_(3_copies)//PF00023:Ankyrin_repeat//PF00027:Cyclic_nucleotide-binding_domain//PF11834:KHA,_dimerisation_domain_of_potassium_ion_channel	IPR038526:Ribosomal protein L22e superfamily
LOC111372307	813.806	1.03669	2.05151	0.126375	8.20322	2.34e-16	1.69e-15	XP_022850347.1	uncharacterized_protein_At1g76660-like,_transcript_variant_X3	Olive
LOC111372308	58.5199	1.96865	3.91402	0.390651	5.03942	4.67e-07	1.7e-06	XP_022850348.1	type_I_inositol_polyphosphate_5-phosphatase_1-like	Olive		IPR036291:NAD(P)-binding domain superfamily
LOC111372310	628.318	1.77747	3.42825	0.140378	12.662	9.6e-37	1.58e-35	XP_022850350.1	putative_UPF0481_protein_At3g02645,_transcript_variant_X2	Olive	PF03140:Plant_protein_of_unknown_function	IPR000719:Protein kinase domain//IPR017441:Protein kinase, ATP binding site//IPR008271:Serine/threonine-protein kinase, active site//IPR011009:Protein kinase-like domain superfamily
LOC111372311	100.724	0.81085	1.75424	0.33461	2.42327	0.0153814	0.0290435	XP_022850351.1	uncharacterized_LOC111372311	Olive		IPR036638:Helix-loop-helix DNA-binding domain superfamily//IPR011598:Myc-type, basic helix-loop-helix (bHLH) domain
LOC111372323	113.042	3.44317	10.8767	0.42424	8.11609	4.81e-16	3.41e-15	XP_022850376.1	thaumatin-like_protein	Olive	PF00314:Thaumatin_family
LOC111372325	286.581	0.796165	1.73648	0.248878	3.19901	0.00137899	0.00316198	XP_022850378.1	peptidyl-prolyl_cis-trans_isomerase_FKBP17-2,_chloroplastic-like	Olive	PF00254:FKBP-type_peptidyl-prolyl_cis-trans_isomerase	IPR032675:Leucine-rich repeat domain superfamily
LOC111372327	456.051	0.784544	1.72255	0.227119	3.45433	0.000551654	0.00134684	XP_022850385.1	uncharacterized_LOC111372327,_transcript_variant_X5	Olive	PF00538:linker_histone_H1_and_H5_family	IPR035979:RNA-binding domain superfamily//IPR036361:SAP domain superfamily//IPR034257:Acinus, RNA recognition motif//IPR003034:SAP domain
LOC111372328	236.708	1.90694	3.75013	0.202468	9.41849	4.58e-21	4.17e-20	XP_022850386.1	uncharacterized_GPI-anchored_protein_At4g28100-like	Olive
LOC111372332	872.951	0.381773	1.30294	0.12133	3.14656	0.00165202	0.00373356	XP_022850390.1	uncharacterized_LOC111372332	Olive	PF07712:Stress_up-regulated_Nod_19	IPR003851:Zinc finger, Dof-type
LOC111372339	59.9124	1.21757	2.32555	0.350335	3.47545	0.000509991	0.00125239	XP_022850396.1	pentatricopeptide_repeat-containing_protein_At5g50990	Olive	PF14432:DYW_family_of_nucleic_acid_deaminases//PF13041:PPR_repeat_family//PF01535:PPR_repeat	IPR029058:Alpha/Beta hydrolase fold
LOC111372342	337.287	1.92257	3.79098	0.208498	9.22103	2.94e-20	2.58e-19	XP_022850402.1	cytochrome_P450_97B2,_chloroplastic,_transcript_variant_X2	Olive	PF00067:Cytochrome_P450	IPR033890:GDP-mannose 3,5-epimerase//IPR036291:NAD(P)-binding domain superfamily
LOC111372345	112.05	0.730727	1.65947	0.297439	2.45673	0.0140209	0.026719	XP_022850411.1	probable_cyclic_nucleotide-gated_ion_channel_20,_chloroplastic	Olive	PF00520:Ion_transport_protein	IPR001471:AP2/ERF domain//IPR036955:AP2/ERF domain superfamily//IPR016177:DNA-binding domain superfamily
LOC111372350	1036.75	0.956606	1.94074	0.120126	7.96334	1.67e-15	1.15e-14	XP_022850416.1	auxin_response_factor_17-like	Olive	PF02362:B3_DNA_binding_domain//PF06507:Auxin_response_factor
LOC111372354	131.062	1.44118	2.71543	0.246651	5.84298	5.13e-09	2.26e-08	XP_022850417.1	oxygen-evolving_enhancer_protein_2,_chloroplastic-like	Olive	PF01789:PsbP
LOC111372356	871.047	0.551013	1.46511	0.122664	4.49207	7.05e-06	2.23e-05	XP_022850422.1	DExH-box_ATP-dependent_RNA_helicase_DExH6-like,_transcript_variant_X3	Olive	PF00270:DEAD/DEAH_box_helicase//PF07717:Oligonucleotide/oligosaccharide-binding_(OB)-fold//PF04408:Helicase_associated_domain_(HA2)//PF00271:Helicase_conserved_C-terminal_domain
LOC111372360	792.97	0.436956	1.35374	0.128402	3.40303	0.000666427	0.00160676	XP_022850431.1	uncharacterized_LOC111372360	Olive		IPR037104:Annexin superfamily//IPR009118:Annexin D, plant//IPR018502:Annexin repeat//IPR001464:Annexin
LOC111372362	126.471	0.960506	1.94599	0.24402	3.93617	8.28e-05	0.000228657	XP_022850434.1	(S)-ureidoglycine_aminohydrolase	Olive
LOC111372363	669.379	1.39467	2.62929	0.166767	8.363	6.11e-17	4.57e-16	XP_022850441.1	histidine_kinase_2-like,_transcript_variant_X7	Olive	PF00512:His_Kinase_A_(phospho-acceptor)_domain//PF03924:CHASE_domain//PF02518:Histidine_kinase-,_DNA_gyrase_B-,_and_HSP90-like_ATPase
LOC111372365	106.664	0.885892	1.84791	0.267206	3.31539	0.000915166	0.00216243	XP_022850442.1	histidine_kinase_2-like	Olive	PF00072:Response_regulator_receiver_domain	IPR003657:WRKY domain//IPR036576:WRKY domain superfamily
LOC111372372	143.594	0.67953	1.60162	0.228502	2.97385	0.00294093	0.00637242	XP_022850452.1	transcription_factor_TGA2.2-like,_transcript_variant_X3	Olive	PF00170:bZIP_transcription_factor//PF14144:Seed_dormancy_control
LOC111372375	1315.39	0.388806	1.30931	0.126369	3.07676	0.00209262	0.00465456	XP_022850459.1	heparanase-like_protein_1,_transcript_variant_X2	Olive	PF03662:Glycosyl_hydrolase_family_79,_N-terminal_domain	IPR009212:Methylthioribose kinase//IPR011009:Protein kinase-like domain superfamily
LOC111372379	98.4455	0.989169	1.98504	0.293734	3.36757	0.000758346	0.00181497	XP_022850470.1	UDP-glycosyltransferase_83A1-like,_transcript_variant_X5	Olive	PF00201:UDP-glucoronosyl_and_UDP-glucosyl_transferase
LOC111372386	1267.02	0.552987	1.46712	0.15346	3.60347	0.000313996	0.000797282	XP_022850487.1	protein_SPIRAL1-like_3	Olive		IPR001876:Zinc finger, RanBP2-type//IPR000504:RNA recognition motif domain//IPR036443:Zinc finger, RanBP2-type superfamily//IPR035979:RNA-binding domain superfamily//IPR012677:Nucleotide-binding alpha-beta plait domain superfamily
LOC111372389	640.797	5.40019	42.2299	0.254866	21.1884	1.22e-99	7.31e-98	XP_022850495.1	cytochrome_P450_78A5-like	Olive	PF00067:Cytochrome_P450	IPR029058:Alpha/Beta hydrolase fold//IPR000073:Alpha/beta hydrolase fold-1
LOC111372390	267.288	0.967025	1.95481	0.205861	4.69747	2.63e-06	8.8e-06	XP_022850496.1	psbP-like_protein_1,_chloroplastic	Olive	PF01789:PsbP	IPR003124:WH2 domain
LOC111372393	17980.2	2.4358	5.41064	0.611526	3.98315	6.8e-05	0.000190062	XP_022850506.1	serine_carboxypeptidase-like_7	Olive	PF00450:Serine_carboxypeptidase	IPR032675:Leucine-rich repeat domain superfamily//IPR001611:Leucine-rich repeat
LOC111372397	564.685	0.33729	1.26338	0.147423	2.28791	0.0221426	0.0403335	XP_022850510.1	isoaspartyl_peptidase/L-asparaginase_1	Olive	PF01112:Asparaginase	IPR003656:Zinc finger, BED-type//IPR037220:Zinc finger BED domain//IPR012337:Ribonuclease H-like superfamily
LOC111372400	371.6	0.856287	1.81037	0.185777	4.60921	4.04e-06	1.32e-05	XP_022850512.1	transcription_factor_BIM1	Olive	PF00010:Helix-loop-helix_DNA-binding_domain	IPR035892:C2 domain superfamily//IPR031968:VASt domain//IPR000008:C2 domain//IPR011993:PH-like domain superfamily//IPR004182:GRAM domain
LOC111372404	253.584	0.903821	1.87101	0.234131	3.86033	0.000113236	0.000306202	XP_022850517.1	uncharacterized_LOC111372404	Olive		IPR002528:Multi antimicrobial extrusion protein
LOC111372405	528.883	0.891726	1.85539	0.144403	6.17526	6.61e-10	3.13e-09	XP_022850518.1	glycine-rich_RNA-binding_protein_3,_mitochondrial-like	Olive	PF00076:RNA_recognition_motif._(a.k.a._RRM,_RBD,_or_RNP_domain)	IPR001680:WD40 repeat//IPR020472:G-protein beta WD-40 repeat//IPR036322:WD40-repeat-containing domain superfamily//IPR015943:WD40/YVTN repeat-like-containing domain superfamily//IPR017986:WD40-repeat-containing domain
LOC111372408	213.968	3.63966	12.4637	0.266937	13.6349	2.48e-42	4.88e-41	XP_022850520.1	replication_protein_A_70_kDa_DNA-binding_subunit_B-like	Olive	PF08646:Replication_factor-A_C_terminal_domain//PF16900:Replication_protein_A_OB_domain//PF04057:Replication_factor-A_protein_1,_N-terminal_domain//PF01336:OB-fold_nucleic_acid_binding_domain	IPR036378:FAS1 domain superfamily//IPR000782:FAS1 domain
LOC111372414	163.089	0.675754	1.59743	0.214011	3.15757	0.00159091	0.00360732	XP_022850525.1	mitochondrial_import_receptor_subunit_TOM5_homolog	Olive		IPR013078:Histidine phosphatase superfamily, clade-1//IPR001345:Phosphoglycerate/bisphosphoglycerate mutase, active site//IPR029033:Histidine phosphatase superfamily
LOC111372423	9761.28	1.41618	2.66879	0.242244	5.84611	5.03e-09	2.22e-08	XP_022850537.1	putative_serine_carboxypeptidase-like_52	Olive	PF00450:Serine_carboxypeptidase
LOC111372426	118.127	0.9631	1.94949	0.351178	2.74248	0.00609767	0.0124997		uncharacterized_LOC111372426	Olive
LOC111372428	99.6584	1.22086	2.33086	0.286911	4.25521	2.09e-05	6.23e-05		uncharacterized_LOC111372428	Olive		IPR008271:Serine/threonine-protein kinase, active site//IPR017441:Protein kinase, ATP binding site//IPR011009:Protein kinase-like domain superfamily//IPR000719:Protein kinase domain
LOC111372445	558.753	0.415548	1.33381	0.143894	2.88788	0.00387853	0.00823061	XP_022850570.1	probable_alpha,alpha-trehalose-phosphate_synthase_[UDP-forming]_7	Olive	PF00982:Glycosyltransferase_family_20	IPR025585:Photosystem II Pbs27//IPR038450:Photosystem II Pbs27 superfamily
LOC111372462	77.7367	1.25451	2.38587	0.312005	4.02081	5.8e-05	0.000163483	XP_022850580.1	putative_pentatricopeptide_repeat-containing_protein_At1g17630,_transcript_variant_X3	Olive	PF13041:PPR_repeat_family//PF01535:PPR_repeat
LOC111372464	1015.11	0.298721	1.23005	0.115431	2.58788	0.00965692	0.0190404	XP_022850581.1	receptor_homology_region,_transmembrane_domain-_and_RING_domain-containing_protein_2-like	Olive	PF02225:PA_domain//PF13639:Ring_finger_domain	IPR029057:Phosphoribosyltransferase-like//IPR000764:Uridine kinase-like//IPR000836:Phosphoribosyltransferase domain//IPR027417:P-loop containing nucleoside triphosphate hydrolase
LOC111372465	287.957	0.459463	1.37503	0.172339	2.66604	0.00767511	0.0154296	XP_022850583.1	uncharacterized_LOC111372465,_transcript_variant_X2	Olive	PF04765:Protein_of_unknown_function_(DUF616)
LOC111372494	211.111	1.12985	2.18835	0.306557	3.6856	0.000228166	0.000591128	XP_022850612.1	cyclin-dependent_kinases_regulatory_subunit_1-like	Olive	PF01111:Cyclin-dependent_kinase_regulatory_subunit
LOC111372496	51.6386	0.906249	1.87417	0.397139	2.28194	0.0224927	0.0408583	XP_022850613.1	uncharacterized_protein_At1g08160	Olive	PF03168:Late_embryogenesis_abundant_protein
LOC111372502	99.5492	1.2236	2.33528	0.274726	4.45388	8.43e-06	2.65e-05	XP_022850619.1	probable_glucuronoxylan_glucuronosyltransferase_IRX7	Olive	PF03016:Exostosin_family
LOC111372506	549.519	1.57101	2.97113	0.163343	9.61785	6.72e-22	6.39e-21	XP_022850623.1	aspartic_proteinase-like_protein_2,_transcript_variant_X2	Olive	PF14543:Xylanase_inhibitor_N-terminal//PF14541:Xylanase_inhibitor_C-terminal
LOC111372519	741.437	0.989746	1.98583	0.15994	6.18823	6.08e-10	2.89e-09	XP_022850635.1	homeobox-leucine_zipper_protein_ATHB-13-like	Olive	PF02183:Homeobox_associated_leucine_zipper//PF00046:Homeodomain
LOC111372538	784.531	0.895221	1.85989	0.126577	7.07255	1.52e-12	8.72e-12	XP_022850654.1	Niemann-Pick_C1_protein-like	Olive	PF16414:Niemann-Pick_C1_N_terminus//PF02460:Patched_family	IPR036236:Zinc finger C2H2 superfamily//IPR013087:Zinc finger C2H2-type
LOC111372550	490.534	0.419318	1.33729	0.187639	2.23471	0.0254366	0.0456075	XP_022850669.1	chaperone_protein_dnaJ_10-like,_transcript_variant_X3	Olive	PF00226:DnaJ_domain//PF14308:X-domain_of_DnaJ-containing	IPR018253:DnaJ domain, conserved site//IPR019734:Tetratricopeptide repeat//IPR001623:DnaJ domain//IPR013026:Tetratricopeptide repeat-containing domain//IPR011990:Tetratricopeptide-like helical domain superfamily//IPR036869:Chaperone J-domain superfamily
LOC111372560	382.99	1.00494	2.00686	0.221773	4.5314	5.86e-06	1.87e-05	XP_022850692.1	uncharacterized_LOC111372560,_transcript_variant_X5	Olive	PF04784:Protein_of_unknown_function,_DUF547//PF14389:Leucine-zipper_of_ternary_complex_factor_MIP1	IPR018255:Ribosomal protein L10e, conserved site//IPR016180:Ribosomal protein L10e/L16//IPR001197:Ribosomal protein L10e//IPR036920:Ribosomal protein L10e/L16 superfamily
LOC111372563	73.6617	1.29928	2.46106	0.545671	2.38107	0.0172625	0.0322298	XP_022850695.1	uncharacterized_LOC111372563	Olive	PF07889:Protein_of_unknown_function_(DUF1664)
LOC111372565	162.386	1.46735	2.76513	0.267933	5.47655	4.34e-08	1.75e-07		probable_LRR_receptor-like_serine/threonine-protein_kinase_At1g06840	Olive		IPR000073:Alpha/beta hydrolase fold-1//IPR029058:Alpha/Beta hydrolase fold//IPR000639:Epoxide hydrolase-like
LOC111372578	724.688	0.563107	1.47745	0.128685	4.37586	1.21e-05	3.72e-05	XP_022850720.1	zinc_finger_CCCH_domain-containing_protein_55,_transcript_variant_X4	Olive	PF18044:CCCH-type_zinc_finger//PF14608:RNA-binding,_Nab2-type_zinc_finger	IPR001680:WD40 repeat//IPR017986:WD40-repeat-containing domain//IPR036322:WD40-repeat-containing domain superfamily
LOC111372582	215.861	0.950432	1.93245	0.206542	4.60163	4.19e-06	1.36e-05	XP_022850724.1	subtilisin-like_protease_SBT1.6	Olive	PF00082:Subtilase_family//PF17766:Fibronectin_type-III_domain	IPR029044:Nucleotide-diphospho-sugar transferases
LOC111372586	605.298	0.467842	1.38304	0.131873	3.54766	0.000388673	0.000972216	XP_022850726.1	uncharacterized_LOC111372586	Olive
LOC111372603	1078.14	0.62969	1.54723	0.121762	5.17146	2.32e-07	8.71e-07	XP_022850742.1	SNF1-related_protein_kinase_catalytic_subunit_alpha_KIN10	Olive	PF02149:Kinase_associated_domain_1//PF00069:Protein_kinase_domain//PF00627:UBA/TS-N_domain	IPR002942:RNA-binding S4 domain
LOC111372605	149.759	1.56989	2.96881	0.245154	6.40368	1.52e-10	7.55e-10	XP_022850745.1	lamin-like_protein,_transcript_variant_X2	Olive	PF02298:Plastocyanin-like_domain	IPR003377:Cornichon
LOC111372606	431.832	1.1562	2.2287	0.15361	7.52685	5.2e-14	3.27e-13	XP_022850746.1	chorismate_mutase_1,_chloroplastic-like	Olive		IPR029413:Rhamnogalacturonan lyase, domain II//IPR008979:Galactose-binding-like domain superfamily//IPR013784:Carbohydrate-binding-like fold
LOC111372613	56.8423	1.26687	2.40639	0.391521	3.23577	0.00121315	0.00280737	XP_022850764.1	pentatricopeptide_repeat-containing_protein_At5g39350	Olive	PF01535:PPR_repeat//PF13041:PPR_repeat_family	IPR035984:Acyl-CoA binding protein superfamily//IPR015915:Kelch-type beta propeller//IPR006652:Kelch repeat type 1//IPR014352:FERM/acyl-CoA-binding protein superfamily//IPR000582:Acyl-CoA-binding protein, ACBP
LOC111372638	614.534	0.769381	1.70454	0.16149	4.76427	1.9e-06	6.46e-06	XP_022850790.1	probable_fructokinase-6,_chloroplastic	Olive	PF00294:pfkB_family_carbohydrate_kinase
LOC111372640	982.068	0.282513	1.21631	0.128079	2.20577	0.0274003	0.0487256	XP_022850792.1	receptor-like_protein_kinase_FERONIA	Olive	PF12819:Malectin-like_domain	IPR032675:Leucine-rich repeat domain superfamily//IPR027417:P-loop containing nucleoside triphosphate hydrolase
LOC111372641	76.699	0.873767	1.83244	0.312945	2.79208	0.00523702	0.0108673		uncharacterized_LOC111372641,_transcript_variant_X2	Olive
LOC111372649	126.359	1.3622	2.57077	0.259925	5.24074	1.6e-07	6.09e-07	XP_022850796.1	uncharacterized_LOC111372649	Olive	PF13650:Aspartyl_protease	IPR035595:UDP-glycosyltransferase family, conserved site
LOC111372651	332.651	1.1427	2.20794	0.172383	6.62885	3.38e-11	1.77e-10		NAP1-related_protein_2-like	Olive		IPR016140:Bifunctional inhibitor/plant lipid transfer protein/seed storage helical domain//IPR000617:Napin/ Bra allergen//IPR036312:Bifunctional inhibitor/plant lipid transfer protein/seed storage helical domain superfamily
LOC111372672	227.151	1.14307	2.2085	0.197318	5.79303	6.91e-09	3.01e-08	XP_022850820.1	ankyrin_repeat_and_SOCS_box_protein_9-like,_transcript_variant_X2	Olive	PF12796:Ankyrin_repeats_(3_copies)	IPR002048:EF-hand domain//IPR011992:EF-hand domain pair//IPR018247:EF-Hand 1, calcium-binding site
LOC111372677	236.141	0.572871	1.48748	0.190857	3.00158	0.00268584	0.00586237	XP_022850826.1	uncharacterized_LOC111372677	Olive		IPR011331:Ribosomal protein L37ae/L37e//IPR002674:Ribosomal protein L37ae//IPR011332:Zinc-binding ribosomal protein
LOC111372680	518.768	0.749646	1.68138	0.228751	3.27713	0.00104867	0.00245102	XP_022850832.1	probable_starch_synthase_4,_chloroplastic/amyloplastic,_transcript_variant_X5	Olive	PF00534:Glycosyl_transferases_group_1//PF08323:Starch_synthase_catalytic_domain	IPR017438:Inorganic polyphosphate/ATP-NAD kinase, N-terminal//IPR001206:Diacylglycerol kinase, catalytic domain//IPR016064:NAD kinase/diacylglycerol kinase-like domain superfamily
LOC111372682	212.376	2.68763	6.44256	0.228144	11.7804	4.92e-32	7.03e-31	XP_022850834.1	TORTIFOLIA1-like_protein_2,_transcript_variant_X2	Olive	PF02985:HEAT_repeat	IPR000668:Peptidase C1A, papain C-terminal//IPR013201:Cathepsin propeptide inhibitor domain (I29)//IPR025661:Cysteine peptidase, asparagine active site//IPR000169:Cysteine peptidase, cysteine active site//IPR039417:Papain-like cysteine endopeptidase//IPR025660:Cysteine peptidase, histidine active site//IPR038765:Papain-like cysteine peptidase superfamily
LOC111372684	331.897	0.808977	1.75197	0.235995	3.42794	0.000608186	0.00147678	XP_022850840.1	cycloartenol_synthase_2-like,_transcript_variant_X4	Olive	PF13243:Squalene-hopene_cyclase_C-terminal_domain//PF13249:Squalene-hopene_cyclase_N-terminal_domain	IPR006620:Prolyl 4-hydroxylase, alpha subunit//IPR005123:Oxoglutarate/iron-dependent dioxygenase
LOC111372690	387.033	0.884411	1.84601	0.183558	4.81815	1.45e-06	5e-06	XP_022850845.1	isoamylase_1,_chloroplastic	Olive	PF02922:Carbohydrate-binding_module_48_(Isoamylase_N-terminal_domain)//PF00128:Alpha_amylase,_catalytic_domain
LOC111372712	713.114	2.00297	4.00825	0.15513	12.9115	3.87e-38	6.65e-37		14-3-3-like_protein_D	Olive
LOC111372717	348.23	0.794298	1.73423	0.191733	4.14272	3.43e-05	9.97e-05			Olive		IPR002641:Patatin-like phospholipase domain//IPR016035:Acyl transferase/acyl hydrolase/lysophospholipase
LOC111372725	2306.86	4.63201	24.7955	0.138337	33.4835	8.37e-246	3.8e-243	XP_022850879.1	chlorophyll_a-b_binding_protein_21,_chloroplastic	Olive	PF00504:Chlorophyll_A-B_binding_protein	IPR036322:WD40-repeat-containing domain superfamily//IPR017986:WD40-repeat-containing domain//IPR015943:WD40/YVTN repeat-like-containing domain superfamily//IPR019775:WD40 repeat, conserved site//IPR001680:WD40 repeat
LOC111372726	121.038	0.803326	1.74512	0.307171	2.61524	0.00891658	0.0177199	XP_022850885.1	DNA-directed_RNA_polymerases_I_and_III_subunit_RPAC2-like,_transcript_variant_X9	Olive	PF13656:RNA_polymerase_Rpb3/Rpb11_dimerisation_domain	IPR032675:Leucine-rich repeat domain superfamily//IPR027417:P-loop containing nucleoside triphosphate hydrolase//IPR038005:Virus X resistance protein-like, coiled-coil domain//IPR036388:Winged helix-like DNA-binding domain superfamily
LOC111372733	54.748	3.55743	11.7731	0.498171	7.14099	9.27e-13	5.38e-12	XP_022850892.1	exonuclease_1	Olive	PF00752:XPG_N-terminal_domain//PF00867:XPG_I-region	IPR002173:Carbohydrate/purine kinase, PfkB, conserved site//IPR029056:Ribokinase-like//IPR002139:Ribokinase/fructokinase
LOC111372735	811.935	0.915142	1.88575	0.144669	6.32575	2.52e-10	1.23e-09	XP_022850894.1	ATP_synthase_delta_chain,_chloroplastic	Olive	PF00213:ATP_synthase_delta_(OSCP)_subunit	IPR025761:FFD box//IPR025768:TFG box//IPR019050:FDF domain//IPR025609:Lsm14-like, N-terminal//IPR010920:LSM domain superfamily//IPR025762:DFDF domain
LOC111372737	1027.97	0.605247	1.52124	0.133312	4.54009	5.62e-06	1.8e-05	XP_022850896.1	GDSL_esterase/lipase_At1g29670-like	Olive	PF00657:GDSL-like_Lipase/Acylhydrolase	IPR009072:Histone-fold
LOC111372743	99.611	1.30051	2.46316	0.311462	4.1755	2.97e-05	8.69e-05	XP_022850903.1	protein_LIGHT-DEPENDENT_SHORT_HYPOCOTYLS_10-like	Olive	PF04852:Protein_of_unknown_function_(DUF640)
LOC111372745	1908.95	0.566409	1.48083	0.124828	4.53752	5.69e-06	1.82e-05	XP_022850905.1	UBP1-associated_protein_2C-like	Olive	PF00076:RNA_recognition_motif._(a.k.a._RRM,_RBD,_or_RNP_domain)
LOC111372746	598.661	1.29825	2.45931	0.136309	9.52434	1.66e-21	1.55e-20	XP_022850906.1	50S_ribosomal_protein_L34,_chloroplastic	Olive	PF00468:Ribosomal_protein_L34
LOC111372749	247.301	1.66226	3.16512	0.192569	8.63203	6.03e-18	4.73e-17	XP_022850910.1	uncharacterized_LOC111372749,_transcript_variant_X2	Olive
LOC111372764	911.929	0.398897	1.3185	0.168713	2.36435	0.0180616	0.0335449	XP_022850927.1	glyoxysomal_fatty_acid_beta-oxidation_multifunctional_protein_MFP-a-like,_transcript_variant_X2	Olive	PF00725:3-hydroxyacyl-CoA_dehydrogenase,_C-terminal_domain//PF00378:Enoyl-CoA_hydratase/isomerase//PF02737:3-hydroxyacyl-CoA_dehydrogenase,_NAD_binding_domain	IPR036388:Winged helix-like DNA-binding domain superfamily
LOC111372769	58.6815	0.88258	1.84367	0.376814	2.34222	0.0191696	0.0354109	XP_022850931.1	inactive_protein_kinase_SELMODRAFT_444075-like	Olive	PF07714:Protein_tyrosine_kinase	IPR002842:V-type ATPase subunit E//IPR038495:V-type ATPase subunit E, C-terminal domain superfamily
LOC111372770	155.211	1.57511	2.97958	0.282942	5.5669	2.59e-08	1.07e-07	XP_022850934.1	putative_pentatricopeptide_repeat-containing_protein_At2g02150,_transcript_variant_X3	Olive	PF01535:PPR_repeat//PF13041:PPR_repeat_family//PF12854:PPR_repeat
LOC111372772	204.542	1.77797	3.42944	0.213636	8.32243	8.62e-17	6.38e-16	XP_022850935.1	inactive_leucine-rich_repeat_receptor-like_serine/threonine-protein_kinase_At1g60630	Olive	PF00069:Protein_kinase_domain
LOC111372778	79.4038	1.24913	2.37698	0.310756	4.01965	5.83e-05	0.000164211	XP_022850951.1	protein_indeterminate-domain_5,_chloroplastic-like,_transcript_variant_X3	Olive		IPR027443:Isopenicillin N synthase-like//IPR005123:Oxoglutarate/iron-dependent dioxygenase
LOC111372781	171.327	0.793343	1.73309	0.259877	3.05277	0.00226743	0.00501387	XP_022850957.1	protein_ACCUMULATION_AND_REPLICATION_OF_CHLOROPLASTS_3,_transcript_variant_X3	Olive		IPR002498:Phosphatidylinositol-4-phosphate 5-kinase, core//IPR027483:Phosphatidylinositol-4-phosphate 5-kinase, C-terminal//IPR003409:MORN motif//IPR027484:Phosphatidylinositol-4-phosphate 5-kinase, N-terminal
LOC111372782	630.277	1.28867	2.44302	0.271847	4.74041	2.13e-06	7.23e-06		protein_SGT1_homolog_B-like	Olive		IPR020892:Cyclophilin-type peptidyl-prolyl cis-trans isomerase, conserved site//IPR002130:Cyclophilin-type peptidyl-prolyl cis-trans isomerase domain//IPR024936:Cyclophilin-type peptidyl-prolyl cis-trans isomerase//IPR029000:Cyclophilin-like domain superfamily
LOC111372790	390.377	0.436524	1.35334	0.189201	2.30719	0.0210442	0.0385457	XP_022850965.1	uncharacterized_LOC111372790,_transcript_variant_X3	Olive	PF11145:Protein_of_unknown_function_(DUF2921)	IPR015500:Peptidase S8, subtilisin-related//IPR036852:Peptidase S8/S53 domain superfamily//IPR037045:Peptidase S8 propeptide/proteinase inhibitor I9 superfamily//IPR034197:Cucumisin-like catalytic domain//IPR023828:Peptidase S8, subtilisin, Ser-active site
LOC111372791	77.4619	0.928763	1.90364	0.330355	2.81141	0.00493247	0.0102886	XP_022850966.1	uncharacterized_LOC111372791	Olive	PF11145:Protein_of_unknown_function_(DUF2921)
LOC111372809	1132.94	2.07634	4.21736	0.142006	14.6215	2.05e-48	4.76e-47	XP_022850982.1	protein_indeterminate-domain_9-like,_transcript_variant_X4	Olive	PF12171:Zinc-finger_double-stranded_RNA-binding	IPR036291:NAD(P)-binding domain superfamily
LOC111372810	124.7	2.54218	5.82469	0.305111	8.33199	7.95e-17	5.89e-16	XP_022850983.1	fasciclin-like_arabinogalactan_protein_11	Olive	PF02469:Fasciclin_domain
LOC111372811	2757.88	1.72433	3.30426	0.120754	14.2797	2.93e-46	6.43e-45	XP_022850984.1	uncharacterized_LOC111372811	Olive	PF08241:Methyltransferase_domain	IPR027417:P-loop containing nucleoside triphosphate hydrolase//IPR038005:Virus X resistance protein-like, coiled-coil domain//IPR032675:Leucine-rich repeat domain superfamily
LOC111372817	65.5405	0.884008	1.84549	0.374707	2.3592	0.0183145	0.0339695	XP_022850992.1	uncharacterized_LOC111372817	Olive	PF04520:Senescence_regulator	IPR036388:Winged helix-like DNA-binding domain superfamily//IPR036390:Winged helix DNA-binding domain superfamily//IPR003316:E2F/DP family, winged-helix DNA-binding domain
LOC111372819	215.907	1.75044	3.36462	0.227666	7.68866	1.49e-14	9.7e-14	XP_022850997.1	GATA_transcription_factor_11-like,_transcript_variant_X2	Olive	PF00320:GATA_zinc_finger	IPR000719:Protein kinase domain//IPR008271:Serine/threonine-protein kinase, active site//IPR000270:PB1 domain//IPR017441:Protein kinase, ATP binding site//IPR011009:Protein kinase-like domain superfamily//IPR001245:Serine-threonine/tyrosine-protein kinase, catalytic domain
LOC111372821	172.453	1.26445	2.40235	0.224933	5.62145	1.89e-08	7.92e-08		uncharacterized_LOC111372821	Olive
LOC111372824	57.9884	3.2161	9.29274	0.480558	6.69244	2.19e-11	1.16e-10	XP_022851009.1	receptor-like_serine/threonine-protein_kinase_NCRK,_transcript_variant_X6	Olive	PF00069:Protein_kinase_domain	IPR029039:Flavoprotein-like superfamily//IPR008254:Flavodoxin/nitric oxide synthase//IPR010089:Flavoprotein WrbA-like
LOC111372826	300.275	1.29685	2.45692	0.218312	5.94034	2.84e-09	1.28e-08			Olive
LOC111372846	137.365	1.28386	2.4349	0.304458	4.21688	2.48e-05	7.32e-05	XP_022851030.1	uracil_phosphoribosyltransferase-like,_transcript_variant_X2	Olive	PF14681:Uracil_phosphoribosyltransferase	IPR024185:5-formyltetrahydrofolate cyclo-ligase-like domain superfamily//IPR037171:NagB/RpiA transferase-like
LOC111372857	82.2223	2.04096	4.1152	0.33821	6.0346	1.59e-09	7.33e-09	XP_022851039.1	protein_trichome_birefringence-like_33	Olive	PF13839:GDSL/SGNH-like_Acyl-Esterase_family_found_in_Pmr5_and_Cas1p//PF14416:PMR5_N_terminal_Domain
LOC111372860	421.946	0.434147	1.35111	0.156881	2.76737	0.00565108	0.0116489	XP_022851042.1	calcium_homeostasis_endoplasmic_reticulum_protein-like,_transcript_variant_X2	Olive	PF01805:Surp_module//PF04818:RNA_polymerase_II-binding_domain.	IPR020902:Actin/actin-like conserved site//IPR004001:Actin, conserved site//IPR004000:Actin family//IPR043129:ATPase, nucleotide binding domain
LOC111372866	345.235	1.98132	3.94853	0.195733	10.1226	4.39e-24	4.58e-23	XP_022851047.1	elongation_factor_Tu,_mitochondrial-like,_transcript_variant_X2	Olive	PF03143:Elongation_factor_Tu_C-terminal_domain//PF03144:Elongation_factor_Tu_domain_2//PF00009:Elongation_factor_Tu_GTP_binding_domain
LOC111372870	405.185	0.697441	1.62163	0.168884	4.1297	3.63e-05	0.000105192	XP_022851054.1	sugar_transporter_ERD6-like_7,_transcript_variant_X3	Olive	PF00083:Sugar_(and_other)_transporter	IPR000547:Clathrin, heavy chain/VPS, 7-fold repeat//IPR016025:Clathrin heavy chain, N-terminal//IPR016024:Armadillo-type fold//IPR011990:Tetratricopeptide-like helical domain superfamily//IPR016341:Clathrin, heavy chain
LOC111372874	590.562	0.56105	1.47534	0.136169	4.12026	3.78e-05	0.000109307	XP_022851058.1	probable_LRR_receptor-like_serine/threonine-protein_kinase_RKF3,_transcript_variant_X2	Olive	PF00069:Protein_kinase_domain
LOC111372875	150.81	1.21123	2.31535	0.236455	5.12246	3.02e-07	1.12e-06	XP_022851063.1	receptor-like_cytosolic_serine/threonine-protein_kinase_RBK2,_transcript_variant_X5	Olive	PF00069:Protein_kinase_domain
LOC111372878	130.333	1.36174	2.56995	0.247134	5.51011	3.59e-08	1.46e-07	XP_022851067.1	probable_leucine-rich_repeat_receptor-like_protein_kinase_At1g35710	Olive	PF00560:Leucine_Rich_Repeat//PF13516:Leucine_Rich_repeat//PF08263:Leucine_rich_repeat_N-terminal_domain	IPR013087:Zinc finger C2H2-type//IPR036236:Zinc finger C2H2 superfamily
LOC111372879	210.85	0.788687	1.7275	0.211618	3.72694	0.000193822	0.000507389	XP_022851068.1	protein_tas-like	Olive	PF00248:Aldo/keto_reductase_family
LOC111372888	86.6407	2.92123	7.57493	0.363505	8.03629	9.26e-16	6.46e-15		uncharacterized_protein_LOC111372888	Olive		IPR002401:Cytochrome P450, E-class, group I//IPR036396:Cytochrome P450 superfamily//IPR017972:Cytochrome P450, conserved site//IPR001128:Cytochrome P450
LOC111372903	64.509	2.27436	4.83783	0.440892	5.15854	2.49e-07	9.31e-07	XP_022851095.1	BTB/POZ_domain-containing_protein_NPY1-like	Olive	PF03000:NPH3_family	IPR005045:CDC50/LEM3 family
LOC111372905	411.65	0.844062	1.7951	0.152576	5.53206	3.16e-08	1.3e-07	XP_022851101.1	uncharacterized_LOC111372905	Olive
LOC111372909	465.472	2.81747	7.04924	0.169603	16.6121	5.7e-62	1.82e-60	XP_022851102.1	early_nodulin-like_protein_1	Olive	PF02298:Plastocyanin-like_domain	IPR037256:ASC domain superfamily//IPR006828:Association with the SNF1 complex (ASC) domain
LOC111372910	122.893	0.944508	1.92453	0.258795	3.64963	0.000262617	0.000673844	XP_022851103.1	pentatricopeptide_repeat-containing_protein_At4g31850,_chloroplastic	Olive	PF01535:PPR_repeat//PF13041:PPR_repeat_family//PF12854:PPR_repeat//PF13812:Pentatricopeptide_repeat_domain
LOC111372921	275.285	0.478365	1.39316	0.194672	2.45729	0.0139991	0.0266851	XP_022851117.1	copper-transporting_ATPase_PAA2,_chloroplastic-like	Olive	PF00403:Heavy-metal-associated_domain
LOC111372929	202.044	1.06099	2.08636	0.249844	4.24661	2.17e-05	6.46e-05	XP_022851124.1	kinetochore_protein_spc25	Olive	PF08234:Chromosome_segregation_protein_Spc25
LOC111372930	319.094	0.955154	1.93879	0.171195	5.57932	2.41e-08	9.99e-08	XP_022851125.1	purine_permease_3-like	Olive	PF16913:Purine_nucleobase_transmembrane_transport	IPR000408:Regulator of chromosome condensation, RCC1//IPR009091:Regulator of chromosome condensation 1/beta-lactamase-inhibitor protein II
LOC111372932	177.342	0.603627	1.51953	0.226523	2.66475	0.00770449	0.0154822	XP_022851128.1	vacuolar_protein_sorting-associated_protein_18_homolog,_transcript_variant_X2	Olive	PF00637:Region_in_Clathrin_and_VPS//PF05131:Pep3/Vps18/deep_orange_family
LOC111372934	1357.42	1.57931	2.98826	0.166439	9.48881	2.34e-21	2.16e-20	XP_022851130.1	probable_(S)-N-methylcoclaurine_3'-hydroxylase_isozyme_2	Olive	PF00067:Cytochrome_P450	IPR001179:FKBP-type peptidyl-prolyl cis-trans isomerase domain
LOC111372935	2198.27	0.959794	1.94503	0.205674	4.66659	3.06e-06	1.01e-05	XP_022851131.1	60S_acidic_ribosomal_protein_P0	Olive	PF17777:Insertion_domain_in_60S_ribosomal_protein_L10P//PF00428:60s_Acidic_ribosomal_protein	IPR016159:Cullin repeat-like-containing domain superfamily
LOC111372942	6387.25	1.2476	2.37446	0.0981538	12.7107	5.16e-37	8.54e-36	XP_022851141.1	probable_6-phosphogluconolactonase_5,_chloroplastic	Olive	PF01182:Glucosamine-6-phosphate_isomerases/6-phosphogluconolactonase	IPR011993:PH-like domain superfamily//IPR004182:GRAM domain
LOC111372952	145.77	1.12496	2.18095	0.234255	4.80227	1.57e-06	5.4e-06	XP_022851152.1	zinc_finger_MYM-type_protein_1-like,_transcript_variant_X2	Olive	PF14291:Domain_of_unknown_function_(DUF4371)	IPR037219:Peptidase M41-like//IPR003960:ATPase, AAA-type, conserved site//IPR003593:AAA+ ATPase domain//IPR027417:P-loop containing nucleoside triphosphate hydrolase
LOC111372954	133.939	0.832191	1.78039	0.235702	3.53069	0.000414479	0.00103163	XP_022851154.1	nuclear_pore_complex_protein_NUP35	Olive	PF05172:Nup53/35/40-type_RNA_recognition_motif
LOC111372961	53.0108	1.63241	3.10031	0.406956	4.01128	6.04e-05	0.000169903	XP_022851164.1	SPX_domain-containing_membrane_protein_At4g22990-like,_transcript_variant_X4	Olive	PF07690:Major_Facilitator_Superfamily//PF03105:SPX_domain
LOC111372968	370.181	0.684022	1.60661	0.163479	4.18416	2.86e-05	8.39e-05	XP_022851177.1	nudix_hydrolase_14,_chloroplastic	Olive	PF00293:NUDIX_domain
LOC111372978	318.575	0.53177	1.4457	0.179218	2.96717	0.00300554	0.00649899		uncharacterized_protein_LOC111372978	Olive
LOC111372989	477.632	0.783277	1.72104	0.148443	5.27662	1.32e-07	5.06e-07	XP_022851196.1	60S_ribosomal_protein_L27-3-like	Olive	PF01777:Ribosomal_L27e_protein_family	IPR036758:At5g01610-like superfamily
LOC111372990	347.764	1.02258	2.03154	0.225383	4.53705	5.7e-06	1.83e-05	XP_022851197.1	porphobilinogen_deaminase,_chloroplastic-like	Olive	PF01379:Porphobilinogen_deaminase,_dipyromethane_cofactor_binding_domain	IPR036758:At5g01610-like superfamily
LOC111372992	775.39	1.102	2.14651	0.126384	8.71942	2.8e-18	2.23e-17	XP_022851198.1	probable_BOI-related_E3_ubiquitin-protein_ligase_3	Olive	PF13920:Zinc_finger,_C3HC4_type_(RING_finger)	IPR005716:Ribosomal protein S5/S7, eukaryotic/archaeal//IPR020606:Ribosomal protein S7, conserved site//IPR036823:Ribosomal protein S7 domain superfamily//IPR000235:Ribosomal protein S5/S7
LOC111372996	147.287	0.729099	1.6576	0.223761	3.25839	0.00112048	0.00260735	XP_022851210.1	probable_LRR_receptor-like_serine/threonine-protein_kinase_At1g56140,_transcript_variant_X4	Olive	PF07714:Protein_tyrosine_kinase//PF11721:Malectin_domain
LOC111373013	957.981	0.56372	1.47808	0.207599	2.71543	0.00661904	0.0134749	XP_022851232.1	26S_proteasome_non-ATPase_regulatory_subunit_12_homolog_A-like,_transcript_variant_X2	Olive	PF01399:PCI_domain	IPR016024:Armadillo-type fold
LOC111373014	297.488	0.82173	1.76752	0.225815	3.63896	0.000273746	0.000700796	XP_022851233.1	ribonucleoside-diphosphate_reductase_large_subunit-like	Olive	PF00317:Ribonucleotide_reductase,_all-alpha_domain//PF02867:Ribonucleotide_reductase,_barrel_domain//PF03477:ATP_cone_domain	IPR032675:Leucine-rich repeat domain superfamily
LOC111373016	491.091	0.540276	1.45425	0.166914	3.23686	0.00120855	0.00279729	XP_022851235.1	probable_carboxylesterase_2	Olive	PF07859:alpha/beta_hydrolase_fold	IPR008978:HSP20-like chaperone
LOC111373025	713.518	0.620844	1.53777	0.143389	4.3298	1.49e-05	4.53e-05	XP_022851247.1	phosphoglucan,_water_dikinase,_chloroplastic,_transcript_variant_X2	Olive	PF00686:Starch_binding_domain//PF01326:Pyruvate_phosphate_dikinase,_PEP/pyruvate_binding_domain	IPR036400:Cytochrome b5-like heme/steroid binding domain superfamily//IPR001199:Cytochrome b5-like heme/steroid binding domain
LOC111373032	289.071	2.07065	4.20076	0.227643	9.09604	9.37e-20	8.06e-19	XP_022851253.1	protein_arginine_N-methyltransferase_1.5-like,_transcript_variant_X2	Olive	PF05185:PRMT5_arginine-N-methyltransferase//PF17286:PRMT5_oligomerisation_domain//PF17285:PRMT5_TIM_barrel_domain	IPR016024:Armadillo-type fold//IPR011989:Armadillo-like helical
LOC111373038	281.03	1.05634	2.07965	0.276882	3.81513	0.00013611	0.000363902	XP_022851266.1	LRR_receptor-like_serine/threonine-protein_kinase_FEI_2,_transcript_variant_X5	Olive	PF08263:Leucine_rich_repeat_N-terminal_domain
LOC111373041	136.705	1.47097	2.77208	0.286886	5.12737	2.94e-07	1.09e-06		histidinol-phosphate_aminotransferase,_chloroplastic-like	Olive
LOC111373043	430.894	1.00243	2.00337	0.164847	6.08095	1.19e-09	5.54e-09	XP_022851271.1	phosphoribulokinase,_chloroplastic-like	Olive	PF00485:Phosphoribulokinase_/_Uridine_kinase_family	IPR001841:Zinc finger, RING-type//IPR013083:Zinc finger, RING/FYVE/PHD-type
LOC111373048	302.98	1.1973	2.29311	0.187032	6.40159	1.54e-10	7.65e-10	XP_022851276.1	uncharacterized_LOC111373048,_transcript_variant_X2	Olive	PF14360:PAP2_superfamily_C-terminal
LOC111373049	85.4419	0.922325	1.89517	0.307673	2.99774	0.0027199	0.00592863	XP_022851283.1	5-formyltetrahydrofolate_cyclo-ligase-like_protein_COG0212,_transcript_variant_X6	Olive	PF01812:5-formyltetrahydrofolate_cyclo-ligase_family
LOC111373051	116.663	0.985741	1.98033	0.262716	3.75212	0.000175346	0.000461791	XP_022851287.1	protein_S-acyltransferase_8-like,_transcript_variant_X3	Olive	PF01529:DHHC_palmitoyltransferase
LOC111373053	275.661	0.454178	1.37	0.203057	2.2367	0.025306	0.0454095	XP_022851288.1	uncharacterized_LOC111373053	Olive		IPR036576:WRKY domain superfamily//IPR003657:WRKY domain
LOC111373056	124.588	0.788396	1.72715	0.246884	3.19339	0.00140615	0.00321856	XP_022851294.1	tryptophan_aminotransferase-related_protein_4-like	Olive	PF04863:Alliinase_EGF-like_domain//PF04864:Allinase
LOC111373057	69.3658	0.927397	1.90184	0.323366	2.86795	0.00413142	0.00872707		uncharacterized_LOC111373057	Olive		IPR033640:Fatty acyl-CoA reductase, C-terminal//IPR036291:NAD(P)-binding domain superfamily
LOC111373058	157.592	1.27928	2.42718	0.254757	5.02158	5.12e-07	1.86e-06	XP_022851298.1	S-adenosylmethionine_carrier_1,_chloroplastic/mitochondrial-like,_transcript_variant_X4	Olive	PF00153:Mitochondrial_carrier_protein	IPR003954:RNA recognition motif domain, eukaryote//IPR012677:Nucleotide-binding alpha-beta plait domain superfamily//IPR000504:RNA recognition motif domain//IPR034392:TatSF1-like, RNA recognition motif 1//IPR035445:GYF-like domain superfamily//IPR035979:RNA-binding domain superfamily
LOC111373082	527.129	0.513732	1.42774	0.136027	3.7767	0.000158922	0.000421142	XP_022851319.1	probable_inactive_receptor_kinase_At5g10020	Olive	PF13855:Leucine_rich_repeat//PF08263:Leucine_rich_repeat_N-terminal_domain//PF00069:Protein_kinase_domain	IPR009053:Prefoldin
LOC111373097	231.212	0.45889	1.37448	0.183848	2.49603	0.0125592	0.0241788		SWI/SNF-related_matrix-associated_actin-dependent_regulator_of_chromatin_subfamily_A-like_protein_1_homolog	Olive
LOC111373100	614.172	0.705581	1.6308	0.142449	4.95323	7.3e-07	2.6e-06	XP_022851347.1	probable_GTP_diphosphokinase_CRSH,_chloroplastic	Olive	PF13328:HD_domain//PF04607:Region_found_in_RelA_/_SpoT_proteins//PF13499:EF-hand_domain_pair
LOC111373102	625.371	0.37309	1.29512	0.129305	2.88535	0.00390983	0.00829129	XP_022851352.1	protein_TRIGALACTOSYLDIACYLGLYCEROL_4,_chloroplastic-like,_transcript_variant_X3	Olive		IPR002885:Pentatricopeptide repeat//IPR011990:Tetratricopeptide-like helical domain superfamily
LOC111373103	409.841	1.55423	2.93677	0.189014	8.22282	1.99e-16	1.44e-15	XP_022851353.1	5'-nucleotidase_domain-containing_protein_4	Olive	PF05761:5'_nucleotidase_family
LOC111373129	225.921	0.606259	1.52231	0.208156	2.91252	0.00358523	0.00765312	XP_022851378.1	NAC_domain-containing_protein_60-like	Olive	PF02365:No_apical_meristem_(NAM)_protein	IPR017972:Cytochrome P450, conserved site//IPR002401:Cytochrome P450, E-class, group I//IPR036396:Cytochrome P450 superfamily//IPR001128:Cytochrome P450
LOC111373132	293.329	1.48344	2.79614	0.190469	7.78834	6.79e-15	4.52e-14	XP_022851382.1	uncharacterized_protein_At5g41620-like	Olive		IPR008978:HSP20-like chaperone//IPR007052:CS domain
LOC111373133	947.779	1.41561	2.66773	0.247663	5.71589	1.09e-08	4.67e-08	XP_022851383.1	photosystem_I_subunit_O	Olive
LOC111373140	7482.08	2.62211	6.15648	0.163936	15.9947	1.39e-57	4.05e-56	XP_022851388.1	uncharacterized_LOC111373140	Olive	PF01190:Pollen_proteins_Ole_e_I_like	IPR008832:Signal recognition particle, SRP9 subunit//IPR009018:Signal recognition particle, SRP9/SRP14 subunit
LOC111373141	151.997	1.13219	2.1919	0.227472	4.97725	6.45e-07	2.31e-06	XP_022851390.1	uncharacterized_LOC111373141	Olive	PF04520:Senescence_regulator	IPR036291:NAD(P)-binding domain superfamily
LOC111373144	1879.08	0.49184	1.40624	0.147932	3.32476	0.000884931	0.00209644	XP_022851394.1	heterogeneous_nuclear_ribonucleoprotein_Q-like,_transcript_variant_X3	Olive	PF00076:RNA_recognition_motif._(a.k.a._RRM,_RBD,_or_RNP_domain)	IPR002048:EF-hand domain//IPR035595:UDP-glycosyltransferase family, conserved site//IPR002999:Tudor domain
LOC111373148	331.045	1.19191	2.28455	0.170858	6.97603	3.04e-12	1.71e-11	XP_022851398.1	transmembrane_9_superfamily_member_5	Olive	PF02990:Endomembrane_protein_70
LOC111373160	450.537	0.447477	1.36365	0.155712	2.87375	0.00405627	0.00858127	XP_022851412.1	rho_GTPase-activating_protein_5-like	Olive	PF00620:RhoGAP_domain	IPR002885:Pentatricopeptide repeat//IPR011990:Tetratricopeptide-like helical domain superfamily
LOC111373193	113.317	0.829679	1.77729	0.264481	3.13701	0.00170683	0.00384811	XP_022851460.1	tRNA:m(4)X_modification_enzyme_TRM13_homolog	Olive	PF11722:CCCH_zinc_finger_in_TRM13_protein//PF05206:Methyltransferase_TRM13//PF05253:U11-48K-like_CHHC_zinc_finger	IPR001841:Zinc finger, RING-type//IPR013083:Zinc finger, RING/FYVE/PHD-type
LOC111373194	1939.08	0.621535	1.53851	0.113451	5.47843	4.29e-08	1.73e-07	XP_022851461.1	ubiquitin-40S_ribosomal_protein_S27a	Olive	PF00240:Ubiquitin_family//PF01599:Ribosomal_protein_S27a	IPR003593:AAA+ ATPase domain//IPR017871:ABC transporter, conserved site//IPR027417:P-loop containing nucleoside triphosphate hydrolase//IPR003439:ABC transporter-like
LOC111373206	236.797	0.987177	1.9823	0.217537	4.53797	5.68e-06	1.82e-05	XP_022851478.1	CRM-domain_containing_factor_CFM3A,_chloroplastic/mitochondrial-like	Olive	PF01985:CRS1_/_YhbY_(CRM)_domain	IPR011990:Tetratricopeptide-like helical domain superfamily//IPR011333:SKP1/BTB/POZ domain superfamily//IPR019734:Tetratricopeptide repeat
LOC111373207	633.744	0.941588	1.92064	0.259634	3.62661	0.000287171	0.000733156	XP_022851482.1	phosphatidate_cytidylyltransferase_1-like,_transcript_variant_X4	Olive	PF01148:Cytidylyltransferase_family	IPR026243:HAUS augmin-like complex subunit 1
LOC111373211	129.92	1.14746	2.21524	0.272574	4.20972	2.56e-05	7.55e-05		uncharacterized_LOC111373211	Olive		IPR001841:Zinc finger, RING-type//IPR013083:Zinc finger, RING/FYVE/PHD-type
LOC111373217	1400.22	0.476767	1.39162	0.12575	3.79139	0.000149808	0.00039818	XP_022851488.1	pyruvate_kinase_isozyme_A,_chloroplastic	Olive	PF02887:Pyruvate_kinase,_alpha/beta_domain//PF00224:Pyruvate_kinase,_barrel_domain	IPR009060:UBA-like superfamily
LOC111373219	408.547	1.36345	2.57299	0.165926	8.2172	2.08e-16	1.51e-15	XP_022851491.1	histone_H4	Olive	PF15511:Centromere_kinetochore_component_CENP-T_histone_fold
LOC111373227	166.925	0.930636	1.90612	0.224462	4.14608	3.38e-05	9.83e-05	XP_022851502.1	importin-9	Olive	PF03810:Importin-beta_N-terminal_domain
LOC111373229	2068.37	0.493229	1.40759	0.10762	4.58305	4.58e-06	1.48e-05	XP_022851503.1	cryptochrome-1-like	Olive	PF12546:Blue/Ultraviolet_sensing_protein_C_terminal//PF03441:FAD_binding_domain_of_DNA_photolyase
LOC111373240	1917.56	0.424498	1.34211	0.133767	3.1734	0.00150662	0.00342823	XP_022851513.1	eukaryotic_translation_initiation_factor_3_subunit_B-like,_transcript_variant_X2	Olive	PF08662:Eukaryotic_translation_initiation_factor_eIF2A
LOC111373246	174.372	1.03777	2.05305	0.245416	4.2286	2.35e-05	6.97e-05	XP_022851521.1	dynamin-related_protein_1E-like	Olive	PF00350:Dynamin_family	IPR003615:HNH nuclease
LOC111373255	50.584	1.01603	2.02234	0.404636	2.51097	0.0120402	0.0232754	XP_022851531.1	uncharacterized_LOC111373255	Olive		IPR026939:ZNF706/At2g23090 superfamily
LOC111373261	145.448	3.38408	10.4402	0.331958	10.1943	2.1e-24	2.23e-23	XP_022851536.1	transcription_repressor_OFP7-like	Olive	PF04844:Transcriptional_repressor,_ovate	IPR013032:EGF-like, conserved site
LOC111373267	135.09	1.88393	3.69078	0.302484	6.22819	4.72e-10	2.26e-09	XP_022851540.1	thioredoxin-like_3-1,_chloroplastic	Olive	PF00085:Thioredoxin
LOC111373279	1036.6	0.437986	1.35471	0.123891	3.53527	0.000407361	0.00101526	XP_022851551.1	polypyrimidine_tract-binding_protein_homolog_3	Olive	PF00076:RNA_recognition_motif._(a.k.a._RRM,_RBD,_or_RNP_domain)//PF13893:RNA_recognition_motif._(a.k.a._RRM,_RBD,_or_RNP_domain)//PF11835:RRM-like_domain
LOC111373294	1266.26	0.336811	1.26296	0.131057	2.56995	0.0101712	0.0199539	XP_022851570.1	uncharacterized_protein_At5g39570-like	Olive		IPR000315:B-box-type zinc finger
LOC111373302	447.162	0.803327	1.74512	0.147071	5.46217	4.7e-08	1.89e-07	XP_022851579.1	uncharacterized_LOC111373302	Olive
LOC111373313	481.238	1.7754	3.42333	0.186534	9.51781	1.77e-21	1.64e-20	XP_022851592.1	serine_carboxypeptidase-like_45	Olive	PF00450:Serine_carboxypeptidase
LOC111373315	328.174	1.25144	2.38079	0.181077	6.91109	4.81e-12	2.67e-11	XP_022851594.1	coiled-coil_domain-containing_protein_SCD2	Olive		IPR036420:BRCT domain superfamily//IPR001357:BRCT domain//IPR001841:Zinc finger, RING-type//IPR017907:Zinc finger, RING-type, conserved site//IPR013083:Zinc finger, RING/FYVE/PHD-type//IPR034732:Extended PHD (ePHD) domain
LOC111373318	57.5391	2.6592	6.31685	0.463565	5.73643	9.67e-09	4.15e-08	XP_022851598.1	putative_pentatricopeptide_repeat-containing_protein_At5g13230,_mitochondrial	Olive	PF14432:DYW_family_of_nucleic_acid_deaminases//PF13041:PPR_repeat_family//PF01535:PPR_repeat	IPR036142:ENT domain-like superfamily//IPR005491:ENT domain
LOC111373339	252.906	0.860172	1.81525	0.19137	4.49481	6.96e-06	2.21e-05		6-phosphogluconate_dehydrogenase,_decarboxylating_2,_chloroplastic-like	Olive		IPR036259:MFS transporter superfamily
LOC111373356	168.897	5.09482	34.1738	0.422389	12.0619	1.68e-33	2.51e-32	XP_022851645.1	polygalacturonase-1_non-catalytic_subunit_beta-like	Olive	PF03181:BURP_domain	IPR004001:Actin, conserved site//IPR020902:Actin/actin-like conserved site//IPR004000:Actin family//IPR043129:ATPase, nucleotide binding domain
LOC111373363	350.14	0.504751	1.41888	0.182142	2.7712	0.00558504	0.0115262	XP_022851652.1	methyl-CpG-binding_domain-containing_protein_9-like	Olive	PF15613:Williams-Beuren_syndrome_DDT_(WSD),_D-TOX_E_motif//PF00439:Bromodomain//PF15612:WSTF,_HB1,_Itc1p,_MBD9_motif_1//PF00628:PHD-finger	IPR036615:Mur ligase, C-terminal domain superfamily
LOC111373377	121.904	1.17564	2.25893	0.283802	4.14248	3.44e-05	9.98e-05	XP_022851662.1	calmodulin-binding_protein_60_D-like,_transcript_variant_X2	Olive	PF07887:Calmodulin_binding_protein-like	IPR017441:Protein kinase, ATP binding site//IPR008271:Serine/threonine-protein kinase, active site//IPR032675:Leucine-rich repeat domain superfamily//IPR011009:Protein kinase-like domain superfamily//IPR000719:Protein kinase domain//IPR003591:Leucine-rich repeat, typical subtype
LOC111373379	573.775	1.01735	2.0242	0.233299	4.36071	1.3e-05	3.97e-05			Olive
LOC111373384	172.341	0.671276	1.59248	0.253232	2.65084	0.0080293	0.0160801	XP_022851674.1	pentatricopeptide_repeat-containing_protein_At1g01970,_transcript_variant_X2	Olive	PF01535:PPR_repeat//PF13812:Pentatricopeptide_repeat_domain
LOC111373385	188.011	2.1561	4.45707	0.249911	8.62744	6.27e-18	4.92e-17	XP_022851677.1	1,4-alpha-glucan-branching_enzyme_3,_chloroplastic/amyloplastic,_transcript_variant_X3	Olive	PF02806:Alpha_amylase,_C-terminal_all-beta_domain//PF00128:Alpha_amylase,_catalytic_domain//PF02922:Carbohydrate-binding_module_48_(Isoamylase_N-terminal_domain)	IPR036396:Cytochrome P450 superfamily//IPR002401:Cytochrome P450, E-class, group I//IPR017972:Cytochrome P450, conserved site//IPR001128:Cytochrome P450
LOC111373387	1086.05	0.358164	1.28179	0.114356	3.132	0.0017362	0.00391092	XP_022851680.1	4-hydroxy-tetrahydrodipicolinate_synthase,_chloroplastic-like	Olive	PF00701:Dihydrodipicolinate_synthetase_family	IPR015300:DNA-binding pseudobarrel domain superfamily//IPR003340:B3 DNA binding domain
LOC111373395	2044.1	0.639621	1.55792	0.135729	4.71249	2.45e-06	8.22e-06	XP_022851690.1	probable_cellulose_synthase_A_catalytic_subunit_1_[UDP-forming]	Olive	PF03552:Cellulose_synthase
LOC111373399	90.0288	1.72949	3.31611	0.310078	5.5776	2.44e-08	1.01e-07	XP_022851700.1	protein_WVD2-like_3	Olive	PF06886:Targeting_protein_for_Xklp2_(TPX2)	IPR027417:P-loop containing nucleoside triphosphate hydrolase
LOC111373403	57.6358	5.16619	35.9069	0.719269	7.18256	6.84e-13	4e-12	XP_022851712.1	auxin-induced_protein_22D-like	Olive	PF02309:AUX/IAA_family	IPR023210:NADP-dependent oxidoreductase domain//IPR036812:NADP-dependent oxidoreductase domain superfamily
LOC111373406	1571.64	2.39189	5.24846	0.149391	16.0109	1.07e-57	3.13e-56	XP_022851718.1	putative_ion_channel_POLLUX-like_2,_transcript_variant_X4	Olive	PF06241:Castor_and_Pollux,_part_of_voltage-gated_ion_channel	IPR000424:Primosome PriB/single-strand DNA-binding//IPR011344:Single-stranded DNA-binding protein//IPR012340:Nucleic acid-binding, OB-fold
LOC111373407	146.357	1.54319	2.91438	0.319551	4.82924	1.37e-06	4.74e-06		uncharacterized_LOC111373407	Olive		IPR017415:Putative RNA polymerase II transcriptional coactivator KELP//IPR009044:ssDNA-binding transcriptional regulator
LOC111373435	963.299	0.639241	1.55751	0.152594	4.18915	2.8e-05	8.22e-05			Olive		IPR029058:Alpha/Beta hydrolase fold
LOC111373450	252.428	3.33002	10.0562	0.23933	13.914	5.21e-44	1.07e-42	XP_022851749.1	L-ascorbate_oxidase_homolog	Olive	PF07732:Multicopper_oxidase//PF00394:Multicopper_oxidase//PF07731:Multicopper_oxidase
LOC111373453	94.7232	0.93649	1.91387	0.290486	3.22387	0.0012647	0.00291843	XP_022851755.1	uncharacterized_LOC111373453,_transcript_variant_X4	Olive	PF04784:Protein_of_unknown_function,_DUF547//PF14389:Leucine-zipper_of_ternary_complex_factor_MIP1	IPR027417:P-loop containing nucleoside triphosphate hydrolase//IPR013083:Zinc finger, RING/FYVE/PHD-type//IPR001752:Kinesin motor domain//IPR019821:Kinesin motor domain, conserved site//IPR036961:Kinesin motor domain superfamily//IPR001841:Zinc finger, RING-type
LOC111373457	368.053	0.512661	1.42668	0.16531	3.10121	0.00192735	0.00431118		uncharacterized_protein_LOC111373457	Olive		IPR003591:Leucine-rich repeat, typical subtype//IPR000719:Protein kinase domain//IPR032675:Leucine-rich repeat domain superfamily//IPR011009:Protein kinase-like domain superfamily
LOC111373460	157.519	1.56756	2.96403	0.235441	6.65798	2.78e-11	1.46e-10			Olive		IPR023213:Chloramphenicol acetyltransferase-like domain superfamily
LOC111373469	106.972	0.706213	1.63152	0.297889	2.37073	0.0177532	0.0330359			Olive		IPR033905:Secretory peroxidase//IPR019793:Peroxidases heam-ligand binding site//IPR000823:Plant peroxidase//IPR010255:Haem peroxidase superfamily//IPR002016:Haem peroxidase//IPR019794:Peroxidase, active site
LOC111373484	496.781	0.726564	1.65469	0.192583	3.77273	0.000161473	0.000427496	XP_022851785.1	serine/arginine-rich_splicing_factor_SR45-like	Olive	PF00076:RNA_recognition_motif._(a.k.a._RRM,_RBD,_or_RNP_domain)
LOC111373503	320.032	0.744715	1.67564	0.182465	4.08142	4.48e-05	0.000128094	XP_022851802.1	uncharacterized_LOC111373503	Olive		IPR038511:TAP42/TAP46-like superfamily
LOC111373507	72.829	1.6701	3.18236	0.329878	5.06277	4.13e-07	1.51e-06			Olive		IPR001471:AP2/ERF domain//IPR016177:DNA-binding domain superfamily//IPR036955:AP2/ERF domain superfamily
LOC111373511	7469.58	1.01612	2.02247	0.160668	6.32434	2.54e-10	1.24e-09	XP_022851815.1	5-methyltetrahydropteroyltriglutamate--homocysteine_methyltransferase-like	Olive	PF08267:Cobalamin-independent_synthase,_N-terminal_domain//PF01717:Cobalamin-independent_synthase,_Catalytic_domain	IPR013763:Cyclin-like//IPR036915:Cyclin-like superfamily//IPR006671:Cyclin, N-terminal
LOC111373517	196.204	1.11657	2.16831	0.228757	4.88105	1.06e-06	3.69e-06	XP_022851825.1	nucleolar_and_coiled-body_phosphoprotein_1-like,_transcript_variant_X7	Olive	PF05022:SRP40,_C-terminal_domain	IPR017946:PLC-like phosphodiesterase, TIM beta/alpha-barrel domain superfamily//IPR030395:Glycerophosphodiester phosphodiesterase domain
LOC111373542	450.334	0.726514	1.65464	0.172802	4.20431	2.62e-05	7.72e-05		probable_protein_phosphatase_2C_50	Olive
LOC111373545	52.5997	0.965512	1.95276	0.380726	2.53597	0.0112135	0.0218116	XP_022851856.1	pentatricopeptide_repeat-containing_protein_At2g17525,_mitochondrial	Olive	PF12854:PPR_repeat//PF13041:PPR_repeat_family//PF01535:PPR_repeat	IPR016135:Ubiquitin-conjugating enzyme/RWD-like//IPR006575:RWD domain
LOC111373549	267.35	2.08307	4.23708	0.192579	10.8167	2.87e-27	3.42e-26	XP_022851863.1	uncharacterized_LOC111373549	Olive		IPR006476:Conserved hypothetical protein CHP01589, plant
LOC111373553	755.02	1.15042	2.21979	0.131169	8.77054	1.78e-18	1.43e-17	XP_022851869.1	omega-amidase,_chloroplastic,_transcript_variant_X2	Olive	PF00795:Carbon-nitrogen_hydrolase	IPR017439:Amidohydrolase//IPR036264:Bacterial exopeptidase dimerisation domain
LOC111373556	2328.4	2.05237	4.14788	0.128725	15.9438	3.14e-57	9.04e-56	XP_022851873.1	glycine_dehydrogenase_(decarboxylating),_mitochondrial	Olive	PF02347:Glycine_cleavage_system_P-protein
LOC111373557	1794.74	2.46577	5.52421	0.1361	18.1173	2.33e-73	9.09e-72	XP_022851874.1	acyl-lipid_(9-3)-desaturase-like	Olive	PF00487:Fatty_acid_desaturase//PF00173:Cytochrome_b5-like_Heme/Steroid_binding_domain	IPR011993:PH-like domain superfamily//IPR004182:GRAM domain
LOC111373558	845.159	0.701832	1.62657	0.11984	5.85639	4.73e-09	2.09e-08	XP_022851875.1	UDP-sulfoquinovose_synthase,_chloroplastic-like	Olive	PF01370:NAD_dependent_epimerase/dehydratase_family	IPR003591:Leucine-rich repeat, typical subtype//IPR001611:Leucine-rich repeat//IPR032675:Leucine-rich repeat domain superfamily
LOC111373560	235.842	0.871175	1.82915	0.221988	3.92443	8.69e-05	0.000239494	XP_022851877.1	protein_indeterminate-domain_12-like	Olive	PF12171:Zinc-finger_double-stranded_RNA-binding	IPR000719:Protein kinase domain//IPR017441:Protein kinase, ATP binding site//IPR011009:Protein kinase-like domain superfamily
LOC111373567	1605.59	0.334577	1.26101	0.129666	2.58029	0.0098718	0.0194265	XP_022851887.1	elongation_factor_G-2,_chloroplastic	Olive	PF03764:Elongation_factor_G,_domain_IV//PF00679:Elongation_factor_G_C-terminus//PF00009:Elongation_factor_Tu_GTP_binding_domain//PF14492:Elongation_Factor_G,_domain_II//PF03144:Elongation_factor_Tu_domain_2	IPR008271:Serine/threonine-protein kinase, active site//IPR000719:Protein kinase domain//IPR002902:Gnk2-homologous domain//IPR011009:Protein kinase-like domain superfamily//IPR038408:Gnk2-homologous domain superfamily
LOC111373580	338.289	1.67611	3.19564	0.171497	9.77341	1.46e-22	1.44e-21	XP_022851900.1	uncharacterized_LOC111373580	Olive
LOC111373586	65.4401	1.56467	2.9581	0.393604	3.97525	7.03e-05	0.000196108	XP_022851907.1	cyclin-dependent_kinase_inhibitor_3-like	Olive		IPR011993:PH-like domain superfamily//IPR004182:GRAM domain
LOC111373588	373.912	0.704982	1.63012	0.165423	4.26169	2.03e-05	6.06e-05	XP_022851910.1	uncharacterized_protein_SYNPCC7002_A1590	Olive	PF09366:Protein_of_unknown_function_(DUF1997)	IPR024709:Putative O-fucosyltransferase, plant
LOC111373589	269.697	2.54197	5.82382	0.215541	11.7934	4.22e-32	6.05e-31			Olive
LOC111373590	266.468	2.61842	6.14079	0.247475	10.5805	3.67e-26	4.17e-25	XP_022851908.1	probable_LRR_receptor-like_serine/threonine-protein_kinase_At5g48740	Olive	PF12819:Malectin-like_domain//PF07714:Protein_tyrosine_kinase
LOC111373591	495.905	0.382311	1.30343	0.13967	2.73725	0.00619553	0.0126849	XP_022851913.1	phosphatidylinositol/phosphatidylcholine_transfer_protein_SFH9-like,_transcript_variant_X8	Olive	PF00650:CRAL/TRIO_domain//PF03765:CRAL/TRIO,_N-terminal_domain	IPR000535:Major sperm protein (MSP) domain//IPR008962:PapD-like superfamily//IPR016763:Vesicle-associated membrane-protein-associated protein//IPR013783:Immunoglobulin-like fold
LOC111373592	1302.22	0.615577	1.53217	0.120612	5.10376	3.33e-07	1.23e-06	XP_022851917.1	chromatin_modification-related_protein_EAF1_B-like,_transcript_variant_X4	Olive	PF07529:HSA//PF13921:Myb-like_DNA-binding_domain	IPR000679:Zinc finger, GATA-type//IPR013088:Zinc finger, NHR/GATA-type
LOC111373593	179.99	1.35609	2.55991	0.256442	5.2881	1.24e-07	4.76e-07	XP_022851939.1	alcohol_dehydrogenase-like_6	Olive	PF08240:Alcohol_dehydrogenase_GroES-like_domain//PF00107:Zinc-binding_dehydrogenase	IPR000048:IQ motif, EF-hand binding site
LOC111373602	726.964	1.17846	2.26336	0.140846	8.36702	5.91e-17	4.42e-16	XP_022851926.1	transmembrane_protein_205-like	Olive	PF13664:Domain_of_unknown_function_(DUF4149)
LOC111373612	56.9252	1.77492	3.4222	0.378378	4.69088	2.72e-06	9.07e-06	XP_022851934.1	tRNA_(guanine(26)-N(2))-dimethyltransferase-like,_transcript_variant_X3	Olive	PF02005:N2,N2-dimethylguanosine_tRNA_methyltransferase	IPR001494:Importin-beta, N-terminal domain//IPR016024:Armadillo-type fold
LOC111373614	418.515	1.52811	2.88408	0.264806	5.77068	7.9e-09	3.42e-08	XP_022851936.1	alpha-galactosidase_3-like	Olive	PF16499:Alpha_galactosidase_A//PF17801:Alpha_galactosidase_C-terminal_beta_sandwich_domain	IPR010920:LSM domain superfamily//IPR034098:Small nuclear ribonucleoprotein G//IPR001163:LSM domain, eukaryotic/archaea-type
LOC111373624	321.568	2.01302	4.03625	0.560132	3.59383	0.000325858	0.000824848	XP_022851945.1	uncharacterized_LOC111373624	Olive	PF06521:PAR1_protein	IPR001841:Zinc finger, RING-type//IPR013083:Zinc finger, RING/FYVE/PHD-type
LOC111373628	911.154	0.676383	1.59813	0.133359	5.0719	3.94e-07	1.45e-06	XP_022851948.1	60S_ribosomal_protein_L36-2-like	Olive	PF01158:Ribosomal_protein_L36e
LOC111373631	1332.83	1.22357	2.33524	0.261586	4.6775	2.9e-06	9.63e-06	XP_022851955.1	probable_mediator_of_RNA_polymerase_II_transcription_subunit_36b,_transcript_variant_X2	Olive	PF01269:Fibrillarin	IPR012976:NOSIC//IPR002687:Nop domain//IPR029012:Helix hairpin bin domain superfamily//IPR042239:Nop, C-terminal domain//IPR036070:Nop domain superfamily
LOC111373632	827.185	1.26919	2.41027	0.533323	2.37978	0.0173229	0.0323277	XP_022851956.1	mediator_of_RNA_polymerase_II_transcription_subunit_36a-like	Olive	PF01269:Fibrillarin	IPR015443:Aldose 1-epimerase//IPR011013:Galactose mutarotase-like domain superfamily//IPR014718:Glycoside hydrolase-type carbohydrate-binding
LOC111373636	990.785	0.603623	1.51953	0.125985	4.79123	1.66e-06	5.69e-06	XP_022851963.1	silicon_efflux_transporter_LSI2-like,_transcript_variant_X3	Olive	PF03600:Citrate_transporter
LOC111373651	545.806	0.858082	1.81263	0.178616	4.80405	1.55e-06	5.35e-06	XP_022851981.1	threonine--tRNA_ligase,_mitochondrial_1-like,_transcript_variant_X2	Olive	PF07973:Threonyl_and_Alanyl_tRNA_synthetase_second_additional_domain//PF02824:TGS_domain//PF00587:tRNA_synthetase_class_II_core_domain_(G,_H,_P,_S_and_T)//PF03129:Anticodon_binding_domain	IPR029058:Alpha/Beta hydrolase fold//IPR038554:Dipeptidylpeptidase IV, N-terminal domain superfamily
LOC111373653	1302.74	0.633693	1.55153	0.139867	4.53069	5.88e-06	1.88e-05	XP_022851988.1	serine/arginine-rich_splicing_factor_RS31-like,_transcript_variant_X6	Olive	PF00076:RNA_recognition_motif._(a.k.a._RRM,_RBD,_or_RNP_domain)	IPR003591:Leucine-rich repeat, typical subtype//IPR017441:Protein kinase, ATP binding site//IPR000719:Protein kinase domain//IPR011009:Protein kinase-like domain superfamily//IPR032675:Leucine-rich repeat domain superfamily//IPR008271:Serine/threonine-protein kinase, active site
LOC111373655	818.39	0.510831	1.42487	0.165464	3.08727	0.00202005	0.00450506	XP_022851991.1	calcium-dependent_protein_kinase_26-like,_transcript_variant_X3	Olive	PF00069:Protein_kinase_domain
LOC111373657	53.2543	0.947201	1.92813	0.363996	2.60223	0.00926204	0.0183306	XP_022851994.1	uncharacterized_LOC111373657	Olive	PF00266:Aminotransferase_class-V	IPR029058:Alpha/Beta hydrolase fold
LOC111373668	70.7685	3.22463	9.34779	0.429946	7.50007	6.38e-14	3.98e-13	XP_022852004.1	zinc_finger_CCCH_domain-containing_protein_55-like,_transcript_variant_X4	Olive	PF00642:Zinc_finger_C-x8-C-x5-C-x3-H_type_(and_similar)//PF00076:RNA_recognition_motif._(a.k.a._RRM,_RBD,_or_RNP_domain)
LOC111373670	202.789	0.632731	1.5505	0.216441	2.92335	0.00346289	0.00741067		uncharacterized_LOC111373670	Olive		IPR002885:Pentatricopeptide repeat//IPR011990:Tetratricopeptide-like helical domain superfamily
LOC111373671	126.603	0.944957	1.92513	0.25553	3.69802	0.000217284	0.000564763		uncharacterized_LOC111373671	Olive
LOC111373685	343.393	0.544646	1.45866	0.16798	3.24233	0.00118556	0.00274864		uncharacterized_LOC111373685,_transcript_variant_X9	Olive
LOC111373704	364.859	3.63754	12.4454	0.21409	16.9907	9.62e-65	3.21e-63	XP_022852049.1	transcription_factor_bHLH71-like	Olive	PF00010:Helix-loop-helix_DNA-binding_domain	IPR035595:UDP-glycosyltransferase family, conserved site
LOC111373711	1662.35	0.618974	1.53578	0.148873	4.15773	3.21e-05	9.36e-05			Olive		IPR000904:Sec7 domain//IPR016024:Armadillo-type fold//IPR023394:Sec7, C-terminal domain superfamily//IPR035999:Sec7 domain superfamily
LOC111373715	167.762	2.62966	6.1888	0.259586	10.1302	4.06e-24	4.25e-23	XP_022852058.1	putative_late_blight_resistance_protein_homolog_R1B-17	Olive	PF00931:NB-ARC_domain	IPR015421:Pyridoxal phosphate-dependent transferase, major domain//IPR004838:Aminotransferases, class-I, pyridoxal-phosphate-binding site//IPR015422:Pyridoxal phosphate-dependent transferase domain 1//IPR015424:Pyridoxal phosphate-dependent transferase
LOC111373759	59.8167	1.12435	2.18004	0.459126	2.4489	0.0143295	0.0272449	XP_022852092.1	proline-rich_receptor-like_protein_kinase_PERK1	Olive	PF07714:Protein_tyrosine_kinase	IPR023214:HAD superfamily//IPR006384:Pyridoxal phosphate phosphatase-related//IPR016965:Phosphatase PHOSPHO-type//IPR036412:HAD-like superfamily
LOC111373770	1322.35	1.02523	2.03528	0.256491	3.99713	6.41e-05	0.000179716	XP_022852101.1	T-complex_protein_1_subunit_epsilon-like	Olive	PF00118:TCP-1/cpn60_chaperonin_family	IPR036869:Chaperone J-domain superfamily//IPR001623:DnaJ domain//IPR018253:DnaJ domain, conserved site
LOC111373782	128.264	0.585731	1.5008	0.240276	2.43774	0.0147794	0.0279856	XP_022852112.1	light-induced_protein,_chloroplastic-like	Olive	PF04755:PAP_fibrillin	IPR009071:High mobility group box domain//IPR036910:High mobility group box domain superfamily
LOC111373789	131.25	0.835214	1.78412	0.239123	3.49282	0.00047795	0.00117801		uncharacterized_LOC111373789,_transcript_variant_X2	Olive		IPR013320:Concanavalin A-like lectin/glucanase domain superfamily
LOC111373797	1939.72	0.51791	1.43188	0.145062	3.57027	0.00035662	0.000897044	XP_022852128.1	AT-hook_motif_nuclear-localized_protein_10-like,_transcript_variant_X3	Olive	PF03479:Plants_and_Prokaryotes_Conserved_(PCC)_domain	IPR003593:AAA+ ATPase domain//IPR003439:ABC transporter-like//IPR034003:ATP-binding cassette transporter, PDR-like subfamily G, domain 2//IPR034001:ATP-binding cassette transporter, PDR-like subfamily G, domain 1//IPR027417:P-loop containing nucleoside triphosphate hydrolase
LOC111373799	561.373	0.592906	1.50828	0.137666	4.30686	1.66e-05	5e-05	XP_022852131.1	scarecrow-like_protein_22,_transcript_variant_X2	Olive	PF03514:GRAS_domain_family	IPR011050:Pectin lyase fold/virulence factor//IPR006626:Parallel beta-helix repeat//IPR012334:Pectin lyase fold
LOC111373803	393.559	1.4478	2.72792	0.168898	8.57204	1.02e-17	7.92e-17	XP_022852134.1	probable_WRKY_transcription_factor_57	Olive	PF03106:WRKY_DNA_-binding_domain
LOC111373817	628.71	1.08584	2.12261	0.14919	7.27822	3.38e-13	2.02e-12	XP_022852165.1	magnesium_transporter_MRS2-5,_transcript_variant_X6	Olive	PF01544:CorA-like_Mg2+_transporter_protein	IPR018247:EF-Hand 1, calcium-binding site//IPR002048:EF-hand domain//IPR011992:EF-hand domain pair
LOC111373825	178.566	3.53589	11.5987	0.284515	12.4278	1.85e-35	2.93e-34		uncharacterized_protein_LOC111373825	Olive		IPR012337:Ribonuclease H-like superfamily
LOC111373832	865.489	0.89633	1.86133	0.129497	6.92162	4.47e-12	2.48e-11	XP_022852180.1	putative_late_blight_resistance_protein_homolog_R1B-14	Olive	PF00931:NB-ARC_domain
LOC111373845	1670.48	0.998584	1.99804	0.115982	8.6098	7.32e-18	5.72e-17	XP_022852194.1	putative_late_blight_resistance_protein_homolog_R1B-14	Olive	PF18052:Rx_N-terminal_domain//PF00931:NB-ARC_domain	IPR036879:Transcription factor, MADS-box superfamily//IPR002100:Transcription factor, MADS-box
LOC111373846	1131.69	0.828244	1.77552	0.126334	6.55596	5.53e-11	2.85e-10	XP_022852196.1	putative_late_blight_resistance_protein_homolog_R1B-17,_transcript_variant_X3	Olive	PF00931:NB-ARC_domain//PF18052:Rx_N-terminal_domain	IPR010089:Flavoprotein WrbA-like//IPR029039:Flavoprotein-like superfamily//IPR008254:Flavodoxin/nitric oxide synthase
LOC111373856	1178.11	0.461428	1.3769	0.112678	4.09511	4.22e-05	0.000121202	XP_022852209.1	protein_DEFECTIVE_IN_EXINE_FORMATION_1,_transcript_variant_X2	Olive	PF13517:Repeat_domain_in_Vibrio,_Colwellia,_Bradyrhizobium_and_Shewanella
LOC111373857	406.44	1.67189	3.18632	0.166285	10.0544	8.79e-24	9.06e-23	XP_022852211.1	UPF0503_protein_At3g09070,_chloroplastic-like	Olive	PF05340:Protein_of_unknown_function_(DUF740)	IPR033873:CND41-like//IPR033121:Peptidase family A1 domain//IPR001969:Aspartic peptidase, active site//IPR021109:Aspartic peptidase domain superfamily//IPR001461:Aspartic peptidase A1 family
LOC111373867	88.2759	1.19894	2.29571	0.324887	3.69033	0.000223965	0.000580827	XP_022852224.1	pentatricopeptide_repeat-containing_protein_At1g09900-like,_transcript_variant_X4	Olive	PF12854:PPR_repeat//PF13041:PPR_repeat_family//PF01535:PPR_repeat
LOC111373872	114.401	0.984144	1.97814	0.256058	3.84344	0.000121324	0.000326602	XP_022852231.1	putative_anthocyanidin_reductase	Olive	PF01370:NAD_dependent_epimerase/dehydratase_family	IPR008928:Six-hairpin glycosidase superfamily//IPR012341:Six-hairpin glycosidase-like superfamily
LOC111373873	762.572	0.410565	1.32921	0.12578	3.26415	0.00109793	0.00255851		acyltransferase-like_protein_At1g54570,_chloroplastic	Olive		IPR001199:Cytochrome b5-like heme/steroid binding domain//IPR018506:Cytochrome b5, heme-binding site//IPR036400:Cytochrome b5-like heme/steroid binding domain superfamily
LOC111373880	393.265	0.749824	1.68159	0.169658	4.41961	9.89e-06	3.08e-05	XP_022852241.1	protein_DETOXIFICATION_33-like	Olive	PF01554:MatE	IPR003340:B3 DNA binding domain//IPR015300:DNA-binding pseudobarrel domain superfamily
LOC111373881	323.168	0.588765	1.50396	0.164149	3.58677	0.000334794	0.000845496	XP_022852242.1	uncharacterized_LOC111373881	Olive	PF04765:Protein_of_unknown_function_(DUF616)
LOC111373885	1542.97	2.22622	4.67905	0.130973	16.9976	8.56e-65	2.86e-63	XP_022852245.1	aureusidin_synthase-like	Olive	PF12142:Polyphenol_oxidase_middle_domain//PF00264:Common_central_domain_of_tyrosinase//PF12143:Protein_of_unknown_function_(DUF_B2219)	IPR036525:Tubulin/FtsZ, GTPase domain superfamily//IPR002453:Beta tubulin//IPR018316:Tubulin/FtsZ, 2-layer sandwich domain//IPR003008:Tubulin/FtsZ, GTPase domain//IPR037103:Tubulin/FtsZ, C-terminal domain superfamily//IPR000217:Tubulin//IPR013838:Beta tubulin, autoregulation binding site//IPR008280:Tubulin/FtsZ, C-terminal//IPR023123:Tubulin, C-terminal//IPR017975:Tubulin, conserved site
LOC111373893	826.138	1.4449	2.72244	0.127653	11.319	1.06e-29	1.38e-28	XP_022852250.1	uncharacterized_LOC111373893	Olive	PF01712:Deoxynucleoside_kinase
LOC111373900	613.727	1.53742	2.90275	0.633779	2.4258	0.0152746	0.0288547	XP_022852264.1	proteinase_inhibitor_PSI-1.2-like	Olive	PF02428:Potato_type_II_proteinase_inhibitor_family
LOC111373904	71.0508	1.25657	2.38926	0.330938	3.79698	0.000146467	0.000390042	XP_022852268.1	dihydrolipoyl_dehydrogenase_2,_chloroplastic	Olive	PF07992:Pyridine_nucleotide-disulphide_oxidoreductase
LOC111373912	974.669	1.21446	2.32053	0.135436	8.96699	3.05e-19	2.55e-18	XP_022852276.1	pectinesterase-like,_transcript_variant_X2	Olive	PF01095:Pectinesterase//PF04043:Plant_invertase/pectin_methylesterase_inhibitor
LOC111373915	142.02	0.943011	1.92254	0.260433	3.62093	0.000293549	0.000748358		uncharacterized_LOC111373915	Olive		IPR038156:Phytochelatin synthase, N-terminal domain superfamily//IPR038765:Papain-like cysteine peptidase superfamily//IPR007719:Phytochelatin synthase, N-terminal catalytic domain
LOC111373916	162.539	4.11067	17.2757	0.357394	11.5018	1.29e-30	1.74e-29	XP_022852280.1	pectinesterase-like	Olive	PF01095:Pectinesterase//PF04043:Plant_invertase/pectin_methylesterase_inhibitor	IPR002885:Pentatricopeptide repeat//IPR011990:Tetratricopeptide-like helical domain superfamily
LOC111373917	89.9885	2.67717	6.39602	0.359307	7.45095	9.27e-14	5.73e-13	XP_022852281.1	DNA_repair_protein_RAD51_homolog	Olive	PF08423:Rad51
LOC111373925	131.359	1.58345	2.99686	0.296327	5.34359	9.11e-08	3.56e-07	XP_022852286.1	thylakoid_lumenal_17.9_kDa_protein,_chloroplastic	Olive
LOC111373936	818.4	0.70097	1.6256	0.230172	3.04541	0.0023236	0.0051293	XP_022852298.1	SNF1-related_protein_kinase_regulatory_subunit_gamma-1-like	Olive	PF00571:CBS_domain	IPR011990:Tetratricopeptide-like helical domain superfamily//IPR002885:Pentatricopeptide repeat
LOC111373941	57.3797	0.966914	1.95466	0.401875	2.406	0.016128	0.0302984	XP_022852313.1	myb_family_transcription_factor_PHL8-like,_transcript_variant_X2	Olive	PF14379:MYB-CC_type_transfactor,_LHEQLE_motif//PF00249:Myb-like_DNA-binding_domain
LOC111373950	314.109	1.66389	3.16869	0.176685	9.41723	4.63e-21	4.22e-20	XP_022852321.1	ribonucleoside-diphosphate_reductase_small_chain-like	Olive	PF00268:Ribonucleotide_reductase,_small_chain	IPR000719:Protein kinase domain//IPR002110:Ankyrin repeat//IPR011009:Protein kinase-like domain superfamily//IPR020683:Ankyrin repeat-containing domain//IPR036770:Ankyrin repeat-containing domain superfamily
LOC111373951	97.1827	0.845972	1.79748	0.274311	3.08399	0.00204244	0.00455077	XP_022852323.1	uncharacterized_protein_YciO,_transcript_variant_X2	Olive	PF01300:Telomere_recombination
LOC111373952	84.83	0.933832	1.91034	0.401723	2.32457	0.020095	0.0369662		uncharacterized_LOC111373952	Olive
LOC111373953	240.155	0.397792	1.31749	0.180574	2.20293	0.0275994	0.0490485	XP_022852325.1	mitochondrial_import_receptor_subunit_TOM20-like,_transcript_variant_X2	Olive	PF06552:Plant_specific_mitochondrial_import_receptor_subunit_TOM20	IPR036987:SRA-YDG superfamily//IPR007728:Pre-SET domain//IPR001214:SET domain//IPR003105:SRA-YDG//IPR025794:Histone H3-K9 methyltransferase, plant//IPR015947:PUA-like superfamily
LOC111373954	435.929	1.41127	2.65972	0.509713	2.76876	0.00562705	0.0116043	XP_022852326.1	50S_ribosomal_protein_L27,_chloroplastic	Olive	PF01016:Ribosomal_L27_protein	IPR003690:Transcription termination factor, mitochondrial/chloroplastic//IPR038538:MTERF superfamily, mitochondrial/chloroplastic
LOC111373957	50.2615	1.76972	3.40987	0.440181	4.02043	5.81e-05	0.000163718	XP_022852329.1	zinc_finger_protein_511-like	Olive
LOC111373958	339.287	1.00514	2.00714	0.167561	5.99868	1.99e-09	9.07e-09	XP_022852330.1	peroxidase_55-like	Olive	PF00141:Peroxidase	IPR001841:Zinc finger, RING-type//IPR013083:Zinc finger, RING/FYVE/PHD-type
LOC111373975	313.092	0.563512	1.47786	0.229669	2.45358	0.0141442	0.0269356	XP_022852342.1	protein_MICRORCHIDIA_2-like	Olive	PF17942:Morc6_ribosomal_protein_S5_domain_2-like//PF13589:Histidine_kinase-,_DNA_gyrase_B-,_and_HSP90-like_ATPase
LOC111373976	868.501	0.413809	1.3322	0.125615	3.29427	0.000986781	0.00231668	XP_022852345.1	uncharacterized_LOC111373976,_transcript_variant_X2	Olive		IPR017887:Transcription factor TCP subgroup
LOC111373991	85.0261	1.92914	3.80829	0.324531	5.94441	2.77e-09	1.25e-08		uncharacterized_LOC111373991	Olive		IPR034751:Yippee domain
LOC111373993	130.013	1.09641	2.13821	0.253502	4.32505	1.52e-05	4.62e-05	XP_022852360.1	F-box_protein_At2g32560-like,_transcript_variant_X2	Olive	PF00646:F-box_domain
LOC111373998	341.32	0.646801	1.56569	0.16173	3.99925	6.35e-05	0.000178282	XP_022852367.1	probable_auxin_efflux_carrier_component_1b	Olive	PF03547:Membrane_transport_protein	IPR019786:Zinc finger, PHD-type, conserved site//IPR001965:Zinc finger, PHD-type//IPR036361:SAP domain superfamily//IPR003034:SAP domain//IPR011011:Zinc finger, FYVE/PHD-type//IPR013083:Zinc finger, RING/FYVE/PHD-type//IPR004181:Zinc finger, MIZ-type
LOC111373999	433.775	2.44844	5.45825	0.190389	12.8602	7.54e-38	1.28e-36	XP_022852368.1	serine_carboxypeptidase-like_45	Olive	PF00450:Serine_carboxypeptidase	IPR001623:DnaJ domain//IPR036869:Chaperone J-domain superfamily
LOC111374000	341.531	0.610591	1.52688	0.266894	2.28777	0.0221509	0.0403465	XP_022852369.1	10_kDa_chaperonin,_mitochondrial-like	Olive	PF00166:Chaperonin_10_Kd_subunit	IPR002902:Gnk2-homologous domain//IPR038408:Gnk2-homologous domain superfamily
LOC111374001	467.424	0.495082	1.4094	0.143188	3.45757	0.000545062	0.0013321	XP_022852370.1	putative_SWI/SNF-related_matrix-associated_actin-dependent_regulator_of_chromatin_subfamily_A_member_3-like_1	Olive	PF00271:Helicase_conserved_C-terminal_domain//PF08797:HIRAN_domain//PF00097:Zinc_finger,_C3HC4_type_(RING_finger)//PF00176:SNF2_family_N-terminal_domain
LOC111374010	472.093	0.883937	1.8454	0.146543	6.03194	1.62e-09	7.44e-09	XP_022852385.1	cytochrome_P450_94A1-like	Olive	PF00067:Cytochrome_P450	IPR006121:Heavy metal-associated domain, HMA//IPR036163:Heavy metal-associated domain superfamily
LOC111374017	142.79	1.43973	2.71269	0.302883	4.7534	2e-06	6.8e-06	XP_022852392.1	neutral_ceramidase-like	Olive	PF04734:Neutral/alkaline_non-lysosomal_ceramidase,_N-terminal	IPR016024:Armadillo-type fold//IPR011989:Armadillo-like helical
LOC111374029	412.779	0.357077	1.28083	0.147275	2.42456	0.0153271	0.0289473	XP_022852406.1	serine/threonine-protein_phosphatase_4_regulatory_subunit_2,_transcript_variant_X2	Olive	PF09184:PPP4R2	IPR001891:Malic oxidoreductase//IPR012301:Malic enzyme, N-terminal domain//IPR036291:NAD(P)-binding domain superfamily//IPR015884:Malic enzyme, conserved site//IPR037062:Malic enzyme, N-terminal domain superfamily//IPR012302:Malic enzyme, NAD-binding
LOC111374036	1205.05	0.415767	1.33401	0.152675	2.72321	0.00646502	0.0131869	XP_022852426.1	pre-rRNA-processing_protein_ESF1,_transcript_variant_X7	Olive	PF08159:NUC153_domain	IPR027417:P-loop containing nucleoside triphosphate hydrolase//IPR007502:Helicase-associated domain//IPR001650:Helicase, C-terminal//IPR014001:Helicase superfamily 1/2, ATP-binding domain//IPR002464:DNA/RNA helicase, ATP-dependent, DEAH-box type, conserved site//IPR022967:RNA-binding domain, S1//IPR003029:S1 domain//IPR012340:Nucleic acid-binding, OB-fold
LOC111374037	1012	0.760488	1.69406	0.130954	5.80727	6.35e-09	2.78e-08	XP_022852428.1	protein_indeterminate-domain_9-like,_transcript_variant_X2	Olive	PF12171:Zinc-finger_double-stranded_RNA-binding	IPR032675:Leucine-rich repeat domain superfamily//IPR003593:AAA+ ATPase domain//IPR027417:P-loop containing nucleoside triphosphate hydrolase
LOC111374039	265.026	1.9801	3.9452	0.198143	9.99327	1.63e-23	1.67e-22	XP_022852429.1	uncharacterized_LOC111374039	Olive	PF02519:Auxin_responsive_protein
LOC111374047	58.7592	1.12242	2.17712	0.402629	2.78772	0.00530801	0.0110016	XP_022852434.1	cytochrome_P450_84A1-like	Olive	PF00067:Cytochrome_P450
LOC111374054	666.785	0.477044	1.39189	0.13284	3.59112	0.000329256	0.00083251	XP_022852441.1	uncharacterized_LOC111374054	Olive	PF13320:Domain_of_unknown_function_(DUF4091)	IPR029058:Alpha/Beta hydrolase fold
LOC111374056	226.658	2.34953	5.09657	0.214915	10.9323	8.07e-28	9.87e-27	XP_022852444.1	protein_indeterminate-domain_1-like,_transcript_variant_X3	Olive	PF12171:Zinc-finger_double-stranded_RNA-binding	IPR000164:Histone H3/CENP-A//IPR009072:Histone-fold
LOC111374057	276.869	1.59305	3.01687	0.181262	8.78867	1.51e-18	1.22e-17	XP_022852447.1	deSI-like_protein_At4g17486,_transcript_variant_X2	Olive	PF05903:PPPDE_putative_peptidase_domain
LOC111374059	586.953	1.75831	3.38302	0.140149	12.5461	4.18e-36	6.76e-35	XP_022852449.1	protein_BRASSINAZOLE-RESISTANT_1-like	Olive	PF05687:BES1/BZR1_plant_transcription_factor,_N-terminal
LOC111374064	374.756	2.24618	4.74425	0.257937	8.70825	3.09e-18	2.45e-17	XP_022852452.1	30S_ribosomal_protein_S13,_chloroplastic-like	Olive	PF00416:Ribosomal_protein_S13/S18
LOC111374066	85.397	1.07428	2.10568	0.292324	3.67498	0.000237866	0.000614507	XP_022852454.1	uncharacterized_LOC111374066,_transcript_variant_X8	Olive		IPR036188:FAD/NAD(P)-binding domain superfamily//IPR016156:FAD/NAD-linked reductase, dimerisation domain superfamily
LOC111374073	722.361	1.21845	2.32697	0.139806	8.7153	2.9e-18	2.31e-17	XP_022852464.1	transmembrane_protein_87A-like,_transcript_variant_X5	Olive	PF06814:Lung_seven_transmembrane_receptor	IPR004883:Lateral organ boundaries, LOB
LOC111374079	70.2186	1.36278	2.5718	0.342009	3.98463	6.76e-05	0.00018897	XP_022852474.1	zinc_finger_CCCH_domain-containing_protein_62-like	Olive	PF02037:SAP_domain//PF18044:CCCH-type_zinc_finger	IPR013780:Glycosyl hydrolase, all-beta//IPR002241:Glycoside hydrolase, family 27//IPR000111:Glycoside hydrolase family 27/36, conserved site//IPR013785:Aldolase-type TIM barrel//IPR017853:Glycoside hydrolase superfamily
LOC111374084	2822.26	0.901286	1.86773	0.167404	5.38388	7.29e-08	2.88e-07	XP_022852480.1	60S_ribosomal_protein_L11-like	Olive	PF00281:Ribosomal_protein_L5//PF00673:ribosomal_L5P_family_C-terminus	IPR004170:WWE domain//IPR012317:Poly(ADP-ribose) polymerase, catalytic domain//IPR037197:WWE domain superfamily
LOC111374087	276.968	0.940986	1.91984	0.185377	5.07608	3.85e-07	1.42e-06	XP_022852484.1	chromatin_remodeling_protein_EBS-like,_transcript_variant_X2	Olive	PF01426:BAH_domain//PF00628:PHD-finger	IPR038770:Sodium/solute symporter superfamily
LOC111374088	171.048	0.79892	1.7398	0.229996	3.47362	0.000513494	0.00126053	XP_022852485.1	chromatin_remodeling_protein_EBS-like	Olive	PF00628:PHD-finger//PF01426:BAH_domain	IPR011009:Protein kinase-like domain superfamily//IPR017441:Protein kinase, ATP binding site//IPR000719:Protein kinase domain
LOC111374135	301.545	0.961271	1.94702	0.186396	5.15714	2.51e-07	9.37e-07	XP_022852532.1	nucleobase-ascorbate_transporter_6-like,_transcript_variant_X5	Olive	PF00860:Permease_family
LOC111374142	75.2294	1.38363	2.60923	0.342653	4.03798	5.39e-05	0.00015269	XP_022852541.1	uncharacterized_LOC111374142	Olive	PF02926:THUMP_domain	IPR023201:SecY domain superfamily
LOC111374143	170.992	1.68767	3.22137	0.224776	7.50824	5.99e-14	3.75e-13	XP_022852542.1	uncharacterized_LOC111374143	Olive	PF14570:RING/Ubox_like_zinc-binding_domain	IPR002109:Glutaredoxin//IPR036249:Thioredoxin-like superfamily//IPR011905:Glutaredoxin-like, plant II
LOC111374144	172.48	2.61269	6.11644	0.316918	8.24405	1.66e-16	1.21e-15	XP_022852545.1	two-component_response_regulator_ARR5-like,_transcript_variant_X2	Olive	PF00072:Response_regulator_receiver_domain	IPR036397:Ribonuclease H superfamily//IPR012337:Ribonuclease H-like superfamily//IPR013520:Exonuclease, RNase T/DNA polymerase III
LOC111374145	942.489	0.521673	1.43562	0.136924	3.80994	0.000138998	0.000371092	XP_022852546.1	betaine_aldehyde_dehydrogenase,_chloroplastic-like	Olive	PF00171:Aldehyde_dehydrogenase_family	IPR009072:Histone-fold
LOC111374151	365.024	0.574887	1.48956	0.173815	3.30747	0.000941429	0.00221888	XP_022852552.1	exocyst_complex_component_EXO70A1-like,_transcript_variant_X2	Olive	PF03081:Exo70_exocyst_complex_subunit
LOC111374154	3450.55	5.62053	49.1979	0.147653	38.0658	0	0	XP_022852554.1	polyphenol_oxidase,_chloroplastic-like	Olive	PF12143:Protein_of_unknown_function_(DUF_B2219)//PF12142:Polyphenol_oxidase_middle_domain//PF00264:Common_central_domain_of_tyrosinase
LOC111374155	52.6077	5.37858	41.6019	0.806067	6.67262	2.51e-11	1.32e-10		uncharacterized_LOC111374155	Olive		IPR028082:Periplasmic binding protein-like I//IPR001320:Ionotropic glutamate receptor
LOC111374156	6088.55	4.13612	17.5831	0.110622	37.3895	5.79e-306	5.41e-303	XP_022852555.1	polyphenol_oxidase_I,_chloroplastic-like	Olive	PF12142:Polyphenol_oxidase_middle_domain//PF12143:Protein_of_unknown_function_(DUF_B2219)//PF00264:Common_central_domain_of_tyrosinase	IPR036047:F-box-like domain superfamily
LOC111374157	162.225	1.22177	2.33233	0.256462	4.76395	1.9e-06	6.47e-06		magnesium_protoporphyrin_IX_methyltransferase,_chloroplastic-like	Olive
LOC111374161	91.883	1.84256	3.58647	0.325363	5.6631	1.49e-08	6.29e-08	XP_022852560.1	kinesin-like_protein_KIN-5D	Olive
LOC111374168	634.552	0.576494	1.49122	0.129187	4.46247	8.1e-06	2.55e-05	XP_022852566.1	glycerophosphodiester_phosphodiesterase_GDPDL4-like	Olive	PF03009:Glycerophosphoryl_diester_phosphodiesterase_family	IPR001478:PDZ domain//IPR036034:PDZ superfamily
LOC111374176	515.416	0.712303	1.63842	0.154662	4.60555	4.11e-06	1.34e-05	XP_022852570.1	homoserine_kinase	Olive	PF00288:GHMP_kinases_N_terminal_domain//PF08544:GHMP_kinases_C_terminal	IPR001563:Peptidase S10, serine carboxypeptidase//IPR029058:Alpha/Beta hydrolase fold//IPR018202:Serine carboxypeptidase, serine active site
LOC111374177	1069.43	0.754256	1.68676	0.12225	6.16976	6.84e-10	3.23e-09	XP_022852575.1	WEB_family_protein_At5g55860-like,_transcript_variant_X5	Olive	PF05701:Weak_chloroplast_movement_under_blue_light
LOC111374179	71.1241	2.41289	5.32541	0.374552	6.44207	1.18e-10	5.92e-10	XP_022852577.1	NAD-dependent_protein_deacetylase_SRT1	Olive	PF02146:Sir2_family	IPR008271:Serine/threonine-protein kinase, active site//IPR001245:Serine-threonine/tyrosine-protein kinase, catalytic domain//IPR000719:Protein kinase domain//IPR011009:Protein kinase-like domain superfamily//IPR017441:Protein kinase, ATP binding site
LOC111374183	405.05	0.851048	1.80381	0.215958	3.94081	8.12e-05	0.000224555		VIN3-like_protein_1	Olive		IPR006040:Allergen Ole e 1, conserved site
LOC111374187	259.944	0.612017	1.52839	0.18684	3.27562	0.0010543	0.00246315	XP_022852591.1	uncharacterized_LOC111374187	Olive		IPR015712:DNA-directed RNA polymerase, subunit 2//IPR007121:RNA polymerase, beta subunit, conserved site//IPR037033:DNA-directed RNA polymerase, subunit 2, hybrid-binding domain superfamily//IPR014724:RNA polymerase Rpb2, OB-fold//IPR037034:RNA polymerase Rpb2, domain 2 superfamily
LOC111374195	3186.79	1.0929	2.13302	0.145102	7.53194	5e-14	3.14e-13	XP_022852604.1	40S_ribosomal_protein_S8-like	Olive	PF01201:Ribosomal_protein_S8e	IPR036431:ARID DNA-binding domain superfamily//IPR001606:ARID DNA-binding domain//IPR002068:Alpha crystallin/Hsp20 domain//IPR008978:HSP20-like chaperone
LOC111374198	665.841	1.0878	2.12549	0.169359	6.42303	1.34e-10	6.67e-10	XP_022852607.1	cell_division_protein_FtsZ_homolog_1,_chloroplastic	Olive	PF00091:Tubulin/FtsZ_family,_GTPase_domain//PF12327:FtsZ_family,_C-terminal_domain
LOC111374202	200.627	1.114	2.16445	0.207827	5.36021	8.31e-08	3.26e-07	XP_022852614.1	grpE_protein_homolog_2,_mitochondrial-like,_transcript_variant_X2	Olive	PF01025:GrpE	IPR003265:HhH-GPD domain//IPR011257:DNA glycosylase
LOC111374207	249.246	2.87877	7.35522	0.257548	11.1776	5.25e-29	6.71e-28	XP_022852619.1	endoglucanase_11-like	Olive	PF00759:Glycosyl_hydrolase_family_9	IPR029000:Cyclophilin-like domain superfamily
LOC111374216	173.761	1.6176	3.06865	0.239352	6.75826	1.4e-11	7.49e-11	XP_022852627.1	uroporphyrinogen-III_synthase,_chloroplastic-like	Olive	PF02602:Uroporphyrinogen-III_synthase_HemD	IPR011989:Armadillo-like helical//IPR016024:Armadillo-type fold
LOC111374224	51.0477	1.60499	3.04193	0.430077	3.73186	0.000190074	0.000498121	XP_022852632.1	protein_Brevis_radix-like_4	Olive	PF08381:Transcription_factor_regulating_root_and_shoot_growth_via_Pin3//PF13713:Transcription_factor_BRX_N-terminal_domain
LOC111374229	467.422	1.62148	3.07691	0.259353	6.25203	4.05e-10	1.95e-09			Olive		IPR011993:PH-like domain superfamily//IPR000156:Ran binding domain
LOC111374232	434.841	1.43455	2.70297	0.153689	9.33408	1.02e-20	9.1e-20	XP_022852651.1	thylakoidal_processing_peptidase_1,_chloroplastic-like,_transcript_variant_X2	Olive	PF10502:Signal_peptidase,_peptidase_S26//PF00717:Peptidase_S24-like	IPR002710:Dilute domain
LOC111374233	168.972	2.55842	5.89062	0.3015	8.48565	2.15e-17	1.64e-16	XP_022852652.1	lysine_histidine_transporter-like_8	Olive	PF01490:Transmembrane_amino_acid_transporter_protein
LOC111374235	714.954	0.957441	1.94186	0.157678	6.07211	1.26e-09	5.84e-09		nucleosome_assembly_protein_12-like	Olive		IPR001623:DnaJ domain//IPR036869:Chaperone J-domain superfamily//IPR018253:DnaJ domain, conserved site
LOC111374248	383.837	1.31917	2.49522	0.159998	8.24494	1.65e-16	1.2e-15	XP_022852667.1	uncharacterized_LOC111374248	Olive		IPR029058:Alpha/Beta hydrolase fold//IPR000639:Epoxide hydrolase-like
LOC111374250	398.127	0.892468	1.85635	0.194296	4.59334	4.36e-06	1.42e-05	XP_022852670.1	vacuolar_protein_sorting-associated_protein_29-like	Olive	PF12850:Calcineurin-like_phosphoesterase_superfamily_domain
LOC111374301	181.133	2.36478	5.15074	0.270388	8.74589	2.21e-18	1.77e-17	XP_022852725.1	histone_H1-like	Olive	PF00538:linker_histone_H1_and_H5_family
LOC111374306	154.513	1.22258	2.33363	0.269654	4.53387	5.79e-06	1.85e-05	XP_022852818.1	glutamic_acid-rich_protein-like,_transcript_variant_X2	Olive	PF09649:Histone_chaperone_domain_CHZ	IPR032675:Leucine-rich repeat domain superfamily//IPR011009:Protein kinase-like domain superfamily//IPR000719:Protein kinase domain
LOC111374308	1205.67	0.860474	1.81563	0.113628	7.57273	3.65e-14	2.32e-13	XP_022852731.1	ethylene_receptor-like	Olive	PF00512:His_Kinase_A_(phospho-acceptor)_domain//PF02518:Histidine_kinase-,_DNA_gyrase_B-,_and_HSP90-like_ATPase
LOC111374309	1727.42	1.03215	2.04507	0.109711	9.40786	5.06e-21	4.6e-20	XP_022852732.1	probable_polygalacturonase	Olive	PF00295:Glycosyl_hydrolases_family_28
LOC111374315	161.391	0.921919	1.89463	0.307347	2.99961	0.00270329	0.00589701	XP_022852738.1	CTP_synthase-like	Olive	PF06418:CTP_synthase_N-terminus//PF00117:Glutamine_amidotransferase_class-I	IPR027417:P-loop containing nucleoside triphosphate hydrolase//IPR041679:DNA2/NAM7 helicase-like, AAA domain
LOC111374332	139.973	0.625639	1.54289	0.240776	2.59843	0.00936516	0.0185155		uncharacterized_protein_LOC111374332	Olive		IPR038005:Virus X resistance protein-like, coiled-coil domain
LOC111374344	416.336	0.588831	1.50403	0.151791	3.87921	0.000104797	0.000284764	XP_022852766.1	immune-associated_nucleotide-binding_protein_9-like	Olive	PF04548:AIG1_family	IPR019786:Zinc finger, PHD-type, conserved site//IPR019787:Zinc finger, PHD-finger//IPR013083:Zinc finger, RING/FYVE/PHD-type//IPR011011:Zinc finger, FYVE/PHD-type//IPR001965:Zinc finger, PHD-type
LOC111374345	236.607	0.649316	1.56842	0.190084	3.41594	0.000635634	0.00153891	XP_022852767.1	uncharacterized_LOC111374345	Olive		IPR002035:von Willebrand factor, type A//IPR013083:Zinc finger, RING/FYVE/PHD-type//IPR001841:Zinc finger, RING-type//IPR036465:von Willebrand factor A-like domain superfamily
LOC111374367	704.07	1.23249	2.34972	0.138134	8.92241	4.56e-19	3.78e-18	XP_022852797.1	suppressor_of_mec-8_and_unc-52_protein_homolog_1	Olive	PF00400:WD_domain,_G-beta_repeat//PF17814:LisH-like_dimerisation_domain	IPR041806:Polyadenylate-binding protein-interacting protein 5/6/7, CUE domain
LOC111374368	210.059	2.13796	4.4014	0.220138	9.71194	2.68e-22	2.6e-21	XP_022852798.1	glucuronoxylan_4-O-methyltransferase_1-like	Olive	PF04669:Polysaccharide_biosynthesis	IPR001789:Signal transduction response regulator, receiver domain//IPR011006:CheY-like superfamily//IPR005467:Histidine kinase domain//IPR036097:Signal transduction histidine kinase, dimerisation/phosphoacceptor domain superfamily//IPR014525:Ethylene receptor//IPR036890:Histidine kinase/HSP90-like ATPase superfamily//IPR003661:Signal transduction histidine kinase, dimerisation/phosphoacceptor dom…
LOC111374370	314.78	0.565749	1.48016	0.237768	2.37942	0.0173401	0.0323477	XP_022852804.1	phospholipase_SGR2-like,_transcript_variant_X6	Olive	PF02862:DDHD_domain	IPR035513:Invertase/pectin methylesterase inhibitor domain superfamily//IPR006501:Pectinesterase inhibitor domain
LOC111374381	149.229	1.9515	3.86777	0.276075	7.06873	1.56e-12	8.95e-12		uncharacterized_LOC111374381	Olive		IPR014722:Ribosomal protein L2, domain 2//IPR008991:Translation protein SH3-like domain superfamily
LOC111374382	1666.47	3.0885	8.50612	0.262063	11.7854	4.64e-32	6.64e-31	XP_022852815.1	extensin-2-like,_transcript_variant_X2	Olive	PF01190:Pollen_proteins_Ole_e_I_like	IPR000425:Major intrinsic protein//IPR023271:Aquaporin-like
LOC111374390	1873.07	0.425806	1.34332	0.165426	2.574	0.010053	0.0197484	XP_022852824.1	probable_voltage-gated_potassium_channel_subunit_beta	Olive	PF00248:Aldo/keto_reductase_family	IPR015915:Kelch-type beta propeller
[truncated: 6,488 more rows]

## Sheet: Table S3_
Supplementary Table S3. Genes down-regulated during early fruit development in the first comparison (P14 vs. P0)
[truncated: 8,904 more rows]

[truncated: 2 more sheets: Table S4_, Table S5_]
