# Supplementary material for: Characterization of Transcriptome Dynamics during Early Fruit Development in Olive (Olea europaea L.)
Source: Int J Mol Sci. 2023 Jan 4;24(2):961. doi: 10.3390/ijms24020961 (PMC9864153; doi:10.3390/ijms24020961)
Supplement: Supplementary file 1 [file ijms-24-00961-s001.zip › TABLE S6-S7.xls]

## Sheet: Table S6_
Supplementary Table S6. Genes up-regulated during early fruit development in both the first and second comparisons (P14 vs. P0 and P28 vs. P14)
Genes	baseMean	log2FoldChange	FoldChange	lfcSE	stat	pvalue	padj	Gene_ID	description	Organism	pfam	Interpro
LOC111397601	1265.11	7.04893	132.416	0.296391	23.7825	5.06e-125	4.29e-123			Olive		IPR036163:Heavy metal-associated domain superfamily
LOC111397602	355.494	6.99911	127.921	0.504667	13.8688	9.8e-44	2e-42	XP_022880372.1	cytochrome_P450_CYP72A219-like,_transcript_variant_X2	Olive	PF00067:Cytochrome_P450	IPR023299:P-type ATPase, cytoplasmic domain N//IPR018303:P-type ATPase, phosphorylation site//IPR023298:P-type ATPase, transmembrane domain superfamily//IPR008250:P-type ATPase, A domain superfamily//IPR036412:HAD-like superfamily//IPR001757:P-type ATPase//IPR006408:P-type ATPase, subfamily IIB
LOC111375479	1799.89	6.83284	113.996	0.245021	27.8868	3.86e-171	6.22e-169	XP_022854076.1	auxin_response_factor_9-like,_transcript_variant_X2	Olive	PF02309:AUX/IAA_family//PF02362:B3_DNA_binding_domain//PF06507:Auxin_response_factor	IPR011990:Tetratricopeptide-like helical domain superfamily//IPR002885:Pentatricopeptide repeat
LOC111393291	5336.08	6.77221	109.304	0.172205	39.3264	0	0	XP_022874521.1	iridoid_synthase-like	Olive		IPR014024:Auxin efflux carrier, plant type
LOC111390764	1349.14	6.63382	99.3065	0.24801	26.7482	1.3e-157	1.74e-155	XP_022871644.1	delta(12)-fatty-acid_desaturase_FAD2-like	Olive	PF00487:Fatty_acid_desaturase	IPR036612:K Homology domain, type 1 superfamily//IPR004087:K Homology domain
LOC111381944	874.265	6.54061	93.0935	0.314824	20.7754	7.22e-96	4.11e-94	XP_022861559.1	cytochrome_P450_85A-like,_transcript_variant_X2	Olive	PF00067:Cytochrome_P450	IPR015915:Kelch-type beta propeller//IPR036047:F-box-like domain superfamily
LOC111379392	144.017	6.53587	92.7884	0.67876	9.62913	6.02e-22	5.74e-21	XP_022858517.1	endoglucanase_17-like	Olive	PF00759:Glycosyl_hydrolase_family_9
LOC111409231	381.27	6.44755	87.2779	0.418129	15.42	1.2e-53	3.18e-52	XP_022895010.1	major_pollen_allergen_Ole_e_1-like	Olive	PF01190:Pollen_proteins_Ole_e_I_like
LOC111408780	90.5896	6.33547	80.7542	1.437	4.40881	1.04e-05	3.22e-05	XP_022894320.1	laccase-14-like	Olive	PF07731:Multicopper_oxidase//PF00394:Multicopper_oxidase//PF07732:Multicopper_oxidase
LOC111385928	460.851	6.27456	77.416	0.360374	17.4112	6.78e-68	2.38e-66	XP_022866118.1	probable_pectinesterase_68	Olive	PF01095:Pectinesterase	IPR000253:Forkhead-associated (FHA) domain//IPR003593:AAA+ ATPase domain//IPR027417:P-loop containing nucleoside triphosphate hydrolase//IPR003960:ATPase, AAA-type, conserved site//IPR008984:SMAD/FHA domain superfamily
LOC111374860	1812.7	6.12364	69.7265	0.916764	6.67962	2.4e-11	1.26e-10	XP_022853381.1	uncharacterized_LOC111374860,_transcript_variant_X5	Olive
LOC111374859	1811.99	6.04837	66.1822	0.576169	10.4976	8.86e-26	9.92e-25	XP_022853377.1	transcription_factor_MYB3R-1-like	Olive		IPR009057:Homeobox-like domain superfamily//IPR006563:POX domain//IPR001356:Homeobox domain
LOC111374857	5046.62	5.99202	63.6472	0.244708	24.4864	2.06e-132	1.97e-130	XP_022853375.1	alcohol_dehydrogenase_class-3-like	Olive	PF00107:Zinc-binding_dehydrogenase//PF08240:Alcohol_dehydrogenase_GroES-like_domain
LOC111402044	822.938	5.84788	57.5954	0.256529	22.7962	5e-115	3.68e-113	XP_022885852.1	uncharacterized_LOC111402044,_transcript_variant_X2	Olive	PF00582:Universal_stress_protein_family	IPR013083:Zinc finger, RING/FYVE/PHD-type//IPR001841:Zinc finger, RING-type
LOC111393802	244.668	5.81976	56.4835	0.424879	13.6974	1.05e-42	2.09e-41	XP_022875280.1	protein_YLS3-like	Olive	PF14368:Probable_lipid_transfer	IPR008949:Isoprenoid synthase domain superfamily
LOC111408288	7879.22	5.7618	54.2593	0.160813	35.8292	3.87e-281	2.71e-278	XP_022893833.1	probable_1-deoxy-D-xylulose-5-phosphate_synthase_2,_chloroplastic	Olive	PF13292:1-deoxy-D-xylulose-5-phosphate_synthase//PF02779:Transketolase,_pyrimidine_binding_domain//PF02780:Transketolase,_C-terminal_domain	IPR012677:Nucleotide-binding alpha-beta plait domain superfamily//IPR000504:RNA recognition motif domain//IPR035979:RNA-binding domain superfamily
LOC111408970	1131	5.75233	53.9043	0.213156	26.9864	2.13e-160	2.94e-158	XP_022894612.1	transcription_factor_bHLH18-like,_transcript_variant_X2	Olive		IPR015813:Pyruvate/Phosphoenolpyruvate kinase-like domain superfamily//IPR040442:Pyruvate kinase-like domain superfamily//IPR011037:Pyruvate kinase-like, insert domain superfamily//IPR001697:Pyruvate kinase//IPR015806:Pyruvate kinase, insert domain superfamily
LOC111374858	4208.66	5.70792	52.2702	0.152472	37.4359	1.02e-306	9.78e-304	XP_022853376.1	alcohol_dehydrogenase_class-3-like	Olive	PF08240:Alcohol_dehydrogenase_GroES-like_domain//PF00107:Zinc-binding_dehydrogenase	IPR033712:Pumilio, RNA binding domain//IPR001313:Pumilio RNA-binding repeat//IPR033133:Pumilio homology domain//IPR011989:Armadillo-like helical//IPR016024:Armadillo-type fold
LOC111370494	165.492	5.70735	52.2497	0.498839	11.4413	2.6e-30	3.47e-29	XP_022847981.1	tyrosine/DOPA_decarboxylase_1-like,_transcript_variant_X2	Olive	PF00282:Pyridoxal-dependent_decarboxylase_conserved_domain
LOC111399055	573.342	5.68205	51.3413	0.279923	20.2986	1.32e-91	7.1e-90	XP_022882041.1	heavy_metal-associated_isoprenylated_plant_protein_37,_transcript_variant_X2	Olive	PF00403:Heavy-metal-associated_domain	IPR024709:Putative O-fucosyltransferase, plant
LOC111407895	572.376	5.62482	49.3447	0.691837	8.13027	4.28e-16	3.05e-15	XP_022893367.1	probable_protein_ABIL5,_transcript_variant_X2	Olive		IPR024034:ATPase, F1/V1 complex, beta/alpha subunit, C-terminal//IPR020003:ATPase, alpha/beta subunit, nucleotide-binding domain, active site
LOC111388216	71.4377	5.49153	44.99	0.708898	7.74658	9.44e-15	6.23e-14	XP_022868672.1	AAA-ATPase_At3g50940-like	Olive	PF14363:Domain_associated_at_C-terminal_with_AAA//PF00004:ATPase_family_associated_with_various_cellular_activities_(AAA)	IPR036065:BolA-like superfamily
LOC111385010	6021.58	5.46408	44.142	0.162045	33.7195	2.99e-249	1.52e-246	XP_022865129.1	1-deoxy-D-xylulose_5-phosphate_reductoisomerase,_chloroplastic-like,_transcript_variant_X2	Olive	PF13288:DXP_reductoisomerase_C-terminal_domain//PF02670:1-deoxy-D-xylulose_5-phosphate_reductoisomerase//PF08436:1-deoxy-D-xylulose_5-phosphate_reductoisomerase_C-terminal_domain	IPR007834:DSS1/SEM1
LOC111379316	11210.5	5.42869	43.0724	0.121534	44.6682	0	0	XP_022858441.1	3-oxo-Delta(4,5)-steroid_5-beta-reductase-like	Olive
LOC111372389	640.797	5.40019	42.2299	0.254866	21.1884	1.22e-99	7.31e-98	XP_022850495.1	cytochrome_P450_78A5-like	Olive	PF00067:Cytochrome_P450	IPR029058:Alpha/Beta hydrolase fold//IPR000073:Alpha/beta hydrolase fold-1
LOC111380816	181.65	5.3854	41.7992	0.43606	12.3501	4.86e-35	7.6e-34	XP_022860239.1	glucan_endo-1,3-beta-D-glucosidase-like	Olive	PF07983:X8_domain//PF00332:Glycosyl_hydrolases_family_17	IPR017877:Myb-like domain//IPR009057:Homeobox-like domain superfamily
LOC111397603	132.307	5.38449	41.7729	0.505459	10.6527	1.69e-26	1.95e-25			Olive		IPR001179:FKBP-type peptidyl-prolyl cis-trans isomerase domain
LOC111366508	60.2653	5.216	37.1683	1.78661	2.9195	0.00350591	0.00749425	XP_022843018.1	transcription_factor_MYB26-like,_transcript_variant_X4	Olive	PF00249:Myb-like_DNA-binding_domain	IPR029044:Nucleotide-diphospho-sugar transferases
LOC111382495	59.2702	5.20697	36.9363	0.74871	6.95458	3.54e-12	1.98e-11	XP_022862262.1	zinc_finger_Ran-binding_domain-containing_protein_2-like,_transcript_variant_X2	Olive	PF00641:Zn-finger_in_Ran_binding_protein_and_others	IPR002048:EF-hand domain//IPR011992:EF-hand domain pair
LOC111374713	2048.63	5.18668	36.4206	0.196015	26.4606	2.76e-154	3.54e-152	XP_022853203.1	putative_lipid-transfer_protein_DIR1	Olive	PF14368:Probable_lipid_transfer	IPR029058:Alpha/Beta hydrolase fold//IPR000073:Alpha/beta hydrolase fold-1
LOC111366102	555.251	5.18061	36.2676	0.248508	20.8468	1.63e-96	9.34e-95	XP_022842525.1	auxin-binding_protein_ABP20-like	Olive	PF00190:Cupin	IPR029057:Phosphoribosyltransferase-like//IPR000836:Phosphoribosyltransferase domain
LOC111389816	7776.65	5.16986	35.9983	0.117836	43.8733	0	0	XP_022870562.1	geraniol_synthase,_chloroplastic-like	Olive	PF01397:Terpene_synthase,_N-terminal_domain//PF03936:Terpene_synthase_family,_metal_binding_domain	IPR016159:Cullin repeat-like-containing domain superfamily
LOC111391770	163.532	5.10793	34.4858	0.432619	11.807	3.59e-32	5.16e-31	XP_022872797.1	uncharacterized_LOC111391770,_transcript_variant_X2	Olive		IPR029066:PLP-binding barrel//IPR000183:Ornithine/DAP/Arg decarboxylase//IPR009006:Alanine racemase/group IV decarboxylase, C-terminal//IPR002985:Arginine decarboxylase//IPR022653:Orn/DAP/Arg decarboxylase 2, pyridoxal-phosphate binding site//IPR022657:Orn/DAP/Arg decarboxylase 2, conserved site
LOC111373356	168.897	5.09482	34.1738	0.422389	12.0619	1.68e-33	2.51e-32	XP_022851645.1	polygalacturonase-1_non-catalytic_subunit_beta-like	Olive	PF03181:BURP_domain	IPR004001:Actin, conserved site//IPR020902:Actin/actin-like conserved site//IPR004000:Actin family//IPR043129:ATPase, nucleotide binding domain
LOC111380145	188.486	5.03351	32.7521	0.39288	12.8118	1.41e-37	2.36e-36	XP_022859398.1	uncharacterized_LOC111380145	Olive	PF03763:Remorin,_C-terminal_region	IPR011051:RmlC-like cupin domain superfamily
LOC111401031	471.733	4.9255	30.3895	0.249318	19.7559	7.14e-87	3.54e-85	XP_022884333.1	transcription_factor_bHLH18-like,_transcript_variant_X2	Olive	PF00010:Helix-loop-helix_DNA-binding_domain
LOC111395482	312.83	4.91225	30.1117	0.297841	16.4929	4.13e-61	1.3e-59	XP_022877272.1	putative_potassium_transporter_12,_transcript_variant_X2	Olive	PF02705:K+_potassium_transporter
LOC111412542	73.2849	4.86984	29.2394	0.593024	8.21188	2.18e-16	1.58e-15	XP_022899245.1	cyclin-dependent_protein_kinase_inhibitor_SMR9-like	Olive
LOC111379384	639.262	4.85952	29.031	0.217643	22.328	1.98e-110	1.38e-108	XP_022858510.1	beta-caryophyllene_synthase-like	Olive	PF01397:Terpene_synthase,_N-terminal_domain//PF03936:Terpene_synthase_family,_metal_binding_domain
LOC111396448	158.147	4.84057	28.6522	0.411026	11.7768	5.14e-32	7.32e-31	XP_022878650.1	uncharacterized_LOC111396448	Olive
LOC111368333	1400.51	4.83928	28.6265	0.200126	24.1812	3.51e-129	3.21e-127	XP_022845331.1	36.4_kDa_proline-rich_protein-like	Olive	PF14547:Hydrophobic_seed_protein	IPR000232:Heat shock factor (HSF)-type, DNA-binding//IPR036390:Winged helix DNA-binding domain superfamily//IPR036388:Winged helix-like DNA-binding domain superfamily
LOC111386247	231.065	4.82679	28.3798	0.360499	13.3892	6.99e-41	1.31e-39		transcription_factor_MYB20-like	Olive		IPR029056:Ribokinase-like//IPR001805:Adenosine kinase
LOC111397447	676.087	4.79064	27.6775	0.207215	23.1192	2.97e-118	2.31e-116	XP_022880159.1	growth-regulating_factor_6-like	Olive	PF08879:WRC//PF08880:QLQ	IPR038511:TAP42/TAP46-like superfamily
LOC111411589	537.18	4.77009	27.286	0.226466	21.0632	1.73e-98	1.02e-96	XP_022897866.1	auxin-binding_protein_ABP20-like	Olive	PF00190:Cupin	IPR036426:Bulb-type lectin domain superfamily//IPR017441:Protein kinase, ATP binding site//IPR000719:Protein kinase domain//IPR024171:S-receptor-like serine/threonine-protein kinase//IPR001480:Bulb-type lectin domain//IPR011009:Protein kinase-like domain superfamily//IPR003609:PAN/Apple domain//IPR008271:Serine/threonine-protein kinase, active site
LOC111407357	409.213	4.71951	26.346	0.260656	18.1063	2.84e-73	1.11e-71	XP_022892548.1	protein_trichome_birefringence-like_36	Olive	PF14416:PMR5_N_terminal_Domain//PF13839:GDSL/SGNH-like_Acyl-Esterase_family_found_in_Pmr5_and_Cas1p
LOC111386717	83.1128	4.70054	26.0018	0.526754	8.9236	4.51e-19	3.75e-18		leucine-rich_repeat_receptor_protein_kinase_EMS1	Olive
LOC111407212	100.502	4.69575	25.9157	0.485746	9.66709	4.16e-22	4e-21	XP_022892326.1	probable_LRR_receptor-like_serine/threonine-protein_kinase_At5g45780,_transcript_variant_X2	Olive	PF13855:Leucine_rich_repeat//PF08263:Leucine_rich_repeat_N-terminal_domain//PF00069:Protein_kinase_domain	IPR043472:Macro domain-like//IPR002589:Macro domain
LOC111402793	134.076	4.58983	24.0812	0.424835	10.8038	3.3e-27	3.91e-26	XP_022886893.1	uncharacterized_LOC111402793	Olive	PF04043:Plant_invertase/pectin_methylesterase_inhibitor	IPR028889:Ubiquitin specific protease domain//IPR038765:Papain-like cysteine peptidase superfamily//IPR018200:Ubiquitin specific protease, conserved site
LOC111398768	1141.43	4.58033	23.9231	0.166117	27.573	2.35e-167	3.59e-165	XP_022881623.1	probable_aldo-keto_reductase_3	Olive	PF00248:Aldo/keto_reductase_family	IPR000008:C2 domain//IPR035892:C2 domain superfamily
LOC111393252	420.674	4.57406	23.8193	0.283399	16.14	1.34e-58	3.99e-57	XP_022874460.1	AT-hook_motif_nuclear-localized_protein_25-like	Olive	PF03479:Plants_and_Prokaryotes_Conserved_(PCC)_domain	IPR036249:Thioredoxin-like superfamily
LOC111375818	248.709	4.55764	23.5498	0.757943	6.01317	1.82e-09	8.32e-09		endoglucanase_17-like	Olive		IPR002048:EF-hand domain//IPR011992:EF-hand domain pair
LOC111384490	116.069	4.53298	23.1507	0.448325	10.1109	4.94e-24	5.15e-23		uncharacterized_LOC111384490	Olive		IPR006196:RNA-binding domain, S1, IF1 type//IPR012340:Nucleic acid-binding, OB-fold//IPR001253:Translation initiation factor 1A (eIF-1A)//IPR018104:Translation initiation factor 1A (eIF-1A), conserved site
LOC111372156	88.2755	4.47924	22.3042	0.523818	8.55114	1.22e-17	9.45e-17	XP_022850120.1	putative_cyclin-D6-1,_transcript_variant_X2	Olive	PF00134:Cyclin,_N-terminal_domain//PF02984:Cyclin,_C-terminal_domain
LOC111403689	375.108	4.47189	22.1908	0.263123	16.9954	8.88e-65	2.97e-63	XP_022888051.1	probable_inactive_receptor_kinase_At5g58300	Olive	PF08263:Leucine_rich_repeat_N-terminal_domain//PF00560:Leucine_Rich_Repeat//PF07714:Protein_tyrosine_kinase
LOC111393143	105.187	4.43278	21.5973	0.46555	9.5216	1.71e-21	1.59e-20	XP_022874302.1	transcription_repressor_OFP8-like	Olive	PF04844:Transcriptional_repressor,_ovate
LOC111396030	7902.44	4.41547	21.3398	0.118377	37.3001	1.63e-304	1.49e-301	XP_022878073.1	alcohol_dehydrogenase-like_1,_transcript_variant_X4	Olive	PF08240:Alcohol_dehydrogenase_GroES-like_domain//PF00107:Zinc-binding_dehydrogenase	IPR036047:F-box-like domain superfamily
LOC111389454	169.459	4.41037	21.2645	0.360242	12.2428	1.84e-34	2.82e-33		probable_leucine-rich_repeat_receptor-like_protein_kinase_At1g68400	Olive		IPR032675:Leucine-rich repeat domain superfamily
LOC111404062	217.227	4.4061	21.2016	0.31195	14.1244	2.69e-45	5.76e-44		uncharacterized_LOC111404062	Olive		IPR036691:Endonuclease/exonuclease/phosphatase superfamily//IPR000300:Inositol polyphosphate-related phosphatase
LOC111412409	80.8857	4.39641	21.0596	0.49502	8.88128	6.61e-19	5.44e-18	XP_022899100.1	classical_arabinogalactan_protein_26-like	Olive		IPR036935:Ribosomal protein L9, N-terminal domain superfamily//IPR020594:Ribosomal protein L9, bacteria/chloroplast//IPR036791:Ribosomal protein L9, C-terminal domain superfamily//IPR020070:Ribosomal protein L9, N-terminal//IPR009027:Ribosomal protein L9/RNase H1, N-terminal
LOC111391368	4484.46	4.38965	20.9613	0.126491	34.7033	7.03e-264	4e-261	XP_022872333.1	salicylic_acid-binding_protein_2-like	Olive	PF12146:Serine_aminopeptidase,_S33	IPR002885:Pentatricopeptide repeat//IPR011990:Tetratricopeptide-like helical domain superfamily
LOC111391877	215.587	4.34836	20.3698	0.309961	14.0287	1.04e-44	2.19e-43	XP_022872953.1	monocopper_oxidase-like_protein_SKS1	Olive	PF00394:Multicopper_oxidase//PF07731:Multicopper_oxidase//PF07732:Multicopper_oxidase	IPR042277:Vacuolar protein sorting-associated protein IST1-like
LOC111397236	202.042	4.33273	20.1503	0.327563	13.2272	6.11e-40	1.11e-38	XP_022879822.1	transcription_factor_bHLH93-like	Olive	PF00010:Helix-loop-helix_DNA-binding_domain	IPR036812:NADP-dependent oxidoreductase domain superfamily//IPR020471:Aldo/keto reductase//IPR018170:Aldo/keto reductase, conserved site//IPR023210:NADP-dependent oxidoreductase domain
LOC111365272	574.29	4.27818	19.4027	0.215109	19.8884	5.13e-88	2.61e-86	XP_022841482.1	thaumatin-like_protein	Olive	PF00314:Thaumatin_family
LOC111406943	56.1944	4.27652	19.3803	0.591012	7.23593	4.62e-13	2.74e-12	XP_022892064.1	auxin_efflux_carrier_component_5-like	Olive	PF03547:Membrane_transport_protein
LOC111387509	120.92	4.24182	18.9197	0.404257	10.4929	9.32e-26	1.04e-24	XP_022867837.1	G-type_lectin_S-receptor-like_serine/threonine-protein_kinase_SD2-5	Olive	PF00069:Protein_kinase_domain//PF01453:D-mannose_binding_lectin
LOC111405437	735.413	4.22126	18.6521	0.199416	21.1682	1.88e-99	1.12e-97	XP_022890084.1	probable_pectate_lyase_13,_transcript_variant_X2	Olive	PF00544:Pectate_lyase	IPR020476:NUDIX hydrolase//IPR022927:RNA pyrophosphohydrolase RppH//IPR020084:NUDIX hydrolase, conserved site//IPR000086:NUDIX hydrolase domain//IPR015797:NUDIX hydrolase-like domain superfamily
LOC111403975	70.3543	4.2154	18.5764	0.568004	7.42143	1.16e-13	7.11e-13	XP_022888440.1	lysosomal_Pro-X_carboxypeptidase-like	Olive	PF05577:Serine_carboxypeptidase_S28
LOC111371732	122.426	4.1848	18.1865	0.393401	10.6375	1.99e-26	2.29e-25	XP_022849636.1	auxin_response_factor_9-like,_transcript_variant_X3	Olive	PF06507:Auxin_response_factor//PF02362:B3_DNA_binding_domain	IPR005202:Transcription factor GRAS
LOC111380164	133.468	4.17407	18.0518	0.376012	11.1009	1.24e-28	1.57e-27	XP_022859421.1	subtilisin-like_protease_SBT1.1	Olive	PF05922:Peptidase_inhibitor_I9//PF00082:Subtilase_family//PF17766:Fibronectin_type-III_domain//PF02225:PA_domain	IPR006539:P-type ATPase, subfamily IV//IPR001757:P-type ATPase//IPR008250:P-type ATPase, A domain superfamily//IPR018303:P-type ATPase, phosphorylation site//IPR036412:HAD-like superfamily//IPR023299:P-type ATPase, cytoplasmic domain N//IPR023214:HAD superfamily//IPR023298:P-type ATPase, transmembrane domain superfamily
LOC111384463	496.191	4.12978	17.5061	0.227893	18.1216	2.15e-73	8.41e-72	XP_022864508.1	protein_LIGHT-DEPENDENT_SHORT_HYPOCOTYLS_10-like,_transcript_variant_X3	Olive	PF04852:Protein_of_unknown_function_(DUF640)
LOC111395912	420.512	4.10595	17.2193	0.228594	17.9618	3.88e-72	1.49e-70	XP_022877900.1	heavy_metal-associated_isoprenylated_plant_protein_7-like,_transcript_variant_X2	Olive	PF00403:Heavy-metal-associated_domain	IPR011009:Protein kinase-like domain superfamily//IPR000719:Protein kinase domain//IPR008271:Serine/threonine-protein kinase, active site
LOC111390562	6742.45	4.09837	17.1291	0.188083	21.7903	2.87e-105	1.84e-103	XP_022871389.1	1-aminocyclopropane-1-carboxylate_oxidase_homolog_1-like	Olive	PF14226:non-haem_dioxygenase_in_morphine_synthesis_N-terminal//PF03171:2OG-Fe(II)_oxygenase_superfamily	IPR036576:WRKY domain superfamily//IPR003657:WRKY domain//IPR017396:WRKY transcription factor, group IIc
LOC111382660	4002.51	4.06869	16.7802	0.135853	29.9491	4.51e-197	1.05e-194		protein_RICE_SALT_SENSITIVE_3-like	Olive
LOC111380262	61.0808	4.05431	16.6138	0.541904	7.4816	7.34e-14	4.56e-13	XP_022859544.1	transcription_factor_SCREAM2-like,_transcript_variant_X4	Olive
LOC111396173	445.692	4.05157	16.5822	0.217377	18.6384	1.57e-77	6.69e-76	XP_022878277.1	polygalacturonase_At1g48100-like	Olive	PF00295:Glycosyl_hydrolases_family_28
LOC111388996	2514.49	4.0419	16.4715	0.13309	30.3696	1.39e-202	3.76e-200	XP_022869598.1	deacetoxyvindoline_4-hydroxylase-like	Olive
LOC111384838	256.018	4.02825	16.3164	0.271809	14.8202	1.09e-49	2.61e-48	XP_022864937.1	probable_leucine-rich_repeat_receptor-like_protein_kinase_At1g68400	Olive	PF08263:Leucine_rich_repeat_N-terminal_domain//PF00069:Protein_kinase_domain
LOC111390449	15603.8	4.02461	16.2753	0.10244	39.2874	0	0	XP_022871266.1	farnesoic_acid_carboxyl-O-methyltransferase-like	Olive	PF03492:SAM_dependent_carboxyl_methyltransferase	IPR027417:P-loop containing nucleoside triphosphate hydrolase
LOC111372210	340.51	4.00629	16.0699	0.656272	6.10461	1.03e-09	4.81e-09	XP_022850203.1	probable_pectate_lyase_12	Olive	PF00544:Pectate_lyase
LOC111396182	190.412	4.0018	16.02	0.308402	12.9759	1.68e-38	2.91e-37			Olive
LOC111383969	430.59	3.98932	15.882	0.219901	18.1415	1.5e-73	5.89e-72	XP_022863939.1	uncharacterized_LOC111383969	Olive
LOC111406266	292.992	3.98609	15.8465	0.248749	16.0245	8.61e-58	2.53e-56	XP_022891359.1	ABC_transporter_C_family_member_8	Olive	PF00005:ABC_transporter//PF00664:ABC_transporter_transmembrane_region	IPR002130:Cyclophilin-type peptidyl-prolyl cis-trans isomerase domain//IPR029000:Cyclophilin-like domain superfamily//IPR020892:Cyclophilin-type peptidyl-prolyl cis-trans isomerase, conserved site
LOC111402205	3143.76	3.98536	15.8385	0.125913	31.6518	7.17e-220	2.41e-217	XP_022886134.1	1-deoxy-D-xylulose_5-phosphate_reductoisomerase,_chloroplastic-like	Olive	PF08436:1-deoxy-D-xylulose_5-phosphate_reductoisomerase_C-terminal_domain//PF13288:DXP_reductoisomerase_C-terminal_domain//PF02670:1-deoxy-D-xylulose_5-phosphate_reductoisomerase
LOC111377224	15551	3.98244	15.8064	0.100229	39.7332	0	0	XP_022856055.1	probable_inactive_purple_acid_phosphatase_27	Olive	PF14008:Iron/zinc_purple_acid_phosphatase-like_protein_C//PF00149:Calcineurin-like_phosphoesterase//PF17808:Fn3-like_domain_from_Purple_Acid_Phosphatase	IPR023828:Peptidase S8, subtilisin, Ser-active site//IPR036852:Peptidase S8/S53 domain superfamily
LOC111411634	8837.6	3.93816	15.3286	0.109723	35.8916	4.12e-282	3.01e-279	XP_022897920.1	aspartyl_protease_AED3-like,_transcript_variant_X2	Olive	PF14541:Xylanase_inhibitor_C-terminal//PF14543:Xylanase_inhibitor_N-terminal	IPR024709:Putative O-fucosyltransferase, plant
LOC111404447	391.2	3.91712	15.1067	0.261589	14.9743	1.08e-50	2.64e-49		uncharacterized_protein_LOC111404447	Olive
LOC111388612	1319.18	3.88464	14.7704	0.217035	17.8987	1.21e-71	4.56e-70	XP_022869136.1	expansin-B3-like	Olive	PF01357:Pollen_allergen//PF03330:Lytic_transglycolase	IPR017441:Protein kinase, ATP binding site//IPR000961:AGC-kinase, C-terminal//IPR011009:Protein kinase-like domain superfamily//IPR008271:Serine/threonine-protein kinase, active site//IPR000719:Protein kinase domain
LOC111405349	389.827	3.87682	14.6906	0.222902	17.3925	9.41e-68	3.3e-66	XP_022889945.1	kinase-interacting_family_protein-like,_transcript_variant_X2	Olive	PF07765:KIP1-like_protein	IPR000850:Adenylate kinase/UMP-CMP kinase//IPR033690:Adenylate kinase, conserved site//IPR027417:P-loop containing nucleoside triphosphate hydrolase//IPR006259:Adenylate kinase subfamily
LOC111366324	262.723	3.87425	14.6644	0.287931	13.4555	2.86e-41	5.43e-40	XP_022842833.1	phospholipase_A2-alpha-like	Olive
LOC111370381	5812.2	3.86755	14.5965	0.174006	22.2266	1.9e-109	1.31e-107	XP_022847830.1	36.4_kDa_proline-rich_protein-like	Olive	PF14547:Hydrophobic_seed_protein
LOC111406065	1642.7	3.83487	14.2695	0.140432	27.3077	3.43e-164	5.07e-162	XP_022891025.1	protein_EXORDIUM-like_3	Olive	PF04674:Phosphate-induced_protein_1_conserved_region	IPR023214:HAD superfamily//IPR006357:HAD-superfamily hydrolase, subfamily IIA//IPR036412:HAD-like superfamily//IPR006353:HAD-superfamily hydrolase, subfamily IIA, CECR5
LOC111402101	106.116	3.81865	14.11	0.392275	9.73462	2.15e-22	2.09e-21	XP_022885949.1	serine_carboxypeptidase-like_45,_transcript_variant_X2	Olive	PF00450:Serine_carboxypeptidase	IPR008271:Serine/threonine-protein kinase, active site//IPR017441:Protein kinase, ATP binding site//IPR000719:Protein kinase domain//IPR011009:Protein kinase-like domain superfamily
LOC111396908	386.422	3.79987	13.9276	0.282514	13.4502	3.07e-41	5.81e-40	XP_022879281.1	triacylglycerol_lipase_2-like,_transcript_variant_X3	Olive	PF00561:alpha/beta_hydrolase_fold	IPR015943:WD40/YVTN repeat-like-containing domain superfamily//IPR011047:Quinoprotein alcohol dehydrogenase-like superfamily
LOC111381921	1430.06	3.7944	13.8748	0.174111	21.793	2.71e-105	1.74e-103	XP_022861541.1	auxin_response_factor_9-like	Olive	PF02309:AUX/IAA_family//PF02362:B3_DNA_binding_domain//PF06507:Auxin_response_factor
LOC111369455	50.6853	3.76409	13.5864	0.553128	6.8051	1.01e-11	5.47e-11	XP_022846742.1	leucine-rich_repeat_receptor-like_protein_kinase_PXC1	Olive	PF00069:Protein_kinase_domain//PF08263:Leucine_rich_repeat_N-terminal_domain	IPR006620:Prolyl 4-hydroxylase, alpha subunit//IPR003582:ShKT domain//IPR005123:Oxoglutarate/iron-dependent dioxygenase
LOC111397114	601.839	3.75502	13.5012	0.189859	19.778	4.61e-87	2.3e-85	XP_022879627.1	uncharacterized_LOC111397114	Olive	PF04862:Protein_of_unknown_function_(DUF642)	IPR003388:Reticulon
LOC111382896	540.059	3.73259	13.293	0.188679	19.7828	4.19e-87	2.1e-85	XP_022862699.1	heavy_metal-associated_isoprenylated_plant_protein_33-like	Olive		IPR000719:Protein kinase domain//IPR017441:Protein kinase, ATP binding site//IPR011009:Protein kinase-like domain superfamily
LOC111385592	192.512	3.72998	13.2689	0.284098	13.1292	2.24e-39	4.01e-38		auxin_response_factor_4-like	Olive		IPR002554:Protein phosphatase 2A, regulatory B subunit, B56//IPR016024:Armadillo-type fold//IPR011989:Armadillo-like helical
LOC111410752	71.3085	3.72543	13.2271	0.461115	8.07918	6.52e-16	4.59e-15	XP_022897023.1	zinc-finger_homeodomain_protein_4-like	Olive	PF04770:ZF-HD_protein_dimerisation_region	IPR010920:LSM domain superfamily
LOC111393813	801.3	3.71407	13.1234	0.160619	23.1236	2.68e-118	2.09e-116	XP_022875297.1	probable_aquaporin_TIP1-2	Olive	PF00230:Major_intrinsic_protein
LOC111394817	149.77	3.70813	13.0695	0.3187	11.6352	2.73e-31	3.8e-30	XP_022876597.1	protein_UPSTREAM_OF_FLC-like	Olive	PF06136:Domain_of_unknown_function_(DUF966)
LOC111382430	134.076	3.7061	13.0511	0.334402	11.0828	1.52e-28	1.91e-27	XP_022862172.1	polygalacturonase_At1g48100-like	Olive	PF00295:Glycosyl_hydrolases_family_28
LOC111387578	2643.72	3.69155	12.9202	0.143005	25.8141	6.16e-147	7.14e-145	XP_022867920.1	glucan_endo-1,3-beta-glucosidase_11-like,_transcript_variant_X3	Olive	PF00332:Glycosyl_hydrolases_family_17
LOC111386059	293.261	3.66899	12.7197	0.248069	14.7902	1.69e-49	4.05e-48	XP_022866256.1	cytokinin_dehydrogenase_9-like	Olive	PF01565:FAD_binding_domain//PF09265:Cytokinin_dehydrogenase_1,_FAD_and_cytokinin_binding	IPR036008:Aconitase, iron-sulfur domain//IPR001030:Aconitase/3-isopropylmalate dehydratase large subunit, alpha/beta/alpha domain//IPR015931:Aconitase/3-isopropylmalate dehydratase large subunit, alpha/beta/alpha, subdomain 1/3//IPR015928:Aconitase/3-isopropylmalate dehydratase, swivel
LOC111385880	5470.68	3.66664	12.699	0.118282	30.9991	5.55e-211	1.68e-208	XP_022866095.1	glutathione_S-transferase_DHAR2-like	Olive	PF13410:Glutathione_S-transferase,_C-terminal_domain//PF13417:Glutathione_S-transferase,_N-terminal_domain
LOC111407444	333.263	3.65605	12.6061	0.224229	16.305	9.1e-60	2.78e-58	XP_022892678.1	U-box_domain-containing_protein_45-like,_transcript_variant_X2	Olive		IPR001898:Solute carrier family 13
LOC111383935	184.629	3.65259	12.5759	0.313376	11.6556	2.15e-31	3e-30		uncharacterized_LOC111383935	Olive
LOC111371198	84.4277	3.64875	12.5425	0.428409	8.51697	1.64e-17	1.26e-16	XP_022848866.1	uncharacterized_LOC111371198	Olive
LOC111371757	100.89	3.64388	12.5002	0.384539	9.47597	2.64e-21	2.44e-20	XP_022849665.1	uncharacterized_protein_At5g39865-like	Olive	PF00462:Glutaredoxin	IPR017441:Protein kinase, ATP binding site//IPR000719:Protein kinase domain//IPR003527:Mitogen-activated protein (MAP) kinase, conserved site//IPR011009:Protein kinase-like domain superfamily//IPR008271:Serine/threonine-protein kinase, active site
LOC111373704	364.859	3.63754	12.4454	0.21409	16.9907	9.62e-65	3.21e-63	XP_022852049.1	transcription_factor_bHLH71-like	Olive	PF00010:Helix-loop-helix_DNA-binding_domain	IPR035595:UDP-glycosyltransferase family, conserved site
LOC111398275	463.988	3.58806	12.0258	0.223643	16.0437	6.33e-58	1.86e-56		secologanin_synthase-like	Olive		IPR002885:Pentatricopeptide repeat//IPR011990:Tetratricopeptide-like helical domain superfamily
LOC111402429	818.919	3.58375	11.9899	0.168136	21.3146	8.32e-101	5.03e-99	XP_022886492.1	protein_DETOXIFICATION_40-like,_transcript_variant_X2	Olive	PF01554:MatE	IPR033140:Lipase, GDXG, putative serine active site//IPR029058:Alpha/Beta hydrolase fold//IPR002168:Lipase, GDXG, putative histidine active site
LOC111373825	178.566	3.53589	11.5987	0.284515	12.4278	1.85e-35	2.93e-34		uncharacterized_protein_LOC111373825	Olive		IPR012337:Ribonuclease H-like superfamily
LOC111396145	515.325	3.53555	11.5959	0.18148	19.4817	1.57e-84	7.54e-83	XP_022878232.1	squamosa_promoter-binding-like_protein_12,_transcript_variant_X7	Olive	PF03110:SBP_domain
LOC111408011	386.991	3.53425	11.5855	0.217908	16.219	3.7e-59	1.12e-57	XP_022893522.1	uncharacterized_LOC111408011	Olive
LOC111370877	132.355	3.51568	11.4374	0.333015	10.5571	4.71e-26	5.34e-25	XP_022848547.1	uncharacterized_LOC111370877	Olive		IPR013083:Zinc finger, RING/FYVE/PHD-type//IPR011011:Zinc finger, FYVE/PHD-type//IPR001965:Zinc finger, PHD-type//IPR019786:Zinc finger, PHD-type, conserved site//IPR019787:Zinc finger, PHD-finger
LOC111405952	1388.63	3.50728	11.371	0.14764	23.7556	9.62e-125	8.11e-123	XP_022890851.1	patellin-6	Olive	PF00650:CRAL/TRIO_domain//PF03765:CRAL/TRIO,_N-terminal_domain
LOC111367652	170.809	3.50435	11.3479	0.332784	10.5304	6.26e-26	7.04e-25	XP_022844406.1	myb-related_protein_Zm1-like	Olive	PF00249:Myb-like_DNA-binding_domain	IPR006045:Cupin 1//IPR001929:Germin//IPR014710:RmlC-like jelly roll fold//IPR019780:Germin, manganese binding site//IPR011051:RmlC-like cupin domain superfamily
LOC111390474	695.147	3.50305	11.3377	0.177618	19.7224	1.39e-86	6.86e-85	XP_022871290.1	auxin_response_factor_9-like	Olive	PF02309:AUX/IAA_family//PF02362:B3_DNA_binding_domain//PF06507:Auxin_response_factor
LOC111396179	916.974	3.50245	11.333	0.151202	23.1641	1.05e-118	8.23e-117	XP_022878287.1	polygalacturonase-1_non-catalytic_subunit_beta-like	Olive	PF03181:BURP_domain
LOC111411895	338.691	3.49911	11.3067	0.219894	15.9127	5.17e-57	1.48e-55	XP_022898323.1	pectinesterase_inhibitor_3-like	Olive	PF04043:Plant_invertase/pectin_methylesterase_inhibitor
LOC111370878	1273.02	3.49662	11.2873	0.146246	23.9092	2.46e-126	2.14e-124	XP_022848548.1	polyphenol_oxidase_I,_chloroplastic-like	Olive	PF12143:Protein_of_unknown_function_(DUF_B2219)//PF12142:Polyphenol_oxidase_middle_domain//PF00264:Common_central_domain_of_tyrosinase
LOC111407276	1123.25	3.49355	11.2632	0.146018	23.9255	1.66e-126	1.46e-124	XP_022892428.1	uncharacterized_LOC111407276	Olive	PF04862:Protein_of_unknown_function_(DUF642)
LOC111387575	449.233	3.49353	11.263	0.190474	18.3412	3.88e-75	1.59e-73	XP_022867913.1	NAC_domain-containing_protein_43-like	Olive	PF02365:No_apical_meristem_(NAM)_protein
LOC111366238	264.364	3.48746	11.2158	0.250275	13.9345	3.91e-44	8.07e-43	XP_022842721.1	uncharacterized_LOC111366238,_transcript_variant_X2	Olive		IPR042529:Initiation factor 2B-like, C-terminal//IPR037171:NagB/RpiA transferase-like//IPR005251:Methylthioribose-1-phosphate isomerase//IPR011559:Initiation factor 2B alpha/beta/delta
LOC111393814	752.129	3.47475	11.1174	0.156695	22.1752	5.96e-109	4.07e-107	XP_022875299.1	probable_aquaporin_TIP1-2	Olive	PF00230:Major_intrinsic_protein
LOC111385751	341.299	3.4705	11.0847	0.225782	15.371	2.56e-53	6.7e-52	XP_022865935.1	probable_inactive_receptor_kinase_At5g67200	Olive	PF13855:Leucine_rich_repeat//PF00069:Protein_kinase_domain	IPR036249:Thioredoxin-like superfamily//IPR002109:Glutaredoxin//IPR014025:Glutaredoxin subgroup//IPR011899:Glutaredoxin, eukaryotic/virial
LOC111396207	141.543	3.45342	10.9543	0.313072	11.0308	2.72e-28	3.39e-27	XP_022878328.1	HVA22-like_protein_a	Olive	PF03134:TB2/DP1,_HVA22_family
LOC111383159	972.328	3.44941	10.9239	0.148492	23.2297	2.28e-119	1.82e-117	XP_022863005.1	nitrate_regulatory_gene2_protein-like	Olive	PF04782:Protein_of_unknown_function_(DUF632)//PF04783:Protein_of_unknown_function_(DUF630)	IPR011009:Protein kinase-like domain superfamily//IPR017441:Protein kinase, ATP binding site//IPR000719:Protein kinase domain//IPR008271:Serine/threonine-protein kinase, active site
LOC111372323	113.042	3.44317	10.8767	0.42424	8.11609	4.81e-16	3.41e-15	XP_022850376.1	thaumatin-like_protein	Olive	PF00314:Thaumatin_family
LOC111376232	143.134	3.44129	10.8626	0.343284	10.0246	1.19e-23	1.22e-22	XP_022855037.1	probable_RNA-binding_protein_ARP1,_transcript_variant_X2	Olive	PF00076:RNA_recognition_motif._(a.k.a._RRM,_RBD,_or_RNP_domain)
LOC111371288	525.557	3.4353	10.8175	0.178657	19.2284	2.14e-82	9.97e-81	XP_022848955.1	putative_lipid-transfer_protein_DIR1	Olive	PF14368:Probable_lipid_transfer	IPR027417:P-loop containing nucleoside triphosphate hydrolase
LOC111390750	122.881	3.43469	10.813	0.388546	8.83986	9.58e-19	7.83e-18	XP_022871623.1	aspartyl_protease_family_protein_2-like	Olive	PF14541:Xylanase_inhibitor_C-terminal//PF14543:Xylanase_inhibitor_N-terminal
LOC111380381	204.644	3.43335	10.8029	0.264038	13.0032	1.17e-38	2.05e-37	XP_022859693.1	glucomannan_4-beta-mannosyltransferase_2-like	Olive	PF00535:Glycosyl_transferase_family_2
LOC111411772	131.387	3.43286	10.7992	0.359086	9.56	1.18e-21	1.1e-20	XP_022898140.1	glucan_endo-1,3-beta-glucosidase_3-like,_transcript_variant_X2	Olive	PF07983:X8_domain
LOC111404180	541.088	3.42581	10.7466	0.205009	16.7106	1.1e-62	3.54e-61	XP_022888715.1	uncharacterized_LOC111404180	Olive		IPR002912:ACT domain//IPR018528:Prephenate dehydratase, conserved site//IPR001086:Prephenate dehydratase
LOC111405283	1205.02	3.42175	10.7164	0.232044	14.7461	3.26e-49	7.75e-48	XP_022889862.1	nucleobase-ascorbate_transporter_6-like,_transcript_variant_X3	Olive	PF00860:Permease_family
LOC111369931	7049.98	3.41648	10.6773	0.217243	15.7265	9.96e-56	2.76e-54	XP_022847432.1	4-hydroxy-3-methylbut-2-en-1-yl_diphosphate_synthase_(ferredoxin),_chloroplastic-like	Olive	PF04551:GcpE_protein
LOC111386274	1069.09	3.41499	10.6663	0.150357	22.7125	3.37e-114	2.45e-112	XP_022866505.1	protein_EXORDIUM-like_3	Olive	PF04674:Phosphate-induced_protein_1_conserved_region
LOC111379297	148.039	3.40774	10.6129	0.344985	9.87796	5.19e-23	5.18e-22	XP_022858425.1	G2/mitotic-specific_cyclin-2-like,_transcript_variant_X3	Olive	PF00134:Cyclin,_N-terminal_domain//PF02984:Cyclin,_C-terminal_domain	IPR006195:Aminoacyl-tRNA synthetase, class II//IPR002315:Glycyl-tRNA synthetase//IPR033731:Glycyl-tRNA synthetase-like core domain//IPR036621:Anticodon-binding domain superfamily
LOC111402356	98.8201	3.40146	10.5668	0.389236	8.73882	2.36e-18	1.89e-17	XP_022886357.1	PLASMODESMATA_CALLOSE-BINDING_PROTEIN_2-like	Olive	PF07983:X8_domain	IPR013087:Zinc finger C2H2-type//IPR036236:Zinc finger C2H2 superfamily
LOC111399422	63.5662	3.3902	10.4846	0.459105	7.38437	1.53e-13	9.35e-13	XP_022882497.1	probable_pectinesterase_53	Olive	PF01095:Pectinesterase	IPR001985:S-adenosylmethionine decarboxylase//IPR018166:S-adenosylmethionine decarboxylase, conserved site//IPR016067:S-adenosylmethionine decarboxylase, core
LOC111365909	316.353	3.37814	10.3973	0.228137	14.8075	1.31e-49	3.15e-48	XP_022842235.1	tubby-like_protein_8	Olive	PF01167:Tub_family
LOC111379232	5751.41	3.37582	10.3806	0.115296	29.2796	1.89e-188	3.92e-186	XP_022858342.1	geraniol_8-hydroxylase-like	Olive	PF00067:Cytochrome_P450	IPR029752:D-isomer specific 2-hydroxyacid dehydrogenase, NAD-binding domain conserved site 1//IPR036291:NAD(P)-binding domain superfamily
LOC111409883	125.225	3.36187	10.2807	0.324666	10.3549	3.98e-25	4.33e-24	XP_022895746.1	titin_homolog	Olive		IPR023210:NADP-dependent oxidoreductase domain//IPR036812:NADP-dependent oxidoreductase domain superfamily
LOC111389762	102.127	3.3319	10.0694	0.370198	9.00033	2.25e-19	1.9e-18	XP_022870496.1	protein_S-acyltransferase_18	Olive	PF01529:DHHC_palmitoyltransferase
LOC111373450	252.428	3.33002	10.0562	0.23933	13.914	5.21e-44	1.07e-42	XP_022851749.1	L-ascorbate_oxidase_homolog	Olive	PF07732:Multicopper_oxidase//PF00394:Multicopper_oxidase//PF07731:Multicopper_oxidase
LOC111390895	6920.31	3.32655	10.0321	0.156079	21.3132	8.56e-101	5.17e-99	XP_022871786.1	NADPH--cytochrome_P450_reductase-like	Olive	PF00667:FAD_binding_domain//PF00175:Oxidoreductase_NAD-binding_domain//PF00258:Flavodoxin	IPR006186:Serine/threonine-specific protein phosphatase/bis(5-nucleosyl)-tetraphosphatase//IPR015915:Kelch-type beta propeller//IPR041758:Phosphatase BSL, C-terminal metallophosphatase domain//IPR012391:Serine/threonine protein phosphatase, BSU1//IPR029052:Metallo-dependent phosphatase-like
LOC111393522	607.908	3.31726	9.9677	0.17807	18.6289	1.87e-77	7.96e-76	XP_022874855.1	expansin-A4-like	Olive	PF01357:Pollen_allergen//PF03330:Lytic_transglycolase	IPR038770:Sodium/solute symporter superfamily
LOC111386361	1470.64	3.31622	9.96054	0.133016	24.931	3.43e-137	3.46e-135	XP_022866584.1	D-3-phosphoglycerate_dehydrogenase_2,_chloroplastic-like	Olive	PF00389:D-isomer_specific_2-hydroxyacid_dehydrogenase,_catalytic_domain
LOC111398274	857.27	3.31455	9.94898	0.184664	17.9491	4.88e-72	1.86e-70		cytochrome_P450_CYP72A219-like	Olive		IPR001841:Zinc finger, RING-type//IPR013083:Zinc finger, RING/FYVE/PHD-type
LOC111403793	111.686	3.3076	9.90118	0.340974	9.70045	3e-22	2.9e-21	XP_022888181.1	spermidine_hydroxycinnamoyl_transferase-like	Olive	PF02458:Transferase_family	IPR000719:Protein kinase domain//IPR011009:Protein kinase-like domain superfamily//IPR008271:Serine/threonine-protein kinase, active site//IPR017441:Protein kinase, ATP binding site
LOC111365611	89.6856	3.29333	9.80374	0.394415	8.34991	6.83e-17	5.09e-16	XP_022841919.1	uncharacterized_protein_At3g28850	Olive	PF00462:Glutaredoxin	IPR038469:tRNAHis guanylyltransferase Thg1 superfamily
LOC111394266	82.4373	3.29111	9.78868	0.414477	7.94039	2.02e-15	1.38e-14		uncharacterized_protein_LOC111394266	Olive
LOC111367188	2089.9	3.27796	9.69985	0.133734	24.511	1.13e-132	1.08e-130	XP_022843702.1	vegetative_cell_wall_protein_gp1-like	Olive	PF01190:Pollen_proteins_Ole_e_I_like
LOC111411451	177.949	3.26105	9.58679	0.2827	11.5354	8.75e-31	1.19e-29	XP_022897751.1	E3_ubiquitin-protein_ligase_RNF181-like	Olive	PF13639:Ring_finger_domain	IPR012763:DNA polymerase III, subunit gamma/ tau//IPR027417:P-loop containing nucleoside triphosphate hydrolase//IPR003593:AAA+ ATPase domain
LOC111387124	177.25	3.25765	9.56426	0.279478	11.6562	2.13e-31	2.98e-30	XP_022867418.1	heterodimeric_geranylgeranyl_pyrophosphate_synthase_small_subunit,_chloroplastic-like	Olive		IPR002885:Pentatricopeptide repeat//IPR011990:Tetratricopeptide-like helical domain superfamily
LOC111406094	4552.43	3.25761	9.56395	0.154463	21.0899	9.85e-99	5.83e-97	XP_022891063.1	membrane_steroid-binding_protein_1-like	Olive	PF00173:Cytochrome_b5-like_Heme/Steroid_binding_domain
LOC111366033	217.445	3.24651	9.49067	0.248658	13.0561	5.87e-39	1.04e-37	XP_022842426.1	methylsterol_monooxygenase_1-1-like	Olive	PF04116:Fatty_acid_hydroxylase_superfamily
LOC111381167	353.289	3.22272	9.33545	0.219984	14.6498	1.35e-48	3.16e-47	XP_022860678.1	pectinesterase_inhibitor_7-like	Olive	PF04043:Plant_invertase/pectin_methylesterase_inhibitor	IPR005607:BSD domain//IPR035925:BSD domain superfamily
LOC111377909	285.659	3.21806	9.30535	0.229803	14.0036	1.48e-44	3.1e-43	XP_022856830.1	leucine-rich_repeat_receptor-like_protein_kinase_TDR	Olive	PF00069:Protein_kinase_domain//PF13855:Leucine_rich_repeat	IPR012004:Pyrophosphate-dependent phosphofructokinase TP0108-type//IPR022953:ATP-dependent 6-phosphofructokinase//IPR035966:Phosphofructokinase superfamily
LOC111378817	320.322	3.2053	9.22341	0.246818	12.9865	1.46e-38	2.54e-37	XP_022857856.1	cyclin-D3-1-like	Olive	PF02984:Cyclin,_C-terminal_domain//PF00134:Cyclin,_N-terminal_domain
LOC111393666	372.393	3.20272	9.20694	0.194775	16.4432	9.39e-61	2.93e-59	XP_022875089.1	interactor_of_constitutive_active_ROPs_3-like,_transcript_variant_X3	Olive		IPR015940:Ubiquitin-associated domain//IPR009060:UBA-like superfamily
LOC111396096	42379.6	3.20181	9.20112	0.112019	28.5827	1.1e-179	2.02e-177	XP_022878158.1	cytochrome_P450_CYP72A219-like	Olive	PF00067:Cytochrome_P450
LOC111369928	151.143	3.1874	9.10967	0.294711	10.8153	2.91e-27	3.47e-26	XP_022847429.1	fasciclin-like_arabinogalactan_protein_12	Olive	PF02469:Fasciclin_domain	IPR006580:Zinc finger, TTF-type//IPR012337:Ribonuclease H-like superfamily
LOC111383417	139.137	3.18473	9.09284	0.312222	10.2002	1.98e-24	2.1e-23	XP_022863293.1	G2/mitotic-specific_cyclin-2-like	Olive	PF02984:Cyclin,_C-terminal_domain//PF00134:Cyclin,_N-terminal_domain	IPR001736:Phospholipase D/Transphosphatidylase//IPR001849:Pleckstrin homology domain//IPR011993:PH-like domain superfamily//IPR016555:Phospholipase D, eukaryotic type
LOC111392454	59.2797	3.17259	9.01665	0.464361	6.83217	8.36e-12	4.56e-11	XP_022873572.1	vacuolar_protein_sorting-associated_protein_2_homolog_2-like	Olive	PF03357:Snf7	IPR023175:Vacuolar protein sorting-associate protein Vta1/Callose synthase, N-terminal//IPR026899:1,3-beta-glucan synthase subunit FKS1-like, domain-1
LOC111403500	582.212	3.17252	9.01618	0.17582	18.0441	8.78e-73	3.39e-71	XP_022887795.1	glucomannan_4-beta-mannosyltransferase_2-like	Olive	PF13632:Glycosyl_transferase_family_group_2	IPR000672:Tetrahydrofolate dehydrogenase/cyclohydrolase//IPR036291:NAD(P)-binding domain superfamily//IPR020867:Tetrahydrofolate dehydrogenase/cyclohydrolase, conserved site//IPR020631:Tetrahydrofolate dehydrogenase/cyclohydrolase, NAD(P)-binding domain
LOC111410672	803.874	3.16743	8.98442	0.17853	17.7417	2e-70	7.38e-69	XP_022896897.1	probable_1-acyl-sn-glycerol-3-phosphate_acyltransferase_5,_transcript_variant_X2	Olive	PF01553:Acyltransferase//PF16076:Acyltransferase_C-terminus
LOC111386126	32674.8	3.16407	8.96357	0.105843	29.8939	2.36e-196	5.3e-194	XP_022866331.1	cytochrome_P450_76A1-like	Olive	PF00067:Cytochrome_P450
LOC111389590	932.044	3.16342	8.95953	0.191359	16.5313	2.18e-61	6.91e-60	XP_022870285.1	glucan_endo-1,3-beta-glucosidase_1-like,_transcript_variant_X2	Olive	PF07983:X8_domain//PF00332:Glycosyl_hydrolases_family_17	IPR012337:Ribonuclease H-like superfamily//IPR036397:Ribonuclease H superfamily
LOC111409049	61.8334	3.15195	8.88858	0.453027	6.95754	3.46e-12	1.94e-11	XP_022894716.1	dof_zinc_finger_protein_DOF4.7-like	Olive	PF02701:Dof_domain,_zinc_finger	IPR006447:Myb domain, plants//IPR017930:Myb domain//IPR009057:Homeobox-like domain superfamily
LOC111403161	53.256	3.15083	8.88166	0.584316	5.39234	6.95e-08	2.75e-07	XP_022887330.1	fasciclin-like_arabinogalactan_protein_11	Olive	PF02469:Fasciclin_domain	IPR004827:Basic-leucine zipper domain
LOC111395247	211.668	3.14983	8.87553	0.245306	12.8404	9.73e-38	1.65e-36	XP_022877003.1	uncharacterized_protein_At1g66480-like	Olive	PF14009:Domain_of_unknown_function_(DUF4228)	IPR016177:DNA-binding domain superfamily//IPR001471:AP2/ERF domain//IPR036955:AP2/ERF domain superfamily
LOC111366378	167.286	3.14872	8.86868	0.276579	11.3845	5e-30	6.6e-29	XP_022842923.1	rac-like_GTP-binding_protein_ARAC7,_transcript_variant_X2	Olive	PF00071:Ras_family	IPR016050:Proteasome beta-type subunit, conserved site//IPR029055:Nucleophile aminohydrolases, N-terminal//IPR023333:Proteasome B-type subunit
LOC111379521	513.316	3.14088	8.82063	0.20994	14.9608	1.32e-50	3.22e-49	XP_022858682.1	reticulon-like_protein_B17,_transcript_variant_X4	Olive	PF02453:Reticulon	IPR023058:Peptidyl-prolyl cis-trans isomerase, PpiC-type, conserved site//IPR000297:Peptidyl-prolyl cis-trans isomerase, PpiC-type
LOC111371398	79.9612	3.13512	8.78546	0.387996	8.08028	6.46e-16	4.55e-15	XP_022849130.1	uncharacterized_LOC111371398,_transcript_variant_X2	Olive
LOC111396380	404.221	3.13228	8.76818	0.187506	16.7049	1.21e-62	3.88e-61	XP_022878585.1	DNA_damage-repair/toleration_protein_DRT100	Olive	PF13855:Leucine_rich_repeat//PF00560:Leucine_Rich_Repeat//PF08263:Leucine_rich_repeat_N-terminal_domain	IPR036691:Endonuclease/exonuclease/phosphatase superfamily
LOC111378157	175.508	3.12868	8.74632	0.267749	11.6851	1.52e-31	2.13e-30			Olive		IPR041966:LOTUS-like domain//IPR025605:OST-HTH/LOTUS domain
LOC111397162	152.672	3.1214	8.70234	0.288881	10.8052	3.25e-27	3.86e-26	XP_022879691.1	cytokinin_dehydrogenase_3-like	Olive	PF09265:Cytokinin_dehydrogenase_1,_FAD_and_cytokinin_binding//PF01565:FAD_binding_domain
LOC111403054	67.9983	3.12111	8.7006	0.450769	6.92398	4.39e-12	2.44e-11			Olive		IPR014729:Rossmann-like alpha/beta/alpha sandwich fold//IPR006015:Universal stress protein A family
LOC111384265	209.061	3.1211	8.70052	0.348768	8.94893	3.59e-19	2.99e-18	XP_022864296.1	21_kDa_protein-like	Olive	PF04043:Plant_invertase/pectin_methylesterase_inhibitor	IPR042266:PPPDE putative peptidase domain superfamily//IPR008580:PPPDE putative peptidase domain
LOC111407305	50.6026	3.10946	8.6306	0.546004	5.69494	1.23e-08	5.26e-08	XP_022892485.1	glycerophosphodiester_phosphodiesterase_GDPDL3-like,_transcript_variant_X2	Olive	PF03009:Glycerophosphoryl_diester_phosphodiesterase_family
LOC111409533	844.285	3.10642	8.61243	0.161633	19.219	2.57e-82	1.19e-80	XP_022895341.1	ABC_transporter_B_family_member_19-like	Olive	PF00005:ABC_transporter//PF00664:ABC_transporter_transmembrane_region	IPR029058:Alpha/Beta hydrolase fold
LOC111406684	1520.98	3.10101	8.58017	0.147113	21.0791	1.24e-98	7.31e-97	XP_022891837.1	tubulin_beta-1_chain	Olive	PF03953:Tubulin_C-terminal_domain//PF00091:Tubulin/FtsZ_family,_GTPase_domain
LOC111376911	169.968	3.09871	8.56649	0.401534	7.71717	1.19e-14	7.8e-14		alpha-1,4-glucan-protein_synthase_[UDP-forming]_2-like	Olive
LOC111409048	340.162	3.09126	8.52243	0.209237	14.7739	2.16e-49	5.15e-48	XP_022894715.1	HMG-Y-related_protein_A-like	Olive	PF00538:linker_histone_H1_and_H5_family	IPR033118:EXPERA domain//IPR016964:Sigma intracellular receptor 2
LOC111401388	196.122	3.08907	8.5095	0.318957	9.68494	3.49e-22	3.37e-21	XP_022884868.1	blue_copper_protein-like	Olive	PF02298:Plastocyanin-like_domain	IPR018088:Chalcone/stilbene synthase, active site//IPR016039:Thiolase-like
LOC111387812	1427.91	3.08323	8.47509	0.150691	20.4605	4.84e-93	2.65e-91	XP_022868169.1	alpha-xylosidase_1-like	Olive	PF16863:N-terminal_barrel_of_NtMGAM_and_CtMGAM,_maltase-glucoamylase//PF13802:Galactose_mutarotase-like//PF01055:Glycosyl_hydrolases_family_31
LOC111394924	77.0818	3.08157	8.46538	0.394426	7.8128	5.59e-15	3.74e-14	XP_022876739.1	bZIP_transcription_factor_11-like	Olive	PF00170:bZIP_transcription_factor
LOC111405750	273.635	3.07943	8.45282	0.219003	14.0611	6.58e-45	1.39e-43	XP_022890541.1	rho_GTPase-activating_protein_2-like	Olive	PF00786:P21-Rho-binding_domain//PF00620:RhoGAP_domain	IPR013766:Thioredoxin domain//IPR036249:Thioredoxin-like superfamily//IPR037944:Peroxiredoxin-5-like
LOC111365504	151.122	3.0774	8.44094	0.286322	10.7481	6.05e-27	7.1e-26	XP_022841827.1	polygalacturonase_At1g48100-like	Olive	PF00295:Glycosyl_hydrolases_family_28
LOC111388780	287.883	3.06814	8.38692	0.217794	14.0874	4.54e-45	9.68e-44	XP_022869350.1	non-specific_lipid_transfer_protein_GPI-anchored_2	Olive	PF14368:Probable_lipid_transfer	IPR002885:Pentatricopeptide repeat//IPR011990:Tetratricopeptide-like helical domain superfamily
LOC111382107	85.5868	3.06435	8.36489	0.36732	8.34244	7.28e-17	5.41e-16	XP_022861747.1	non-specific_lipid-transfer_protein_1-like	Olive	PF00234:Protease_inhibitor/seed_storage/LTP_family	IPR000823:Plant peroxidase//IPR002016:Haem peroxidase//IPR033905:Secretory peroxidase//IPR019794:Peroxidase, active site//IPR010255:Haem peroxidase superfamily//IPR019793:Peroxidases heam-ligand binding site
LOC111366183	104.783	3.06028	8.34136	0.352057	8.69257	3.54e-18	2.81e-17	XP_022842648.1	auxin-induced_protein_22C-like	Olive	PF02309:AUX/IAA_family	IPR011598:Myc-type, basic helix-loop-helix (bHLH) domain//IPR036638:Helix-loop-helix DNA-binding domain superfamily
LOC111401002	370.944	3.0509	8.28731	0.191639	15.9201	4.6e-57	1.31e-55	XP_022884283.1	probable_inactive_receptor_kinase_At5g67200	Olive	PF13855:Leucine_rich_repeat//PF07714:Protein_tyrosine_kinase
LOC111386847	289.39	3.04885	8.27553	0.223052	13.6688	1.56e-42	3.08e-41	XP_022867097.1	uncharacterized_LOC111386847	Olive		IPR036638:Helix-loop-helix DNA-binding domain superfamily//IPR011598:Myc-type, basic helix-loop-helix (bHLH) domain
LOC111382922	150.694	3.04757	8.26815	0.292352	10.4243	1.92e-25	2.13e-24		uncharacterized_GPI-anchored_protein_At4g28100-like	Olive
LOC111400977	201.151	3.04169	8.23454	0.246606	12.3342	5.93e-35	9.24e-34	XP_022884246.1	uncharacterized_LOC111400977,_transcript_variant_X2	Olive	PF04784:Protein_of_unknown_function,_DUF547//PF14389:Leucine-zipper_of_ternary_complex_factor_MIP1	IPR039261:Ferredoxin-NADP reductase (FNR), nucleotide-binding domain//IPR017938:Riboflavin synthase-like beta-barrel//IPR017927:FAD-binding domain, ferredoxin reductase-type//IPR001834:NADH:cytochrome b5 reductase-like
LOC111409805	564.86	3.0328	8.18397	0.169037	17.9416	5.58e-72	2.13e-70	XP_022895626.1	2-C-methyl-D-erythritol_4-phosphate_cytidylyltransferase,_chloroplastic-like,_transcript_variant_X2	Olive	PF01128:2-C-methyl-D-erythritol_4-phosphate_cytidylyltransferase
LOC111367060	173.042	3.02743	8.15359	0.287697	10.523	6.77e-26	7.61e-25	XP_022843524.1	kinesin-like_protein_KIN-12F,_transcript_variant_X2	Olive	PF00225:Kinesin_motor_domain	IPR035952:Rhomboid-like superfamily
LOC111402355	185.573	3.01532	8.08539	0.26117	11.5454	7.79e-31	1.06e-29	XP_022886355.1	PLASMODESMATA_CALLOSE-BINDING_PROTEIN_4-like	Olive		IPR023393:START-like domain superfamily//IPR002913:START domain
LOC111401164	609.15	3.01218	8.06784	0.164763	18.2819	1.15e-74	4.66e-73	XP_022884545.1	dirigent_protein_22-like	Olive	PF03018:Dirigent-like_protein	IPR001005:SANT/Myb domain//IPR017930:Myb domain//IPR009057:Homeobox-like domain superfamily
LOC111401820	88.7213	3.00664	8.0369	0.375345	8.01033	1.14e-15	7.94e-15	XP_022885508.1	factor_of_DNA_methylation_1-like,_transcript_variant_X3	Olive	PF03470:XS_zinc_finger_domain//PF03469:XH_domain//PF03468:XS_domain
LOC111410134	379.806	3.00616	8.03423	0.187723	16.0138	1.02e-57	3e-56	XP_022896119.1	O-acyltransferase_WSD1-like	Olive	PF03007:Wax_ester_synthase-like_Acyl-CoA_acyltransferase_domain//PF06974:Protein_of_unknown_function_(DUF1298)
LOC111400074	291.597	3.00188	8.0104	0.230658	13.0144	1.01e-38	1.77e-37	XP_022883295.1	uncharacterized_LOC111400074	Olive
LOC111405845	506.154	2.99086	7.94948	0.193151	15.4846	4.41e-54	1.18e-52	XP_022890682.1	DNA_(cytosine-5)-methyltransferase_CMT3,_transcript_variant_X2	Olive	PF00145:C-5_cytosine-specific_DNA_methylase//PF00385:Chromo_(CHRromatin_Organisation_MOdifier)_domain
LOC111398311	182.493	2.98926	7.94066	0.316779	9.43642	3.86e-21	3.53e-20	XP_022881000.1	protein_trichome_birefringence-like_3	Olive	PF13839:GDSL/SGNH-like_Acyl-Esterase_family_found_in_Pmr5_and_Cas1p//PF14416:PMR5_N_terminal_Domain
LOC111397416	346.166	2.98886	7.93845	0.22277	13.4168	4.82e-41	9.07e-40	XP_022880096.1	probable_beta-D-xylosidase_7	Olive	PF01915:Glycosyl_hydrolase_family_3_C-terminal_domain//PF14310:Fibronectin_type_III-like_domain//PF00933:Glycosyl_hydrolase_family_3_N_terminal_domain	IPR029044:Nucleotide-diphospho-sugar transferases
LOC111380112	113.315	2.98789	7.93313	0.337911	8.84225	9.38e-19	7.67e-18	XP_022859354.1	protein_IQ-DOMAIN_14-like,_transcript_variant_X2	Olive	PF00612:IQ_calmodulin-binding_motif//PF13178:Protein_of_unknown_function_(DUF4005)
LOC111374501	211.965	2.97801	7.87898	0.273869	10.8738	1.54e-27	1.85e-26	XP_022852941.1	putative_late_blight_resistance_protein_homolog_R1B-16,_transcript_variant_X2	Olive	PF00931:NB-ARC_domain
LOC111377041	4697.62	2.97156	7.84382	0.15071	19.717	1.54e-86	7.61e-85	XP_022855841.1	D-3-phosphoglycerate_dehydrogenase_2,_chloroplastic-like	Olive	PF01842:ACT_domain//PF02826:D-isomer_specific_2-hydroxyacid_dehydrogenase,_NAD_binding_domain	IPR011044:Quinoprotein amine dehydrogenase, beta chain-like
LOC111395985	87.8686	2.96933	7.83173	0.376409	7.88858	3.06e-15	2.07e-14	XP_022877996.1	trans-alpha-bergamotene_synthase-like,_transcript_variant_X2	Olive	PF03936:Terpene_synthase_family,_metal_binding_domain//PF01397:Terpene_synthase,_N-terminal_domain	IPR008271:Serine/threonine-protein kinase, active site//IPR011009:Protein kinase-like domain superfamily//IPR000719:Protein kinase domain
LOC111377815	264.002	2.96633	7.81546	0.218236	13.5923	4.45e-42	8.65e-41	XP_022856710.1	kinesin-like_protein_NACK1,_transcript_variant_X2	Olive	PF00225:Kinesin_motor_domain//PF11995:Domain_of_unknown_function_(DUF3490)
LOC111395574	377.805	2.96432	7.80455	0.196044	15.1207	1.18e-51	2.95e-50	XP_022877381.1	TPR_repeat-containing_thioredoxin_TTL1-like	Olive	PF00085:Thioredoxin//PF00515:Tetratricopeptide_repeat//PF07719:Tetratricopeptide_repeat
LOC111405616	621.459	2.96043	7.78357	0.155408	19.0495	6.64e-81	3.02e-79	XP_022890344.1	UDP-glycosyltransferase_88B1-like	Olive	PF00201:UDP-glucoronosyl_and_UDP-glucosyl_transferase	IPR004827:Basic-leucine zipper domain
LOC111398639	142.199	2.95413	7.74967	0.288065	10.2551	1.12e-24	1.2e-23	XP_022881401.1	probable_disease_resistance_protein_At4g27220	Olive	PF00931:NB-ARC_domain//PF13855:Leucine_rich_repeat	IPR000719:Protein kinase domain//IPR011009:Protein kinase-like domain superfamily
LOC111371323	219.301	2.94367	7.69367	0.236708	12.4359	1.67e-35	2.65e-34	XP_022849009.1	uncharacterized_LOC111371323,_transcript_variant_X5	Olive	PF14309:Domain_of_unknown_function_(DUF4378)//PF14383:DUF761-associated_sequence_motif
LOC111374883	638.915	2.94156	7.6824	0.156692	18.7729	1.26e-78	5.47e-77	XP_022853410.1	thaumatin-like_protein_1	Olive	PF00314:Thaumatin_family	IPR006502:Protein of unknown function PDDEXK-like
LOC111369368	203.015	2.94118	7.68039	0.285734	10.2934	7.54e-25	8.14e-24	XP_022846622.1	rop_guanine_nucleotide_exchange_factor_7-like,_transcript_variant_X2	Olive	PF03759:PRONE_(Plant-specific_Rop_nucleotide_exchanger)	IPR036787:Translation initiation factor 3 (IF-3), N-terminal domain superfamily
LOC111409342	116.921	2.94118	7.68038	0.323298	9.09742	9.25e-20	7.96e-19	XP_022895161.1	cyclin-B2-3-like,_transcript_variant_X2	Olive	PF02984:Cyclin,_C-terminal_domain//PF00134:Cyclin,_N-terminal_domain	IPR012677:Nucleotide-binding alpha-beta plait domain superfamily//IPR000504:RNA recognition motif domain//IPR035979:RNA-binding domain superfamily
LOC111372091	926.371	2.93549	7.65017	0.205808	14.2633	3.71e-46	8.1e-45	XP_022850031.1	protein_DETOXIFICATION_40-like	Olive	PF01554:MatE
LOC111386435	92.6891	2.92274	7.58287	0.357647	8.17216	3.03e-16	2.17e-15	XP_022866668.1	FHA_domain-containing_protein_PS1-like	Olive	PF13638:PIN_domain//PF00498:FHA_domain	IPR002048:EF-hand domain//IPR011992:EF-hand domain pair//IPR036188:FAD/NAD(P)-binding domain superfamily
LOC111372040	104.51	2.91964	7.56655	0.344059	8.48585	2.14e-17	1.64e-16	XP_022849957.1	GDSL_esterase/lipase_At4g10955-like	Olive		IPR004827:Basic-leucine zipper domain
LOC111407973	634.575	2.91193	7.52622	0.181145	16.0751	3.82e-58	1.13e-56	XP_022893474.1	laccase-4-like	Olive	PF07732:Multicopper_oxidase//PF00394:Multicopper_oxidase//PF07731:Multicopper_oxidase	IPR032675:Leucine-rich repeat domain superfamily//IPR003591:Leucine-rich repeat, typical subtype
LOC111370464	388.744	2.91053	7.51896	0.18736	15.5344	2.03e-54	5.48e-53	XP_022847946.1	patellin-4-like	Olive	PF03765:CRAL/TRIO,_N-terminal_domain//PF00650:CRAL/TRIO_domain
LOC111389970	324.689	2.90041	7.46639	0.207994	13.9447	3.39e-44	7.01e-43	XP_022870728.1	protein_LIGHT-DEPENDENT_SHORT_HYPOCOTYLS_10-like,_transcript_variant_X2	Olive	PF04852:Protein_of_unknown_function_(DUF640)	IPR003602:DNA topoisomerase, type IA, DNA-binding domain//IPR013826:DNA topoisomerase, type IA, central region, subdomain 3//IPR005733:DNA topoisomerase I, bacterial-type//IPR023406:DNA topoisomerase, type IA, active site//IPR013497:DNA topoisomerase, type IA, central//IPR006171:TOPRIM domain//IPR013824:DNA topoisomerase, type IA, central region, subdomain 1//IPR034149:DNA topoisomerase 1, TOPRIM…
LOC111410030	170.501	2.89307	7.42851	0.374916	7.71658	1.19e-14	7.83e-14	XP_022895954.1	heparan-alpha-glucosaminide_N-acetyltransferase	Olive		IPR043141:Ribosomal protein L10-like domain superfamily//IPR022973:Ribosomal protein L10//IPR001790:Ribosomal protein L10P
LOC111374207	249.246	2.87877	7.35522	0.257548	11.1776	5.25e-29	6.71e-28	XP_022852619.1	endoglucanase_11-like	Olive	PF00759:Glycosyl_hydrolase_family_9	IPR029000:Cyclophilin-like domain superfamily
LOC111377542	407.384	2.87597	7.34096	0.187219	15.3615	2.97e-53	7.74e-52	XP_022856437.1	protein_FIZZY-RELATED_3	Olive	PF00400:WD_domain,_G-beta_repeat
LOC111381988	286.098	2.8752	7.33705	0.2151	13.3668	9.45e-41	1.76e-39	XP_022861615.1	uncharacterized_LOC111381988	Olive
LOC111401564	89.7222	2.87168	7.31919	0.365069	7.86615	3.66e-15	2.46e-14	XP_022885125.1	protein_IQ-DOMAIN_14-like,_transcript_variant_X2	Olive	PF13178:Protein_of_unknown_function_(DUF4005)//PF00612:IQ_calmodulin-binding_motif
LOC111368495	73.9305	2.85772	7.2487	0.398524	7.17076	7.46e-13	4.35e-12	XP_022845529.1	uncharacterized_LOC111368495	Olive	PF06749:Protein_of_unknown_function_(DUF1218)
LOC111408000	88.6985	2.84774	7.19874	0.368935	7.71881	1.17e-14	7.7e-14	XP_022893507.1	protein_MAINTENANCE_OF_MERISTEMS-like,_transcript_variant_X2	Olive	PF10536:Plant_mobile_domain	IPR009072:Histone-fold//IPR003956:Transcription factor, NFYB/HAP3, conserved site
LOC111395538	172.951	2.84015	7.16093	0.260411	10.9064	1.07e-27	1.3e-26	XP_022877327.1	uncharacterized_LOC111395538	Olive		IPR011992:EF-hand domain pair//IPR002048:EF-hand domain
LOC111403768	566.469	2.83766	7.14861	0.198906	14.2664	3.55e-46	7.77e-45	XP_022888156.1	reticulon-like_protein_B21,_transcript_variant_X3	Olive	PF02453:Reticulon	IPR027417:P-loop containing nucleoside triphosphate hydrolase
LOC111400919	156.783	2.82808	7.10131	0.345382	8.18828	2.65e-16	1.91e-15	XP_022884157.1	protein_CHLORORESPIRATORY_REDUCTION_7,_chloroplastic,_transcript_variant_X2	Olive	PF12095:Protein_CHLORORESPIRATORY_REDUCTION_7	IPR000164:Histone H3/CENP-A//IPR009072:Histone-fold
LOC111400943	107.253	2.82042	7.06366	0.340598	8.28079	1.22e-16	8.99e-16	XP_022884188.1	leucine-rich_repeat_extensin-like_protein_3	Olive	PF01190:Pollen_proteins_Ole_e_I_like
LOC111372909	465.472	2.81747	7.04924	0.169603	16.6121	5.7e-62	1.82e-60	XP_022851102.1	early_nodulin-like_protein_1	Olive	PF02298:Plastocyanin-like_domain	IPR037256:ASC domain superfamily//IPR006828:Association with the SNF1 complex (ASC) domain
LOC111366163	105.382	2.8171	7.04743	0.387966	7.26119	3.84e-13	2.29e-12	XP_022842626.1	probable_pectate_lyase_13	Olive	PF00544:Pectate_lyase
LOC111402792	138.409	2.80742	7.00034	0.390695	7.18571	6.69e-13	3.92e-12	XP_022886892.1	uncharacterized_LOC111402792	Olive
LOC111393679	595.43	2.80617	6.99423	0.188705	14.8706	5.11e-50	1.24e-48	XP_022875104.1	syntaxin-related_protein_KNOLLE-like	Olive	PF05739:SNARE_domain//PF00804:Syntaxin
LOC111401913	150.775	2.80106	6.96954	0.288099	9.72255	2.42e-22	2.35e-21	XP_022885659.1	putative_receptor-like_protein_kinase_At1g80870	Olive	PF00069:Protein_kinase_domain
LOC111403579	2917.96	2.78954	6.9141	0.11438	24.3884	2.27e-131	2.16e-129	XP_022887944.1	subtilisin-like_protease_SBT1.5	Olive	PF00082:Subtilase_family//PF17766:Fibronectin_type-III_domain//PF05922:Peptidase_inhibitor_I9	IPR002173:Carbohydrate/purine kinase, PfkB, conserved site//IPR002139:Ribokinase/fructokinase//IPR029056:Ribokinase-like
LOC111377027	266.056	2.78692	6.90155	0.211549	13.1739	1.24e-39	2.24e-38	XP_022855821.1	uncharacterized_LOC111377027	Olive		IPR036452:Ribonucleoside hydrolase-like
LOC111399734	89.3266	2.7866	6.9	0.438756	6.35113	2.14e-10	1.05e-09	XP_022882972.1	laccase-17-like,_transcript_variant_X2	Olive	PF00394:Multicopper_oxidase//PF07731:Multicopper_oxidase//PF07732:Multicopper_oxidase	IPR001404:Heat shock protein Hsp90 family//IPR003594:Histidine kinase/HSP90-like ATPase//IPR020575:Heat shock protein Hsp90, N-terminal//IPR036890:Histidine kinase/HSP90-like ATPase superfamily//IPR019805:Heat shock protein Hsp90, conserved site//IPR037196:HSP90, C-terminal domain//IPR020568:Ribosomal protein S5 domain 2-type fold
LOC111379415	188.832	2.78504	6.89257	0.260746	10.6811	1.25e-26	1.45e-25	XP_022858537.1	interactor_of_constitutive_active_ROPs_3,_transcript_variant_X2	Olive		IPR000535:Major sperm protein (MSP) domain//IPR008962:PapD-like superfamily//IPR013783:Immunoglobulin-like fold//IPR016763:Vesicle-associated membrane-protein-associated protein
LOC111372246	2980.39	2.78053	6.87102	0.120361	23.1016	4.46e-118	3.45e-116	XP_022850258.1	protein_NRT1/_PTR_FAMILY_5.10-like	Olive	PF00854:POT_family
LOC111370624	185.571	2.76253	6.78584	0.248707	11.1075	1.15e-28	1.46e-27	XP_022848205.1	protein_SINE1-like	Olive		IPR027417:P-loop containing nucleoside triphosphate hydrolase
LOC111367089	187.018	2.75621	6.75618	0.25087	10.9866	4.43e-28	5.49e-27	XP_022843567.1	PLASMODESMATA_CALLOSE-BINDING_PROTEIN_2-like	Olive	PF07983:X8_domain	IPR019775:WD40 repeat, conserved site//IPR001680:WD40 repeat//IPR015943:WD40/YVTN repeat-like-containing domain superfamily//IPR036322:WD40-repeat-containing domain superfamily//IPR017986:WD40-repeat-containing domain//IPR011043:Galactose oxidase/kelch, beta-propeller
LOC111385542	54.0404	2.74755	6.71574	0.456369	6.02044	1.74e-09	7.97e-09	XP_022865714.1	uncharacterized_LOC111385542,_transcript_variant_X2	Olive
LOC111405571	316.489	2.73743	6.66883	0.20542	13.326	1.63e-40	3.02e-39	XP_022890287.1	65-kDa_microtubule-associated_protein_3-like,_transcript_variant_X2	Olive	PF03999:Microtubule_associated_protein_(MAP65/ASE1_family)
LOC111382402	232.543	2.72659	6.61891	0.221463	12.3117	7.83e-35	1.22e-33	XP_022862137.1	protein_SODIUM_POTASSIUM_ROOT_DEFECTIVE_2-like	Olive	PF00403:Heavy-metal-associated_domain	IPR004827:Basic-leucine zipper domain//IPR025422:Transcription factor TGA like domain
LOC111389737	92.7182	2.71291	6.55642	0.37066	7.31912	2.5e-13	1.5e-12	XP_022870456.1	putative_cyclin-D6-1	Olive	PF02984:Cyclin,_C-terminal_domain//PF00134:Cyclin,_N-terminal_domain	IPR016969:Uncharacterised conserved protein UCP031088, alpha/beta hydrolase, At1g15070//IPR002471:Peptidase S9, serine active site//IPR029058:Alpha/Beta hydrolase fold
LOC111400920	129.673	2.7112	6.54868	0.372372	7.28091	3.32e-13	1.98e-12	XP_022884158.1	uncharacterized_LOC111400920	Olive
LOC111401001	209.929	2.70899	6.53862	0.263789	10.2695	9.67e-25	1.04e-23	XP_022884281.1	protein_IRX15-LIKE-like	Olive	PF04669:Polysaccharide_biosynthesis	IPR034146:snRNP35, RNA recognition motif//IPR000504:RNA recognition motif domain//IPR035979:RNA-binding domain superfamily//IPR012677:Nucleotide-binding alpha-beta plait domain superfamily
LOC111408102	181.472	2.70647	6.52722	0.248869	10.8751	1.52e-27	1.83e-26	XP_022893655.1	uncharacterized_LOC111408102	Olive	PF06749:Protein_of_unknown_function_(DUF1218)
LOC111370056	472.061	2.7053	6.52196	0.192358	14.0639	6.33e-45	1.34e-43	XP_022847536.1	probably_inactive_leucine-rich_repeat_receptor-like_protein_kinase_At5g06940	Olive	PF08263:Leucine_rich_repeat_N-terminal_domain//PF00069:Protein_kinase_domain//PF13855:Leucine_rich_repeat	IPR033467:Tesmin/TSO1-like CXC domain//IPR005172:CRC domain
LOC111395196	252.306	2.70497	6.52046	0.24834	10.8922	1.26e-27	1.52e-26	XP_022876961.1	EH_domain-containing_protein_1-like	Olive	PF18150:Domain_of_unknown_function_(DUF5600)	IPR037992:TRAPP complex, Trs33 subunit//IPR024096:NO signalling/Golgi transport ligand-binding domain superfamily
LOC111389006	90.0761	2.70386	6.51545	0.353361	7.65184	1.98e-14	1.28e-13	XP_022869616.1	protein_ESKIMO_1-like,_transcript_variant_X2	Olive	PF14416:PMR5_N_terminal_Domain//PF13839:GDSL/SGNH-like_Acyl-Esterase_family_found_in_Pmr5_and_Cas1p	IPR001005:SANT/Myb domain//IPR017884:SANT domain//IPR007526:SWIRM domain//IPR009057:Homeobox-like domain superfamily//IPR016827:Transcriptional adaptor 2
LOC111408103	146.036	2.69733	6.486	0.274351	9.83169	8.22e-23	8.16e-22	XP_022893656.1	zinc_finger_protein_CONSTANS-LIKE_16	Olive	PF06203:CCT_motif//PF00643:B-box_zinc_finger	IPR000146:Fructose-1,6-bisphosphatase class 1//IPR020548:Fructose-1,6-bisphosphatase, active site//IPR028343:Fructose-1,6-bisphosphatase
LOC111393631	110.246	2.69607	6.48033	0.345628	7.8005	6.17e-15	4.11e-14	XP_022875029.1	QWRF_motif-containing_protein_2-like	Olive	PF04484:QWRF_family
LOC111386313	484.475	2.69565	6.47846	0.180115	14.9663	1.22e-50	2.97e-49		expansin-A1	Olive
LOC111390831	203.877	2.68544	6.43277	0.24708	10.8687	1.62e-27	1.96e-26	XP_022871717.1	probably_inactive_receptor-like_protein_kinase_At2g46850	Olive	PF07714:Protein_tyrosine_kinase//PF13947:Wall-associated_receptor_kinase_galacturonan-binding	IPR029044:Nucleotide-diphospho-sugar transferases
LOC111402981	5884.93	2.68314	6.42252	0.134628	19.93	2.24e-88	1.15e-86	XP_022887084.1	protein_DETOXIFICATION_35-like	Olive	PF01554:MatE	IPR011032:GroES-like superfamily//IPR036291:NAD(P)-binding domain superfamily
LOC111367291	606.479	2.68211	6.41793	0.598242	4.48332	7.35e-06	2.32e-05	XP_022843858.1	inositol_oxygenase_1-like	Olive	PF05153:Myo-inositol_oxygenase
LOC111381366	507.282	2.6801	6.40901	0.190142	14.0953	4.06e-45	8.68e-44	XP_022860911.1	uncharacterized_LOC111381366	Olive	PF01436:NHL_repeat
LOC111389809	80.0998	2.66884	6.35918	0.359094	7.43216	1.07e-13	6.58e-13	XP_022870557.1	transcription_factor_MYB52-like	Olive	PF00249:Myb-like_DNA-binding_domain
LOC111410113	337.268	2.66845	6.35745	0.19397	13.757	4.62e-43	9.29e-42	XP_022896086.1	thaumatin-like_protein_1	Olive	PF00314:Thaumatin_family
LOC111394168	668.327	2.66367	6.33642	0.147672	18.0377	9.85e-73	3.8e-71	XP_022875706.1	cellulose_synthase-like_protein_D5	Olive	PF03552:Cellulose_synthase//PF14570:RING/Ubox_like_zinc-binding_domain	IPR005202:Transcription factor GRAS
LOC111407988	260.491	2.66058	6.32285	0.272162	9.77571	1.43e-22	1.41e-21	XP_022893494.1	uncharacterized_LOC111407988	Olive
LOC111379546	203.127	2.65942	6.31781	0.236572	11.2415	2.55e-29	3.3e-28		probable_pectate_lyase_1	Olive
LOC111387104	418.142	2.65569	6.30149	0.190862	13.9142	5.19e-44	1.07e-42	XP_022867392.1	BRASSINOSTEROID_INSENSITIVE_1-associated_receptor_kinase_1-like	Olive	PF08263:Leucine_rich_repeat_N-terminal_domain//PF13855:Leucine_rich_repeat//PF07714:Protein_tyrosine_kinase	IPR013083:Zinc finger, RING/FYVE/PHD-type//IPR001841:Zinc finger, RING-type
LOC111411713	2920.41	2.65399	6.29405	0.177228	14.975	1.07e-50	2.62e-49	XP_022898049.1	probable_polygalacturonase	Olive	PF00295:Glycosyl_hydrolases_family_28	IPR017887:Transcription factor TCP subgroup
LOC111405379	125.92	2.6528	6.28888	0.292186	9.07915	1.09e-19	9.38e-19	XP_022889986.1	uncharacterized_protein_At5g39865-like	Olive	PF00462:Glutaredoxin	IPR000834:Peptidase M14, carboxypeptidase A
LOC111374465	68.9809	2.64554	6.2573	0.442645	5.97666	2.28e-09	1.04e-08	XP_022852901.1	laccase-17-like	Olive	PF07732:Multicopper_oxidase//PF07731:Multicopper_oxidase//PF00394:Multicopper_oxidase
LOC111397318	244.653	2.6365	6.21819	0.243456	10.8295	2.5e-27	2.98e-26	XP_022879937.1	kinesin-like_protein_KIN-14N	Olive	PF00225:Kinesin_motor_domain	IPR001810:F-box domain//IPR036047:F-box-like domain superfamily//IPR011043:Galactose oxidase/kelch, beta-propeller
LOC111376467	872.157	2.63582	6.21529	0.135215	19.4935	1.25e-84	6e-83	XP_022855195.1	uncharacterized_LOC111376467	Olive		IPR029047:Heat shock protein 70kD, peptide-binding domain superfamily//IPR043129:ATPase, nucleotide binding domain//IPR029048:Heat shock protein 70kD, C-terminal domain superfamily
LOC111392672	365.182	2.63325	6.20424	0.201075	13.0959	3.48e-39	6.18e-38	XP_022873820.1	protein_NETWORKED_4B-like,_transcript_variant_X2	Olive	PF07765:KIP1-like_protein	IPR000961:AGC-kinase, C-terminal//IPR008271:Serine/threonine-protein kinase, active site//IPR000719:Protein kinase domain//IPR011009:Protein kinase-like domain superfamily
LOC111405057	51.0165	2.63155	6.19689	0.542075	4.85458	1.21e-06	4.2e-06	XP_022889513.1	laccase-12-like	Olive	PF00394:Multicopper_oxidase//PF07731:Multicopper_oxidase//PF07732:Multicopper_oxidase
LOC111373715	167.762	2.62966	6.1888	0.259586	10.1302	4.06e-24	4.25e-23	XP_022852058.1	putative_late_blight_resistance_protein_homolog_R1B-17	Olive	PF00931:NB-ARC_domain	IPR015421:Pyridoxal phosphate-dependent transferase, major domain//IPR004838:Aminotransferases, class-I, pyridoxal-phosphate-binding site//IPR015422:Pyridoxal phosphate-dependent transferase domain 1//IPR015424:Pyridoxal phosphate-dependent transferase
LOC111401969	502.445	2.62727	6.17854	0.176667	14.8713	5.06e-50	1.23e-48	XP_022885737.1	putative_DNA_helicase_INO80	Olive
LOC111368887	77.3026	2.6187	6.14198	0.428027	6.11807	9.47e-10	4.44e-09	XP_022846148.1	protein_IQ-DOMAIN_1,_transcript_variant_X3	Olive		IPR009038:GOLD domain
LOC111394865	189.946	2.61833	6.14038	0.248417	10.54	5.65e-26	6.37e-25	XP_022876691.1	protein_WVD2-like_7,_transcript_variant_X3	Olive		IPR029021:Protein-tyrosine phosphatase-like//IPR014020:Tensin phosphatase, C2 domain//IPR029023:Tensin-type phosphatase domain//IPR016130:Protein-tyrosine phosphatase, active site
LOC111398785	236.098	2.59768	6.05311	0.221903	11.7064	1.18e-31	1.67e-30	XP_022881646.1	transcription_factor_bHLH71-like,_transcript_variant_X2	Olive	PF00010:Helix-loop-helix_DNA-binding_domain
LOC111402811	207.512	2.59714	6.05085	0.242002	10.7319	7.21e-27	8.44e-26	XP_022886909.1	uncharacterized_LOC111402811	Olive
LOC111401762	264.009	2.59601	6.04613	0.208039	12.4785	9.79e-36	1.57e-34	XP_022885418.1	uncharacterized_LOC111401762,_transcript_variant_X6	Olive	PF07891:Protein_of_unknown_function_(DUF1666)
LOC111406524	207.892	2.59286	6.03292	0.279586	9.27393	1.79e-20	1.59e-19	XP_022891704.1	ankyrin_repeat_domain-containing_protein_50-like	Olive	PF13637:Ankyrin_repeats_(many_copies)//PF12796:Ankyrin_repeats_(3_copies)
LOC111377547	132.581	2.58763	6.0111	0.284481	9.09597	9.37e-20	8.06e-19	XP_022856446.1	expansin-A4-like	Olive	PF01357:Pollen_allergen//PF03330:Lytic_transglycolase	IPR036343:Glutamyl-tRNA reductase, N-terminal domain superfamily//IPR036291:NAD(P)-binding domain superfamily//IPR000343:Tetrapyrrole biosynthesis, glutamyl-tRNA reductase//IPR018214:Glutamyl-tRNA reductase, conserved site
LOC111407142	830.988	2.58578	6.00339	0.170473	15.1683	5.74e-52	1.45e-50	XP_022892233.1	phosphatidylinositol/phosphatidylcholine_transfer_protein_SFH13-like,_transcript_variant_X3	Olive	PF03765:CRAL/TRIO,_N-terminal_domain//PF00650:CRAL/TRIO_domain	IPR036691:Endonuclease/exonuclease/phosphatase superfamily//IPR000300:Inositol polyphosphate-related phosphatase
LOC111393442	424.616	2.58455	5.99827	0.184337	14.0208	1.16e-44	2.44e-43	XP_022874743.1	cellulose_synthase_A_catalytic_subunit_4_[UDP-forming]-like	Olive	PF03552:Cellulose_synthase//PF14569:Zinc-binding_RING-finger	IPR015943:WD40/YVTN repeat-like-containing domain superfamily//IPR001680:WD40 repeat//IPR017986:WD40-repeat-containing domain//IPR036322:WD40-repeat-containing domain superfamily
LOC111403367	12568.3	2.58215	5.98833	0.104576	24.6916	1.32e-134	1.29e-132	XP_022887658.1	pectinesterase-like	Olive	PF04043:Plant_invertase/pectin_methylesterase_inhibitor//PF01095:Pectinesterase	IPR036093:NAC domain superfamily//IPR003441:NAC domain
LOC111401377	88.9049	2.57961	5.97776	0.362434	7.11745	1.1e-12	6.36e-12	XP_022884851.1	kinesin-like_protein_KIN-7N	Olive	PF00225:Kinesin_motor_domain
LOC111381220	454.22	2.57108	5.94254	0.178379	14.4136	4.25e-47	9.59e-46	XP_022860744.1	cytochrome_P450_CYP72A219-like	Olive	PF00067:Cytochrome_P450	IPR036220:UDP-glucose/GDP-mannose dehydrogenase, C-terminal domain superfamily//IPR014027:UDP-glucose/GDP-mannose dehydrogenase, C-terminal//IPR008927:6-phosphogluconate dehydrogenase-like, C-terminal domain superfamily
LOC111394360	264.737	2.56986	5.93751	0.215644	11.9171	9.64e-33	1.41e-31	XP_022875899.1	cyclin-A1-4-like	Olive	PF02984:Cyclin,_C-terminal_domain//PF00134:Cyclin,_N-terminal_domain	IPR002885:Pentatricopeptide repeat//IPR011990:Tetratricopeptide-like helical domain superfamily
LOC111389628	321.117	2.56938	5.93552	0.20961	12.2579	1.52e-34	2.35e-33	XP_022870328.1	titin_homolog	Olive		IPR025794:Histone H3-K9 methyltransferase, plant//IPR007728:Pre-SET domain//IPR001214:SET domain//IPR003616:Post-SET domain//IPR015947:PUA-like superfamily//IPR003105:SRA-YDG//IPR036987:SRA-YDG superfamily
LOC111412162	104.259	2.56005	5.89727	0.337306	7.58969	3.21e-14	2.05e-13	XP_022898723.1	O-fucosyltransferase_8,_transcript_variant_X3	Olive	PF10250:GDP-fucose_protein_O-fucosyltransferase	IPR003609:PAN/Apple domain//IPR000719:Protein kinase domain//IPR011009:Protein kinase-like domain superfamily//IPR000742:EGF-like domain//IPR001480:Bulb-type lectin domain//IPR008271:Serine/threonine-protein kinase, active site//IPR036426:Bulb-type lectin domain superfamily//IPR024171:S-receptor-like serine/threonine-protein kinase//IPR017441:Protein kinase, ATP binding site
LOC111366259	398.725	2.55803	5.88902	0.176043	14.5307	7.74e-48	1.78e-46	XP_022842753.1	signal_recognition_particle_54_kDa_protein,_chloroplastic	Olive	PF02978:Signal_peptide_binding_domain//PF02881:SRP54-type_protein,_helical_bundle_domain//PF00448:SRP54-type_protein,_GTPase_domain
LOC111396831	1033.68	2.55735	5.88627	0.129585	19.735	1.08e-86	5.35e-85	XP_022879128.1	CTP_synthase-like	Olive	PF06418:CTP_synthase_N-terminus//PF00117:Glutamine_amidotransferase_class-I	IPR002550:CNNM, transmembrane domain
LOC111406324	207.285	2.55582	5.88003	0.248073	10.3027	6.85e-25	7.4e-24	XP_022891480.1	GDSL_esterase/lipase_CPRD49-like	Olive	PF13472:GDSL-like_Lipase/Acylhydrolase_family	IPR033740:Aminopeptidase P//IPR036005:Creatinase/aminopeptidase-like//IPR029149:Creatinase/Aminopeptidase P/Spt16, N-terminal
LOC111402666	231.249	2.55507	5.87694	0.252396	10.1232	4.36e-24	4.55e-23	XP_022886804.1	receptor-like_serine/threonine-protein_kinase_ALE2	Olive	PF07714:Protein_tyrosine_kinase	IPR003388:Reticulon
LOC111377507	1416.51	2.55111	5.86084	0.137664	18.5314	1.15e-76	4.82e-75	XP_022856387.1	transcription_factor_AS1	Olive	PF13921:Myb-like_DNA-binding_domain	IPR001780:Ribosomal protein L35A//IPR009000:Translation protein, beta-barrel domain superfamily//IPR018266:Ribosomal protein L35Ae, conserved site//IPR038661:Ribosomal protein L35A superfamily
LOC111392506	2528.07	2.5493	5.8535	0.148193	17.2025	2.54e-66	8.69e-65	XP_022873635.1	cinnamoyl-CoA_reductase_1-like	Olive		IPR002108:Actin-depolymerising factor homology domain//IPR017904:ADF/Cofilin//IPR029006:ADF-H/Gelsolin-like domain superfamily
LOC111405137	2020.46	2.54668	5.84287	0.263916	9.64959	4.94e-22	4.72e-21	XP_022889660.1	sulfite_exporter_TauE/SafE_family_protein_3-like,_transcript_variant_X3	Olive	PF01925:Sulfite_exporter_TauE/SafE
LOC111405311	1265.18	2.54589	5.83969	0.137078	18.5726	5.36e-77	2.25e-75	XP_022889906.1	probable_pectate_lyase_18	Olive	PF00544:Pectate_lyase	IPR036291:NAD(P)-binding domain superfamily
LOC111406157	919.321	2.54353	5.83015	0.141613	17.9611	3.93e-72	1.5e-70	XP_022891163.1	probable_protein_S-acyltransferase_22	Olive	PF01529:DHHC_palmitoyltransferase	IPR011009:Protein kinase-like domain superfamily//IPR008271:Serine/threonine-protein kinase, active site//IPR000719:Protein kinase domain//IPR017441:Protein kinase, ATP binding site
LOC111390717	72.3772	2.54232	5.82527	0.37001	6.87096	6.38e-12	3.5e-11	XP_022871585.1	cytochrome_b561_and_DOMON_domain-containing_protein_At3g61750,_transcript_variant_X2	Olive	PF03351:DOMON_domain//PF03188:Eukaryotic_cytochrome_b561	IPR004827:Basic-leucine zipper domain
LOC111372810	124.7	2.54218	5.82469	0.305111	8.33199	7.95e-17	5.89e-16	XP_022850983.1	fasciclin-like_arabinogalactan_protein_11	Olive	PF02469:Fasciclin_domain
LOC111385191	50.8113	2.53903	5.81197	0.43629	5.81959	5.9e-09	2.59e-08	XP_022865330.1	peroxidase_43-like	Olive	PF00141:Peroxidase	IPR013083:Zinc finger, RING/FYVE/PHD-type//IPR011011:Zinc finger, FYVE/PHD-type//IPR001965:Zinc finger, PHD-type//IPR001005:SANT/Myb domain//IPR019786:Zinc finger, PHD-type, conserved site//IPR009057:Homeobox-like domain superfamily//IPR017877:Myb-like domain
LOC111366313	424.245	2.53426	5.79278	0.196049	12.9266	3.18e-38	5.48e-37	XP_022842817.1	transcription_factor_bHLH35-like	Olive	PF00010:Helix-loop-helix_DNA-binding_domain	IPR000719:Protein kinase domain//IPR011009:Protein kinase-like domain superfamily//IPR008271:Serine/threonine-protein kinase, active site
LOC111395766	713.158	2.53256	5.78596	0.16657	15.2042	3.32e-52	8.43e-51	XP_022877670.1	kinesin-like_protein_KIN-12F	Olive	PF00225:Kinesin_motor_domain
LOC111370879	725.262	2.52952	5.77379	0.479947	5.27042	1.36e-07	5.22e-07	XP_022848549.1	polyphenol_oxidase_I,_chloroplastic-like	Olive	PF12143:Protein_of_unknown_function_(DUF_B2219)//PF00264:Common_central_domain_of_tyrosinase//PF12142:Polyphenol_oxidase_middle_domain
LOC111396984	86.9127	2.51785	5.72727	0.348481	7.22521	5e-13	2.96e-12	XP_022879404.1	COBRA-like_protein_4	Olive	PF04833:COBRA-like_protein	IPR002048:EF-hand domain//IPR018247:EF-Hand 1, calcium-binding site//IPR011992:EF-hand domain pair
LOC111384140	93.28	2.51672	5.72278	0.329178	7.64546	2.08e-14	1.35e-13	XP_022864161.1	uncharacterized_LOC111384140,_transcript_variant_X3	Olive	PF04570:zinc-finger_of_the_FCS-type,_C2-C2	IPR011989:Armadillo-like helical//IPR016024:Armadillo-type fold
LOC111367584	292.593	2.51076	5.69922	0.194866	12.8845	5.5e-38	9.39e-37	XP_022844303.1	thaumatin-like_protein_1b	Olive	PF00314:Thaumatin_family
LOC111405662	141.252	2.50328	5.66973	0.281191	8.90243	5.46e-19	4.51e-18	XP_022890424.1	protein_DOWNY_MILDEW_RESISTANCE_6-like,_transcript_variant_X2	Olive	PF14226:non-haem_dioxygenase_in_morphine_synthesis_N-terminal//PF03171:2OG-Fe(II)_oxygenase_superfamily	IPR009050:Globin-like superfamily//IPR012292:Globin/Protoglobin
LOC111400901	191.872	2.50069	5.65957	0.251095	9.95913	2.3e-23	2.34e-22	XP_022884126.1	probable_serine/threonine-protein_kinase_PIX7,_transcript_variant_X3	Olive	PF07714:Protein_tyrosine_kinase
LOC111391679	162.728	2.49443	5.63507	0.265655	9.38976	6.01e-21	5.44e-20		uncharacterized_protein_LOC111391679	Olive
LOC111369656	216.899	2.49402	5.63344	0.230434	10.8231	2.68e-27	3.19e-26	XP_022847023.1	probable_serine/threonine-protein_kinase_PBL19,_transcript_variant_X2	Olive	PF07714:Protein_tyrosine_kinase	IPR023393:START-like domain superfamily
LOC111367742	233.335	2.49106	5.62191	0.255805	9.73814	2.07e-22	2.02e-21	XP_022844543.1	heavy_metal-associated_isoprenylated_plant_protein_9-like	Olive	PF00403:Heavy-metal-associated_domain	IPR010977:Aromatic-L-amino-acid decarboxylase//IPR015424:Pyridoxal phosphate-dependent transferase
LOC111391403	152.087	2.49083	5.62103	0.274491	9.07439	1.14e-19	9.78e-19	XP_022872385.1	WEB_family_protein_At2g38370-like	Olive	PF05701:Weak_chloroplast_movement_under_blue_light
LOC111396137	116.263	2.49006	5.61802	0.35441	7.02593	2.13e-12	1.21e-11	XP_022878218.1	cyclin-D1-1-like	Olive	PF02984:Cyclin,_C-terminal_domain//PF00134:Cyclin,_N-terminal_domain	IPR000569:HECT domain//IPR015940:Ubiquitin-associated domain//IPR003903:Ubiquitin interacting motif//IPR009060:UBA-like superfamily//IPR016024:Armadillo-type fold//IPR035983:HECT, E3 ligase catalytic domain
LOC111389169	91.1681	2.48402	5.59455	0.345983	7.1796	6.99e-13	4.09e-12	XP_022869823.1	protein_WVD2-like_7,_transcript_variant_X3	Olive		IPR011598:Myc-type, basic helix-loop-helix (bHLH) domain//IPR036638:Helix-loop-helix DNA-binding domain superfamily
LOC111365273	73.4016	2.48204	5.58688	0.36598	6.78191	1.19e-11	6.4e-11	XP_022841484.1	WUSCHEL-related_homeobox_1-like,_transcript_variant_X2	Olive	PF00046:Homeodomain	IPR036883:PDCD5-like superfamily//IPR002836:PDCD5-like
LOC111371766	35204.8	2.47515	5.56026	0.129135	19.1672	6.95e-82	3.22e-80	XP_022849681.1	catalase_isozyme_3-like	Olive	PF06628:Catalase-related_immune-responsive//PF00199:Catalase
LOC111376205	394.153	2.47413	5.55631	0.183895	13.454	2.92e-41	5.53e-40	XP_022854921.1	nitrate_regulatory_gene2_protein-like	Olive	PF04783:Protein_of_unknown_function_(DUF630)//PF04782:Protein_of_unknown_function_(DUF632)	IPR001356:Homeobox domain//IPR009057:Homeobox-like domain superfamily//IPR017970:Homeobox, conserved site//IPR000047:Helix-turn-helix motif
LOC111395591	172.232	2.47059	5.5427	0.247017	10.0017	1.5e-23	1.53e-22	XP_022877410.1	uncharacterized_LOC111395591	Olive		IPR002401:Cytochrome P450, E-class, group I//IPR017972:Cytochrome P450, conserved site//IPR036396:Cytochrome P450 superfamily//IPR001128:Cytochrome P450
LOC111398466	536.723	2.46671	5.52781	0.175454	14.059	6.79e-45	1.43e-43	XP_022881142.1	monocopper_oxidase-like_protein_SKU5	Olive	PF00394:Multicopper_oxidase//PF07731:Multicopper_oxidase//PF07732:Multicopper_oxidase	IPR000916:Bet v I/Major latex protein//IPR023393:START-like domain superfamily
LOC111369858	887.811	2.46409	5.51779	0.153188	16.0854	3.23e-58	9.57e-57	XP_022847322.1	kinesin-like_protein_KIN-14I,_transcript_variant_X2	Olive	PF00225:Kinesin_motor_domain//PF00307:Calponin_homology_(CH)_domain
LOC111367137	174.402	2.4563	5.48808	0.242977	10.1092	5.03e-24	5.24e-23		uncharacterized_LOC111367137,_transcript_variant_X4	Olive
LOC111369874	200.664	2.45419	5.48004	0.233534	10.5089	7.86e-26	8.81e-25	XP_022847349.1	uncharacterized_LOC111369874	Olive
LOC111407653	1557.74	2.45203	5.47187	0.125889	19.4778	1.69e-84	8.13e-83	XP_022893036.1	transcription_factor_MYB8-like	Olive	PF00249:Myb-like_DNA-binding_domain
LOC111395653	428.554	2.44849	5.45843	0.201379	12.1586	5.16e-34	7.84e-33	XP_022877512.1	kinesin-like_protein_KIN-14N	Olive	PF00225:Kinesin_motor_domain	IPR030386:GB1/RHD3-type guanine nucleotide-binding (G) domain//IPR008803:RHD3/Sey1//IPR027417:P-loop containing nucleoside triphosphate hydrolase
LOC111373999	433.775	2.44844	5.45825	0.190389	12.8602	7.54e-38	1.28e-36	XP_022852368.1	serine_carboxypeptidase-like_45	Olive	PF00450:Serine_carboxypeptidase	IPR001623:DnaJ domain//IPR036869:Chaperone J-domain superfamily
LOC111368961	283.082	2.44007	5.42667	0.200474	12.1715	4.41e-34	6.71e-33		interactor_of_constitutive_active_ROPs_2,_chloroplastic-like	Olive		IPR019775:WD40 repeat, conserved site//IPR036322:WD40-repeat-containing domain superfamily//IPR001680:WD40 repeat//IPR000009:Protein phosphatase 2A regulatory subunit PR55//IPR018067:Protein phosphatase 2A regulatory subunit PR55, conserved site
LOC111407353	119.831	2.43803	5.41902	0.318768	7.64831	2.04e-14	1.32e-13		glucan_endo-1,3-beta-glucosidase_4-like	Olive
LOC111408694	648.857	2.43774	5.41792	0.180885	13.4767	2.14e-41	4.09e-40	XP_022894213.1	lysM_domain-containing_GPI-anchored_protein_1-like	Olive	PF01476:LysM_domain
LOC111398861	586.448	2.43099	5.39263	0.159701	15.2221	2.52e-52	6.42e-51	XP_022881768.1	uncharacterized_protein_At3g61260,_transcript_variant_X2	Olive	PF03763:Remorin,_C-terminal_region	IPR029044:Nucleotide-diphospho-sugar transferases
LOC111409485	355.897	2.43084	5.39206	0.234777	10.3538	4.02e-25	4.38e-24	XP_022895300.1	sterol-4-alpha-carboxylate_3-dehydrogenase,_decarboxylating-like	Olive	PF01370:NAD_dependent_epimerase/dehydratase_family	IPR020846:Major facilitator superfamily domain//IPR036259:MFS transporter superfamily
LOC111370536	173.038	2.42525	5.37122	0.242225	10.0124	1.34e-23	1.38e-22	XP_022848048.1	protein_SCAR1-like,_transcript_variant_X2	Olive		IPR009057:Homeobox-like domain superfamily//IPR001005:SANT/Myb domain//IPR017930:Myb domain
LOC111366190	61.5546	2.42522	5.37111	0.426902	5.68097	1.34e-08	5.69e-08	XP_022842656.1	proline-rich_receptor-like_protein_kinase_PERK15,_transcript_variant_X3	Olive	PF07714:Protein_tyrosine_kinase
LOC111382429	306.659	2.42498	5.3702	0.212756	11.3979	4.28e-30	5.67e-29	XP_022862171.1	xyloglucan_endotransglucosylase/hydrolase_protein_31-like	Olive	PF06955:Xyloglucan_endo-transglycosylase_(XET)_C-terminus//PF00722:Glycosyl_hydrolases_family_16
LOC111399954	365.027	2.41945	5.34965	0.185682	13.0301	8.25e-39	1.45e-37	XP_022883200.1	protein_indeterminate-domain_9-like	Olive	PF12171:Zinc-finger_double-stranded_RNA-binding
LOC111398579	205.533	2.41674	5.33964	0.236483	10.2195	1.62e-24	1.73e-23	XP_022881313.1	probable_inactive_receptor_kinase_At4g23740	Olive	PF13855:Leucine_rich_repeat//PF00069:Protein_kinase_domain//PF12799:Leucine_Rich_repeats_(2_copies)//PF08263:Leucine_rich_repeat_N-terminal_domain
LOC111378685	149.756	2.41655	5.33892	0.275565	8.76943	1.8e-18	1.45e-17	XP_022857682.1	uncharacterized_LOC111378685	Olive		IPR009057:Homeobox-like domain superfamily//IPR001005:SANT/Myb domain//IPR036388:Winged helix-like DNA-binding domain superfamily//IPR007526:SWIRM domain//IPR017884:SANT domain
LOC111400965	725.014	2.41519	5.33389	0.159153	15.1752	5.16e-52	1.3e-50	XP_022884236.1	serine/threonine-protein_kinase_Nek6-like,_transcript_variant_X2	Olive	PF00069:Protein_kinase_domain	IPR036392:PLAT/LH2 domain superfamily//IPR001024:PLAT/LH2 domain//IPR037060:Catalase core domain superfamily
LOC111374179	71.1241	2.41289	5.32541	0.374552	6.44207	1.18e-10	5.92e-10	XP_022852577.1	NAD-dependent_protein_deacetylase_SRT1	Olive	PF02146:Sir2_family	IPR008271:Serine/threonine-protein kinase, active site//IPR001245:Serine-threonine/tyrosine-protein kinase, catalytic domain//IPR000719:Protein kinase domain//IPR011009:Protein kinase-like domain superfamily//IPR017441:Protein kinase, ATP binding site
LOC111396584	264.762	2.41019	5.31545	0.231748	10.4001	2.48e-25	2.73e-24	XP_022878759.1	uncharacterized_LOC111396584	Olive		IPR043140:Ribosomal protein S14/S29
LOC111382641	2466.54	2.40684	5.30311	0.120425	19.9863	7.25e-89	3.75e-87		aspartyl_protease_AED3-like	Olive		IPR003593:AAA+ ATPase domain//IPR027417:P-loop containing nucleoside triphosphate hydrolase
LOC111395879	337.201	2.40419	5.29337	0.193012	12.4561	1.29e-35	2.06e-34	XP_022877847.1	uncharacterized_LOC111395879	Olive
LOC111392438	323.738	2.40383	5.29205	0.219377	10.9575	6.12e-28	7.52e-27	XP_022873647.1	65-kDa_microtubule-associated_protein_3-like,_transcript_variant_X2	Olive	PF03999:Microtubule_associated_protein_(MAP65/ASE1_family)
LOC111395683	1379.61	2.40197	5.28526	0.147048	16.3346	5.6e-60	1.72e-58	XP_022877560.1	protochlorophyllide_reductase-like	Olive	PF00106:short_chain_dehydrogenase	IPR016135:Ubiquitin-conjugating enzyme/RWD-like//IPR000608:Ubiquitin-conjugating enzyme E2
LOC111390740	1839.23	2.39985	5.27747	0.134397	17.8564	2.58e-71	9.66e-70	XP_022871606.1	PLASMODESMATA_CALLOSE-BINDING_PROTEIN_3-like	Olive	PF07983:X8_domain	IPR021109:Aspartic peptidase domain superfamily//IPR001969:Aspartic peptidase, active site
LOC111392080	1783.57	2.39674	5.26612	0.153403	15.6238	5.01e-55	1.37e-53	XP_022873127.1	chitinase-like_protein_1,_transcript_variant_X5	Olive	PF00182:Chitinase_class_I	IPR011050:Pectin lyase fold/virulence factor//IPR006626:Parallel beta-helix repeat
LOC111366239	88.4559	2.39287	5.25199	0.343525	6.96561	3.27e-12	1.83e-11	XP_022842750.1	thaumatin-like_protein,_transcript_variant_X4	Olive	PF00314:Thaumatin_family
LOC111366404	116.191	2.39158	5.24731	0.290451	8.23401	1.81e-16	1.32e-15	XP_022842935.1	uncharacterized_LOC111366404	Olive		IPR008930:Terpenoid cyclases/protein prenyltransferase alpha-alpha toroid//IPR008949:Isoprenoid synthase domain superfamily//IPR036965:Terpene synthase, N-terminal domain superfamily//IPR034741:Terpene cyclase-like 1, C-terminal domain
LOC111377531	2154.52	2.39078	5.24441	0.115757	20.6534	9.1e-95	5.07e-93	XP_022856426.1	pectinesterase_inhibitor_9-like	Olive	PF04043:Plant_invertase/pectin_methylesterase_inhibitor	IPR013083:Zinc finger, RING/FYVE/PHD-type//IPR001841:Zinc finger, RING-type
LOC111393461	125.069	2.3896	5.24013	0.279173	8.55957	1.13e-17	8.81e-17	XP_022874759.1	uncharacterized_LOC111393461	Olive	PF06749:Protein_of_unknown_function_(DUF1218)
LOC111407652	139.882	2.38156	5.21101	0.272964	8.72484	2.67e-18	2.13e-17	XP_022893035.1	short-chain_dehydrogenase_TIC_32,_chloroplastic-like	Olive	PF00106:short_chain_dehydrogenase	IPR001251:CRAL-TRIO lipid binding domain//IPR036865:CRAL-TRIO lipid binding domain superfamily//IPR009038:GOLD domain//IPR036598:GOLD domain superfamily//IPR036273:CRAL/TRIO, N-terminal domain superfamily//IPR011074:CRAL/TRIO, N-terminal domain
LOC111400982	214.336	2.37967	5.20418	0.219565	10.8381	2.27e-27	2.72e-26	XP_022884291.1	IRK-interacting_protein-like,_transcript_variant_X5	Olive		IPR006880:INO80 complex subunit B-like conserved region
LOC111366038	581.537	2.37463	5.18604	0.149363	15.8983	6.51e-57	1.85e-55	XP_022842435.1	NDR1/HIN1-like_protein_1	Olive	PF03168:Late_embryogenesis_abundant_protein	IPR036893:SBP domain superfamily//IPR004333:SBP domain
LOC111365320	723.026	2.36669	5.15758	0.150182	15.7588	5.97e-56	1.67e-54	XP_022841537.1	patellin-3-like	Olive	PF00650:CRAL/TRIO_domain//PF03765:CRAL/TRIO,_N-terminal_domain
LOC111367090	151.647	2.36572	5.15409	0.263487	8.9785	2.74e-19	2.3e-18	XP_022843568.1	PLASMODESMATA_CALLOSE-BINDING_PROTEIN_3-like	Olive	PF07983:X8_domain	IPR017907:Zinc finger, RING-type, conserved site//IPR013083:Zinc finger, RING/FYVE/PHD-type//IPR001841:Zinc finger, RING-type
LOC111383703	190.283	2.36326	5.14532	0.237367	9.95613	2.37e-23	2.4e-22	XP_022863604.1	chromo_domain_protein_LHP1-like,_transcript_variant_X2	Olive	PF00385:Chromo_(CHRromatin_Organisation_MOdifier)_domain
LOC111398491	480.083	2.3632	5.14511	0.166595	14.1853	1.13e-45	2.45e-44	XP_022881179.1	signal_recognition_particle_43_kDa_protein,_chloroplastic	Olive	PF13857:Ankyrin_repeats_(many_copies)//PF00385:Chromo_(CHRromatin_Organisation_MOdifier)_domain
LOC111367580	1465.84	2.363	5.14439	0.134214	17.6062	2.21e-69	8.01e-68	XP_022844299.1	L-ascorbate_oxidase_homolog	Olive	PF07731:Multicopper_oxidase//PF00394:Multicopper_oxidase//PF07732:Multicopper_oxidase
LOC111409153	158.193	2.3621	5.1412	0.264374	8.9347	4.08e-19	3.4e-18	XP_022894886.1	aspartic_proteinase_nepenthesin-1	Olive	PF14541:Xylanase_inhibitor_C-terminal//PF14543:Xylanase_inhibitor_N-terminal	IPR036093:NAC domain superfamily//IPR003441:NAC domain
LOC111405079	2295.51	2.35944	5.13171	0.131385	17.9581	4.14e-72	1.59e-70	XP_022889551.1	pectinesterase-like	Olive	PF04043:Plant_invertase/pectin_methylesterase_inhibitor//PF01095:Pectinesterase
LOC111410629	305.939	2.35941	5.1316	0.200181	11.7864	4.59e-32	6.57e-31			Olive		IPR006918:COBRA, plant
LOC111407320	202.707	2.35908	5.13044	0.249825	9.44294	3.62e-21	3.32e-20	XP_022892504.1	rho_GTPase-activating_protein_6-like	Olive	PF00169:PH_domain//PF00620:RhoGAP_domain//PF14389:Leucine-zipper_of_ternary_complex_factor_MIP1	IPR020565:Imidazoleglycerol-phosphate dehydratase, conserved site//IPR020568:Ribosomal protein S5 domain 2-type fold//IPR038494:Imidazole glycerol phosphate dehydratase domain superfamily//IPR000807:Imidazoleglycerol-phosphate dehydratase
LOC111388765	69.9435	2.35805	5.12677	0.370997	6.35598	2.07e-10	1.02e-09	XP_022869332.1	NDR1/HIN1-like_protein_1	Olive	PF03168:Late_embryogenesis_abundant_protein
LOC111411982	532.242	2.35656	5.12147	0.153461	15.356	3.23e-53	8.41e-52	XP_022898463.1	uncharacterized_LOC111411982	Olive	PF04788:Protein_of_unknown_function_(DUF620)	IPR029055:Nucleophile aminohydrolases, N-terminal//IPR014729:Rossmann-like alpha/beta/alpha sandwich fold//IPR017932:Glutamine amidotransferase type 2 domain//IPR006426:Asparagine synthase, glutamine-hydrolyzing//IPR033738:Asparagine synthase, N-terminal domain//IPR001962:Asparagine synthase
LOC111411584	155.079	2.35622	5.12027	0.312176	7.54772	4.43e-14	2.8e-13	XP_022897855.1	B3_domain-containing_protein_At3g19184-like,_transcript_variant_X3	Olive	PF02362:B3_DNA_binding_domain	IPR001611:Leucine-rich repeat//IPR011009:Protein kinase-like domain superfamily//IPR032675:Leucine-rich repeat domain superfamily//IPR017441:Protein kinase, ATP binding site//IPR008271:Serine/threonine-protein kinase, active site//IPR000719:Protein kinase domain
LOC111387259	1580.22	2.35347	5.11054	0.117067	20.1036	6.86e-90	3.59e-88	XP_022867570.1	tubulin_beta-1_chain	Olive	PF03953:Tubulin_C-terminal_domain//PF00091:Tubulin/FtsZ_family,_GTPase_domain	IPR036249:Thioredoxin-like superfamily
LOC111381592	254.259	2.34606	5.08434	0.251485	9.32884	1.07e-20	9.56e-20	XP_022861155.1	cytokinin_riboside_5'-monophosphate_phosphoribohydrolase_LOG3-like	Olive	PF03641:Possible_lysine_decarboxylase	IPR014729:Rossmann-like alpha/beta/alpha sandwich fold
LOC111379443	1946.08	2.33688	5.0521	0.136121	17.1676	4.64e-66	1.58e-64	XP_022858585.1	chalcone_synthase_J-like	Olive	PF02797:Chalcone_and_stilbene_synthases,_C-terminal_domain//PF00195:Chalcone_and_stilbene_synthases,_N-terminal_domain	IPR036049:Ribosomal protein L29/L35 superfamily//IPR001854:Ribosomal protein L29/L35
LOC111401945	4084.87	2.33232	5.03616	0.104958	22.2214	2.13e-109	1.47e-107	XP_022885699.1	peroxidase_72-like	Olive	PF00141:Peroxidase	IPR000504:RNA recognition motif domain//IPR012677:Nucleotide-binding alpha-beta plait domain superfamily//IPR035979:RNA-binding domain superfamily
LOC111389957	493.342	2.33139	5.03291	0.164165	14.2015	8.96e-46	1.94e-44	XP_022870716.1	G-type_lectin_S-receptor-like_serine/threonine-protein_kinase_SD2-2	Olive	PF00069:Protein_kinase_domain//PF00954:S-locus_glycoprotein_domain//PF01453:D-mannose_binding_lectin	IPR001849:Pleckstrin homology domain//IPR031468:Synaptotagmin-like mitochondrial-lipid-binding domain
LOC111378327	131.528	2.32977	5.02724	0.292114	7.97554	1.52e-15	1.05e-14	XP_022857273.1	rop_guanine_nucleotide_exchange_factor_5-like	Olive	PF03759:PRONE_(Plant-specific_Rop_nucleotide_exchanger)
LOC111388435	169.789	2.32413	5.00764	0.263605	8.81672	1.18e-18	9.59e-18	XP_022868905.1	photosystem_I_reaction_center_subunit_IV_B,_chloroplastic-like	Olive	PF02427:Photosystem_I_reaction_centre_subunit_IV_/_PsaE	IPR006626:Parallel beta-helix repeat//IPR011050:Pectin lyase fold/virulence factor//IPR012334:Pectin lyase fold
LOC111395172	60.8045	2.31884	4.98931	0.440285	5.26668	1.39e-07	5.33e-07	XP_022876943.1	uncharacterized_LOC111395172	Olive		IPR027443:Isopenicillin N synthase-like
LOC111400820	202.681	2.31878	4.98912	0.226412	10.2414	1.29e-24	1.39e-23	XP_022884003.1	protein_WVD2-like_7,_transcript_variant_X3	Olive	PF06886:Targeting_protein_for_Xklp2_(TPX2)
LOC111404295	132.129	2.31474	4.97516	0.324413	7.13518	9.67e-13	5.61e-12	XP_022888892.1	probable_polygalacturonase	Olive	PF00295:Glycosyl_hydrolases_family_28	IPR023395:Mitochondrial carrier domain superfamily//IPR002067:Mitochondrial carrier protein//IPR018108:Mitochondrial substrate/solute carrier
LOC111403321	349.91	2.3139	4.97224	0.202446	11.4297	2.97e-30	3.96e-29	XP_022887543.1	uncharacterized_protein_At5g01610-like	Olive	PF04398:Protein_of_unknown_function,_DUF538	IPR018238:Glycoside hydrolase, family 14, conserved site//IPR001554:Glycoside hydrolase, family 14//IPR017853:Glycoside hydrolase superfamily
LOC111390026	209.873	2.31051	4.9606	0.220373	10.4846	1.02e-25	1.14e-24	XP_022870782.1	expansin-A6-like	Olive	PF03330:Lytic_transglycolase	IPR010989:SNARE//IPR000727:Target SNARE coiled-coil homology domain//IPR006012:Syntaxin/epimorphin, conserved site
LOC111371296	435.42	2.30828	4.95293	0.167972	13.7421	5.68e-43	1.14e-41	XP_022848964.1	transcription_factor_bHLH62-like,_transcript_variant_X2	Olive	PF00010:Helix-loop-helix_DNA-binding_domain	IPR005829:Sugar transporter, conserved site//IPR003663:Sugar/inositol transporter//IPR020846:Major facilitator superfamily domain//IPR036259:MFS transporter superfamily
LOC111378982	117.785	2.30581	4.94446	0.290933	7.92559	2.27e-15	1.55e-14	XP_022858058.1	pathogenesis-related_protein_PR-1-like	Olive	PF00188:Cysteine-rich_secretory_protein_family	IPR012337:Ribonuclease H-like superfamily
LOC111390367	329.449	2.30416	4.9388	0.186012	12.3872	3.07e-35	4.82e-34	XP_022871171.1	50S_ribosomal_protein_L12,_chloroplastic-like	Olive	PF00542:Ribosomal_protein_L7/L12_C-terminal_domain//PF16320:Ribosomal_protein_L7/L12_dimerisation_domain
LOC111403225	85.1145	2.30258	4.9334	0.354884	6.48827	8.68e-11	4.4e-10	XP_022887414.1	myosin-binding_protein_2-like	Olive	PF04576:Zein-binding	IPR037992:TRAPP complex, Trs33 subunit//IPR024096:NO signalling/Golgi transport ligand-binding domain superfamily
LOC111375170	166.868	2.30139	4.92934	0.27105	8.49067	2.05e-17	1.57e-16	XP_022853739.1	fasciclin-like_arabinogalactan_protein_15,_transcript_variant_X5	Olive	PF02469:Fasciclin_domain
LOC111401589	182.264	2.28801	4.88382	0.2459	9.30464	1.34e-20	1.2e-19	XP_022885167.1	uncharacterized_LOC111401589,_transcript_variant_X6	Olive
LOC111399885	155.257	2.28391	4.86995	0.250736	9.10881	8.33e-20	7.18e-19	XP_022883137.1	UPF0481_protein_At3g47200-like	Olive	PF03140:Plant_protein_of_unknown_function	IPR002528:Multi antimicrobial extrusion protein
LOC111367202	131.369	2.28249	4.86517	0.284132	8.03321	9.5e-16	6.62e-15	XP_022843725.1	protein_IRX15-LIKE-like	Olive	PF04669:Polysaccharide_biosynthesis	IPR036412:HAD-like superfamily//IPR006549:HAD-superfamily hydrolase,subfamily IIIA//IPR023214:HAD superfamily//IPR010021:HAD-superfamily phosphatase, YqeG-like
LOC111371645	102.776	2.28246	4.86508	0.307298	7.42752	1.11e-13	6.8e-13	XP_022849502.1	protein_IQ-DOMAIN_14	Olive	PF13178:Protein_of_unknown_function_(DUF4005)//PF00612:IQ_calmodulin-binding_motif
LOC111382798	304.41	2.27957	4.85535	0.201738	11.2997	1.32e-29	1.72e-28	XP_022862606.1	probable_serine/threonine-protein_kinase_PBL7	Olive	PF00069:Protein_kinase_domain
LOC111369485	1115.71	2.27943	4.85485	0.147515	15.4522	7.29e-54	1.94e-52	XP_022846778.1	heavy_metal-associated_isoprenylated_plant_protein_32-like	Olive	PF00403:Heavy-metal-associated_domain	IPR036756:H/ACA ribonucleoprotein complex, subunit Nop10 superfamily
LOC111371346	868.929	2.27744	4.84818	0.169291	13.4528	2.96e-41	5.62e-40	XP_022849038.1	cytochrome_b5-like	Olive	PF00173:Cytochrome_b5-like_Heme/Steroid_binding_domain	IPR013032:EGF-like, conserved site//IPR008271:Serine/threonine-protein kinase, active site//IPR017441:Protein kinase, ATP binding site//IPR000719:Protein kinase domain//IPR011009:Protein kinase-like domain superfamily
LOC111405643	64.8343	2.27136	4.82779	0.394213	5.76176	8.32e-09	3.6e-08	XP_022890386.1	protein_ABIL2-like	Olive
LOC111371485	103.561	2.27022	4.82396	0.298205	7.61295	2.68e-14	1.72e-13	XP_022849272.1	uncharacterized_LOC111371485	Olive
LOC111393690	400.698	2.26969	4.82218	0.169936	13.3561	1.09e-40	2.03e-39	XP_022875122.1	serine_hydroxymethyltransferase_2,_mitochondrial-like	Olive	PF00464:Serine_hydroxymethyltransferase	IPR035979:RNA-binding domain superfamily//IPR000504:RNA recognition motif domain//IPR012677:Nucleotide-binding alpha-beta plait domain superfamily
LOC111367658	132.673	2.26961	4.82194	0.333216	6.81124	9.68e-12	5.25e-11	XP_022844415.1	protein_IQ-DOMAIN_1-like	Olive	PF00612:IQ_calmodulin-binding_motif	IPR038469:tRNAHis guanylyltransferase Thg1 superfamily
LOC111383678	554.536	2.26909	4.8202	0.176312	12.8698	6.66e-38	1.14e-36	XP_022863579.1	trihelix_transcription_factor_GTL2	Olive	PF13837:Myb/SANT-like_DNA-binding_domain	IPR001214:SET domain//IPR013087:Zinc finger C2H2-type//IPR007728:Pre-SET domain
LOC111401973	163.851	2.26732	4.81429	0.242281	9.35825	8.11e-21	7.28e-20	XP_022885741.1	protein_MID1-COMPLEMENTING_ACTIVITY_1-like	Olive	PF04749:PLAC8_family
LOC111402545	278.922	2.26432	4.80427	0.231394	9.78554	1.3e-22	1.28e-21	XP_022886694.1	transcription_factor_TCP4-like	Olive	PF03634:TCP_family_transcription_factor	IPR008991:Translation protein SH3-like domain superfamily//IPR014722:Ribosomal protein L2, domain 2//IPR041985:Ribosomal protein L14, KOW motif
LOC111386282	649.52	2.26351	4.80159	0.192908	11.7336	8.57e-32	1.21e-30	XP_022866516.1	protein_IQ-DOMAIN_14	Olive	PF13178:Protein_of_unknown_function_(DUF4005)//PF00612:IQ_calmodulin-binding_motif	IPR004827:Basic-leucine zipper domain
LOC111368705	319.199	2.25597	4.77655	0.182221	12.3804	3.34e-35	5.24e-34	XP_022845881.1	uncharacterized_LOC111368705	Olive		IPR036168:AP-2 complex subunit mu, C-terminal superfamily//IPR028565:Mu homology domain
LOC111404672	2809.67	2.25298	4.76668	0.111152	20.2693	2.4e-91	1.28e-89	XP_022889212.1	secoisolariciresinol_dehydrogenase-like	Olive	PF00106:short_chain_dehydrogenase	IPR016158:Cullin homology domain//IPR036390:Winged helix DNA-binding domain superfamily//IPR036388:Winged helix-like DNA-binding domain superfamily//IPR036317:Cullin homology domain superfamily//IPR014786:Anaphase-promoting complex subunit 2, C-terminal
LOC111387955	305.757	2.25237	4.76465	0.186652	12.0672	1.57e-33	2.35e-32	XP_022868360.1	germin-like_protein_5-1	Olive	PF00190:Cupin
LOC111400951	1103.63	2.2513	4.76113	0.140587	16.0136	1.03e-57	3e-56	XP_022884209.1	protein_NSP-INTERACTING_KINASE_1-like,_transcript_variant_X4	Olive	PF00069:Protein_kinase_domain//PF13855:Leucine_rich_repeat	IPR036638:Helix-loop-helix DNA-binding domain superfamily//IPR011598:Myc-type, basic helix-loop-helix (bHLH) domain
LOC111368303	322.959	2.24787	4.7498	0.181197	12.4056	2.44e-35	3.84e-34			Olive		IPR013087:Zinc finger C2H2-type//IPR036236:Zinc finger C2H2 superfamily
LOC111408721	261.88	2.24719	4.74756	0.205804	10.9191	9.35e-28	1.14e-26			Olive		IPR036312:Bifunctional inhibitor/plant lipid transfer protein/seed storage helical domain superfamily//IPR016140:Bifunctional inhibitor/plant lipid transfer protein/seed storage helical domain//IPR000528:Plant lipid transfer protein/Par allergen
LOC111374639	608.152	2.24249	4.73214	0.148981	15.0522	3.34e-51	8.25e-50	XP_022853113.1	protein_UPSTREAM_OF_FLC,_transcript_variant_X5	Olive	PF06136:Domain_of_unknown_function_(DUF966)	IPR036318:FAD-binding, type PCMH-like superfamily//IPR016169:FAD-binding, type PCMH, subdomain 2
LOC111404536	66.5265	2.2423	4.7315	0.38234	5.86468	4.5e-09	1.99e-08	XP_022889097.1	uncharacterized_LOC111404536	Olive		IPR036038:Aminotransferase-like, PLP-dependent enzymes//IPR043132:Branched-chain-amino-acid aminotransferase-like, C-terminal
LOC111405233	12891.1	2.24042	4.72536	0.225558	9.93282	3e-23	3.03e-22	XP_022889804.1	phosphoethanolamine_N-methyltransferase_1-like	Olive	PF08241:Methyltransferase_domain//PF13489:Methyltransferase_domain	IPR017441:Protein kinase, ATP binding site//IPR018451:NAF/FISL domain//IPR011009:Protein kinase-like domain superfamily//IPR000719:Protein kinase domain//IPR008271:Serine/threonine-protein kinase, active site
LOC111405985	74.6874	2.2377	4.71645	0.37111	6.02975	1.64e-09	7.54e-09	XP_022890904.1	laccase-22-like	Olive	PF00394:Multicopper_oxidase//PF07732:Multicopper_oxidase//PF07731:Multicopper_oxidase	IPR023393:START-like domain superfamily//IPR000916:Bet v I/Major latex protein
LOC111409339	952.523	2.23494	4.70743	0.135974	16.4365	1.05e-60	3.27e-59	XP_022895157.1	phospho-2-dehydro-3-deoxyheptonate_aldolase_1,_chloroplastic-like	Olive	PF01474:Class-II_DAHP_synthetase_family	IPR001841:Zinc finger, RING-type//IPR013083:Zinc finger, RING/FYVE/PHD-type
LOC111406477	266.764	2.23169	4.69685	0.24815	8.99332	2.4e-19	2.02e-18	XP_022891663.1	protein_MICRORCHIDIA_7-like	Olive	PF13589:Histidine_kinase-,_DNA_gyrase_B-,_and_HSP90-like_ATPase//PF17942:Morc6_ribosomal_protein_S5_domain_2-like	IPR036457:PPM-type phosphatase domain superfamily//IPR001932:PPM-type phosphatase domain
LOC111398900	2030.69	2.22907	4.68831	0.120821	18.4494	5.28e-76	2.18e-74	XP_022881827.1	expansin-A1-like	Olive	PF01357:Pollen_allergen//PF03330:Lytic_transglycolase	IPR027531:Eukaryotic translation initiation factor 3 subunit F//IPR037518:MPN domain//IPR000555:JAB1/MPN/MOV34 metalloenzyme domain
LOC111403815	211.027	2.22863	4.6869	0.218464	10.2014	1.96e-24	2.07e-23	XP_022888207.1	nitrate_regulatory_gene2_protein-like,_transcript_variant_X4	Olive	PF04782:Protein_of_unknown_function_(DUF632)	IPR035513:Invertase/pectin methylesterase inhibitor domain superfamily//IPR033131:Pectinesterase, Asp active site//IPR012334:Pectin lyase fold//IPR006501:Pectinesterase inhibitor domain//IPR011050:Pectin lyase fold/virulence factor
LOC111373885	1542.97	2.22622	4.67905	0.130973	16.9976	8.56e-65	2.86e-63	XP_022852245.1	aureusidin_synthase-like	Olive	PF12142:Polyphenol_oxidase_middle_domain//PF00264:Common_central_domain_of_tyrosinase//PF12143:Protein_of_unknown_function_(DUF_B2219)	IPR036525:Tubulin/FtsZ, GTPase domain superfamily//IPR002453:Beta tubulin//IPR018316:Tubulin/FtsZ, 2-layer sandwich domain//IPR003008:Tubulin/FtsZ, GTPase domain//IPR037103:Tubulin/FtsZ, C-terminal domain superfamily//IPR000217:Tubulin//IPR013838:Beta tubulin, autoregulation binding site//IPR008280:Tubulin/FtsZ, C-terminal//IPR023123:Tubulin, C-terminal//IPR017975:Tubulin, conserved site
LOC111392789	136.45	2.22425	4.67267	0.26465	8.40448	4.3e-17	3.24e-16	XP_022873952.1	protein_CURVATURE_THYLAKOID_1B,_chloroplastic-like	Olive	PF14159:CAAD_domains_of_cyanobacterial_aminoacyl-tRNA_synthetase
LOC111396757	273.024	2.2216	4.66409	0.20503	10.8355	2.34e-27	2.8e-26	XP_022879026.1	uncharacterized_LOC111396757	Olive		IPR005539:ELK domain//IPR001356:Homeobox domain//IPR009057:Homeobox-like domain superfamily//IPR005540:KNOX1//IPR005541:KNOX2
LOC111395395	83.6283	2.22152	4.66386	0.348742	6.3701	1.89e-10	9.35e-10	XP_022877136.1	65-kDa_microtubule-associated_protein_6-like	Olive	PF03999:Microtubule_associated_protein_(MAP65/ASE1_family)
LOC111367761	466.768	2.21985	4.65844	0.193947	11.4456	2.47e-30	3.3e-29	XP_022844573.1	uncharacterized_LOC111367761,_transcript_variant_X2	Olive
LOC111371548	103.573	2.21934	4.65679	0.329049	6.7447	1.53e-11	8.2e-11	XP_022849367.1	uncharacterized_LOC111371548	Olive	PF13947:Wall-associated_receptor_kinase_galacturonan-binding//PF14380:Wall-associated_receptor_kinase_C-terminal
LOC111393126	86.5467	2.21002	4.6268	0.33361	6.62455	3.48e-11	1.82e-10	XP_022874288.1	probable_GMP_synthase_[glutamine-hydrolyzing]	Olive	PF03352:Methyladenine_glycosylase
LOC111401039	52.8243	2.20911	4.62389	0.408937	5.40208	6.59e-08	2.61e-07	XP_022884339.1	30S_ribosomal_protein_3,_chloroplastic-like	Olive	PF04839:Plastid_and_cyanobacterial_ribosomal_protein_(PSRP-3_/_Ycf65)	IPR036396:Cytochrome P450 superfamily//IPR002401:Cytochrome P450, E-class, group I
LOC111387257	479.168	2.20672	4.61624	0.163204	13.5212	1.17e-41	2.25e-40	XP_022867568.1	FT-interacting_protein_1,_transcript_variant_X4	Olive	PF08372:Plant_phosphoribosyltransferase_C-terminal//PF00168:C2_domain
LOC111410569	542.213	2.20634	4.61501	0.168455	13.0975	3.4e-39	6.05e-38	XP_022896750.1	auxin-responsive_protein_SAUR50-like	Olive	PF02519:Auxin_responsive_protein	IPR010399:Tify domain
LOC111376249	297.577	2.19907	4.59183	0.231234	9.51015	1.9e-21	1.77e-20	XP_022854968.1	enolase_1,_chloroplastic	Olive	PF00113:Enolase,_C-terminal_TIM_barrel_domain//PF03952:Enolase,_N-terminal_domain	IPR004353:Vacuolar fusion protein Mon1
LOC111382469	76.1011	2.19142	4.56755	0.473769	4.6255	3.74e-06	1.22e-05	XP_022862251.1	uncharacterized_protein_At3g28850-like	Olive	PF00462:Glutaredoxin	IPR013083:Zinc finger, RING/FYVE/PHD-type//IPR011011:Zinc finger, FYVE/PHD-type
LOC111365318	134.301	2.18998	4.56298	0.27568	7.94391	1.96e-15	1.34e-14	XP_022841535.1	isoeugenol_synthase_1-like,_transcript_variant_X2	Olive	PF05368:NmrA-like_family	IPR002528:Multi antimicrobial extrusion protein
LOC111380681	84.0332	2.18981	4.56246	0.342195	6.3993	1.56e-10	7.76e-10	XP_022860078.1	fasciclin-like_arabinogalactan_protein_11	Olive	PF02469:Fasciclin_domain	IPR000953:Chromo/chromo shadow domain//IPR002110:Ankyrin repeat//IPR016197:Chromo-like domain superfamily//IPR036770:Ankyrin repeat-containing domain superfamily//IPR020683:Ankyrin repeat-containing domain
LOC111370764	394.972	2.18608	4.55067	0.286848	7.62103	2.52e-14	1.62e-13	XP_022848398.1	uncharacterized_LOC111370764	Olive	PF06749:Protein_of_unknown_function_(DUF1218)	IPR003347:JmjC domain
LOC111387626	170.341	2.18212	4.5382	0.239317	9.1181	7.65e-20	6.6e-19	XP_022867963.1	1-deoxy-D-xylulose-5-phosphate_synthase_1,_chloroplastic-like	Olive	PF13292:1-deoxy-D-xylulose-5-phosphate_synthase	IPR036590:SOS response associated peptidase-like
LOC111401639	162.759	2.18124	4.53544	0.25499	8.55424	1.19e-17	9.21e-17	XP_022885233.1	E2F_transcription_factor-like_E2FE	Olive	PF02319:E2F/DP_family_winged-helix_DNA-binding_domain	IPR036047:F-box-like domain superfamily
LOC111402543	425.643	2.1734	4.51084	0.179765	12.0902	1.19e-33	1.79e-32	XP_022886695.1	uncharacterized_LOC111402543	Olive
LOC111402059	239.806	2.17058	4.50205	0.224826	9.65449	4.71e-22	4.51e-21	XP_022885868.1	agamous-like_MADS-box_protein_AGL81	Olive	PF00319:SRF-type_transcription_factor_(DNA-binding_and_dimerisation_domain)	IPR010159:N-acyl-L-amino-acid amidohydrolase//IPR001261:ArgE/DapE/ACY1/CPG2/YscS, conserved site
LOC111412010	569.579	2.17024	4.50097	0.166953	12.9991	1.24e-38	2.16e-37	XP_022898505.1	glucomannan_4-beta-mannosyltransferase_2-like	Olive	PF13632:Glycosyl_transferase_family_group_2
LOC111391784	152.997	2.1693	4.49805	0.248969	8.71315	2.96e-18	2.35e-17	XP_022872815.1	syntaxin-112-like	Olive	PF05739:SNARE_domain//PF00804:Syntaxin	IPR012675:Beta-grasp domain superfamily//IPR016155:Molybdopterin synthase/thiamin biosynthesis sulphur carrier, beta-grasp//IPR028887:Molybdopterin synthase sulfur carrier subunit
LOC111403548	6037.7	2.16867	4.49608	0.150879	14.3736	7.58e-47	1.7e-45	XP_022887867.1	4-hydroxy-3-methylbut-2-en-1-yl_diphosphate_synthase_(ferredoxin),_chloroplastic-like,_transcript_variant_X2	Olive	PF04551:GcpE_protein	IPR029063:S-adenosyl-L-methionine-dependent methyltransferase
LOC111408281	334.958	2.1652	4.48529	0.177759	12.1806	3.95e-34	6.01e-33	XP_022893829.1	kinesin-like_protein_KIN-14R	Olive	PF11721:Malectin_domain//PF00225:Kinesin_motor_domain	IPR036938:Phosphatidic acid phosphatase type 2/haloperoxidase superfamily//IPR000326:Phosphatidic acid phosphatase type 2/haloperoxidase
LOC111386571	1751.63	2.16413	4.48196	0.121908	17.7522	1.66e-70	6.15e-69	XP_022866802.1	transcription_factor_TCP2-like	Olive	PF03634:TCP_family_transcription_factor	IPR029063:S-adenosyl-L-methionine-dependent methyltransferase
LOC111405846	1239.25	2.16186	4.4749	0.161949	13.349	1.2e-40	2.23e-39	XP_022890683.1	uncharacterized_LOC111405846	Olive	PF14365:Neprosin_activation_peptide//PF03080:Neprosin	IPR023329:Chlorophyll a/b binding domain superfamily
LOC111395562	374.907	2.15873	4.46522	0.200004	10.7934	3.7e-27	4.37e-26	XP_022877364.1	uncharacterized_LOC111395562	Olive	PF01436:NHL_repeat	IPR011989:Armadillo-like helical//IPR000225:Armadillo//IPR016024:Armadillo-type fold
LOC111387383	746.433	2.15804	4.4631	0.13483	16.0056	1.17e-57	3.4e-56	XP_022867707.1	heavy_metal-associated_isoprenylated_plant_protein_32-like	Olive
LOC111409041	92.3826	2.15797	4.46285	0.913022	2.36354	0.0181012	0.0336146		uncharacterized_LOC111409041,_transcript_variant_X2	Olive
LOC111403151	540.024	2.15387	4.4502	0.155396	13.8605	1.1e-43	2.24e-42	XP_022887314.1	interactor_of_constitutive_active_ROPs_2,_chloroplastic-like	Olive		IPR001611:Leucine-rich repeat//IPR032675:Leucine-rich repeat domain superfamily//IPR003591:Leucine-rich repeat, typical subtype
LOC111411458	610.056	2.15317	4.44803	0.20109	10.7075	9.39e-27	1.09e-25	XP_022897756.1	vegetative_cell_wall_protein_gp1-like	Olive		IPR036969:Citrate synthase superfamily//IPR010109:Citrate synthase, eukaryotic-type//IPR016142:Citrate synthase-like, large alpha subdomain//IPR002020:Citrate synthase//IPR019810:Citrate synthase active site//IPR016143:Citrate synthase-like, small alpha subdomain
LOC111381327	499.007	2.15153	4.44298	0.15312	14.0513	7.57e-45	1.6e-43	XP_022860877.1	ras-related_protein_RABA3	Olive	PF00071:Ras_family
LOC111380973	4369.22	2.14947	4.43664	0.194988	11.0236	2.94e-28	3.66e-27	XP_022860427.1	4-hydroxy-3-methylbut-2-enyl_diphosphate_reductase,_chloroplastic-like	Olive	PF02401:LytB_protein	IPR008927:6-phosphogluconate dehydrogenase-like, C-terminal domain superfamily//IPR006168:Glycerol-3-phosphate dehydrogenase, NAD-dependent//IPR013328:6-phosphogluconate dehydrogenase, domain 2//IPR036291:NAD(P)-binding domain superfamily
LOC111374368	210.059	2.13796	4.4014	0.220138	9.71194	2.68e-22	2.6e-21	XP_022852798.1	glucuronoxylan_4-O-methyltransferase_1-like	Olive	PF04669:Polysaccharide_biosynthesis	IPR001789:Signal transduction response regulator, receiver domain//IPR011006:CheY-like superfamily//IPR005467:Histidine kinase domain//IPR036097:Signal transduction histidine kinase, dimerisation/phosphoacceptor domain superfamily//IPR014525:Ethylene receptor//IPR036890:Histidine kinase/HSP90-like ATPase superfamily//IPR003661:Signal transduction histidine kinase, dimerisation/phosphoacceptor dom…
LOC111375587	536.676	2.13754	4.4001	0.16532	12.9297	3.06e-38	5.27e-37	XP_022854194.1	serine/threonine-protein_kinase_TIO	Olive	PF13646:HEAT_repeats//PF00069:Protein_kinase_domain	IPR006501:Pectinesterase inhibitor domain//IPR035513:Invertase/pectin methylesterase inhibitor domain superfamily//IPR011050:Pectin lyase fold/virulence factor//IPR012334:Pectin lyase fold
LOC111393553	125.489	2.13672	4.39761	0.288383	7.40932	1.27e-13	7.78e-13	XP_022874910.1	uncharacterized_LOC111393553	Olive	PF12576:Protein_of_unknown_function_(DUF3754)	IPR015915:Kelch-type beta propeller//IPR006652:Kelch repeat type 1
LOC111403988	7013.29	2.13648	4.39689	0.105662	20.2199	6.54e-91	3.47e-89	XP_022888451.1	secoisolariciresinol_dehydrogenase-like	Olive	PF13561:Enoyl-(Acyl_carrier_protein)_reductase	IPR001841:Zinc finger, RING-type//IPR013083:Zinc finger, RING/FYVE/PHD-type
LOC111399643	113.499	2.1352	4.39298	0.283168	7.5404	4.69e-14	2.95e-13	XP_022882843.1	uncharacterized_LOC111399643,_transcript_variant_X3	Olive		IPR036397:Ribonuclease H superfamily//IPR012337:Ribonuclease H-like superfamily//IPR043502:DNA/RNA polymerase superfamily//IPR002156:Ribonuclease H domain
LOC111409351	169.767	2.13503	4.39246	0.251526	8.4883	2.1e-17	1.61e-16	XP_022895176.1	protein_S-acyltransferase_21-like	Olive	PF01529:DHHC_palmitoyltransferase	IPR000760:Inositol monophosphatase-like//IPR011809:Histidinol-phosphate phosphatase, putative, inositol monophosphatase//IPR020583:Inositol monophosphatase, metal-binding site
LOC111399092	1664.11	2.12507	4.36224	0.116907	18.1775	7.78e-74	3.08e-72	XP_022882091.1	protein_HOTHEAD-like,_transcript_variant_X2	Olive	PF05199:GMC_oxidoreductase//PF00732:GMC_oxidoreductase	IPR036249:Thioredoxin-like superfamily//IPR011893:Selenoprotein, Rdx-type
LOC111397284	863.638	2.12442	4.36026	0.140131	15.1602	6.49e-52	1.63e-50	XP_022879897.1	probable_serine/threonine-protein_kinase_At1g01540	Olive	PF00069:Protein_kinase_domain
LOC111370037	1030.73	2.10903	4.314	0.126497	16.6726	2.08e-62	6.66e-61	XP_022847518.1	berberine_bridge_enzyme-like_15	Olive	PF01565:FAD_binding_domain//PF08031:Berberine_and_berberine_like	IPR000757:Glycoside hydrolase family 16//IPR016455:Xyloglucan endotransglucosylase/hydrolase//IPR013320:Concanavalin A-like lectin/glucanase domain superfamily
LOC111393284	237.443	2.1083	4.31184	0.214963	9.80775	1.04e-22	1.03e-21	XP_022874513.1	linoleate_13S-lipoxygenase_2-1,_chloroplastic-like	Olive	PF00305:Lipoxygenase//PF01477:PLAT/LH2_domain
LOC111403528	222.536	2.10027	4.28791	0.210303	9.98691	1.74e-23	1.77e-22	XP_022887839.1	NDR1/HIN1-like_protein_1	Olive	PF03168:Late_embryogenesis_abundant_protein	IPR002885:Pentatricopeptide repeat//IPR011990:Tetratricopeptide-like helical domain superfamily
LOC111401728	69.5528	2.0994	4.2853	0.475184	4.41807	9.96e-06	3.1e-05	XP_022885366.1	cytochrome_P450_78A5-like	Olive	PF00067:Cytochrome_P450
LOC111403804	165.977	2.0972	4.27878	0.26134	8.02478	1.02e-15	7.08e-15	XP_022888191.1	mitotic_checkpoint_protein_BUB3.1-like	Olive	PF00400:WD_domain,_G-beta_repeat
LOC111372248	113.587	2.09624	4.27593	0.287621	7.2882	3.14e-13	1.88e-12			Olive		IPR002885:Pentatricopeptide repeat//IPR011990:Tetratricopeptide-like helical domain superfamily
LOC111403425	378.227	2.09091	4.26016	0.176074	11.8751	1.59e-32	2.32e-31	XP_022887694.1	ubiquitin-conjugating_enzyme_E2_19-like	Olive	PF00179:Ubiquitin-conjugating_enzyme	IPR029063:S-adenosyl-L-methionine-dependent methyltransferase
LOC111408800	402.759	2.09002	4.25754	0.180667	11.5683	5.96e-31	8.14e-30	XP_022894339.1	subtilisin-like_protease_SBT1.9	Olive	PF05922:Peptidase_inhibitor_I9//PF17766:Fibronectin_type-III_domain//PF00082:Subtilase_family	IPR016140:Bifunctional inhibitor/plant lipid transfer protein/seed storage helical domain//IPR000528:Plant lipid transfer protein/Par allergen//IPR036312:Bifunctional inhibitor/plant lipid transfer protein/seed storage helical domain superfamily
LOC111404770	102.918	2.08769	4.25067	0.300348	6.9509	3.63e-12	2.03e-11		plant_intracellular_Ras-group-related_LRR_protein_5-like	Olive		IPR033749:Polyprenyl synthetase, conserved site//IPR008949:Isoprenoid synthase domain superfamily
LOC111393859	217.763	2.08647	4.24706	0.22207	9.39554	5.69e-21	5.15e-20	XP_022875373.1	probable_inactive_receptor-like_protein_kinase_At3g56050	Olive	PF07714:Protein_tyrosine_kinase//PF08263:Leucine_rich_repeat_N-terminal_domain	IPR020635:Tyrosine-protein kinase, catalytic domain//IPR011009:Protein kinase-like domain superfamily//IPR017441:Protein kinase, ATP binding site//IPR008266:Tyrosine-protein kinase, active site//IPR000719:Protein kinase domain
LOC111373549	267.35	2.08307	4.23708	0.192579	10.8167	2.87e-27	3.42e-26	XP_022851863.1	uncharacterized_LOC111373549	Olive		IPR006476:Conserved hypothetical protein CHP01589, plant
LOC111388217	961.518	2.07597	4.21626	0.131551	15.7806	4.23e-56	1.18e-54	XP_022868671.1	aquaporin_PIP1-1-like	Olive	PF00230:Major_intrinsic_protein
LOC111393546	98.0834	2.07146	4.20311	0.328939	6.29739	3.03e-10	1.47e-09	XP_022874892.1	phosphatidylinositol_transfer_protein_3-like,_transcript_variant_X2	Olive	PF00650:CRAL/TRIO_domain
LOC111409766	719.05	2.06933	4.1969	0.153222	13.5054	1.45e-41	2.78e-40	XP_022895556.1	non-specific_lipid-transfer_protein-like_protein_At2g13820	Olive	PF14368:Probable_lipid_transfer	IPR020811:Enolase, N-terminal//IPR020809:Enolase, conserved site//IPR000941:Enolase//IPR036849:Enolase-like, C-terminal domain superfamily//IPR029017:Enolase-like, N-terminal//IPR020810:Enolase, C-terminal TIM barrel domain
LOC111386165	214.893	2.06726	4.19091	0.215625	9.58732	9.04e-22	8.53e-21	XP_022866387.1	protein_STRUBBELIG-RECEPTOR_FAMILY_6-like	Olive	PF07714:Protein_tyrosine_kinase	IPR036163:Heavy metal-associated domain superfamily//IPR006121:Heavy metal-associated domain, HMA
LOC111397535	190.537	2.05731	4.1621	0.252629	8.14359	3.84e-16	2.74e-15	XP_022880286.1	cyclin-B2-3-like	Olive	PF02984:Cyclin,_C-terminal_domain//PF00134:Cyclin,_N-terminal_domain	IPR017884:SANT domain//IPR017930:Myb domain//IPR001005:SANT/Myb domain//IPR009057:Homeobox-like domain superfamily//IPR006447:Myb domain, plants
LOC111410300	1486.59	2.05634	4.1593	0.156334	13.1535	1.63e-39	2.92e-38	XP_022896336.1	aspartyl_protease_AED3-like	Olive	PF14541:Xylanase_inhibitor_C-terminal
LOC111394783	115.126	2.05514	4.15584	0.286599	7.17079	7.46e-13	4.35e-12	XP_022876534.1	transcription_factor_TCP8-like	Olive	PF03634:TCP_family_transcription_factor	IPR008263:Glycoside hydrolase, family 16, active site//IPR016455:Xyloglucan endotransglucosylase/hydrolase//IPR013320:Concanavalin A-like lectin/glucanase domain superfamily//IPR000757:Glycoside hydrolase family 16//IPR008264:Beta-glucanase
LOC111410398	398.572	2.0539	4.15227	0.228346	8.99467	2.37e-19	2e-18	XP_022896480.1	uncharacterized_protein_At4g00950,_transcript_variant_X2	Olive	PF05097:Protein_of_unknown_function_(DUF688)	IPR000408:Regulator of chromosome condensation, RCC1//IPR011011:Zinc finger, FYVE/PHD-type//IPR009091:Regulator of chromosome condensation 1/beta-lactamase-inhibitor protein II//IPR000306:FYVE zinc finger//IPR017455:Zinc finger, FYVE-related//IPR013591:Brevis radix (BRX) domain//IPR013083:Zinc finger, RING/FYVE/PHD-type
LOC111373556	2328.4	2.05237	4.14788	0.128725	15.9438	3.14e-57	9.04e-56	XP_022851873.1	glycine_dehydrogenase_(decarboxylating),_mitochondrial	Olive	PF02347:Glycine_cleavage_system_P-protein
LOC111370745	66.5686	2.0486	4.13704	0.417941	4.90165	9.5e-07	3.34e-06	XP_022848371.1	E3_ubiquitin-protein_ligase_At1g63170-like,_transcript_variant_X2	Olive	PF13639:Ring_finger_domain	IPR018247:EF-Hand 1, calcium-binding site//IPR002048:EF-hand domain//IPR000719:Protein kinase domain//IPR017441:Protein kinase, ATP binding site//IPR011992:EF-hand domain pair//IPR008271:Serine/threonine-protein kinase, active site//IPR011009:Protein kinase-like domain superfamily
LOC111386099	1419.75	2.04675	4.13175	0.12894	15.8737	9.64e-57	2.74e-55	XP_022866347.1	protein_SCAR3-like,_transcript_variant_X8	Olive
LOC111382923	312.455	2.04336	4.12203	0.183741	11.1209	9.93e-29	1.26e-27	XP_022862730.1	cellulose_synthase-like_protein_D2,_transcript_variant_X8	Olive	PF14570:RING/Ubox_like_zinc-binding_domain//PF03552:Cellulose_synthase	IPR003340:B3 DNA binding domain//IPR015300:DNA-binding pseudobarrel domain superfamily
LOC111389589	357.496	2.04197	4.11809	0.193391	10.5588	4.63e-26	5.25e-25	XP_022870283.1	B-cell_receptor-associated_protein_31-like	Olive		IPR036322:WD40-repeat-containing domain superfamily//IPR015943:WD40/YVTN repeat-like-containing domain superfamily
LOC111397973	260.421	2.04108	4.11554	0.19466	10.4854	1.01e-25	1.13e-24	XP_022880704.1	uncharacterized_LOC111397973	Olive	PF12719:Nuclear_condensing_complex_subunits,_C-term_domain
LOC111372857	82.2223	2.04096	4.1152	0.33821	6.0346	1.59e-09	7.33e-09	XP_022851039.1	protein_trichome_birefringence-like_33	Olive	PF13839:GDSL/SGNH-like_Acyl-Esterase_family_found_in_Pmr5_and_Cas1p//PF14416:PMR5_N_terminal_Domain
LOC111390084	150.885	2.04081	4.11477	0.270291	7.55043	4.34e-14	2.74e-13		organic_cation/carnitine_transporter_7-like	Olive
LOC111371453	1592.92	2.03921	4.11019	0.158077	12.9001	4.49e-38	7.7e-37	XP_022849218.1	glutamine_synthetase_leaf_isozyme,_chloroplastic	Olive	PF00120:Glutamine_synthetase,_catalytic_domain//PF03951:Glutamine_synthetase,_beta-Grasp_domain	IPR020818:GroES chaperonin family//IPR011032:GroES-like superfamily//IPR018369:Chaperonin GroES, conserved site//IPR037124:GroES chaperonin superfamily
LOC111404094	412.846	2.03884	4.10916	0.183306	11.1226	9.74e-29	1.23e-27	XP_022888596.1	L-type_lectin-domain_containing_receptor_kinase_VIII.1-like	Olive	PF00139:Legume_lectin_domain//PF00069:Protein_kinase_domain	IPR016024:Armadillo-type fold//IPR011989:Armadillo-like helical//IPR001494:Importin-beta, N-terminal domain
LOC111383095	341.096	2.03877	4.10895	0.173985	11.7181	1.03e-31	1.45e-30	XP_022862932.1	AT-hook_motif_nuclear-localized_protein_5-like	Olive	PF03479:Plants_and_Prokaryotes_Conserved_(PCC)_domain	IPR029063:S-adenosyl-L-methionine-dependent methyltransferase
LOC111402506	661.869	2.03866	4.10865	0.13979	14.5838	3.56e-48	8.25e-47	XP_022886639.1	pectinesterase_2.1-like	Olive	PF01095:Pectinesterase//PF04043:Plant_invertase/pectin_methylesterase_inhibitor
LOC111403525	616.083	2.03329	4.09338	0.144588	14.0627	6.44e-45	1.36e-43	XP_022887835.1	secoisolariciresinol_dehydrogenase-like	Olive	PF13561:Enoyl-(Acyl_carrier_protein)_reductase	IPR003578:Small GTPase Rho//IPR027417:P-loop containing nucleoside triphosphate hydrolase//IPR005225:Small GTP-binding protein domain
LOC111386566	54.0823	2.03082	4.08638	0.428858	4.73542	2.19e-06	7.39e-06	XP_022866799.1	SNARE-interacting_protein_KEULE-like	Olive	PF00995:Sec1_family
LOC111382294	78.5674	2.02423	4.06775	0.412378	4.90868	9.17e-07	3.23e-06	XP_022861981.1	protein_trichome_birefringence-like_10	Olive	PF14416:PMR5_N_terminal_Domain//PF13839:GDSL/SGNH-like_Acyl-Esterase_family_found_in_Pmr5_and_Cas1p
LOC111390962	188.996	2.01605	4.04476	0.231147	8.72197	2.73e-18	2.18e-17	XP_022871861.1	protein_JASON	Olive		IPR012677:Nucleotide-binding alpha-beta plait domain superfamily//IPR000504:RNA recognition motif domain//IPR035979:RNA-binding domain superfamily//IPR034148:NCBP2, RNA recognition motif
LOC111365911	171.894	2.01434	4.03996	0.248354	8.11078	5.03e-16	3.56e-15	XP_022842233.1	probably_inactive_leucine-rich_repeat_receptor-like_protein_kinase_At5g06940,_transcript_variant_X3	Olive	PF13855:Leucine_rich_repeat//PF00069:Protein_kinase_domain//PF08263:Leucine_rich_repeat_N-terminal_domain
LOC111402515	208.87	2.0107	4.02979	0.215736	9.32019	1.16e-20	1.03e-19	XP_022886650.1	uncharacterized_LOC111402515	Olive	PF04398:Protein_of_unknown_function,_DUF538	IPR032675:Leucine-rich repeat domain superfamily
LOC111380844	715.442	2.00602	4.01673	0.158669	12.6428	1.23e-36	2.01e-35	XP_022860271.1	GDSL_esterase/lipase_At5g03610-like	Olive	PF00657:GDSL-like_Lipase/Acylhydrolase	IPR011053:Single hybrid motif//IPR036625:E3-binding domain superfamily//IPR003016:2-oxo acid dehydrogenase, lipoyl-binding site//IPR004167:Peripheral subunit-binding domain//IPR006257:Dihydrolipoyllysine-residue acetyltransferase component of pyruvate dehydrogenase complex//IPR023213:Chloramphenicol acetyltransferase-like domain superfamily//IPR000089:Biotin/lipoyl attachment
LOC111382832	58.4694	2.00595	4.01653	0.42303	4.74186	2.12e-06	7.18e-06	XP_022862645.1	transcription_factor_bHLH93-like	Olive	PF00010:Helix-loop-helix_DNA-binding_domain
LOC111383967	61.3084	2.00586	4.01628	0.37054	5.41333	6.19e-08	2.46e-07	XP_022863938.1	uncharacterized_LOC111383967	Olive	PF00240:Ubiquitin_family	IPR015943:WD40/YVTN repeat-like-containing domain superfamily//IPR001680:WD40 repeat//IPR011048:Cytochrome cd1-nitrite reductase-like, haem d1 domain superfamily//IPR020472:G-protein beta WD-40 repeat//IPR019775:WD40 repeat, conserved site//IPR036322:WD40-repeat-containing domain superfamily//IPR016391:Coatomer alpha subunit//IPR017986:WD40-repeat-containing domain
LOC111380940	386.863	2.00533	4.01481	0.175709	11.4128	3.61e-30	4.8e-29		uncharacterized_GPI-anchored_protein_At4g28100-like	Olive
LOC111400865	638.337	2.0034	4.00945	0.145076	13.8094	2.24e-43	4.52e-42	XP_022884074.1	protein_ALTERED_XYLOGLUCAN_4-like,_transcript_variant_X2	Olive	PF13839:GDSL/SGNH-like_Acyl-Esterase_family_found_in_Pmr5_and_Cas1p//PF14416:PMR5_N_terminal_Domain	IPR036412:HAD-like superfamily
LOC111369732	72.3683	1.99827	3.9952	0.344365	5.80277	6.52e-09	2.85e-08	XP_022847133.1	glucan_endo-1,3-beta-glucosidase_9	Olive	PF07983:X8_domain//PF00332:Glycosyl_hydrolases_family_17
LOC111388940	234.535	1.99818	3.99496	0.206856	9.65979	4.47e-22	4.28e-21	XP_022869540.1	kinesin-like_protein_KIN-10B,_transcript_variant_X3	Olive	PF00225:Kinesin_motor_domain	IPR036514:SGNH hydrolase superfamily
LOC111409271	61.9697	1.99694	3.99152	0.371118	5.38087	7.41e-08	2.92e-07	XP_022895057.1	30S_ribosomal_protein_S21,_chloroplastic	Olive	PF01165:Ribosomal_protein_S21	IPR004087:K Homology domain//IPR036612:K Homology domain, type 1 superfamily
LOC111400592	219.759	1.99001	3.97239	0.207769	9.57797	9.9e-22	9.32e-21			Olive		IPR032675:Leucine-rich repeat domain superfamily//IPR001611:Leucine-rich repeat//IPR011009:Protein kinase-like domain superfamily//IPR003591:Leucine-rich repeat, typical subtype//IPR000719:Protein kinase domain
LOC111388762	1252.06	1.98996	3.97227	0.131849	15.0928	1.81e-51	4.48e-50	XP_022869326.1	beta-glucosidase_BoGH3B-like,_transcript_variant_X2	Olive	PF00933:Glycosyl_hydrolase_family_3_N_terminal_domain//PF01915:Glycosyl_hydrolase_family_3_C-terminal_domain	IPR023313:Ubiquitin-conjugating enzyme, active site//IPR000608:Ubiquitin-conjugating enzyme E2//IPR016135:Ubiquitin-conjugating enzyme/RWD-like
LOC111390802	135.658	1.98539	3.95971	0.322913	6.14839	7.83e-10	3.69e-09	XP_022871686.1	kinesin-like_protein_KIN-10C,_transcript_variant_X2	Olive	PF12836:Helix-hairpin-helix_motif//PF00225:Kinesin_motor_domain	IPR000403:Phosphatidylinositol 3-/4-kinase, catalytic domain//IPR036940:Phosphatidylinositol 3-/4-kinase, catalytic domain superfamily//IPR011009:Protein kinase-like domain superfamily//IPR035892:C2 domain superfamily//IPR018936:Phosphatidylinositol 3/4-kinase, conserved site//IPR002420:Phosphatidylinositol 3-kinase, C2 domain//IPR008290:Phosphatidylinositol 3-kinase, Vps34 type
LOC111383528	155.865	1.98153	3.94913	0.242235	8.18021	2.83e-16	2.04e-15	XP_022863412.1	ethylene-responsive_transcription_factor_ERF038-like	Olive	PF00847:AP2_domain
LOC111369396	71.8861	1.98046	3.9462	0.389632	5.08291	3.72e-07	1.37e-06	XP_022846666.1	fasciclin-like_arabinogalactan_protein_11	Olive	PF02469:Fasciclin_domain	IPR003591:Leucine-rich repeat, typical subtype//IPR001611:Leucine-rich repeat//IPR000719:Protein kinase domain//IPR032675:Leucine-rich repeat domain superfamily//IPR011009:Protein kinase-like domain superfamily
LOC111377534	116.571	1.98031	3.94579	0.302979	6.53613	6.31e-11	3.24e-10		uncharacterized_LOC111377534	Olive
LOC111374039	265.026	1.9801	3.9452	0.198143	9.99327	1.63e-23	1.67e-22	XP_022852429.1	uncharacterized_LOC111374039	Olive	PF02519:Auxin_responsive_protein
LOC111397266	521.52	1.97856	3.94099	0.171289	11.551	7.3e-31	9.93e-30	XP_022879865.1	putative_dihydroflavonol_4-reductase,_transcript_variant_X2	Olive	PF01370:NAD_dependent_epimerase/dehydratase_family
LOC111396930	90.2059	1.9727	3.92503	0.307726	6.41059	1.45e-10	7.22e-10	XP_022879314.1	protein_KINESIN_LIGHT_CHAIN-RELATED_2-like	Olive	PF13181:Tetratricopeptide_repeat//PF13424:Tetratricopeptide_repeat	IPR036291:NAD(P)-binding domain superfamily
LOC111410815	1848.3	1.97231	3.92395	0.126556	15.5845	9.28e-55	2.52e-53	XP_022897140.1	fasciclin-like_arabinogalactan_protein_8	Olive	PF02469:Fasciclin_domain	IPR000504:RNA recognition motif domain//IPR035979:RNA-binding domain superfamily//IPR002483:PWI domain//IPR036483:PWI domain superfamily//IPR012677:Nucleotide-binding alpha-beta plait domain superfamily//IPR034268:RBM25, RNA recognition motif
LOC111398562	60.1585	1.97204	3.92323	0.447137	4.41037	1.03e-05	3.2e-05	XP_022881291.1	endoglucanase-like	Olive	PF00150:Cellulase_(glycosyl_hydrolase_family_5)
LOC111365399	179.492	1.96873	3.91424	0.253709	7.7598	8.51e-15	5.62e-14	XP_022841676.1	probable_leucine-rich_repeat_receptor-like_protein_kinase_At5g49770,_transcript_variant_X6	Olive	PF07714:Protein_tyrosine_kinase	IPR027417:P-loop containing nucleoside triphosphate hydrolase//IPR038005:Virus X resistance protein-like, coiled-coil domain//IPR032675:Leucine-rich repeat domain superfamily
LOC111397204	94.087	1.96849	3.91357	0.302555	6.50621	7.71e-11	3.92e-10	XP_022879768.1	uncharacterized_LOC111397204,_transcript_variant_X2	Olive		IPR011009:Protein kinase-like domain superfamily
LOC111375183	1738.83	1.96792	3.91204	0.137524	14.3097	1.9e-46	4.21e-45	XP_022853751.1	plastidial_pyruvate_kinase_2-like	Olive	PF00224:Pyruvate_kinase,_barrel_domain//PF02887:Pyruvate_kinase,_alpha/beta_domain
LOC111391536	184.609	1.96725	3.91021	0.226169	8.69811	3.37e-18	2.68e-17	XP_022872542.1	thymidine_kinase-like	Olive	PF00265:Thymidine_kinase	IPR003729:Bifunctional nuclease domain//IPR036104:Bifunctional nuclease superfamily
LOC111411619	1316.75	1.96582	3.90635	0.119419	16.4616	6.93e-61	2.18e-59	XP_022897901.1	xylulose_5-phosphate/phosphate_translocator,_chloroplastic-like	Olive	PF03151:Triose-phosphate_Transporter_family	IPR003593:AAA+ ATPase domain//IPR036181:MIT domain superfamily//IPR027417:P-loop containing nucleoside triphosphate hydrolase//IPR003960:ATPase, AAA-type, conserved site//IPR007330:MIT
LOC111376493	863.703	1.96505	3.90427	0.186963	10.5104	7.74e-26	8.68e-25	XP_022855223.1	65-kDa_microtubule-associated_protein_1-like,_transcript_variant_X2	Olive	PF03999:Microtubule_associated_protein_(MAP65/ASE1_family)
LOC111412020	818.413	1.95836	3.88621	0.19105	10.2505	1.18e-24	1.26e-23	XP_022898524.1	putative_phytosulfokines_6	Olive	PF06404:Phytosulfokine_precursor_protein_(PSK)	IPR006636:Heat shock chaperonin-binding//IPR000626:Ubiquitin-like domain//IPR015940:Ubiquitin-associated domain//IPR029071:Ubiquitin-like domain superfamily//IPR009060:UBA-like superfamily
LOC111406193	144.916	1.9556	3.87876	0.256058	7.63733	2.22e-14	1.43e-13	XP_022891230.1	myb_family_transcription_factor_PHL8-like,_transcript_variant_X2	Olive	PF14379:MYB-CC_type_transfactor,_LHEQLE_motif//PF00249:Myb-like_DNA-binding_domain	IPR027356:NPH3 domain//IPR011333:SKP1/BTB/POZ domain superfamily//IPR000210:BTB/POZ domain
LOC111365450	178.161	1.94589	3.85274	0.240704	8.08413	6.26e-16	4.42e-15	XP_022841766.1	scarecrow-like_protein_4	Olive	PF03514:GRAS_domain_family	IPR009071:High mobility group box domain//IPR036431:ARID DNA-binding domain superfamily//IPR036910:High mobility group box domain superfamily//IPR001606:ARID DNA-binding domain
LOC111397847	150.868	1.94255	3.84386	0.245182	7.92291	2.32e-15	1.58e-14			Olive		IPR036600:Paired amphipathic helix superfamily//IPR003822:Paired amphipathic helix
LOC111394514	1463.8	1.93597	3.82634	0.14221	13.6134	3.33e-42	6.51e-41	XP_022876141.1	classical_arabinogalactan_protein_5-like	Olive		IPR013766:Thioredoxin domain//IPR036249:Thioredoxin-like superfamily
LOC111368652	72.2387	1.93456	3.82263	0.345433	5.60041	2.14e-08	8.9e-08	XP_022845788.1	amino_acid_permease_8-like	Olive	PF01490:Transmembrane_amino_acid_transporter_protein	IPR042460:DCN1-like, PONY binding domain//IPR005176:Potentiating neddylation domain
LOC111381064	137.338	1.93202	3.81588	0.331709	5.82442	5.73e-09	2.52e-08	XP_022860541.1	myosin_heavy_chain,_striated_muscle-like	Olive	PF10358:N-terminal_C2_in_EEIG1_and_EHBP1_proteins	IPR036893:SBP domain superfamily//IPR004333:SBP domain
LOC111408157	106.866	1.93168	3.815	0.330615	5.8427	5.14e-09	2.27e-08	XP_022893727.1	uncharacterized_LOC111408157	Olive
LOC111400643	1337.18	1.92304	3.79221	0.163703	11.7472	7.3e-32	1.04e-30	XP_022883815.1	ferredoxin,_root_R-B1-like,_transcript_variant_X2	Olive	PF00111:2Fe-2S_iron-sulfur_cluster_binding_domain	IPR009057:Homeobox-like domain superfamily//IPR001005:SANT/Myb domain//IPR017930:Myb domain
LOC111372342	337.287	1.92257	3.79098	0.208498	9.22103	2.94e-20	2.58e-19	XP_022850402.1	cytochrome_P450_97B2,_chloroplastic,_transcript_variant_X2	Olive	PF00067:Cytochrome_P450	IPR033890:GDP-mannose 3,5-epimerase//IPR036291:NAD(P)-binding domain superfamily
LOC111400866	418.491	1.91798	3.77893	0.164451	11.6629	1.97e-31	2.76e-30	XP_022884075.1	WAT1-related_protein_At5g40240-like	Olive	PF00892:EamA-like_transporter_family
LOC111371802	794.884	1.91772	3.77827	0.144849	13.2395	5.19e-40	9.46e-39	XP_022849736.1	probable_1-deoxy-D-xylulose-5-phosphate_synthase,_chloroplastic,_transcript_variant_X2	Olive	PF02780:Transketolase,_C-terminal_domain	IPR036397:Ribonuclease H superfamily//IPR012337:Ribonuclease H-like superfamily
LOC111408113	313.82	1.91474	3.77046	0.18363	10.4272	1.86e-25	2.07e-24	XP_022893673.1	mucin-5AC-like,_transcript_variant_X2	Olive		IPR000823:Plant peroxidase//IPR002016:Haem peroxidase//IPR010255:Haem peroxidase superfamily
LOC111379435	674.204	1.91404	3.76862	0.172067	11.1238	9.61e-29	1.22e-27	XP_022858564.1	dihydroxy-acid_dehydratase,_chloroplastic	Olive	PF00920:Dehydratase_family	IPR008266:Tyrosine-protein kinase, active site//IPR000719:Protein kinase domain//IPR011009:Protein kinase-like domain superfamily
LOC111381845	208.788	1.91165	3.76238	0.223747	8.54378	1.3e-17	1.01e-16	XP_022861457.1	aldehyde_dehydrogenase-like	Olive	PF00171:Aldehyde_dehydrogenase_family
LOC111409921	2683.51	1.90758	3.75178	0.106628	17.8901	1.41e-71	5.31e-70	XP_022895802.1	aspartyl_protease_family_protein_2-like	Olive	PF14543:Xylanase_inhibitor_N-terminal//PF14541:Xylanase_inhibitor_C-terminal	IPR001881:EGF-like calcium-binding domain//IPR018097:EGF-like calcium-binding, conserved site//IPR036249:Thioredoxin-like superfamily
LOC111372328	236.708	1.90694	3.75013	0.202468	9.41849	4.58e-21	4.17e-20	XP_022850386.1	uncharacterized_GPI-anchored_protein_At4g28100-like	Olive
LOC111406223	783.183	1.89391	3.71642	0.142018	13.3357	1.43e-40	2.66e-39	XP_022891272.1	photosynthetic_NDH_subunit_of_lumenal_location_5,_chloroplastic	Olive	PF00160:Cyclophilin_type_peptidyl-prolyl_cis-trans_isomerase/CLD	IPR036259:MFS transporter superfamily
LOC111396621	183.338	1.89216	3.7119	0.222493	8.50433	1.83e-17	1.4e-16	XP_022878807.1	mitogen-activated_protein_kinase_kinase_kinase_NPK1-like,_transcript_variant_X2	Olive	PF00069:Protein_kinase_domain
LOC111369336	362.858	1.88996	3.70626	0.182373	10.3631	3.65e-25	3.98e-24	XP_022846581.1	zinc_finger_protein_GIS3-like	Olive
LOC111377287	93.1036	1.88813	3.70154	0.354975	5.31904	1.04e-07	4.05e-07	XP_022856132.1	TORTIFOLIA1-like_protein_4	Olive	PF13513:HEAT-like_repeat	IPR009604:LsmAD domain
LOC111366763	1241.45	1.87759	3.6746	0.121807	15.4144	1.31e-53	3.46e-52		pollen_allergen_Che_a_1-like	Olive		IPR006447:Myb domain, plants//IPR009057:Homeobox-like domain superfamily//IPR017930:Myb domain
LOC111372286	3639.63	1.86993	3.65516	0.107089	17.4616	2.81e-68	9.99e-67	XP_022850312.1	glucan_endo-1,3-beta-glucosidase_12-like	Olive	PF07983:X8_domain//PF00332:Glycosyl_hydrolases_family_17	IPR037151:Alpha-ketoglutarate-dependent dioxygenase AlkB-like superfamily
LOC111396063	27690.1	1.86796	3.65017	0.115725	16.1414	1.3e-58	3.9e-57	XP_022878101.1	S-adenosylmethionine_synthase_1,_transcript_variant_X2	Olive	PF02773:S-adenosylmethionine_synthetase,_C-terminal_domain//PF00438:S-adenosylmethionine_synthetase,_N-terminal_domain//PF02772:S-adenosylmethionine_synthetase,_central_domain	IPR003616:Post-SET domain//IPR001214:SET domain//IPR025787:Histone-lysine N-methyltransferase, SET2, plant
LOC111409053	2008.28	1.86744	3.64885	0.14403	12.9657	1.92e-38	3.32e-37	XP_022894718.1	O-fucosyltransferase_31-like	Olive	PF10250:GDP-fucose_protein_O-fucosyltransferase	IPR008979:Galactose-binding-like domain superfamily
LOC111377911	206.89	1.86674	3.64708	0.225558	8.2761	1.27e-16	9.33e-16	XP_022856832.1	F-box_protein_At5g51370-like	Olive
LOC111395997	4792.96	1.86279	3.6371	0.14461	12.8814	5.73e-38	9.77e-37	XP_022878014.1	beta-glucosidase_46-like,_transcript_variant_X2	Olive	PF00232:Glycosyl_hydrolase_family_1	IPR001841:Zinc finger, RING-type//IPR013083:Zinc finger, RING/FYVE/PHD-type//IPR017907:Zinc finger, RING-type, conserved site
LOC111376246	139.188	1.86212	3.63542	0.278877	6.67721	2.44e-11	1.28e-10	XP_022854966.1	leucine_aminopeptidase_2,_chloroplastic-like	Olive	PF00883:Cytosol_aminopeptidase_family,_catalytic_domain	IPR036291:NAD(P)-binding domain superfamily
LOC111408868	344.634	1.85882	3.62711	0.221556	8.38985	4.87e-17	3.66e-16	XP_022894452.1	putative_HVA22-like_protein_g	Olive	PF03134:TB2/DP1,_HVA22_family	IPR036427:Bromodomain-like superfamily//IPR001487:Bromodomain//IPR038336:NET domain superfamily//IPR027353:NET domain
LOC111398970	172.921	1.85482	3.61707	0.228058	8.13313	4.18e-16	2.98e-15	XP_022881921.1	aspartyl_protease_family_protein_2-like	Olive	PF14543:Xylanase_inhibitor_N-terminal//PF14541:Xylanase_inhibitor_C-terminal
LOC111383862	1953.97	1.84852	3.60131	0.114012	16.2134	4.06e-59	1.23e-57	XP_022863814.1	photosystem_II_5_kDa_protein,_chloroplastic-like	Olive
LOC111379856	964.951	1.84795	3.59989	0.134991	13.6895	1.17e-42	2.32e-41			Olive
LOC111410515	344.114	1.84705	3.59763	0.187611	9.84506	7.2e-23	7.16e-22	XP_022896657.1	dirigent_protein_21-like	Olive	PF03018:Dirigent-like_protein
LOC111368103	1024.44	1.8464	3.59602	0.130335	14.1666	1.47e-45	3.18e-44	XP_022845078.1	uncharacterized_LOC111368103,_transcript_variant_X3	Olive		IPR003165:Piwi domain//IPR036397:Ribonuclease H superfamily//IPR012337:Ribonuclease H-like superfamily
LOC111398388	96.0285	1.84638	3.59596	0.29515	6.25572	3.96e-10	1.9e-09	XP_022881068.1	kirola-like	Olive	PF00407:Pathogenesis-related_protein_Bet_v_I_family	IPR013083:Zinc finger, RING/FYVE/PHD-type//IPR007527:Zinc finger, SWIM-type
LOC111399287	96.0285	1.84638	3.59596	0.29515	6.25572	3.96e-10	1.9e-09			Olive		IPR014772:Mammalian uncoordinated homology 13, domain 2//IPR014770:Munc13 homology 1
LOC111366482	55.2902	1.84637	3.59593	0.402571	4.58643	4.51e-06	1.46e-05	XP_022842999.1	ribonucleoside-diphosphate_reductase_large_subunit-like	Olive	PF02867:Ribonucleotide_reductase,_barrel_domain	IPR027417:P-loop containing nucleoside triphosphate hydrolase
LOC111395914	58.7545	1.84124	3.58317	0.482821	3.8135	0.000137013	0.000366142	XP_022877903.1	uncharacterized_LOC111395914	Olive	PF01190:Pollen_proteins_Ole_e_I_like
LOC111386804	240.885	1.84123	3.58314	0.224588	8.19824	2.44e-16	1.76e-15	XP_022867048.1	enolase_1,_chloroplastic-like	Olive	PF03952:Enolase,_N-terminal_domain	IPR029044:Nucleotide-diphospho-sugar transferases
LOC111387899	749.697	1.84039	3.58106	0.194621	9.45625	3.19e-21	2.93e-20	XP_022868275.1	fruit_protein_pKIWI501-like	Olive
LOC111369905	3402.91	1.83993	3.57992	0.140314	13.1129	2.78e-39	4.96e-38	XP_022847385.1	callose_synthase_3-like,_transcript_variant_X2	Olive	PF02364:1,3-beta-glucan_synthase_component//PF14288:1,3-beta-glucan_synthase_subunit_FKS1,_domain-1//PF04652:Vta1_like
LOC111405107	60.5382	1.83594	3.57004	0.42309	4.33937	1.43e-05	4.35e-05	XP_022889600.1	protein_IQ-DOMAIN_1-like,_transcript_variant_X2	Olive	PF00612:IQ_calmodulin-binding_motif	IPR036875:Zinc finger, CCHC-type superfamily
LOC111391008	380.462	1.83519	3.5682	0.171285	10.7143	8.73e-27	1.02e-25	XP_022871911.1	LRR_receptor-like_serine/threonine-protein_kinase_FEI_1	Olive	PF08263:Leucine_rich_repeat_N-terminal_domain//PF00069:Protein_kinase_domain
LOC111383997	772.098	1.83506	3.56787	0.157041	11.6853	1.52e-31	2.12e-30	XP_022863964.1	ethylene-responsive_transcription_factor_WIN1-like	Olive	PF00847:AP2_domain	IPR011009:Protein kinase-like domain superfamily
LOC111405792	166.188	1.83435	3.56611	0.230856	7.94588	1.93e-15	1.32e-14	XP_022890602.1	carboxylesterase_1-like	Olive	PF07859:alpha/beta_hydrolase_fold	IPR000719:Protein kinase domain//IPR011009:Protein kinase-like domain superfamily
LOC111396273	515.936	1.83331	3.56353	0.194396	9.43079	4.07e-21	3.72e-20	XP_022878425.1	aspartic_proteinase_NANA,_chloroplast-like	Olive	PF14541:Xylanase_inhibitor_C-terminal//PF14543:Xylanase_inhibitor_N-terminal
LOC111387106	203.078	1.83175	3.55968	0.213082	8.59644	8.22e-18	6.42e-17	XP_022867393.1	cyclin-A1-4-like	Olive	PF02984:Cyclin,_C-terminal_domain//PF00134:Cyclin,_N-terminal_domain	IPR029058:Alpha/Beta hydrolase fold//IPR016024:Armadillo-type fold//IPR011989:Armadillo-like helical
LOC111398387	103.027	1.8313	3.55857	0.284734	6.43161	1.26e-10	6.32e-10	XP_022881067.1	kirola-like	Olive	PF00407:Pathogenesis-related_protein_Bet_v_I_family	IPR011598:Myc-type, basic helix-loop-helix (bHLH) domain//IPR036638:Helix-loop-helix DNA-binding domain superfamily
LOC111389772	55.1841	1.82552	3.54435	0.38517	4.73952	2.14e-06	7.25e-06	XP_022870504.1	SNARE-interacting_protein_KEULE-like	Olive		IPR027417:P-loop containing nucleoside triphosphate hydrolase//IPR001752:Kinesin motor domain//IPR019821:Kinesin motor domain, conserved site//IPR036961:Kinesin motor domain superfamily
LOC111401523	593.304	1.82437	3.54152	0.19299	9.45319	3.29e-21	3.02e-20	XP_022885063.1	probable_inactive_leucine-rich_repeat_receptor-like_protein_kinase_At3g03770	Olive	PF07714:Protein_tyrosine_kinase//PF13855:Leucine_rich_repeat
LOC111405559	284.32	1.82293	3.538	0.209784	8.68956	3.64e-18	2.88e-17	XP_022890273.1	BAG_family_molecular_chaperone_regulator_7-like	Olive	PF02179:BAG_domain	IPR004827:Basic-leucine zipper domain
LOC111396640	517.085	1.82226	3.53634	0.194386	9.3744	6.96e-21	6.27e-20	XP_022878842.1	probable_aldo-keto_reductase_3,_transcript_variant_X2	Olive	PF00248:Aldo/keto_reductase_family
LOC111384085	3066.89	1.82186	3.53536	0.173259	10.5152	7.35e-26	8.26e-25	XP_022864076.1	phospho-2-dehydro-3-deoxyheptonate_aldolase_1,_chloroplastic-like	Olive	PF01474:Class-II_DAHP_synthetase_family	IPR011263:DNA-directed RNA polymerase, RpoA/D/Rpb3-type//IPR036643:DNA-directed RNA polymerase, insert domain superfamily//IPR001514:DNA-directed RNA polymerase, 30-40kDa subunit, conserved site//IPR036603:RNA polymerase, RBP11-like subunit
LOC111381297	434.915	1.82172	3.53501	0.187505	9.71558	2.59e-22	2.51e-21	XP_022860837.1	cyclin-dependent_kinase_B1-1	Olive	PF00069:Protein_kinase_domain
LOC111369449	231.09	1.81679	3.52296	0.213196	8.52168	1.57e-17	1.21e-16	XP_022846735.1	uncharacterized_LOC111369449,_transcript_variant_X2	Olive	PF03031:NLI_interacting_factor-like_phosphatase	IPR029000:Cyclophilin-like domain superfamily//IPR024936:Cyclophilin-type peptidyl-prolyl cis-trans isomerase//IPR020892:Cyclophilin-type peptidyl-prolyl cis-trans isomerase, conserved site//IPR002130:Cyclophilin-type peptidyl-prolyl cis-trans isomerase domain
LOC111410893	92.3948	1.81571	3.52032	0.307679	5.90131	3.61e-09	1.61e-08	XP_022897255.1	uncharacterized_LOC111410893	Olive		IPR018146:Glyoxalase I, conserved site//IPR037523:Vicinal oxygen chelate (VOC) domain//IPR029068:Glyoxalase/Bleomycin resistance protein/Dihydroxybiphenyl dioxygenase//IPR004361:Glyoxalase I
LOC111367183	708.945	1.81414	3.5165	0.140705	12.8932	4.92e-38	8.41e-37	XP_022843699.1	uncharacterized_LOC111367183	Olive	PF06075:Plant_protein_of_unknown_function_(DUF936)
LOC111397557	352.788	1.81357	3.51511	0.167761	10.8104	3.07e-27	3.65e-26	XP_022880316.1	rop_guanine_nucleotide_exchange_factor_1-like	Olive	PF03759:PRONE_(Plant-specific_Rop_nucleotide_exchanger)	IPR003340:B3 DNA binding domain//IPR000270:PB1 domain//IPR015300:DNA-binding pseudobarrel domain superfamily
LOC111401775	52.6353	1.81253	3.51257	0.390445	4.64221	3.45e-06	1.13e-05	XP_022885435.1	uncharacterized_LOC111401775,_transcript_variant_X4	Olive		IPR000719:Protein kinase domain//IPR002902:Gnk2-homologous domain//IPR008271:Serine/threonine-protein kinase, active site//IPR011009:Protein kinase-like domain superfamily//IPR017441:Protein kinase, ATP binding site//IPR038408:Gnk2-homologous domain superfamily
LOC111369451	116.013	1.81062	3.50793	0.273333	6.62423	3.49e-11	1.82e-10	XP_022846741.1	homeobox-leucine_zipper_protein_HAT14-like	Olive	PF02183:Homeobox_associated_leucine_zipper//PF00046:Homeodomain	IPR036390:Winged helix DNA-binding domain superfamily//IPR016689:ESCRT-2 complex, Snf8//IPR036388:Winged helix-like DNA-binding domain superfamily
LOC111402524	958.995	1.80769	3.50081	0.150449	12.0153	2.95e-33	4.38e-32	XP_022886667.1	choline_transporter_protein_1,_transcript_variant_X3	Olive	PF04515:Plasma-membrane_choline_transporter	IPR000058:Zinc finger, AN1-type//IPR035896:AN1-like Zinc finger//IPR002653:Zinc finger, A20-type
LOC111392544	312.545	1.80484	3.49391	0.185628	9.72288	2.41e-22	2.34e-21	XP_022873677.1	pyruvate_decarboxylase_1	Olive	PF00205:Thiamine_pyrophosphate_enzyme,_central_domain//PF02776:Thiamine_pyrophosphate_enzyme,_N-terminal_TPP_binding_domain//PF02775:Thiamine_pyrophosphate_enzyme,_C-terminal_TPP_binding_domain	IPR036249:Thioredoxin-like superfamily//IPR014025:Glutaredoxin subgroup//IPR002109:Glutaredoxin
LOC111408391	368.291	1.80421	3.49238	0.179493	10.0517	9.03e-24	9.31e-23	XP_022893935.1	uncharacterized_LOC111408391,_transcript_variant_X3	Olive		IPR011016:Zinc finger, RING-CH-type//IPR013083:Zinc finger, RING/FYVE/PHD-type
LOC111389633	122.767	1.80256	3.48839	0.275344	6.54658	5.89e-11	3.02e-10	XP_022870333.1	squamosa_promoter-binding-like_protein_8	Olive	PF03110:SBP_domain
LOC111380503	99.9292	1.80034	3.48303	0.327628	5.49507	3.91e-08	1.58e-07	XP_022859856.1	probable_receptor-like_serine/threonine-protein_kinase_At4g34500	Olive	PF00069:Protein_kinase_domain
LOC111376918	84.4768	1.79935	3.48064	0.342679	5.25085	1.51e-07	5.78e-07	XP_022855698.1	ribose-phosphate_pyrophosphokinase_1-like	Olive
LOC111382411	476.567	1.79884	3.47941	0.169549	10.6096	2.69e-26	3.08e-25	XP_022862150.1	protein_DETOXIFICATION_29-like	Olive	PF01554:MatE
LOC111406016	214.459	1.78684	3.45059	0.212802	8.39675	4.59e-17	3.46e-16	XP_022890949.1	mucin-5AC-like,_transcript_variant_X2	Olive		IPR007528:RINT-1/Tip20
LOC111378602	79.3115	1.78523	3.44673	0.381577	4.67855	2.89e-06	9.59e-06	XP_022857600.1	glycine-rich_protein_5-like	Olive		IPR034964:Lumazine synthase//IPR036467:Lumazine/riboflavin synthase superfamily
LOC111370737	1096.88	1.78467	3.44539	0.135745	13.1472	1.77e-39	3.17e-38	XP_022848358.1	trihelix_transcription_factor_PTL-like	Olive	PF13837:Myb/SANT-like_DNA-binding_domain
LOC111402231	262.083	1.78067	3.43585	0.196914	9.04286	1.53e-19	1.3e-18	XP_022886163.1	transcription_factor_TCP2-like	Olive	PF03634:TCP_family_transcription_factor
LOC111403788	613.093	1.77716	3.42751	0.153415	11.584	4.97e-31	6.8e-30	XP_022888179.1	cellulose_synthase_A_catalytic_subunit_7_[UDP-forming],_transcript_variant_X2	Olive	PF03552:Cellulose_synthase//PF14569:Zinc-binding_RING-finger	IPR016024:Armadillo-type fold//IPR001313:Pumilio RNA-binding repeat//IPR033712:Pumilio, RNA binding domain//IPR011989:Armadillo-like helical//IPR033133:Pumilio homology domain
LOC111373313	481.238	1.7754	3.42333	0.186534	9.51781	1.77e-21	1.64e-20	XP_022851592.1	serine_carboxypeptidase-like_45	Olive	PF00450:Serine_carboxypeptidase
LOC111380706	125.608	1.77445	3.42108	0.277475	6.395	1.61e-10	7.98e-10	XP_022860108.1	formin-like_protein_6	Olive	PF02181:Formin_Homology_2_Domain	IPR001841:Zinc finger, RING-type//IPR013083:Zinc finger, RING/FYVE/PHD-type
LOC111410244	155.105	1.77212	3.41555	0.246011	7.2034	5.87e-13	3.46e-12	XP_022896276.1	uridine_5'-monophosphate_synthase-like	Olive	PF00156:Phosphoribosyl_transferase_domain//PF00215:Orotidine_5'-phosphate_decarboxylase_/_HUMPS_family
LOC111377527	691.387	1.77155	3.41419	0.151531	11.691	1.42e-31	1.99e-30	XP_022856422.1	primary_amine_oxidase-like,_transcript_variant_X2	Olive	PF02727:Copper_amine_oxidase,_N2_domain//PF02728:Copper_amine_oxidase,_N3_domain//PF01179:Copper_amine_oxidase,_enzyme_domain	IPR036236:Zinc finger C2H2 superfamily//IPR013087:Zinc finger C2H2-type
LOC111405558	145.81	1.76997	3.41047	0.252619	7.00649	2.44e-12	1.38e-11			Olive		IPR011990:Tetratricopeptide-like helical domain superfamily//IPR002885:Pentatricopeptide repeat
LOC111368800	1291.5	1.76676	3.40289	0.122584	14.4127	4.3e-47	9.7e-46	XP_022846026.1	glucan_endo-1,3-beta-glucosidase_14-like	Olive	PF00332:Glycosyl_hydrolases_family_17//PF07983:X8_domain	IPR029044:Nucleotide-diphospho-sugar transferases
LOC111368890	431.259	1.76384	3.39602	0.168639	10.4593	1.33e-25	1.48e-24	XP_022846164.1	WD_repeat-containing_protein_87-like,_transcript_variant_X5	Olive
LOC111407207	199.751	1.76134	3.39014	0.242071	7.27615	3.43e-13	2.05e-12	XP_022892316.1	2-dehydro-3-deoxyphosphooctonate_aldolase_1,_transcript_variant_X4	Olive	PF00793:DAHP_synthetase_I_family
LOC111412040	341.088	1.7585	3.38346	0.169376	10.3822	2.99e-25	3.27e-24	XP_022898545.1	expansin-B3-like	Olive	PF03330:Lytic_transglycolase//PF01357:Pollen_allergen	IPR000008:C2 domain//IPR035892:C2 domain superfamily
LOC111369734	238.142	1.75618	3.37802	0.22137	7.93321	2.14e-15	1.46e-14	XP_022847136.1	40S_ribosomal_protein_S4-like,_transcript_variant_X2	Olive	PF08071:RS4NT_(NUC023)_domain//PF00467:KOW_motif//PF00900:Ribosomal_family_S4e//PF16121:40S_ribosomal_protein_S4_C-terminus//PF01479:S4_domain	IPR036514:SGNH hydrolase superfamily
LOC111398866	1407.66	1.7559	3.37736	0.489739	3.58537	0.0003366	0.000849736	XP_022881775.1	glyceraldehyde-3-phosphate_dehydrogenase,_cytosolic-like	Olive	PF00044:Glyceraldehyde_3-phosphate_dehydrogenase,_NAD_binding_domain//PF02800:Glyceraldehyde_3-phosphate_dehydrogenase,_C-terminal_domain	IPR002885:Pentatricopeptide repeat//IPR011990:Tetratricopeptide-like helical domain superfamily
LOC111398618	359.613	1.75487	3.37495	0.213786	8.20853	2.24e-16	1.62e-15	XP_022881380.1	cyclin-B2-4-like,_transcript_variant_X4	Olive	PF00134:Cyclin,_N-terminal_domain
LOC111393926	251.903	1.7545	3.37409	0.191796	9.14773	5.81e-20	5.04e-19	XP_022875477.1	protein_WVD2-like_5,_transcript_variant_X2	Olive	PF06886:Targeting_protein_for_Xklp2_(TPX2)	IPR036758:At5g01610-like superfamily
LOC111383037	161.075	1.75401	3.37295	0.230939	7.59514	3.07e-14	1.96e-13	XP_022862862.1	homeobox_protein_BEL1_homolog	Olive	PF05920:Homeobox_KN_domain//PF07526:Associated_with_HOX	IPR036112:(2R)-phospho-3-sulpholactate synthase, ComA superfamily//IPR013785:Aldolase-type TIM barrel
LOC111408428	421.41	1.75133	3.36669	0.192622	9.09204	9.72e-20	8.36e-19	XP_022893959.1	ATP-dependent_DNA_helicase_DDM1	Olive	PF00271:Helicase_conserved_C-terminal_domain//PF00176:SNF2_family_N-terminal_domain	IPR013083:Zinc finger, RING/FYVE/PHD-type//IPR029044:Nucleotide-diphospho-sugar transferases//IPR001841:Zinc finger, RING-type
LOC111372819	215.907	1.75044	3.36462	0.227666	7.68866	1.49e-14	9.7e-14	XP_022850997.1	GATA_transcription_factor_11-like,_transcript_variant_X2	Olive	PF00320:GATA_zinc_finger	IPR000719:Protein kinase domain//IPR008271:Serine/threonine-protein kinase, active site//IPR000270:PB1 domain//IPR017441:Protein kinase, ATP binding site//IPR011009:Protein kinase-like domain superfamily//IPR001245:Serine-threonine/tyrosine-protein kinase, catalytic domain
LOC111410469	169.213	1.75041	3.36453	0.226063	7.74299	9.71e-15	6.4e-14	XP_022896593.1	zinc_finger_CCCH_domain-containing_protein_53-like,_transcript_variant_X6	Olive	PF00076:RNA_recognition_motif._(a.k.a._RRM,_RBD,_or_RNP_domain)//PF00642:Zinc_finger_C-x8-C-x5-C-x3-H_type_(and_similar)	IPR036020:WW domain superfamily//IPR001202:WW domain
LOC111387876	515.98	1.75025	3.36417	0.155613	11.2474	2.38e-29	3.09e-28	XP_022868242.1	protein_TIC_21,_chloroplastic-like	Olive	PF12263:Protein_of_unknown_function_(DUF3611)	IPR020683:Ankyrin repeat-containing domain//IPR002110:Ankyrin repeat//IPR036770:Ankyrin repeat-containing domain superfamily
LOC111402500	622.837	1.74909	3.36145	0.196929	8.88179	6.58e-19	5.41e-18	XP_022886629.1	chloroplastic_lipocalin	Olive	PF08212:Lipocalin-like_domain
LOC111376634	167.636	1.74747	3.35768	0.232375	7.52004	5.48e-14	3.43e-13	XP_022855372.1	PLASMODESMATA_CALLOSE-BINDING_PROTEIN_2-like,_transcript_variant_X2	Olive	PF07983:X8_domain
LOC111365282	855.924	1.74139	3.34357	0.133365	13.0573	5.77e-39	1.02e-37	XP_022841496.1	probable_inactive_receptor_kinase_At1g48480	Olive	PF08263:Leucine_rich_repeat_N-terminal_domain//PF13855:Leucine_rich_repeat//PF00069:Protein_kinase_domain
LOC111366985	103.89	1.74088	3.34239	0.285223	6.10358	1.04e-09	4.84e-09	XP_022843429.1	uncharacterized_LOC111366985	Olive		IPR029071:Ubiquitin-like domain superfamily
LOC111395461	536.1	1.74032	3.34109	0.151247	11.5064	1.22e-30	1.65e-29	XP_022877231.1	protein_E6-like	Olive		IPR007527:Zinc finger, SWIM-type//IPR006564:Zinc finger, PMZ-type
LOC111375646	128.858	1.74024	3.3409	0.301828	5.76565	8.13e-09	3.52e-08	XP_022854271.1	probable_E3_ubiquitin-protein_ligase_LUL4,_transcript_variant_X2	Olive	PF13920:Zinc_finger,_C3HC4_type_(RING_finger)
LOC111396744	1204.96	1.74022	3.34086	0.572092	3.04185	0.0023513	0.00518467	XP_022879008.1	pyrophosphate--fructose_6-phosphate_1-phosphotransferase_subunit_alpha	Olive	PF00365:Phosphofructokinase	IPR002913:START domain
LOC111385339	65.674	1.73986	3.34003	0.368482	4.72169	2.34e-06	7.88e-06	XP_022865493.1	protein_YLS3-like	Olive	PF14368:Probable_lipid_transfer	IPR001841:Zinc finger, RING-type//IPR013083:Zinc finger, RING/FYVE/PHD-type
LOC111412049	1951.05	1.73501	3.32881	0.11014	15.7528	6.57e-56	1.83e-54	XP_022898554.1	fasciclin-like_arabinogalactan_protein_7,_transcript_variant_X2	Olive	PF02469:Fasciclin_domain	IPR001810:F-box domain//IPR036047:F-box-like domain superfamily//IPR006553:Leucine-rich repeat, cysteine-containing subtype
LOC111412157	306.914	1.73498	3.32875	0.249793	6.94566	3.77e-12	2.1e-11	XP_022898714.1	cellulose_synthase_A_catalytic_subunit_8_[UDP-forming]	Olive	PF14569:Zinc-binding_RING-finger//PF03552:Cellulose_synthase	IPR000850:Adenylate kinase/UMP-CMP kinase//IPR027417:P-loop containing nucleoside triphosphate hydrolase//IPR033690:Adenylate kinase, conserved site
LOC111365322	911.166	1.73471	3.32812	0.133641	12.9804	1.58e-38	2.74e-37		uncharacterized_LOC111365322,_transcript_variant_X4	Olive		IPR001471:AP2/ERF domain//IPR016177:DNA-binding domain superfamily//IPR036955:AP2/ERF domain superfamily
LOC111373399	90.0288	1.72949	3.31611	0.310078	5.5776	2.44e-08	1.01e-07	XP_022851700.1	protein_WVD2-like_3	Olive	PF06886:Targeting_protein_for_Xklp2_(TPX2)	IPR027417:P-loop containing nucleoside triphosphate hydrolase
LOC111405326	1075.43	1.72754	3.31163	0.153164	11.2791	1.66e-29	2.17e-28	XP_022889921.1	heavy_metal-associated_isoprenylated_plant_protein_7-like	Olive	PF00403:Heavy-metal-associated_domain
LOC111374486	50.28	1.72006	3.29449	0.453257	3.79488	0.000147715	0.000393114		uncharacterized_LOC111374486	Olive		IPR006458:Ovate protein family, C-terminal
LOC111374811	87.7072	1.7179	3.28957	0.338561	5.07413	3.89e-07	1.43e-06	XP_022853315.1	heat_stress_transcription_factor_C-1-like	Olive	PF00447:HSF-type_DNA-binding	IPR036938:Phosphatidic acid phosphatase type 2/haloperoxidase superfamily
LOC111410298	181.189	1.71744	3.28853	0.264082	6.50346	7.85e-11	3.99e-10	XP_022896328.1	uncharacterized_LOC111410298	Olive	PF00226:DnaJ_domain	IPR017441:Protein kinase, ATP binding site//IPR011009:Protein kinase-like domain superfamily//IPR003609:PAN/Apple domain//IPR008271:Serine/threonine-protein kinase, active site//IPR001480:Bulb-type lectin domain//IPR036426:Bulb-type lectin domain superfamily//IPR000719:Protein kinase domain//IPR024171:S-receptor-like serine/threonine-protein kinase
LOC111406187	182.414	1.70998	3.27156	0.219909	7.77583	7.5e-15	4.97e-14	XP_022891208.1	pre-rRNA-processing_protein_ESF2-like,_transcript_variant_X2	Olive
LOC111410490	96.3942	1.69707	3.24242	0.290909	5.83367	5.42e-09	2.38e-08	XP_022896734.1	CRAL-TRIO_domain-containing_protein_C589.09,_mitochondrial-like,_transcript_variant_X2	Olive	PF00650:CRAL/TRIO_domain	IPR009060:UBA-like superfamily//IPR005176:Potentiating neddylation domain
LOC111395893	346.84	1.69448	3.2366	0.16709	10.1411	3.63e-24	3.81e-23	XP_022877875.1	WEB_family_protein_At2g38370-like	Olive	PF05701:Weak_chloroplast_movement_under_blue_light	IPR017853:Glycoside hydrolase superfamily
LOC111396393	1167.27	1.69411	3.23578	0.132204	12.8144	1.36e-37	2.29e-36	XP_022878599.1	transcription_factor_MYC4-like	Olive	PF14215:bHLH-MYC_and_R2R3-MYB_transcription_factors_N-terminal//PF00010:Helix-loop-helix_DNA-binding_domain	IPR001764:Glycoside hydrolase, family 3, N-terminal//IPR036881:Glycoside hydrolase family 3 C-terminal domain superfamily//IPR017853:Glycoside hydrolase superfamily//IPR036962:Glycoside hydrolase, family 3, N-terminal domain superfamily
LOC111369569	849.096	1.69382	3.23513	0.151347	11.1916	4.48e-29	5.74e-28	XP_022846907.1	F-box_protein_FBW2-like	Olive
LOC111396809	177.172	1.6916	3.23015	0.225363	7.5061	6.09e-14	3.81e-13	XP_022879100.1	probable_rhamnogalacturonate_lyase_B,_transcript_variant_X2	Olive	PF14686:Polysaccharide_lyase_family_4,_domain_II//PF06045:Rhamnogalacturonate_lyase_family//PF14683:Polysaccharide_lyase_family_4,_domain_III	IPR036093:NAC domain superfamily//IPR003441:NAC domain
LOC111389217	287.835	1.69115	3.22914	0.283277	5.96996	2.37e-09	1.08e-08	XP_022869876.1	cell_division_control_protein_2_homolog_D	Olive	PF00069:Protein_kinase_domain
LOC111377583	778.433	1.68826	3.22268	0.129755	13.0111	1.06e-38	1.85e-37	XP_022856484.1	probable_protein_S-acyltransferase_22	Olive	PF01529:DHHC_palmitoyltransferase
LOC111405891	56.1375	1.68758	3.22116	0.379167	4.45076	8.56e-06	2.68e-05	XP_022890753.1	uncharacterized_LOC111405891	Olive		IPR029017:Enolase-like, N-terminal//IPR029061:Thiamin diphosphate-binding fold//IPR004433:2-succinyl-5-enolpyruvyl-6-hydroxy-3-cyclohexene-1-carboxylic-acid synthase//IPR036849:Enolase-like, C-terminal domain superfamily//IPR029058:Alpha/Beta hydrolase fold//IPR018110:Mandelate racemase/muconate lactonizing enzyme, conserved site//IPR013342:Mandelate racemase/muconate lactonizing enzyme, C-termin…
LOC111408037	97.6306	1.68281	3.21052	0.304355	5.5291	3.22e-08	1.32e-07	XP_022893556.1	kelch-like_protein_2,_transcript_variant_X3	Olive	PF10539:Development_and_cell_death_domain//PF01344:Kelch_motif	IPR001356:Homeobox domain//IPR017970:Homeobox, conserved site//IPR003106:Leucine zipper, homeobox-associated//IPR009057:Homeobox-like domain superfamily
LOC111388038	554.683	1.68059	3.20559	0.143759	11.6903	1.43e-31	2.01e-30		sucrose_synthase-like	Olive		IPR004367:Cyclin, C-terminal domain//IPR013763:Cyclin-like//IPR036915:Cyclin-like superfamily
LOC111376470	580.004	1.67495	3.19309	0.177525	9.43502	3.91e-21	3.57e-20	XP_022855198.1	chaperone_protein_dnaJ_11,_chloroplastic-like	Olive	PF00226:DnaJ_domain	IPR036005:Creatinase/aminopeptidase-like//IPR002468:Peptidase M24A, methionine aminopeptidase, subfamily 2//IPR036388:Winged helix-like DNA-binding domain superfamily//IPR018349:Peptidase M24A, methionine aminopeptidase, subfamily 2, binding site//IPR036390:Winged helix DNA-binding domain superfamily//IPR001714:Peptidase M24, methionine aminopeptidase
LOC111407504	452.14	1.67462	3.19236	0.223503	7.49261	6.75e-14	4.2e-13	XP_022892786.1	O-fucosyltransferase_29-like,_transcript_variant_X2	Olive	PF10250:GDP-fucose_protein_O-fucosyltransferase	IPR030373:Polyamine biosynthesis domain, conserved site//IPR001045:Spermidine/spermine synthases//IPR030668:Spermidine/spermine synthase, eukaryotes//IPR029063:S-adenosyl-L-methionine-dependent methyltransferase//IPR030374:Polyamine biosynthesis domain//IPR037163:Spermidine synthase, tetramerisation domain superfamily
LOC111385254	50.3086	1.67328	3.18939	0.400999	4.17279	3.01e-05	8.79e-05	XP_022865399.1	probable_lactoylglutathione_lyase,_chloroplastic	Olive	PF00903:Glyoxalase/Bleomycin_resistance_protein/Dioxygenase_superfamily	IPR018045:Sulphate anion transporter, conserved site
LOC111395955	561.194	1.67316	3.18912	0.153159	10.9243	8.82e-28	1.08e-26	XP_022877960.1	uncharacterized_GPI-anchored_protein_At1g61900-like,_transcript_variant_X4	Olive
LOC111411173	248.607	1.67225	3.18711	0.192999	8.66455	4.53e-18	3.58e-17	XP_022897498.1	telomerase_reverse_transcriptase	Olive	PF12009:Telomerase_ribonucleoprotein_complex_-_RNA_binding_domain	IPR034335:Prostaglandin E synthase 2, C-terminal//IPR036282:Glutathione S-transferase, C-terminal domain superfamily
LOC111373507	72.829	1.6701	3.18236	0.329878	5.06277	4.13e-07	1.51e-06			Olive		IPR001471:AP2/ERF domain//IPR016177:DNA-binding domain superfamily//IPR036955:AP2/ERF domain superfamily
LOC111371396	87.9362	1.66913	3.18023	0.317287	5.26063	1.44e-07	5.49e-07	XP_022849128.1	lysine--tRNA_ligase,_chloroplastic/mitochondrial-like,_transcript_variant_X4	Olive	PF00152:tRNA_synthetases_class_II_(D,_K_and_N)	IPR036390:Winged helix DNA-binding domain superfamily//IPR036388:Winged helix-like DNA-binding domain superfamily//IPR003316:E2F/DP family, winged-helix DNA-binding domain
LOC111398550	549.579	1.66834	3.17848	0.152677	10.9272	8.54e-28	1.04e-26	XP_022881280.1	cell_division_control_protein_2_homolog_C	Olive	PF00069:Protein_kinase_domain	IPR036249:Thioredoxin-like superfamily
LOC111393253	528.233	1.66639	3.1742	0.193312	8.62025	6.68e-18	5.23e-17	XP_022874461.1	cell_division_control_protein_2_homolog_D-like	Olive	PF00069:Protein_kinase_domain
LOC111382795	213.143	1.6645	3.17004	0.21963	7.57865	3.49e-14	2.22e-13	XP_022862602.1	methionyl-tRNA_formyltransferase,_transcript_variant_X5	Olive	PF00551:Formyl_transferase	IPR003613:U box domain//IPR011989:Armadillo-like helical//IPR013083:Zinc finger, RING/FYVE/PHD-type//IPR016024:Armadillo-type fold
LOC111381682	142.057	1.66201	3.16458	0.264086	6.29346	3.1e-10	1.51e-09		uncharacterized_protein_LOC111381682	Olive		IPR032675:Leucine-rich repeat domain superfamily//IPR000719:Protein kinase domain//IPR011009:Protein kinase-like domain superfamily//IPR017441:Protein kinase, ATP binding site//IPR008271:Serine/threonine-protein kinase, active site//IPR003591:Leucine-rich repeat, typical subtype
LOC111392384	80.215	1.66109	3.16255	0.318009	5.22339	1.76e-07	6.67e-07		uncharacterized_LOC111392384,_transcript_variant_X2	Olive		IPR017972:Cytochrome P450, conserved site//IPR001128:Cytochrome P450//IPR036396:Cytochrome P450 superfamily//IPR002401:Cytochrome P450, E-class, group I
LOC111382816	1826.46	1.66058	3.16143	0.134827	12.3163	7.4e-35	1.15e-33	XP_022862625.1	plastidic_glucose_transporter_4,_transcript_variant_X2	Olive	PF00083:Sugar_(and_other)_transporter	IPR002885:Pentatricopeptide repeat//IPR011990:Tetratricopeptide-like helical domain superfamily
LOC111391313	243.475	1.65843	3.15672	0.195438	8.48571	2.14e-17	1.64e-16			Olive		IPR001251:CRAL-TRIO lipid binding domain//IPR036865:CRAL-TRIO lipid binding domain superfamily
LOC111380714	177.498	1.65724	3.15412	0.238264	6.95546	3.51e-12	1.97e-11	XP_022860117.1	cyclin-D5-1-like	Olive	PF00134:Cyclin,_N-terminal_domain//PF02984:Cyclin,_C-terminal_domain	IPR012946:X8 domain//IPR017853:Glycoside hydrolase superfamily//IPR000490:Glycoside hydrolase family 17
LOC111397049	375.337	1.65375	3.14651	0.187168	8.83564	9.95e-19	8.12e-18	XP_022879510.1	filament-like_plant_protein_3,_transcript_variant_X4	Olive	PF09730:Microtubule-associated_protein_Bicaudal-D//PF05911:Filament-like_plant_protein,_long_coiled-coil	IPR001849:Pleckstrin homology domain//IPR011993:PH-like domain superfamily
LOC111367877	293.926	1.65156	3.14173	0.184535	8.94985	3.56e-19	2.97e-18	XP_022844731.1	probable_inactive_receptor_kinase_At5g67200	Olive	PF13855:Leucine_rich_repeat//PF00069:Protein_kinase_domain	IPR032675:Leucine-rich repeat domain superfamily//IPR008808:Powdery mildew resistance protein, RPW8 domain//IPR027417:P-loop containing nucleoside triphosphate hydrolase
LOC111375114	131.556	1.64806	3.13412	0.347451	4.74329	2.1e-06	7.13e-06	XP_022853672.1	uncharacterized_LOC111375114,_transcript_variant_X2	Olive	PF14309:Domain_of_unknown_function_(DUF4378)	IPR036523:SurE-like phosphatase/nucleotidase superfamily//IPR002828:Survival protein SurE-like phosphatase/nucleotidase
LOC111404822	186.937	1.64112	3.11908	0.223672	7.33718	2.18e-13	1.32e-12	XP_022889339.1	uncharacterized_LOC111404822	Olive
LOC111365331	264.401	1.63809	3.11254	0.187153	8.75268	2.08e-18	1.67e-17	XP_022841563.1	putative_late_blight_resistance_protein_homolog_R1B-14,_transcript_variant_X4	Olive	PF00931:NB-ARC_domain	IPR008271:Serine/threonine-protein kinase, active site//IPR011009:Protein kinase-like domain superfamily//IPR000719:Protein kinase domain
LOC111384348	104.755	1.63712	3.11043	0.290565	5.63425	1.76e-08	7.38e-08	XP_022864387.1	calmodulin-like_protein_3	Olive	PF13499:EF-hand_domain_pair	IPR029063:S-adenosyl-L-methionine-dependent methyltransferase//IPR038375:Protein arginine methyltransferase NDUFAF7 superfamily
LOC111366166	14316.3	1.63397	3.10365	0.191603	8.52786	1.49e-17	1.15e-16	XP_022842628.1	apyrase-like	Olive	PF01150:GDA1/CD39_(nucleoside_phosphatase)_family	IPR018456:PTR2 family proton/oligopeptide symporter, conserved site//IPR036259:MFS transporter superfamily
LOC111380671	211.083	1.63306	3.1017	0.249964	6.53318	6.44e-11	3.3e-10	XP_022860069.1	uncharacterized_LOC111380671	Olive		IPR027417:P-loop containing nucleoside triphosphate hydrolase
LOC111368626	59.2012	1.63151	3.09838	0.381343	4.27834	1.88e-05	5.65e-05	XP_022845746.1	uncharacterized_LOC111368626,_transcript_variant_X2	Olive		IPR019787:Zinc finger, PHD-finger//IPR001965:Zinc finger, PHD-type//IPR011011:Zinc finger, FYVE/PHD-type//IPR019786:Zinc finger, PHD-type, conserved site//IPR013083:Zinc finger, RING/FYVE/PHD-type
LOC111395194	154.052	1.63101	3.09729	0.26427	6.17173	6.75e-10	3.19e-09	XP_022876972.1	uncharacterized_hydrolase_YugF,_transcript_variant_X3	Olive	PF12146:Serine_aminopeptidase,_S33
LOC111408777	92.7405	1.63076	3.09675	0.402526	4.05131	5.09e-05	0.000144703	XP_022894316.1	sphinganine_C4-monooxygenase_1-like	Olive	PF04116:Fatty_acid_hydroxylase_superfamily	IPR008271:Serine/threonine-protein kinase, active site//IPR017441:Protein kinase, ATP binding site//IPR011009:Protein kinase-like domain superfamily//IPR000719:Protein kinase domain
LOC111369786	161.025	1.62731	3.08937	0.25271	6.43944	1.2e-10	6.02e-10	XP_022847197.1	uncharacterized_LOC111369786	Olive
LOC111403765	187.674	1.62593	3.08642	0.214115	7.59372	3.11e-14	1.98e-13	XP_022888153.1	non-specific_lipid-transfer_protein-like	Olive	PF14368:Probable_lipid_transfer	IPR008949:Isoprenoid synthase domain superfamily//IPR036965:Terpene synthase, N-terminal domain superfamily//IPR008930:Terpenoid cyclases/protein prenyltransferase alpha-alpha toroid
LOC111369551	437.722	1.62565	3.08582	0.237875	6.83405	8.26e-12	4.5e-11	XP_022846888.1	protein_DETOXIFICATION_27-like	Olive	PF01554:MatE
LOC111409068	752.681	1.62517	3.0848	0.138809	11.708	1.16e-31	1.63e-30	XP_022894737.1	50S_ribosomal_protein_L29,_chloroplastic	Olive	PF00831:Ribosomal_L29_protein	IPR023494:Cytochrome c biogenesis protein Ccs1/CcsB
LOC111401833	152.779	1.62474	3.08387	0.328245	4.94978	7.43e-07	2.65e-06	XP_022885528.1	photosystem_I_reaction_center_subunit_psaK,_chloroplastic-like	Olive	PF01241:Photosystem_I_psaG_/_psaK	IPR029033:Histidine phosphatase superfamily//IPR013078:Histidine phosphatase superfamily, clade-1
LOC111388005	353.378	1.62248	3.07903	0.165751	9.78864	1.26e-22	1.24e-21	XP_022868430.1	transmembrane_protein_87A-like,_transcript_variant_X2	Olive	PF06814:Lung_seven_transmembrane_receptor
LOC111401525	51.974	1.62177	3.07752	0.476104	3.40633	0.000658424	0.00159008	XP_022885066.1	probable_inactive_leucine-rich_repeat_receptor-like_protein_kinase_At3g03770	Olive		IPR003851:Zinc finger, Dof-type
LOC111366095	404.777	1.62144	3.07683	0.161453	10.0428	9.88e-24	1.02e-22	XP_022842527.1	squamosa_promoter-binding-like_protein_7,_transcript_variant_X2	Olive	PF03110:SBP_domain
LOC111368729	315.749	1.61756	3.06857	0.176462	9.16662	4.88e-20	4.25e-19	XP_022845916.1	DAG_protein,_chloroplastic-like,_transcript_variant_X3	Olive
LOC111383760	233.108	1.61253	3.05787	0.314259	5.13121	2.88e-07	1.07e-06	XP_022863675.1	NADH--cytochrome_b5_reductase_1-like,_transcript_variant_X6	Olive	PF00175:Oxidoreductase_NAD-binding_domain//PF00970:Oxidoreductase_FAD-binding_domain	IPR004045:Glutathione S-transferase, N-terminal//IPR036249:Thioredoxin-like superfamily
LOC111393670	97.8561	1.60977	3.05202	0.304554	5.28566	1.25e-07	4.83e-07	XP_022875093.1	protein_NRT1/_PTR_FAMILY_2.6-like	Olive	PF00854:POT_family	IPR000592:Ribosomal protein S27e//IPR011332:Zinc-binding ribosomal protein
LOC111389283	188.336	1.60808	3.04846	0.220222	7.3021	2.83e-13	1.7e-12	XP_022869965.1	crocetin_glucosyltransferase,_chloroplastic-like	Olive	PF00201:UDP-glucoronosyl_and_UDP-glucosyl_transferase
LOC111368741	213.476	1.59954	3.03046	0.209313	7.64185	2.14e-14	1.38e-13	XP_022845926.1	4-hydroxy-tetrahydrodipicolinate_reductase_2,_chloroplastic-like	Olive	PF05173:Dihydrodipicolinate_reductase,_C-terminus//PF01113:Dihydrodipicolinate_reductase,_N-terminus	IPR031968:VASt domain//IPR000008:C2 domain//IPR004182:GRAM domain//IPR011993:PH-like domain superfamily//IPR035892:C2 domain superfamily
LOC111402374	580.893	1.596	3.02303	0.138845	11.4948	1.4e-30	1.89e-29	XP_022886383.1	probable_protein_phosphatase_2C_66,_transcript_variant_X2	Olive	PF00481:Protein_phosphatase_2C	IPR005225:Small GTP-binding protein domain//IPR027417:P-loop containing nucleoside triphosphate hydrolase
LOC111377193	4717.46	1.59104	3.01266	0.125785	12.6489	1.13e-36	1.86e-35		bark_storage_protein_A-like	Olive		IPR000048:IQ motif, EF-hand binding site
LOC111390533	295.053	1.59095	3.01248	0.187466	8.48665	2.13e-17	1.63e-16	XP_022871360.1	tuberculostearic_acid_methyltransferase_UfaA1-like,_transcript_variant_X9	Olive	PF02353:Mycolic_acid_cyclopropane_synthetase	IPR036869:Chaperone J-domain superfamily//IPR018253:DnaJ domain, conserved site//IPR001623:DnaJ domain
LOC111395367	295.45	1.58622	3.00262	0.216665	7.32107	2.46e-13	1.48e-12	XP_022877108.1	protein_ABHD17B-like	Olive		IPR000719:Protein kinase domain//IPR011009:Protein kinase-like domain superfamily//IPR008271:Serine/threonine-protein kinase, active site//IPR017441:Protein kinase, ATP binding site
LOC111377791	254.218	1.58486	2.99978	0.198748	7.97423	1.53e-15	1.06e-14			Olive		IPR000719:Protein kinase domain//IPR032675:Leucine-rich repeat domain superfamily//IPR011009:Protein kinase-like domain superfamily//IPR008271:Serine/threonine-protein kinase, active site//IPR003591:Leucine-rich repeat, typical subtype
LOC111377973	104.881	1.5822	2.99427	0.325125	4.86645	1.14e-06	3.96e-06		serine/threonine-protein_kinase_haspin_homolog	Olive		IPR009072:Histone-fold//IPR002119:Histone H2A//IPR032458:Histone H2A conserved site
LOC111390782	407.147	1.58077	2.9913	0.164124	9.63157	5.88e-22	5.61e-21	XP_022871657.1	protein_IQ-DOMAIN_31-like	Olive	PF00612:IQ_calmodulin-binding_motif//PF13178:Protein_of_unknown_function_(DUF4005)	IPR001789:Signal transduction response regulator, receiver domain//IPR006447:Myb domain, plants//IPR017930:Myb domain//IPR009057:Homeobox-like domain superfamily//IPR011006:CheY-like superfamily//IPR017053:Response regulator B-type, plant
LOC111393760	808.195	1.58056	2.99087	0.127182	12.4276	1.85e-35	2.93e-34	XP_022875219.1	auxin-induced_in_root_cultures_protein_12	Olive	PF04526:Protein_of_unknown_function_(DUF568)	IPR036075:AF1104-like superfamily
LOC111405919	246.439	1.57996	2.98962	0.215104	7.34512	2.06e-13	1.25e-12	XP_022890795.1	alpha-galactosidase_1-like	Olive	PF17801:Alpha_galactosidase_C-terminal_beta_sandwich_domain//PF16499:Alpha_galactosidase_A
LOC111375141	129.089	1.57616	2.98176	0.279029	5.64876	1.62e-08	6.81e-08	XP_022853703.1	probable_inactive_patatin-like_protein_9	Olive	PF01734:Patatin-like_phospholipase
LOC111380925	701.935	1.57443	2.97818	0.213704	7.36734	1.74e-13	1.06e-12	XP_022860369.1	3-hydroxyisobutyryl-CoA_hydrolase-like_protein_5,_transcript_variant_X4	Olive	PF16113:Enoyl-CoA_hydratase/isomerase
LOC111383226	86.0435	1.57356	2.97637	0.318119	4.94643	7.56e-07	2.69e-06	XP_022863077.1	uncharacterized_LOC111383226	Olive		IPR036965:Terpene synthase, N-terminal domain superfamily//IPR008949:Isoprenoid synthase domain superfamily//IPR008930:Terpenoid cyclases/protein prenyltransferase alpha-alpha toroid
LOC111371429	185.677	1.57111	2.97133	0.220886	7.11276	1.14e-12	6.57e-12	XP_022849182.1	60S_ribosomal_protein_L5	Olive	PF17144:Ribosomal_large_subunit_proteins_60S_L5,_and_50S_L18//PF14204:Ribosomal_L18_C-terminal_region	IPR023213:Chloramphenicol acetyltransferase-like domain superfamily
LOC111381287	66.8191	1.57094	2.97099	0.355414	4.42003	9.87e-06	3.07e-05	XP_022860824.1	17.3_kDa_class_I_heat_shock_protein-like	Olive	PF00011:Hsp20/alpha_crystallin_family	IPR017441:Protein kinase, ATP binding site//IPR000719:Protein kinase domain//IPR002048:EF-hand domain//IPR018247:EF-Hand 1, calcium-binding site//IPR008271:Serine/threonine-protein kinase, active site//IPR011992:EF-hand domain pair//IPR011009:Protein kinase-like domain superfamily
LOC111399737	310.376	1.57044	2.96996	0.177702	8.83753	9.79e-19	7.99e-18	XP_022882976.1	uncharacterized_LOC111399737	Olive	PF04788:Protein_of_unknown_function_(DUF620)	IPR036291:NAD(P)-binding domain superfamily//IPR005886:UDP-glucose 4-epimerase
LOC111372605	149.759	1.56989	2.96881	0.245154	6.40368	1.52e-10	7.55e-10	XP_022850745.1	lamin-like_protein,_transcript_variant_X2	Olive	PF02298:Plastocyanin-like_domain	IPR003377:Cornichon
LOC111367959	737.108	1.56784	2.9646	0.159861	9.80749	1.05e-22	1.03e-21	XP_022844868.1	protein_IQ-DOMAIN_31-like,_transcript_variant_X6	Olive	PF00612:IQ_calmodulin-binding_motif//PF13178:Protein_of_unknown_function_(DUF4005)
LOC111387308	138.369	1.56728	2.96346	0.242696	6.45781	1.06e-10	5.35e-10	XP_022867624.1	uncharacterized_LOC111387308	Olive
LOC111399330	88.6523	1.56421	2.95716	0.304697	5.13365	2.84e-07	1.06e-06	XP_022882354.1	laccase-4-like	Olive	PF00394:Multicopper_oxidase//PF07731:Multicopper_oxidase	IPR024709:Putative O-fucosyltransferase, plant
LOC111383762	148.32	1.56408	2.95688	0.313782	4.98459	6.21e-07	2.23e-06	XP_022863676.1	NADH--cytochrome_b5_reductase_1-like	Olive	PF00175:Oxidoreductase_NAD-binding_domain	IPR000270:PB1 domain//IPR013783:Immunoglobulin-like fold//IPR043145:Zinc finger, ZZ-type superfamily//IPR032350:Next to BRCA1, central domain//IPR000433:Zinc finger, ZZ-type//IPR015940:Ubiquitin-associated domain
LOC111383022	376.73	1.56051	2.94958	0.170605	9.14691	5.86e-20	5.08e-19	XP_022862844.1	leucine-rich_repeat_receptor-like_protein_kinase_TDR	Olive	PF00069:Protein_kinase_domain//PF13855:Leucine_rich_repeat//PF13516:Leucine_Rich_repeat//PF00560:Leucine_Rich_Repeat
LOC111379855	1056.01	1.5602	2.94895	0.121532	12.8378	1.01e-37	1.7e-36	XP_022859058.1	uncharacterized_LOC111379855	Olive	PF03080:Neprosin//PF14365:Neprosin_activation_peptide
LOC111371734	413.855	1.55782	2.94408	0.293196	5.31321	1.08e-07	4.17e-07	XP_022849638.1	cellulose_synthase-like_protein_G3	Olive	PF03552:Cellulose_synthase
LOC111395519	462.271	1.55307	2.93441	0.167349	9.28045	1.69e-20	1.49e-19	XP_022877309.1	probable_receptor-like_protein_kinase_At2g42960	Olive	PF00069:Protein_kinase_domain	IPR002222:Ribosomal protein S19/S15//IPR023575:Ribosomal protein S19, superfamily//IPR005713:Ribosomal protein S19A/S15e//IPR020934:Ribosomal protein S19 conserved site
LOC111380051	2002.13	1.55021	2.92861	0.236416	6.55714	5.48e-11	2.83e-10	XP_022859281.1	probable_xyloglucan_endotransglucosylase/hydrolase_protein_B	Olive	PF00722:Glycosyl_hydrolases_family_16	IPR001480:Bulb-type lectin domain//IPR000719:Protein kinase domain//IPR024171:S-receptor-like serine/threonine-protein kinase//IPR011009:Protein kinase-like domain superfamily//IPR008271:Serine/threonine-protein kinase, active site//IPR036426:Bulb-type lectin domain superfamily//IPR000742:EGF-like domain//IPR003609:PAN/Apple domain
LOC111382747	299.224	1.5502	2.92858	0.174974	8.85963	8.03e-19	6.59e-18	XP_022862553.1	probable_protein_S-acyltransferase_7,_transcript_variant_X2	Olive	PF01529:DHHC_palmitoyltransferase
LOC111391548	747.232	1.54972	2.92761	0.138766	11.1679	5.86e-29	7.48e-28	XP_022872584.1	BAG_family_molecular_chaperone_regulator_7-like	Olive	PF02179:BAG_domain	IPR039204:Magnesium transporter MRS2-like
LOC111399695	327.082	1.54813	2.92438	0.173431	8.92648	4.4e-19	3.65e-18	XP_022882919.1	enoyl-[acyl-carrier-protein]_reductase_[NADH],_chloroplastic-like	Olive	PF13561:Enoyl-(Acyl_carrier_protein)_reductase	IPR032675:Leucine-rich repeat domain superfamily
LOC111389161	86.1944	1.54698	2.92205	0.357204	4.33081	1.49e-05	4.51e-05	XP_022869812.1	CMP-sialic_acid_transporter_4,_transcript_variant_X3	Olive	PF04142:Nucleotide-sugar_transporter	IPR000504:RNA recognition motif domain//IPR035979:RNA-binding domain superfamily//IPR012677:Nucleotide-binding alpha-beta plait domain superfamily//IPR036875:Zinc finger, CCHC-type superfamily//IPR004087:K Homology domain//IPR036612:K Homology domain, type 1 superfamily//IPR002343:Paraneoplastic encephalomyelitis antigen//IPR001878:Zinc finger, CCHC-type
LOC111368886	67.8465	1.54618	2.92043	0.373234	4.14266	3.43e-05	9.97e-05	XP_022846144.1	transcription_factor_TCP4-like	Olive	PF03634:TCP_family_transcription_factor
LOC111387329	468.278	1.54591	2.91987	0.158972	9.72441	2.37e-22	2.31e-21	XP_022867655.1	nitrate_regulatory_gene2_protein-like	Olive	PF04782:Protein_of_unknown_function_(DUF632)//PF04783:Protein_of_unknown_function_(DUF630)	IPR027417:P-loop containing nucleoside triphosphate hydrolase//IPR003593:AAA+ ATPase domain//IPR017871:ABC transporter, conserved site//IPR003439:ABC transporter-like
LOC111408975	305.077	1.54203	2.91204	0.250578	6.15389	7.56e-10	3.56e-09	XP_022894621.1	uncharacterized_LOC111408975,_transcript_variant_X2	Olive	PF03398:Regulator_of_Vps4_activity_in_the_MVB_pathway	IPR001841:Zinc finger, RING-type//IPR013083:Zinc finger, RING/FYVE/PHD-type
LOC111395239	87.1158	1.54066	2.90928	0.314619	4.89691	9.74e-07	3.42e-06	XP_022876997.1	uncharacterized_protein_At1g66480-like	Olive	PF14009:Domain_of_unknown_function_(DUF4228)
LOC111382995	145.483	1.53774	2.9034	0.301516	5.10004	3.4e-07	1.25e-06			Olive		IPR001295:Dihydroorotate dehydrogenase, conserved site//IPR005719:Dihydroorotate dehydrogenase, class 2//IPR013785:Aldolase-type TIM barrel
LOC111376655	264.926	1.53729	2.90249	0.208609	7.36922	1.72e-13	1.04e-12	XP_022855394.1	aminomethyltransferase,_mitochondrial-like	Olive	PF01571:Aminomethyltransferase_folate-binding_domain//PF08669:Glycine_cleavage_T-protein_C-terminal_barrel_domain
LOC111397333	355.784	1.53563	2.89914	0.170864	8.98742	2.53e-19	2.13e-18	XP_022879963.1	microtubule-associated_protein_TORTIFOLIA1-like	Olive		IPR003960:ATPase, AAA-type, conserved site//IPR005936:Peptidase, FtsH//IPR003593:AAA+ ATPase domain//IPR037219:Peptidase M41-like//IPR027417:P-loop containing nucleoside triphosphate hydrolase
LOC111401059	187.967	1.53332	2.8945	0.269443	5.69069	1.27e-08	5.38e-08	XP_022884371.1	putative_lipid_phosphate_phosphatase_3,_chloroplastic,_transcript_variant_X5	Olive	PF00642:Zinc_finger_C-x8-C-x5-C-x3-H_type_(and_similar)//PF01569:PAP2_superfamily
LOC111404093	534.541	1.53314	2.89416	0.153674	9.97659	1.93e-23	1.96e-22	XP_022888599.1	glutamate_synthase_[NADH],_amyloplastic-like	Olive	PF14691:Dihydroprymidine_dehydrogenase_domain_II,_4Fe-4S_cluster//PF07992:Pyridine_nucleotide-disulphide_oxidoreductase	IPR005467:Histidine kinase domain//IPR036097:Signal transduction histidine kinase, dimerisation/phosphoacceptor domain superfamily//IPR003661:Signal transduction histidine kinase, dimerisation/phosphoacceptor domain//IPR003594:Histidine kinase/HSP90-like ATPase//IPR036890:Histidine kinase/HSP90-like ATPase superfamily//IPR004358:Signal transduction histidine kinase-related protein, C-terminal
LOC111394934	68.0732	1.53295	2.89376	0.364093	4.21032	2.55e-05	7.53e-05	XP_022876747.1	auxin-responsive_protein_SAUR50-like	Olive	PF02519:Auxin_responsive_protein	IPR029510:Aldehyde dehydrogenase, glutamic acid active site//IPR016163:Aldehyde dehydrogenase, C-terminal//IPR016162:Aldehyde dehydrogenase, N-terminal//IPR016160:Aldehyde dehydrogenase, cysteine active site//IPR016161:Aldehyde/histidinol dehydrogenase
LOC111384291	696.77	1.53274	2.89336	0.237187	6.46218	1.03e-10	5.2e-10	XP_022864323.1	protein_argonaute_4A-like	Olive	PF02171:Piwi_domain	IPR036047:F-box-like domain superfamily//IPR001810:F-box domain//IPR017451:F-box associated interaction domain
LOC111412547	265.638	1.53106	2.88998	0.200395	7.64021	2.17e-14	1.4e-13	XP_022899251.1	rho_GTPase-activating_protein_5-like	Olive	PF00786:P21-Rho-binding_domain//PF00620:RhoGAP_domain	IPR031968:VASt domain
LOC111404252	1856.37	1.52644	2.88074	0.119704	12.7518	3.04e-37	5.07e-36	XP_022888824.1	uncharacterized_LOC111404252,_transcript_variant_X3	Olive	PF10358:N-terminal_C2_in_EEIG1_and_EHBP1_proteins
LOC111365406	684.503	1.52058	2.86907	0.152071	9.99915	1.54e-23	1.57e-22	XP_022841697.1	probable_protein_S-acyltransferase_7	Olive	PF01529:DHHC_palmitoyltransferase	IPR006476:Conserved hypothetical protein CHP01589, plant
LOC111394586	1029.25	1.51794	2.86381	0.14075	10.7846	4.07e-27	4.81e-26	XP_022876253.1	diaminopimelate_decarboxylase_1,_chloroplastic-like	Olive	PF02784:Pyridoxal-dependent_decarboxylase,_pyridoxal_binding_domain//PF00278:Pyridoxal-dependent_decarboxylase,_C-terminal_sheet_domain
LOC111391854	1024.51	1.51715	2.86225	0.165288	9.17879	4.36e-20	3.8e-19	XP_022872900.1	probable_receptor-like_protein_kinase_At2g42960,_transcript_variant_X2	Olive	PF00069:Protein_kinase_domain
LOC111386700	376.572	1.51625	2.86046	0.233953	6.48099	9.11e-11	4.61e-10	XP_022866932.1	cyclin-dependent_kinases_regulatory_subunit_1-like	Olive	PF01111:Cyclin-dependent_kinase_regulatory_subunit	IPR036291:NAD(P)-binding domain superfamily//IPR011032:GroES-like superfamily//IPR002328:Alcohol dehydrogenase, zinc-type, conserved site
LOC111401606	3107.12	1.51526	2.85851	0.156086	9.70785	2.79e-22	2.7e-21	XP_022885183.1	chlorophyll_a-b_binding_protein_4,_chloroplastic-like	Olive	PF00504:Chlorophyll_A-B_binding_protein	IPR017930:Myb domain//IPR009057:Homeobox-like domain superfamily//IPR001005:SANT/Myb domain
LOC111382990	202.387	1.51225	2.85254	0.221213	6.83616	8.13e-12	4.44e-11	XP_022862801.1	TPR_repeat-containing_thioredoxin_TTL1-like	Olive	PF00085:Thioredoxin//PF13414:TPR_repeat
LOC111389898	528.256	1.50443	2.83712	0.175639	8.56543	1.08e-17	8.38e-17	XP_022870649.1	uncharacterized_LOC111389898	Olive	PF02517:CPBP_intramembrane_metalloprotease	IPR001471:AP2/ERF domain//IPR036955:AP2/ERF domain superfamily//IPR016177:DNA-binding domain superfamily
LOC111369579	138.522	1.50262	2.83357	0.289182	5.19611	2.03e-07	7.67e-07		uncharacterized_LOC111369579	Olive		IPR001611:Leucine-rich repeat//IPR003591:Leucine-rich repeat, typical subtype//IPR032675:Leucine-rich repeat domain superfamily
LOC111370567	494.062	1.50229	2.83292	0.155963	9.63233	5.84e-22	5.57e-21	XP_022848100.1	protein_STRUBBELIG-RECEPTOR_FAMILY_3-like,_transcript_variant_X3	Olive	PF07714:Protein_tyrosine_kinase//PF08263:Leucine_rich_repeat_N-terminal_domain//PF13855:Leucine_rich_repeat
LOC111389902	1761.6	1.50054	2.82948	0.135922	11.0397	2.46e-28	3.07e-27	XP_022870654.1	two-component_response_regulator-like_APRR2	Olive	PF00249:Myb-like_DNA-binding_domain	IPR000008:C2 domain//IPR001164:Arf GTPase activating protein//IPR037278:ARFGAP/RecO-like zinc finger//IPR038508:ArfGAP domain superfamily//IPR035892:C2 domain superfamily
LOC111400468	120.395	1.49978	2.828	0.27164	5.5212	3.37e-08	1.38e-07	XP_022883652.1	serine_carboxypeptidase-like_48	Olive	PF00450:Serine_carboxypeptidase	IPR012392:Very-long-chain 3-ketoacyl-CoA synthase//IPR016039:Thiolase-like
LOC111399979	1112.51	1.49904	2.82654	0.1285	11.6656	1.91e-31	2.67e-30	XP_022883229.1	tubulin_beta-2_chain	Olive	PF00091:Tubulin/FtsZ_family,_GTPase_domain//PF03953:Tubulin_C-terminal_domain
LOC111377440	410.365	1.4985	2.8255	0.162615	9.21506	3.11e-20	2.72e-19	XP_022856300.1	vegetative_cell_wall_protein_gp1-like	Olive		IPR006615:Peptidase C19, ubiquitin-specific peptidase, DUSP domain//IPR035927:DUSP-like superfamily//IPR028889:Ubiquitin specific protease domain//IPR038765:Papain-like cysteine peptidase superfamily//IPR018200:Ubiquitin specific protease, conserved site
LOC111377030	325.073	1.49652	2.82162	0.179003	8.36031	6.26e-17	4.67e-16	XP_022855828.1	probable_beta-D-xylosidase_2,_transcript_variant_X5	Olive	PF00933:Glycosyl_hydrolase_family_3_N_terminal_domain//PF01915:Glycosyl_hydrolase_family_3_C-terminal_domain//PF14310:Fibronectin_type_III-like_domain
LOC111391830	148.737	1.49497	2.81858	0.260647	5.73561	9.72e-09	4.17e-08	XP_022872865.1	deSI-like_protein_At4g17486,_transcript_variant_X3	Olive	PF05903:PPPDE_putative_peptidase_domain
LOC111399543	135.911	1.49026	2.8094	0.282412	5.27691	1.31e-07	5.05e-07	XP_022882686.1	uncharacterized_LOC111399543	Olive	PF03140:Plant_protein_of_unknown_function
LOC111385456	79.3278	1.49004	2.80897	0.368744	4.04085	5.33e-05	0.00015096	XP_022865622.1	uncharacterized_LOC111385456,_transcript_variant_X2	Olive	PF05910:Plant_protein_of_unknown_function_(DUF868)
LOC111368104	218.466	1.48846	2.8059	0.202407	7.35381	1.93e-13	1.17e-12	XP_022845079.1	anthranilate_phosphoribosyltransferase,_chloroplastic-like	Olive	PF02885:Glycosyl_transferase_family,_helical_bundle_domain//PF00591:Glycosyl_transferase_family,_a/b_domain	IPR033140:Lipase, GDXG, putative serine active site//IPR029058:Alpha/Beta hydrolase fold
LOC111396002	6697.43	1.48756	2.80415	0.1488	9.99707	1.57e-23	1.6e-22	XP_022878019.1	oxygen-evolving_enhancer_protein_3,_chloroplastic-like	Olive	PF05757:Oxygen_evolving_enhancer_protein_3_(PsbQ)
LOC111376370	105.911	1.4871	2.80325	0.274177	5.42389	5.83e-08	2.32e-07	XP_022855095.1	NDR1/HIN1-like_protein_13	Olive	PF03168:Late_embryogenesis_abundant_protein	IPR001841:Zinc finger, RING-type//IPR013083:Zinc finger, RING/FYVE/PHD-type
LOC111376157	65.423	1.48591	2.80093	0.361819	4.10677	4.01e-05	0.000115538	XP_022854866.1	early_nodulin-20	Olive		IPR003441:NAC domain//IPR036093:NAC domain superfamily
LOC111392400	103.122	1.48392	2.79708	0.28516	5.20382	1.95e-07	7.37e-07	XP_022873509.1	disease_resistance_response_protein_206-like	Olive	PF03018:Dirigent-like_protein	IPR027417:P-loop containing nucleoside triphosphate hydrolase
LOC111373132	293.329	1.48344	2.79614	0.190469	7.78834	6.79e-15	4.52e-14	XP_022851382.1	uncharacterized_protein_At5g41620-like	Olive		IPR008978:HSP20-like chaperone//IPR007052:CS domain
LOC111380371	621.656	1.48141	2.79221	0.185589	7.98221	1.44e-15	9.94e-15	XP_022859678.1	histidine_kinase_4,_transcript_variant_X2	Olive	PF00512:His_Kinase_A_(phospho-acceptor)_domain//PF00072:Response_regulator_receiver_domain//PF03924:CHASE_domain//PF02518:Histidine_kinase-,_DNA_gyrase_B-,_and_HSP90-like_ATPase	IPR001841:Zinc finger, RING-type
LOC111382803	1379.05	1.47961	2.78872	0.121777	12.1502	5.73e-34	8.67e-33		geranylgeranyl_pyrophosphate_synthase,_chloroplastic	Olive		IPR000719:Protein kinase domain//IPR008271:Serine/threonine-protein kinase, active site//IPR014729:Rossmann-like alpha/beta/alpha sandwich fold//IPR011009:Protein kinase-like domain superfamily//IPR017441:Protein kinase, ATP binding site
LOC111388429	146.088	1.47926	2.78805	0.249243	5.93499	2.94e-09	1.32e-08	XP_022868896.1	cell_division_protein_FtsZ_homolog_2-1,_chloroplastic-like,_transcript_variant_X4	Olive	PF00091:Tubulin/FtsZ_family,_GTPase_domain//PF12327:FtsZ_family,_C-terminal_domain
LOC111380601	784.131	1.47468	2.77922	0.154834	9.52428	1.66e-21	1.55e-20	XP_022859982.1	probable_pectate_lyase_5	Olive	PF00544:Pectate_lyase	IPR011527:ABC transporter type 1, transmembrane domain//IPR036640:ABC transporter type 1, transmembrane domain superfamily//IPR027417:P-loop containing nucleoside triphosphate hydrolase
LOC111405148	65.3208	1.47462	2.7791	0.403975	3.65026	0.00026197	0.000672236	XP_022889677.1	methyltransferase-like_protein_22,_transcript_variant_X3	Olive		IPR036361:SAP domain superfamily//IPR003034:SAP domain//IPR011990:Tetratricopeptide-like helical domain superfamily
LOC111384866	67.856	1.47411	2.77812	0.344784	4.27546	1.91e-05	5.72e-05			Olive		IPR012337:Ribonuclease H-like superfamily//IPR002156:Ribonuclease H domain//IPR036397:Ribonuclease H superfamily//IPR043502:DNA/RNA polymerase superfamily
LOC111386617	255.474	1.47302	2.77602	0.207396	7.10243	1.23e-12	7.06e-12	XP_022866856.1	30S_ribosomal_protein_2,_chloroplastic	Olive	PF00076:RNA_recognition_motif._(a.k.a._RRM,_RBD,_or_RNP_domain)	IPR008854:TPMT family//IPR029063:S-adenosyl-L-methionine-dependent methyltransferase
LOC111405550	278.678	1.47268	2.77538	0.181219	8.12655	4.42e-16	3.14e-15	XP_022890263.1	WD_repeat-containing_protein_WRAP73	Olive	PF00400:WD_domain,_G-beta_repeat	IPR036774:ERV/ALR sulfhydryl oxidase domain superfamily//IPR017905:ERV/ALR sulfhydryl oxidase domain
LOC111408061	169.807	1.47128	2.77268	0.221056	6.6557	2.82e-11	1.48e-10	XP_022893594.1	transcription_factor_bHLH96-like	Olive	PF00010:Helix-loop-helix_DNA-binding_domain
LOC111382593	374.985	1.46617	2.76288	0.205737	7.12643	1.03e-12	5.96e-12	XP_022862381.1	aquaporin_PIP2-1-like	Olive	PF00230:Major_intrinsic_protein	IPR006638:Elp3/MiaB/NifB//IPR024177:Biotin synthase//IPR007197:Radical SAM//IPR002684:Biotin synthase/Biotin biosynthesis bifunctional protein BioAB//IPR013785:Aldolase-type TIM barrel//IPR010722:Biotin and thiamin synthesis-associated domain
LOC111396668	232.2	1.46515	2.76092	0.210795	6.95057	3.64e-12	2.03e-11	XP_022878890.1	probable_receptor-like_protein_kinase_At5g24010	Olive	PF07714:Protein_tyrosine_kinase//PF12819:Malectin-like_domain	IPR000008:C2 domain//IPR031968:VASt domain//IPR035892:C2 domain superfamily//IPR011993:PH-like domain superfamily//IPR004182:GRAM domain
LOC111378414	224.439	1.46502	2.76067	0.214774	6.82122	9.03e-12	4.91e-11	XP_022857376.1	fasciclin-like_arabinogalactan_protein_4	Olive	PF02469:Fasciclin_domain	IPR007822:Lanthionine synthetase C-like//IPR012341:Six-hairpin glycosidase-like superfamily//IPR020464:LanC-like protein, eukaryotic
LOC111388933	377.34	1.46215	2.75519	0.160492	9.11042	8.21e-20	7.08e-19			Olive		IPR002885:Pentatricopeptide repeat//IPR011990:Tetratricopeptide-like helical domain superfamily
LOC111375950	1615.74	1.46206	2.75502	0.124851	11.7104	1.13e-31	1.59e-30	XP_022854643.1	expansin-A6-like	Olive	PF03330:Lytic_transglycolase//PF01357:Pollen_allergen	IPR003451:4-hydroxy-3-methylbut-2-enyl diphosphate reductase
LOC111393574	463.237	1.45995	2.75099	0.193905	7.5292	5.11e-14	3.21e-13	XP_022874940.1	cytochrome_P450_71A4-like	Olive	PF00067:Cytochrome_P450	IPR029413:Rhamnogalacturonan lyase, domain II//IPR013784:Carbohydrate-binding-like fold//IPR008979:Galactose-binding-like domain superfamily
LOC111369410	107.862	1.45816	2.74759	0.27172	5.36642	8.03e-08	3.15e-07	XP_022846682.1	serine-rich_adhesin_for_platelets-like,_transcript_variant_X3	Olive		IPR000308:14-3-3 protein//IPR023410:14-3-3 domain//IPR036815:14-3-3 domain superfamily//IPR023409:14-3-3 protein, conserved site
LOC111397552	281.763	1.45711	2.74558	0.191621	7.60414	2.87e-14	1.84e-13	XP_022880312.1	galactan_beta-1,4-galactosyltransferase_GALS1	Olive	PF01697:Glycosyltransferase_family_92	IPR008972:Cupredoxin//IPR034275:Ascorbate oxidase homologue, third cupredoxin domain//IPR034273:Ascorbate oxidase homologue, first cupredoxin domain
LOC111384682	141.1	1.45417	2.73999	0.24914	5.83676	5.32e-09	2.34e-08	XP_022864770.1	serine/threonine-protein_kinase-like_protein_At3g51990	Olive	PF00069:Protein_kinase_domain	IPR002125:Cytidine and deoxycytidylate deaminase domain//IPR016192:APOBEC/CMP deaminase, zinc-binding//IPR016193:Cytidine deaminase-like
LOC111393277	213.722	1.4504	2.73284	0.214868	6.75019	1.48e-11	7.9e-11	XP_022874511.1	protein_PATRONUS_2-like,_transcript_variant_X2	Olive		IPR005225:Small GTP-binding protein domain//IPR027417:P-loop containing nucleoside triphosphate hydrolase
LOC111392511	990.323	1.45036	2.73276	0.127891	11.3405	8.26e-30	1.08e-28	XP_022873643.1	phospholipase_A1-Igamma3,_chloroplastic-like	Olive	PF01764:Lipase_(class_3)	IPR013087:Zinc finger C2H2-type//IPR036236:Zinc finger C2H2 superfamily
LOC111394814	1750.01	1.44863	2.72949	0.111838	12.953	2.26e-38	3.92e-37	XP_022876595.1	protein_CELLULOSE_SYNTHASE_INTERACTIVE_1,_transcript_variant_X3	Olive	PF00168:C2_domain//PF00514:Armadillo/beta-catenin-like_repeat
LOC111373803	393.559	1.4478	2.72792	0.168898	8.57204	1.02e-17	7.92e-17	XP_022852134.1	probable_WRKY_transcription_factor_57	Olive	PF03106:WRKY_DNA_-binding_domain
LOC111386268	132.053	1.44352	2.71984	0.250434	5.76408	8.21e-09	3.55e-08	XP_022866499.1	uncharacterized_LOC111386268,_transcript_variant_X6	Olive		IPR027629:Putative protein phosphatase DevT-like//IPR029052:Metallo-dependent phosphatase-like
LOC111372354	131.062	1.44118	2.71543	0.246651	5.84298	5.13e-09	2.26e-08	XP_022850417.1	oxygen-evolving_enhancer_protein_2,_chloroplastic-like	Olive	PF01789:PsbP
LOC111398937	1799.52	1.44078	2.71468	0.110754	13.0088	1.09e-38	1.91e-37	XP_022881877.1	patellin-6-like	Olive	PF00650:CRAL/TRIO_domain//PF03765:CRAL/TRIO,_N-terminal_domain	IPR018545:Btz domain
LOC111374017	142.79	1.43973	2.71269	0.302883	4.7534	2e-06	6.8e-06	XP_022852392.1	neutral_ceramidase-like	Olive	PF04734:Neutral/alkaline_non-lysosomal_ceramidase,_N-terminal	IPR016024:Armadillo-type fold//IPR011989:Armadillo-like helical
LOC111410141	223.268	1.43774	2.70895	0.325551	4.41632	1e-05	3.12e-05	XP_022896128.1	stress_enhanced_protein_1,_chloroplastic-like	Olive		IPR033132:Glycosyl hydrolases family 1, N-terminal conserved site//IPR017853:Glycoside hydrolase superfamily
LOC111381659	7283.77	1.43689	2.70736	0.478361	3.00377	0.00266659	0.00582376	XP_022861228.1	probable_methylenetetrahydrofolate_reductase	Olive	PF02219:Methylenetetrahydrofolate_reductase	IPR012677:Nucleotide-binding alpha-beta plait domain superfamily//IPR000504:RNA recognition motif domain//IPR035979:RNA-binding domain superfamily
LOC111402241	92.6354	1.43674	2.70708	0.311102	4.61821	3.87e-06	1.26e-05	XP_022886176.1	uncharacterized_LOC111402241,_transcript_variant_X2	Olive	PF04862:Protein_of_unknown_function_(DUF642)	IPR036259:MFS transporter superfamily
LOC111395916	61.3572	1.43425	2.70242	0.356472	4.02346	5.73e-05	0.000161927	XP_022877909.1	transcription_factor_bHLH49-like	Olive	PF00010:Helix-loop-helix_DNA-binding_domain	IPR001471:AP2/ERF domain//IPR016177:DNA-binding domain superfamily//IPR036955:AP2/ERF domain superfamily
LOC111397372	99.2258	1.43261	2.69935	0.295532	4.84757	1.25e-06	4.34e-06		uncharacterized_LOC111397372,_transcript_variant_X2	Olive		IPR019787:Zinc finger, PHD-finger//IPR013083:Zinc finger, RING/FYVE/PHD-type//IPR011011:Zinc finger, FYVE/PHD-type//IPR001965:Zinc finger, PHD-type//IPR034732:Extended PHD (ePHD) domain
LOC111381891	3327.55	1.43004	2.69455	0.175289	8.1582	3.4e-16	2.44e-15	XP_022861505.1	ferredoxin--NADP_reductase,_leaf-type_isozyme,_chloroplastic,_transcript_variant_X2	Olive	PF00175:Oxidoreductase_NAD-binding_domain	IPR024927:Purple acid phosphatase//IPR029052:Metallo-dependent phosphatase-like
LOC111390941	14933.4	1.42978	2.69405	0.114379	12.5003	7.43e-36	1.19e-34	XP_022871835.1	peptide-N4-(N-acetyl-beta-glucosaminyl)asparagine_amidase_A-like	Olive	PF12222:Peptide_N-acetyl-beta-D-glucosaminyl_asparaginase_amidase_A
LOC111409918	175.402	1.42962	2.69376	0.261871	5.45925	4.78e-08	1.92e-07	XP_022895796.1	rhodanese-like_domain-containing_protein_4,_chloroplastic	Olive
LOC111369513	201.974	1.42895	2.6925	0.212773	6.71583	1.87e-11	9.94e-11		uncharacterized_LOC111369513	Olive
LOC111368475	137.074	1.42871	2.69207	0.250747	5.69783	1.21e-08	5.17e-08	XP_022845491.1	uncharacterized_LOC111368475,_transcript_variant_X2	Olive	PF13676:TIR_domain	IPR011990:Tetratricopeptide-like helical domain superfamily//IPR019734:Tetratricopeptide repeat//IPR000744:NSF attachment protein//IPR013026:Tetratricopeptide repeat-containing domain
LOC111371329	177.823	1.42711	2.68908	0.226295	6.30642	2.86e-10	1.39e-09	XP_022849017.1	dihydrolipoyl_dehydrogenase_1,_chloroplastic-like,_transcript_variant_X2	Olive	PF02852:Pyridine_nucleotide-disulphide_oxidoreductase,_dimerisation_domain//PF07992:Pyridine_nucleotide-disulphide_oxidoreductase
LOC111407595	1088.78	1.42085	2.67743	0.157715	9.009	2.08e-19	1.76e-18	XP_022892962.1	2-C-methyl-D-erythritol_2,4-cyclodiphosphate_synthase,_chloroplastic	Olive	PF02542:YgbB_family	IPR001005:SANT/Myb domain//IPR009057:Homeobox-like domain superfamily//IPR017930:Myb domain//IPR006447:Myb domain, plants//IPR017884:SANT domain
LOC111367691	102.211	1.41874	2.67351	0.288229	4.92226	8.56e-07	3.02e-06	XP_022844457.1	NDR1/HIN1-like_protein_13	Olive	PF03168:Late_embryogenesis_abundant_protein
LOC111389914	463.08	1.41679	2.66991	0.152588	9.28507	1.62e-20	1.43e-19	XP_022870669.1	E3_ubiquitin-protein_ligase_KEG-like,_transcript_variant_X2	Olive	PF07714:Protein_tyrosine_kinase	IPR003851:Zinc finger, Dof-type
LOC111393276	1079.03	1.41672	2.66978	0.137667	10.2909	7.75e-25	8.35e-24	XP_022874498.1	3-isopropylmalate_dehydrogenase,_chloroplastic-like,_transcript_variant_X2	Olive	PF00180:Isocitrate/isopropylmalate_dehydrogenase
LOC111372423	9761.28	1.41618	2.66879	0.242244	5.84611	5.03e-09	2.22e-08	XP_022850537.1	putative_serine_carboxypeptidase-like_52	Olive	PF00450:Serine_carboxypeptidase
LOC111373133	947.779	1.41561	2.66773	0.247663	5.71589	1.09e-08	4.67e-08	XP_022851383.1	photosystem_I_subunit_O	Olive
LOC111375579	235.165	1.41419	2.6651	0.239838	5.89645	3.71e-09	1.66e-08	XP_022854185.1	uncharacterized_LOC111375579	Olive
LOC111367883	144.184	1.4109	2.65904	0.264263	5.33901	9.35e-08	3.64e-07	XP_022844743.1	filament-like_plant_protein_7,_transcript_variant_X5	Olive	PF05911:Filament-like_plant_protein,_long_coiled-coil
LOC111399612	128.932	1.40977	2.65695	0.268938	5.24199	1.59e-07	6.05e-07	XP_022882789.1	uncharacterized_LOC111399612	Olive	PF16740:Spindle_and_kinetochore-associated_protein_2	IPR001611:Leucine-rich repeat//IPR032675:Leucine-rich repeat domain superfamily//IPR003591:Leucine-rich repeat, typical subtype
LOC111403178	309.309	1.40832	2.65428	0.186413	7.55486	4.19e-14	2.65e-13	XP_022887350.1	probable_serine/threonine-protein_kinase_BSK3	Olive	PF07714:Protein_tyrosine_kinase
LOC111374973	2046.35	1.40825	2.65414	0.117325	12.003	3.43e-33	5.07e-32	XP_022853503.1	delta(24)-sterol_reductase,_transcript_variant_X3	Olive	PF01565:FAD_binding_domain	IPR002123:Phospholipid/glycerol acyltransferase
LOC111400995	337.565	1.40791	2.65352	0.195709	7.19388	6.3e-13	3.7e-12	XP_022884271.1	phosphatidylinositol_3,4,5-trisphosphate_3-phosphatase_and_protein-tyrosine-phosphatase_PTEN2A-like	Olive		IPR018108:Mitochondrial substrate/solute carrier//IPR023395:Mitochondrial carrier domain superfamily
LOC111385743	102.58	1.40559	2.64926	0.308095	4.5622	5.06e-06	1.63e-05	XP_022865929.1	rho_GTPase-activating_protein_3-like	Olive	PF00786:P21-Rho-binding_domain//PF00620:RhoGAP_domain	IPR011009:Protein kinase-like domain superfamily//IPR036426:Bulb-type lectin domain superfamily//IPR001480:Bulb-type lectin domain//IPR024171:S-receptor-like serine/threonine-protein kinase//IPR000719:Protein kinase domain//IPR008271:Serine/threonine-protein kinase, active site
LOC111397576	558.29	1.40445	2.64716	0.140713	9.98095	1.85e-23	1.88e-22			Olive		IPR003388:Reticulon
LOC111371363	312.968	1.40387	2.6461	0.18912	7.42314	1.14e-13	7.03e-13	XP_022849071.1	kinesin-like_protein_KIN-5D,_transcript_variant_X2	Olive	PF00225:Kinesin_motor_domain	IPR011016:Zinc finger, RING-CH-type//IPR013083:Zinc finger, RING/FYVE/PHD-type
LOC111390696	175.284	1.39877	2.63677	0.245076	5.70751	1.15e-08	4.89e-08	XP_022871544.1	probable_galactinol--sucrose_galactosyltransferase_6,_transcript_variant_X4	Olive	PF05691:Raffinose_synthase_or_seed_imbibition_protein_Sip1
LOC111393736	609.06	1.39839	2.63608	0.151581	9.2254	2.83e-20	2.48e-19	XP_022875192.1	formin-like_protein_1	Olive	PF02181:Formin_Homology_2_Domain	IPR006502:Protein of unknown function PDDEXK-like
LOC111398952	255.009	1.39497	2.62983	0.198415	7.03056	2.06e-12	1.17e-11	XP_022881898.1	proline-rich_receptor-like_protein_kinase_PERK9,_transcript_variant_X2	Olive	PF00069:Protein_kinase_domain	IPR013083:Zinc finger, RING/FYVE/PHD-type
LOC111381661	10106.5	1.39454	2.62906	0.0970024	14.3764	7.28e-47	1.63e-45	XP_022861230.1	7-deoxyloganetin_glucosyltransferase-like	Olive	PF00201:UDP-glucoronosyl_and_UDP-glucosyl_transferase
LOC111403915	2348.85	1.39429	2.62859	0.11072	12.5929	2.31e-36	3.77e-35	XP_022888348.1	subtilisin-like_protease_SBT1.3	Olive	PF00082:Subtilase_family//PF17766:Fibronectin_type-III_domain//PF02225:PA_domain//PF05922:Peptidase_inhibitor_I9	IPR022636:S-adenosylmethionine synthetase superfamily
LOC111366577	212.56	1.39359	2.62732	0.31977	4.35811	1.31e-05	4.02e-05	XP_022843075.1	photosynthetic_NDH_subunit_of_subcomplex_B_3,_chloroplastic-like	Olive	PF00111:2Fe-2S_iron-sulfur_cluster_binding_domain	IPR013320:Concanavalin A-like lectin/glucanase domain superfamily//IPR016455:Xyloglucan endotransglucosylase/hydrolase//IPR000757:Glycoside hydrolase family 16
LOC111384809	61.5217	1.39082	2.62228	0.348749	3.98802	6.66e-05	0.000186403	XP_022864908.1	probable_sugar_phosphate/phosphate_translocator_At3g14410	Olive	PF03151:Triose-phosphate_Transporter_family	IPR038635:CCR4-NOT complex subunit 2/3/5, N-terminal domain superfamily
LOC111388222	86.5598	1.3897	2.62024	0.299614	4.63829	3.51e-06	1.15e-05	XP_022868679.1	probable_polyamine_aminopropyl_transferase,_transcript_variant_X2	Olive		IPR006652:Kelch repeat type 1//IPR015915:Kelch-type beta propeller//IPR036047:F-box-like domain superfamily//IPR001810:F-box domain
LOC111384442	91.0676	1.38833	2.61776	0.289219	4.80028	1.58e-06	5.45e-06	XP_022864487.1	uncharacterized_LOC111384442	Olive		IPR001471:AP2/ERF domain//IPR016177:DNA-binding domain superfamily//IPR036955:AP2/ERF domain superfamily
LOC111384441	117.481	1.3838	2.60954	0.257894	5.36576	8.06e-08	3.16e-07		uncharacterized_protein_LOC111384441	Olive		IPR032675:Leucine-rich repeat domain superfamily//IPR006553:Leucine-rich repeat, cysteine-containing subtype
LOC111391533	159.952	1.38307	2.60822	0.249764	5.5375	3.07e-08	1.26e-07	XP_022872534.1	cytochrome_b561_and_DOMON_domain-containing_protein_At2g04850	Olive	PF04526:Protein_of_unknown_function_(DUF568)//PF03188:Eukaryotic_cytochrome_b561
LOC111400402	141.568	1.38305	2.6082	0.250828	5.51394	3.51e-08	1.43e-07	XP_022883588.1	uncharacterized_LOC111400402	Olive	PF01764:Lipase_(class_3)	IPR036638:Helix-loop-helix DNA-binding domain superfamily//IPR011598:Myc-type, basic helix-loop-helix (bHLH) domain
LOC111401631	554.093	1.37777	2.59866	0.145936	9.44091	3.7e-21	3.38e-20	XP_022885226.1	uncharacterized_LOC111401631	Olive	PF06549:Protein_of_unknown_function_(DUF1118)
LOC111400929	83.1819	1.37528	2.59418	0.316913	4.3396	1.43e-05	4.35e-05	XP_022884169.1	putative_methylesterase_11,_chloroplastic	Olive	PF12697:Alpha/beta_hydrolase_family	IPR001208:MCM domain//IPR018525:Mini-chromosome maintenance, conserved site//IPR012340:Nucleic acid-binding, OB-fold//IPR031327:Mini-chromosome maintenance protein//IPR008048:DNA replication licensing factor Mcm5//IPR027417:P-loop containing nucleoside triphosphate hydrolase
LOC111400981	698.049	1.37516	2.59397	0.133575	10.2951	7.42e-25	8e-24	XP_022884255.1	UPF0603_protein_At1g54780,_chloroplastic	Olive	PF04536:TPM_domain
LOC111410797	233.141	1.37437	2.59254	0.61506	2.23453	0.0254483	0.0456257	XP_022897098.1	B3_domain-containing_protein_At3g18960-like,_transcript_variant_X2	Olive	PF02362:B3_DNA_binding_domain
LOC111383582	651.661	1.37296	2.59001	0.2144	6.40371	1.52e-10	7.55e-10	XP_022863468.1	putative_dual_specificity_protein_phosphatase_DSP8	Olive	PF00782:Dual_specificity_phosphatase,_catalytic_domain	IPR002912:ACT domain
LOC111411069	106.304	1.37267	2.5895	0.289608	4.73977	2.14e-06	7.25e-06	XP_022897411.1	rac-like_GTP-binding_protein_ARAC7	Olive	PF00071:Ras_family	IPR036967:Ribosomal protein S11 superfamily//IPR018102:Ribosomal S11, conserved site//IPR001971:Ribosomal protein S11
LOC111409334	140.375	1.367	2.57933	0.261574	5.22606	1.73e-07	6.58e-07	XP_022895153.1	uncharacterized_LOC111409334,_transcript_variant_X6	Olive	PF12348:CLASP_N_terminal	IPR009057:Homeobox-like domain superfamily//IPR001005:SANT/Myb domain//IPR017930:Myb domain
LOC111401915	1344.41	1.36543	2.57653	0.114751	11.8991	1.2e-32	1.75e-31	XP_022885660.1	lamin-like_protein	Olive	PF02298:Plastocyanin-like_domain
LOC111401373	180.564	1.36252	2.57134	0.232836	5.85185	4.86e-09	2.15e-08	XP_022884844.1	uncharacterized_LOC111401373	Olive		IPR011009:Protein kinase-like domain superfamily//IPR000961:AGC-kinase, C-terminal//IPR017441:Protein kinase, ATP binding site//IPR008271:Serine/threonine-protein kinase, active site//IPR000719:Protein kinase domain
LOC111372878	130.333	1.36174	2.56995	0.247134	5.51011	3.59e-08	1.46e-07	XP_022851067.1	probable_leucine-rich_repeat_receptor-like_protein_kinase_At1g35710	Olive	PF00560:Leucine_Rich_Repeat//PF13516:Leucine_Rich_repeat//PF08263:Leucine_rich_repeat_N-terminal_domain	IPR013087:Zinc finger C2H2-type//IPR036236:Zinc finger C2H2 superfamily
LOC111367741	1205.72	1.36036	2.56749	0.190671	7.13457	9.71e-13	5.63e-12	XP_022844542.1	nascent_polypeptide-associated_complex_subunit_alpha-like_protein_2,_transcript_variant_X2	Olive	PF01849:NAC_domain
LOC111384273	141.86	1.35499	2.55796	0.260276	5.206	1.93e-07	7.29e-07	XP_022864307.1	nudix_hydrolase_23,_chloroplastic-like,_transcript_variant_X2	Olive	PF14803:Nudix_N-terminal//PF00293:NUDIX_domain	IPR006186:Serine/threonine-specific protein phosphatase/bis(5-nucleosyl)-tetraphosphatase//IPR029052:Metallo-dependent phosphatase-like
LOC111381743	483.319	1.35483	2.55767	0.212101	6.38764	1.68e-10	8.35e-10	XP_022861326.1	uncharacterized_LOC111381743	Olive
LOC111391233	466.858	1.35366	2.55559	0.176503	7.66931	1.73e-14	1.12e-13	XP_022872165.1	agmatine_deiminase	Olive	PF04371:Porphyromonas-type_peptidyl-arginine_deiminase	IPR011033:PRC-barrel-like superfamily
LOC111375219	295.962	1.35132	2.55145	0.219837	6.14692	7.9e-10	3.72e-09	XP_022853786.1	uncharacterized_LOC111375219,_transcript_variant_X3	Olive	PF02338:OTU-like_cysteine_protease	IPR011990:Tetratricopeptide-like helical domain superfamily//IPR002885:Pentatricopeptide repeat
LOC111410779	294.179	1.34865	2.54674	0.192733	6.99751	2.61e-12	1.47e-11	XP_022897075.1	cucumber_peeling_cupredoxin-like,_transcript_variant_X2	Olive	PF02298:Plastocyanin-like_domain
LOC111365240	282.353	1.34852	2.54651	0.21018	6.41602	1.4e-10	6.98e-10	XP_022841426.1	transcription_factor_DIVARICATA-like,_transcript_variant_X2	Olive	PF00249:Myb-like_DNA-binding_domain	IPR002100:Transcription factor, MADS-box//IPR033896:MADS MEF2-like//IPR002487:Transcription factor, K-box//IPR036879:Transcription factor, MADS-box superfamily
LOC111380129	60.6136	1.34836	2.54622	0.352291	3.8274	0.000129505	0.000347209		uncharacterized_LOC111380129	Olive
LOC111376113	189.64	1.34643	2.54283	0.378414	3.5581	0.000373553	0.000936416		uncharacterized_LOC111376113	Olive		IPR016140:Bifunctional inhibitor/plant lipid transfer protein/seed storage helical domain//IPR000528:Plant lipid transfer protein/Par allergen//IPR036312:Bifunctional inhibitor/plant lipid transfer protein/seed storage helical domain superfamily
LOC111401914	88.4639	1.34622	2.54245	0.299374	4.49678	6.9e-06	2.19e-05	XP_022885664.1	mitotic_spindle_checkpoint_protein_MAD2-like	Olive	PF02301:HORMA_domain
LOC111367206	127.129	1.34548	2.54115	0.282213	4.76762	1.86e-06	6.36e-06		uncharacterized_LOC111367206,_transcript_variant_X9	Olive		IPR033922:NAD(P) binding domain of glutamate dehydrogenase//IPR006095:Glutamate/phenylalanine/leucine/valine dehydrogenase//IPR006096:Glutamate/phenylalanine/leucine/valine dehydrogenase, C-terminal//IPR036291:NAD(P)-binding domain superfamily//IPR014362:Glutamate dehydrogenase//IPR033524:Leu/Phe/Val dehydrogenases active site
LOC111405742	80.7655	1.34403	2.53859	0.305456	4.40006	1.08e-05	3.34e-05	XP_022890534.1	serine/threonine-protein_kinase_Nek2-like	Olive	PF00069:Protein_kinase_domain	IPR017103:Ionotropic glutamate receptor, plant//IPR028082:Periplasmic binding protein-like I//IPR001320:Ionotropic glutamate receptor
LOC111367054	217.791	1.34141	2.53399	0.225464	5.94957	2.69e-09	1.21e-08	XP_022843513.1	zinc_transporter_11-like	Olive	PF02535:ZIP_Zinc_transporter	IPR014347:Tautomerase/MIF superfamily
LOC111378549	203.224	1.34075	2.53283	0.228369	5.87097	4.33e-09	1.92e-08	XP_022857552.1	increased_DNA_methylation_3-like,_transcript_variant_X9	Olive	PF00011:Hsp20/alpha_crystallin_family	IPR005647:Meiotic nuclear division protein 1
LOC111394517	116.023	1.33894	2.52965	0.303913	4.40566	1.05e-05	3.26e-05	XP_022876143.1	F-box_protein_GID2-like	Olive	PF12937:F-box-like
LOC111388915	58.898	1.33784	2.52773	0.358729	3.72939	0.000191942	0.000502703	XP_022869508.1	expansin-A6-like,_transcript_variant_X3	Olive	PF01357:Pollen_allergen//PF03330:Lytic_transglycolase	IPR028565:Mu homology domain//IPR036168:AP-2 complex subunit mu, C-terminal superfamily//IPR043512:Mu2, C-terminal domain//IPR001392:Clathrin adaptor, mu subunit
LOC111368650	114.382	1.33652	2.52542	0.292887	4.56327	5.04e-06	1.62e-05	XP_022845787.1	cell_division_control_protein_2_homolog_A-like,_transcript_variant_X2	Olive	PF00069:Protein_kinase_domain	IPR036576:WRKY domain superfamily//IPR003657:WRKY domain
LOC111409286	1369.93	1.33375	2.52057	0.157686	8.45826	2.71e-17	2.07e-16	XP_022895076.1	glucose-6-phosphate_1-dehydrogenase,_cytoplasmic_isoform,_transcript_variant_X3	Olive	PF02781:Glucose-6-phosphate_dehydrogenase,_C-terminal_domain//PF00479:Glucose-6-phosphate_dehydrogenase,_NAD_binding_domain	IPR011989:Armadillo-like helical//IPR012295:TBP domain superfamily//IPR016024:Armadillo-type fold//IPR013041:Clathrin adaptor, appendage, Ig-like subdomain superfamily//IPR009028:Coatomer/calthrin adaptor appendage, C-terminal subdomain//IPR037067:Coatomer, gamma subunit, appendage domain superfamily//IPR017106:Coatomer gamma subunit
LOC111376273	931.027	1.32403	2.50364	0.145306	9.11201	8.09e-20	6.98e-19	XP_022854988.1	probable_inactive_leucine-rich_repeat_receptor-like_protein_kinase_At3g03770	Olive	PF07714:Protein_tyrosine_kinase//PF08263:Leucine_rich_repeat_N-terminal_domain	IPR000719:Protein kinase domain//IPR011009:Protein kinase-like domain superfamily//IPR003591:Leucine-rich repeat, typical subtype//IPR032675:Leucine-rich repeat domain superfamily//IPR017441:Protein kinase, ATP binding site//IPR008271:Serine/threonine-protein kinase, active site
LOC111367943	162.6	1.32362	2.50293	0.24313	5.44407	5.21e-08	2.09e-07	XP_022844840.1	uncharacterized_LOC111367943	Olive		IPR000408:Regulator of chromosome condensation, RCC1//IPR009091:Regulator of chromosome condensation 1/beta-lactamase-inhibitor protein II//IPR000306:FYVE zinc finger//IPR013083:Zinc finger, RING/FYVE/PHD-type//IPR011993:PH-like domain superfamily//IPR011011:Zinc finger, FYVE/PHD-type//IPR017455:Zinc finger, FYVE-related
LOC111398222	400.374	1.31881	2.49461	0.204229	6.45751	1.06e-10	5.36e-10	XP_022880923.1	ferritin-3,_chloroplastic-like	Olive	PF00210:Ferritin-like_domain
LOC111411447	1423.05	1.31862	2.49428	0.112641	11.7064	1.18e-31	1.67e-30	XP_022897749.1	subtilisin-like_protease_SBT1.8	Olive	PF00082:Subtilase_family//PF05922:Peptidase_inhibitor_I9//PF17766:Fibronectin_type-III_domain//PF02225:PA_domain
LOC111385095	481.421	1.3167	2.49096	0.14882	8.84761	8.94e-19	7.32e-18	XP_022865229.1	receptor_protein_kinase_TMK1-like	Olive	PF13855:Leucine_rich_repeat//PF12799:Leucine_Rich_repeats_(2_copies)//PF00069:Protein_kinase_domain//PF08263:Leucine_rich_repeat_N-terminal_domain
LOC111407874	143.259	1.31609	2.4899	0.236459	5.56584	2.61e-08	1.08e-07	XP_022893337.1	cytochrome_B5-like_protein	Olive	PF00173:Cytochrome_b5-like_Heme/Steroid_binding_domain	IPR001047:Ribosomal protein S8e//IPR042563:Ribosomal protein S8e subdomain, eukaryotes
LOC111395775	58.6882	1.30985	2.47916	0.365259	3.58609	0.000335669	0.000847513	XP_022877692.1	uncharacterized_LOC111395775	Olive		IPR005225:Small GTP-binding protein domain//IPR027417:P-loop containing nucleoside triphosphate hydrolase
LOC111398935	66.4781	1.30716	2.47453	0.380414	3.43614	0.000590058	0.00143518	XP_022881871.1	DNA-3-methyladenine_glycosylase-like	Olive	PF03352:Methyladenine_glycosylase
LOC111391531	564.903	1.3014	2.46467	0.160003	8.13358	4.17e-16	2.97e-15	XP_022872533.1	fasciclin-like_arabinogalactan_protein_7,_transcript_variant_X3	Olive	PF02469:Fasciclin_domain
LOC111390451	298.089	1.30099	2.46398	0.174623	7.4503	9.31e-14	5.76e-13	XP_022871267.1	zinc_finger_protein_GIS3-like	Olive
LOC111370938	81.1309	1.30054	2.46321	0.320408	4.05901	4.93e-05	0.000140397	XP_022848612.1	protease_Do-like_5,_chloroplastic,_transcript_variant_X2	Olive	PF13365:Trypsin-like_peptidase_domain	IPR000182:GNAT domain//IPR016181:Acyl-CoA N-acyltransferase
LOC111372743	99.611	1.30051	2.46316	0.311462	4.1755	2.97e-05	8.69e-05	XP_022850903.1	protein_LIGHT-DEPENDENT_SHORT_HYPOCOTYLS_10-like	Olive	PF04852:Protein_of_unknown_function_(DUF640)
LOC111380859	425.329	1.29866	2.46001	0.172199	7.54165	4.64e-14	2.93e-13	XP_022860288.1	uncharacterized_LOC111380859	Olive
LOC111384793	835.717	1.29581	2.45515	0.162393	7.97948	1.47e-15	1.01e-14	XP_022864885.1	superoxide_dismutase_[Cu-Zn],_chloroplastic-like	Olive	PF00080:Copper/zinc_superoxide_dismutase_(SODC)
LOC111409710	184.303	1.29285	2.45011	0.22855	5.65673	1.54e-08	6.52e-08	XP_022895491.1	microtubule-associated_protein_RP/EB_family_member_1C	Olive	PF00307:Calponin_homology_(CH)_domain//PF03271:EB1-like_C-terminal_motif
LOC111367309	474.611	1.29229	2.44916	0.148806	8.68438	3.81e-18	3.02e-17	XP_022843887.1	O-fucosyltransferase_36-like	Olive	PF10250:GDP-fucose_protein_O-fucosyltransferase	IPR001736:Phospholipase D/Transphosphatidylase//IPR035892:C2 domain superfamily//IPR000008:C2 domain//IPR011402:Phospholipase D, plant
LOC111368897	72.2658	1.2858	2.43817	0.321978	3.99344	6.51e-05	0.000182432	XP_022846174.1	protein_RICE_SALT_SENSITIVE_3-like	Olive	PF14215:bHLH-MYC_and_R2R3-MYB_transcription_factors_N-terminal
LOC111407413	689.721	1.28498	2.43678	0.130035	9.88178	4.99e-23	4.99e-22	XP_022892632.1	delta-1-pyrroline-5-carboxylate_synthase-like,_transcript_variant_X2	Olive	PF00171:Aldehyde_dehydrogenase_family//PF00696:Amino_acid_kinase_family	IPR036770:Ankyrin repeat-containing domain superfamily//IPR001841:Zinc finger, RING-type//IPR020683:Ankyrin repeat-containing domain//IPR002110:Ankyrin repeat//IPR013083:Zinc finger, RING/FYVE/PHD-type
LOC111399482	140.295	1.28286	2.43321	0.344002	3.72921	0.000192078	0.00050298	XP_022882595.1	glucan_endo-1,3-beta-glucosidase_8-like	Olive	PF00332:Glycosyl_hydrolases_family_17//PF07983:X8_domain	IPR012337:Ribonuclease H-like superfamily//IPR036397:Ribonuclease H superfamily//IPR001584:Integrase, catalytic core
LOC111391172	363.719	1.27852	2.42589	0.161746	7.90444	2.69e-15	1.83e-14	XP_022872095.1	probable_methyltransferase_PMT7,_transcript_variant_X4	Olive	PF03141:Putative_S-adenosyl-L-methionine-dependent_methyltransferase
LOC111371637	224.996	1.27723	2.42373	0.215741	5.92017	3.22e-09	1.44e-08	XP_022849523.1	kinase-interacting_family_protein-like	Olive	PF07765:KIP1-like_protein	IPR011990:Tetratricopeptide-like helical domain superfamily
LOC111398855	396.145	1.27637	2.42229	0.154986	8.23541	1.79e-16	1.3e-15	XP_022881759.1	uncharacterized_LOC111398855,_transcript_variant_X5	Olive	PF10358:N-terminal_C2_in_EEIG1_and_EHBP1_proteins	IPR008942:ENTH/VHS//IPR006569:CID domain
LOC111409003	283.942	1.27572	2.42119	0.182101	7.00553	2.46e-12	1.39e-11	XP_022894659.1	probable_beta-D-xylosidase_6,_transcript_variant_X2	Olive	PF01915:Glycosyl_hydrolase_family_3_C-terminal_domain//PF00933:Glycosyl_hydrolase_family_3_N_terminal_domain	IPR000426:Proteasome alpha-subunit, N-terminal domain//IPR029055:Nucleophile aminohydrolases, N-terminal//IPR023332:Proteasome alpha-type subunit
LOC111406050	97.4437	1.27288	2.41643	0.300091	4.24164	2.22e-05	6.6e-05	XP_022891002.1	amino_acid_transporter_AVT6C-like,_transcript_variant_X2	Olive	PF01490:Transmembrane_amino_acid_transporter_protein	IPR009033:Calreticulin/calnexin, P domain superfamily//IPR018124:Calreticulin/calnexin, conserved site//IPR013320:Concanavalin A-like lectin/glucanase domain superfamily//IPR001580:Calreticulin/calnexin
LOC111368007	258.894	1.27127	2.41373	0.191457	6.63995	3.14e-11	1.64e-10	XP_022844935.1	kinesin-like_protein_KIN-13B,_transcript_variant_X2	Olive	PF00225:Kinesin_motor_domain	IPR032675:Leucine-rich repeat domain superfamily//IPR027417:P-loop containing nucleoside triphosphate hydrolase
LOC111375830	728.389	1.26821	2.40862	0.237238	5.34571	9.01e-08	3.52e-07	XP_022854510.1	classical_arabinogalactan_protein_9-like	Olive		IPR013083:Zinc finger, RING/FYVE/PHD-type//IPR011989:Armadillo-like helical//IPR016024:Armadillo-type fold//IPR003613:U box domain
LOC111388861	79.3083	1.2669	2.40644	0.344845	3.67382	0.000238948	0.000616971	XP_022869441.1	carotenoid_9,10(9',10')-cleavage_dioxygenase-like	Olive	PF03055:Retinal_pigment_epithelial_membrane_protein	IPR011035:Ribosomal protein L25/Gln-tRNA synthetase, anti-codon-binding domain superfamily//IPR020056:Ribosomal protein L25/Gln-tRNA synthetase, N-terminal//IPR037121:Ribosomal protein L25, C-terminal//IPR029751:Ribosomal protein L25
LOC111374813	76.6006	1.26548	2.40407	0.33128	3.81997	0.000133471	0.000357214		uncharacterized_LOC111374813,_transcript_variant_X2	Olive		IPR038538:MTERF superfamily, mitochondrial/chloroplastic//IPR003690:Transcription termination factor, mitochondrial/chloroplastic
LOC111410911	387.752	1.26532	2.40381	0.155875	8.11752	4.76e-16	3.37e-15	XP_022897276.1	uncharacterized_LOC111410911	Olive
LOC111381732	554.002	1.26403	2.40165	0.172398	7.33203	2.27e-13	1.37e-12	XP_022861313.1	homeobox-leucine_zipper_protein_HAT4-like	Olive	PF04618:HD-ZIP_protein_N_terminus//PF00046:Homeodomain//PF02183:Homeobox_associated_leucine_zipper	IPR008271:Serine/threonine-protein kinase, active site//IPR011009:Protein kinase-like domain superfamily//IPR000719:Protein kinase domain
LOC111411954	1180.1	1.26088	2.39643	0.131064	9.62034	6.56e-22	6.25e-21	XP_022898420.1	ubiquitin-60S_ribosomal_protein_L40	Olive	PF00240:Ubiquitin_family//PF01020:Ribosomal_L40e_family
LOC111377733	125.617	1.25919	2.39361	0.250015	5.03644	4.74e-07	1.73e-06	XP_022856629.1	ABC_transporter_B_family_member_15-like	Olive	PF00005:ABC_transporter//PF00664:ABC_transporter_transmembrane_region	IPR037282:F-actin-capping protein subunit alpha/beta//IPR042276:F-actin-capping protein subunit alpha/beta, domain 2//IPR001698:F-actin-capping protein subunit beta//IPR043175:F-actin-capping protein subunit beta, N-terminal domain//IPR019771:F-actin capping protein, beta subunit, conserved site
LOC111366292	126.061	1.25736	2.39058	0.255053	4.9298	8.23e-07	2.91e-06	XP_022842789.1	60S_acidic_ribosomal_protein_P3-like,_transcript_variant_X2	Olive	PF00428:60s_Acidic_ribosomal_protein
LOC111397157	856.697	1.25657	2.38927	0.158188	7.94352	1.97e-15	1.35e-14	XP_022879685.1	probable_inactive_receptor_kinase_At1g48480	Olive	PF00069:Protein_kinase_domain//PF08263:Leucine_rich_repeat_N-terminal_domain	IPR041846:Early nodulin-like protein domain//IPR008972:Cupredoxin//IPR003245:Phytocyanin domain
LOC111402549	487.346	1.25556	2.38761	0.152844	8.21469	2.13e-16	1.54e-15	XP_022886701.1	TPR_repeat-containing_thioredoxin_TTL1-like	Olive	PF07719:Tetratricopeptide_repeat//PF13432:Tetratricopeptide_repeat//PF00085:Thioredoxin	IPR036612:K Homology domain, type 1 superfamily//IPR004087:K Homology domain
LOC111377194	47807.8	1.25509	2.38683	0.138242	9.07898	1.1e-19	9.4e-19	XP_022856025.1	5'-methylthioadenosine/S-adenosylhomocysteine_nucleosidase-like	Olive	PF01048:Phosphorylase_superfamily
LOC111403809	128.701	1.25301	2.38339	0.245919	5.09522	3.48e-07	1.28e-06	XP_022888197.1	uncharacterized_LOC111403809	Olive
LOC111375465	2439.36	1.25217	2.382	0.148971	8.40546	4.26e-17	3.22e-16	XP_022854059.1	endoglucanase_6-like	Olive	PF09478:Carbohydrate_binding_domain_CBM49//PF00759:Glycosyl_hydrolase_family_9	IPR013785:Aldolase-type TIM barrel//IPR027492:Dual-specificity RNA methyltransferase RlmN//IPR004383:Ribosomal RNA large subunit methyltransferase RlmN/Cfr
LOC111373315	328.174	1.25144	2.38079	0.181077	6.91109	4.81e-12	2.67e-11	XP_022851594.1	coiled-coil_domain-containing_protein_SCD2	Olive		IPR036420:BRCT domain superfamily//IPR001357:BRCT domain//IPR001841:Zinc finger, RING-type//IPR017907:Zinc finger, RING-type, conserved site//IPR013083:Zinc finger, RING/FYVE/PHD-type//IPR034732:Extended PHD (ePHD) domain
LOC111396120	400.403	1.25087	2.37986	0.165813	7.54389	4.56e-14	2.88e-13	XP_022878199.1	ADP-ribosylation_factor_GTPase-activating_protein_AGD3-like,_transcript_variant_X4	Olive	PF13637:Ankyrin_repeats_(many_copies)//PF16746:BAR_domain_of_APPL_family//PF01412:Putative_GTPase_activating_protein_for_Arf//PF00169:PH_domain	IPR027483:Phosphatidylinositol-4-phosphate 5-kinase, C-terminal//IPR002498:Phosphatidylinositol-4-phosphate 5-kinase, core//IPR017163:Phosphatidylinositol-4-phosphate 5-kinase, plant//IPR027484:Phosphatidylinositol-4-phosphate 5-kinase, N-terminal//IPR003409:MORN motif
LOC111375382	887.95	1.24907	2.37689	0.124218	10.0555	8.69e-24	8.97e-23	XP_022853968.1	shikimate_O-hydroxycinnamoyltransferase,_transcript_variant_X4	Olive	PF02458:Transferase_family
LOC111391488	101.235	1.24834	2.37568	0.334298	3.73422	0.0001883	0.000493817	XP_022872487.1	uncharacterized_LOC111391488	Olive		IPR002347:Short-chain dehydrogenase/reductase SDR//IPR036291:NAD(P)-binding domain superfamily
LOC111365416	310.265	1.24783	2.37485	0.327037	3.81558	0.000135864	0.000363296	XP_022841709.1	uncharacterized_LOC111365416	Olive
LOC111376932	136.891	1.24695	2.37338	0.266984	4.67049	3e-06	9.95e-06	XP_022855714.1	nitrate_regulatory_gene2_protein	Olive	PF04783:Protein_of_unknown_function_(DUF630)//PF04782:Protein_of_unknown_function_(DUF632)
LOC111367487	235.626	1.24579	2.37148	0.210168	5.92759	3.07e-09	1.38e-08	XP_022844160.1	probable_rhamnogalacturonate_lyase_B	Olive	PF14686:Polysaccharide_lyase_family_4,_domain_II//PF06045:Rhamnogalacturonate_lyase_family//PF14683:Polysaccharide_lyase_family_4,_domain_III
LOC111393267	290.904	1.24464	2.36959	0.197439	6.3039	2.9e-10	1.41e-09	XP_022874487.1	uncharacterized_LOC111393267,_transcript_variant_X2	Olive	PF13837:Myb/SANT-like_DNA-binding_domain	IPR001876:Zinc finger, RanBP2-type//IPR036443:Zinc finger, RanBP2-type superfamily
LOC111411161	771.653	1.24305	2.36699	0.173105	7.18093	6.92e-13	4.05e-12			Olive		IPR023210:NADP-dependent oxidoreductase domain//IPR036812:NADP-dependent oxidoreductase domain superfamily
LOC111375625	1353.12	1.23698	2.35705	0.118876	10.4057	2.34e-25	2.58e-24	XP_022854248.1	putative_12-oxophytodienoate_reductase_11,_transcript_variant_X2	Olive	PF00724:NADH:flavin_oxidoreductase_/_NADH_oxidase_family
LOC111390907	89.5241	1.23648	2.35623	0.315937	3.91368	9.09e-05	0.000249554	XP_022871795.1	protein_WHAT'S_THIS_FACTOR_1_homolog,_transcript_variant_X2	Olive	PF11955:Plant_organelle_RNA_recognition_domain	IPR036227:Ribosomal L18e/L15P superfamily//IPR001196:Ribosomal protein L15, conserved site//IPR030878:Ribosomal protein L15//IPR005749:Ribosomal protein L15, bacterial-type
LOC111397477	248.445	1.23582	2.35516	0.191471	6.45438	1.09e-10	5.47e-10	XP_022880195.1	uncharacterized_LOC111397477	Olive	PF01190:Pollen_proteins_Ole_e_I_like	IPR030374:Polyamine biosynthesis domain//IPR001045:Spermidine/spermine synthases//IPR029063:S-adenosyl-L-methionine-dependent methyltransferase//IPR037163:Spermidine synthase, tetramerisation domain superfamily
LOC111381753	129.193	1.23542	2.3545	0.244459	5.0537	4.33e-07	1.58e-06	XP_022861333.1	uncharacterized_LOC111381753	Olive	PF03352:Methyladenine_glycosylase
LOC111403935	1034.39	1.23524	2.35421	0.132325	9.33491	1.01e-20	9.04e-20	XP_022888383.1	probable_inactive_receptor_kinase_At5g58300,_transcript_variant_X6	Olive	PF08263:Leucine_rich_repeat_N-terminal_domain//PF00069:Protein_kinase_domain
LOC111402182	499.083	1.23193	2.34881	0.145215	8.4835	2.19e-17	1.67e-16	XP_022886102.1	apoptosis_inhibitor_5-like_protein_API5,_transcript_variant_X4	Olive	PF05918:Apoptosis_inhibitory_protein_5_(API5)
LOC111388675	54.8897	1.22478	2.3372	0.365524	3.35074	0.000805952	0.00192193	XP_022869204.1	protein_IQ-DOMAIN_14-like	Olive	PF13178:Protein_of_unknown_function_(DUF4005)//PF00612:IQ_calmodulin-binding_motif	IPR004037:Ribosomal protein L7Ae conserved site//IPR001921:Ribosomal protein L7A/L8//IPR018492:Ribosomal protein L7Ae/L8/Nhp2 family//IPR038524:Ribosomal protein L7A/L8 superfamily//IPR029064:50S ribosomal protein L30e-like
LOC111409904	322.823	1.22368	2.33542	0.16679	7.33667	2.19e-13	1.32e-12	XP_022895780.1	O-fucosyltransferase_27-like	Olive	PF10250:GDP-fucose_protein_O-fucosyltransferase	IPR034687:Elongator complex protein 3-like//IPR023404:Radical SAM, alpha/beta horseshoe//IPR000182:GNAT domain//IPR006638:Elp3/MiaB/NifB//IPR016181:Acyl-CoA N-acyltransferase
LOC111372502	99.5492	1.2236	2.33528	0.274726	4.45388	8.43e-06	2.65e-05	XP_022850619.1	probable_glucuronoxylan_glucuronosyltransferase_IRX7	Olive	PF03016:Exostosin_family
LOC111411782	325.46	1.2231	2.33447	0.185437	6.59574	4.23e-11	2.19e-10	XP_022898148.1	transcription_factor_TCP8-like	Olive	PF03634:TCP_family_transcription_factor
LOC111381379	100.458	1.22305	2.3344	0.275591	4.43792	9.08e-06	2.84e-05		uncharacterized_LOC111381379,_transcript_variant_X6	Olive		IPR036396:Cytochrome P450 superfamily//IPR002401:Cytochrome P450, E-class, group I//IPR001128:Cytochrome P450
LOC111395168	300.092	1.22187	2.33248	0.17182	7.11131	1.15e-12	6.64e-12	XP_022876941.1	rho_GTPase-activating_protein_2-like	Olive	PF00620:RhoGAP_domain	IPR001611:Leucine-rich repeat//IPR027417:P-loop containing nucleoside triphosphate hydrolase//IPR032675:Leucine-rich repeat domain superfamily//IPR038005:Virus X resistance protein-like, coiled-coil domain
LOC111374157	162.225	1.22177	2.33233	0.256462	4.76395	1.9e-06	6.47e-06		magnesium_protoporphyrin_IX_methyltransferase,_chloroplastic-like	Olive
LOC111372428	99.6584	1.22086	2.33086	0.286911	4.25521	2.09e-05	6.23e-05		uncharacterized_LOC111372428	Olive		IPR008271:Serine/threonine-protein kinase, active site//IPR017441:Protein kinase, ATP binding site//IPR011009:Protein kinase-like domain superfamily//IPR000719:Protein kinase domain
LOC111405004	68.4617	1.21957	2.32877	0.358297	3.40379	0.000664574	0.00160286	XP_022889489.1	pectinesterase_inhibitor_3-like	Olive	PF04043:Plant_invertase/pectin_methylesterase_inhibitor	IPR036049:Ribosomal protein L29/L35 superfamily//IPR001854:Ribosomal protein L29/L35
LOC111402973	215.676	1.21926	2.32827	0.204753	5.95478	2.6e-09	1.18e-08	XP_022887075.1	uncharacterized_LOC111402973	Olive	PF04784:Protein_of_unknown_function,_DUF547	IPR029058:Alpha/Beta hydrolase fold
LOC111393678	622.975	1.21844	2.32695	0.148961	8.17957	2.85e-16	2.05e-15	XP_022875102.1	protein_WVD2-like_3,_transcript_variant_X4	Olive	PF06886:Targeting_protein_for_Xklp2_(TPX2)
LOC111390638	122.521	1.21804	2.3263	0.251515	4.8428	1.28e-06	4.44e-06	XP_022871471.1	uncharacterized_LOC111390638,_transcript_variant_X9	Olive
LOC111369826	292.359	1.21663	2.32403	0.173689	7.00466	2.48e-12	1.4e-11	XP_022847264.1	zinc_finger_CCCH_domain-containing_protein_32-like,_transcript_variant_X3	Olive	PF00642:Zinc_finger_C-x8-C-x5-C-x3-H_type_(and_similar)
LOC111368468	65.6227	1.21594	2.32292	0.343676	3.53805	0.000403093	0.00100552	XP_022845480.1	squamosa_promoter-binding_protein_1-like	Olive	PF03110:SBP_domain	IPR043502:DNA/RNA polymerase superfamily
LOC111399127	67.3705	1.21455	2.32068	0.34189	3.55246	0.000381652	0.000956007		uncharacterized_LOC111399127,_transcript_variant_X3	Olive		IPR037069:Acyl-CoA dehydrogenase/oxidase, N-terminal domain superfamily//IPR036250:Acyl-CoA dehydrogenase-like, C-terminal//IPR006089:Acyl-CoA dehydrogenase, conserved site//IPR009100:Acyl-CoA dehydrogenase/oxidase, N-terminal and middle domain superfamily
LOC111370526	117.227	1.21249	2.31737	0.28119	4.31198	1.62e-05	4.89e-05	XP_022848015.1	receptor-like_protein_51	Olive	PF13855:Leucine_rich_repeat	IPR002885:Pentatricopeptide repeat//IPR011990:Tetratricopeptide-like helical domain superfamily
LOC111382908	4186.08	1.21218	2.31687	0.131179	9.24061	2.45e-20	2.16e-19	XP_022862710.1	chlorophyll_a-b_binding_protein_7,_chloroplastic-like	Olive	PF00504:Chlorophyll_A-B_binding_protein
LOC111389012	190.401	1.21194	2.31649	0.215567	5.62211	1.89e-08	7.89e-08	XP_022869624.1	probable_LRR_receptor-like_serine/threonine-protein_kinase_At1g63430	Olive	PF07714:Protein_tyrosine_kinase
LOC111377345	567.099	1.20982	2.31309	0.142255	8.50459	1.82e-17	1.4e-16		chloroplast_stem-loop_binding_protein_of_41_kDa_a,_chloroplastic	Olive
LOC111372095	85.5272	1.20893	2.31165	0.294189	4.10934	3.97e-05	0.000114337	XP_022850033.1	PLASMODESMATA_CALLOSE-BINDING_PROTEIN_5-like	Olive	PF07983:X8_domain
LOC111406258	251.928	1.20828	2.31062	0.187912	6.43004	1.28e-10	6.39e-10	XP_022891338.1	glyoxylate/succinic_semialdehyde_reductase_2,_chloroplastic	Olive	PF14833:NAD-binding_of_NADP-dependent_3-hydroxyisobutyrate_dehydrogenase//PF03446:NAD_binding_domain_of_6-phosphogluconate_dehydrogenase
LOC111388894	1397.49	1.2082	2.31049	0.209339	5.77151	7.86e-09	3.4e-08		uncharacterized_LOC111388894	Olive
LOC111411663	218.686	1.20777	2.30981	0.225451	5.35715	8.45e-08	3.31e-07	XP_022897984.1	uncharacterized_LOC111411663,_transcript_variant_X5	Olive
LOC111410115	1723.21	1.20772	2.30972	0.121592	9.93256	3e-23	3.03e-22	XP_022896089.1	subtilisin-like_protease_SBT1.6	Olive	PF05922:Peptidase_inhibitor_I9//PF17766:Fibronectin_type-III_domain//PF00082:Subtilase_family//PF02225:PA_domain	IPR000305:GIY-YIG endonuclease//IPR035901:GIY-YIG endonuclease superfamily
LOC111396639	250.004	1.20656	2.30786	0.236187	5.10849	3.25e-07	1.2e-06	XP_022878840.1	probable_aldo-keto_reductase_3,_transcript_variant_X2	Olive	PF00248:Aldo/keto_reductase_family	IPR006580:Zinc finger, TTF-type//IPR012337:Ribonuclease H-like superfamily
LOC111375884	594.928	1.20195	2.3005	0.137829	8.72055	2.77e-18	2.21e-17	XP_022854564.1	sulfite_exporter_TauE/SafE_family_protein_3-like	Olive	PF01925:Sulfite_exporter_TauE/SafE	IPR029058:Alpha/Beta hydrolase fold
LOC111368474	298.527	1.20147	2.29974	0.186929	6.42743	1.3e-10	6.49e-10	XP_022845528.1	uncharacterized_membrane_protein_At1g16860-like,_transcript_variant_X5	Olive		IPR019734:Tetratricopeptide repeat//IPR011990:Tetratricopeptide-like helical domain superfamily//IPR006636:Heat shock chaperonin-binding//IPR013026:Tetratricopeptide repeat-containing domain
LOC111393769	251.32	1.20008	2.29753	0.233326	5.14337	2.7e-07	1.01e-06	XP_022875233.1	transcription_factor_bHLH78-like	Olive	PF00010:Helix-loop-helix_DNA-binding_domain	IPR010908:Longin domain//IPR042855:v-SNARE, coiled-coil homology domain//IPR011012:Longin-like domain superfamily
LOC111399076	66.8128	1.19723	2.29299	0.343553	3.48484	0.000492423	0.00121182	XP_022882065.1	NAD(P)H-quinone_oxidoreductase_subunit_L,_chloroplastic	Olive	PF10716:NADH_dehydrogenase_transmembrane_subunit	IPR003891:Initiation factor eIF-4 gamma, MA3//IPR016024:Armadillo-type fold//IPR016021:MIF4G-like domain superfamily
LOC111404290	175.44	1.19655	2.29191	0.221786	5.39508	6.85e-08	2.71e-07		uncharacterized_LOC111404290,_transcript_variant_X3	Olive		IPR036249:Thioredoxin-like superfamily
LOC111393336	389.544	1.19298	2.28625	0.191981	6.21407	5.16e-10	2.47e-09	XP_022874601.1	uncharacterized_LOC111393336,_transcript_variant_X2	Olive	PF14309:Domain_of_unknown_function_(DUF4378)//PF12552:Protein_of_unknown_function_(DUF3741)	IPR011990:Tetratricopeptide-like helical domain superfamily
LOC111373148	331.045	1.19191	2.28455	0.170858	6.97603	3.04e-12	1.71e-11	XP_022851398.1	transmembrane_9_superfamily_member_5	Olive	PF02990:Endomembrane_protein_70
LOC111374641	278.081	1.19056	2.28242	0.177334	6.71367	1.9e-11	1.01e-10	XP_022853115.1	SHUGOSHIN_2-like	Olive	PF07557:Shugoshin_C_terminus
LOC111401692	513.403	1.18997	2.28147	0.236588	5.0297	4.91e-07	1.79e-06	XP_022885321.1	gibberellin-regulated_protein_14-like	Olive	PF02704:Gibberellin_regulated_protein	IPR002885:Pentatricopeptide repeat//IPR011990:Tetratricopeptide-like helical domain superfamily
LOC111378155	547.999	1.18868	2.27944	0.142004	8.37072	5.73e-17	4.29e-16	XP_022857090.1	probable_plastid-lipid-associated_protein_8,_chloroplastic	Olive	PF04755:PAP_fibrillin	IPR012677:Nucleotide-binding alpha-beta plait domain superfamily//IPR000504:RNA recognition motif domain//IPR035979:RNA-binding domain superfamily//IPR036875:Zinc finger, CCHC-type superfamily//IPR001878:Zinc finger, CCHC-type
LOC111367867	143.052	1.18856	2.27925	0.23384	5.08278	3.72e-07	1.37e-06	XP_022844710.1	nodulation_protein_H,_transcript_variant_X2	Olive	PF00685:Sulfotransferase_domain	IPR002401:Cytochrome P450, E-class, group I//IPR036396:Cytochrome P450 superfamily//IPR001128:Cytochrome P450//IPR017972:Cytochrome P450, conserved site
LOC111379283	387.812	1.188	2.27836	0.187039	6.3516	2.13e-10	1.05e-09	XP_022858409.1	protein_DETOXIFICATION_45,_chloroplastic	Olive	PF01554:MatE	IPR032710:NTF2-like domain superfamily
LOC111386344	236.844	1.18698	2.27676	0.18719	6.34106	2.28e-10	1.12e-09	XP_022866575.1	CTL-like_protein_DDB_G0274487	Olive	PF04515:Plasma-membrane_choline_transporter
LOC111398611	104.961	1.18633	2.27573	0.272495	4.35357	1.34e-05	4.09e-05	XP_022881373.1	uncharacterized_LOC111398611,_transcript_variant_X2	Olive	PF03980:Nnf1
LOC111378616	1084.49	1.18338	2.27108	0.157504	7.51333	5.76e-14	3.61e-13	XP_022857614.1	probable_galactinol--sucrose_galactosyltransferase_1	Olive	PF05691:Raffinose_synthase_or_seed_imbibition_protein_Sip1	IPR011761:ATP-grasp fold//IPR008656:Inositol-tetrakisphosphate 1-kinase
LOC111383576	13349.6	1.17546	2.25865	0.158195	7.43048	1.08e-13	6.66e-13	XP_022863458.1	GDP-mannose_3,5-epimerase_2	Olive	PF01370:NAD_dependent_epimerase/dehydratase_family	IPR001660:Sterile alpha motif domain//IPR013761:Sterile alpha motif/pointed domain superfamily
LOC111411846	2166.89	1.17396	2.2563	0.22831	5.14194	2.72e-07	1.01e-06	XP_022898246.1	photosystem_II_reaction_center_W_protein,_chloroplastic-like	Olive	PF07123:Photosystem_II_reaction_centre_W_protein_(PsbW)
LOC111382510	85.4894	1.17279	2.25447	0.321576	3.64701	0.00026531	0.000680235		GATA_transcription_factor_26-like	Olive		IPR024060:Ureidoglycolate lyase domain superfamily//IPR011051:RmlC-like cupin domain superfamily
LOC111411711	1623.32	1.17244	2.25393	0.246568	4.75504	1.98e-06	6.75e-06	XP_022898045.1	uncharacterized_LOC111411711,_transcript_variant_X2	Olive	PF04667:cAMP-regulated_phosphoprotein/endosulfine_conserved_region	IPR015421:Pyridoxal phosphate-dependent transferase, major domain//IPR015422:Pyridoxal phosphate-dependent transferase domain 1//IPR001085:Serine hydroxymethyltransferase//IPR019798:Serine hydroxymethyltransferase, pyridoxal phosphate binding site//IPR015424:Pyridoxal phosphate-dependent transferase
LOC111386341	122.611	1.17221	2.25356	0.282586	4.14813	3.35e-05	9.75e-05		uncharacterized_protein_LOC111386341	Olive		IPR000679:Zinc finger, GATA-type//IPR016679:Transcription factor, GATA, plant//IPR013088:Zinc finger, NHR/GATA-type
LOC111403790	92.9699	1.16908	2.24868	0.298423	3.91752	8.95e-05	0.000245937		uncharacterized_LOC111403790	Olive
LOC111370927	531.068	1.16747	2.24617	0.169079	6.90487	5.03e-12	2.78e-11	XP_022848600.1	urease_accessory_protein_G	Olive	PF02492:CobW/HypB/UreG,_nucleotide-binding_domain
LOC111395675	2803.86	1.16607	2.24399	0.130062	8.96546	3.09e-19	2.58e-18	XP_022877551.1	(-)-germacrene_D_synthase-like	Olive	PF01397:Terpene_synthase,_N-terminal_domain//PF03936:Terpene_synthase_family,_metal_binding_domain
LOC111410085	553.451	1.16526	2.24274	0.140158	8.31391	9.26e-17	6.84e-16	XP_022896035.1	kinesin-like_protein_KIN-7D,_mitochondrial,_transcript_variant_X2	Olive	PF13920:Zinc_finger,_C3HC4_type_(RING_finger)//PF00225:Kinesin_motor_domain	IPR017907:Zinc finger, RING-type, conserved site//IPR013083:Zinc finger, RING/FYVE/PHD-type//IPR001841:Zinc finger, RING-type
LOC111394434	1762.23	1.16143	2.23679	0.110011	10.5574	4.7e-26	5.32e-25	XP_022876028.1	jasmonate_O-methyltransferase-like	Olive	PF03492:SAM_dependent_carboxyl_methyltransferase	IPR003441:NAC domain//IPR036093:NAC domain superfamily
LOC111370504	153.105	1.16125	2.2365	0.252549	4.5981	4.26e-06	1.39e-05	XP_022847990.1	ras-related_protein_RABA1c	Olive	PF00071:Ras_family	IPR036181:MIT domain superfamily//IPR007330:MIT//IPR027417:P-loop containing nucleoside triphosphate hydrolase
LOC111367230	679.282	1.15721	2.23026	0.150432	7.69258	1.44e-14	9.41e-14	XP_022843755.1	BTB/POZ_domain-containing_protein_At5g67385-like	Olive	PF03000:NPH3_family//PF00651:BTB/POZ_domain	IPR020831:Glyceraldehyde/Erythrose phosphate dehydrogenase family//IPR036291:NAD(P)-binding domain superfamily//IPR006424:Glyceraldehyde-3-phosphate dehydrogenase, type I//IPR020828:Glyceraldehyde 3-phosphate dehydrogenase, NAD(P) binding domain//IPR020830:Glyceraldehyde 3-phosphate dehydrogenase, active site
LOC111381877	99.1119	1.15656	2.22925	0.314959	3.67209	0.000240575	0.00062084		uncharacterized_LOC111381877	Olive		IPR011684:Protein Networked (NET), actin-binding (NAB) domain
LOC111369775	216.255	1.15477	2.22649	0.206385	5.59522	2.2e-08	9.15e-08	XP_022847179.1	glycine_oxidase,_transcript_variant_X2	Olive	PF01266:FAD_dependent_oxidoreductase	IPR001841:Zinc finger, RING-type//IPR013083:Zinc finger, RING/FYVE/PHD-type//IPR017907:Zinc finger, RING-type, conserved site
LOC111405194	90.6179	1.15469	2.22637	0.295057	3.91345	9.1e-05	0.000249751	XP_022889738.1	probable_WRKY_transcription_factor_40	Olive	PF03106:WRKY_DNA_-binding_domain
LOC111394457	105.276	1.15417	2.22556	0.352419	3.27499	0.00105666	0.00246833	XP_022876058.1	filament-like_plant_protein_4	Olive	PF05911:Filament-like_plant_protein,_long_coiled-coil
LOC111398681	143.764	1.15326	2.22415	0.23419	4.92444	8.46e-07	2.99e-06	XP_022881480.1	uncharacterized_LOC111398681	Olive	PF05553:Cotton_fibre_expressed_protein//PF14364:Domain_of_unknown_function_(DUF4408)	IPR001932:PPM-type phosphatase domain//IPR036457:PPM-type phosphatase domain superfamily
LOC111412470	101.1	1.15194	2.22212	0.274414	4.19781	2.7e-05	7.93e-05	XP_022899171.1	acyl_transferase_4	Olive	PF02458:Transferase_family	IPR001948:Peptidase M18//IPR023358:Peptidase M18, domain 2
LOC111393060	182.777	1.15007	2.21925	0.235894	4.87537	1.09e-06	3.8e-06	XP_022874228.1	VAN3-binding_protein-like	Olive	PF05703:Auxin_canalisation//PF08458:Plant_pleckstrin_homology-like_region	IPR015940:Ubiquitin-associated domain//IPR009060:UBA-like superfamily//IPR000569:HECT domain//IPR016024:Armadillo-type fold//IPR035983:HECT, E3 ligase catalytic domain//IPR003903:Ubiquitin interacting motif//IPR011989:Armadillo-like helical
LOC111395951	107.78	1.14909	2.21774	0.276933	4.14935	3.33e-05	9.7e-05	XP_022877987.1	uncharacterized_LOC111395951	Olive	PF14368:Probable_lipid_transfer	IPR016300:Arsenical pump ATPase, ArsA/GET3//IPR027417:P-loop containing nucleoside triphosphate hydrolase
LOC111392342	162.823	1.14667	2.21403	0.228301	5.02264	5.1e-07	1.85e-06	XP_022873433.1	uncharacterized_LOC111392342	Olive	PF12348:CLASP_N_terminal	IPR036457:PPM-type phosphatase domain superfamily//IPR001932:PPM-type phosphatase domain
LOC111397286	560.353	1.14618	2.21327	0.136199	8.41547	3.91e-17	2.96e-16	XP_022879899.1	subtilisin-like_protease_SBT1.9	Olive	PF05922:Peptidase_inhibitor_I9//PF00082:Subtilase_family//PF17766:Fibronectin_type-III_domain	IPR001932:PPM-type phosphatase domain//IPR000222:PPM-type phosphatase, divalent cation binding//IPR036457:PPM-type phosphatase domain superfamily
LOC111371747	722.982	1.1448	2.21116	0.14116	8.10995	5.06e-16	3.59e-15	XP_022849655.1	2-keto-3-deoxy-L-rhamnonate_aldolase-like	Olive	PF03328:HpcH/HpaI_aldolase/citrate_lyase_family	IPR036093:NAC domain superfamily//IPR003441:NAC domain
LOC111366809	262.721	1.13466	2.19567	0.181864	6.23907	4.4e-10	2.11e-09	XP_022843272.1	subtilisin-like_protease_SBT1.7	Olive	PF05922:Peptidase_inhibitor_I9//PF17766:Fibronectin_type-III_domain//PF00082:Subtilase_family	IPR020846:Major facilitator superfamily domain//IPR036259:MFS transporter superfamily
LOC111408893	159.621	1.1333	2.1936	0.221419	5.11835	3.08e-07	1.14e-06	XP_022894490.1	aspartic_proteinase-like_protein_1	Olive	PF14541:Xylanase_inhibitor_C-terminal//PF14543:Xylanase_inhibitor_N-terminal
LOC111374679	220.447	1.13276	2.19278	0.197285	5.74173	9.37e-09	4.03e-08	XP_022853156.1	peptidyl-tRNA_hydrolase_2,_mitochondrial-like,_transcript_variant_X5	Olive	PF01981:Peptidyl-tRNA_hydrolase_PTH2
LOC111371603	329.347	1.13131	2.19057	0.172542	6.55671	5.5e-11	2.83e-10	XP_022849438.1	E3_ubiquitin-protein_ligase_BRE1A-like	Olive
LOC111399707	140.748	1.13067	2.18961	0.244614	4.62227	3.8e-06	1.24e-05	XP_022882939.1	solute_carrier_family_35_member_F2-like,_transcript_variant_X5	Olive	PF06027:Solute_carrier_family_35
LOC111372494	211.111	1.12985	2.18835	0.306557	3.6856	0.000228166	0.000591128	XP_022850612.1	cyclin-dependent_kinases_regulatory_subunit_1-like	Olive	PF01111:Cyclin-dependent_kinase_regulatory_subunit
LOC111403549	119.364	1.12814	2.18576	0.305706	3.69027	0.00022402	0.000580925	XP_022887868.1	alpha_carbonic_anhydrase_8-like	Olive		IPR027410:TCP-1-like chaperonin intermediate domain superfamily//IPR012720:T-complex protein 1, eta subunit//IPR027413:GroEL-like equatorial domain superfamily//IPR002194:Chaperonin TCP-1, conserved site//IPR027409:GroEL-like apical domain superfamily//IPR017998:Chaperone tailless complex polypeptide 1 (TCP-1)
LOC111389089	87.8031	1.12703	2.18408	0.306571	3.67623	0.000236703	0.000611833		uncharacterized_LOC111389089,_transcript_variant_X3	Olive
LOC111412353	218.801	1.12642	2.18316	0.2174	5.1813	2.2e-07	8.28e-07	XP_022899017.1	dihydroceramide_fatty_acyl_2-hydroxylase_FAH1-like	Olive	PF04116:Fatty_acid_hydroxylase_superfamily	IPR036259:MFS transporter superfamily
LOC111408464	209.366	1.12548	2.18175	0.219201	5.13449	2.83e-07	1.05e-06	XP_022893986.1	V-type_proton_ATPase_subunit_H-like	Olive	PF03224:V-ATPase_subunit_H//PF11698:V-ATPase_subunit_H	IPR042099:AMP-dependent synthetase-like superfamily//IPR020845:AMP-binding, conserved site
LOC111399904	707.598	1.12495	2.18094	0.176855	6.36088	2.01e-10	9.91e-10	XP_022883160.1	oxysterol-binding_protein-related_protein_3C	Olive	PF01237:Oxysterol-binding_protein
LOC111402238	178.161	1.11965	2.17295	0.235425	4.75589	1.98e-06	6.72e-06	XP_022886171.1	katanin_p60_ATPase-containing_subunit_A-like_2	Olive	PF00004:ATPase_family_associated_with_various_cellular_activities_(AAA)//PF17862:AAA+_lid_domain
LOC111398782	252.278	1.10978	2.15812	0.189136	5.86762	4.42e-09	1.96e-08	XP_022881641.1	protein_TORNADO_2,_transcript_variant_X2	Olive	PF00335:Tetraspanin_family	IPR001611:Leucine-rich repeat//IPR032675:Leucine-rich repeat domain superfamily//IPR008271:Serine/threonine-protein kinase, active site//IPR003591:Leucine-rich repeat, typical subtype//IPR011009:Protein kinase-like domain superfamily//IPR000719:Protein kinase domain
LOC111387753	317.046	1.10831	2.15594	0.173156	6.40067	1.55e-10	7.69e-10			Olive
LOC111402037	210.715	1.10744	2.15462	0.197861	5.59704	2.18e-08	9.06e-08	XP_022885839.1	uncharacterized_LOC111402037,_transcript_variant_X2	Olive		IPR003657:WRKY domain//IPR036576:WRKY domain superfamily
LOC111390115	409.834	1.10289	2.14784	0.206534	5.33998	9.3e-08	3.63e-07	XP_022870882.1	LIM_domain-containing_protein_WLIM1-like,_transcript_variant_X2	Olive	PF00412:LIM_domain	IPR011053:Single hybrid motif
LOC111372992	775.39	1.102	2.14651	0.126384	8.71942	2.8e-18	2.23e-17	XP_022851198.1	probable_BOI-related_E3_ubiquitin-protein_ligase_3	Olive	PF13920:Zinc_finger,_C3HC4_type_(RING_finger)	IPR005716:Ribosomal protein S5/S7, eukaryotic/archaeal//IPR020606:Ribosomal protein S7, conserved site//IPR036823:Ribosomal protein S7 domain superfamily//IPR000235:Ribosomal protein S5/S7
LOC111394387	619.26	1.09997	2.1435	0.136937	8.03267	9.54e-16	6.65e-15	XP_022875950.1	dihydrolipoyllysine-residue_acetyltransferase_component_5_of_pyruvate_dehydrogenase_complex,_chloroplastic-like	Olive	PF02817:e3_binding_domain//PF00198:2-oxoacid_dehydrogenases_acyltransferase_(catalytic_domain)//PF00364:Biotin-requiring_enzyme
LOC111378809	16448.1	1.09863	2.14151	0.142965	7.68462	1.53e-14	1e-13	XP_022857847.1	5-methyltetrahydropteroyltriglutamate--homocysteine_methyltransferase,_transcript_variant_X2	Olive	PF01717:Cobalamin-independent_synthase,_Catalytic_domain//PF08267:Cobalamin-independent_synthase,_N-terminal_domain	IPR002885:Pentatricopeptide repeat//IPR011990:Tetratricopeptide-like helical domain superfamily
LOC111390908	597.738	1.09778	2.14026	0.142023	7.72961	1.08e-14	7.09e-14	XP_022871796.1	ribulose_bisphosphate_carboxylase_small_chain_clone_512-like	Olive	PF00101:Ribulose_bisphosphate_carboxylase,_small_chain
LOC111367765	335.501	1.09685	2.13887	0.185196	5.92264	3.17e-09	1.42e-08	XP_022844585.1	CSC1-like_protein_At1g32090,_transcript_variant_X2	Olive	PF14703:Cytosolic_domain_of_10TM_putative_phosphate_transporter//PF02714:Calcium-dependent_channel,_7TM_region,_putative_phosphate
LOC111403099	461.146	1.09446	2.13533	0.148115	7.38928	1.48e-13	9.02e-13	XP_022887246.1	peptidyl-prolyl_cis-trans_isomerase_CYP18-2-like,_transcript_variant_X3	Olive	PF00160:Cyclophilin_type_peptidyl-prolyl_cis-trans_isomerase/CLD
LOC111405076	435.31	1.09425	2.13503	0.156084	7.01066	2.37e-12	1.34e-11	XP_022889548.1	uncharacterized_LOC111405076,_transcript_variant_X9	Olive
LOC111367317	81.3837	1.09337	2.13372	0.298976	3.65704	0.000255145	0.000655922	XP_022843897.1	alanine_aminotransferase_2-like	Olive	PF00155:Aminotransferase_class_I_and_II	IPR034751:Yippee domain
LOC111383837	147.309	1.09202	2.13173	0.236708	4.61339	3.96e-06	1.29e-05	XP_022863771.1	protein_DETOXIFICATION_35-like	Olive	PF01554:MatE
LOC111374634	118.536	1.08997	2.1287	0.260765	4.1799	2.92e-05	8.54e-05	XP_022853104.1	uncharacterized_LOC111374634,_transcript_variant_X2	Olive	PF13920:Zinc_finger,_C3HC4_type_(RING_finger)	IPR011053:Single hybrid motif//IPR001249:Acetyl-CoA biotin carboxyl carrier//IPR000089:Biotin/lipoyl attachment//IPR001882:Biotin-binding site
LOC111377970	161.19	1.08346	2.11911	0.253515	4.27375	1.92e-05	5.76e-05	XP_022856897.1	uncharacterized_LOC111377970	Olive		IPR003593:AAA+ ATPase domain//IPR018368:ClpA/B, conserved site 1//IPR019489:Clp ATPase, C-terminal//IPR036628:Clp, N-terminal domain superfamily//IPR027417:P-loop containing nucleoside triphosphate hydrolase//IPR028299:ClpA/B, conserved site 2//IPR001943:UVR domain//IPR001270:ClpA/B family
LOC111381465	104.938	1.07966	2.11354	0.324114	3.33113	0.000864955	0.00205346		uncharacterized_LOC111381465	Olive		IPR013083:Zinc finger, RING/FYVE/PHD-type//IPR036465:von Willebrand factor A-like domain superfamily//IPR002035:von Willebrand factor, type A//IPR001841:Zinc finger, RING-type
LOC111411603	198.359	1.07903	2.11261	0.260003	4.15006	3.32e-05	9.67e-05	XP_022897886.1	uncharacterized_LOC111411603	Olive	PF04570:zinc-finger_of_the_FCS-type,_C2-C2	IPR018082:AmbAllergen//IPR002022:Pectate lyase//IPR012334:Pectin lyase fold//IPR011050:Pectin lyase fold/virulence factor
LOC111386696	112.288	1.07873	2.11218	0.398645	2.70599	0.00681001	0.0138293	XP_022866928.1	LIM_domain-containing_protein_WLIM1	Olive	PF00412:LIM_domain
LOC111397793	339.214	1.07838	2.11167	0.2603	4.14286	3.43e-05	9.97e-05	XP_022880541.1	pyrophosphate--fructose_6-phosphate_1-phosphotransferase_subunit_alpha-like	Olive		IPR029058:Alpha/Beta hydrolase fold//IPR018202:Serine carboxypeptidase, serine active site//IPR033124:Serine carboxypeptidases, histidine active site//IPR001563:Peptidase S10, serine carboxypeptidase
LOC111383503	19998.8	1.0783	2.11155	0.107809	10.0019	1.49e-23	1.53e-22	XP_022863387.1	thiamine_thiazole_synthase_1,_chloroplastic-like	Olive	PF01946:Thi4_family	IPR002313:Lysine-tRNA ligase, class II//IPR018149:Lysyl-tRNA synthetase, class II, C-terminal//IPR006195:Aminoacyl-tRNA synthetase, class II//IPR012340:Nucleic acid-binding, OB-fold
LOC111401874	68.506	1.07689	2.10948	0.326787	3.29538	0.000982875	0.00230896	XP_022885602.1	cinnamoyl-CoA_reductase_1-like,_transcript_variant_X2	Olive	PF01370:NAD_dependent_epimerase/dehydratase_family
LOC111399558	688.285	1.07455	2.10607	0.131404	8.17743	2.9e-16	2.08e-15	XP_022882724.1	microtubule-associated_protein_70-1-like	Olive	PF07058:Microtubule-associated_protein_70
LOC111370687	241.981	1.07403	2.10531	0.195069	5.50592	3.67e-08	1.49e-07			Olive		IPR004709:Na+/H+ exchanger
LOC111401892	346.18	1.07385	2.10505	0.179318	5.98852	2.12e-09	9.65e-09	XP_022885635.1	uncharacterized_LOC111401892,_transcript_variant_X2	Olive	PF13417:Glutathione_S-transferase,_N-terminal_domain
LOC111375585	232.858	1.07359	2.10466	0.199741	5.37491	7.66e-08	3.02e-07	XP_022854193.1	membrane-associated_30_kDa_protein,_chloroplastic-like,_transcript_variant_X2	Olive	PF04012:PspA/IM30_family	IPR011009:Protein kinase-like domain superfamily//IPR017441:Protein kinase, ATP binding site//IPR008271:Serine/threonine-protein kinase, active site//IPR000719:Protein kinase domain
LOC111387854	432.569	1.06864	2.09746	0.187717	5.69285	1.25e-08	5.32e-08	XP_022868217.1	NADH--cytochrome_b5_reductase_1-like	Olive	PF00970:Oxidoreductase_FAD-binding_domain//PF00175:Oxidoreductase_NAD-binding_domain
LOC111379531	152.766	1.06573	2.09323	0.247331	4.30892	1.64e-05	4.96e-05	XP_022858691.1	GRF1-interacting_factor_3-like,_transcript_variant_X2	Olive	PF05030:SSXT_protein_(N-terminal_region)	IPR035513:Invertase/pectin methylesterase inhibitor domain superfamily//IPR006501:Pectinesterase inhibitor domain
LOC111407464	312.07	1.06553	2.09293	0.261778	4.07035	4.69e-05	0.000134043	XP_022892716.1	(S)-coclaurine_N-methyltransferase-like	Olive	PF02353:Mycolic_acid_cyclopropane_synthetase	IPR036013:Band 7/SPFH domain superfamily//IPR001972:Stomatin/HflK/HflC family
LOC111400714	102.414	1.06502	2.0922	0.280791	3.79293	0.000148878	0.000395992			Olive
LOC111411889	558.418	1.06478	2.09185	0.161256	6.603	4.03e-11	2.09e-10	XP_022898309.1	protein_RETICULATA-RELATED_4,_chloroplastic-like	Olive	PF11891:Protein_RETICULATA-related	IPR036188:FAD/NAD(P)-binding domain superfamily//IPR001100:Pyridine nucleotide-disulphide oxidoreductase, class I//IPR016156:FAD/NAD-linked reductase, dimerisation domain superfamily//IPR006258:Dihydrolipoamide dehydrogenase//IPR012999:Pyridine nucleotide-disulphide oxidoreductase, class I, active site
LOC111405817	852.052	1.06434	2.09122	0.136922	7.77334	7.64e-15	5.07e-14	XP_022890641.1	CLIP-associated_protein	Olive	PF12348:CLASP_N_terminal//PF02985:HEAT_repeat	IPR037396:FMN hydroxy acid dehydrogenase domain//IPR013785:Aldolase-type TIM barrel//IPR008259:FMN-dependent alpha-hydroxy acid dehydrogenase, active site//IPR012133:Alpha-hydroxy acid dehydrogenase, FMN-dependent
LOC111380946	86.1863	1.06219	2.0881	0.357755	2.96905	0.00298719	0.0064635	XP_022860390.1	Niemann-Pick_C1_protein-like	Olive	PF02460:Patched_family//PF16414:Niemann-Pick_C1_N_terminus
LOC111405264	1220.94	1.05945	2.08414	0.186645	5.6763	1.38e-08	5.84e-08	XP_022889837.1	muscle_M-line_assembly_protein_unc-89-like,_transcript_variant_X2	Olive
LOC111376451	219.041	1.05645	2.07981	0.200661	5.26485	1.4e-07	5.38e-07	XP_022855177.1	uncharacterized_LOC111376451	Olive	PF12906:RING-variant_domain
LOC111372122	67.3731	1.05612	2.07934	0.369471	2.85847	0.00425683	0.0089672	XP_022850070.1	protein_TIFY_6B-like	Olive	PF06200:tify_domain//PF09425:Divergent_CCT_motif	IPR024709:Putative O-fucosyltransferase, plant
LOC111376878	2357.86	1.05611	2.07932	0.119192	8.86061	7.96e-19	6.53e-18	XP_022855652.1	peptidyl-prolyl_cis-trans_isomerase_1-like	Olive	PF00160:Cyclophilin_type_peptidyl-prolyl_cis-trans_isomerase/CLD
LOC111399521	235.34	1.05568	2.0787	0.247734	4.26136	2.03e-05	6.07e-05	XP_022882655.1	rhodanese-like_domain-containing_protein_9,_chloroplastic	Olive	PF00581:Rhodanese-like_domain	IPR036882:Alba-like domain superfamily//IPR014560:Uncharacterised conserved protein UCP030333, DNA/RNA-binding Alba-related
LOC111405221	376.973	1.05563	2.07863	0.15615	6.76037	1.38e-11	7.39e-11	XP_022889785.1	magnesium_protoporphyrin_IX_methyltransferase,_chloroplastic,_transcript_variant_X2	Olive	PF07109:Magnesium-protoporphyrin_IX_methyltransferase_C-terminus
LOC111399730	505.928	1.05487	2.07754	0.191208	5.51689	3.45e-08	1.41e-07	XP_022882969.1	uncharacterized_protein_At5g02240-like	Olive	PF13460:NAD(P)H-binding
LOC111402305	160.765	1.05409	2.07641	0.346972	3.03797	0.00238181	0.00524507	XP_022886292.1	uncharacterized_LOC111402305	Olive	PF10248:Myelodysplasia-myeloid_leukemia_factor_1-interacting_protein	IPR002401:Cytochrome P450, E-class, group I//IPR036396:Cytochrome P450 superfamily//IPR017972:Cytochrome P450, conserved site//IPR001128:Cytochrome P450
LOC111381648	75.2226	1.0529	2.07469	0.368767	2.85518	0.00430119	0.00905555	XP_022861219.1	protein_S-acyltransferase_24-like	Olive		IPR037103:Tubulin/FtsZ, C-terminal domain superfamily//IPR011719:Conserved hypothetical protein CHP02058
LOC111411617	328.752	1.05215	2.07361	0.170099	6.1855	6.19e-10	2.94e-09			Olive		IPR036640:ABC transporter type 1, transmembrane domain superfamily//IPR003593:AAA+ ATPase domain//IPR017871:ABC transporter, conserved site//IPR011527:ABC transporter type 1, transmembrane domain//IPR027417:P-loop containing nucleoside triphosphate hydrolase//IPR003439:ABC transporter-like
LOC111400575	84.0798	1.04784	2.06743	0.312228	3.35601	0.000790749	0.00188822	XP_022883754.1	(+)-neomenthol_dehydrogenase-like	Olive	PF00106:short_chain_dehydrogenase	IPR003439:ABC transporter-like//IPR027417:P-loop containing nucleoside triphosphate hydrolase//IPR036640:ABC transporter type 1, transmembrane domain superfamily//IPR011527:ABC transporter type 1, transmembrane domain//IPR017871:ABC transporter, conserved site//IPR003593:AAA+ ATPase domain
LOC111399624	222.284	1.04484	2.06314	0.191932	5.44383	5.21e-08	2.09e-07	XP_022882816.1	uncharacterized_LOC111399624,_transcript_variant_X5	Olive		IPR004045:Glutathione S-transferase, N-terminal//IPR036282:Glutathione S-transferase, C-terminal domain superfamily//IPR036249:Thioredoxin-like superfamily//IPR010987:Glutathione S-transferase, C-terminal-like
LOC111368158	1070.91	1.04334	2.061	0.135574	7.69573	1.41e-14	9.19e-14	XP_022845161.1	classical_arabinogalactan_protein_4-like	Olive		IPR015875:IMP dehydrogenase / GMP reductase, conserved site//IPR005990:Inosine-5'-monophosphate dehydrogenase//IPR001093:IMP dehydrogenase/GMP reductase
LOC111367154	642.855	1.03797	2.05333	0.145886	7.11493	1.12e-12	6.47e-12	XP_022843651.1	auxin-responsive_protein_IAA27-like	Olive	PF02309:AUX/IAA_family
LOC111374783	77.2632	1.03688	2.05179	0.31459	3.29597	0.000980837	0.00230514	XP_022853287.1	probable_beta-1,4-xylosyltransferase_IRX14H	Olive	PF03360:Glycosyltransferase_family_43	IPR011009:Protein kinase-like domain superfamily//IPR008271:Serine/threonine-protein kinase, active site//IPR000719:Protein kinase domain//IPR017441:Protein kinase, ATP binding site
LOC111380395	372.529	1.03513	2.0493	0.157538	6.57067	5.01e-11	2.59e-10	XP_022859719.1	dynamin-related_protein_5A	Olive
LOC111395870	202.597	1.03315	2.04649	0.250295	4.12773	3.66e-05	0.00010606			Olive		IPR007529:Zinc finger, HIT-type
LOC111374309	1727.42	1.03215	2.04507	0.109711	9.40786	5.06e-21	4.6e-20	XP_022852732.1	probable_polygalacturonase	Olive	PF00295:Glycosyl_hydrolases_family_28
LOC111368259	323.479	1.03048	2.04271	0.178396	5.77638	7.63e-09	3.31e-08	XP_022845267.1	uncharacterized_LOC111368259	Olive	PF05910:Plant_protein_of_unknown_function_(DUF868)
LOC111379440	469.056	1.02906	2.04069	0.151867	6.77606	1.23e-11	6.65e-11	XP_022858582.1	F-box_protein_At2g02240-like	Olive	PF14299:Phloem_protein_2//PF00646:F-box_domain	IPR036915:Cyclin-like superfamily//IPR013763:Cyclin-like//IPR004367:Cyclin, C-terminal domain
LOC111383298	279.021	1.02613	2.03656	0.270394	3.79495	0.000147671	0.00039303	XP_022863149.1	peptidyl-prolyl_cis-trans_isomerase_FKBP16-4,_chloroplastic,_transcript_variant_X2	Olive	PF00254:FKBP-type_peptidyl-prolyl_cis-trans_isomerase	IPR000225:Armadillo//IPR003613:U box domain//IPR011989:Armadillo-like helical//IPR016024:Armadillo-type fold//IPR013083:Zinc finger, RING/FYVE/PHD-type
LOC111412743	6077.4	1.02504	2.03502	0.240716	4.2583	2.06e-05	6.14e-05	XP_022899433.1	enolase-like	Olive	PF00113:Enolase,_C-terminal_TIM_barrel_domain//PF03952:Enolase,_N-terminal_domain
LOC111372990	347.764	1.02258	2.03154	0.225383	4.53705	5.7e-06	1.83e-05	XP_022851197.1	porphobilinogen_deaminase,_chloroplastic-like	Olive	PF01379:Porphobilinogen_deaminase,_dipyromethane_cofactor_binding_domain	IPR036758:At5g01610-like superfamily
LOC111392876	105.201	1.02224	2.03107	0.294509	3.471	0.000518517	0.00127175	XP_022874050.1	Werner_Syndrome-like_exonuclease,_transcript_variant_X2	Olive	PF01612:3'-5'_exonuclease	IPR009057:Homeobox-like domain superfamily//IPR001356:Homeobox domain//IPR006563:POX domain
LOC111368704	443.751	1.02131	2.02976	0.181222	5.63565	1.74e-08	7.32e-08	XP_022845880.1	AP2-like_ethylene-responsive_transcription_factor_At2g41710,_transcript_variant_X2	Olive	PF00847:AP2_domain	IPR023614:Porin domain superfamily
LOC111390363	170.739	1.02096	2.02927	0.247983	4.11705	3.84e-05	0.000110799	XP_022871168.1	uncharacterized_LOC111390363,_transcript_variant_X8	Olive		IPR001469:ATP synthase, F1 complex, delta/epsilon subunit//IPR036771:F0F1 ATP synthase delta/epsilon subunit, N-terminal
LOC111409273	90.9417	1.01907	2.02661	0.291922	3.4909	0.000481389	0.00118605	XP_022895064.1	mavicyanin	Olive	PF02298:Plastocyanin-like_domain	IPR001841:Zinc finger, RING-type//IPR029044:Nucleotide-diphospho-sugar transferases//IPR013083:Zinc finger, RING/FYVE/PHD-type
LOC111378621	334.899	1.01818	2.02537	0.163594	6.22386	4.85e-10	2.32e-09	XP_022857620.1	kinesin-like_protein_KIN-14F	Olive	PF00307:Calponin_homology_(CH)_domain//PF00225:Kinesin_motor_domain
LOC111412153	312.817	1.01645	2.02293	0.170713	5.95413	2.61e-09	1.18e-08	XP_022898711.1	ras-related_protein_RABA1d-like	Olive	PF00071:Ras_family
LOC111399792	8073.34	1.01636	2.0228	0.130658	7.77874	7.33e-15	4.86e-14	XP_022883046.1	5-methyltetrahydropteroyltriglutamate--homocysteine_methyltransferase-like,_transcript_variant_X2	Olive	PF08267:Cobalamin-independent_synthase,_N-terminal_domain//PF01717:Cobalamin-independent_synthase,_Catalytic_domain	IPR006459:Casparian strip membrane protein
LOC111393334	350.641	1.01624	2.02264	0.16253	6.25265	4.04e-10	1.94e-09	XP_022874596.1	monothiol_glutaredoxin-S10-like,_transcript_variant_X6	Olive	PF00462:Glutaredoxin
LOC111373511	7469.58	1.01612	2.02247	0.160668	6.32434	2.54e-10	1.24e-09	XP_022851815.1	5-methyltetrahydropteroyltriglutamate--homocysteine_methyltransferase-like	Olive	PF08267:Cobalamin-independent_synthase,_N-terminal_domain//PF01717:Cobalamin-independent_synthase,_Catalytic_domain	IPR013763:Cyclin-like//IPR036915:Cyclin-like superfamily//IPR006671:Cyclin, N-terminal
LOC111368568	4109.54	1.01466	2.02043	0.143364	7.07753	1.47e-12	8.42e-12	XP_022845651.1	phosphoglycerate_kinase,_chloroplastic	Olive	PF00162:Phosphoglycerate_kinase
LOC111396793	254.42	1.0125	2.01741	0.197381	5.12969	2.9e-07	1.08e-06	XP_022879077.1	BAG_family_molecular_chaperone_regulator_8,_chloroplastic,_transcript_variant_X2	Olive	PF02179:BAG_domain	IPR036433:Elongation factor EF1B gamma, C-terminal domain superfamily//IPR036249:Thioredoxin-like superfamily//IPR001662:Elongation factor 1B gamma, C-terminal//IPR004045:Glutathione S-transferase, N-terminal//IPR036282:Glutathione S-transferase, C-terminal domain superfamily//IPR040079:Glutathione Transferase family//IPR010987:Glutathione S-transferase, C-terminal-like
LOC111402868	752.872	1.00911	2.01266	0.125713	8.02708	9.98e-16	6.95e-15	XP_022886939.1	protein_trichome_birefringence-like_23,_transcript_variant_X2	Olive	PF13839:GDSL/SGNH-like_Acyl-Esterase_family_found_in_Pmr5_and_Cas1p//PF14416:PMR5_N_terminal_Domain	IPR032675:Leucine-rich repeat domain superfamily//IPR011009:Protein kinase-like domain superfamily//IPR000719:Protein kinase domain//IPR008271:Serine/threonine-protein kinase, active site
LOC111379049	894.357	1.00834	2.0116	0.19814	5.08905	3.6e-07	1.33e-06	XP_022858144.1	hydroxymethylglutaryl-CoA_synthase-like	Olive	PF01154:Hydroxymethylglutaryl-coenzyme_A_synthase_N_terminal//PF08540:Hydroxymethylglutaryl-coenzyme_A_synthase_C_terminal	IPR001789:Signal transduction response regulator, receiver domain//IPR011006:CheY-like superfamily
LOC111396965	643.829	1.00712	2.0099	0.176007	5.72206	1.05e-08	4.51e-08	XP_022879375.1	obg-like_ATPase_1	Olive	PF06071:Protein_of_unknown_function_(DUF933)//PF01926:50S_ribosome-binding_GTPase	IPR001680:WD40 repeat//IPR028608:Probable cytosolic iron-sulfur protein assembly protein, CIAO1/Cia1//IPR015943:WD40/YVTN repeat-like-containing domain superfamily//IPR020472:G-protein beta WD-40 repeat//IPR019775:WD40 repeat, conserved site//IPR036322:WD40-repeat-containing domain superfamily//IPR017986:WD40-repeat-containing domain
LOC111403618	372.875	1.00567	2.00788	0.187497	5.36368	8.15e-08	3.2e-07	XP_022887955.1	uncharacterized_LOC111403618,_transcript_variant_X2	Olive		IPR006084:XPG/Rad2 endonuclease//IPR008918:Helix-hairpin-helix motif, class 2//IPR019974:XPG conserved site//IPR036279:5'-3' exonuclease, C-terminal domain superfamily//IPR029060:PIN-like domain superfamily//IPR006085:XPG N-terminal//IPR006086:XPG-I domain
LOC111383038	225.655	1.00557	2.00773	0.190575	5.27648	1.32e-07	5.06e-07	XP_022862863.1	uncharacterized_LOC111383038	Olive	PF04646:Protein_of_unknown_function,_DUF604	IPR000719:Protein kinase domain//IPR017441:Protein kinase, ATP binding site//IPR008271:Serine/threonine-protein kinase, active site//IPR011009:Protein kinase-like domain superfamily
LOC111376122	870.488	1.00545	2.00757	0.153965	6.53037	6.56e-11	3.36e-10	XP_022854818.1	uncharacterized_LOC111376122	Olive
LOC111378453	441.756	1.00464	2.00645	0.184862	5.43456	5.49e-08	2.2e-07	XP_022857419.1	endoribonuclease_YBEY,_chloroplastic	Olive	PF02130:Uncharacterized_protein_family_UPF0054//PF08282:haloacid_dehalogenase-like_hydrolase	IPR036890:Histidine kinase/HSP90-like ATPase superfamily//IPR013507:DNA mismatch repair protein, S5 domain 2-like//IPR042120:MutL, C-terminal domain, dimerisation subdomain//IPR014721:Ribosomal protein S5 domain 2-type fold, subgroup//IPR014790:MutL, C-terminal, dimerisation//IPR020568:Ribosomal protein S5 domain 2-type fold//IPR037198:MutL, C-terminal domain superfamily
LOC111398431	381.4	1.00332	2.00461	0.255223	3.93116	8.45e-05	0.000233323	XP_022881100.1	biotin_carboxylase_1,_chloroplastic	Olive	PF02785:Biotin_carboxylase_C-terminal_domain//PF02786:Carbamoyl-phosphate_synthase_L_chain,_ATP_binding_domain//PF00289:Biotin_carboxylase,_N-terminal_domain	IPR002048:EF-hand domain//IPR011992:EF-hand domain pair//IPR018247:EF-Hand 1, calcium-binding site
LOC111373043	430.894	1.00243	2.00337	0.164847	6.08095	1.19e-09	5.54e-09	XP_022851271.1	phosphoribulokinase,_chloroplastic-like	Olive	PF00485:Phosphoribulokinase_/_Uridine_kinase_family	IPR001841:Zinc finger, RING-type//IPR013083:Zinc finger, RING/FYVE/PHD-type
LOC111395471	195.251	0.994085	1.99182	0.241882	4.10979	3.96e-05	0.000114128	XP_022877242.1	mitotic_checkpoint_serine/threonine-protein_kinase_BUB1	Olive	PF08311:Mad3/BUB1_homology_region_1//PF00069:Protein_kinase_domain
LOC111408982	1508.45	0.994041	1.99176	0.128884	7.71267	1.23e-14	8.07e-14	XP_022894630.1	40S_ribosomal_protein_S7-like	Olive	PF01251:Ribosomal_protein_S7e	IPR033690:Adenylate kinase, conserved site//IPR000850:Adenylate kinase/UMP-CMP kinase//IPR006259:Adenylate kinase subfamily//IPR027417:P-loop containing nucleoside triphosphate hydrolase
LOC111409930	139.521	0.993329	1.99077	0.252221	3.93833	8.21e-05	0.000226728	XP_022895821.1	auxin_response_factor_18-like,_transcript_variant_X4	Olive	PF02309:AUX/IAA_family//PF02362:B3_DNA_binding_domain//PF06507:Auxin_response_factor	IPR000719:Protein kinase domain//IPR011009:Protein kinase-like domain superfamily
LOC111387785	63.8132	0.991425	1.98815	0.347641	2.85186	0.00434638	0.00914154	XP_022868143.1	protein_NRT1/_PTR_FAMILY_4.3-like	Olive	PF00854:POT_family	IPR014729:Rossmann-like alpha/beta/alpha sandwich fold//IPR000719:Protein kinase domain//IPR008271:Serine/threonine-protein kinase, active site//IPR011009:Protein kinase-like domain superfamily
LOC111396073	248.606	0.98994	1.9861	0.18994	5.21185	1.87e-07	7.07e-07	XP_022878117.1	glycogen_phosphorylase_1-like,_transcript_variant_X5	Olive	PF00343:Carbohydrate_phosphorylase	IPR001005:SANT/Myb domain//IPR009057:Homeobox-like domain superfamily//IPR017930:Myb domain
LOC111380424	232.469	0.987822	1.98319	0.209483	4.71551	2.41e-06	8.1e-06	XP_022859753.1	kinesin-like_protein_KIN-8B,_transcript_variant_X3	Olive	PF00225:Kinesin_motor_domain
LOC111389182	96.5195	0.987155	1.98227	0.300174	3.28861	0.00100685	0.0023607	XP_022869842.1	uncharacterized_LOC111389182,_transcript_variant_X7	Olive		IPR029044:Nucleotide-diphospho-sugar transferases
LOC111369682	154.798	0.987008	1.98207	0.228506	4.31941	1.56e-05	4.74e-05		uncharacterized_LOC111369682	Olive
LOC111376352	238.835	0.981669	1.97475	0.20108	4.88198	1.05e-06	3.68e-06		signal_peptide_peptidase-like_4	Olive		IPR019835:SWIB domain//IPR036885:SWIB/MDM2 domain superfamily
LOC111395635	145.046	0.981575	1.97462	0.228861	4.28896	1.8e-05	5.4e-05	XP_022877489.1	V-type_proton_ATPase_subunit_a2-like,_transcript_variant_X4	Olive	PF01496:V-type_ATPase_116kDa_subunit_family	IPR018067:Protein phosphatase 2A regulatory subunit PR55, conserved site//IPR015943:WD40/YVTN repeat-like-containing domain superfamily//IPR000009:Protein phosphatase 2A regulatory subunit PR55//IPR019775:WD40 repeat, conserved site//IPR001680:WD40 repeat//IPR036322:WD40-repeat-containing domain superfamily
LOC111370636	325.746	0.979962	1.97241	0.178675	5.48461	4.14e-08	1.68e-07	XP_022848222.1	B3_domain-containing_transcription_repressor_VAL2-like,_transcript_variant_X6	Olive	PF07496:CW-type_Zinc_Finger//PF02362:B3_DNA_binding_domain	IPR013083:Zinc finger, RING/FYVE/PHD-type//IPR000225:Armadillo//IPR016024:Armadillo-type fold//IPR011989:Armadillo-like helical//IPR003613:U box domain
LOC111398863	376.825	0.979848	1.97226	0.239317	4.09435	4.23e-05	0.000121523	XP_022881769.1	3-oxoacyl-[acyl-carrier-protein]_reductase_4-like	Olive	PF00106:short_chain_dehydrogenase
LOC111382138	120.333	0.979323	1.97154	0.287711	3.40384	0.000664461	0.0016027	XP_022861782.1	uncharacterized_LOC111382138	Olive	PF01256:Carbohydrate_kinase	IPR001611:Leucine-rich repeat//IPR008271:Serine/threonine-protein kinase, active site//IPR017441:Protein kinase, ATP binding site//IPR032675:Leucine-rich repeat domain superfamily//IPR011009:Protein kinase-like domain superfamily//IPR003591:Leucine-rich repeat, typical subtype//IPR000719:Protein kinase domain
LOC111401731	1084.15	0.978601	1.97055	0.128042	7.64282	2.13e-14	1.37e-13	XP_022885374.1	protein_LONGIFOLIA_1,_transcript_variant_X2	Olive	PF14309:Domain_of_unknown_function_(DUF4378)//PF14383:DUF761-associated_sequence_motif	IPR000008:C2 domain
LOC111375523	491.205	0.975948	1.96693	0.152929	6.38172	1.75e-10	8.67e-10	XP_022854130.1	GATA_transcription_factor_8-like,_transcript_variant_X2	Olive	PF00320:GATA_zinc_finger
LOC111390358	515.677	0.97468	1.96521	0.154568	6.30582	2.87e-10	1.39e-09	XP_022871151.1	phosphoglucan_phosphatase_LSF1,_chloroplastic	Olive	PF16561:Glycogen_recognition_site_of_AMP-activated_protein_kinase//PF00782:Dual_specificity_phosphatase,_catalytic_domain
LOC111392813	310.347	0.974677	1.9652	0.180355	5.40422	6.51e-08	2.58e-07	XP_022873975.1	65-kDa_microtubule-associated_protein_3-like,_transcript_variant_X2	Olive	PF03999:Microtubule_associated_protein_(MAP65/ASE1_family)	IPR036396:Cytochrome P450 superfamily//IPR001128:Cytochrome P450//IPR002401:Cytochrome P450, E-class, group I
LOC111402698	835.429	0.973264	1.96328	0.153724	6.33123	2.43e-10	1.19e-09	XP_022886823.1	photosystem_I_reaction_center_subunit_IV_B,_chloroplastic-like	Olive	PF02427:Photosystem_I_reaction_centre_subunit_IV_/_PsaE	IPR022408:Acyl-CoA-binding protein, ACBP, conserved site//IPR000582:Acyl-CoA-binding protein, ACBP//IPR035984:Acyl-CoA binding protein superfamily//IPR014352:FERM/acyl-CoA-binding protein superfamily
LOC111403693	212.707	0.971953	1.96149	0.299201	3.24849	0.00116019	0.00269371	XP_022888055.1	40S_ribosomal_protein_S26-3-like	Olive	PF01283:Ribosomal_protein_S26e
LOC111385803	246.396	0.969603	1.9583	0.192828	5.02834	4.95e-07	1.8e-06			Olive
LOC111394878	584.311	0.969009	1.9575	0.147949	6.5496	5.77e-11	2.96e-10	XP_022876697.1	protein_TIC_40,_chloroplastic	Olive	PF17830:STI1_domain	IPR032675:Leucine-rich repeat domain superfamily//IPR003591:Leucine-rich repeat, typical subtype//IPR027417:P-loop containing nucleoside triphosphate hydrolase
LOC111406214	449.192	0.968614	1.95696	0.163914	5.90929	3.44e-09	1.54e-08	XP_022891266.1	uncharacterized_protein_At4g14100-like	Olive		IPR036187:DNA mismatch repair protein MutS, core domain superfamily//IPR036678:MutS, connector domain superfamily//IPR007696:DNA mismatch repair protein MutS, core//IPR000432:DNA mismatch repair protein MutS, C-terminal//IPR016151:DNA mismatch repair protein MutS, N-terminal//IPR027417:P-loop containing nucleoside triphosphate hydrolase
LOC111376605	491.166	0.967709	1.95573	0.148975	6.4958	8.26e-11	4.2e-10	XP_022855336.1	oxysterol-binding_protein-related_protein_1D-like,_transcript_variant_X2	Olive	PF01237:Oxysterol-binding_protein//PF15413:Pleckstrin_homology_domain
LOC111393797	74.0498	0.966751	1.95443	0.347548	2.78164	0.00540858	0.0111943	XP_022875272.1	uncharacterized_LOC111393797,_transcript_variant_X2	Olive		IPR036322:WD40-repeat-containing domain superfamily//IPR001680:WD40 repeat//IPR015943:WD40/YVTN repeat-like-containing domain superfamily//IPR019775:WD40 repeat, conserved site//IPR017986:WD40-repeat-containing domain
LOC111386018	420.546	0.96551	1.95275	0.183211	5.26995	1.36e-07	5.24e-07	XP_022866230.1	transcription_factor_ABA-INDUCIBLE_bHLH-TYPE-like,_transcript_variant_X3	Olive	PF00010:Helix-loop-helix_DNA-binding_domain//PF14215:bHLH-MYC_and_R2R3-MYB_transcription_factors_N-terminal	IPR011016:Zinc finger, RING-CH-type//IPR013083:Zinc finger, RING/FYVE/PHD-type
LOC111398288	687.479	0.965004	1.95207	0.167228	5.77059	7.9e-09	3.42e-08	XP_022880978.1	calcium-dependent_protein_kinase_13-like	Olive	PF13499:EF-hand_domain_pair//PF00036:EF_hand//PF00069:Protein_kinase_domain
LOC111377858	251.266	0.961891	1.94786	0.182384	5.27398	1.33e-07	5.13e-07	XP_022856762.1	DNA_repair_protein_recA_homolog_3,_mitochondrial-like,_transcript_variant_X2	Olive	PF00154:recA_bacterial_DNA_recombination_protein	IPR003441:NAC domain//IPR036093:NAC domain superfamily
LOC111374135	301.545	0.961271	1.94702	0.186396	5.15714	2.51e-07	9.37e-07	XP_022852532.1	nucleobase-ascorbate_transporter_6-like,_transcript_variant_X5	Olive	PF00860:Permease_family
LOC111387907	574.578	0.960615	1.94614	0.205236	4.68053	2.86e-06	9.5e-06	XP_022868290.1	fumarylacetoacetase	Olive	PF01557:Fumarylacetoacetate_(FAA)_hydrolase_family//PF09298:Fumarylacetoacetase_N-terminal
LOC111372362	126.471	0.960506	1.94599	0.24402	3.93617	8.28e-05	0.000228657	XP_022850434.1	(S)-ureidoglycine_aminohydrolase	Olive
LOC111405203	2334.96	0.959765	1.94499	0.129532	7.40947	1.27e-13	7.77e-13	XP_022889757.1	pyrophosphate-energized_vacuolar_membrane_proton_pump_1,_transcript_variant_X2	Olive	PF03030:Inorganic_H+_pyrophosphatase
LOC111382379	311.103	0.95919	1.94422	0.186466	5.14406	2.69e-07	1e-06	XP_022862106.1	probable_receptor-like_protein_kinase_At2g42960,_transcript_variant_X3	Olive	PF00069:Protein_kinase_domain
LOC111366100	2868.14	0.956571	1.94069	0.111038	8.61479	7.01e-18	5.48e-17	XP_022842522.1	20_kDa_chaperonin,_chloroplastic	Olive	PF00166:Chaperonin_10_Kd_subunit	IPR036910:High mobility group box domain superfamily//IPR009071:High mobility group box domain
LOC111369511	136.616	0.954851	1.93838	0.252529	3.78115	0.000156107	0.000414205	XP_022846825.1	uncharacterized_LOC111369511	Olive		IPR036638:Helix-loop-helix DNA-binding domain superfamily//IPR011598:Myc-type, basic helix-loop-helix (bHLH) domain
LOC111396874	425.816	0.953864	1.93705	0.153422	6.21724	5.06e-10	2.42e-09	XP_022879233.1	GATA_transcription_factor_8-like	Olive	PF00320:GATA_zinc_finger	IPR028889:Ubiquitin specific protease domain//IPR018200:Ubiquitin specific protease, conserved site//IPR038765:Papain-like cysteine peptidase superfamily
LOC111385022	108.137	0.95377	1.93693	0.267852	3.56081	0.00036971	0.000927197			Olive		IPR015943:WD40/YVTN repeat-like-containing domain superfamily//IPR011989:Armadillo-like helical//IPR017986:WD40-repeat-containing domain//IPR016024:Armadillo-type fold//IPR029347:Raptor, N-terminal CASPase-like domain//IPR036322:WD40-repeat-containing domain superfamily//IPR001680:WD40 repeat
LOC111380011	472.23	0.953382	1.93641	0.144738	6.58693	4.49e-11	2.32e-10	XP_022859240.1	probable_pectate_lyase_8	Olive	PF00544:Pectate_lyase
LOC111383103	202.066	0.950989	1.9332	0.212335	4.47872	7.51e-06	2.37e-05	XP_022862945.1	uncharacterized_LOC111383103,_transcript_variant_X2	Olive	PF13456:Reverse_transcriptase-like	IPR001360:Glycoside hydrolase family 1//IPR017853:Glycoside hydrolase superfamily//IPR033132:Glycosyl hydrolases family 1, N-terminal conserved site
LOC111383739	60.4014	0.947802	1.92893	0.340409	2.7843	0.00536433	0.0111102	XP_022863657.1	peptidyl-prolyl_cis-trans_isomerase_9-like,_transcript_variant_X5	Olive	PF00160:Cyclophilin_type_peptidyl-prolyl_cis-trans_isomerase/CLD
LOC111404678	940.598	0.947045	1.92792	0.134067	7.06395	1.62e-12	9.26e-12	XP_022889219.1	uncharacterized_LOC111404678	Olive	PF12796:Ankyrin_repeats_(3_copies)//PF13962:Domain_of_unknown_function
LOC111387994	1406	0.944975	1.92516	0.162372	5.81981	5.89e-09	2.58e-08		60S_ribosomal_protein_L3-2-like	Olive
LOC111373671	126.603	0.944957	1.92513	0.25553	3.69802	0.000217284	0.000564763		uncharacterized_LOC111373671	Olive
LOC111388026	426.019	0.94033	1.91897	0.14836	6.33814	2.33e-10	1.14e-09	XP_022868456.1	DNA-directed_RNA_polymerases_II,_IV_and_V_subunit_3-like	Olive	PF01000:RNA_polymerase_Rpb3/RpoA_insert_domain//PF01193:RNA_polymerase_Rpb3/Rpb11_dimerisation_domain
LOC111397040	409.362	0.938462	1.91648	0.159378	5.88829	3.9e-09	1.73e-08	XP_022879494.1	transcription_factor_BIM2-like,_transcript_variant_X5	Olive	PF00010:Helix-loop-helix_DNA-binding_domain	IPR000571:Zinc finger, CCCH-type
LOC111382222	207.998	0.938401	1.9164	0.240867	3.89594	9.78e-05	0.000267179	XP_022861896.1	peroxidase_31-like	Olive	PF00141:Peroxidase
LOC111373453	94.7232	0.93649	1.91387	0.290486	3.22387	0.0012647	0.00291843	XP_022851755.1	uncharacterized_LOC111373453,_transcript_variant_X4	Olive	PF04784:Protein_of_unknown_function,_DUF547//PF14389:Leucine-zipper_of_ternary_complex_factor_MIP1	IPR027417:P-loop containing nucleoside triphosphate hydrolase//IPR013083:Zinc finger, RING/FYVE/PHD-type//IPR001752:Kinesin motor domain//IPR019821:Kinesin motor domain, conserved site//IPR036961:Kinesin motor domain superfamily//IPR001841:Zinc finger, RING-type
LOC111377612	319.68	0.935768	1.91291	0.170423	5.49085	4e-08	1.62e-07			Olive		IPR037219:Peptidase M41-like//IPR027417:P-loop containing nucleoside triphosphate hydrolase//IPR003960:ATPase, AAA-type, conserved site//IPR003593:AAA+ ATPase domain
LOC111373952	84.83	0.933832	1.91034	0.401723	2.32457	0.020095	0.0369662		uncharacterized_LOC111373952	Olive
LOC111386264	371.76	0.931314	1.90701	0.176305	5.28239	1.28e-07	4.91e-07		uncharacterized_LOC111386264	Olive
LOC111373227	166.925	0.930636	1.90612	0.224462	4.14608	3.38e-05	9.83e-05	XP_022851502.1	importin-9	Olive	PF03810:Importin-beta_N-terminal_domain
LOC111401704	581.824	0.929907	1.90515	0.143382	6.48552	8.84e-11	4.48e-10	XP_022885330.1	transcription_factor_MYB61-like	Olive	PF00249:Myb-like_DNA-binding_domain	IPR000719:Protein kinase domain//IPR008271:Serine/threonine-protein kinase, active site//IPR011009:Protein kinase-like domain superfamily//IPR017441:Protein kinase, ATP binding site
LOC111409729	263.663	0.929849	1.90508	0.191394	4.85831	1.18e-06	4.12e-06	XP_022895495.1	probable_serine/threonine-protein_kinase_At1g01540	Olive	PF00069:Protein_kinase_domain
LOC111384103	193.178	0.928084	1.90275	0.254	3.65387	0.000258314	0.000663612	XP_022864107.1	DNA-directed_RNA_polymerases_II,_IV_and_V_subunit_9A,_transcript_variant_X2	Olive	PF02150:RNA_polymerases_M/15_Kd_subunit//PF01096:Transcription_factor_S-II_(TFIIS)
LOC111382931	303.353	0.924548	1.89809	0.172095	5.3723	7.77e-08	3.06e-07	XP_022862741.1	ras-related_protein_RABA1f	Olive	PF00071:Ras_family	IPR023173:NADPH-cytochrome p450 reductase, FAD-binding, alpha-helical domain superfamily//IPR001094:Flavodoxin-like//IPR023208:NADPH-cytochrome P450 reductase//IPR039261:Ferredoxin-NADP reductase (FNR), nucleotide-binding domain//IPR008254:Flavodoxin/nitric oxide synthase//IPR017927:FAD-binding domain, ferredoxin reductase-type//IPR001709:Flavoprotein pyridine nucleotide cytochrome reductase//IPR…
LOC111399168	278.148	0.922258	1.89508	0.175548	5.25358	1.49e-07	5.7e-07	XP_022882202.1	calumenin-like,_transcript_variant_X5	Olive	PF13202:EF_hand//PF13833:EF-hand_domain_pair	IPR036259:MFS transporter superfamily
LOC111398750	540.103	0.919116	1.89096	0.146987	6.25304	4.03e-10	1.94e-09	XP_022881593.1	cytochrome_c-type_biogenesis_CcmH-like_mitochondrial_protein,_transcript_variant_X3	Olive	PF03918:Cytochrome_C_biogenesis_protein	IPR036249:Thioredoxin-like superfamily//IPR004123:Dim1 family
LOC111387855	904.094	0.916629	1.8877	0.193878	4.72786	2.27e-06	7.66e-06		kelch_repeat-containing_protein_At3g27220-like	Olive
LOC111386854	748.989	0.915919	1.88677	0.185707	4.93206	8.14e-07	2.88e-06	XP_022867183.1	superoxide_dismutase_[Mn],_mitochondrial-like,_transcript_variant_X2	Olive	PF00081:Iron/manganese_superoxide_dismutases,_alpha-hairpin_domain//PF02777:Iron/manganese_superoxide_dismutases,_C-terminal_domain
LOC111380273	911.389	0.915886	1.88673	0.144256	6.34902	2.17e-10	1.07e-09		uncharacterized_LOC111380273	Olive		IPR039261:Ferredoxin-NADP reductase (FNR), nucleotide-binding domain//IPR000778:Cytochrome b245, heavy chain//IPR017927:FAD-binding domain, ferredoxin reductase-type//IPR011992:EF-hand domain pair//IPR002048:EF-hand domain//IPR018247:EF-Hand 1, calcium-binding site//IPR017938:Riboflavin synthase-like beta-barrel
LOC111390370	196.451	0.908125	1.87661	0.213866	4.24623	2.17e-05	6.47e-05	XP_022871176.1	uncharacterized_LOC111390370	Olive		IPR004131:Pyrophosphate-energised proton pump
LOC111381748	672.223	0.907258	1.87548	0.13168	6.88987	5.58e-12	3.08e-11	XP_022861425.1	GATA_transcription_factor_8-like,_transcript_variant_X2	Olive	PF00320:GATA_zinc_finger
LOC111383344	152.236	0.900591	1.86683	0.224547	4.01071	6.05e-05	0.000170301	XP_022863209.1	shikimate_kinase,_chloroplastic-like,_transcript_variant_X3	Olive	PF01202:Shikimate_kinase
LOC111407065	137.598	0.898246	1.8638	0.270958	3.31507	0.000916207	0.00216474	XP_022892166.1	uncharacterized_LOC111407065	Olive	PF12023:Domain_of_unknown_function_(DUF3511)	IPR003700:Ketopantoate hydroxymethyltransferase//IPR040442:Pyruvate kinase-like domain superfamily//IPR015813:Pyruvate/Phosphoenolpyruvate kinase-like domain superfamily
LOC111409846	4345.33	0.897854	1.86329	0.102608	8.75035	2.13e-18	1.71e-17	XP_022895694.1	S-adenosylmethionine_synthase_1-like	Olive	PF02772:S-adenosylmethionine_synthetase,_central_domain//PF00438:S-adenosylmethionine_synthetase,_N-terminal_domain//PF02773:S-adenosylmethionine_synthetase,_C-terminal_domain
LOC111384564	93.8356	0.892759	1.85672	0.309606	2.88353	0.00393243	0.00833659	XP_022864625.1	membrane-associated_30_kDa_protein,_chloroplastic	Olive	PF04012:PspA/IM30_family	IPR021109:Aspartic peptidase domain superfamily//IPR034161:Pepsin-like domain, plant//IPR001969:Aspartic peptidase, active site//IPR001461:Aspartic peptidase A1 family//IPR033121:Peptidase family A1 domain
LOC111403794	142.513	0.89199	1.85573	0.263008	3.3915	0.00069512	0.0016721		uncharacterized_LOC111403794	Olive		IPR001810:F-box domain//IPR017451:F-box associated interaction domain//IPR036047:F-box-like domain superfamily
LOC111379341	2960.31	0.890824	1.85423	0.110231	8.08145	6.4e-16	4.51e-15	XP_022858467.1	calcium-transporting_ATPase_1-like	Olive	PF00689:Cation_transporting_ATPase,_C-terminus//PF00122:E1-E2_ATPase//PF00702:haloacid_dehalogenase-like_hydrolase//PF12515:Ca2+-ATPase_N_terminal_autoinhibitory_domain//PF00690:Cation_transporter/ATPase,_N-terminus	IPR011992:EF-hand domain pair//IPR002048:EF-hand domain//IPR018247:EF-Hand 1, calcium-binding site
LOC111370891	205.716	0.88786	1.85043	0.206853	4.29222	1.77e-05	5.32e-05		uncharacterized_LOC111370891	Olive
LOC111392980	199.137	0.887041	1.84938	0.201767	4.39635	1.1e-05	3.4e-05	XP_022874157.1	receptor-like_serine/threonine-protein_kinase_NCRK	Olive	PF00069:Protein_kinase_domain	IPR013026:Tetratricopeptide repeat-containing domain//IPR019734:Tetratricopeptide repeat//IPR011990:Tetratricopeptide-like helical domain superfamily//IPR006597:Sel1-like repeat
LOC111372690	387.033	0.884411	1.84601	0.183558	4.81815	1.45e-06	5e-06	XP_022850845.1	isoamylase_1,_chloroplastic	Olive	PF02922:Carbohydrate-binding_module_48_(Isoamylase_N-terminal_domain)//PF00128:Alpha_amylase,_catalytic_domain
LOC111409109	123.325	0.883843	1.84528	0.273345	3.23344	0.00122311	0.00282847	XP_022894814.1	pentatricopeptide_repeat-containing_protein_At4g33990-like,_transcript_variant_X6	Olive	PF14432:DYW_family_of_nucleic_acid_deaminases//PF13041:PPR_repeat_family//PF01535:PPR_repeat	IPR016897:S-phase kinase-associated protein 1//IPR011333:SKP1/BTB/POZ domain superfamily//IPR001232:S-phase kinase-associated protein 1-like//IPR036296:SKP1-like, dimerisation domain superfamily
LOC111387107	100.273	0.882688	1.84381	0.271358	3.25285	0.00114252	0.00265598		uncharacterized_protein_LOC111387107	Olive
LOC111372769	58.6815	0.88258	1.84367	0.376814	2.34222	0.0191696	0.0354109	XP_022850931.1	inactive_protein_kinase_SELMODRAFT_444075-like	Olive	PF07714:Protein_tyrosine_kinase	IPR002842:V-type ATPase subunit E//IPR038495:V-type ATPase subunit E, C-terminal domain superfamily
LOC111375175	210.648	0.878947	1.83903	0.201935	4.35263	1.35e-05	4.11e-05	XP_022853743.1	ABC_transporter_C_family_member_10-like	Olive	PF00005:ABC_transporter//PF00664:ABC_transporter_transmembrane_region	IPR017877:Myb-like domain
LOC111385011	537.164	0.877876	1.83767	0.164427	5.33902	9.35e-08	3.64e-07	XP_022865132.1	jmjC_domain-containing_protein_4,_transcript_variant_X2	Olive	PF13621:Cupin-like_domain
LOC111375518	123.139	0.877775	1.83754	0.253822	3.45823	0.000543738	0.00132954	XP_022854122.1	probable_cysteine_protease_RD19D	Olive	PF08246:Cathepsin_propeptide_inhibitor_domain_(I29)//PF00112:Papain_family_cysteine_protease	IPR037104:Annexin superfamily//IPR018502:Annexin repeat//IPR009118:Annexin D, plant//IPR001464:Annexin//IPR018252:Annexin repeat, conserved site
LOC111409792	142.977	0.871642	1.82974	0.238532	3.6542	0.000257987	0.000662874	XP_022895596.1	phytochrome_A1-like	Olive	PF08446:PAS_fold//PF00989:PAS_fold//PF01590:GAF_domain//PF02518:Histidine_kinase-,_DNA_gyrase_B-,_and_HSP90-like_ATPase//PF00512:His_Kinase_A_(phospho-acceptor)_domain//PF00360:Phytochrome_region
LOC111370537	112.021	0.871419	1.82946	0.289035	3.01492	0.00257047	0.00562845	XP_022848053.1	ubiquitin-like_modifier-activating_enzyme_atg7,_transcript_variant_X5	Olive	PF16420:Ubiquitin-like_modifier-activating_enzyme_ATG7_N-terminus
LOC111367493	247.517	0.870058	1.82774	0.182535	4.76653	1.87e-06	6.39e-06	XP_022844169.1	putative_dual_specificity_protein_phosphatase_DSP8	Olive	PF00782:Dual_specificity_phosphatase,_catalytic_domain	IPR000222:PPM-type phosphatase, divalent cation binding//IPR001932:PPM-type phosphatase domain//IPR036457:PPM-type phosphatase domain superfamily
LOC111379484	118.168	0.866575	1.82333	0.262545	3.30067	0.000964527	0.00226934	XP_022858627.1	AT-hook_motif_nuclear-localized_protein_1-like,_transcript_variant_X3	Olive	PF02178:AT_hook_motif//PF03479:Plants_and_Prokaryotes_Conserved_(PCC)_domain	IPR011257:DNA glycosylase
LOC111369533	522.149	0.866416	1.82313	0.161172	5.37572	7.63e-08	3e-07	XP_022846861.1	probable_1-deoxy-D-xylulose-5-phosphate_synthase_2,_chloroplastic,_transcript_variant_X2	Olive	PF13292:1-deoxy-D-xylulose-5-phosphate_synthase//PF02780:Transketolase,_C-terminal_domain//PF02779:Transketolase,_pyrimidine_binding_domain	IPR006501:Pectinesterase inhibitor domain//IPR034086:Pectinesterase inhibitor, plant//IPR035513:Invertase/pectin methylesterase inhibitor domain superfamily
LOC111375588	250.226	0.865345	1.82178	0.214135	4.04112	5.32e-05	0.000150819	XP_022854195.1	peptide_chain_release_factor_PrfB1,_chloroplastic	Olive	PF03462:PCRF_domain//PF00472:RF-1_domain
LOC111378618	572.021	0.864964	1.82129	0.173262	4.99224	5.97e-07	2.15e-06		uridine_kinase-like_protein_3	Olive		IPR035965:PAS domain superfamily//IPR001810:F-box domain//IPR015915:Kelch-type beta propeller//IPR036047:F-box-like domain superfamily//IPR011043:Galactose oxidase/kelch, beta-propeller
LOC111412094	1472.57	0.86371	1.81971	0.207732	4.1578	3.21e-05	9.36e-05	XP_022898624.1	triosephosphate_isomerase,_chloroplastic-like	Olive	PF00121:Triosephosphate_isomerase	IPR002048:EF-hand domain//IPR011992:EF-hand domain pair
LOC111366806	722.784	0.863438	1.81937	0.139054	6.20938	5.32e-10	2.54e-09	XP_022843270.1	protein_CELLULOSE_SYNTHASE_INTERACTIVE_1-like	Olive	PF00514:Armadillo/beta-catenin-like_repeat
LOC111407487	1922.39	0.86134	1.81673	0.110588	7.78871	6.77e-15	4.5e-14	XP_022892759.1	two-component_response_regulator-like_APRR2,_transcript_variant_X4	Olive	PF00072:Response_regulator_receiver_domain//PF00249:Myb-like_DNA-binding_domain	IPR032675:Leucine-rich repeat domain superfamily//IPR027417:P-loop containing nucleoside triphosphate hydrolase
LOC111374308	1205.67	0.860474	1.81563	0.113628	7.57273	3.65e-14	2.32e-13	XP_022852731.1	ethylene_receptor-like	Olive	PF00512:His_Kinase_A_(phospho-acceptor)_domain//PF02518:Histidine_kinase-,_DNA_gyrase_B-,_and_HSP90-like_ATPase
LOC111385363	947.512	0.860452	1.81561	0.121383	7.08871	1.35e-12	7.78e-12	XP_022865514.1	cellulose_synthase_A_catalytic_subunit_1_[UDP-forming]-like	Olive	PF14569:Zinc-binding_RING-finger//PF03552:Cellulose_synthase	IPR035595:UDP-glycosyltransferase family, conserved site
LOC111410500	122.932	0.859192	1.81402	0.271803	3.16108	0.00157183	0.00356767	XP_022896630.1	protein_JINGUBANG-like	Olive	PF00400:WD_domain,_G-beta_repeat
LOC111400324	237.221	0.859107	1.81391	0.185873	4.622	3.8e-06	1.24e-05	XP_022883507.1	30S_ribosomal_protein_S9,_chloroplastic	Olive	PF00380:Ribosomal_protein_S9/S16	IPR001841:Zinc finger, RING-type//IPR013083:Zinc finger, RING/FYVE/PHD-type
LOC111375477	411.04	0.858399	1.81302	0.165731	5.17947	2.23e-07	8.36e-07	XP_022854073.1	GDSL_esterase/lipase_At4g10955	Olive	PF01764:Lipase_(class_3)	IPR036259:MFS transporter superfamily
LOC111393536	878.613	0.856522	1.81067	0.129611	6.60839	3.89e-11	2.02e-10	XP_022874877.1	chlorophyll_a-b_binding_protein_7,_chloroplastic	Olive	PF00504:Chlorophyll_A-B_binding_protein	IPR002048:EF-hand domain//IPR018247:EF-Hand 1, calcium-binding site//IPR011992:EF-hand domain pair
LOC111403652	1106.08	0.854059	1.80758	0.12895	6.62316	3.52e-11	1.83e-10	XP_022888004.1	protein_DETOXIFICATION_21-like	Olive	PF01554:MatE	IPR017972:Cytochrome P450, conserved site//IPR001128:Cytochrome P450//IPR002401:Cytochrome P450, E-class, group I//IPR036396:Cytochrome P450 superfamily
LOC111390921	291.616	0.853689	1.80712	0.184618	4.62408	3.76e-06	1.23e-05	XP_022871846.1	putative_nitric_oxide_synthase	Olive	PF01926:50S_ribosome-binding_GTPase	IPR023213:Chloramphenicol acetyltransferase-like domain superfamily
LOC111369452	137.377	0.852445	1.80556	0.276852	3.07906	0.00207652	0.00462059	XP_022846738.1	AT-hook_motif_nuclear-localized_protein_7-like	Olive	PF03479:Plants_and_Prokaryotes_Conserved_(PCC)_domain//PF02178:AT_hook_motif
LOC111386604	1279.35	0.850806	1.80351	0.129533	6.56825	5.09e-11	2.63e-10	XP_022866842.1	ferredoxin--NADP_reductase,_root-type_isozyme,_chloroplastic-like	Olive	PF00175:Oxidoreductase_NAD-binding_domain
LOC111396591	1937.15	0.846651	1.79832	0.105878	7.99651	1.28e-15	8.87e-15	XP_022878768.1	serine_carboxypeptidase-like_50	Olive	PF00450:Serine_carboxypeptidase
LOC111408832	83.211	0.844313	1.79541	0.30431	2.77452	0.00552837	0.0114261	XP_022894386.1	BEL1-like_homeodomain_protein_4,_transcript_variant_X6	Olive	PF07526:Associated_with_HOX//PF05920:Homeobox_KN_domain	IPR004827:Basic-leucine zipper domain//IPR025422:Transcription factor TGA like domain
LOC111383675	440.552	0.843317	1.79417	0.154516	5.45779	4.82e-08	1.94e-07	XP_022863573.1	uncharacterized_protein_At3g49140-like	Olive
LOC111365332	1011.29	0.842713	1.79342	0.117462	7.17437	7.26e-13	4.24e-12	XP_022841564.1	putative_late_blight_resistance_protein_homolog_R1A-10	Olive	PF00931:NB-ARC_domain
LOC111402879	945.233	0.841954	1.79248	0.128506	6.55185	5.68e-11	2.92e-10	XP_022886963.1	probable_polygalacturonase,_transcript_variant_X4	Olive	PF00295:Glycosyl_hydrolases_family_28
LOC111403046	72.4709	0.841433	1.79183	0.311499	2.70124	0.00690822	0.0140102		uncharacterized_LOC111403046,_transcript_variant_X3	Olive		IPR036955:AP2/ERF domain superfamily//IPR001471:AP2/ERF domain//IPR016177:DNA-binding domain superfamily
LOC111409302	153.667	0.840821	1.79107	0.232562	3.61547	0.000299804	0.000763144	XP_022895096.1	uncharacterized_LOC111409302	Olive
LOC111392942	91.0015	0.840623	1.79082	0.291258	2.88618	0.00389951	0.00827148	XP_022874124.1	mannan_endo-1,4-beta-mannosidase_6-like,_transcript_variant_X3	Olive	PF00150:Cellulase_(glycosyl_hydrolase_family_5)	IPR005202:Transcription factor GRAS
LOC111385588	240.63	0.837607	1.78708	0.229012	3.65749	0.0002547	0.000654878	XP_022865764.1	kinesin-like_protein_KIN-7E,_chloroplastic,_transcript_variant_X2	Olive	PF00225:Kinesin_motor_domain	IPR029071:Ubiquitin-like domain superfamily//IPR006577:UAS//IPR001012:UBX domain//IPR036249:Thioredoxin-like superfamily
LOC111384050	517.663	0.836453	1.78565	0.146914	5.6935	1.24e-08	5.3e-08	XP_022864032.1	ubiquitin_receptor_RAD23c-like,_transcript_variant_X2	Olive	PF00627:UBA/TS-N_domain//PF09280:XPC-binding_domain//PF00240:Ubiquitin_family
LOC111411019	89.3733	0.835753	1.78479	0.337029	2.47977	0.0131468	0.0251902		uncharacterized_LOC111411019	Olive
LOC111396139	99.7331	0.834671	1.78345	0.279895	2.98208	0.00286293	0.00621543	XP_022878220.1	uncharacterized_LOC111396139	Olive	PF13456:Reverse_transcriptase-like
LOC111380214	311.83	0.831389	1.7794	0.177274	4.68986	2.73e-06	9.11e-06	XP_022859481.1	uncharacterized_LOC111380214	Olive
LOC111370918	2009.63	0.830499	1.7783	0.170997	4.85679	1.19e-06	4.15e-06	XP_022848589.1	isopentenyl-diphosphate_Delta-isomerase_I-like	Olive	PF00293:NUDIX_domain	IPR036893:SBP domain superfamily//IPR004333:SBP domain
LOC111372192	314.579	0.828368	1.77568	0.176112	4.70364	2.56e-06	8.56e-06	XP_022850175.1	homeobox-leucine_zipper_protein_HOX10-like,_transcript_variant_X6	Olive	PF00046:Homeodomain
LOC111373846	1131.69	0.828244	1.77552	0.126334	6.55596	5.53e-11	2.85e-10	XP_022852196.1	putative_late_blight_resistance_protein_homolog_R1B-17,_transcript_variant_X3	Olive	PF00931:NB-ARC_domain//PF18052:Rx_N-terminal_domain	IPR010089:Flavoprotein WrbA-like//IPR029039:Flavoprotein-like superfamily//IPR008254:Flavodoxin/nitric oxide synthase
LOC111378241	307.219	0.827335	1.7744	0.194444	4.25488	2.09e-05	6.23e-05	XP_022857179.1	erythromycin_3''-O-methyltransferase-like,_transcript_variant_X2	Olive	PF08241:Methyltransferase_domain	IPR001471:AP2/ERF domain//IPR016177:DNA-binding domain superfamily//IPR036955:AP2/ERF domain superfamily
LOC111366139	200.65	0.826766	1.7737	0.204802	4.03691	5.42e-05	0.000153332	XP_022842590.1	methyltransferase-like_protein_5	Olive	PF05175:Methyltransferase_small_domain
LOC111388047	80.2829	0.822803	1.76884	0.312089	2.63644	0.00837816	0.016719	XP_022868478.1	auxin-responsive_protein_SAUR50-like	Olive	PF02519:Auxin_responsive_protein	IPR008942:ENTH/VHS//IPR035967:SWAP/Surp superfamily//IPR000061:SWAP/Surp//IPR006569:CID domain
LOC111407889	547.055	0.821866	1.76769	0.138649	5.92767	3.07e-09	1.38e-08	XP_022893355.1	uncharacterized_LOC111407889	Olive	PF03398:Regulator_of_Vps4_activity_in_the_MVB_pathway
LOC111376477	114.747	0.818893	1.76405	0.284473	2.87863	0.00399407	0.0084582		uncharacterized_LOC111376477,_transcript_variant_X3	Olive
LOC111408858	609.714	0.818547	1.76363	0.152127	5.38069	7.42e-08	2.93e-07	XP_022894438.1	uncharacterized_LOC111408858,_transcript_variant_X6	Olive		IPR000719:Protein kinase domain//IPR032675:Leucine-rich repeat domain superfamily//IPR008271:Serine/threonine-protein kinase, active site//IPR011009:Protein kinase-like domain superfamily//IPR003591:Leucine-rich repeat, typical subtype
LOC111390738	855.042	0.818447	1.76351	0.155546	5.26178	1.43e-07	5.46e-07	XP_022871600.1	probable_inactive_leucine-rich_repeat_receptor-like_protein_kinase_At3g03770,_transcript_variant_X5	Olive	PF07714:Protein_tyrosine_kinase//PF13855:Leucine_rich_repeat
LOC111385589	492.62	0.818036	1.763	0.194895	4.19732	2.7e-05	7.94e-05	XP_022865765.1	protein_CELLULOSE_SYNTHASE_INTERACTIVE_3-like	Olive	PF00514:Armadillo/beta-catenin-like_repeat//PF00168:C2_domain	IPR027417:P-loop containing nucleoside triphosphate hydrolase//IPR000850:Adenylate kinase/UMP-CMP kinase//IPR033690:Adenylate kinase, conserved site//IPR006259:Adenylate kinase subfamily
LOC111381951	106.945	0.817987	1.76295	0.26193	3.12293	0.00179062	0.00402651	XP_022861562.1	uncharacterized_LOC111381951	Olive
LOC111379770	192.024	0.817757	1.76266	0.219582	3.72416	0.000195969	0.00051253	XP_022858980.1	heavy_metal-associated_isoprenylated_plant_protein_35-like	Olive	PF00403:Heavy-metal-associated_domain
LOC111377616	93.4005	0.812119	1.75579	0.28164	2.88354	0.00393236	0.00833659		UDP-glycosyltransferase_76C5-like	Olive
LOC111394205	6062.07	0.810777	1.75416	0.166376	4.87317	1.1e-06	3.84e-06	XP_022875740.1	sucrose_synthase_2-like	Olive	PF00534:Glycosyl_transferases_group_1//PF00862:Sucrose_synthase
LOC111382423	815.182	0.808515	1.75141	0.149191	5.41934	5.98e-08	2.38e-07	XP_022862159.1	alpha-L-fucosidase_1-like	Olive	PF01120:Alpha-L-fucosidase
LOC111407011	1462.68	0.8072	1.74981	0.1172	6.88738	5.68e-12	3.14e-11	XP_022892122.1	homeobox-leucine_zipper_protein_REVOLUTA-like	Olive	PF00046:Homeodomain//PF08670:MEKHLA_domain
LOC111410525	256.341	0.807051	1.74963	0.252354	3.19809	0.00138339	0.0031712	XP_022896678.1	rac-like_GTP-binding_protein_ARAC3	Olive	PF00071:Ras_family
LOC111393766	339.741	0.804543	1.74659	0.167378	4.80674	1.53e-06	5.28e-06	XP_022875230.1	AUGMIN_subunit_3,_transcript_variant_X3	Olive	PF14932:HAUS_augmin-like_complex_subunit_3	IPR014977:WRC domain//IPR003347:JmjC domain//IPR001841:Zinc finger, RING-type
LOC111366996	59.1008	0.803829	1.74573	0.341749	2.35211	0.0186674	0.0345593	XP_022843441.1	uncharacterized_LOC111366996	Olive	PF00300:Histidine_phosphatase_superfamily_(branch_1)	IPR032675:Leucine-rich repeat domain superfamily
LOC111374916	666.901	0.80357	1.74541	0.146212	5.49593	3.89e-08	1.58e-07	XP_022853442.1	kinesin-like_protein_KIN-7D,_mitochondrial,_transcript_variant_X6	Olive	PF00225:Kinesin_motor_domain//PF13920:Zinc_finger,_C3HC4_type_(RING_finger)
LOC111365946	525.372	0.803558	1.7454	0.148491	5.41148	6.25e-08	2.48e-07	XP_022842289.1	leucine-rich_repeat_receptor-like_tyrosine-protein_kinase_PXC3	Olive	PF07714:Protein_tyrosine_kinase//PF00560:Leucine_Rich_Repeat//PF13855:Leucine_rich_repeat//PF08263:Leucine_rich_repeat_N-terminal_domain	IPR000608:Ubiquitin-conjugating enzyme E2//IPR016135:Ubiquitin-conjugating enzyme/RWD-like//IPR023313:Ubiquitin-conjugating enzyme, active site
LOC111396250	357.32	0.800992	1.7423	0.162314	4.93483	8.02e-07	2.85e-06	XP_022878391.1	lysine-rich_arabinogalactan_protein_19	Olive
LOC111369805	311.802	0.800982	1.74229	0.242199	3.30712	0.000942607	0.00222103	XP_022847236.1	calvin_cycle_protein_CP12-1,_chloroplastic	Olive	PF02672:CP12_domain
LOC111378902	149.168	0.800243	1.74139	0.28118	2.84602	0.00442697	0.00930172	XP_022857948.1	uncharacterized_LOC111378902,_transcript_variant_X2	Olive		IPR001294:Phytochrome//IPR035965:PAS domain superfamily//IPR003018:GAF domain//IPR013516:Phytochrome chromophore binding site//IPR003594:Histidine kinase/HSP90-like ATPase//IPR012129:Phytochrome A/B/C/D/E//IPR036890:Histidine kinase/HSP90-like ATPase superfamily//IPR000014:PAS domain//IPR029016:GAF-like domain superfamily//IPR003661:Signal transduction histidine kinase, dimerisation/phosphoaccept…
LOC111397822	471.421	0.798447	1.73923	0.153476	5.20241	1.97e-07	7.43e-07	XP_022880565.1	uncharacterized_LOC111397822	Olive	PF12906:RING-variant_domain	IPR027007:DHR-1 domain//IPR043162:Dedicator of cytokinesis, C-terminal, lobe C//IPR043161:Dedicator of cytokinesis, C-terminal, lobe A//IPR016024:Armadillo-type fold//IPR027357:DHR-2 domain
LOC111401134	210.973	0.797969	1.73865	0.195756	4.07634	4.58e-05	0.000130814	XP_022884488.1	UDP-glucuronate:xylan_alpha-glucuronosyltransferase_1,_transcript_variant_X4	Olive	PF01501:Glycosyl_transferase_family_8	IPR001680:WD40 repeat//IPR017986:WD40-repeat-containing domain//IPR036322:WD40-repeat-containing domain superfamily//IPR020472:G-protein beta WD-40 repeat//IPR015943:WD40/YVTN repeat-like-containing domain superfamily
LOC111369104	309.187	0.795904	1.73617	0.237647	3.3491	0.000810742	0.00193239	XP_022846358.1	stomatal_closure-related_actin-binding_protein_2-like,_transcript_variant_X2	Olive	PF16711:Actin-binding_domain_of_plant-specific_actin-binding_protein//PF16712:Coiled-coil_regions_of_plant-specific_actin-binding_protein//PF16709:Ig_domain_of_plant-specific_actin-binding_protein//PF17684:PH_domain_of_plant-specific_actin-binding_protein	IPR036093:NAC domain superfamily//IPR003441:NAC domain
LOC111401885	1414.6	0.795737	1.73596	0.154408	5.15348	2.56e-07	9.55e-07	XP_022885618.1	calcium_sensing_receptor,_chloroplastic	Olive		IPR018097:EGF-like calcium-binding, conserved site//IPR017441:Protein kinase, ATP binding site//IPR011009:Protein kinase-like domain superfamily//IPR001881:EGF-like calcium-binding domain//IPR000719:Protein kinase domain//IPR008271:Serine/threonine-protein kinase, active site//IPR000742:EGF-like domain
LOC111395249	231.626	0.790364	1.72951	0.195923	4.03406	5.48e-05	0.000155104	XP_022877002.1	probable_leucine-rich_repeat_receptor-like_protein_kinase_At1g35710	Olive	PF00560:Leucine_Rich_Repeat//PF12799:Leucine_Rich_repeats_(2_copies)//PF13855:Leucine_rich_repeat//PF13516:Leucine_Rich_repeat	IPR011990:Tetratricopeptide-like helical domain superfamily//IPR011333:SKP1/BTB/POZ domain superfamily//IPR000210:BTB/POZ domain
LOC111378362	477.648	0.789447	1.72841	0.151437	5.21303	1.86e-07	7.03e-07	XP_022857315.1	uncharacterized_LOC111378362,_transcript_variant_X3	Olive	PF10358:N-terminal_C2_in_EEIG1_and_EHBP1_proteins	IPR029063:S-adenosyl-L-methionine-dependent methyltransferase//IPR002052:DNA methylase, N-6 adenine-specific, conserved site
LOC111383883	160.28	0.786616	1.72502	0.260594	3.01855	0.00253989	0.00556439	XP_022863836.1	transmembrane_protein_184B,_transcript_variant_X3	Olive	PF03619:Organic_solute_transporter_Ostalpha	IPR004540:Translation elongation factor EFG/EF2//IPR035647:EF-G domain III/V-like//IPR035649:EFG, domain V//IPR000795:Transcription factor, GTP-binding domain//IPR005517:Translation elongation factor EFG/EF2, domain IV//IPR014721:Ribosomal protein S5 domain 2-type fold, subgroup//IPR009022:Elongation factor G, domain III//IPR000640:Elongation factor EFG, domain V-like//IPR009000:Translation prote…
LOC111372135	121.274	0.783667	1.7215	0.25221	3.1072	0.00188867	0.00423086	XP_022850088.1	ras-related_protein_RABA6b-like	Olive	PF00071:Ras_family	IPR036457:PPM-type phosphatase domain superfamily//IPR001932:PPM-type phosphatase domain
LOC111412274	624.898	0.783478	1.72128	0.13502	5.80267	6.53e-09	2.85e-08	XP_022898902.1	protein_WVD2-like_4	Olive	PF06886:Targeting_protein_for_Xklp2_(TPX2)	IPR007527:Zinc finger, SWIM-type//IPR006564:Zinc finger, PMZ-type
LOC111413003	286.43	0.782829	1.7205	0.195759	3.99894	6.36e-05	0.00017848	XP_022899650.1	protein_NRT1/_PTR_FAMILY_3.1-like,_transcript_variant_X2	Olive	PF00854:POT_family
LOC111390715	2909.7	0.780906	1.71821	0.145483	5.36768	7.98e-08	3.13e-07	XP_022871571.1	protein_SRG1-like,_transcript_variant_X3	Olive	PF03171:2OG-Fe(II)_oxygenase_superfamily//PF14226:non-haem_dioxygenase_in_morphine_synthesis_N-terminal	IPR032675:Leucine-rich repeat domain superfamily
LOC111374982	496.272	0.775492	1.71177	0.152226	5.09434	3.5e-07	1.29e-06	XP_022853514.1	phosphatase_IMPL1,_chloroplastic,_transcript_variant_X3	Olive	PF00459:Inositol_monophosphatase_family	IPR003578:Small GTPase Rho//IPR027417:P-loop containing nucleoside triphosphate hydrolase//IPR005225:Small GTP-binding protein domain
LOC111403114	218.827	0.77534	1.71159	0.198234	3.91124	9.18e-05	0.000251824	XP_022887270.1	phosphoglycerate_kinase-like,_transcript_variant_X7	Olive	PF00162:Phosphoglycerate_kinase
LOC111369017	395.799	0.773404	1.7093	0.167638	4.61353	3.96e-06	1.29e-05	XP_022846274.1	putative_late_blight_resistance_protein_homolog_R1B-8	Olive	PF00931:NB-ARC_domain	IPR018079:Ribosomal protein S4, conserved site//IPR001912:Ribosomal protein S4/S9, N-terminal//IPR005710:Ribosomal protein S4/S9, eukaryotic/archaeal//IPR036986:RNA-binding S4 domain superfamily//IPR002942:RNA-binding S4 domain
LOC111397507	143.964	0.772348	1.70805	0.231714	3.3332	0.000858525	0.0020392	XP_022880241.1	uncharacterized_LOC111397507,_transcript_variant_X2	Olive		IPR017907:Zinc finger, RING-type, conserved site//IPR001841:Zinc finger, RING-type//IPR013083:Zinc finger, RING/FYVE/PHD-type
LOC111385151	484.5	0.77116	1.70664	0.141527	5.44886	5.07e-08	2.03e-07	XP_022865293.1	probable_serine/threonine-protein_kinase_BSK3	Olive	PF07714:Protein_tyrosine_kinase
LOC111411664	507.1	0.769755	1.70498	0.16245	4.73842	2.15e-06	7.29e-06	XP_022897985.1	stomatal_closure-related_actin-binding_protein_1	Olive	PF17684:PH_domain_of_plant-specific_actin-binding_protein//PF16711:Actin-binding_domain_of_plant-specific_actin-binding_protein//PF16709:Ig_domain_of_plant-specific_actin-binding_protein//PF16712:Coiled-coil_regions_of_plant-specific_actin-binding_protein
LOC111378349	81.2254	0.769552	1.70474	0.311809	2.46803	0.0135861	0.025958	XP_022857298.1	uncharacterized_LOC111378349	Olive		IPR006121:Heavy metal-associated domain, HMA//IPR036163:Heavy metal-associated domain superfamily
LOC111405428	217.969	0.767874	1.70276	0.210498	3.64789	0.000264403	0.000678117			Olive		IPR001249:Acetyl-CoA biotin carboxyl carrier//IPR011053:Single hybrid motif//IPR001882:Biotin-binding site//IPR000089:Biotin/lipoyl attachment
LOC111377242	315.489	0.766993	1.70172	0.209698	3.65761	0.000254575	0.000654607	XP_022856072.1	3beta-hydroxysteroid-dehydrogenase/decarboxylase-like,_transcript_variant_X3	Olive	PF01073:3-beta_hydroxysteroid_dehydrogenase/isomerase_family	IPR007203:ORMDL family
LOC111365275	579.143	0.763143	1.69718	0.132808	5.74621	9.13e-09	3.93e-08	XP_022841487.1	auxin_efflux_carrier_component_1-like,_transcript_variant_X2	Olive	PF03547:Membrane_transport_protein	IPR000823:Plant peroxidase//IPR010255:Haem peroxidase superfamily//IPR002016:Haem peroxidase//IPR033905:Secretory peroxidase
LOC111407580	1366.08	0.761934	1.69576	0.141858	5.3711	7.83e-08	3.08e-07	XP_022892940.1	uncharacterized_LOC111407580,_transcript_variant_X6	Olive	PF13867:Sin3_binding_region_of_histone_deacetylase_complex_subunit_SAP30
LOC111365886	157.168	0.759774	1.69322	0.229015	3.31757	0.000908057	0.00214685	XP_022842180.1	uracil_phosphoribosyltransferase	Olive	PF14681:Uracil_phosphoribosyltransferase	IPR000719:Protein kinase domain//IPR017441:Protein kinase, ATP binding site//IPR008271:Serine/threonine-protein kinase, active site//IPR011009:Protein kinase-like domain superfamily
LOC111384486	291.399	0.75888	1.69218	0.200374	3.78733	0.000152276	0.00040439	XP_022864529.1	probable_methyltransferase_PMT6	Olive	PF03141:Putative_S-adenosyl-L-methionine-dependent_methyltransferase	IPR036881:Glycoside hydrolase family 3 C-terminal domain superfamily//IPR001764:Glycoside hydrolase, family 3, N-terminal//IPR017853:Glycoside hydrolase superfamily//IPR036962:Glycoside hydrolase, family 3, N-terminal domain superfamily
LOC111397544	576.73	0.758029	1.69118	0.193451	3.91846	8.91e-05	0.000245095	XP_022880300.1	protein_CURVATURE_THYLAKOID_1B,_chloroplastic-like	Olive	PF14159:CAAD_domains_of_cyanobacterial_aminoacyl-tRNA_synthetase	IPR004648:Tetrapeptide transporter, OPT1/isp4//IPR004813:Oligopeptide transporter, OPT superfamily
LOC111410729	617.574	0.757982	1.69112	0.14603	5.19061	2.1e-07	7.89e-07	XP_022896987.1	transmembrane_protein_87A-like,_transcript_variant_X2	Olive	PF06814:Lung_seven_transmembrane_receptor
LOC111390030	8325.83	0.756181	1.68901	0.10908	6.93233	4.14e-12	2.31e-11	XP_022870789.1	aquaporin_PIP1-1	Olive	PF00230:Major_intrinsic_protein
LOC111374743	178.636	0.755949	1.68874	0.205887	3.67168	0.000240964	0.0006217		CRS2-associated_factor_2,_chloroplastic	Olive		IPR027469:Cation efflux transmembrane domain superfamily//IPR002524:Cation efflux protein//IPR036837:Cation efflux protein, cytoplasmic domain superfamily
LOC111394644	416.242	0.755095	1.68774	0.172052	4.38875	1.14e-05	3.51e-05	XP_022876324.1	mitotic_checkpoint_protein_BUB3.1	Olive	PF00400:WD_domain,_G-beta_repeat	IPR016181:Acyl-CoA N-acyltransferase//IPR017137:Arginine-tRNA-protein transferase 1, eukaryotic
LOC111408353	88.9624	0.754967	1.68759	0.310072	2.43481	0.0148996	0.0281969	XP_022893889.1	probable_phytol_kinase_1,_chloroplastic	Olive		IPR002769:Translation initiation factor IF6
LOC111369802	150.088	0.753564	1.68595	0.25911	2.90828	0.00363421	0.00774686	XP_022847234.1	vacuolar_protein_sorting-associated_protein_51_homolog,_transcript_variant_X9	Olive		IPR001283:Cysteine-rich secretory protein-related//IPR014044:CAP domain//IPR035940:CAP superfamily//IPR018244:Allergen V5/Tpx-1-related, conserved site
LOC111383025	1719.69	0.752247	1.68441	0.16524	4.55246	5.3e-06	1.7e-05	XP_022862849.1	PLAT_domain-containing_protein_3-like	Olive	PF01477:PLAT/LH2_domain	IPR029044:Nucleotide-diphospho-sugar transferases
LOC111405062	582.95	0.751211	1.68321	0.14401	5.21638	1.82e-07	6.91e-07	XP_022889521.1	calcium-dependent_protein_kinase_13	Olive	PF13499:EF-hand_domain_pair//PF00069:Protein_kinase_domain	IPR043502:DNA/RNA polymerase superfamily
LOC111384310	225.26	0.750328	1.68217	0.207025	3.62433	0.000289707	0.000739293	XP_022864346.1	inactive_LRR_receptor-like_serine/threonine-protein_kinase_BIR2	Olive	PF13855:Leucine_rich_repeat
LOC111406646	131.133	0.750314	1.68216	0.26399	2.84221	0.00448022	0.00940304		VAN3-binding_protein-like	Olive
LOC111410150	190.002	0.749875	1.68165	0.209561	3.57831	0.000345826	0.000871654	XP_022896141.1	triacylglycerol_lipase_1-like,_transcript_variant_X3	Olive		IPR035892:C2 domain superfamily//IPR000008:C2 domain//IPR031468:Synaptotagmin-like mitochondrial-lipid-binding domain
LOC111385270	237.626	0.749661	1.6814	0.21784	3.44133	0.000578851	0.00140955	XP_022865419.1	heat_shock_factor_protein_HSF30-like	Olive	PF00447:HSF-type_DNA-binding	IPR036869:Chaperone J-domain superfamily//IPR001623:DnaJ domain
LOC111405683	346.509	0.749594	1.68132	0.170295	4.40174	1.07e-05	3.32e-05	XP_022890451.1	cellulose_synthase-like_protein_D3	Olive	PF14570:RING/Ubox_like_zinc-binding_domain//PF03552:Cellulose_synthase	IPR010720:Alpha-L-arabinofuranosidase, C-terminal//IPR008979:Galactose-binding-like domain superfamily//IPR013780:Glycosyl hydrolase, all-beta//IPR017853:Glycoside hydrolase superfamily
LOC111385315	322.788	0.748164	1.67965	0.280387	2.66832	0.00762307	0.0153305		uncharacterized_LOC111385315	Olive		IPR002935:Class I-like SAM-dependent O-methyltransferase//IPR029063:S-adenosyl-L-methionine-dependent methyltransferase
LOC111399517	274.239	0.747238	1.67858	0.198032	3.77331	0.000161093	0.000426592	XP_022882651.1	uncharacterized_LOC111399517,_transcript_variant_X2	Olive		IPR036249:Thioredoxin-like superfamily//IPR013766:Thioredoxin domain
LOC111396777	456.417	0.745279	1.6763	0.196494	3.79289	0.000148905	0.000396016	XP_022879055.1	E3_ubiquitin_ligase_BIG_BROTHER-like	Olive	PF13639:Ring_finger_domain	IPR012386:2',3'-cyclic-nucleotide 3'-phosphodiesterase//IPR009097:Cyclic phosphodiesterase
LOC111410114	504.121	0.745101	1.67609	0.180011	4.13919	3.49e-05	0.000101135	XP_022896087.1	peptidyl-prolyl_cis-trans_isomerase_CYP21-1-like	Olive	PF00160:Cyclophilin_type_peptidyl-prolyl_cis-trans_isomerase/CLD	IPR001781:Zinc finger, LIM-type
LOC111366294	204.244	0.741987	1.67248	0.265805	2.79147	0.00524689	0.0108851	XP_022842790.1	60S_acidic_ribosomal_protein_P3-like	Olive	PF00428:60s_Acidic_ribosomal_protein
LOC111404247	250.676	0.741468	1.67188	0.21146	3.50642	0.000454185	0.00112331			Olive		IPR013766:Thioredoxin domain//IPR005792:Protein disulphide isomerase//IPR036249:Thioredoxin-like superfamily//IPR005788:Disulphide isomerase//IPR017937:Thioredoxin, conserved site
LOC111410002	527.618	0.740299	1.67052	0.180701	4.09681	4.19e-05	0.000120342	XP_022895922.1	probable_lactoylglutathione_lyase,_chloroplastic,_transcript_variant_X2	Olive	PF00903:Glyoxalase/Bleomycin_resistance_protein/Dioxygenase_superfamily	IPR036770:Ankyrin repeat-containing domain superfamily//IPR002110:Ankyrin repeat//IPR020683:Ankyrin repeat-containing domain
LOC111396742	1755.46	0.738204	1.6681	0.119054	6.20058	5.63e-10	2.68e-09	XP_022879006.1	calvin_cycle_protein_CP12-3,_chloroplastic	Olive	PF02672:CP12_domain
LOC111375788	88.8933	0.732934	1.66202	0.292758	2.50355	0.0122953	0.0237223	XP_022854450.1	probable_galacturonosyltransferase_10,_transcript_variant_X2	Olive	PF01501:Glycosyl_transferase_family_8	IPR011009:Protein kinase-like domain superfamily
LOC111400991	1287.21	0.732868	1.66194	0.116499	6.29075	3.16e-10	1.53e-09	XP_022884267.1	formamidase-like,_transcript_variant_X2	Olive	PF03069:Acetamidase/Formamidase_family	IPR002306:Tryptophan-tRNA ligase//IPR024109:Tryptophan-tRNA ligase, bacterial-type//IPR001412:Aminoacyl-tRNA synthetase, class I, conserved site//IPR014729:Rossmann-like alpha/beta/alpha sandwich fold
LOC111380428	3296.2	0.732456	1.66146	0.113572	6.44925	1.12e-10	5.65e-10	XP_022859760.1	auxin-responsive_protein_IAA9-like,_transcript_variant_X5	Olive	PF02309:AUX/IAA_family
LOC111394806	3485.4	0.731315	1.66015	0.119809	6.104	1.03e-09	4.83e-09	XP_022876575.1	epoxide_hydrolase_A-like,_transcript_variant_X2	Olive	PF12697:Alpha/beta_hydrolase_family
LOC111380157	138.484	0.729476	1.65804	0.268982	2.71198	0.00668817	0.0136033	XP_022859409.1	ribosomal_RNA_small_subunit_methyltransferase,_chloroplastic	Olive	PF00398:Ribosomal_RNA_adenine_dimethylase	IPR014403:Vegetative storage protein/acid phosphatase//IPR010028:Acid phosphatase, plant//IPR023214:HAD superfamily//IPR036412:HAD-like superfamily
LOC111380283	297.785	0.729015	1.65751	0.168709	4.32114	1.55e-05	4.7e-05	XP_022859563.1	signal_peptide_peptidase-like_4	Olive	PF04258:Signal_peptide_peptidase	IPR000850:Adenylate kinase/UMP-CMP kinase//IPR027417:P-loop containing nucleoside triphosphate hydrolase
LOC111389299	154.446	0.725307	1.65325	0.26066	2.78257	0.00539295	0.0111656		uncharacterized_protein_LOC111389299	Olive		IPR035669:GDSL lipase/esterase-like, plant//IPR036514:SGNH hydrolase superfamily
LOC111410557	190.65	0.724508	1.65234	0.204806	3.53753	0.000403889	0.00100728	XP_022896732.1	eukaryotic_translation_initiation_factor_4B3-like	Olive	PF06273:Plant_specific_eukaryotic_initiation_factor_4B	IPR013763:Cyclin-like//IPR036915:Cyclin-like superfamily
LOC111389793	354.438	0.72292	1.65052	0.199411	3.62527	0.00028866	0.000736734	XP_022870531.1	replication_factor_C_subunit_3	Olive	PF13177:DNA_polymerase_III,_delta_subunit
LOC111381380	211.326	0.720075	1.64727	0.192838	3.73408	0.0001884	0.000494041	XP_022860926.1	tyrosine-specific_transport_protein-like	Olive	PF03222:Tryptophan/tyrosine_permease_family	IPR002347:Short-chain dehydrogenase/reductase SDR//IPR036291:NAD(P)-binding domain superfamily
LOC111377022	452.62	0.719807	1.64696	0.150675	4.77721	1.78e-06	6.08e-06	XP_022855806.1	pentatricopeptide_repeat-containing_protein_At1g02370,_mitochondrial-like	Olive	PF13041:PPR_repeat_family//PF01535:PPR_repeat	IPR002885:Pentatricopeptide repeat//IPR011990:Tetratricopeptide-like helical domain superfamily
LOC111402541	99.8638	0.715366	1.6419	0.282553	2.53179	0.011348	0.0220515	XP_022886689.1	uncharacterized_LOC111402541,_transcript_variant_X7	Olive		IPR032675:Leucine-rich repeat domain superfamily//IPR003591:Leucine-rich repeat, typical subtype
LOC111397205	470.764	0.711301	1.63728	0.15608	4.55728	5.18e-06	1.67e-05	XP_022879757.1	IST1-like_protein	Olive	PF03398:Regulator_of_Vps4_activity_in_the_MVB_pathway	IPR019786:Zinc finger, PHD-type, conserved site//IPR019787:Zinc finger, PHD-finger//IPR013083:Zinc finger, RING/FYVE/PHD-type//IPR011011:Zinc finger, FYVE/PHD-type//IPR034732:Extended PHD (ePHD) domain//IPR001965:Zinc finger, PHD-type
LOC111389259	511.277	0.709129	1.63482	0.139762	5.07382	3.9e-07	1.43e-06	XP_022869934.1	ubiquitin_carboxyl-terminal_hydrolase_15,_transcript_variant_X3	Olive	PF00443:Ubiquitin_carboxyl-terminal_hydrolase//PF01753:MYND_finger	IPR000326:Phosphatidic acid phosphatase type 2/haloperoxidase//IPR036938:Phosphatidic acid phosphatase type 2/haloperoxidase superfamily
LOC111376721	482.81	0.709105	1.63479	0.14765	4.8026	1.57e-06	5.39e-06	XP_022855467.1	myosin-binding_protein_2-like	Olive	PF04576:Zein-binding	IPR036869:Chaperone J-domain superfamily//IPR018253:DnaJ domain, conserved site//IPR001623:DnaJ domain
LOC111391251	5590.39	0.708938	1.6346	0.138136	5.13219	2.86e-07	1.07e-06	XP_022872189.1	UDP-arabinopyranose_mutase_2-like	Olive	PF03214:Reversibly_glycosylated_polypeptide	IPR019762:Dynamin, GTPase region, conserved site//IPR003130:Dynamin GTPase effector//IPR011993:PH-like domain superfamily//IPR027417:P-loop containing nucleoside triphosphate hydrolase//IPR001849:Pleckstrin homology domain//IPR030381:Dynamin-type guanine nucleotide-binding (G) domain//IPR022812:Dynamin superfamily//IPR001401:Dynamin, GTPase domain//IPR020850:GTPase effector domain
LOC111371244	86.9714	0.708171	1.63373	0.292887	2.4179	0.0156104	0.029418	XP_022848903.1	uncharacterized_LOC111371244	Olive	PF08284:Retroviral_aspartyl_protease//PF03732:Retrotransposon_gag_protein//PF17921:Integrase_zinc_binding_domain//PF00078:Reverse_transcriptase_(RNA-dependent_DNA_polymerase)//PF00665:Integrase_core_domain	IPR002467:Peptidase M24A, methionine aminopeptidase, subfamily 1//IPR036005:Creatinase/aminopeptidase-like//IPR001714:Peptidase M24, methionine aminopeptidase
LOC111380127	412.005	0.707624	1.63311	0.153974	4.59573	4.31e-06	1.4e-05	XP_022859370.1	glucan_endo-1,3-beta-glucosidase_4-like,_transcript_variant_X3	Olive	PF00332:Glycosyl_hydrolases_family_17//PF07983:X8_domain	IPR002143:Ribosomal protein L1//IPR028364:Ribosomal protein L1/ribosomal biogenesis protein//IPR023674:Ribosomal protein L1-like//IPR016095:Ribosomal protein L1, 3-layer alpha/beta-sandwich//IPR023673:Ribosomal protein L1, conserved site
LOC111377609	69.7167	0.704169	1.62921	0.320593	2.19646	0.0280593	0.0497739	XP_022856505.1	UDP-glycosyltransferase_76B1-like	Olive	PF00201:UDP-glucoronosyl_and_UDP-glucosyl_transferase
LOC111365350	326.929	0.700503	1.62507	0.180512	3.88063	0.000104184	0.000283343	XP_022841600.1	transcription_factor_TCP7-like	Olive	PF03634:TCP_family_transcription_factor	IPR018783:Transcription factor, enhancer of yellow 2//IPR038212:Transcription factor EnY2 superfamily
LOC111384812	223.547	0.698866	1.62323	0.232375	3.00749	0.00263415	0.00575664		putative_calcium-transporting_ATPase_11,_plasma_membrane-type	Olive
LOC111384178	317.035	0.698424	1.62273	0.175927	3.96997	7.19e-05	0.000200338	XP_022864205.1	proteasome_assembly_chaperone_2	Olive	PF09754:PAC2_family	IPR009078:Ferritin-like superfamily//IPR012347:Ferritin-like//IPR009040:Ferritin-like diiron domain
LOC111381423	2343.67	0.698205	1.62248	0.155771	4.48225	7.39e-06	2.33e-05	XP_022860972.1	4-hydroxy-3-methylbut-2-enyl_diphosphate_reductase,_chloroplastic-like	Olive	PF02401:LytB_protein	IPR005123:Oxoglutarate/iron-dependent dioxygenase//IPR027443:Isopenicillin N synthase-like
LOC111402178	131.916	0.695339	1.61926	0.249214	2.79013	0.00526876	0.0109264	XP_022886098.1	BTB/POZ_domain-containing_protein_At5g03250-like	Olive	PF03000:NPH3_family//PF00651:BTB/POZ_domain
LOC111405091	171.082	0.69242	1.61599	0.241994	2.86131	0.00421897	0.0088947	XP_022889579.1	U2_small_nuclear_ribonucleoprotein_B'',_transcript_variant_X2	Olive	PF00076:RNA_recognition_motif._(a.k.a._RRM,_RBD,_or_RNP_domain)	IPR000232:Heat shock factor (HSF)-type, DNA-binding//IPR036390:Winged helix DNA-binding domain superfamily//IPR036388:Winged helix-like DNA-binding domain superfamily
LOC111407461	600.951	0.69192	1.61543	0.182854	3.784	0.000154328	0.000409547	XP_022892712.1	mechanosensitive_ion_channel_protein_10-like	Olive	PF00924:Mechanosensitive_ion_channel
LOC111368489	240.275	0.69046	1.6138	0.18483	3.73565	0.000187227	0.00049112	XP_022845518.1	probable_LRR_receptor-like_serine/threonine-protein_kinase_At1g63430,_transcript_variant_X6	Olive	PF08263:Leucine_rich_repeat_N-terminal_domain//PF07714:Protein_tyrosine_kinase	IPR005175:PPC domain
LOC111397470	1381.02	0.689484	1.61271	0.124134	5.55436	2.79e-08	1.15e-07	XP_022880182.1	flavonol_synthase/flavanone_3-hydroxylase-like	Olive	PF03171:2OG-Fe(II)_oxygenase_superfamily//PF14226:non-haem_dioxygenase_in_morphine_synthesis_N-terminal
LOC111395984	157.727	0.689299	1.6125	0.25872	2.66426	0.00771572	0.0155029	XP_022877993.1	protein_HEAT-STRESS-ASSOCIATED_32	Olive	PF02679:(2R)-phospho-3-sulfolactate_synthase_(ComA)	IPR015915:Kelch-type beta propeller//IPR006652:Kelch repeat type 1//IPR036047:F-box-like domain superfamily
LOC111370715	280.657	0.688151	1.61122	0.170982	4.02471	5.7e-05	0.00016115	XP_022848323.1	uncharacterized_protein_At4g15545-like	Olive		IPR006594:LIS1 homology motif
LOC111377276	261.732	0.687393	1.61037	0.201989	3.40313	0.000666192	0.0016063	XP_022856116.1	phosphoinositide_phospholipase_C_2-like	Olive	PF09279:Phosphoinositide-specific_phospholipase_C,_efhand-like//PF00388:Phosphatidylinositol-specific_phospholipase_C,_X_domain	IPR006571:TLDc domain
LOC111376077	1806.34	0.686495	1.60937	0.113426	6.05237	1.43e-09	6.58e-09	XP_022854773.1	lysine-rich_arabinogalactan_protein_18-like	Olive
LOC111412574	433.551	0.686194	1.60903	0.207168	3.31226	0.000925443	0.00218365	XP_022899278.1	proline_iminopeptidase	Olive	PF00561:alpha/beta_hydrolase_fold
LOC111393759	506.597	0.68566	1.60844	0.180735	3.79373	0.0001484	0.000394835	XP_022875218.1	cytochrome_b561_and_DOMON_domain-containing_protein_At3g25290-like	Olive	PF04526:Protein_of_unknown_function_(DUF568)//PF03188:Eukaryotic_cytochrome_b561	IPR022357:Major intrinsic protein, conserved site//IPR023271:Aquaporin-like//IPR000425:Major intrinsic protein
LOC111376454	447.387	0.68544	1.60819	0.168431	4.06956	4.71e-05	0.000134474	XP_022855181.1	LIM_domain-containing_protein_WLIM2b-like,_transcript_variant_X2	Olive	PF00412:LIM_domain
LOC111370933	190.818	0.685027	1.60773	0.203545	3.36548	0.000764102	0.00182757	XP_022848608.1	ornithine_carbamoyltransferase,_chloroplastic-like	Olive	PF02729:Aspartate/ornithine_carbamoyltransferase,_carbamoyl-P_binding_domain//PF00185:Aspartate/ornithine_carbamoyltransferase,_Asp/Orn_binding_domain
LOC111401140	149.803	0.678207	1.60015	0.292611	2.31778	0.0204613	0.0375639	XP_022884506.1	lipoate--protein_ligase-like,_transcript_variant_X3	Olive		IPR029055:Nucleophile aminohydrolases, N-terminal//IPR024286:Domain of unknown function DUF3700
LOC111385007	635.729	0.677323	1.59917	0.141335	4.79233	1.65e-06	5.66e-06	XP_022865124.1	copper_methylamine_oxidase-like	Olive	PF02727:Copper_amine_oxidase,_N2_domain//PF02728:Copper_amine_oxidase,_N3_domain//PF01179:Copper_amine_oxidase,_enzyme_domain	IPR002401:Cytochrome P450, E-class, group I//IPR036396:Cytochrome P450 superfamily//IPR017972:Cytochrome P450, conserved site//IPR001128:Cytochrome P450
LOC111387872	105.027	0.673334	1.59475	0.283191	2.37767	0.0174224	0.0324832	XP_022868237.1	UPF0235_protein_At5g63440-like	Olive	PF02594:Uncharacterised_ACR,_YggU_family_COG1872
LOC111395621	565.689	0.672905	1.59428	0.143427	4.69163	2.71e-06	9.04e-06	XP_022877474.1	uncharacterized_LOC111395621	Olive
LOC111393805	160.736	0.672367	1.59369	0.216632	3.10373	0.00191098	0.00427798	XP_022875285.1	F-box/kelch-repeat_protein_At1g55270-like,_transcript_variant_X3	Olive	PF00646:F-box_domain//PF01344:Kelch_motif	IPR005937:26S proteasome regulatory subunit P45-like//IPR003593:AAA+ ATPase domain//IPR027417:P-loop containing nucleoside triphosphate hydrolase//IPR003960:ATPase, AAA-type, conserved site
LOC111405337	306.933	0.672138	1.59343	0.204412	3.28815	0.00100846	0.00236396	XP_022889932.1	protein_PAM71-homolog,_chloroplastic	Olive	PF01169:Uncharacterized_protein_family_UPF0016	IPR029044:Nucleotide-diphospho-sugar transferases
LOC111365417	1405.86	0.670391	1.5915	0.176766	3.79254	0.000149116	0.000396435	XP_022841711.1	B2_protein-like,_transcript_variant_X2	Olive	PF10539:Development_and_cell_death_domain	IPR023214:HAD superfamily//IPR004274:FCP1 homology domain//IPR036412:HAD-like superfamily//IPR011948:Dullard phosphatase domain, eukaryotic
LOC111405094	371.021	0.66934	1.59034	0.174144	3.84359	0.000121249	0.000326426	XP_022889581.1	PRA1_family_protein_F2-like	Olive	PF03208:PRA1_family_protein	IPR012820:Sucrose synthase, plant/cyanobacteria
LOC111374565	157.448	0.668405	1.58932	0.247711	2.69833	0.00696892	0.0141179	XP_022853015.1	60S_ribosomal_protein_L39-3	Olive	PF00832:Ribosomal_L39_protein	IPR016092:FeS cluster insertion protein//IPR035903:HesB-like domain superfamily
LOC111410053	4324.49	0.661495	1.58172	0.102995	6.42257	1.34e-10	6.69e-10	XP_022895981.1	SKP1-like_protein_1A	Olive	PF01466:Skp1_family,_dimerisation_domain//PF03931:Skp1_family,_tetramerisation_domain
LOC111396212	99.952	0.659256	1.57927	0.277041	2.37964	0.0173297	0.0323373	XP_022878335.1	protein_root_UVB_sensitive_3-like,_transcript_variant_X3	Olive	PF04884:Vitamin_B6_photo-protection_and_homoeostasis	IPR011009:Protein kinase-like domain superfamily//IPR008271:Serine/threonine-protein kinase, active site//IPR000719:Protein kinase domain//IPR017441:Protein kinase, ATP binding site
LOC111392868	497.328	0.658788	1.57876	0.180112	3.65766	0.000254529	0.000654538	XP_022874041.1	oleoyl-acyl_carrier_protein_thioesterase,_chloroplastic-like	Olive	PF01643:Acyl-ACP_thioesterase	IPR017986:WD40-repeat-containing domain//IPR001680:WD40 repeat//IPR015943:WD40/YVTN repeat-like-containing domain superfamily//IPR020472:G-protein beta WD-40 repeat//IPR036322:WD40-repeat-containing domain superfamily
LOC111372276	177.44	0.657747	1.57762	0.212501	3.09527	0.00196634	0.00439343	XP_022850295.1	TITAN-like_protein	Olive	PF14968:Coiled_coil_protein_84	IPR010409:GAGA-binding transcriptional activator
LOC111397270	401.42	0.657686	1.57755	0.162634	4.04398	5.26e-05	0.000149121	XP_022879874.1	protein_TIC_22,_chloroplastic,_transcript_variant_X3	Olive	PF04278:Tic22-like_family	IPR001680:WD40 repeat//IPR015943:WD40/YVTN repeat-like-containing domain superfamily//IPR017986:WD40-repeat-containing domain//IPR036322:WD40-repeat-containing domain superfamily
LOC111380460	906.142	0.656374	1.57612	0.119344	5.49985	3.8e-08	1.54e-07	XP_022859803.1	auxin_response_factor_8-like,_transcript_variant_X3	Olive	PF02362:B3_DNA_binding_domain//PF06507:Auxin_response_factor
LOC111387146	585.186	0.654317	1.57387	0.136679	4.78724	1.69e-06	5.8e-06	XP_022867449.1	vestitone_reductase-like	Olive	PF01370:NAD_dependent_epimerase/dehydratase_family
LOC111389863	128.675	0.653445	1.57292	0.253352	2.57919	0.00990309	0.0194835		uncharacterized_LOC111389863,_transcript_variant_X5	Olive		IPR006861:Hyaluronan/mRNA-binding protein
LOC111395289	175.221	0.652226	1.57159	0.214756	3.03706	0.00238896	0.00525943	XP_022877055.1	BTB/POZ_domain-containing_protein_At1g67900-like,_transcript_variant_X4	Olive	PF03000:NPH3_family	IPR013083:Zinc finger, RING/FYVE/PHD-type//IPR001841:Zinc finger, RING-type
LOC111393704	719.166	0.647414	1.56636	0.140429	4.61026	4.02e-06	1.31e-05	XP_022875137.1	uncharacterized_LOC111393704	Olive		IPR000719:Protein kinase domain//IPR011009:Protein kinase-like domain superfamily//IPR020683:Ankyrin repeat-containing domain//IPR002110:Ankyrin repeat//IPR008271:Serine/threonine-protein kinase, active site//IPR036770:Ankyrin repeat-containing domain superfamily
LOC111381566	143.928	0.646816	1.56571	0.283864	2.27862	0.0226899	0.0411809	XP_022861127.1	putative_cyclin-D6-1	Olive	PF02984:Cyclin,_C-terminal_domain//PF00134:Cyclin,_N-terminal_domain
LOC111396701	226.21	0.646618	1.56549	0.195109	3.31414	0.000919263	0.00217074	XP_022878937.1	probable_sugar_phosphate/phosphate_translocator_At3g17430,_transcript_variant_X4	Olive	PF03151:Triose-phosphate_Transporter_family	IPR029068:Glyoxalase/Bleomycin resistance protein/Dihydroxybiphenyl dioxygenase
LOC111380496	98.1639	0.646609	1.56548	0.294381	2.19651	0.0280558	0.0497729	XP_022859848.1	17.3_kDa_class_I_heat_shock_protein-like	Olive	PF00011:Hsp20/alpha_crystallin_family
LOC111406599	228.664	0.64657	1.56544	0.195109	3.31389	0.000920065	0.00217239	XP_022891758.1	importin_subunit_beta-1-like	Olive	PF03810:Importin-beta_N-terminal_domain//PF13513:HEAT-like_repeat
LOC111382980	366.651	0.645797	1.5646	0.154498	4.17998	2.92e-05	8.54e-05		stem-specific_protein_TSJT1-like	Olive		IPR017937:Thioredoxin, conserved site//IPR036249:Thioredoxin-like superfamily//IPR013766:Thioredoxin domain
LOC111386988	237.073	0.643558	1.56218	0.192028	3.35137	0.000804133	0.00191782	XP_022867266.1	uncharacterized_LOC111386988	Olive
LOC111370805	416.522	0.642954	1.56152	0.164877	3.8996	9.64e-05	0.000263422	XP_022848449.1	30S_ribosomal_protein_S20,_chloroplastic-like	Olive	PF01649:Ribosomal_protein_S20	IPR010167:Amino-acid N-acetyltransferase//IPR036393:Acetylglutamate kinase-like superfamily//IPR037528:Acetylglutamate kinase ArgB//IPR001057:Glutamate/acetylglutamate kinase//IPR004662:Acetylglutamate kinase family//IPR041727:N-Acetyl-L-glutamate kinase, cyclic
LOC111373395	2044.1	0.639621	1.55792	0.135729	4.71249	2.45e-06	8.22e-06	XP_022851690.1	probable_cellulose_synthase_A_catalytic_subunit_1_[UDP-forming]	Olive	PF03552:Cellulose_synthase
LOC111378545	170.971	0.639532	1.55782	0.215692	2.96502	0.00302659	0.0065374	XP_022857530.1	glutamate_receptor_3.3-like	Olive	PF00060:Ligand-gated_ion_channel//PF00497:Bacterial_extracellular_solute-binding_proteins,_family_3
LOC111409915	114.164	0.639157	1.55742	0.249353	2.56327	0.0103693	0.0203092	XP_022895793.1	probable_WRKY_transcription_factor_30	Olive	PF03106:WRKY_DNA_-binding_domain
LOC111388391	4054.96	0.63796	1.55613	0.120604	5.28971	1.23e-07	4.73e-07		photosystem_I_reaction_center_subunit_II,_chloroplastic-like	Olive		IPR036523:SurE-like phosphatase/nucleotidase superfamily//IPR002828:Survival protein SurE-like phosphatase/nucleotidase
LOC111380846	185.669	0.636967	1.55506	0.210237	3.02976	0.00244747	0.0053791	XP_022860274.1	cell_division_protein_FtsZ_homolog_2-1,_chloroplastic-like,_transcript_variant_X2	Olive	PF12327:FtsZ_family,_C-terminal_domain//PF00091:Tubulin/FtsZ_family,_GTPase_domain
LOC111388019	522.183	0.635947	1.55396	0.139647	4.55396	5.26e-06	1.69e-05	XP_022868444.1	probable_methyltransferase_PMT20,_transcript_variant_X2	Olive	PF03141:Putative_S-adenosyl-L-methionine-dependent_methyltransferase	IPR000008:C2 domain//IPR035892:C2 domain superfamily
LOC111365371	205.603	0.63457	1.55248	0.252925	2.50893	0.0121098	0.0233979		uncharacterized_LOC111365371	Olive		IPR001680:WD40 repeat//IPR006594:LIS1 homology motif//IPR020472:G-protein beta WD-40 repeat//IPR015943:WD40/YVTN repeat-like-containing domain superfamily//IPR036322:WD40-repeat-containing domain superfamily//IPR019775:WD40 repeat, conserved site//IPR017986:WD40-repeat-containing domain
LOC111376983	438.298	0.633827	1.55168	0.199234	3.18133	0.00146602	0.00334376	XP_022855769.1	ATP-dependent_RNA_helicase-like_protein_DB10,_transcript_variant_X5	Olive	PF00270:DEAD/DEAH_box_helicase//PF00271:Helicase_conserved_C-terminal_domain	IPR036354:Proteinase inhibitor I13, potato inhibitor I superfamily
LOC111402518	1521.87	0.632719	1.55048	0.164888	3.83726	0.000124416	0.000334444	XP_022886655.1	uncharacterized_LOC111402518,_transcript_variant_X2	Olive	PF04117:Mpv17_/_PMP22_family	IPR002885:Pentatricopeptide repeat//IPR011990:Tetratricopeptide-like helical domain superfamily//IPR036249:Thioredoxin-like superfamily//IPR004045:Glutathione S-transferase, N-terminal//IPR010987:Glutathione S-transferase, C-terminal-like//IPR036282:Glutathione S-transferase, C-terminal domain superfamily
LOC111368854	318.81	0.632425	1.55017	0.166703	3.79372	0.000148408	0.000394835	XP_022846100.1	ethylene-responsive_transcription_factor_ERF011-like	Olive	PF00847:AP2_domain	IPR023271:Aquaporin-like//IPR022357:Major intrinsic protein, conserved site//IPR000425:Major intrinsic protein
LOC111397254	228.729	0.630665	1.54828	0.210417	2.99721	0.0027246	0.00593851	XP_022879854.1	uncharacterized_LOC111397254,_transcript_variant_X3	Olive		IPR005175:PPC domain
LOC111367211	568.623	0.629905	1.54746	0.149981	4.19991	2.67e-05	7.86e-05	XP_022843734.1	probable_cadmium/zinc-transporting_ATPase_HMA1,_chloroplastic	Olive	PF00122:E1-E2_ATPase//PF00702:haloacid_dehalogenase-like_hydrolase	IPR000682:Protein-L-isoaspartate(D-aspartate) O-methyltransferase//IPR029063:S-adenosyl-L-methionine-dependent methyltransferase
LOC111372603	1078.14	0.62969	1.54723	0.121762	5.17146	2.32e-07	8.71e-07	XP_022850742.1	SNF1-related_protein_kinase_catalytic_subunit_alpha_KIN10	Olive	PF02149:Kinase_associated_domain_1//PF00069:Protein_kinase_domain//PF00627:UBA/TS-N_domain	IPR002942:RNA-binding S4 domain
LOC111394445	501.697	0.629269	1.54678	0.154268	4.07908	4.52e-05	0.000129326	XP_022876041.1	vacuolar_protein_sorting-associated_protein_35B-like,_transcript_variant_X4	Olive	PF03635:Vacuolar_protein_sorting-associated_protein_35	IPR001494:Importin-beta, N-terminal domain//IPR011989:Armadillo-like helical//IPR016024:Armadillo-type fold
LOC111380056	1349.57	0.624666	1.54185	0.162445	3.8454	0.000120358	0.000324296	XP_022859290.1	nitrate_regulatory_gene2_protein-like	Olive	PF04782:Protein_of_unknown_function_(DUF632)//PF04783:Protein_of_unknown_function_(DUF630)	IPR007527:Zinc finger, SWIM-type//IPR006564:Zinc finger, PMZ-type
LOC111402511	393.084	0.62446	1.54163	0.255189	2.44705	0.014403	0.0273712	XP_022886646.1	organelle_RRM_domain-containing_protein_2,_mitochondrial-like	Olive	PF00076:RNA_recognition_motif._(a.k.a._RRM,_RBD,_or_RNP_domain)
LOC111393158	446.142	0.621104	1.53805	0.151834	4.09069	4.3e-05	0.000123323	XP_022874318.1	BTB/POZ_domain-containing_protein_At3g05675-like	Olive	PF00651:BTB/POZ_domain	IPR035595:UDP-glycosyltransferase family, conserved site
LOC111374885	2004.43	0.619672	1.53653	0.105849	5.85433	4.79e-09	2.12e-08	XP_022853412.1	subtilisin-like_protease_SBT1.6	Olive	PF02225:PA_domain//PF00082:Subtilase_family//PF05922:Peptidase_inhibitor_I9//PF17766:Fibronectin_type-III_domain
LOC111398835	493.707	0.619469	1.53631	0.141818	4.36805	1.25e-05	3.85e-05	XP_022881714.1	protein_NSP-INTERACTING_KINASE_3-like	Olive	PF00069:Protein_kinase_domain//PF08263:Leucine_rich_repeat_N-terminal_domain//PF13855:Leucine_rich_repeat
LOC111367963	163.037	0.618681	1.53547	0.229699	2.69344	0.00707194	0.0143111	XP_022844881.1	3-dehydroquinate_synthase_homolog,_transcript_variant_X9	Olive	PF01959:3-dehydroquinate_synthase_II	IPR037143:4'-phosphopantetheinyl transferase domain superfamily
LOC111368653	1056.77	0.611414	1.52776	0.157575	3.88015	0.000104393	0.000283818	XP_022845790.1	ATP-dependent_6-phosphofructokinase_6-like	Olive	PF00365:Phosphofructokinase
LOC111374868	244.988	0.610689	1.52699	0.218322	2.79719	0.00515486	0.01071	XP_022853392.1	early_nodulin-93,_transcript_variant_X2	Olive	PF03386:Early_nodulin_93_ENOD93_protein
LOC111392621	140.345	0.610423	1.52671	0.242661	2.51554	0.0118851	0.0230034	XP_022873759.1	uncharacterized_LOC111392621	Olive		IPR036961:Kinesin motor domain superfamily//IPR001752:Kinesin motor domain//IPR027417:P-loop containing nucleoside triphosphate hydrolase//IPR019821:Kinesin motor domain, conserved site
LOC111382799	259.052	0.609027	1.52523	0.183794	3.31364	0.000920897	0.00217399		uncharacterized_LOC111382799,_transcript_variant_X6	Olive
LOC111376001	189.616	0.605052	1.52103	0.203229	2.97719	0.00290904	0.00630698	XP_022854698.1	probable_polygalacturonase	Olive	PF12708:Pectate_lyase_superfamily_protein	IPR025532:Glucose-6-phosphate 1-epimerase//IPR014718:Glycoside hydrolase-type carbohydrate-binding//IPR011013:Galactose mutarotase-like domain superfamily
LOC111401231	257.51	0.603051	1.51893	0.176698	3.41289	0.000642781	0.0015551	XP_022884645.1	uncharacterized_LOC111401231	Olive		IPR004932:Retrieval of early ER protein Rer1
LOC111384196	235.695	0.601919	1.51773	0.195412	3.08026	0.00206818	0.00460264			Olive		IPR037175:Kynurenine formamidase superfamily
LOC111378852	193.276	0.601538	1.51733	0.241561	2.49021	0.0127667	0.0245375		alcohol_dehydrogenase_2-like	Olive
LOC111369791	183.646	0.599615	1.51531	0.206293	2.90661	0.00365364	0.0077858	XP_022847209.1	cytochrome_b5	Olive	PF00173:Cytochrome_b5-like_Heme/Steroid_binding_domain	IPR036291:NAD(P)-binding domain superfamily
LOC111371473	352.151	0.597608	1.51321	0.175244	3.41014	0.000649292	0.00156994	XP_022849258.1	vesicle-associated_protein_2-2,_transcript_variant_X4	Olive	PF00635:MSP_(Major_sperm_protein)_domain	IPR002048:EF-hand domain//IPR018247:EF-Hand 1, calcium-binding site//IPR011992:EF-hand domain pair
LOC111410430	778.136	0.596273	1.51181	0.145147	4.10807	3.99e-05	0.000114927	XP_022896518.1	uncharacterized_LOC111410430,_transcript_variant_X2	Olive	PF14365:Neprosin_activation_peptide//PF03080:Neprosin
LOC111409156	264.88	0.59552	1.51102	0.198601	2.99857	0.00271248	0.00591498	XP_022894895.1	filament-like_plant_protein_3,_transcript_variant_X3	Olive	PF09730:Microtubule-associated_protein_Bicaudal-D//PF05911:Filament-like_plant_protein,_long_coiled-coil
LOC111369657	152.589	0.592447	1.5078	0.231706	2.55689	0.0105611	0.0206356		uncharacterized_LOC111369657	Olive
LOC111392757	204.301	0.591642	1.50696	0.217278	2.72297	0.00646982	0.0131951	XP_022873921.1	exo-poly-alpha-D-galacturonosidase	Olive	PF00295:Glycosyl_hydrolases_family_28	IPR029058:Alpha/Beta hydrolase fold
LOC111409352	388.075	0.591196	1.5065	0.195235	3.02813	0.00246073	0.00540576	XP_022895178.1	monosaccharide-sensing_protein_2-like,_transcript_variant_X2	Olive	PF00083:Sugar_(and_other)_transporter
LOC111374986	318.737	0.589158	1.50437	0.189173	3.11438	0.00184329	0.00413609	XP_022853528.1	haloacid_dehalogenase-like_hydrolase_domain-containing_protein_3,_transcript_variant_X5	Olive	PF00702:haloacid_dehalogenase-like_hydrolase	IPR036779:LysM domain superfamily//IPR018392:LysM domain
LOC111400008	263.722	0.58835	1.50353	0.186261	3.15875	0.00158448	0.00359372		uncharacterized_protein_LOC111400008	Olive		IPR001680:WD40 repeat//IPR020472:G-protein beta WD-40 repeat//IPR019775:WD40 repeat, conserved site//IPR017986:WD40-repeat-containing domain//IPR036322:WD40-repeat-containing domain superfamily//IPR015943:WD40/YVTN repeat-like-containing domain superfamily
LOC111400351	110.426	0.587021	1.50214	0.264491	2.21944	0.0264568	0.0471926	XP_022883534.1	classical_arabinogalactan_protein_10-like	Olive		IPR002650:Sulphate adenylyltransferase//IPR015947:PUA-like superfamily//IPR014729:Rossmann-like alpha/beta/alpha sandwich fold
LOC111412390	304.092	0.586538	1.50164	0.192653	3.04453	0.00233042	0.00514234	XP_022899069.1	small_nuclear_ribonucleoprotein_Sm_D2	Olive	PF01423:LSM_domain
LOC111391298	387.979	0.586246	1.50134	0.155675	3.76584	0.00016599	0.000438525	XP_022872259.1	MATH_domain_and_coiled-coil_domain-containing_protein_At3g58270-like	Olive	PF00917:MATH_domain	IPR011009:Protein kinase-like domain superfamily
LOC111373782	128.264	0.585731	1.5008	0.240276	2.43774	0.0147794	0.0279856	XP_022852112.1	light-induced_protein,_chloroplastic-like	Olive	PF04755:PAP_fibrillin	IPR009071:High mobility group box domain//IPR036910:High mobility group box domain superfamily
LOC111376716	304.312	0.58227	1.4972	0.200235	2.90793	0.00363826	0.00775402	XP_022855463.1	mechanosensitive_ion_channel_protein_6-like	Olive	PF00924:Mechanosensitive_ion_channel	IPR007527:Zinc finger, SWIM-type
LOC111407419	554.457	0.581999	1.49692	0.139577	4.16972	3.05e-05	8.9e-05	XP_022892644.1	cellulose_synthase-like_protein_D3,_transcript_variant_X4	Olive	PF14570:RING/Ubox_like_zinc-binding_domain//PF03552:Cellulose_synthase
LOC111375011	412.854	0.580776	1.49565	0.17051	3.40611	0.000658963	0.00159115	XP_022853573.1	uncharacterized_LOC111375011	Olive	PF15243:Anaphase-promoting_complex_subunit_15
LOC111397634	223.691	0.580329	1.49519	0.192737	3.01099	0.00260396	0.00569697	XP_022880405.1	protein_RDM1-like	Olive	PF09187:RNA-directed_DNA_methylation_1
LOC111403511	3475.18	0.577082	1.49183	0.130885	4.40909	1.04e-05	3.22e-05	XP_022887820.1	uncharacterized_LOC111403511,_transcript_variant_X2	Olive	PF12697:Alpha/beta_hydrolase_family	IPR020683:Ankyrin repeat-containing domain//IPR036770:Ankyrin repeat-containing domain superfamily//IPR002110:Ankyrin repeat
LOC111372259	3237.43	0.572769	1.48738	0.1169	4.89966	9.6e-07	3.37e-06	XP_022850270.1	patellin-3-like	Olive	PF00650:CRAL/TRIO_domain//PF03765:CRAL/TRIO,_N-terminal_domain	IPR000095:CRIB domain//IPR036936:CRIB domain superfamily
LOC111390197	168.277	0.568713	1.4832	0.234208	2.42824	0.0151723	0.0286808	XP_022870969.1	protein_trichome_birefringence-like_24	Olive	PF14416:PMR5_N_terminal_Domain//PF13839:GDSL/SGNH-like_Acyl-Esterase_family_found_in_Pmr5_and_Cas1p
LOC111383872	252.031	0.56862	1.4831	0.219731	2.5878	0.00965912	0.0190436		ylmG_homolog_protein_2,_chloroplastic-like	Olive		IPR014743:Chloride channel, core//IPR000644:CBS domain//IPR001807:Chloride channel, voltage gated//IPR002251:Chloride channel ClC-plant
LOC111397171	339.981	0.567965	1.48243	0.216104	2.6282	0.00858381	0.0170919	XP_022879712.1	alpha-galactosidase_3-like	Olive	PF17801:Alpha_galactosidase_C-terminal_beta_sandwich_domain//PF16499:Alpha_galactosidase_A	IPR036609:LCCL domain superfamily
LOC111368124	549.175	0.567588	1.48204	0.188008	3.01895	0.00253649	0.00555783	XP_022845107.1	protein_NUCLEAR_FUSION_DEFECTIVE_2	Olive	PF14622:Ribonuclease-III-like	IPR011011:Zinc finger, FYVE/PHD-type
LOC111370079	369.971	0.564442	1.47881	0.157156	3.59161	0.000328642	0.000831206	XP_022847555.1	1-acyl-sn-glycerol-3-phosphate_acyltransferase_2-like	Olive	PF01553:Acyltransferase//PF16076:Acyltransferase_C-terminus	IPR007527:Zinc finger, SWIM-type//IPR006564:Zinc finger, PMZ-type
LOC111377653	168.393	0.56199	1.4763	0.233357	2.40828	0.0160277	0.0301318	XP_022856545.1	uncharacterized_LOC111377653	Olive		IPR027417:P-loop containing nucleoside triphosphate hydrolase//IPR003593:AAA+ ATPase domain//IPR003960:ATPase, AAA-type, conserved site
LOC111407247	1145.57	0.560835	1.47512	0.154048	3.64064	0.000271957	0.00069648	XP_022892391.1	28_kDa_heat-_and_acid-stable_phosphoprotein-like,_transcript_variant_X2	Olive	PF10252:Casein_kinase_substrate_phosphoprotein_PP28	IPR003653:Ulp1 protease family, C-terminal catalytic domain//IPR038765:Papain-like cysteine peptidase superfamily
LOC111382387	188.939	0.560471	1.47475	0.214902	2.60803	0.00910661	0.0180591	XP_022862112.1	TBC1_domain_family_member_2B-like,_transcript_variant_X4	Olive	PF00566:Rab-GTPase-TBC_domain
LOC111405135	184.369	0.557569	1.47179	0.210999	2.64252	0.00822915	0.0164451		uncharacterized_LOC111405135	Olive
LOC111385840	400.866	0.552587	1.46671	0.179124	3.08494	0.00203593	0.00453776	XP_022866039.1	vacuolar_cation/proton_exchanger_3-like,_transcript_variant_X6	Olive	PF01699:Sodium/calcium_exchanger_protein
LOC111410094	975.538	0.551745	1.46586	0.173814	3.17433	0.00150181	0.00341821	XP_022896057.1	fructose-bisphosphate_aldolase_1,_chloroplastic-like	Olive	PF00274:Fructose-bisphosphate_aldolase_class-I	IPR011990:Tetratricopeptide-like helical domain superfamily
LOC111411585	203.334	0.548637	1.4627	0.196708	2.78909	0.00528563	0.0109594	XP_022897857.1	B3_domain-containing_protein_At5g42700-like,_transcript_variant_X2	Olive	PF02362:B3_DNA_binding_domain
LOC111402322	259.906	0.546724	1.46076	0.178832	3.0572	0.00223415	0.00494484	XP_022886317.1	UDP-glucuronate_4-epimerase_3-like	Olive	PF01370:NAD_dependent_epimerase/dehydratase_family	IPR029069:HotDog domain superfamily
LOC111383389	184.539	0.54208	1.45607	0.209065	2.59288	0.00951755	0.0187931	XP_022863264.1	protein_LONGIFOLIA_2-like	Olive	PF14309:Domain_of_unknown_function_(DUF4378)//PF14383:DUF761-associated_sequence_motif
LOC111376646	363.512	0.541673	1.45566	0.170927	3.16903	0.00152947	0.00347716	XP_022855385.1	serine/threonine-protein_phosphatase_5-like,_transcript_variant_X2	Olive	PF00149:Calcineurin-like_phosphoesterase//PF00515:Tetratricopeptide_repeat//PF08321:PPP5_TPR_repeat_region
LOC111403434	428.107	0.540619	1.4546	0.166832	3.2405	0.0011932	0.00276481	XP_022887713.1	uncharacterized_LOC111403434,_transcript_variant_X2	Olive
LOC111388646	1335.6	0.539917	1.45389	0.122464	4.40878	1.04e-05	3.22e-05	XP_022869173.1	uncharacterized_LOC111388646,_transcript_variant_X2	Olive	PF05794:T-complex_protein_11
LOC111410631	269.112	0.53671	1.45066	0.187952	2.85556	0.00429605	0.00904585	XP_022896837.1	probable_LRR_receptor-like_serine/threonine-protein_kinase_At4g36180	Olive	PF13855:Leucine_rich_repeat
LOC111382985	971.513	0.535948	1.44989	0.212448	2.52272	0.011645	0.0225777	XP_022862797.1	ubiquitin-conjugating_enzyme_E2_36	Olive	PF00179:Ubiquitin-conjugating_enzyme
LOC111408961	226.765	0.535841	1.44979	0.186644	2.87092	0.00409276	0.00865247	XP_022894591.1	protein_indeterminate-domain_2-like,_transcript_variant_X2	Olive	PF00096:Zinc_finger,_C2H2_type	IPR027417:P-loop containing nucleoside triphosphate hydrolase//IPR032675:Leucine-rich repeat domain superfamily
LOC111380568	2812.19	0.532006	1.44594	0.136534	3.89652	9.76e-05	0.00026665	XP_022859940.1	lactoylglutathione_lyase_GLX1-like,_transcript_variant_X2	Olive	PF00903:Glyoxalase/Bleomycin_resistance_protein/Dioxygenase_superfamily
LOC111404354	1825.29	0.529479	1.44341	0.152096	3.48121	0.000499153	0.00122748	XP_022888938.1	serine_hydroxymethyltransferase_4-like	Olive	PF00464:Serine_hydroxymethyltransferase	IPR000595:Cyclic nucleotide-binding domain//IPR018490:Cyclic nucleotide-binding-like//IPR014710:RmlC-like jelly roll fold
LOC111405371	228.144	0.528959	1.44289	0.217296	2.43428	0.0149216	0.0282307	XP_022889970.1	probable_aspartyl_aminopeptidase	Olive	PF02127:Aminopeptidase_I_zinc_metalloprotease_(M18)	IPR001841:Zinc finger, RING-type//IPR013083:Zinc finger, RING/FYVE/PHD-type
LOC111396782	308.793	0.528426	1.44235	0.170903	3.09197	0.00198835	0.00443967	XP_022879060.1	rho_GDP-dissociation_inhibitor_1-like	Olive	PF02115:RHO_protein_GDP_dissociation_inhibitor	IPR036291:NAD(P)-binding domain superfamily
LOC111369798	310.712	0.52338	1.43732	0.177278	2.95232	0.00315398	0.0067851		uncharacterized_LOC111369798,_transcript_variant_X6	Olive		IPR006408:P-type ATPase, subfamily IIB//IPR023299:P-type ATPase, cytoplasmic domain N//IPR036412:HAD-like superfamily//IPR023214:HAD superfamily//IPR023298:P-type ATPase, transmembrane domain superfamily//IPR018303:P-type ATPase, phosphorylation site//IPR001757:P-type ATPase//IPR004014:Cation-transporting P-type ATPase, N-terminal//IPR008250:P-type ATPase, A domain superfamily
LOC111376178	316.961	0.521319	1.43527	0.170042	3.06582	0.00217075	0.00481719	XP_022854890.1	uncharacterized_LOC111376178	Olive	PF04570:zinc-finger_of_the_FCS-type,_C2-C2	IPR010089:Flavoprotein WrbA-like//IPR008254:Flavodoxin/nitric oxide synthase//IPR029039:Flavoprotein-like superfamily
LOC111367869	538.72	0.519695	1.43365	0.138291	3.75798	0.000171294	0.000451542	XP_022844711.1	patatin-like_protein_3	Olive	PF01734:Patatin-like_phospholipase	IPR035669:GDSL lipase/esterase-like, plant//IPR036514:SGNH hydrolase superfamily
LOC111373797	1939.72	0.51791	1.43188	0.145062	3.57027	0.00035662	0.000897044	XP_022852128.1	AT-hook_motif_nuclear-localized_protein_10-like,_transcript_variant_X3	Olive	PF03479:Plants_and_Prokaryotes_Conserved_(PCC)_domain	IPR003593:AAA+ ATPase domain//IPR003439:ABC transporter-like//IPR034003:ATP-binding cassette transporter, PDR-like subfamily G, domain 2//IPR034001:ATP-binding cassette transporter, PDR-like subfamily G, domain 1//IPR027417:P-loop containing nucleoside triphosphate hydrolase
LOC111385815	377.322	0.515041	1.42903	0.166062	3.1015	0.0019254	0.00430712	XP_022866004.1	oleoyl-acyl_carrier_protein_thioesterase_1,_chloroplastic-like	Olive	PF01643:Acyl-ACP_thioesterase	IPR012677:Nucleotide-binding alpha-beta plait domain superfamily//IPR000504:RNA recognition motif domain//IPR035979:RNA-binding domain superfamily
LOC111377611	4193.7	0.513843	1.42785	0.112206	4.57944	4.66e-06	1.51e-05	XP_022856508.1	7-deoxyloganetic_acid_glucosyltransferase-like,_transcript_variant_X2	Olive	PF00201:UDP-glucoronosyl_and_UDP-glucosyl_transferase	IPR029044:Nucleotide-diphospho-sugar transferases
LOC111412276	4552.04	0.513025	1.42704	0.124266	4.12845	3.65e-05	0.000105748	XP_022898901.1	secoisolariciresinol_dehydrogenase-like,_transcript_variant_X3	Olive	PF13561:Enoyl-(Acyl_carrier_protein)_reductase	IPR036291:NAD(P)-binding domain superfamily
LOC111372260	1502.02	0.512188	1.42621	0.108021	4.74154	2.12e-06	7.19e-06	XP_022850271.1	patellin-3	Olive	PF00650:CRAL/TRIO_domain//PF03765:CRAL/TRIO,_N-terminal_domain
LOC111406046	809.595	0.512118	1.42614	0.136093	3.76301	0.000167882	0.00044314	XP_022890997.1	phosphoglucan_phosphatase_LSF2,_chloroplastic,_transcript_variant_X4	Olive	PF00782:Dual_specificity_phosphatase,_catalytic_domain
LOC111412716	310.111	0.508	1.42208	0.190279	2.66977	0.00759039	0.0152721	XP_022899427.1	ACT_domain-containing_protein_ACR11-like	Olive		IPR036388:Winged helix-like DNA-binding domain superfamily//IPR000717:Proteasome component (PCI) domain
LOC111410301	534.166	0.507056	1.42115	0.137166	3.69665	0.000218467	0.000567532			Olive
LOC111401133	271.24	0.505881	1.41999	0.196418	2.57554	0.0100084	0.0196746	XP_022884484.1	pentatricopeptide_repeat-containing_protein_At1g03100,_mitochondrial,_transcript_variant_X7	Olive	PF01535:PPR_repeat//PF13041:PPR_repeat_family//PF13812:Pentatricopeptide_repeat_domain	IPR012946:X8 domain
LOC111381377	754.435	0.503655	1.4178	0.167226	3.01183	0.0025968	0.00568316	XP_022860923.1	chorismate_synthase_1,_chloroplastic-like	Olive	PF01264:Chorismate_synthase	IPR001164:Arf GTPase activating protein//IPR037278:ARFGAP/RecO-like zinc finger//IPR038508:ArfGAP domain superfamily
LOC111411518	238.165	0.502795	1.41696	0.201448	2.49591	0.0125636	0.024183	XP_022897810.1	2-hydroxyisoflavanone_dehydratase-like	Olive	PF07859:alpha/beta_hydrolase_fold
LOC111375392	181.22	0.50002	1.41423	0.218036	2.29329	0.0218315	0.0398316		uncharacterized_LOC111375392,_transcript_variant_X3	Olive
LOC111412346	274.859	0.499878	1.41409	0.185782	2.69067	0.00713097	0.0144254	XP_022899007.1	uncharacterized_LOC111412346,_transcript_variant_X4	Olive
LOC111391378	1477.69	0.498574	1.41282	0.18442	2.70348	0.00686182	0.0139261	XP_022872365.1	(+)-neomenthol_dehydrogenase-like,_transcript_variant_X5	Olive	PF00106:short_chain_dehydrogenase
LOC111402418	217.954	0.496925	1.4112	0.192742	2.57819	0.00993193	0.0195368	XP_022886478.1	26S_proteasome_regulatory_subunit_6A-like	Olive	PF00004:ATPase_family_associated_with_various_cellular_activities_(AAA)	IPR008942:ENTH/VHS//IPR013809:ENTH domain
LOC111383677	683.119	0.494554	1.40888	0.126594	3.90662	9.36e-05	0.000256391	XP_022863576.1	40S_ribosomal_protein_S10-1-like	Olive	PF03501:Plectin/S10_domain
LOC111401132	447.723	0.494301	1.40864	0.147362	3.35434	0.000795548	0.001899	XP_022884483.1	endo-1,4-beta-xylanase_C,_transcript_variant_X2	Olive	PF00331:Glycosyl_hydrolase_family_10//PF02018:Carbohydrate_binding_domain	IPR036079:V-type ATP synthase subunit C-like//IPR035067:V-type ATPase subunit c//IPR016727:ATPase, V0 complex, subunit d
LOC111367929	165.194	0.492901	1.40727	0.223757	2.20284	0.0276058	0.0490573	XP_022844813.1	UPF0603_protein_At1g54780,_chloroplastic-like	Olive	PF04536:TPM_domain
LOC111373144	1879.08	0.49184	1.40624	0.147932	3.32476	0.000884931	0.00209644	XP_022851394.1	heterogeneous_nuclear_ribonucleoprotein_Q-like,_transcript_variant_X3	Olive	PF00076:RNA_recognition_motif._(a.k.a._RRM,_RBD,_or_RNP_domain)	IPR002048:EF-hand domain//IPR035595:UDP-glycosyltransferase family, conserved site//IPR002999:Tudor domain
LOC111406057	708.48	0.489571	1.40403	0.151135	3.2393	0.00119825	0.00277518	XP_022891015.1	2-haloacrylate_reductase-like	Olive	PF08240:Alcohol_dehydrogenase_GroES-like_domain//PF00107:Zinc-binding_dehydrogenase
LOC111398964	598.518	0.487113	1.40164	0.156539	3.11177	0.00185969	0.00417067	XP_022881912.1	B3_domain-containing_protein_At4g01580-like,_transcript_variant_X9	Olive	PF02362:B3_DNA_binding_domain	IPR022712:Beta-Casp domain//IPR036866:Ribonuclease Z/Hydroxyacylglutathione hydrolase-like
LOC111377432	693.19	0.484869	1.39946	0.126799	3.82391	0.00013135	0.000351901	XP_022856293.1	probable_acyl-CoA_dehydrogenase_IBR3,_transcript_variant_X2	Olive	PF00441:Acyl-CoA_dehydrogenase,_C-terminal_domain//PF02771:Acyl-CoA_dehydrogenase,_N-terminal_domain//PF01636:Phosphotransferase_enzyme_family//PF02770:Acyl-CoA_dehydrogenase,_middle_domain
LOC111406205	384.495	0.484595	1.39919	0.153506	3.15686	0.00159481	0.00361494	XP_022891249.1	protein_mago_nashi_homolog_2-like	Olive	PF02792:Mago_nashi_protein
LOC111389125	350.709	0.48435	1.39896	0.155691	3.11097	0.00186474	0.00418115	XP_022869762.1	SEC14_cytosolic_factor-like,_transcript_variant_X2	Olive	PF00650:CRAL/TRIO_domain	IPR004416:tRNA uridine 5-carboxymethylaminomethyl modification enzyme MnmG//IPR020595:MnmG-related, conserved site//IPR036188:FAD/NAD(P)-binding domain superfamily
LOC111375946	15070.8	0.483519	1.39815	0.169431	2.85378	0.00432022	0.00909163	XP_022854636.1	metallothionein-like_protein_type_2	Olive	PF01439:Metallothionein
LOC111392274	487.969	0.480057	1.3948	0.164932	2.91064	0.00360692	0.00769454		F-box/kelch-repeat_protein_At5g42350-like	Olive		IPR002579:Peptide methionine sulphoxide reductase MrsB//IPR011057:Mss4-like superfamily
LOC111372921	275.285	0.478365	1.39316	0.194672	2.45729	0.0139991	0.0266851	XP_022851117.1	copper-transporting_ATPase_PAA2,_chloroplastic-like	Olive	PF00403:Heavy-metal-associated_domain
LOC111407962	477.786	0.477627	1.39245	0.15721	3.03814	0.00238047	0.00524245	XP_022893458.1	3-hydroxyisobutyryl-CoA_hydrolase-like_protein_3,_mitochondrial,_transcript_variant_X4	Olive	PF16113:Enoyl-CoA_hydratase/isomerase	IPR029058:Alpha/Beta hydrolase fold//IPR002168:Lipase, GDXG, putative histidine active site
LOC111381913	1923.33	0.475331	1.39024	0.131895	3.60387	0.000313517	0.000796305	XP_022861533.1	RNA-binding_protein_24-like,_transcript_variant_X4	Olive	PF00076:RNA_recognition_motif._(a.k.a._RRM,_RBD,_or_RNP_domain)	IPR011016:Zinc finger, RING-CH-type//IPR013083:Zinc finger, RING/FYVE/PHD-type
LOC111367603	1123.05	0.473376	1.38835	0.11227	4.2164	2.48e-05	7.34e-05	XP_022844335.1	protein_BASIC_PENTACYSTEINE6-like,_transcript_variant_X8	Olive	PF06217:GAGA_binding_protein-like_family
LOC111402481	203.203	0.472953	1.38795	0.205159	2.3053	0.0211496	0.0387113	XP_022886594.1	two-pore_potassium_channel_1-like,_transcript_variant_X3	Olive	PF07885:Ion_channel
LOC111370518	2165.35	0.472747	1.38775	0.144221	3.27794	0.00104569	0.00244422	XP_022848004.1	pyruvate_decarboxylase_1	Olive	PF00205:Thiamine_pyrophosphate_enzyme,_central_domain//PF02775:Thiamine_pyrophosphate_enzyme,_C-terminal_TPP_binding_domain//PF02776:Thiamine_pyrophosphate_enzyme,_N-terminal_TPP_binding_domain	IPR020084:NUDIX hydrolase, conserved site//IPR015797:NUDIX hydrolase-like domain superfamily//IPR000086:NUDIX hydrolase domain
LOC111374745	839.075	0.471727	1.38677	0.119221	3.95674	7.6e-05	0.000210967	XP_022853250.1	uncharacterized_LOC111374745	Olive		IPR001104:3-oxo-5-alpha-steroid 4-dehydrogenase, C-terminal
LOC111387403	477.07	0.469252	1.38439	0.149123	3.14675	0.00165096	0.00373141	XP_022867725.1	transcription_factor_TCP8-like	Olive	PF03634:TCP_family_transcription_factor	IPR012349:FMN-binding split barrel
LOC111408364	483.117	0.466753	1.382	0.141132	3.3072	0.000942325	0.00222068	XP_022893898.1	probable_glycosyltransferase_At5g25310	Olive	PF03016:Exostosin_family	IPR001680:WD40 repeat//IPR036322:WD40-repeat-containing domain superfamily//IPR020472:G-protein beta WD-40 repeat//IPR019775:WD40 repeat, conserved site//IPR017986:WD40-repeat-containing domain//IPR015943:WD40/YVTN repeat-like-containing domain superfamily
LOC111367177	266.571	0.464045	1.3794	0.176286	2.63234	0.00847997	0.0169021	XP_022843689.1	zinc_finger_RNA-binding_protein-like	Olive	PF12874:Zinc-finger_of_C2H2_type	IPR038538:MTERF superfamily, mitochondrial/chloroplastic//IPR003690:Transcription termination factor, mitochondrial/chloroplastic
LOC111412345	280.627	0.461274	1.37676	0.187026	2.46636	0.0136494	0.0260745	XP_022899003.1	ADP-ribosylation_factor_GTPase-activating_protein_AGD12-like,_transcript_variant_X6	Olive	PF00168:C2_domain
LOC111372465	287.957	0.459463	1.37503	0.172339	2.66604	0.00767511	0.0154296	XP_022850583.1	uncharacterized_LOC111372465,_transcript_variant_X2	Olive	PF04765:Protein_of_unknown_function_(DUF616)
LOC111401998	422.071	0.459101	1.37468	0.168456	2.72535	0.00642324	0.0131093	XP_022885780.1	uncharacterized_LOC111401998	Olive	PF09835:Uncharacterized_protein_conserved_in_bacteria_(DUF2062)
LOC111392164	545.657	0.458079	1.37371	0.133946	3.41987	0.000626499	0.00151778	XP_022873198.1	rac-like_GTP-binding_protein_5	Olive	PF00071:Ras_family
LOC111401721	249.301	0.456199	1.37192	0.185064	2.46509	0.013698	0.0261614	XP_022885356.1	CBBY-like_protein,_transcript_variant_X2	Olive	PF13419:Haloacid_dehalogenase-like_hydrolase
LOC111404254	501.991	0.45575	1.3715	0.140577	3.24199	0.00118698	0.00275172	XP_022888826.1	50S_ribosomal_protein_L13-like,_transcript_variant_X2	Olive	PF00572:Ribosomal_protein_L13	IPR017853:Glycoside hydrolase superfamily//IPR000490:Glycoside hydrolase family 17
LOC111377876	243.361	0.453068	1.36895	0.179486	2.52425	0.0115945	0.0224824	XP_022856785.1	probable_amino-acid_acetyltransferase_NAGS1,_chloroplastic	Olive	PF00696:Amino_acid_kinase_family//PF00583:Acetyltransferase_(GNAT)_family	IPR009033:Calreticulin/calnexin, P domain superfamily//IPR001580:Calreticulin/calnexin//IPR018124:Calreticulin/calnexin, conserved site//IPR013320:Concanavalin A-like lectin/glucanase domain superfamily
LOC111410302	254.864	0.446965	1.36317	0.183146	2.44048	0.0146676	0.0278111	XP_022896337.1	peptidyl-prolyl_cis-trans_isomerase_CYP22	Olive	PF00160:Cyclophilin_type_peptidyl-prolyl_cis-trans_isomerase/CLD
LOC111392247	2082.45	0.446145	1.36239	0.109052	4.09113	4.29e-05	0.0001231	XP_022873302.1	U-box_domain-containing_protein_15-like	Olive	PF04564:U-box_domain//PF00514:Armadillo/beta-catenin-like_repeat
LOC111410520	197.985	0.445791	1.36206	0.194569	2.29117	0.0219534	0.04003	XP_022896671.1	heavy_metal-associated_isoprenylated_plant_protein_26-like	Olive	PF00403:Heavy-metal-associated_domain	IPR011990:Tetratricopeptide-like helical domain superfamily//IPR002885:Pentatricopeptide repeat
LOC111377553	519.776	0.443547	1.35994	0.142792	3.10623	0.00189488	0.0042442	XP_022856450.1	dynamin-related_protein_1E-like	Olive	PF02212:Dynamin_GTPase_effector_domain	IPR011598:Myc-type, basic helix-loop-helix (bHLH) domain//IPR036638:Helix-loop-helix DNA-binding domain superfamily
LOC111377478	10299.4	0.443	1.35943	0.13263	3.34012	0.000837433	0.00199135	XP_022856353.1	perakine_reductase-like	Olive	PF00248:Aldo/keto_reductase_family	IPR008972:Cupredoxin//IPR003245:Phytocyanin domain
LOC111369709	618.152	0.441371	1.35789	0.128837	3.42581	0.000612961	0.00148777	XP_022847098.1	uncharacterized_LOC111369709,_transcript_variant_X4	Olive		IPR000554:Ribosomal protein S7e
LOC111402406	371.863	0.438522	1.35522	0.169943	2.58041	0.0098682	0.0194205	XP_022886458.1	U-box_domain-containing_protein_4-like,_transcript_variant_X2	Olive	PF00514:Armadillo/beta-catenin-like_repeat	IPR014816:tRNA (1-methyladenosine) methyltransferase catalytic subunit Gcd14//IPR029063:S-adenosyl-L-methionine-dependent methyltransferase
LOC111393874	236.529	0.438137	1.35485	0.189264	2.31496	0.0206153	0.0378116	XP_022875408.1	COP9_signalosome_complex_subunit_4	Olive	PF01399:PCI_domain
LOC111401601	346.979	0.437706	1.35445	0.174012	2.51538	0.0118903	0.0230109			Olive
LOC111368484	308.524	0.437665	1.35441	0.179258	2.44153	0.0146251	0.0277431	XP_022845506.1	probable_glutathione_peroxidase_8	Olive	PF00255:Glutathione_peroxidase
LOC111370415	537.82	0.437066	1.35385	0.192759	2.26742	0.0233643	0.0422637	XP_022847873.1	callose_synthase_12-like	Olive	PF14288:1,3-beta-glucan_synthase_subunit_FKS1,_domain-1//PF02364:1,3-beta-glucan_synthase_component
LOC111380373	237.426	0.434932	1.35185	0.183957	2.36431	0.0180635	0.0335465	XP_022859680.1	protein_XRI1-like,_transcript_variant_X2	Olive		IPR013026:Tetratricopeptide repeat-containing domain//IPR019734:Tetratricopeptide repeat//IPR011990:Tetratricopeptide-like helical domain superfamily
LOC111367642	650.671	0.430611	1.3478	0.150074	2.86932	0.00411354	0.00869367	XP_022844398.1	5'-nucleotidase_SurE-like	Olive	PF01975:Survival_protein_SurE
LOC111412277	2715.16	0.430609	1.3478	0.133988	3.21378	0.00130998	0.00301587	XP_022898903.1	secoisolariciresinol_dehydrogenase-like	Olive	PF13561:Enoyl-(Acyl_carrier_protein)_reductase	IPR006121:Heavy metal-associated domain, HMA//IPR036163:Heavy metal-associated domain superfamily
LOC111378740	1475.5	0.428848	1.34616	0.122297	3.50661	0.000453856	0.00112257		aquaporin_PIP2-7-like	Olive
LOC111383736	821.441	0.428692	1.34601	0.15136	2.83226	0.00462195	0.00967816	XP_022863645.1	probable_lysine-specific_demethylase_ELF6	Olive	PF02373:JmjC_domain,_hydroxylase//PF02375:jmjN_domain
LOC111381878	617.877	0.426687	1.34414	0.160059	2.66581	0.00768027	0.015439	XP_022861493.1	uncharacterized_protein_PB18E9.04c-like,_transcript_variant_X2	Olive		IPR017930:Myb domain//IPR009057:Homeobox-like domain superfamily//IPR006447:Myb domain, plants
LOC111388752	849.111	0.424134	1.34177	0.143533	2.95495	0.0031272	0.00673524	XP_022869315.1	cinnamyl_alcohol_dehydrogenase_1-like	Olive	PF08240:Alcohol_dehydrogenase_GroES-like_domain//PF00107:Zinc-binding_dehydrogenase
LOC111376529	369.123	0.416804	1.33497	0.156288	2.6669	0.00765548	0.015392	XP_022855257.1	sialidase-like	Olive		IPR013766:Thioredoxin domain//IPR036249:Thioredoxin-like superfamily//IPR037944:Peroxiredoxin-5-like
LOC111382492	268.728	0.413292	1.33172	0.176539	2.34108	0.0192281	0.0355113	XP_022862256.1	acyl-protein_thioesterase_2-like,_transcript_variant_X4	Olive	PF02230:Phospholipase/Carboxylesterase	IPR023213:Chloramphenicol acetyltransferase-like domain superfamily
LOC111365917	515.648	0.410516	1.32916	0.138687	2.96002	0.00307618	0.00663514	XP_022842243.1	transcription_factor_bHLH48-like,_transcript_variant_X2	Olive	PF00010:Helix-loop-helix_DNA-binding_domain	IPR037523:Vicinal oxygen chelate (VOC) domain//IPR029068:Glyoxalase/Bleomycin resistance protein/Dihydroxybiphenyl dioxygenase
LOC111410471	299.824	0.408899	1.32767	0.165051	2.47742	0.0132336	0.0253351	XP_022896595.1	serine/threonine-protein_kinase-like_protein_At3g51990	Olive	PF00069:Protein_kinase_domain	IPR018316:Tubulin/FtsZ, 2-layer sandwich domain//IPR037103:Tubulin/FtsZ, C-terminal domain superfamily//IPR036525:Tubulin/FtsZ, GTPase domain superfamily//IPR008280:Tubulin/FtsZ, C-terminal//IPR013838:Beta tubulin, autoregulation binding site//IPR023123:Tubulin, C-terminal//IPR002453:Beta tubulin//IPR000217:Tubulin//IPR003008:Tubulin/FtsZ, GTPase domain//IPR017975:Tubulin, conserved site
LOC111367606	285.149	0.40864	1.32743	0.178747	2.28614	0.0222459	0.0404829		uncharacterized_LOC111367606	Olive
LOC111397761	4781.21	0.408539	1.32734	0.123966	3.29558	0.000982196	0.00230753	XP_022880514.1	serine_hydroxymethyltransferase_4-like	Olive	PF00464:Serine_hydroxymethyltransferase	IPR036163:Heavy metal-associated domain superfamily
LOC111394032	436.675	0.403196	1.32243	0.161163	2.50179	0.0123565	0.0238254			Olive		IPR011992:EF-hand domain pair//IPR002048:EF-hand domain//IPR027359:Voltage-dependent channel domain superfamily
LOC111411726	949.973	0.393316	1.31341	0.129755	3.03122	0.00243568	0.00535528	XP_022898071.1	cytochrome_P450_704C1-like	Olive	PF00067:Cytochrome_P450	IPR036504:CGI121/TPRKB superfamily
LOC111380877	607.493	0.392298	1.31248	0.130647	3.00274	0.00267557	0.00584186	XP_022860610.1	chorismate_synthase_1,_chloroplastic-like,_transcript_variant_X5	Olive	PF01264:Chorismate_synthase	IPR013087:Zinc finger C2H2-type
LOC111375924	440.848	0.390592	1.31093	0.142966	2.73206	0.0062939	0.0128659	XP_022854616.1	glucose-6-phosphate_1-dehydrogenase,_chloroplastic	Olive	PF02781:Glucose-6-phosphate_dehydrogenase,_C-terminal_domain
LOC111399506	1177.1	0.384291	1.30522	0.1437	2.67426	0.00748944	0.0150843	XP_022882630.1	tetraspanin-2	Olive	PF00335:Tetraspanin_family	IPR001289:Nuclear transcription factor Y subunit A//IPR018362:CCAAT-binding factor, conserved site
LOC111373591	495.905	0.382311	1.30343	0.13967	2.73725	0.00619553	0.0126849	XP_022851913.1	phosphatidylinositol/phosphatidylcholine_transfer_protein_SFH9-like,_transcript_variant_X8	Olive	PF00650:CRAL/TRIO_domain//PF03765:CRAL/TRIO,_N-terminal_domain	IPR000535:Major sperm protein (MSP) domain//IPR008962:PapD-like superfamily//IPR016763:Vesicle-associated membrane-protein-associated protein//IPR013783:Immunoglobulin-like fold
LOC111380799	1266.34	0.381615	1.3028	0.110313	3.45938	0.000541429	0.00132418	XP_022860213.1	glutathione_S-transferase_F11-like	Olive	PF00043:Glutathione_S-transferase,_C-terminal_domain//PF02798:Glutathione_S-transferase,_N-terminal_domain	IPR008928:Six-hairpin glycosidase superfamily
LOC111407229	544.467	0.37868	1.30015	0.149022	2.5411	0.0110505	0.0215181	XP_022892362.1	eukaryotic_translation_initiation_factor_4E-1-like	Olive	PF01652:Eukaryotic_initiation_factor_4E	IPR032675:Leucine-rich repeat domain superfamily
LOC111382512	2193.8	0.375012	1.29685	0.159639	2.34912	0.0188176	0.0348106	XP_022862283.1	uncharacterized_protein_At2g38710-like	Olive	PF01871:AMMECR1	IPR029058:Alpha/Beta hydrolase fold
LOC111396599	686.708	0.372697	1.29477	0.131388	2.83662	0.00455942	0.00955913	XP_022878784.1	uncharacterized_LOC111396599,_transcript_variant_X7	Olive	PF05003:Protein_of_unknown_function_(DUF668)//PF11961:Domain_of_unknown_function_(DUF3475)
LOC111405401	588.953	0.36989	1.29225	0.155904	2.37255	0.0176657	0.0328858	XP_022890029.1	flocculation_protein_FLO11-like,_transcript_variant_X3	Olive
LOC111402311	482.84	0.365178	1.28804	0.147158	2.48154	0.0130817	0.0250856	XP_022886298.1	DAG_protein,_chloroplastic-like,_transcript_variant_X2	Olive		IPR002068:Alpha crystallin/Hsp20 domain//IPR008978:HSP20-like chaperone
LOC111402073	747.416	0.353689	1.27782	0.129429	2.73269	0.00628188	0.0128449	XP_022885888.1	glucan_endo-1,3-beta-glucosidase_13-like	Olive	PF07983:X8_domain//PF00332:Glycosyl_hydrolases_family_17	IPR018333:Squalene cyclase//IPR008930:Terpenoid cyclases/protein prenyltransferase alpha-alpha toroid//IPR002365:Terpene synthase, conserved site
LOC111389691	434.566	0.352654	1.27691	0.156445	2.25418	0.024185	0.0436191	XP_022870402.1	ran-binding_protein_1_homolog_c-like	Olive	PF00638:RanBP1_domain	IPR006514:IRX15/IRX15L/IGXM
LOC111371820	594.49	0.351779	1.27613	0.135099	2.60386	0.00921807	0.0182532	XP_022849763.1	pyruvate_kinase_isozyme_A,_chloroplastic-like	Olive	PF00224:Pyruvate_kinase,_barrel_domain	IPR036047:F-box-like domain superfamily
LOC111375132	496.024	0.349131	1.27379	0.157804	2.21244	0.0269366	0.0479618	XP_022853698.1	golgin_subfamily_A_member_4-like	Olive	PF10358:N-terminal_C2_in_EEIG1_and_EHBP1_proteins
LOC111394540	552.836	0.343686	1.26899	0.139254	2.46805	0.0135853	0.0259579			Olive		IPR001179:FKBP-type peptidyl-prolyl cis-trans isomerase domain
LOC111409043	579.39	0.337881	1.2639	0.149252	2.26383	0.0235846	0.0426209	XP_022894710.1	nucleolar_GTP-binding_protein_1	Olive	PF06858:Nucleolar_GTP-binding_protein_1_(NOG1)//PF02421:Ferrous_iron_transport_protein_B//PF17835:NOG1_N-terminal_helical_domain	IPR029058:Alpha/Beta hydrolase fold//IPR001563:Peptidase S10, serine carboxypeptidase//IPR018202:Serine carboxypeptidase, serine active site//IPR033124:Serine carboxypeptidases, histidine active site
LOC111372397	564.685	0.33729	1.26338	0.147423	2.28791	0.0221426	0.0403335	XP_022850510.1	isoaspartyl_peptidase/L-asparaginase_1	Olive	PF01112:Asparaginase	IPR003656:Zinc finger, BED-type//IPR037220:Zinc finger BED domain//IPR012337:Ribonuclease H-like superfamily
LOC111387895	2292.76	0.335905	1.26217	0.125376	2.67918	0.00738032	0.0148814	XP_022868270.1	extensin-like	Olive	PF00168:C2_domain	IPR036396:Cytochrome P450 superfamily//IPR001128:Cytochrome P450//IPR017972:Cytochrome P450, conserved site//IPR002403:Cytochrome P450, E-class, group IV
LOC111376000	791.977	0.335116	1.26148	0.152532	2.19702	0.028019	0.0497128	XP_022854697.1	probable_polygalacturonase	Olive	PF00295:Glycosyl_hydrolases_family_28	IPR012340:Nucleic acid-binding, OB-fold//IPR005680:Ribosomal protein S23, eukaryotic/archaeal//IPR006032:Ribosomal protein S12/S23
LOC111395954	1853.49	0.333963	1.26047	0.111845	2.98593	0.00282713	0.00614604	XP_022877956.1	uncharacterized_LOC111395954	Olive	PF04520:Senescence_regulator	IPR008972:Cupredoxin//IPR034267:Ascorbate oxidase, third cupredoxin domain//IPR002355:Multicopper oxidase, copper-binding site//IPR034259:Ascorbate oxidase, first cupredoxin domain//IPR033138:Multicopper oxidases, conserved site
LOC111368757	1792.19	0.332054	1.2588	0.139524	2.37991	0.0173169	0.0323188	XP_022845952.1	RGG_repeats_nuclear_RNA_binding_protein_A-like	Olive	PF09598:Stm1//PF04774:Hyaluronan_/_mRNA_binding_family	IPR027417:P-loop containing nucleoside triphosphate hydrolase//IPR003439:ABC transporter-like//IPR017871:ABC transporter, conserved site
LOC111409252	1197.65	0.329363	1.25646	0.126371	2.60632	0.00915215	0.0181366	XP_022895037.1	transmembrane_9_superfamily_member_1-like,_transcript_variant_X2	Olive	PF02990:Endomembrane_protein_70
LOC111402163	618.404	0.32746	1.2548	0.142514	2.29774	0.0215764	0.0394325	XP_022886072.1	phosphoserine_phosphatase,_chloroplastic-like,_transcript_variant_X9	Olive	PF00702:haloacid_dehalogenase-like_hydrolase
LOC111403298	1299.67	0.326193	1.2537	0.125076	2.60796	0.00910832	0.0180604	XP_022887512.1	uncharacterized_LOC111403298,_transcript_variant_X3	Olive	PF03168:Late_embryogenesis_abundant_protein
LOC111379444	1685.07	0.321841	1.24992	0.127795	2.51841	0.0117885	0.0228283	XP_022858586.1	probable_voltage-gated_potassium_channel_subunit_beta	Olive	PF00248:Aldo/keto_reductase_family	IPR026635:Protein-lysine N-methyltransferase Efm4/METTL10//IPR029063:S-adenosyl-L-methionine-dependent methyltransferase
LOC111366180	656.74	0.320535	1.24879	0.135482	2.36588	0.0179874	0.0334237	XP_022842645.1	caffeoylshikimate_esterase-like	Olive	PF12146:Serine_aminopeptidase,_S33
LOC111365364	568.153	0.306874	1.23702	0.13422	2.28636	0.0222334	0.0404682		uncharacterized_LOC111365364,_transcript_variant_X2	Olive
LOC111368621	5536.71	0.296464	1.22813	0.0999458	2.96625	0.00301455	0.00651557	XP_022845741.1	subtilisin-like_protease_SBT1.8	Olive	PF02225:PA_domain//PF05922:Peptidase_inhibitor_I9//PF00082:Subtilase_family//PF17766:Fibronectin_type-III_domain
LOC111393170	1137.17	0.286243	1.21946	0.116896	2.44869	0.0143378	0.0272581	XP_022874336.1	uncharacterized_LOC111393170,_transcript_variant_X2	Olive		IPR029058:Alpha/Beta hydrolase fold//IPR038554:Dipeptidylpeptidase IV, N-terminal domain superfamily
LOC111371974	1034.97	0.285213	1.21859	0.116588	2.44632	0.0144322	0.0274191	XP_022849884.1	agamous-like_MADS-box_protein_AGL81	Olive	PF00319:SRF-type_transcription_factor_(DNA-binding_and_dimerisation_domain)	IPR001494:Importin-beta, N-terminal domain//IPR011989:Armadillo-like helical//IPR016024:Armadillo-type fold
LOC111385164	28044.9	0.277273	1.2119	0.109689	2.52782	0.0114773	0.0222769	XP_022865307.1	isoflavone_reductase-like_protein	Olive	PF05368:NmrA-like_family
LOC111388781	847.627	0.276853	1.21155	0.11901	2.3263	0.0200026	0.0368184	XP_022869352.1	serine/threonine-protein_kinase_Nek5,_transcript_variant_X2	Olive	PF00069:Protein_kinase_domain	IPR008949:Isoprenoid synthase domain superfamily//IPR034741:Terpene cyclase-like 1, C-terminal domain//IPR036965:Terpene synthase, N-terminal domain superfamily//IPR008930:Terpenoid cyclases/protein prenyltransferase alpha-alpha toroid
LOC111385098	1898.67	0.259799	1.19731	0.106622	2.43663	0.014825	0.0280653	XP_022865232.1	probable_S-adenosylmethionine-dependent_methyltransferase_At5g37990	Olive	PF03492:SAM_dependent_carboxyl_methyltransferase
LOC111380693	1651.38	0.249419	1.18873	0.107225	2.32614	0.0200113	0.0368263	XP_022860094.1	transcription_factor_TCP13-like,_transcript_variant_X2	Olive	PF03634:TCP_family_transcription_factor
LOC111383668	1820.01	0.238548	1.1798	0.107092	2.22751	0.0259131	0.0463481	XP_022863567.1	serine/threonine_protein_phosphatase_2A_57_kDa_regulatory_subunit_B'_kappa_isoform-like	Olive	PF01603:Protein_phosphatase_2A_regulatory_B_subunit_(B56_family)

## Sheet: Table S7
Supplementary Table S7. Genes down-regulated during early fruit development in both the first and second comparisons (P14 vs. P0 and P28 vs. P14)
Genes	baseMean	log2FoldChange	FoldChange	lfcSE	stat	pvalue	padj	Gene_ID	description	Organism	pfam	Interpro
LOC111392923	50769.8	-10.2134	-1187.27	0.221828	-46.0421	0	0	XP_022874104.1	trans-resveratrol_di-O-methyltransferase-like	Olive	PF00891:O-methyltransferase_domain//PF08100:Dimerisation_domain
LOC111389258	15571.5	-8.73086	-424.863	0.228098	-38.2768	0	0	XP_022869931.1	exopolygalacturonase-like	Olive	PF00295:Glycosyl_hydrolases_family_28	IPR010399:Tify domain
LOC111371230	12530.2	-8.37297	-331.524	0.23069	-36.2954	1.91e-288	1.5e-285	XP_022848889.1	late_embryogenesis_abundant_protein_1-like	Olive		IPR012349:FMN-binding split barrel
LOC111375758	8613.28	-7.93248	-244.295	0.43211	-18.3576	2.87e-75	1.18e-73	XP_022854400.1	embryonic_protein_DC-8-like	Olive		IPR001938:Thaumatin family//IPR017949:Thaumatin, conserved site//IPR037176:Osmotin/thaumatin-like superfamily
LOC111400831	9398.05	-7.81247	-224.796	0.157932	-49.4674	0	0	XP_022884021.1	myb-related_protein_305-like	Olive	PF00249:Myb-like_DNA-binding_domain	IPR000086:NUDIX hydrolase domain//IPR015797:NUDIX hydrolase-like domain superfamily//IPR020084:NUDIX hydrolase, conserved site
LOC111408228	8901.93	-7.7141	-209.979	0.229413	-33.6254	7.14e-248	3.43e-245	XP_022893786.1	L-ascorbate_oxidase_homolog	Olive	PF07731:Multicopper_oxidase//PF00394:Multicopper_oxidase//PF07732:Multicopper_oxidase	IPR036465:von Willebrand factor A-like domain superfamily
LOC111388343	33201.1	-7.66177	-202.499	0.169374	-45.2358	0	0	XP_022868791.1	exopolygalacturonase-like	Olive	PF00295:Glycosyl_hydrolases_family_28	IPR000504:RNA recognition motif domain//IPR012677:Nucleotide-binding alpha-beta plait domain superfamily//IPR035979:RNA-binding domain superfamily
LOC111397456	7733.38	-7.40414	-169.382	0.197124	-37.5608	0	0	XP_022880171.1	glucan_endo-1,3-beta-glucosidase-like	Olive	PF00332:Glycosyl_hydrolases_family_17//PF07983:X8_domain	IPR001680:WD40 repeat//IPR011047:Quinoprotein alcohol dehydrogenase-like superfamily//IPR017986:WD40-repeat-containing domain//IPR036322:WD40-repeat-containing domain superfamily//IPR015943:WD40/YVTN repeat-like-containing domain superfamily//IPR019775:WD40 repeat, conserved site
LOC111412811	27004.4	-7.1724	-144.248	0.190651	-37.6205	0	0	XP_022899478.1	glucan_endo-1,3-beta-D-glucosidase	Olive	PF07983:X8_domain//PF00332:Glycosyl_hydrolases_family_17
LOC111399299	6422.97	-7.08902	-136.147	0.214156	-33.1022	2.76e-240	1.15e-237	XP_022882323.1	sugar_transport_protein_10-like	Olive	PF00083:Sugar_(and_other)_transporter	IPR001611:Leucine-rich repeat//IPR008271:Serine/threonine-protein kinase, active site//IPR003591:Leucine-rich repeat, typical subtype//IPR032675:Leucine-rich repeat domain superfamily//IPR000719:Protein kinase domain//IPR011009:Protein kinase-like domain superfamily//IPR017441:Protein kinase, ATP binding site
LOC111382211	5092.75	-7.01454	-129.297	0.18114	-38.7245	0	0	XP_022861884.1	dormancy-associated_protein_1-like	Olive	PF05564:Dormancy/auxin_associated_protein
LOC111400416	7526.64	-6.9968	-127.717	0.197163	-35.4874	7.69e-276	5.07e-273	XP_022883603.1	major_pollen_allergen_Lig_v_1-like	Olive	PF01190:Pollen_proteins_Ole_e_I_like	IPR028082:Periplasmic binding protein-like I//IPR017103:Ionotropic glutamate receptor, plant//IPR001320:Ionotropic glutamate receptor
LOC111395746	34547.4	-6.93063	-121.991	0.637363	-10.8739	1.53e-27	1.85e-26	XP_022877648.1	glucan_endo-1,3-beta-glucosidase_14-like	Olive	PF00332:Glycosyl_hydrolases_family_17
LOC111375310	27730.6	-6.91407	-120.598	0.163372	-42.321	0	0	XP_022853876.1	major_pollen_allergen_Lig_v_1	Olive	PF01190:Pollen_proteins_Ole_e_I_like	IPR023332:Proteasome alpha-type subunit//IPR000426:Proteasome alpha-subunit, N-terminal domain//IPR029055:Nucleophile aminohydrolases, N-terminal//IPR033812:Proteasome subunit alpha5
LOC111375309	36616.8	-6.86898	-116.888	0.160845	-42.7056	0	0	XP_022853875.1	major_pollen_allergen_Lig_v_1-like	Olive	PF01190:Pollen_proteins_Ole_e_I_like	IPR006501:Pectinesterase inhibitor domain//IPR012334:Pectin lyase fold//IPR011050:Pectin lyase fold/virulence factor//IPR033131:Pectinesterase, Asp active site//IPR035513:Invertase/pectin methylesterase inhibitor domain superfamily
LOC111406921	5401.94	-6.70518	-104.342	0.190321	-35.2309	6.72e-272	4.11e-269	XP_022892047.1	protein_C2-DOMAIN_ABA-RELATED_4-like	Olive	PF00168:C2_domain
LOC111383784	2865.87	-6.69716	-103.764	0.168154	-39.8275	0	0	XP_022863707.1	dof_zinc_finger_protein_DOF3.5-like	Olive	PF02701:Dof_domain,_zinc_finger
LOC111407028	28730.2	-6.61393	-97.9472	0.23246	-28.4519	4.62e-178	8.3e-176	XP_022892134.1	major_pollen_allergen_Ole_e_1-like	Olive	PF01190:Pollen_proteins_Ole_e_I_like	IPR036291:NAD(P)-binding domain superfamily//IPR011032:GroES-like superfamily//IPR020843:Polyketide synthase, enoylreductase domain//IPR002328:Alcohol dehydrogenase, zinc-type, conserved site
LOC111389264	78081.8	-6.6137	-97.9314	0.206245	-32.0673	1.26e-225	4.47e-223	XP_022869947.1	exopolygalacturonase-like,_transcript_variant_X4	Olive	PF00295:Glycosyl_hydrolases_family_28	IPR036322:WD40-repeat-containing domain superfamily//IPR015943:WD40/YVTN repeat-like-containing domain superfamily//IPR001680:WD40 repeat//IPR017986:WD40-repeat-containing domain
LOC111374812	15466.9	-6.59334	-96.5588	0.128846	-51.1724	0	0	XP_022853318.1	protein_NRT1/_PTR_FAMILY_3.1,_transcript_variant_X2	Olive	PF00854:POT_family
LOC111365455	3380.25	-6.58827	-96.2206	0.191846	-34.3414	1.89e-258	1.06e-255	XP_022841772.1	late_embryogenesis_abundant_protein_D-29-like,_transcript_variant_X2	Olive
LOC111374877	10353.1	-6.56974	-94.9921	0.453073	-14.5004	1.2e-47	2.75e-46	XP_022853404.1	beta-galactosidase_13-like	Olive	PF02140:Galactose_binding_lectin_domain//PF13364:Beta-galactosidase_jelly_roll_domain	IPR029044:Nucleotide-diphospho-sugar transferases
LOC111392924	3049.62	-6.50967	-91.1181	0.184234	-35.3337	1.79e-273	1.15e-270	XP_022874105.1	trans-resveratrol_di-O-methyltransferase-like	Olive	PF08100:Dimerisation_domain//PF00891:O-methyltransferase_domain	IPR006721:ATP synthase, F1 complex, epsilon subunit, mitochondrial//IPR036742:ATP synthase, F1 complex, epsilon subunit superfamily, mitochondrial
LOC111386603	4529.12	-6.44778	-87.2922	0.639425	-10.0837	6.52e-24	6.76e-23	XP_022866841.1	dihydroceramide_fatty_acyl_2-hydroxylase_FAH1-like	Olive	PF04116:Fatty_acid_hydroxylase_superfamily	IPR001222:Zinc finger, TFIIS-type//IPR012164:DNA-directed RNA polymerase subunit/transcription factor S//IPR034014:Pol III subunit C11, C-terminal zinc ribbon//IPR019761:DNA-directed RNA polymerase M, 15kDa subunit, conserved site//IPR001529:DNA-directed RNA polymerase, M/15kDa subunit
LOC111375537	16950.9	-6.43678	-86.6291	0.154025	-41.7906	0	0	XP_022854141.1	probable_pectate_lyase_P59	Olive	PF04431:Pectate_lyase,_N_terminus//PF00544:Pectate_lyase	IPR011009:Protein kinase-like domain superfamily//IPR000719:Protein kinase domain//IPR017441:Protein kinase, ATP binding site//IPR003527:Mitogen-activated protein (MAP) kinase, conserved site
LOC111399249	6376.86	-6.43174	-86.3267	0.187684	-34.2689	2.28e-257	1.26e-254	XP_022882281.1	uncharacterized_LOC111399249	Olive	PF04043:Plant_invertase/pectin_methylesterase_inhibitor
LOC111403925	32096.8	-6.41402	-85.2729	0.205124	-31.2689	1.24e-214	4.04e-212	XP_022888359.1	pectinesterase_1	Olive	PF01095:Pectinesterase	IPR008271:Serine/threonine-protein kinase, active site//IPR000719:Protein kinase domain//IPR011009:Protein kinase-like domain superfamily
LOC111366570	3976.64	-6.40972	-85.0193	0.271054	-23.6473	1.26e-123	1.05e-121	XP_022843065.1	bidirectional_sugar_transporter_SWEET5	Olive	PF03083:Sugar_efflux_transporter_for_intercellular_exchange	IPR036394:Ribosomal protein L22/L17 superfamily//IPR001063:Ribosomal protein L22/L17//IPR005721:Ribosomal protein L22/L17, eukaryotic/archaeal
LOC111367748	4889.25	-6.39042	-83.8897	0.467591	-13.6667	1.61e-42	3.17e-41	XP_022844552.1	predicted_GPI-anchored_protein_58,_transcript_variant_X2	Olive
LOC111386622	4706.17	-6.3767	-83.0958	0.221395	-28.8023	2.01e-182	3.81e-180	XP_022866858.1	pectate_lyase-like	Olive	PF04431:Pectate_lyase,_N_terminus
LOC111381112	1577.56	-6.36929	-82.6701	0.239088	-26.64	2.34e-156	3.12e-154	XP_022860607.1	cellulose_synthase-like_protein_D1	Olive	PF03552:Cellulose_synthase	IPR000558:Histone H2B//IPR009072:Histone-fold
LOC111382476	14599.4	-6.36772	-82.5798	0.428887	-14.8471	7.27e-50	1.75e-48	XP_022862236.1	ATPase_8,_plasma_membrane-type,_transcript_variant_X2	Olive	PF00122:E1-E2_ATPase//PF00702:haloacid_dehalogenase-like_hydrolase
LOC111397057	3797.11	-6.34717	-81.4118	0.27387	-23.1759	7.98e-119	6.3e-117	XP_022879526.1	callose_synthase_5-like	Olive	PF04652:Vta1_like//PF02364:1,3-beta-glucan_synthase_component//PF14288:1,3-beta-glucan_synthase_subunit_FKS1,_domain-1	IPR018253:DnaJ domain, conserved site//IPR036869:Chaperone J-domain superfamily//IPR001623:DnaJ domain
LOC111385282	2887.67	-6.34471	-81.2734	0.650027	-9.76069	1.66e-22	1.63e-21		beta-galactosidase_14-like	Olive		IPR003591:Leucine-rich repeat, typical subtype//IPR032675:Leucine-rich repeat domain superfamily
LOC111373189	35166.7	-6.31409	-79.5667	0.179806	-35.1162	3.82e-270	2.29e-267	XP_022851456.1	pectinesterase-like	Olive	PF04043:Plant_invertase/pectin_methylesterase_inhibitor//PF01095:Pectinesterase	IPR029044:Nucleotide-diphospho-sugar transferases
LOC111404640	3132.76	-6.3095	-79.3138	0.213068	-29.6126	1.03e-192	2.23e-190			Olive
LOC111389197	21185.8	-6.25746	-76.504	0.230997	-27.0889	1.33e-161	1.89e-159	XP_022869852.1	ATPase_8,_plasma_membrane-type-like,_transcript_variant_X2	Olive	PF00690:Cation_transporter/ATPase,_N-terminus//PF00122:E1-E2_ATPase//PF00702:haloacid_dehalogenase-like_hydrolase	IPR027417:P-loop containing nucleoside triphosphate hydrolase//IPR038005:Virus X resistance protein-like, coiled-coil domain//IPR003591:Leucine-rich repeat, typical subtype//IPR032675:Leucine-rich repeat domain superfamily
LOC111402683	20490	-6.24842	-76.0261	0.16068	-38.8873	0	0	XP_022886813.1	major_pollen_allergen_Lig_v_1-like	Olive	PF01190:Pollen_proteins_Ole_e_I_like	IPR000719:Protein kinase domain//IPR008271:Serine/threonine-protein kinase, active site//IPR000742:EGF-like domain//IPR001881:EGF-like calcium-binding domain//IPR000152:EGF-type aspartate/asparagine hydroxylation site//IPR018097:EGF-like calcium-binding, conserved site//IPR011009:Protein kinase-like domain superfamily
LOC111407025	22125.9	-6.23159	-75.1443	0.176436	-35.3192	2.98e-273	1.89e-270	XP_022892131.1	major_pollen_allergen_Ole_e_1-like	Olive	PF01190:Pollen_proteins_Ole_e_I_like	IPR039411:Ribosomal biogenesis NSA2 family
LOC111400755	5491.77	-6.22832	-74.9739	0.230461	-27.0255	7.42e-161	1.03e-158	XP_022883908.1	anther-specific_protein_LAT52-like	Olive	PF01190:Pollen_proteins_Ole_e_I_like
LOC111384818	4369.55	-6.20335	-73.6874	0.184463	-33.6292	6.29e-248	3.07e-245	XP_022864919.1	pollen-specific_leucine-rich_repeat_extensin-like_protein_1	Olive
LOC111402550	13352.6	-6.17164	-72.0858	0.23252	-26.5424	3.14e-155	4.13e-153	XP_022886702.1	anther-specific_protein_LAT52-like	Olive	PF01190:Pollen_proteins_Ole_e_I_like	IPR010920:LSM domain superfamily//IPR001163:LSM domain, eukaryotic/archaea-type//IPR016487:Sm-like protein Lsm6/SmF//IPR034100:Small nuclear ribonucleoprotein F
LOC111406051	39167.4	-6.14953	-70.9892	0.202293	-30.3991	5.65e-203	1.55e-200	XP_022891003.1	major_pollen_allergen_Ole_e_1-like	Olive	PF01190:Pollen_proteins_Ole_e_I_like	IPR036249:Thioredoxin-like superfamily//IPR002109:Glutaredoxin
LOC111374924	20971.9	-6.14699	-70.8646	0.108146	-56.8398	0	0	XP_022853459.1	repetitive_proline-rich_cell_wall_protein_2-like,_transcript_variant_X4	Olive	PF01190:Pollen_proteins_Ole_e_I_like	IPR016135:Ubiquitin-conjugating enzyme/RWD-like//IPR000608:Ubiquitin-conjugating enzyme E2
LOC111411073	4143.82	-6.14302	-70.6699	0.242891	-25.2913	3.98e-141	4.28e-139	XP_022897412.1	LIM_domain-containing_protein_PLIM2c-like	Olive	PF00412:LIM_domain	IPR036771:F0F1 ATP synthase delta/epsilon subunit, N-terminal//IPR001469:ATP synthase, F1 complex, delta/epsilon subunit
LOC111396419	3227.47	-6.13164	-70.1145	0.198771	-30.8478	5.99e-209	1.74e-206	XP_022878623.1	putative_clathrin_assembly_protein_At1g25240	Olive	PF07651:ANTH_domain	IPR038595:LURP-one-related superfamily//IPR025659:Tubby-like, C-terminal
LOC111412809	2744.26	-6.12744	-69.9105	0.256063	-23.9294	1.51e-126	1.33e-124	XP_022899476.1	putative_proline-rich_receptor-like_protein_kinase_PERK6	Olive	PF07714:Protein_tyrosine_kinase	IPR005202:Transcription factor GRAS
LOC111407024	14617.7	-6.12504	-69.7943	0.180996	-33.8408	4.96e-251	2.65e-248	XP_022892130.1	major_pollen_allergen_Ole_e_1-like	Olive	PF01190:Pollen_proteins_Ole_e_I_like	IPR005225:Small GTP-binding protein domain//IPR027417:P-loop containing nucleoside triphosphate hydrolase//IPR003578:Small GTPase Rho
LOC111402363	4115.61	-6.11257	-69.1936	0.183994	-33.2215	5.26e-242	2.27e-239	XP_022886369.1	protein_CELLULOSE_SYNTHASE_INTERACTIVE_3-like	Olive	PF00168:C2_domain//PF00514:Armadillo/beta-catenin-like_repeat	IPR036865:CRAL-TRIO lipid binding domain superfamily//IPR001251:CRAL-TRIO lipid binding domain
LOC111382506	5038.68	-6.11184	-69.1587	0.278652	-21.9336	1.24e-106	8.19e-105	XP_022862277.1	probable_boron_transporter_7,_transcript_variant_X2	Olive	PF00955:HCO3-_transporter_family
LOC111369809	9085.49	-6.09541	-68.3756	0.220655	-27.6242	5.71e-168	8.8e-166	XP_022847259.1	U-box_domain-containing_protein_35-like,_transcript_variant_X3	Olive	PF00069:Protein_kinase_domain//PF00582:Universal_stress_protein_family	IPR029020:Ammonium/urea transporter//IPR001905:Ammonium transporter//IPR018047:Ammonium transporter, conserved site
LOC111370917	4441.26	-6.07275	-67.3099	0.195906	-30.9982	5.69e-211	1.71e-208	XP_022848588.1	probable_WRKY_transcription_factor_2	Olive	PF03106:WRKY_DNA_-binding_domain
LOC111376342	20616.7	-6.06653	-67.0205	0.169812	-35.725	1.62e-279	1.11e-276	XP_022855062.1	E3_ubiquitin-protein_ligase_rnf8-B-like	Olive		IPR001611:Leucine-rich repeat//IPR008271:Serine/threonine-protein kinase, active site//IPR032675:Leucine-rich repeat domain superfamily//IPR011009:Protein kinase-like domain superfamily//IPR000719:Protein kinase domain//IPR003591:Leucine-rich repeat, typical subtype//IPR017441:Protein kinase, ATP binding site
LOC111406052	26395.6	-6.04845	-66.1859	0.18669	-32.3984	2.89e-230	1.13e-227	XP_022891004.1	major_pollen_allergen_Ole_e_1-like	Olive	PF01190:Pollen_proteins_Ole_e_I_like
LOC111371494	38444.1	-6.04699	-66.119	0.158573	-38.1338	0	0	XP_022849290.1	pectinesterase-like	Olive	PF04043:Plant_invertase/pectin_methylesterase_inhibitor//PF01095:Pectinesterase	IPR000719:Protein kinase domain//IPR032675:Leucine-rich repeat domain superfamily//IPR011009:Protein kinase-like domain superfamily
LOC111405108	18460.5	-6.04206	-65.8933	0.1684	-35.8792	6.44e-282	4.61e-279	XP_022889601.1	beta-fructofuranosidase,_insoluble_isoenzyme_1-like	Olive	PF08244:Glycosyl_hydrolases_family_32_C_terminal//PF00251:Glycosyl_hydrolases_family_32_N-terminal_domain	IPR036291:NAD(P)-binding domain superfamily//IPR029753:D-isomer specific 2-hydroxyacid dehydrogenase, NAD-binding domain conserved site//IPR006236:D-3-phosphoglycerate dehydrogenase//IPR029009:Allosteric substrate binding domain superfamily//IPR029752:D-isomer specific 2-hydroxyacid dehydrogenase, NAD-binding domain conserved site 1//IPR002912:ACT domain
LOC111381448	2454.1	-6.03614	-65.6233	0.486565	-12.4056	2.44e-35	3.84e-34	XP_022860996.1	proline-rich_receptor-like_protein_kinase_PERK1	Olive	PF07714:Protein_tyrosine_kinase
LOC111384353	4202.06	-6.03223	-65.4458	0.172476	-34.9744	5.52e-268	3.26e-265	XP_022864392.1	calcium-dependent_protein_kinase_24-like	Olive	PF13833:EF-hand_domain_pair//PF00069:Protein_kinase_domain//PF13499:EF-hand_domain_pair	IPR000225:Armadillo//IPR016024:Armadillo-type fold//IPR011989:Armadillo-like helical//IPR013083:Zinc finger, RING/FYVE/PHD-type//IPR003613:U box domain
LOC111391607	8189.73	-6.03159	-65.4168	0.264373	-22.8147	3.28e-115	2.42e-113	XP_022872622.1	anther-specific_protein_LAT52-like	Olive	PF01190:Pollen_proteins_Ole_e_I_like
LOC111400823	43161.4	-6.01143	-64.5089	0.182315	-32.9727	2e-238	8.2e-236	XP_022884005.1	probable_pectate_lyase_P59	Olive	PF04431:Pectate_lyase,_N_terminus//PF00544:Pectate_lyase	IPR001611:Leucine-rich repeat//IPR000719:Protein kinase domain//IPR032675:Leucine-rich repeat domain superfamily//IPR017441:Protein kinase, ATP binding site//IPR008271:Serine/threonine-protein kinase, active site//IPR011009:Protein kinase-like domain superfamily//IPR003591:Leucine-rich repeat, typical subtype
LOC111407023	32804	-6.00883	-64.3931	0.159743	-37.6155	0	0	XP_022892129.1	major_pollen_allergen_Ole_e_1-like	Olive	PF01190:Pollen_proteins_Ole_e_I_like	IPR001270:ClpA/B family//IPR036628:Clp, N-terminal domain superfamily//IPR027417:P-loop containing nucleoside triphosphate hydrolase//IPR003593:AAA+ ATPase domain//IPR018368:ClpA/B, conserved site 1//IPR001943:UVR domain//IPR019489:Clp ATPase, C-terminal//IPR028299:ClpA/B, conserved site 2
LOC111376349	14819.8	-6.00093	-64.0414	0.16482	-36.409	3.07e-290	2.46e-287	XP_022855073.1	uncharacterized_LOC111376349	Olive
LOC111395627	9443.12	-5.99765	-63.896	0.235931	-25.4212	1.47e-142	1.62e-140	XP_022877479.1	beta-glucuronosyltransferase_GlcAT14A-like	Olive	PF02485:Core-2/I-Branching_enzyme	IPR019833:Manganese/iron superoxide dismutase, binding site//IPR001189:Manganese/iron superoxide dismutase//IPR036324:Manganese/iron superoxide dismutase, N-terminal domain superfamily//IPR036314:Manganese/iron superoxide dismutase, C-terminal domain superfamily
LOC111385192	3986.9	-5.97141	-62.7442	0.161165	-37.0515	1.7e-300	1.5e-297	XP_022865332.1	putative_clathrin_assembly_protein_At1g03050,_transcript_variant_X2	Olive	PF07651:ANTH_domain
LOC111407027	27447	-5.96591	-62.5054	0.185664	-32.1329	1.53e-226	5.48e-224	XP_022892133.1	major_pollen_allergen_Ole_e_1-like	Olive	PF01190:Pollen_proteins_Ole_e_I_like	IPR000270:PB1 domain
LOC111407026	23558.8	-5.96549	-62.4871	0.164937	-36.1683	1.92e-286	1.43e-283	XP_022892132.1	major_pollen_allergen_Ole_e_1-like	Olive	PF01190:Pollen_proteins_Ole_e_I_like	IPR013088:Zinc finger, NHR/GATA-type//IPR000679:Zinc finger, GATA-type//IPR010399:Tify domain//IPR010402:CCT domain
LOC111399808	2948.92	-5.95788	-62.1585	0.184048	-32.3713	6.95e-230	2.66e-227	XP_022883071.1	auxin-responsive_protein_SAUR41-like,_transcript_variant_X3	Olive	PF02519:Auxin_responsive_protein	IPR001356:Homeobox domain//IPR002913:START domain//IPR009057:Homeobox-like domain superfamily//IPR017970:Homeobox, conserved site
LOC111407022	43753.4	-5.95653	-62.1006	0.197821	-30.1107	3.51e-199	8.75e-197	XP_022892128.1	major_pollen_allergen_Ole_e_1-like	Olive	PF01190:Pollen_proteins_Ole_e_I_like	IPR011990:Tetratricopeptide-like helical domain superfamily//IPR002885:Pentatricopeptide repeat
LOC111381068	23874.1	-5.94314	-61.5269	0.205308	-28.9475	3.02e-184	5.94e-182	XP_022860549.1	expansin-A11-like,_transcript_variant_X2	Olive	PF03330:Lytic_transglycolase
LOC111403954	3883.77	-5.93097	-61.0098	0.175283	-33.8365	5.73e-251	3.01e-248	XP_022888411.1	COBRA-like_protein_10	Olive	PF04833:COBRA-like_protein	IPR013083:Zinc finger, RING/FYVE/PHD-type//IPR001841:Zinc finger, RING-type
LOC111407021	36717.1	-5.91686	-60.416	0.205383	-28.8089	1.66e-182	3.18e-180	XP_022892127.1	major_pollen_allergen_Ole_e_1	Olive	PF01190:Pollen_proteins_Ole_e_I_like	IPR018490:Cyclic nucleotide-binding-like//IPR002110:Ankyrin repeat//IPR000595:Cyclic nucleotide-binding domain//IPR003938:Potassium channel, voltage-dependent, EAG/ELK/ERG//IPR036770:Ankyrin repeat-containing domain superfamily//IPR014710:RmlC-like jelly roll fold//IPR020683:Ankyrin repeat-containing domain//IPR021789:KHA domain
LOC111404918	29911	-5.90871	-60.0756	0.205584	-28.7411	1.17e-181	2.19e-179	XP_022889410.1	exopolygalacturonase-like	Olive	PF00295:Glycosyl_hydrolases_family_28	IPR001232:S-phase kinase-associated protein 1-like//IPR011333:SKP1/BTB/POZ domain superfamily//IPR016897:S-phase kinase-associated protein 1//IPR036296:SKP1-like, dimerisation domain superfamily
LOC111368831	2147.19	-5.90559	-59.9458	0.154219	-38.2934	0	0	XP_022846068.1	ethylene-responsive_transcription_factor_ERF027-like	Olive	PF00847:AP2_domain	IPR036188:FAD/NAD(P)-binding domain superfamily
LOC111411045	8073.39	-5.90085	-59.7492	0.224393	-26.297	2.08e-152	2.58e-150	XP_022897387.1	putative_proline-rich_receptor-like_protein_kinase_PERK6	Olive	PF16101:Proline-rich_membrane_anchor_1//PF07714:Protein_tyrosine_kinase	IPR027417:P-loop containing nucleoside triphosphate hydrolase
LOC111376333	9452.01	-5.88998	-59.3009	0.177178	-33.2434	2.55e-242	1.11e-239	XP_022855050.1	anther-specific_protein_BCP1-like	Olive
LOC111367524	2645.59	-5.88744	-59.1964	0.21775	-27.0376	5.34e-161	7.46e-159	XP_022844222.1	inactive_TPR_repeat-containing_thioredoxin_TTL3-like	Olive	PF13432:Tetratricopeptide_repeat//PF00085:Thioredoxin//PF00515:Tetratricopeptide_repeat	IPR036396:Cytochrome P450 superfamily//IPR002401:Cytochrome P450, E-class, group I//IPR017972:Cytochrome P450, conserved site//IPR001128:Cytochrome P450
LOC111385754	5235.81	-5.88173	-58.9626	0.231402	-25.4178	1.6e-142	1.75e-140	XP_022865938.1	probable_carbohydrate_esterase_At4g34215	Olive	PF03629:Carbohydrate_esterase,_sialic_acid-specific_acetylesterase	IPR016088:Chalcone isomerase, 3-layer sandwich//IPR016089:Chalcone isomerase, orthogonal bundle domain superfamily//IPR036298:Chalcone isomerase superfamily
LOC111385762	8952.57	-5.88146	-58.9515	0.147754	-39.8057	0	0	XP_022865946.1	probable_carbohydrate_esterase_At4g34215	Olive	PF03629:Carbohydrate_esterase,_sialic_acid-specific_acetylesterase	IPR037151:Alpha-ketoglutarate-dependent dioxygenase AlkB-like superfamily
LOC111382291	2851.59	-5.87414	-58.6534	1.12499	-5.22152	1.77e-07	6.73e-07	XP_022861978.1	sugar_transport_protein_8-like	Olive	PF00083:Sugar_(and_other)_transporter	IPR035898:TAZ domain superfamily//IPR000210:BTB/POZ domain//IPR000197:Zinc finger, TAZ-type//IPR011333:SKP1/BTB/POZ domain superfamily
LOC111402595	3769.92	-5.8732	-58.6149	0.43504	-13.5004	1.56e-41	2.97e-40	XP_022886744.1	phosphatidylinositol_3,4,5-trisphosphate_3-phosphatase_and_protein-tyrosine-phosphatase_PTEN1	Olive	PF10409:C2_domain_of_PTEN_tumour-suppressor_protein//PF13350:Tyrosine_phosphatase_family
LOC111404457	10000.3	-5.86662	-58.3482	0.154923	-37.868	0	0	XP_022889030.1	anther-specific_protein_BCP1	Olive		IPR001563:Peptidase S10, serine carboxypeptidase//IPR029058:Alpha/Beta hydrolase fold//IPR033124:Serine carboxypeptidases, histidine active site//IPR018202:Serine carboxypeptidase, serine active site
LOC111376358	8911.1	-5.85349	-57.8196	0.194993	-30.019	5.54e-198	1.32e-195	XP_022855083.1	uncharacterized_LOC111376358	Olive	PF04043:Plant_invertase/pectin_methylesterase_inhibitor	IPR011993:PH-like domain superfamily//IPR000156:Ran binding domain
LOC111372742	1893.62	-5.85201	-57.7603	0.243844	-23.999	2.85e-127	2.53e-125	XP_022850901.1	protein_MALE_DISCOVERER_2-like,_transcript_variant_X2	Olive	PF13855:Leucine_rich_repeat//PF07714:Protein_tyrosine_kinase//PF08263:Leucine_rich_repeat_N-terminal_domain	IPR036296:SKP1-like, dimerisation domain superfamily//IPR011333:SKP1/BTB/POZ domain superfamily//IPR001232:S-phase kinase-associated protein 1-like
LOC111378276	33875.5	-5.85062	-57.7048	0.160017	-36.5624	1.13e-292	9.28e-290	XP_022857219.1	L-ascorbate_oxidase_homolog	Olive	PF07731:Multicopper_oxidase//PF00394:Multicopper_oxidase//PF07732:Multicopper_oxidase
LOC111404984	4045.71	-5.84924	-57.6495	0.248243	-23.5625	9.34e-123	7.7e-121	XP_022889471.1	glucomannan_4-beta-mannosyltransferase_9-like	Olive	PF13641:Glycosyltransferase_like_family_2
LOC111409294	16490.3	-5.83804	-57.2037	0.144339	-40.4468	0	0	XP_022895084.1	vegetative_cell_wall_protein_gp1-like	Olive		IPR019775:WD40 repeat, conserved site//IPR015943:WD40/YVTN repeat-like-containing domain superfamily//IPR006594:LIS1 homology motif//IPR001680:WD40 repeat//IPR007582:TFIID subunit TAF5, NTD2 domain//IPR037264:TFIID subunit TAF5, NTD2 domain superfamily//IPR020472:G-protein beta WD-40 repeat//IPR036322:WD40-repeat-containing domain superfamily//IPR017986:WD40-repeat-containing domain
LOC111381744	5192.44	-5.82599	-56.728	0.226785	-25.6894	1.53e-145	1.73e-143	XP_022861327.1	exopolygalacturonase-like	Olive	PF00295:Glycosyl_hydrolases_family_28	IPR029063:S-adenosyl-L-methionine-dependent methyltransferase
LOC111379874	8374.57	-5.8212	-56.54	0.176908	-32.9052	1.85e-237	7.5e-235	XP_022859080.1	probable_serine/threonine-protein_kinase_PBL21,_transcript_variant_X3	Olive	PF00069:Protein_kinase_domain	IPR017853:Glycoside hydrolase superfamily
LOC111371401	58454.4	-5.81465	-56.2839	0.183881	-31.6218	1.85e-219	6.17e-217	XP_022849132.1	L-ascorbate_oxidase_homolog	Olive	PF00394:Multicopper_oxidase//PF07731:Multicopper_oxidase//PF07732:Multicopper_oxidase	IPR000719:Protein kinase domain//IPR001881:EGF-like calcium-binding domain//IPR018097:EGF-like calcium-binding, conserved site//IPR011009:Protein kinase-like domain superfamily//IPR000152:EGF-type aspartate/asparagine hydroxylation site//IPR000742:EGF-like domain//IPR013032:EGF-like, conserved site//IPR008271:Serine/threonine-protein kinase, active site
LOC111408193	1956.48	-5.81443	-56.2753	0.202651	-28.6919	4.81e-181	8.9e-179	XP_022893757.1	uncharacterized_LOC111408193	Olive		IPR011025:G protein alpha subunit, helical insertion//IPR001019:Guanine nucleotide binding protein (G-protein), alpha subunit
LOC111393624	1613.8	-5.79841	-55.654	0.262766	-22.0668	6.59e-108	4.44e-106	XP_022875017.1	probable_magnesium_transporter_NIPA1,_transcript_variant_X7	Olive	PF05653:Magnesium_transporter_NIPA	IPR001841:Zinc finger, RING-type//IPR041888:ZN598/Hel2, RING finger//IPR013087:Zinc finger C2H2-type
LOC111366558	2235.9	-5.79106	-55.3712	0.18653	-31.0462	1.28e-211	3.96e-209	XP_022843060.1	uncharacterized_LOC111366558	Olive
LOC111385710	15113.1	-5.78694	-55.2132	0.19352	-29.9036	1.77e-196	3.99e-194	XP_022865897.1	sugar_transport_protein_8-like	Olive	PF00083:Sugar_(and_other)_transporter	IPR042277:Vacuolar protein sorting-associated protein IST1-like
LOC111374323	61893.4	-5.77504	-54.7597	0.198162	-29.1431	1.02e-186	2.06e-184	XP_022852746.1	pectinesterase-like	Olive	PF01095:Pectinesterase//PF04043:Plant_invertase/pectin_methylesterase_inhibitor
LOC111381494	2563.79	-5.77295	-54.6802	0.18799	-30.7089	4.33e-207	1.22e-204		uncharacterized_protein_LOC111381494	Olive		IPR027417:P-loop containing nucleoside triphosphate hydrolase
LOC111382034	4124.28	-5.76281	-54.2972	0.268773	-21.4412	5.52e-102	3.39e-100		glycerophosphodiester_phosphodiesterase_GDPDL7-like	Olive
LOC111369810	7124.29	-5.74731	-53.717	0.204034	-28.1683	1.43e-174	2.4e-172	XP_022847245.1	receptor-like_protein_kinase_ANXUR1	Olive	PF12819:Malectin-like_domain//PF07714:Protein_tyrosine_kinase	IPR034164:Pepsin-like domain//IPR033121:Peptidase family A1 domain//IPR021109:Aspartic peptidase domain superfamily
LOC111374220	3330.12	-5.7447	-53.6199	0.202167	-28.4156	1.3e-177	2.28e-175		kinase-interacting_protein_1-like	Olive		IPR000644:CBS domain
LOC111383572	2809.83	-5.74087	-53.4779	0.551894	-10.4021	2.42e-25	2.67e-24	XP_022863454.1	uncharacterized_LOC111383572	Olive	PF05627:Cleavage_site_for_pathogenic_type_III_effector_avirulence_factor_Avr
LOC111368858	3852.04	-5.73122	-53.1214	0.210844	-27.1823	1.05e-162	1.52e-160	XP_022846107.1	basic_form_of_pathogenesis-related_protein_1-like	Olive	PF00188:Cysteine-rich_secretory_protein_family	IPR036514:SGNH hydrolase superfamily
[truncated: 1,739 more rows]
