# Supplementary material for: Characterization of Transcriptome Dynamics during Early Fruit Development in Olive (Olea europaea L.)
Source: Int J Mol Sci. 2023 Jan 4;24(2):961. doi: 10.3390/ijms24020961 (PMC9864153; doi:10.3390/ijms24020961)
Supplement: Supplementary file 1 [file ijms-24-00961-s001.zip › Table S8.xlsx]

## Sheet: DE_Specific_P0
Suplementary Table S8. Genes exclusively expressed in olive fruit at selected stage
Genes	baseMean	log2FoldChange	FoldChange	lfcSE	stat	pvalue	padj	Gene_ID	description	Organism	pfam	Interpro
LOC111370572	15225.9	-13.1792	-9275.37	1.16551	-11.3076	1.2e-29	1.57e-28	XP_022848109.1	glycine-rich_cell_wall_structural_protein_1.0-like	Olive
LOC111374547	3144.97	-12.0106	-4126.14	0.777905	-15.4396	8.86e-54	2.35e-52	XP_022852994.1	stress-induced_protein_KIN2-like	Olive
LOC111368749	10862.3	-11.6822	-3286.24	0.971193	-12.0287	2.51e-33	3.73e-32	XP_022845943.1	stem-specific_protein_TSJT1-like	Olive	PF12481:Aluminium_induced_protein
LOC111404689	402.776	-11.0298	-2090.71	1.40234	-7.86526	3.68e-15	2.48e-14		uncharacterized_protein	Olive
LOC111378644	1241.33	-10.4624	-1410.85	1.65636	-6.31646	2.68e-10	1.31e-09		uncharacterized_protein	Olive
LOC111372711	1856.7	-10.1173	-1110.77	1.82715	-5.53723	3.07e-08	1.26e-07	XP_022850868.1	major_pollen_allergen_Lig_v_1-like	Olive	PF01190:Pollen_proteins_Ole_e_I_like	IPR017441:Protein kinase, ATP binding site//IPR011009:Protein kinase-like domain superfamily//IPR008271:Serine/threonine-protein kinase, active site//IPR000719:Protein kinase domain
LOC111385879	1076.54	-9.86903	-935.137	0.606877	-16.262	1.84e-59	5.59e-58	XP_022869103.1	uncharacterized_protein	Olive	PF04862:Protein_of_unknown_function_(DUF642)
LOC111396530	1230.73	-9.84642	-920.593	0.570254	-17.2667	8.38e-67	2.89e-65	XP_022878712.1	L-ascorbate_oxidase_homolog	Olive	PF00394:Multicopper_oxidase//PF07731:Multicopper_oxidase//PF07732:Multicopper_oxidase	IPR019775:WD40 repeat, conserved site//IPR020472:G-protein beta WD-40 repeat//IPR001680:WD40 repeat//IPR017986:WD40-repeat-containing domain//IPR015943:WD40/YVTN repeat-like-containing domain superfamily//IPR036322:WD40-repeat-containing domain superfamily
LOC111383316	175.721	-9.83368	-912.501	1.39882	-7.02999	2.07e-12	1.17e-11		vicilin-like_seed_storage_protein_At2g28490	Olive		IPR013784:Carbohydrate-binding-like fold//IPR029413:Rhamnogalacturonan lyase, domain II//IPR008979:Galactose-binding-like domain superfamily
LOC111401715	343.121	-9.80893	-896.978	1.03375	-9.48864	2.34e-21	2.17e-20	XP_022885340.1	vignain-like	Olive	PF00112:Papain_family_cysteine_protease//PF08246:Cathepsin_propeptide_inhibitor_domain_(I29)	IPR009018:Signal recognition particle, SRP9/SRP14 subunit
LOC111397691	2989.08	-9.47066	-709.5	0.358935	-26.3854	2.01e-153	2.54e-151	XP_022880457.1	alpha-1,4-glucan-protein_synthase_[UDP-forming]_1-like	Olive	PF03214:Reversibly_glycosylated_polypeptide
LOC111376679	50.1231	-9.45289	-700.813	1.48412	-6.36936	1.9e-10	9.39e-10	XP_022855416.1	probable_E3_ubiquitin-protein_ligase_BAH1-like	Olive	PF13445:RING-type_zinc-finger	IPR000008:C2 domain//IPR035892:C2 domain superfamily
LOC111382436	1148.63	-9.39008	-670.959	0.512516	-18.3215	5.57e-75	2.27e-73	XP_022862182.1	plasma_membrane_ATPase_4-like	Olive	PF00122:E1-E2_ATPase//PF00702:haloacid_dehalogenase-like_hydrolase//PF00690:Cation_transporter/ATPase,_N-terminus	IPR018501:DDT domain
LOC111412810	505.553	-9.37533	-664.132	0.746744	-12.5549	3.73e-36	6.06e-35	XP_022899477.1	glucan_endo-1,3-beta-D-glucosidase-like	Olive	PF07983:X8_domain//PF00332:Glycosyl_hydrolases_family_17
LOC111366861	576.801	-9.36279	-658.384	1.57186	-5.95651	2.58e-09	1.17e-08		uncharacterized_protein	Olive		IPR009057:Homeobox-like domain superfamily//IPR001005:SANT/Myb domain//IPR036565:Mur-like, catalytic domain superfamily
LOC111365434	205.647	-9.08755	-544.034	1.16669	-7.7892	6.74e-15	4.49e-14	XP_022841745.1	cytochrome_c_oxidase_subunit_6a,_mitochondrial-like	Olive	PF02046:Cytochrome_c_oxidase_subunit_VIa	IPR035892:C2 domain superfamily//IPR000008:C2 domain
LOC111367772	684.556	-9.00028	-512.098	0.563635	-15.9683	2.13e-57	6.14e-56	XP_022844594.1	COP1-interactive_protein_1-like,_transcript_variant_X2	Olive	PF07765:KIP1-like_protein
LOC111379532	369.915	-8.90444	-479.185	0.742719	-11.989	4.06e-33	6e-32	XP_022858692.1	uncharacterized_LOC111379532	Olive	PF13578:Methyltransferase_domain	IPR018247:EF-Hand 1, calcium-binding site//IPR002048:EF-hand domain//IPR017441:Protein kinase, ATP binding site//IPR011009:Protein kinase-like domain superfamily//IPR011992:EF-hand domain pair//IPR008271:Serine/threonine-protein kinase, active site//IPR000719:Protein kinase domain
LOC111383887	896.687	-8.877	-470.158	0.483199	-18.3713	2.23e-75	9.16e-74		cellulose_synthase-like_protein_D4	Olive		IPR001179:FKBP-type peptidyl-prolyl cis-trans isomerase domain
LOC111411160	621.621	-8.68015	-410.19	1.70085	-5.10341	3.34e-07	1.23e-06	XP_022897487.1	WAT1-related_protein_At1g09380-like	Olive	PF00892:EamA-like_transporter_family
LOC111410960	798.989	-8.55425	-375.912	0.485724	-17.6113	2.02e-69	7.33e-68	XP_022897316.1	late_embryogenesis_abundant_protein_47-like	Olive	PF04927:Seed_maturation_protein
LOC111402520	326.434	-8.41896	-342.263	0.667883	-12.6054	1.97e-36	3.22e-35	XP_022886658.1	ABC_transporter_G_family_member_9	Olive	PF00005:ABC_transporter//PF01061:ABC-2_type_transporter	IPR002885:Pentatricopeptide repeat//IPR011990:Tetratricopeptide-like helical domain superfamily
LOC111376781	810.138	-8.23909	-302.144	0.910787	-9.04612	1.48e-19	1.26e-18	XP_022855550.1	guanosine_nucleotide_diphosphate_dissociation_inhibitor_At5g09550	Olive	PF00996:GDP_dissociation_inhibitor	IPR016159:Cullin repeat-like-containing domain superfamily
LOC111374240	669.172	-8.19352	-292.749	0.449414	-18.2316	2.9e-74	1.16e-72	XP_022852660.1	LOB_domain-containing_protein_27-like	Olive	PF03195:Lateral_organ_boundaries_(LOB)_domain	IPR009078:Ferritin-like superfamily//IPR012347:Ferritin-like//IPR009040:Ferritin-like diiron domain
LOC111378423	165.075	-8.17586	-289.187	0.865923	-9.44178	3.66e-21	3.36e-20			Olive		IPR000270:PB1 domain//IPR006564:Zinc finger, PMZ-type//IPR007527:Zinc finger, SWIM-type
LOC111367829	162.431	-8.14859	-283.773	0.872875	-9.33535	1.01e-20	9e-20	XP_022844659.1	ABC_transporter_G_family_member_29-like	Olive	PF08370:Plant_PDR_ABC_transporter_associated//PF00005:ABC_transporter//PF01061:ABC-2_type_transporter//PF14510:ABC-transporter_N-terminal	IPR037975:Class XI myosin, cargo binding domain//IPR036018:Plant myosin, class XI, motor domain//IPR001609:Myosin head, motor domain//IPR002710:Dilute domain//IPR000048:IQ motif, EF-hand binding site//IPR004009:Myosin, N-terminal, SH3-like//IPR036961:Kinesin motor domain superfamily//IPR027417:P-loop containing nucleoside triphosphate hydrolase
LOC111370525	108.419	-8.13711	-281.524	1.06197	-7.66227	1.83e-14	1.18e-13			Olive
LOC111380086	95.6342	-7.95383	-247.938	1.34142	-5.9294	3.04e-09	1.37e-08	XP_022859318.1	fatty-acid-binding_protein_2-like	Olive	PF16035:Chalcone_isomerase_like
LOC111377473	173.673	-7.82927	-227.429	0.751816	-10.4138	2.14e-25	2.37e-24	XP_022856348.1	uncharacterized_LOC111377473	Olive	PF09790:Hyccin	IPR004827:Basic-leucine zipper domain
LOC111391121	599.278	-7.80439	-223.54	0.421394	-18.5204	1.41e-76	5.9e-75	XP_022872037.1	pectin_acetylesterase_8-like,_transcript_variant_X2	Olive	PF03283:Pectinacetylesterase	IPR023214:HAD superfamily
LOC111383532	73.84	-7.57322	-190.444	1.05837	-7.15559	8.33e-13	4.85e-12	XP_022863413.1	cation/H(+)_antiporter_15-like	Olive	PF00999:Sodium/hydrogen_exchanger_family	IPR000555:JAB1/MPN/MOV34 metalloenzyme domain//IPR037518:MPN domain//IPR027524:Eukaryotic translation initiation factor 3 subunit H
LOC111401218	282.492	-7.52122	-183.701	0.563204	-13.3543	1.12e-40	2.08e-39	XP_022884626.1	microsomal_glutathione_S-transferase_3	Olive	PF01124:MAPEG_family	IPR035896:AN1-like Zinc finger//IPR000058:Zinc finger, AN1-type//IPR002653:Zinc finger, A20-type
LOC111375605	201.724	-7.46024	-176.099	0.657099	-11.3533	7.14e-30	9.4e-29	XP_022854226.1	tetraspanin-8-like	Olive	PF00335:Tetraspanin_family	IPR020588:DNA recombination and repair protein RecA-like, ATP-binding domain//IPR033925:Rad51/DMC1/RadA//IPR027417:P-loop containing nucleoside triphosphate hydrolase//IPR016467:DNA recombination and repair protein, RecA-like
LOC111401246	271.109	-7.4596	-176.02	0.538093	-13.863	1.06e-43	2.16e-42			Olive
LOC111410528	392.773	-7.42715	-172.105	0.465339	-15.9607	2.4e-57	6.92e-56	XP_022896682.1	mechanosensitive_ion_channel_protein_6-like	Olive	PF00924:Mechanosensitive_ion_channel	IPR025776:Histone-lysine N-methyltransferase SUVR4/SUVR1/SUVR2//IPR001214:SET domain//IPR007728:Pre-SET domain//IPR043017:WIYLD domain superfamily
LOC111403615	164.929	-7.42203	-171.496	0.682564	-10.8738	1.54e-27	1.86e-26	XP_022887954.1	transcription_factor_MYB44-like	Olive	PF00249:Myb-like_DNA-binding_domain	IPR029063:S-adenosyl-L-methionine-dependent methyltransferase
LOC111396414	665.994	-7.3658	-164.94	0.369939	-19.9108	3.28e-88	1.68e-86	XP_022878619.1	external_alternative_NAD(P)H-ubiquinone_oxidoreductase_B4,_mitochondrial-like	Olive	PF07992:Pyridine_nucleotide-disulphide_oxidoreductase	IPR004328:BRO1 domain//IPR038499:BRO1 domain superfamily
LOC111371251	260.125	-7.23343	-150.48	0.528811	-13.6787	1.36e-42	2.69e-41	XP_022848906.1	cation/H(+)_antiporter_24-like	Olive	PF00999:Sodium/hydrogen_exchanger_family	IPR001965:Zinc finger, PHD-type//IPR013083:Zinc finger, RING/FYVE/PHD-type//IPR019786:Zinc finger, PHD-type, conserved site//IPR019787:Zinc finger, PHD-finger//IPR011011:Zinc finger, FYVE/PHD-type
LOC111395252	314.178	-7.23028	-150.152	0.923256	-7.83128	4.83e-15	3.24e-14			Olive		IPR036426:Bulb-type lectin domain superfamily//IPR001480:Bulb-type lectin domain
LOC111379713	145.611	-7.21504	-148.574	0.767464	-9.40114	5.4e-21	4.9e-20	XP_022858918.1	xyloglucan_endotransglucosylase/hydrolase_protein_2-like	Olive	PF00722:Glycosyl_hydrolases_family_16//PF06955:Xyloglucan_endo-transglycosylase_(XET)_C-terminus	IPR038219:Selenoprotein F/M superfamily//IPR036249:Thioredoxin-like superfamily
LOC111412516	54.9666	-7.18495	-145.507	1.10402	-6.508	7.62e-11	3.88e-10		transmembrane_emp24_domain-containing_protein_p24delta3-like	Olive		IPR036249:Thioredoxin-like superfamily
LOC111383590	168.49	-7.17917	-144.925	0.622604	-11.5309	9.22e-31	1.25e-29	XP_022863475.1	3-ketoacyl-CoA_synthase_11-like	Olive	PF08541:3-Oxoacyl-[acyl-carrier-protein_(ACP)]_synthase_III_C_terminal//PF08392:FAE1/Type_III_polyketide_synthase-like_protein	IPR012677:Nucleotide-binding alpha-beta plait domain superfamily//IPR011990:Tetratricopeptide-like helical domain superfamily//IPR000504:RNA recognition motif domain//IPR035979:RNA-binding domain superfamily//IPR003107:HAT (Half-A-TPR) repeat
LOC111409675	138.007	-7.16808	-143.816	0.686677	-10.4388	1.65e-25	1.83e-24	XP_022895460.1	MLO-like_protein_9	Olive	PF03094:Mlo_family	IPR029058:Alpha/Beta hydrolase fold
LOC111371214	239.154	-7.15763	-142.778	0.877761	-8.15442	3.51e-16	2.51e-15	XP_022848877.1	protein_DMP2-like	Olive	PF05078:Protein_of_unknown_function_(DUF679)	IPR000315:B-box-type zinc finger
LOC111382243	344.035	-7.11147	-138.282	0.446458	-15.9286	4.01e-57	1.15e-55			Olive
LOC111365789	52.7543	-7.08576	-135.84	1.07637	-6.58305	4.61e-11	2.38e-10	XP_022842079.1	mitochondrial_import_inner_membrane_translocase_subunit_TIM17-2-like	Olive	PF02466:Tim17/Tim22/Tim23/Pmp24_family	IPR005225:Small GTP-binding protein domain//IPR027417:P-loop containing nucleoside triphosphate hydrolase
LOC111377292	51.4731	-7.0797	-135.27	1.0842	-6.52986	6.58e-11	3.37e-10	XP_022856136.1	putative_expansin-B2	Olive	PF03330:Lytic_transglycolase//PF01357:Pollen_allergen	IPR013083:Zinc finger, RING/FYVE/PHD-type//IPR001841:Zinc finger, RING-type
LOC111389665	95.234	-6.97964	-126.207	0.806432	-8.65497	4.93e-18	3.88e-17	XP_022870374.1	serine/threonine-protein_kinase_BLUS1-like,_transcript_variant_X3	Olive		IPR000571:Zinc finger, CCCH-type
LOC111382780	288.148	-6.96658	-125.069	0.453128	-15.3744	2.43e-53	6.37e-52	XP_022862585.1	putative_glutamine_amidotransferase_GAT1_2.1	Olive	PF07722:Peptidase_C26	IPR027417:P-loop containing nucleoside triphosphate hydrolase//IPR000048:IQ motif, EF-hand binding site//IPR001609:Myosin head, motor domain//IPR036961:Kinesin motor domain superfamily//IPR004009:Myosin, N-terminal, SH3-like//IPR002710:Dilute domain//IPR036018:Plant myosin, class XI, motor domain
LOC111372528	235.754	-6.94967	-123.611	0.507293	-13.6995	1.02e-42	2.03e-41	XP_022850643.1	glycosyltransferase_family_92_protein_RCOM_0530710-like	Olive	PF01697:Glycosyltransferase_family_92	IPR016024:Armadillo-type fold//IPR033712:Pumilio, RNA binding domain//IPR001313:Pumilio RNA-binding repeat//IPR033133:Pumilio homology domain//IPR011989:Armadillo-like helical
LOC111395755	261.592	-6.94828	-123.492	0.47146	-14.7378	3.69e-49	8.76e-48	XP_022877657.1	long-chain-alcohol_O-fatty-acyltransferase-like	Olive	PF13813:Membrane_bound_O-acyl_transferase_family	IPR000571:Zinc finger, CCCH-type
LOC111374844	69.1756	-6.90355	-119.723	0.885046	-7.80022	6.18e-15	4.12e-14	XP_022853356.1	UDP-glycosyltransferase_83A1-like	Olive	PF00201:UDP-glucoronosyl_and_UDP-glucosyl_transferase	IPR013083:Zinc finger, RING/FYVE/PHD-type//IPR001965:Zinc finger, PHD-type
LOC111370002	110.904	-6.84406	-114.886	0.714365	-9.58061	9.65e-22	9.1e-21	XP_022847489.1	uncharacterized_LOC111370002	Olive		IPR023318:Ubiquitin activating enzyme, alpha domain superfamily//IPR035985:Ubiquitin-activating enzyme//IPR014929:E2 binding//IPR033127:Ubiquitin-activating enzyme E1, Cys active site
LOC111375194	111.026	-6.8398	-114.547	0.688093	-9.94023	2.78e-23	2.81e-22	XP_022853764.1	beta-D-glucosyl_crocetin_beta-1,6-glucosyltransferase-like	Olive	PF00201:UDP-glucoronosyl_and_UDP-glucosyl_transferase	IPR004883:Lateral organ boundaries, LOB
LOC111400060	152.611	-6.82517	-113.392	0.585866	-11.6497	2.3e-31	3.21e-30	XP_022883284.1	BTB/POZ_domain-containing_protein_At5g03250-like	Olive	PF03000:NPH3_family//PF00651:BTB/POZ_domain	IPR011249:Metalloenzyme, LuxS/M16 peptidase-like//IPR013578:Peptidase M16C associated
LOC111370979	305.184	-6.81863	-112.879	0.437061	-15.6011	7.16e-55	1.95e-53	XP_022848677.1	type_I_inositol_polyphosphate_5-phosphatase_5-like	Olive	PF03372:Endonuclease/Exonuclease/phosphatase_family
LOC111382315	231.304	-6.76676	-108.893	0.47102	-14.3662	8.43e-47	1.88e-45	XP_022862014.1	mechanosensitive_ion_channel_protein_6-like	Olive	PF00924:Mechanosensitive_ion_channel
LOC111375880	118.426	-6.66646	-101.579	0.634286	-10.5102	7.75e-26	8.7e-25	XP_022854560.1	uncharacterized_LOC111375880	Olive		IPR017907:Zinc finger, RING-type, conserved site//IPR013083:Zinc finger, RING/FYVE/PHD-type//IPR001841:Zinc finger, RING-type//IPR002867:IBR domain
LOC111401404	214.368	-6.65674	-100.897	0.472871	-14.0773	5.24e-45	1.11e-43	XP_022884894.1	epoxide_hydrolase_4-like	Olive	PF00561:alpha/beta_hydrolase_fold	IPR012677:Nucleotide-binding alpha-beta plait domain superfamily//IPR000504:RNA recognition motif domain//IPR003954:RNA recognition motif domain, eukaryote//IPR035979:RNA-binding domain superfamily
LOC111401095	215.785	-6.65256	-100.605	0.477527	-13.9313	4.09e-44	8.43e-43	XP_022884418.1	uncharacterized_LOC111401095	Olive	PF04601:Domain_of_unknown_function_(DUF569)	IPR027417:P-loop containing nucleoside triphosphate hydrolase//IPR014001:Helicase superfamily 1/2, ATP-binding domain
LOC111410365	133.512	-6.64076	-99.7855	0.614698	-10.8033	3.32e-27	3.93e-26	XP_022896429.1	protein_JINGUBANG-like	Olive	PF00400:WD_domain,_G-beta_repeat
LOC111388611	441.065	-6.64042	-99.7624	0.345223	-19.2352	1.88e-82	8.76e-81	XP_022869135.1	clathrin_light_chain_1	Olive	PF01086:Clathrin_light_chain
LOC111365505	286.191	-6.63707	-99.5305	0.863757	-7.68396	1.54e-14	1.01e-13	XP_022841829.1	uncharacterized_LOC111365505	Olive
LOC111385858	331.724	-6.59166	-96.4464	0.407615	-16.1713	8.04e-59	2.42e-57	XP_022866054.1	uncharacterized_LOC111385858	Olive	PF02042:RWP-RK_domain
LOC111381413	330.898	-6.57704	-95.474	0.38877	-16.9176	3.34e-64	1.11e-62	XP_022860957.1	cation/H(+)_antiporter_24-like	Olive	PF00999:Sodium/hydrogen_exchanger_family
LOC111371040	185.3	-6.57077	-95.0603	0.556394	-11.8096	3.48e-32	5e-31	XP_022848729.1	probable_serine/threonine-protein_kinase_PBL26	Olive	PF00069:Protein_kinase_domain	IPR036961:Kinesin motor domain superfamily//IPR027417:P-loop containing nucleoside triphosphate hydrolase//IPR001752:Kinesin motor domain//IPR019821:Kinesin motor domain, conserved site
LOC111401681	363.014	-6.4941	-90.1403	0.385517	-16.8452	1.14e-63	3.73e-62	XP_022885306.1	pyruvate_decarboxylase_2-like,_transcript_variant_X2	Olive	PF02775:Thiamine_pyrophosphate_enzyme,_C-terminal_TPP_binding_domain//PF00205:Thiamine_pyrophosphate_enzyme,_central_domain//PF02776:Thiamine_pyrophosphate_enzyme,_N-terminal_TPP_binding_domain	IPR000048:IQ motif, EF-hand binding site//IPR014710:RmlC-like jelly roll fold//IPR003938:Potassium channel, voltage-dependent, EAG/ELK/ERG//IPR000595:Cyclic nucleotide-binding domain//IPR018490:Cyclic nucleotide-binding-like
LOC111372855	312.035	-6.49316	-90.0819	0.381803	-17.0066	7.34e-65	2.46e-63	XP_022851036.1	abscisic_acid_receptor_PYL4-like	Olive	PF10604:Polyketide_cyclase_/_dehydrase_and_lipid_transport	IPR011333:SKP1/BTB/POZ domain superfamily//IPR001232:S-phase kinase-associated protein 1-like
LOC111380122	255.991	-6.47497	-88.9527	0.438396	-14.7697	2.3e-49	5.48e-48		LIM_domain-containing_protein_PLIM2c-like	Olive		IPR004696:Triose phosphate/phosphoenolpyruvate translocator
LOC111372493	181.172	-6.41718	-85.4604	0.481605	-13.3246	1.67e-40	3.08e-39	XP_022850611.1	zinc_finger_protein_ZAT5-like	Olive	PF13912:C2H2-type_zinc_finger	IPR017930:Myb domain//IPR001005:SANT/Myb domain//IPR009057:Homeobox-like domain superfamily//IPR006447:Myb domain, plants//IPR017884:SANT domain
LOC111380442	148.925	-6.41474	-85.3156	0.530302	-12.0964	1.1e-33	1.66e-32	XP_022859777.1	uridine_kinase-like_protein_5	Olive	PF14681:Uracil_phosphoribosyltransferase
LOC111389838	261.652	-6.40402	-84.6843	0.437099	-14.6512	1.32e-48	3.1e-47		uncharacterized_LOC111389838	Olive		IPR014977:WRC domain
LOC111407705	126.161	-6.34978	-81.5595	0.593462	-10.6996	1.02e-26	1.19e-25	XP_022893112.1	putative_respiratory_burst_oxidase_homolog_protein_H	Olive	PF01794:Ferric_reductase_like_transmembrane_component//PF08414:Respiratory_burst_NADPH_oxidase//PF08030:Ferric_reductase_NAD_binding_domain//PF08022:FAD-binding_domain	IPR034088:Pla a 1-like//IPR006501:Pectinesterase inhibitor domain//IPR035513:Invertase/pectin methylesterase inhibitor domain superfamily
LOC111367290	78.0636	-6.3436	-81.2108	0.722041	-8.78564	1.55e-18	1.26e-17	XP_022843857.1	transcription_factor_bHLH87,_transcript_variant_X2	Olive	PF00010:Helix-loop-helix_DNA-binding_domain
LOC111378225	261.794	-6.32488	-80.1637	0.394219	-16.0441	6.29e-58	1.85e-56	XP_022857162.1	cysteine-rich_repeat_secretory_protein_12-like	Olive	PF01657:Salt_stress_response/antifungal	IPR019734:Tetratricopeptide repeat//IPR011990:Tetratricopeptide-like helical domain superfamily//IPR013026:Tetratricopeptide repeat-containing domain
LOC111403421	91.4208	-6.30498	-79.0656	0.647486	-9.73763	2.08e-22	2.03e-21	XP_022887691.1	1-acyl-sn-glycerol-3-phosphate_acyltransferase_2-like	Olive	PF16076:Acyltransferase_C-terminus//PF01553:Acyltransferase	IPR043153:DENN domain, C-terminal lobe//IPR001194:cDENN domain//IPR037516:Tripartite DENN domain
LOC111394906	212.879	-6.29793	-78.6803	0.544904	-11.5579	6.74e-31	9.19e-30	XP_022876724.1	V-type_proton_ATPase_subunit_G-like,_transcript_variant_X2	Olive	PF03179:Vacuolar_(H+)-ATPase_G_subunit	IPR004827:Basic-leucine zipper domain
LOC111370251	241.547	-6.27544	-77.4632	0.432585	-14.5068	1.1e-47	2.51e-46	XP_022847702.1	uncharacterized_LOC111370251	Olive		IPR029044:Nucleotide-diphospho-sugar transferases
LOC111404845	88.5735	-6.27364	-77.3667	0.656364	-9.55817	1.2e-21	1.12e-20	XP_022889350.1	protein_LURP-one-related_8-like	Olive	PF04525:LURP-one-related	IPR003441:NAC domain//IPR036093:NAC domain superfamily
LOC111392832	207.039	-6.25882	-76.576	0.453813	-13.7916	2.86e-43	5.77e-42	XP_022873993.1	rop_guanine_nucleotide_exchange_factor_9-like	Olive	PF03759:PRONE_(Plant-specific_Rop_nucleotide_exchanger)	IPR013083:Zinc finger, RING/FYVE/PHD-type//IPR001841:Zinc finger, RING-type//IPR017907:Zinc finger, RING-type, conserved site//IPR002867:IBR domain
LOC111391844	87.9263	-6.25221	-76.2259	0.656757	-9.51982	1.73e-21	1.61e-20	XP_022872885.1	ADP-ribosylation_factor_1-like	Olive	PF00025:ADP-ribosylation_factor_family
LOC111399437	116.929	-6.24533	-75.8635	0.563792	-11.0774	1.62e-28	2.03e-27		uncharacterized_LOC111399437	Olive		IPR025799:Protein arginine N-methyltransferase//IPR036236:Zinc finger C2H2 superfamily//IPR029063:S-adenosyl-L-methionine-dependent methyltransferase
LOC111380684	102.211	-6.22307	-74.7017	0.60856	-10.2259	1.52e-24	1.62e-23		uncharacterized_LOC111380684,_transcript_variant_X4	Olive		IPR006121:Heavy metal-associated domain, HMA//IPR036163:Heavy metal-associated domain superfamily
LOC111408921	72.0471	-6.21393	-74.2298	0.739498	-8.4029	4.36e-17	3.28e-16	XP_022894536.1	cytokinin_dehydrogenase_5	Olive	PF09265:Cytokinin_dehydrogenase_1,_FAD_and_cytokinin_binding//PF01565:FAD_binding_domain	IPR017930:Myb domain//IPR001005:SANT/Myb domain//IPR009057:Homeobox-like domain superfamily//IPR005818:Linker histone H1/H5, domain H15//IPR036390:Winged helix DNA-binding domain superfamily//IPR036388:Winged helix-like DNA-binding domain superfamily
LOC111408260	137.624	-6.1675	-71.8793	0.548015	-11.2543	2.21e-29	2.86e-28	XP_022893812.1	calcium_uptake_protein,_mitochondrial-like	Olive	PF13833:EF-hand_domain_pair	IPR000704:Casein kinase II, regulatory subunit//IPR016149:Casein kinase II, regulatory subunit, N-terminal//IPR035991:Casein kinase II subunit beta-like
LOC111387557	52.1601	-6.11563	-69.3405	0.85085	-7.18766	6.59e-13	3.87e-12			Olive
LOC111411033	52.8325	-6.08674	-67.9659	0.810998	-7.50524	6.13e-14	3.83e-13	XP_022897377.1	uncharacterized_LOC111411033,_transcript_variant_X2	Olive	PF06136:Domain_of_unknown_function_(DUF966)
LOC111388466	63.967	-6.05046	-66.2781	0.723249	-8.36566	5.98e-17	4.47e-16		protein_indeterminate-domain_16-like	Olive		IPR002885:Pentatricopeptide repeat//IPR011990:Tetratricopeptide-like helical domain superfamily
LOC111404112	143.924	-5.95678	-62.111	0.474683	-12.5489	4.03e-36	6.53e-35	XP_022888621.1	uncharacterized_LOC111404112	Olive		IPR001841:Zinc finger, RING-type//IPR013083:Zinc finger, RING/FYVE/PHD-type
LOC111408738	107.57	-5.95117	-61.87	1.19868	-4.96475	6.88e-07	2.46e-06	XP_022894269.1	putative_glutamine_amidotransferase_GAT1_2.1	Olive	PF07722:Peptidase_C26	IPR006564:Zinc finger, PMZ-type//IPR007527:Zinc finger, SWIM-type
LOC111374146	119.337	-5.91703	-60.423	0.528372	-11.1986	4.14e-29	5.31e-28		probable_methyltransferase_PMT15	Olive		IPR004182:GRAM domain//IPR011993:PH-like domain superfamily//IPR031968:VASt domain
LOC111406910	174.369	-5.90979	-60.1207	0.451444	-13.0909	3.71e-39	6.59e-38	XP_022892040.1	uncharacterized_LOC111406910	Olive	PF05910:Plant_protein_of_unknown_function_(DUF868)	IPR020084:NUDIX hydrolase, conserved site//IPR015797:NUDIX hydrolase-like domain superfamily//IPR000086:NUDIX hydrolase domain
LOC111375746	225.608	-5.87933	-58.8648	0.427561	-13.7509	5.03e-43	1.01e-41	XP_022854381.1	uncharacterized_LOC111375746	Olive		IPR006501:Pectinesterase inhibitor domain//IPR035513:Invertase/pectin methylesterase inhibitor domain superfamily
LOC111370883	124.309	-5.86476	-58.273	0.534243	-10.9777	4.89e-28	6.04e-27	XP_022848552.1	eukaryotic_translation_initiation_factor_4E-1-like	Olive	PF01652:Eukaryotic_initiation_factor_4E	IPR012946:X8 domain
LOC111406201	175.791	-5.82854	-56.8284	0.415735	-14.0199	1.18e-44	2.46e-43	XP_022891243.1	cell_division_cycle_20.3,_cofactor_of_APC_complex-like,_transcript_variant_X2	Olive	PF00400:WD_domain,_G-beta_repeat
LOC111412681	156.018	-5.82774	-56.7968	0.502748	-11.5918	4.54e-31	6.23e-30	XP_022899373.1	secoisolariciresinol_dehydrogenase-like	Olive	PF13561:Enoyl-(Acyl_carrier_protein)_reductase	IPR004136:Nitronate monooxygenase//IPR013785:Aldolase-type TIM barrel
LOC111390650	264.192	-5.81454	-56.2798	0.361225	-16.0967	2.69e-58	8e-57	XP_022871484.1	probable_alkaline/neutral_invertase_F	Olive	PF12899:Alkaline_and_neutral_invertase	IPR006628:Purine-rich element binding protein family
LOC111379092	64.0263	-5.75897	-54.153	0.664979	-8.66038	4.7e-18	3.71e-17	XP_022858191.1	plant_cysteine_oxidase_2-like,_transcript_variant_X4	Olive	PF07847:PCO_ADO	IPR014014:RNA helicase, DEAD-box type, Q motif//IPR014001:Helicase superfamily 1/2, ATP-binding domain//IPR027417:P-loop containing nucleoside triphosphate hydrolase//IPR001650:Helicase, C-terminal//IPR000629:ATP-dependent RNA helicase DEAD-box, conserved site
LOC111408444	93.3725	-5.73284	-53.1812	0.545498	-10.5094	7.82e-26	8.76e-25	XP_022893973.1	uncharacterized_LOC111408444	Olive		IPR008963:Purple acid phosphatase-like, N-terminal//IPR029052:Metallo-dependent phosphatase-like//IPR041792:Purple acid phosphatase, metallophosphatase domain
LOC111378561	72.4421	-5.72696	-52.9649	0.630422	-9.08434	1.04e-19	8.95e-19			Olive
LOC111392725	60.3421	-5.69336	-51.7453	0.718428	-7.92474	2.29e-15	1.56e-14		perakine_reductase-like	Olive		IPR012337:Ribonuclease H-like superfamily
LOC111379322	75.1357	-5.58764	-48.0891	0.590394	-9.46426	2.96e-21	2.72e-20	XP_022858446.1	metal_transporter_Nramp2-like	Olive	PF01566:Natural_resistance-associated_macrophage_protein
LOC111393172	146.383	-5.5737	-47.6266	0.446873	-12.4727	1.05e-35	1.68e-34	XP_022874337.1	IQ_domain-containing_protein_IQM2-like	Olive
LOC111389474	65.5852	-5.57022	-47.512	1.60104	-3.47913	0.000503052	0.00123644	XP_022870159.1	uncharacterized_LOC111389474	Olive	PF00249:Myb-like_DNA-binding_domain	IPR001680:WD40 repeat//IPR019775:WD40 repeat, conserved site//IPR020472:G-protein beta WD-40 repeat//IPR036322:WD40-repeat-containing domain superfamily//IPR017986:WD40-repeat-containing domain//IPR015943:WD40/YVTN repeat-like-containing domain superfamily
LOC111385050	175.737	-5.49546	-45.1126	0.379093	-14.4963	1.28e-47	2.92e-46		uncharacterized_LOC111385050	Olive		IPR001841:Zinc finger, RING-type//IPR013083:Zinc finger, RING/FYVE/PHD-type
LOC111406988	199.374	-5.47981	-44.6259	0.396655	-13.815	2.07e-43	4.18e-42			Olive		IPR013083:Zinc finger, RING/FYVE/PHD-type//IPR001841:Zinc finger, RING-type//IPR011016:Zinc finger, RING-CH-type
LOC111399471	149.727	-5.47721	-44.5455	0.452385	-12.1074	9.65e-34	1.45e-32	XP_022882548.1	serine/threonine-protein_kinase_CBK1-like	Olive	PF00069:Protein_kinase_domain	IPR000571:Zinc finger, CCCH-type
LOC111374285	163.344	-5.46709	-44.2341	0.398817	-13.7083	9.06e-43	1.8e-41	XP_022852710.1	probable_trehalose-phosphate_phosphatase_F,_transcript_variant_X2	Olive	PF02358:Trehalose-phosphatase	IPR027534:Ribosomal protein L12 family
LOC111388747	154.257	-5.4606	-44.0358	0.400326	-13.6404	2.3e-42	4.53e-41	XP_022869301.1	uncharacterized_LOC111388747	Olive		IPR038765:Papain-like cysteine peptidase superfamily//IPR028889:Ubiquitin specific protease domain//IPR018200:Ubiquitin specific protease, conserved site
LOC111402164	58.2774	-5.40895	-42.4871	0.631145	-8.57007	1.03e-17	8.06e-17			Olive
LOC111388922	90.9961	-5.39393	-42.0471	0.50744	-10.6297	2.17e-26	2.49e-25	XP_022869519.1	uncharacterized_LOC111388922	Olive	PF04632:Fusaric_acid_resistance_protein_family
LOC111378512	90.8832	-5.39086	-41.9575	0.509813	-10.5742	3.93e-26	4.46e-25	XP_022857494.1	calcium-binding_protein_PBP1-like	Olive	PF13833:EF-hand_domain_pair
LOC111380076	92.944	-5.38343	-41.742	1.78374	-3.01806	0.00254399	0.00557228	XP_022859308.1	guanine_nucleotide-binding_protein_alpha-1_subunit-like	Olive	PF00503:G-protein_alpha_subunit	IPR001841:Zinc finger, RING-type//IPR017907:Zinc finger, RING-type, conserved site//IPR013083:Zinc finger, RING/FYVE/PHD-type
LOC111412200	158.742	-5.34584	-40.6685	0.417412	-12.8071	1.5e-37	2.51e-36	XP_022898780.1	ABC_transporter_B_family_member_9-like	Olive	PF00005:ABC_transporter//PF00664:ABC_transporter_transmembrane_region
LOC111404874	62.1077	-5.31491	-39.8059	0.604639	-8.79022	1.49e-18	1.21e-17	XP_022889374.1	transcription_repressor_OFP1-like	Olive	PF13724:DNA-binding_domain//PF04844:Transcriptional_repressor,_ovate	IPR040097:Fatty acyl-AMP ligase//IPR042099:AMP-dependent synthetase-like superfamily
LOC111392872	78.2494	-5.30653	-39.5754	0.542587	-9.78007	1.37e-22	1.35e-21	XP_022874040.1	mediator_of_RNA_polymerase_II_transcription_subunit_15a-like	Olive		IPR008991:Translation protein SH3-like domain superfamily//IPR014722:Ribosomal protein L2, domain 2//IPR041985:Ribosomal protein L14, KOW motif
LOC111400587	161.75	-5.30605	-39.5621	0.397811	-13.3381	1.39e-40	2.58e-39	XP_022883762.1	probable_acyl-activating_enzyme_1,_peroxisomal	Olive	PF00501:AMP-binding_enzyme//PF13193:AMP-binding_enzyme_C-terminal_domain
LOC111407064	106.96	-5.29442	-39.2446	0.458547	-11.5461	7.73e-31	1.05e-29	XP_022892165.1	transcription_factor_IBH1	Olive		IPR018181:Heat shock protein 70, conserved site//IPR043129:ATPase, nucleotide binding domain
LOC111372096	61.5131	-5.29415	-39.2371	0.597402	-8.86195	7.86e-19	6.45e-18		uncharacterized_LOC111372096	Olive
LOC111408194	105.762	-5.28124	-38.8876	0.478223	-11.0435	2.36e-28	2.95e-27			Olive		IPR036047:F-box-like domain superfamily//IPR011050:Pectin lyase fold/virulence factor
LOC111381330	60.7976	-5.27604	-38.7477	0.61043	-8.64315	5.47e-18	4.3e-17	XP_022860882.1	protein_IQ-DOMAIN_1-like,_transcript_variant_X3	Olive	PF13178:Protein_of_unknown_function_(DUF4005)
LOC111386367	142.74	-5.26975	-38.579	0.409822	-12.8586	7.69e-38	1.31e-36		calcium-dependent_protein_kinase_34-like	Olive		IPR002885:Pentatricopeptide repeat//IPR011990:Tetratricopeptide-like helical domain superfamily
LOC111396797	89.1036	-5.23934	-37.7745	0.512975	-10.2136	1.72e-24	1.83e-23	XP_022879085.1	stearoyl-[acyl-carrier-protein]_9-desaturase_6,_chloroplastic-like	Olive	PF03405:Fatty_acid_desaturase	IPR017865:F-actin capping protein, alpha subunit, conserved site//IPR042489:F-actin capping protein, alpha subunit, domain 1//IPR042276:F-actin-capping protein subunit alpha/beta, domain 2//IPR037282:F-actin-capping protein subunit alpha/beta//IPR002189:F-actin-capping protein subunit alpha
LOC111411382	78.9228	-5.21305	-37.0924	0.526362	-9.90392	4e-23	4.02e-22	XP_022897685.1	zinc_finger_protein_WIP2-like	Olive	PF13912:C2H2-type_zinc_finger	IPR017392:AP2/ERF transcription factor ERF/PTI6//IPR001471:AP2/ERF domain//IPR016177:DNA-binding domain superfamily//IPR036955:AP2/ERF domain superfamily
LOC111392776	80.1518	-5.21177	-37.0595	0.515313	-10.1138	4.8e-24	5e-23	XP_022873940.1	ribonuclease_S-2-like	Olive	PF00445:Ribonuclease_T2_family	IPR018104:Translation initiation factor 1A (eIF-1A), conserved site//IPR001253:Translation initiation factor 1A (eIF-1A)//IPR012340:Nucleic acid-binding, OB-fold//IPR006196:RNA-binding domain, S1, IF1 type
LOC111388145	104.437	-5.13539	-35.1486	0.448209	-11.4576	2.15e-30	2.88e-29	XP_022868591.1	uncharacterized_LOC111388145	Olive
LOC111377825	134.761	-5.12453	-34.8848	0.448739	-11.4198	3.33e-30	4.43e-29	XP_022856721.1	uncharacterized_LOC111377825	Olive	PF02485:Core-2/I-Branching_enzyme	IPR014710:RmlC-like jelly roll fold//IPR000595:Cyclic nucleotide-binding domain//IPR029069:HotDog domain superfamily//IPR018490:Cyclic nucleotide-binding-like//IPR042171:Acyl-CoA thioesterase, double hotdog domain
LOC111370451	102.214	-5.10725	-34.4695	0.468137	-10.9097	1.04e-27	1.26e-26	XP_022847931.1	probable_phospholipid-transporting_ATPase_5	Olive	PF16209:Phospholipid-translocating_ATPase_N-terminal//PF13246:Cation_transport_ATPase_(P-type)//PF16212:Phospholipid-translocating_P-type_ATPase_C-terminal	IPR002885:Pentatricopeptide repeat//IPR011990:Tetratricopeptide-like helical domain superfamily
LOC111389550	146.206	-5.07735	-33.7626	0.384384	-13.2091	7.78e-40	1.41e-38	XP_022870246.1	uncharacterized_LOC111389550	Olive	PF13664:Domain_of_unknown_function_(DUF4149)	IPR018368:ClpA/B, conserved site 1//IPR003593:AAA+ ATPase domain//IPR027417:P-loop containing nucleoside triphosphate hydrolase//IPR036628:Clp, N-terminal domain superfamily
LOC111380018	146.931	-5.0699	-33.5887	0.394419	-12.8541	8.16e-38	1.39e-36	XP_022859246.1	polyadenylate-binding_protein_7-like	Olive	PF00076:RNA_recognition_motif._(a.k.a._RRM,_RBD,_or_RNP_domain)
LOC111408771	65.6503	-5.05695	-33.2885	0.556567	-9.08598	1.03e-19	8.82e-19	XP_022894311.1	polyadenylate-binding_protein_5-like	Olive	PF00076:RNA_recognition_motif._(a.k.a._RRM,_RBD,_or_RNP_domain)//PF00658:Poly-adenylate_binding_protein,_unique_domain
LOC111403851	50.6608	-5.02528	-32.5657	0.620021	-8.10501	5.27e-16	3.73e-15	XP_022888252.1	FT-interacting_protein_1-like,_transcript_variant_X2	Olive	PF08372:Plant_phosphoribosyltransferase_C-terminal//PF00168:C2_domain	IPR015421:Pyridoxal phosphate-dependent transferase, major domain//IPR015422:Pyridoxal phosphate-dependent transferase domain 1//IPR015424:Pyridoxal phosphate-dependent transferase//IPR005958:Tyrosine/nicotianamine aminotransferase
LOC111380840	107.774	-5.01025	-32.2282	0.427519	-11.7194	1.01e-31	1.43e-30		E3_ubiquitin-protein_ligase_MIEL1-like	Olive
LOC111376103	115.127	-4.89212	-29.6945	0.93683	-5.222	1.77e-07	6.72e-07	XP_022854799.1	alcohol-forming_fatty_acyl-CoA_reductase-like	Olive	PF07993:Male_sterility_protein	IPR029058:Alpha/Beta hydrolase fold
LOC111401085	74.513	-4.87184	-29.28	0.525569	-9.26965	1.87e-20	1.65e-19	XP_022884397.1	sodium/hydrogen_exchanger_1-like	Olive	PF00999:Sodium/hydrogen_exchanger_family
LOC111402224	112.007	-4.82745	-28.3927	0.404086	-11.9466	6.76e-33	9.95e-32	XP_022886157.1	uncharacterized_LOC111402224	Olive		IPR036740:tRNA intron endonuclease, N-terminal domain superfamily
LOC111402646	99.5883	-4.7848	-27.5656	0.425219	-11.2526	2.25e-29	2.92e-28	XP_022886787.1	auxin-responsive_protein_SAUR50-like	Olive	PF02519:Auxin_responsive_protein
LOC111374477	67.0543	-4.73252	-26.5845	1.0938	-4.32667	1.51e-05	4.59e-05		uridine_kinase-like_protein_5	Olive
LOC111391226	62.4139	-4.73139	-26.5637	0.536777	-8.81443	1.2e-18	9.79e-18		uncharacterized_LOC111391226	Olive		IPR043502:DNA/RNA polymerase superfamily
LOC111385843	57.6127	-4.7262	-26.4684	0.539287	-8.76379	1.89e-18	1.52e-17		putative_clathrin_assembly_protein_At5g57200	Olive		IPR011009:Protein kinase-like domain superfamily
LOC111399868	50.5049	-4.70357	-26.0565	0.592299	-7.94121	2e-15	1.37e-14	XP_022883125.1	uncharacterized_LOC111399868	Olive		IPR001303:Class II aldolase/adducin N-terminal//IPR017714:Methylthioribulose-1-phosphate dehydratase//IPR027514:Methylthioribulose-1-phosphate dehydratase, eukaryotes//IPR036409:Class II aldolase/adducin N-terminal domain superfamily//IPR036412:HAD-like superfamily
LOC111365791	65.0999	-4.67718	-25.5842	0.510964	-9.15365	5.5e-20	4.78e-19	XP_022842081.1	ethylene-responsive_transcription_factor_WIN1-like	Olive	PF00847:AP2_domain	IPR001246:Lipoxygenase, plant//IPR013819:Lipoxygenase, C-terminal//IPR020834:Lipoxygenase, conserved site//IPR036226:Lipoxigenase, C-terminal domain superfamily//IPR027433:Lipoxygenase, domain 3
LOC111410697	114.62	-4.65116	-25.1269	0.396367	-11.7345	8.48e-32	1.2e-30	XP_022896938.1	monoacylglycerol_lipase_ABHD6-like,_transcript_variant_X3	Olive	PF00561:alpha/beta_hydrolase_fold	IPR008271:Serine/threonine-protein kinase, active site//IPR011009:Protein kinase-like domain superfamily//IPR000719:Protein kinase domain
LOC111376095	74.4262	-4.64944	-25.0969	0.477264	-9.74185	2e-22	1.95e-21	XP_022854794.1	zinc_finger_protein_ZAT5-like	Olive	PF13912:C2H2-type_zinc_finger	IPR016084:Haem oxygenase-like, multi-helical
LOC111374096	53.1396	-4.62887	-24.7417	0.631058	-7.33511	2.22e-13	1.34e-12	XP_022852497.1	LRR_receptor-like_serine/threonine-protein_kinase_GSO1	Olive	PF08263:Leucine_rich_repeat_N-terminal_domain//PF00069:Protein_kinase_domain//PF13855:Leucine_rich_repeat//PF00560:Leucine_Rich_Repeat	IPR000197:Zinc finger, TAZ-type//IPR035898:TAZ domain superfamily//IPR011333:SKP1/BTB/POZ domain superfamily//IPR000210:BTB/POZ domain
LOC111375691	56.6149	-4.60065	-24.2624	0.547232	-8.40712	4.2e-17	3.17e-16	XP_022854327.1	protein_SENESCENCE-ASSOCIATED_GENE_21,_mitochondrial-like	Olive	PF03242:Late_embryogenesis_abundant_protein
LOC111390990	83.0324	-4.56487	-23.6681	0.456878	-9.99146	1.66e-23	1.7e-22	XP_022871894.1	cysteine-rich_and_transmembrane_domain-containing_protein_WIH1-like,_transcript_variant_X2	Olive	PF12734:Cysteine-rich_TM_module_stress_tolerance	IPR006751:TAFII55 protein, conserved region
LOC111386702	88.0841	-4.55651	-23.5313	0.431947	-10.5488	5.15e-26	5.82e-25	XP_022866935.1	zinc_finger_protein_ZAT5-like	Olive	PF13912:C2H2-type_zinc_finger	IPR011032:GroES-like superfamily//IPR002328:Alcohol dehydrogenase, zinc-type, conserved site//IPR036291:NAD(P)-binding domain superfamily//IPR020843:Polyketide synthase, enoylreductase domain
LOC111402396	91.7551	-4.45442	-21.9237	0.419401	-10.6209	2.38e-26	2.73e-25	XP_022886428.1	subtilisin-like_protease_SBT5.4	Olive	PF17766:Fibronectin_type-III_domain//PF00082:Subtilase_family//PF02225:PA_domain//PF05922:Peptidase_inhibitor_I9	IPR001005:SANT/Myb domain//IPR017930:Myb domain//IPR009057:Homeobox-like domain superfamily
LOC111400269	57.195	-4.41251	-21.296	0.594306	-7.42464	1.13e-13	6.95e-13	XP_022883456.1	uncharacterized_LOC111400269	Olive	PF05212:Protein_of_unknown_function_(DUF707)	IPR036430:Ribonuclease T2-like superfamily//IPR033697:Ribonuclease T2, eukaryotic//IPR018188:Ribonuclease T2, His active site 1
LOC111397104	62.6705	-4.40261	-21.1503	0.498149	-8.83793	9.75e-19	7.96e-18	XP_022879612.1	uncharacterized_LOC111397104,_transcript_variant_X2	Olive	PF04765:Protein_of_unknown_function_(DUF616)	IPR036378:FAS1 domain superfamily//IPR000782:FAS1 domain
LOC111402679	82.9437	-4.31285	-19.8745	0.420194	-10.264	1.02e-24	1.1e-23	XP_022886809.1	uncharacterized_LOC111402679,_transcript_variant_X2	Olive		IPR029149:Creatinase/Aminopeptidase P/Spt16, N-terminal//IPR036005:Creatinase/aminopeptidase-like
LOC111381789	54.2018	-4.27332	-19.3374	0.518123	-8.2477	1.61e-16	1.18e-15	XP_022861384.1	S-protein_homolog_29-like	Olive	PF05938:Plant_self-incompatibility_protein_S1	IPR027417:P-loop containing nucleoside triphosphate hydrolase//IPR005225:Small GTP-binding protein domain
LOC111391653	92.313	-4.26104	-19.1735	0.395367	-10.7774	4.4e-27	5.19e-26	XP_022872674.1	putative_invertase_inhibitor	Olive	PF04043:Plant_invertase/pectin_methylesterase_inhibitor
LOC111405085	70.78	-4.25386	-19.0782	1.17658	-3.61545	0.000299825	0.000763144	XP_022889570.1	nuclear_poly(A)_polymerase_4-like,_transcript_variant_X6	Olive	PF04926:Poly(A)_polymerase_predicted_RNA_binding_domain//PF01909:Nucleotidyltransferase_domain//PF04928:Poly(A)_polymerase_central_domain	IPR036881:Glycoside hydrolase family 3 C-terminal domain superfamily//IPR001764:Glycoside hydrolase, family 3, N-terminal//IPR017853:Glycoside hydrolase superfamily//IPR019800:Glycoside hydrolase, family 3, active site//IPR036962:Glycoside hydrolase, family 3, N-terminal domain superfamily
LOC111385846	66.0925	-4.04858	-16.548	0.468515	-8.64131	5.56e-18	4.36e-17			Olive
LOC111402339	57.4951	-4.02969	-16.3327	0.483644	-8.33194	7.95e-17	5.89e-16			Olive
LOC111386638	50.6367	-3.93513	-15.2965	0.502761	-7.82703	5e-15	3.34e-14	XP_022866872.1	gamma-glutamyl_peptidase_5-like	Olive		IPR001480:Bulb-type lectin domain//IPR036426:Bulb-type lectin domain superfamily
LOC111371872	52.9002	-3.92961	-15.2381	0.487583	-8.05936	7.67e-16	5.38e-15	XP_022849798.1	uncharacterized_LOC111371872	Olive		IPR002401:Cytochrome P450, E-class, group I//IPR036396:Cytochrome P450 superfamily//IPR001128:Cytochrome P450//IPR017972:Cytochrome P450, conserved site
LOC111381104	50.1298	-3.82659	-14.1879	0.500176	-7.65048	2e-14	1.3e-13	XP_022860595.1	uncharacterized_LOC111381104,_transcript_variant_X2	Olive		IPR006828:Association with the SNF1 complex (ASC) domain//IPR013783:Immunoglobulin-like fold//IPR014756:Immunoglobulin E-set//IPR037256:ASC domain superfamily
LOC111398540	59.2751	-3.69318	-12.9347	0.443449	-8.3283	8.2e-17	6.07e-16	XP_022881264.1	cytochrome_P450_87A3,_transcript_variant_X2	Olive	PF00067:Cytochrome_P450
LOC111370065	51.6409	-3.36174	-10.2798	0.44272	-7.59337	3.12e-14	1.99e-13	XP_022847543.1	sodium/calcium_exchanger_NCL1-like	Olive	PF13499:EF-hand_domain_pair//PF14223:gag-polypeptide_of_LTR_copia-type

## Sheet: DE_Specific_P14
Genes	baseMean	log2FoldChange	FoldChange	lfcSE	stat	pvalue	padj	Gene_ID	description	Organism	pfam	Interpro
LOC111408989	587.774	-8.09349	-273.14	0.506539	-15.978	1.81795e-57	6.36871e-55	XP_022894638.1	probable_xyloglucan_endotransglucosylase/hydrolase_protein_7	Olive	PF06955:Xyloglucan_endo-transglycosylase_(XET)_C-terminus//PF00722:Glycosyl_hydrolases_family_16	IPR000757:Glycoside hydrolase family 16//IPR016455:Xyloglucan endotransglucosylase/hydrolase//IPR008263:Glycoside hydrolase, family 16, active site//IPR013320:Concanavalin A-like lectin/glucanase domain superfamily
LOC111377327	223.941	-7.05415	-132.896	0.588164	-11.9935	3.84212e-33	4.66478e-31	XP_022856174.1	BURP_domain-containing_protein_16-like	Olive	PF03181:BURP_domain	IPR004873:BURP domain
LOC111394967	298.224	-6.82979	-113.756	0.927753	-7.36165	1.81647e-13	5.36345e-12	XP_022876772.1	rapid_alkalinization_factor-like	Olive	PF05498:Rapid_ALkalinization_Factor_(RALF)
LOC111380288	165.805	-6.62035	-98.384	0.590008	-11.2208	3.2237e-29	3.17007e-27	XP_022859582.1	uncharacterized_LOC111380288	Olive
LOC111383563	84.1204	-6.44529	-87.1414	0.779447	-8.26905	1.3503e-16	5.14875e-15	XP_022863446.1	anthocyanidin_3-O-glucosyltransferase_5-like	Olive	PF00201:UDP-glucoronosyl_and_UDP-glucosyl_transferase	IPR035595:UDP-glycosyltransferase family, conserved site
LOC111404076	219.885	-6.24582	-75.8892	0.466293	-13.3946	6.49855e-41	1.23476e-38	XP_022888574.1	laccase-7-like	Olive	PF07731:Multicopper_oxidase//PF00394:Multicopper_oxidase//PF07732:Multicopper_oxidase	IPR034289:Laccase, third cupredoxin domain//IPR034285:Laccase, second cupredoxin domain//IPR033138:Multicopper oxidases, conserved site//IPR034288:Laccase, first cupredoxin domain//IPR008972:Cupredoxin//IPR017761:Laccase//IPR002355:Multicopper oxidase, copper-binding site
LOC111411989	186.468	-6.1328	-70.171	0.488845	-12.5455	4.20753e-36	6.02143e-34	XP_022898473.1	uncharacterized_LOC111411989	Olive	PF04450:Peptidase_of_plants_and_bacteria
LOC111399703	82.7516	-6.09597	-68.402	0.71027	-8.5826	9.27506e-18	3.84623e-16	XP_022882931.1	subtilisin-like_protease_SBT4.15	Olive	PF05922:Peptidase_inhibitor_I9//PF00082:Subtilase_family//PF17766:Fibronectin_type-III_domain	IPR036852:Peptidase S8/S53 domain superfamily//IPR015500:Peptidase S8, subtilisin-related//IPR034197:Cucumisin-like catalytic domain//IPR023828:Peptidase S8, subtilisin, Ser-active site//IPR037045:Peptidase S8 propeptide/proteinase inhibitor I9 superfamily
LOC111407314	57.6452	-5.89487	-59.5022	0.798212	-7.38509	1.52349e-13	4.5262e-12	XP_022892495.1	probable_WRKY_transcription_factor_35	Olive	PF03106:WRKY_DNA_-binding_domain	IPR003657:WRKY domain//IPR036576:WRKY domain superfamily
LOC111380888	85.2129	-5.87206	-58.5688	0.65938	-8.90543	5.31803e-19	2.42017e-17	XP_022860316.1	receptor-like_protein_12,_transcript_variant_X2	Olive	PF08263:Leucine_rich_repeat_N-terminal_domain//PF00560:Leucine_Rich_Repeat//PF13855:Leucine_rich_repeat	IPR001611:Leucine-rich repeat//IPR003591:Leucine-rich repeat, typical subtype//IPR032675:Leucine-rich repeat domain superfamily
LOC111397229	70.0783	-5.85605	-57.9226	0.720799	-8.12439	4.49618e-16	1.64181e-14	XP_022879818.1	probable_xyloglucan_endotransglucosylase/hydrolase_protein_7	Olive	PF06955:Xyloglucan_endo-transglycosylase_(XET)_C-terminus//PF00722:Glycosyl_hydrolases_family_16	IPR008263:Glycoside hydrolase, family 16, active site//IPR016455:Xyloglucan endotransglucosylase/hydrolase//IPR000757:Glycoside hydrolase family 16//IPR013320:Concanavalin A-like lectin/glucanase domain superfamily
LOC111388333	80.3851	-5.78672	-55.2048	0.662016	-8.74106	2.3093e-18	1.00212e-16	XP_022868784.1	transmembrane_protein_45B-like	Olive	PF04819:Family_of_unknown_function_(DUF716)
LOC111390983	130.399	-5.74253	-53.5394	0.532175	-10.7907	3.81009e-27	3.28556e-25	XP_022871882.1	collagen_alpha-2(IV)_chain-like	Olive
LOC111397047	89.3446	-5.71345	-52.471	0.62006	-9.21434	3.13185e-20	1.56737e-18	XP_022879532.1	MADS-box_protein_SOC1-like,_transcript_variant_X4	Olive	PF00319:SRF-type_transcription_factor_(DNA-binding_and_dimerisation_domain)//PF01486:K-box_region	IPR036879:Transcription factor, MADS-box superfamily//IPR002100:Transcription factor, MADS-box//IPR002487:Transcription factor, K-box//IPR033896:MADS MEF2-like
LOC111371132	196.069	-5.65564	-50.4101	0.417806	-13.5365	9.52125e-42	1.91742e-39	XP_022848808.1	uncharacterized_LOC111371132	Olive
LOC111399011	153.356	-5.60064	-48.5245	0.470966	-11.8918	1.30518e-32	1.54016e-30	XP_022881974.1	aspartic_proteinase_CDR1-like	Olive	PF14541:Xylanase_inhibitor_C-terminal//PF14543:Xylanase_inhibitor_N-terminal	IPR021109:Aspartic peptidase domain superfamily//IPR034161:Pepsin-like domain, plant//IPR033121:Peptidase family A1 domain
LOC111391732	101.603	-5.53502	-46.3669	0.569417	-9.72052	2.46529e-22	1.44443e-20	XP_022872751.1	cation/H(+)_antiporter_20-like	Olive	PF00999:Sodium/hydrogen_exchanger_family	IPR038770:Sodium/solute symporter superfamily
LOC111406760	54.3259	-5.47809	-44.5728	0.742975	-7.37318	1.66603e-13	4.93223e-12	XP_022891905.1	uncharacterized_LOC111406760	Olive	PF13650:Aspartyl_protease	IPR001969:Aspartic peptidase, active site//IPR021109:Aspartic peptidase domain superfamily
LOC111378770	86.5389	-5.47451	-44.4623	0.590355	-9.27325	1.80566e-20	9.1593e-19	XP_022857775.1	UPF0481_protein_At3g47200-like	Olive	PF03140:Plant_protein_of_unknown_function
LOC111381100	136.878	-5.42771	-43.0432	0.477764	-11.3607	6.56504e-30	6.71091e-28		cysteine-rich_receptor-like_protein_kinase_25	Olive
LOC111393013	52.3055	-5.42175	-42.8657	0.737355	-7.35298	1.93841e-13	5.70847e-12	XP_022874213.1	MADS-box_protein_AGL42-like,_transcript_variant_X6	Olive	PF01486:K-box_region//PF00319:SRF-type_transcription_factor_(DNA-binding_and_dimerisation_domain)	IPR036879:Transcription factor, MADS-box superfamily//IPR002100:Transcription factor, MADS-box//IPR002487:Transcription factor, K-box//IPR033896:MADS MEF2-like
LOC111396190	198.568	-5.42166	-42.8629	0.390931	-13.8686	9.8196e-44	2.20162e-41	XP_022878302.1	NAC_transcription_factor_29-like	Olive	PF02365:No_apical_meristem_(NAM)_protein	IPR003441:NAC domain//IPR036093:NAC domain superfamily
LOC111398321	98.2967	-5.3302	-40.2299	0.533315	-9.99446	1.61163e-23	1.04433e-21			Olive
LOC111384431	113.122	-5.27051	-38.5995	0.490651	-10.7419	6.47204e-27	5.51041e-25	XP_022864474.1	cysteine-rich_receptor-like_protein_kinase_29	Olive	PF07714:Protein_tyrosine_kinase	IPR011009:Protein kinase-like domain superfamily//IPR000719:Protein kinase domain
LOC111379180	112.561	-5.25699	-38.2395	0.497796	-10.5605	4.54085e-26	3.58482e-24	XP_022858289.1	probable_polyol_transporter_6	Olive	PF00083:Sugar_(and_other)_transporter	IPR005829:Sugar transporter, conserved site//IPR003663:Sugar/inositol transporter//IPR036259:MFS transporter superfamily//IPR020846:Major facilitator superfamily domain
LOC111367567	56.0553	-5.25497	-38.186	0.685678	-7.66391	1.80355e-14	5.79878e-13	XP_022844323.1	MADS-box_protein_JOINTLESS-like,_transcript_variant_X7	Olive	PF01486:K-box_region	IPR002487:Transcription factor, K-box
LOC111397297	68.1838	-5.11279	-34.6021	0.614117	-8.32543	8.40251e-17	3.27445e-15	XP_022879911.1	calcium_uniporter_protein_4,_mitochondrial-like	Olive	PF04678:Mitochondrial_calcium_uniporter
LOC111393511	101.825	-5.11034	-34.5436	0.498774	-10.2458	1.23578e-24	8.65842e-23	XP_022874843.1	endochitinase_EP3-like	Olive	PF00182:Chitinase_class_I	IPR036861:Endochitinase-like superfamily//IPR018371:Chitin-binding, type 1, conserved site//IPR023346:Lysozyme-like domain superfamily//IPR001002:Chitin-binding, type 1//IPR000726:Glycoside hydrolase, family 19, catalytic//IPR016283:Glycoside hydrolase, family 19
LOC111382320	84.3671	-5.10525	-34.4217	0.568556	-8.97932	2.72452e-19	1.26909e-17	XP_022862024.1	ATP-dependent_RNA_helicase_glh-2-like	Olive
LOC111398706	80.2825	-5.03039	-32.6811	0.542874	-9.26622	1.92867e-20	9.73921e-19	XP_022881517.1	EG45-like_domain_containing_protein	Olive	PF03330:Lytic_transglycolase	IPR036908:RlpA-like domain superfamily//IPR007112:Expansin/pollen allergen, DPBB domain
LOC111385774	88.3835	-5.02951	-32.6612	0.524193	-9.59476	8.41157e-22	4.7227e-20	XP_022865957.1	endoglucanase-like	Olive	PF00759:Glycosyl_hydrolase_family_9	IPR008928:Six-hairpin glycosidase superfamily//IPR033126:Glycosyl hydrolases family 9, Asp/Glu active sites//IPR012341:Six-hairpin glycosidase-like superfamily
LOC111390208	87.7681	-5.0197	-32.44	0.532041	-9.4348	3.91724e-21	2.08121e-19	XP_022870982.1	uncharacterized_LOC111390208	Olive
LOC111392847	69.4177	-4.97156	-31.3753	0.573707	-8.66567	4.48851e-18	1.90357e-16	XP_022874008.1	protein_LITTLE_ZIPPER_3-like	Olive
LOC111375723	60.6551	-4.9505	-30.9206	0.617968	-8.01092	1.13851e-15	4.04747e-14	XP_022854358.1	oligopeptide_transporter_7	Olive	PF03169:OPT_oligopeptide_transporter_protein	IPR004813:Oligopeptide transporter, OPT superfamily//IPR004648:Tetrapeptide transporter, OPT1/isp4
LOC111388132	52.8322	-4.94672	-30.8398	0.671309	-7.36877	1.72209e-13	5.09372e-12	XP_022868576.1	transcription_factor_PRE6-like	Olive	PF00010:Helix-loop-helix_DNA-binding_domain	IPR011598:Myc-type, basic helix-loop-helix (bHLH) domain//IPR036638:Helix-loop-helix DNA-binding domain superfamily
LOC111371180	98.1446	-4.93393	-30.5675	0.49502	-9.96711	2.1231e-23	1.36264e-21	XP_022848852.1	endoglucanase-like	Olive	PF00759:Glycosyl_hydrolase_family_9	IPR012341:Six-hairpin glycosidase-like superfamily//IPR008928:Six-hairpin glycosidase superfamily
LOC111386881	51.1714	-4.89787	-29.8131	0.670221	-7.30785	2.71446e-13	7.84953e-12	XP_022867140.1	cytochrome_P450_81D11-like	Olive	PF00067:Cytochrome_P450	IPR001128:Cytochrome P450//IPR036396:Cytochrome P450 superfamily//IPR002401:Cytochrome P450, E-class, group I//IPR017972:Cytochrome P450, conserved site
LOC111393301	91.4534	-4.83777	-28.5966	0.500057	-9.67444	3.87189e-22	2.22591e-20	XP_022874530.1	protein_CUP-SHAPED_COTYLEDON_3-like	Olive	PF02365:No_apical_meristem_(NAM)_protein	IPR036093:NAC domain superfamily//IPR003441:NAC domain
LOC111390480	94.4376	-4.77629	-27.4035	0.487517	-9.79717	1.15785e-22	6.96595e-21	XP_022871296.1	transcription_factor_MYB8-like	Olive	PF00249:Myb-like_DNA-binding_domain	IPR009057:Homeobox-like domain superfamily//IPR001005:SANT/Myb domain//IPR017930:Myb domain
LOC111412367	62.9991	-4.66959	-25.45	0.569256	-8.20298	2.34503e-16	8.74342e-15	XP_022899035.1	non-specific_lipid-transfer_protein-like_protein_At2g13820	Olive	PF14368:Probable_lipid_transfer	IPR036312:Bifunctional inhibitor/plant lipid transfer protein/seed storage helical domain superfamily//IPR016140:Bifunctional inhibitor/plant lipid transfer protein/seed storage helical domain//IPR000528:Plant lipid transfer protein/Par allergen
LOC111367948	75.4891	-4.66551	-25.378	0.517239	-9.02003	1.88035e-19	8.86927e-18	XP_022844848.1	GDSL_esterase/lipase_At2g23540-like	Olive	PF00657:GDSL-like_Lipase/Acylhydrolase	IPR035669:GDSL lipase/esterase-like, plant//IPR036514:SGNH hydrolase superfamily
LOC111382291	67.1457	-4.63534	-24.8528	1.32065	-3.50989	0.000448288	0.00302678	XP_022861978.1	sugar_transport_protein_8-like	Olive	PF00083:Sugar_(and_other)_transporter	IPR036259:MFS transporter superfamily//IPR003663:Sugar/inositol transporter//IPR005829:Sugar transporter, conserved site//IPR020846:Major facilitator superfamily domain
LOC111376535	54.9298	-4.61673	-24.5344	0.596405	-7.74094	9.86869e-15	3.23483e-13	XP_022855266.1	cytochrome_P450_86B1-like	Olive	PF00067:Cytochrome_P450	IPR036396:Cytochrome P450 superfamily//IPR001128:Cytochrome P450//IPR017972:Cytochrome P450, conserved site//IPR002401:Cytochrome P450, E-class, group I
LOC111389453	114.273	-4.59775	-24.2137	0.41845	-10.9876	4.38568e-28	3.96491e-26	XP_022870138.1	NAC_transcription_factor_56-like	Olive	PF02365:No_apical_meristem_(NAM)_protein	IPR036093:NAC domain superfamily//IPR003441:NAC domain
LOC111401991	106.867	-4.57905	-23.9019	0.429759	-10.6549	1.65358e-26	1.35638e-24	XP_022885763.1	cytochrome_P450_81D1-like	Olive	PF00067:Cytochrome_P450	IPR002401:Cytochrome P450, E-class, group I//IPR036396:Cytochrome P450 superfamily//IPR001128:Cytochrome P450//IPR017972:Cytochrome P450, conserved site
LOC111403197	68.8889	-4.53681	-23.2122	0.548317	-8.27406	1.29468e-16	4.94787e-15	XP_022887373.1	3-ketoacyl-CoA_synthase_6-like	Olive	PF08392:FAE1/Type_III_polyketide_synthase-like_protein//PF08541:3-Oxoacyl-[acyl-carrier-protein_(ACP)]_synthase_III_C_terminal	IPR016039:Thiolase-like
LOC111412115	74.3203	-4.52802	-23.0711	0.513672	-8.815	1.1968e-18	5.30299e-17	XP_022898658.1	fatty_acyl-CoA_reductase_3-like	Olive	PF07993:Male_sterility_protein//PF03015:Male_sterility_protein	IPR033640:Fatty acyl-CoA reductase, C-terminal//IPR036291:NAD(P)-binding domain superfamily
LOC111410283	68.9861	-4.52646	-23.0462	0.55976	-8.08643	6.14372e-16	2.21457e-14	XP_022896315.1	terpene_synthase_10-like	Olive	PF03936:Terpene_synthase_family,_metal_binding_domain//PF01397:Terpene_synthase,_N-terminal_domain	IPR034741:Terpene cyclase-like 1, C-terminal domain//IPR036965:Terpene synthase, N-terminal domain superfamily//IPR008930:Terpenoid cyclases/protein prenyltransferase alpha-alpha toroid//IPR008949:Isoprenoid synthase domain superfamily
LOC111396650	92.7287	-4.45112	-21.8737	0.450827	-9.87325	5.43752e-23	3.3554e-21	XP_022878859.1	FAM10_family_protein_At4g22670-like,_transcript_variant_X2	Olive
LOC111391077	59.6633	-4.43059	-21.5646	0.613603	-7.22062	5.1753e-13	1.46015e-11	XP_022871987.1	ethylene-responsive_transcription_factor_ERF110-like	Olive	PF00847:AP2_domain	IPR001471:AP2/ERF domain//IPR036955:AP2/ERF domain superfamily//IPR016177:DNA-binding domain superfamily
LOC111402197	59.0274	-4.42072	-21.4175	0.560848	-7.88221	3.21651e-15	1.10157e-13	XP_022886119.1	AAA-ATPase_At5g57480-like	Olive	PF00004:ATPase_family_associated_with_various_cellular_activities_(AAA)//PF14363:Domain_associated_at_C-terminal_with_AAA	IPR027417:P-loop containing nucleoside triphosphate hydrolase//IPR003593:AAA+ ATPase domain
LOC111389639	90.0923	-4.40437	-21.1761	0.453499	-9.71197	2.68099e-22	1.56808e-20	XP_022870341.1	cytochrome_P450_86A1-like	Olive	PF00067:Cytochrome_P450	IPR001128:Cytochrome P450//IPR017972:Cytochrome P450, conserved site//IPR036396:Cytochrome P450 superfamily//IPR002401:Cytochrome P450, E-class, group I
LOC111392039	78.461	-4.38753	-20.9304	0.504326	-8.69978	3.3253e-18	1.42463e-16	XP_022873094.1	cytochrome_P450_94A2-like	Olive	PF00067:Cytochrome_P450	IPR036396:Cytochrome P450 superfamily//IPR001128:Cytochrome P450//IPR002401:Cytochrome P450, E-class, group I
LOC111377905	66.4005	-4.34981	-20.3903	0.513883	-8.4646	2.57027e-17	1.03522e-15	XP_022856822.1	hexose_carrier_protein_HEX6-like	Olive	PF00083:Sugar_(and_other)_transporter	IPR005829:Sugar transporter, conserved site//IPR020846:Major facilitator superfamily domain//IPR003663:Sugar/inositol transporter//IPR036259:MFS transporter superfamily
LOC111398732	70.0211	-4.31821	-19.9485	0.533653	-8.0918	5.87893e-16	2.12596e-14	XP_022881560.1	LRR_receptor-like_serine/threonine-protein_kinase_GSO1,_transcript_variant_X5	Olive	PF13855:Leucine_rich_repeat//PF08263:Leucine_rich_repeat_N-terminal_domain//PF00560:Leucine_Rich_Repeat//PF13516:Leucine_Rich_repeat	IPR001611:Leucine-rich repeat//IPR032675:Leucine-rich repeat domain superfamily//IPR003591:Leucine-rich repeat, typical subtype
LOC111405457	64.7193	-4.31631	-19.9223	0.522444	-8.26178	1.43515e-16	5.45992e-15	XP_022890118.1	probable_LRR_receptor-like_serine/threonine-protein_kinase_At3g47570	Olive	PF00069:Protein_kinase_domain//PF08263:Leucine_rich_repeat_N-terminal_domain//PF00560:Leucine_Rich_Repeat//PF13855:Leucine_rich_repeat	IPR017441:Protein kinase, ATP binding site//IPR008271:Serine/threonine-protein kinase, active site//IPR032675:Leucine-rich repeat domain superfamily//IPR011009:Protein kinase-like domain superfamily//IPR000719:Protein kinase domain//IPR003591:Leucine-rich repeat, typical subtype
LOC111402434	84.6734	-4.31379	-19.8876	0.452024	-9.54328	1.3838e-21	7.65439e-20	XP_022886496.1	tryptophan_synthase_beta_chain_1-like	Olive	PF00291:Pyridoxal-phosphate_dependent_enzyme	IPR036052:Tryptophan synthase beta subunit-like PLP-dependent enzyme//IPR023026:Tryptophan synthase beta chain/beta chain-like//IPR006654:Tryptophan synthase, beta chain//IPR006653:Tryptophan synthase, beta chain, conserved site
LOC111392612	87.4831	-4.27648	-19.3797	0.442766	-9.65854	4.52243e-22	2.59104e-20	XP_022873739.1	MDIS1-interacting_receptor_like_kinase_2-like	Olive	PF00069:Protein_kinase_domain	IPR008266:Tyrosine-protein kinase, active site//IPR011009:Protein kinase-like domain superfamily//IPR000719:Protein kinase domain
LOC111381518	54.5719	-4.17287	-18.0368	0.543881	-7.6724	1.68802e-14	5.44816e-13	XP_022861075.1	uncharacterized_LOC111381518	Olive
LOC111403309	55.2219	-4.06743	-16.7656	0.533093	-7.62987	2.34983e-14	7.49782e-13	XP_022887526.1	truncated_transcription_factor_CAULIFLOWER_A-like	Olive	PF01486:K-box_region//PF00319:SRF-type_transcription_factor_(DNA-binding_and_dimerisation_domain)	IPR036879:Transcription factor, MADS-box superfamily//IPR002487:Transcription factor, K-box//IPR002100:Transcription factor, MADS-box//IPR033896:MADS MEF2-like
LOC111390670	57.6498	-4.02394	-16.2677	0.513008	-7.84381	4.37077e-15	1.47881e-13	XP_022871502.1	uncharacterized_LOC111390670,_transcript_variant_X2	Olive		IPR011990:Tetratricopeptide-like helical domain superfamily//IPR013026:Tetratricopeptide repeat-containing domain
LOC111367123	65.0342	-4.00679	-16.0755	0.485368	-8.25515	1.51707e-16	5.75852e-15	XP_022843615.1	vignain-like	Olive	PF00112:Papain_family_cysteine_protease//PF08246:Cathepsin_propeptide_inhibitor_domain_(I29)	IPR025661:Cysteine peptidase, asparagine active site//IPR038765:Papain-like cysteine peptidase superfamily//IPR000668:Peptidase C1A, papain C-terminal//IPR025660:Cysteine peptidase, histidine active site//IPR000169:Cysteine peptidase, cysteine active site//IPR013201:Cathepsin propeptide inhibitor domain (I29)//IPR039417:Papain-like cysteine endopeptidase
LOC111385282	50.9227	-3.73796	-13.3426	0.579405	-6.45139	1.10831e-10	2.3817e-09		beta-galactosidase_14-like	Olive
LOC111383120	51.2532	-3.73171	-13.2849	0.519291	-7.18616	6.6637e-13	1.85365e-11	XP_022862962.1	putative_methylesterase_11,_chloroplastic	Olive	PF12697:Alpha/beta_hydrolase_family	IPR029058:Alpha/Beta hydrolase fold
LOC111390577	52.4278	-3.67218	-12.7478	0.498931	-7.3601	1.83774e-13	5.42149e-12	XP_022871406.1	uncharacterized_LOC111390577	Olive	PF05664:Plant_family_of_unknown_function_(DUF810)	IPR014772:Mammalian uncoordinated homology 13, domain 2//IPR014770:Munc13 homology 1
LOC111384954	55.2248	-3.65589	-12.6047	0.491559	-7.43734	1.02736e-13	3.10155e-12	XP_022865070.1	WRKY_transcription_factor_6-like,_transcript_variant_X2	Olive	PF03106:WRKY_DNA_-binding_domain	IPR003657:WRKY domain//IPR036576:WRKY domain superfamily
LOC111366093	51.1841	-3.62943	-12.3756	0.514892	-7.04892	1.80311e-12	4.81273e-11	XP_022842515.1	protein_LURP-one-related_6	Olive	PF04525:LURP-one-related	IPR038595:LURP-one-related superfamily//IPR025659:Tubby-like, C-terminal

## Sheet: DE_Specific_P28
Genes	baseMean	log2FoldChange	FoldChange	lfcSE	stat	pvalue	padj	Gene_ID	description	Organism	pfam	Interpro
LOC111389777	85.6092	4.98337	31.6333	0.547244	9.1063	8.52409e-20	4.11887e-18	XP_022870513.1	chorismate_synthase_2,_chloroplastic-like	Olive	PF01264:Chorismate_synthase	IPR035904:Chorismate synthase AroC superfamily//IPR020541:Chorismate synthase, conserved site
LOC111411422	50.0457	5.25681	38.2348	0.777556	6.76069	1.3734e-11	3.31578e-10	XP_022897725.1	dirigent_protein_15-like	Olive	PF03018:Dirigent-like_protein
LOC111377292	85.3075	7.36981	165.4	1.09209	6.74835	1.49537e-11	3.5935e-10	XP_022856136.1	putative_expansin-B2	Olive	PF03330:Lytic_transglycolase//PF01357:Pollen_allergen	IPR005795:Major pollen allergen Lol pI//IPR036908:RlpA-like domain superfamily//IPR007112:Expansin/pollen allergen, DPBB domain//IPR007117:Expansin, cellulose-binding-like domain//IPR036749:Expansin, cellulose-binding-like domain superfamily//IPR007118:Expansin/Lol pI
LOC111365434	78.4947	7.40697	169.715	2.95089	2.51008	0.0120703	0.0491151	XP_022841745.1	cytochrome_c_oxidase_subunit_6a,_mitochondrial-like	Olive	PF02046:Cytochrome_c_oxidase_subunit_VIa	IPR036418:Cytochrome c oxidase, subunit VIa superfamily//IPR001349:Cytochrome c oxidase, subunit VIa
