# Supplementary material for: Characterization of Transcriptome Dynamics during Early Fruit Development in Olive (Olea europaea L.)
Source: Int J Mol Sci. 2023 Jan 4;24(2):961. doi: 10.3390/ijms24020961 (PMC9864153; doi:10.3390/ijms24020961)
Supplement: Supplementary file 1 [file ijms-24-00961-s001.zip › Table S9_P14_vs_P0_UP_Functional_Enrichment.xlsx]

## Sheet: Functional_Enrichment
Supplementary Table S9. The enrichment analysis of GO terms based on up-regulated DEGs in the dividing fruits at 14 (P14) versus the flowers at anthesis stage (P0) during early olive fruit development.
Category	Description	#Genes	pValue	#Genes
GO:0016021	C:integral_component_of_membrane	1106	4.940656e-324	Transcript_000076;Transcript_000155;Transcript_000203;Transcript_000240;Transcript_000483;Transcript_000645;Transcript_000832;Transcript_000914;Transcript_001064;Transcript_001093;Transcript_001112;Transcript_001242;Transcript_001489;Transcript_001494;Transcript_001570;Transcript_001655;Transcript_001681;Transcript_001711;Transcript_002045;Transcript_002052;Transcript_002169;Transcript_002320;Tra…
GO:0005634	C:nucleus	1077	4.940656e-324	Transcript_000103;Transcript_000187;Transcript_000349;Transcript_000430;Transcript_000579;Transcript_001079;Transcript_001223;Transcript_001478;Transcript_001658;Transcript_002009;Transcript_002519;Transcript_002727;Transcript_002811;Transcript_003163;Transcript_003398;Transcript_003795;Transcript_003797;Transcript_003919;Transcript_004120;Transcript_004260;Transcript_004316;Transcript_004532;Tra…
GO:0005524	F:ATP_binding	878	4.940656e-324	Transcript_000155;Transcript_000483;Transcript_000719;Transcript_000781;Transcript_001242;Transcript_001647;Transcript_001681;Transcript_001759;Transcript_002020;Transcript_002051;Transcript_002169;Transcript_002930;Transcript_003029;Transcript_003144;Transcript_003265;Transcript_003320;Transcript_003646;Transcript_003919;Transcript_003957;Transcript_004033;Transcript_004120;Transcript_004252;Tra…
GO:0005737	C:cytoplasm	738	4.940656e-324	Transcript_000349;Transcript_000430;Transcript_000495;Transcript_000567;Transcript_000594;Transcript_001147;Transcript_001387;Transcript_001431;Transcript_001670;Transcript_001880;Transcript_002037;Transcript_002519;Transcript_002884;Transcript_003029;Transcript_003137;Transcript_003163;Transcript_003307;Transcript_003949;Transcript_004033;Transcript_004067;Transcript_004120;Transcript_004260;Tra…
GO:0005886	C:plasma_membrane	684	4.940656e-324	Transcript_000155;Transcript_000483;Transcript_000872;Transcript_000997;Transcript_001242;Transcript_001431;Transcript_001655;Transcript_001681;Transcript_001711;Transcript_002037;Transcript_002169;Transcript_002519;Transcript_002930;Transcript_003320;Transcript_003585;Transcript_003646;Transcript_003919;Transcript_003957;Transcript_004067;Transcript_004252;Transcript_004316;Transcript_004574;Tra…
GO:0046872	F:metal_ion_binding_	589	1.134209e-311	Transcript_000049;Transcript_000579;Transcript_000599;Transcript_000882;Transcript_001711;Transcript_001759;Transcript_002541;Transcript_003646;Transcript_004378;Transcript_004875;Transcript_005080;Transcript_005103;Transcript_005521;Transcript_005683;Transcript_005882;Transcript_006015;Transcript_006099;Transcript_006501;Transcript_006826;Transcript_007313;Transcript_007951;Transcript_008373;Tra…
GO:0005829	C:cytosol	517	5.06871e-254	Transcript_002037;Transcript_002519;Transcript_002811;Transcript_003163;Transcript_003383;Transcript_003545;Transcript_003646;Transcript_003801;Transcript_003949;Transcript_004120;Transcript_004587;Transcript_004917;Transcript_005006;Transcript_005018;Transcript_005281;Transcript_005397;Transcript_005656;Transcript_005683;Transcript_006099;Transcript_006150;Transcript_006356;Transcript_006402;Tra…
GO:0009507	C:chloroplast	499	9.20087e-241	Transcript_000380;Transcript_000882;Transcript_001088;Transcript_001578;Transcript_001647;Transcript_001997;Transcript_002020;Transcript_002052;Transcript_002106;Transcript_002810;Transcript_004354;Transcript_004917;Transcript_005103;Transcript_005196;Transcript_005220;Transcript_005378;Transcript_005953;Transcript_006099;Transcript_006334;Transcript_006354;Transcript_006370;Transcript_006390;Tra…
GO:0006351	P:transcription,_DNA-templated	424	1.5601e-285	Transcript_000187;Transcript_001223;Transcript_001478;Transcript_001578;Transcript_001658;Transcript_003795;Transcript_004120;Transcript_004532;Transcript_004579;Transcript_004956;Transcript_005296;Transcript_005368;Transcript_005521;Transcript_005776;Transcript_005847;Transcript_005911;Transcript_006356;Transcript_006408;Transcript_006476;Transcript_006542;Transcript_006776;Transcript_006963;Tra…
GO:0003677	F:DNA_binding	381	5.84966e-218	Transcript_000187;Transcript_001223;Transcript_001478;Transcript_001578;Transcript_001658;Transcript_004532;Transcript_004579;Transcript_004752;Transcript_004819;Transcript_004938;Transcript_005368;Transcript_005543;Transcript_005847;Transcript_005911;Transcript_006408;Transcript_006476;Transcript_006501;Transcript_006678;Transcript_006776;Transcript_006963;Transcript_007421;Transcript_007485;Tra…
GO:0008270	F:zinc_ion_binding	325	3.86529e-166	Transcript_000832;Transcript_001067;Transcript_002866;Transcript_003627;Transcript_003797;Transcript_004086;Transcript_004501;Transcript_004984;Transcript_006390;Transcript_007164;Transcript_007351;Transcript_007527;Transcript_008952;Transcript_009107;Transcript_009827;Transcript_009909;Transcript_010049;Transcript_010789;Transcript_010969;Transcript_011753;Transcript_012036;Transcript_012117;Tra…
GO:0006355	P:regulation_of_transcription,_DNA-templated	317	1.35021e-185	Transcript_000187;Transcript_001223;Transcript_001658;Transcript_003795;Transcript_004532;Transcript_005521;Transcript_005911;Transcript_006408;Transcript_006501;Transcript_006678;Transcript_006758;Transcript_006776;Transcript_006963;Transcript_007485;Transcript_007556;Transcript_007752;Transcript_008035;Transcript_008062;Transcript_009473;Transcript_009778;Transcript_009786;Transcript_011139;Tra…
GO:0005739	C:mitochondrion	313	4.85937e-173	Transcript_000579;Transcript_000781;Transcript_002037;Transcript_002810;Transcript_003355;Transcript_003919;Transcript_005241;Transcript_005281;Transcript_005378;Transcript_005656;Transcript_006096;Transcript_006099;Transcript_006196;Transcript_006390;Transcript_006683;Transcript_007313;Transcript_007421;Transcript_007527;Transcript_007545;Transcript_007852;Transcript_007908;Transcript_008004;Tra…
GO:0009506	C:plasmodesma	300	5.08333e-144	Transcript_000349;Transcript_000483;Transcript_001242;Transcript_001576;Transcript_001681;Transcript_002051;Transcript_002519;Transcript_002810;Transcript_002930;Transcript_003383;Transcript_003957;Transcript_004252;Transcript_004316;Transcript_004574;Transcript_004665;Transcript_004917;Transcript_005281;Transcript_005429;Transcript_005688;Transcript_005953;Transcript_006369;Transcript_006593;Tra…
GO:0016020	C:membrane	274	3.81047e-140	Transcript_002930;Transcript_003585;Transcript_003919;Transcript_004120;Transcript_004775;Transcript_005449;Transcript_006099;Transcript_006464;Transcript_006542;Transcript_006757;Transcript_006794;Transcript_007313;Transcript_010192;Transcript_010715;Transcript_011325;Transcript_011644;Transcript_011873;Transcript_012127;Transcript_012209;Transcript_012467;Transcript_012726;Transcript_013980;Tra…
GO:0005794	C:Golgi_apparatus	242	1.60277e-125	Transcript_001681;Transcript_001725;Transcript_002525;Transcript_003176;Transcript_004469;Transcript_004498;Transcript_005080;Transcript_005796;Transcript_006151;Transcript_007188;Transcript_007752;Transcript_008619;Transcript_011644;Transcript_012422;Transcript_012474;Transcript_013087;Transcript_013594;Transcript_013812;Transcript_014408;Transcript_014566;Transcript_014592;Transcript_014631;Tra…
GO:0004674	F:protein_serine/threonine_kinase_activity	209	6.91099e-117	Transcript_000155;Transcript_001647;Transcript_001759;Transcript_002020;Transcript_002169;Transcript_003265;Transcript_003646;Transcript_004120;Transcript_004316;Transcript_004839;Transcript_006369;Transcript_006898;Transcript_007507;Transcript_007951;Transcript_008373;Transcript_008879;Transcript_009059;Transcript_010386;Transcript_011036;Transcript_011423;Transcript_011532;Transcript_011968;Tra…
GO:0003700	F:sequence-specific_DNA_binding_transcription_factor_activity	205	1.77817e-155	Transcript_000187;Transcript_001223;Transcript_001478;Transcript_004579;Transcript_005296;Transcript_005368;Transcript_005776;Transcript_005847;Transcript_006356;Transcript_006476;Transcript_006501;Transcript_006542;Transcript_009473;Transcript_010969;Transcript_011220;Transcript_011563;Transcript_012605;Transcript_012751;Transcript_014812;Transcript_016001;Transcript_016179;Transcript_016282;Tra…
GO:0003723	F:RNA_binding	186	2.57643e-109	Transcript_000719;Transcript_001088;Transcript_005006;Transcript_005349;Transcript_005521;Transcript_007788;Transcript_007852;Transcript_009915;Transcript_012127;Transcript_012222;Transcript_012406;Transcript_012444;Transcript_012467;Transcript_013435;Transcript_013457;Transcript_013812;Transcript_014745;Transcript_016794;Transcript_018247;Transcript_021590;Transcript_021601;Transcript_022302;Tra…
GO:0005789	C:endoplasmic_reticulum_membrane	183	6.60834e-103	Transcript_000240;Transcript_001064;Transcript_001112;Transcript_001655;Transcript_001907;Transcript_002237;Transcript_002320;Transcript_003458;Transcript_003577;Transcript_003919;Transcript_004220;Transcript_004775;Transcript_005241;Transcript_005417;Transcript_006151;Transcript_006698;Transcript_006794;Transcript_007425;Transcript_008257;Transcript_008566;Transcript_008619;Transcript_008765;Tra…
GO:0005576	C:extracellular_region	180	1.63668e-109	Transcript_000049;Transcript_000717;Transcript_000791;Transcript_003171;Transcript_003919;Transcript_004090;Transcript_004819;Transcript_005391;Transcript_005544;Transcript_006471;Transcript_006886;Transcript_007287;Transcript_007601;Transcript_007888;Transcript_008767;Transcript_009625;Transcript_009857;Transcript_009961;Transcript_010073;Transcript_010186;Transcript_010467;Transcript_012209;Tra…
GO:0003735	F:structural_constituent_of_ribosome	165	1.99365e-107	Transcript_001088;Transcript_007679;Transcript_008809;Transcript_009818;Transcript_010043;Transcript_011332;Transcript_012259;Transcript_012444;Transcript_012726;Transcript_013544;Transcript_013664;Transcript_014103;Transcript_014642;Transcript_014654;Transcript_014979;Transcript_016448;Transcript_016794;Transcript_017028;Transcript_017031;Transcript_017135;Transcript_017309;Transcript_017394;Tra…
GO:0006412	P:translation	164	5.04921e-103	Transcript_001088;Transcript_004120;Transcript_007679;Transcript_008809;Transcript_009818;Transcript_010043;Transcript_011332;Transcript_012259;Transcript_012444;Transcript_012726;Transcript_013544;Transcript_013664;Transcript_014103;Transcript_014642;Transcript_014654;Transcript_016448;Transcript_016794;Transcript_017028;Transcript_017031;Transcript_017135;Transcript_017309;Transcript_017394;Tra…
GO:0016567	P:protein_ubiquitination	164	3.24556e-75	Transcript_000832;Transcript_000997;Transcript_001927;Transcript_002009;Transcript_003144;Transcript_003398;Transcript_004086;Transcript_004093;Transcript_004587;Transcript_006393;Transcript_006688;Transcript_007808;Transcript_008952;Transcript_009066;Transcript_009827;Transcript_010049;Transcript_010389;Transcript_011770;Transcript_013600;Transcript_014473;Transcript_014701;Transcript_015008;Tra…
GO:0005783	C:endoplasmic_reticulum_	159	2.7806e-104	Transcript_001064;Transcript_002045;Transcript_003919;Transcript_004469;Transcript_004775;Transcript_004819;Transcript_005449;Transcript_006151;Transcript_006726;Transcript_006757;Transcript_008257;Transcript_008566;Transcript_009754;Transcript_009857;Transcript_011900;Transcript_012422;Transcript_012474;Transcript_013456;Transcript_013594;Transcript_014463;Transcript_015001;Transcript_016705;Tra…
GO:0000139	C:Golgi_membrane	139	4.28492e-87	Transcript_002237;Transcript_002525;Transcript_004469;Transcript_004498;Transcript_004507;Transcript_004851;Transcript_006525;Transcript_008619;Transcript_011514;Transcript_015028;Transcript_016927;Transcript_017448;Transcript_017829;Transcript_018689;Transcript_018828;Transcript_019335;Transcript_020271;Transcript_023111;Transcript_023654;Transcript_023927;Transcript_024015;Transcript_024543;Tra…
GO:0009570	C:chloroplast_stroma	132	6.01901e-69	Transcript_000380;Transcript_000882;Transcript_004917;Transcript_005103;Transcript_005220;Transcript_006334;Transcript_006397;Transcript_010060;Transcript_010061;Transcript_012523;Transcript_012726;Transcript_013189;Transcript_016210;Transcript_016668;Transcript_017184;Transcript_018511;Transcript_021173;Transcript_021946;Transcript_022039;Transcript_022710;Transcript_023213;Transcript_025090;Tra…
GO:0006952	P:defense_response	131	3.40771e-67	Transcript_002051;Transcript_004090;Transcript_004917;Transcript_005368;Transcript_005521;Transcript_006356;Transcript_007067;Transcript_007164;Transcript_007287;Transcript_007601;Transcript_008560;Transcript_008648;Transcript_012117;Transcript_012278;Transcript_012368;Transcript_012703;Transcript_013507;Transcript_014471;Transcript_015406;Transcript_015541;Transcript_015614;Transcript_015752;Tra…
GO:0005774	C:vacuolar_membrane	131	1.90112e-60	Transcript_000203;Transcript_000594;Transcript_000914;Transcript_001532;Transcript_001681;Transcript_002320;Transcript_002810;Transcript_004086;Transcript_006390;Transcript_006458;Transcript_009551;Transcript_010192;Transcript_010255;Transcript_012407;Transcript_014408;Transcript_014642;Transcript_014979;Transcript_015646;Transcript_016549;Transcript_016956;Transcript_017829;Transcript_018010;Tra…
GO:0005730	C:nucleolus	130	8.83486e-84	Transcript_000719;Transcript_005006;Transcript_005103;Transcript_005349;Transcript_006096;Transcript_006390;Transcript_007408;Transcript_009033;Transcript_009107;Transcript_014979;Transcript_015425;Transcript_016668;Transcript_016794;Transcript_017924;Transcript_018681;Transcript_020317;Transcript_021035;Transcript_021333;Transcript_023503;Transcript_025469;Transcript_026774;Transcript_027829;Tra…
GO:0016874	F:ligase_activity	129	1.22258e-70	Transcript_003144;Transcript_003797;Transcript_004086;Transcript_004984;Transcript_006933;Transcript_007164;Transcript_008228;Transcript_008592;Transcript_008734;Transcript_008952;Transcript_009827;Transcript_010049;Transcript_012117;Transcript_014701;Transcript_015008;Transcript_015018;Transcript_015082;Transcript_015301;Transcript_015646;Transcript_016151;Transcript_016564;Transcript_016634;Tra…
GO:0005525	F:GTP_binding	127	1.27587e-61	Transcript_000872;Transcript_001670;Transcript_002892;Transcript_003962;Transcript_004843;Transcript_005796;Transcript_006853;Transcript_008748;Transcript_010576;Transcript_011606;Transcript_011873;Transcript_012453;Transcript_012454;Transcript_012650;Transcript_013088;Transcript_013587;Transcript_013975;Transcript_014346;Transcript_014392;Transcript_014592;Transcript_014610;Transcript_015640;Tra…
GO:0015031	P:protein_transport	126	7.49171e-65	Transcript_000872;Transcript_001147;Transcript_003585;Transcript_006150;Transcript_008058;Transcript_008619;Transcript_010295;Transcript_011312;Transcript_011606;Transcript_012881;Transcript_013594;Transcript_014168;Transcript_014357;Transcript_014566;Transcript_014592;Transcript_016956;Transcript_017271;Transcript_017347;Transcript_018886;Transcript_019883;Transcript_020323;Transcript_021055;Tra…
GO:0000166	F:nucleotide_binding	120	7.7991e-53	Transcript_005349;Transcript_007788;Transcript_009321;Transcript_009915;Transcript_010789;Transcript_011688;Transcript_012406;Transcript_012467;Transcript_012893;Transcript_013435;Transcript_013812;Transcript_013999;Transcript_014013;Transcript_014745;Transcript_015020;Transcript_015286;Transcript_015332;Transcript_017353;Transcript_017864;Transcript_018408;Transcript_019177;Transcript_019818;Tra…
GO:0005618	C:cell_wall_	119	4.19217e-72	Transcript_000717;Transcript_001725;Transcript_003171;Transcript_004090;Transcript_005391;Transcript_005544;Transcript_006099;Transcript_007601;Transcript_007888;Transcript_009961;Transcript_010192;Transcript_013644;Transcript_014313;Transcript_014979;Transcript_015340;Transcript_015471;Transcript_015614;Transcript_016761;Transcript_017401;Transcript_017797;Transcript_018014;Transcript_020297;Tra…
GO:0046777	P:protein_autophosphorylation	118	2.48383e-70	Transcript_000483;Transcript_001242;Transcript_003646;Transcript_003957;Transcript_004120;Transcript_004252;Transcript_004316;Transcript_004574;Transcript_004665;Transcript_005429;Transcript_005953;Transcript_006369;Transcript_006593;Transcript_007202;Transcript_009110;Transcript_010309;Transcript_011036;Transcript_012333;Transcript_013468;Transcript_014471;Transcript_014701;Transcript_014914;Tra…
GO:0009535	C:chloroplast_thylakoid_membrane	111	1.99831e-48	Transcript_000076;Transcript_001647;Transcript_001711;Transcript_002020;Transcript_002052;Transcript_004200;Transcript_004378;Transcript_005999;Transcript_006390;Transcript_007269;Transcript_007546;Transcript_009197;Transcript_010060;Transcript_013668;Transcript_014016;Transcript_016146;Transcript_016279;Transcript_016676;Transcript_017452;Transcript_017531;Transcript_017667;Transcript_020208;Tra…
GO:0005773	C:vacuole	110	3.13427e-71	Transcript_000914;Transcript_001681;Transcript_004917;Transcript_005688;Transcript_007272;Transcript_009263;Transcript_009387;Transcript_009551;Transcript_010255;Transcript_011520;Transcript_012826;Transcript_013662;Transcript_014408;Transcript_014678;Transcript_014979;Transcript_015927;Transcript_016549;Transcript_016956;Transcript_017498;Transcript_017670;Transcript_017829;Transcript_018878;Tra…
GO:0005975	P:carbohydrate_metabolic_process	106	1.93335e-56	Transcript_001347;Transcript_003171;Transcript_007067;Transcript_007272;Transcript_007601;Transcript_008082;Transcript_008767;Transcript_010158;Transcript_012278;Transcript_012691;Transcript_012703;Transcript_013507;Transcript_013644;Transcript_014047;Transcript_015019;Transcript_015541;Transcript_015614;Transcript_017860;Transcript_018014;Transcript_018603;Transcript_019848;Transcript_020297;Tra…
GO:0005743	C:mitochondrial_inner_membrane	103	5.03527e-54	Transcript_001489;Transcript_002810;Transcript_003976;Transcript_004875;Transcript_005630;Transcript_006117;Transcript_010660;Transcript_010979;Transcript_011312;Transcript_015653;Transcript_015693;Transcript_016081;Transcript_017791;Transcript_019100;Transcript_027548;Transcript_028203;Transcript_030915;Transcript_031552;Transcript_032550;Transcript_033355;Transcript_033535;Transcript_034339;Tra…
GO:0009941	C:chloroplast_envelope	102	7.06524e-49	Transcript_001711;Transcript_006968;Transcript_012726;Transcript_015003;Transcript_015216;Transcript_016668;Transcript_016676;Transcript_017452;Transcript_020969;Transcript_021946;Transcript_023213;Transcript_025024;Transcript_025157;Transcript_025512;Transcript_025627;Transcript_026139;Transcript_026535;Transcript_026698;Transcript_027150;Transcript_027868;Transcript_028424;Transcript_028443;Tra…
GO:0031625	F:ubiquitin_protein_ligase_binding	101	5.46534e-58	Transcript_000483;Transcript_001242;Transcript_003919;Transcript_003957;Transcript_004252;Transcript_004316;Transcript_004574;Transcript_004665;Transcript_005018;Transcript_005429;Transcript_005953;Transcript_006369;Transcript_006593;Transcript_007202;Transcript_008592;Transcript_009110;Transcript_010309;Transcript_011036;Transcript_012333;Transcript_014471;Transcript_014914;Transcript_016705;Tra…
GO:0005840	C:ribosome_	101	2.4962e-69	Transcript_001088;Transcript_003355;Transcript_004120;Transcript_007679;Transcript_008809;Transcript_009818;Transcript_010043;Transcript_011332;Transcript_012259;Transcript_012726;Transcript_013544;Transcript_013664;Transcript_014654;Transcript_014979;Transcript_017028;Transcript_017031;Transcript_017309;Transcript_017394;Transcript_017425;Transcript_018528;Transcript_019666;Transcript_021650;Tra…
ko03010	Ribosome	98	8.50081e-73	Transcript_008809;Transcript_011332;Transcript_012726;Transcript_013664;Transcript_014103;Transcript_014642;Transcript_014979;Transcript_016448;Transcript_016794;Transcript_017028;Transcript_017309;Transcript_018213;Transcript_018528;Transcript_019318;Transcript_021650;Transcript_026167;Transcript_026238;Transcript_026774;Transcript_027457;Transcript_028113;Transcript_029353;Transcript_031477;Tra…
GO:0016491	F:oxidoreductase_activity	96	3.62681e-32	Transcript_000076;Transcript_003545;Transcript_004765;Transcript_006151;Transcript_006968;Transcript_007176;Transcript_007372;Transcript_010192;Transcript_010255;Transcript_011089;Transcript_011564;Transcript_011900;Transcript_012273;Transcript_014224;Transcript_015584;Transcript_016081;Transcript_016922;Transcript_021886;Transcript_022233;Transcript_023647;Transcript_026108;Transcript_029229;Tra…
GO:0005768	C:endosome_	95	3.4696e-49	Transcript_002320;Transcript_004469;Transcript_004498;Transcript_010331;Transcript_012881;Transcript_013812;Transcript_014566;Transcript_016927;Transcript_017184;Transcript_017271;Transcript_017571;Transcript_018980;Transcript_023383;Transcript_024015;Transcript_026410;Transcript_026635;Transcript_027094;Transcript_029215;Transcript_030209;Transcript_031234;Transcript_032853;Transcript_033544;Tra…
GO:0070062	C:extracellular_exosome	95	2.81292e-45	Transcript_000240;Transcript_003919;Transcript_004752;Transcript_005547;Transcript_006096;Transcript_006794;Transcript_007752;Transcript_008058;Transcript_009246;Transcript_009846;Transcript_013097;Transcript_013980;Transcript_014297;Transcript_015001;Transcript_015934;Transcript_017955;Transcript_018213;Transcript_018911;Transcript_020201;Transcript_020907;Transcript_022427;Transcript_023489;Tra…
ko04141	Protein_processing_in_endoplasmic_reticulum	93	9.75222e-43	Transcript_002222;Transcript_003144;Transcript_003458;Transcript_003919;Transcript_004120;Transcript_004469;Transcript_004775;Transcript_008257;Transcript_009857;Transcript_010389;Transcript_013594;Transcript_015282;Transcript_015701;Transcript_015858;Transcript_016564;Transcript_016705;Transcript_016803;Transcript_017048;Transcript_018820;Transcript_020271;Transcript_023790;Transcript_023927;Tra…
GO:0004842	F:ubiquitin-protein_transferase_activity	90	5.38452e-46	Transcript_003398;Transcript_003797;Transcript_004984;Transcript_006933;Transcript_007164;Transcript_008228;Transcript_008592;Transcript_008734;Transcript_008952;Transcript_009827;Transcript_010049;Transcript_014701;Transcript_015301;Transcript_016151;Transcript_016564;Transcript_016705;Transcript_017154;Transcript_018451;Transcript_018651;Transcript_019837;Transcript_020594;Transcript_023393;Tra…
GO:0005654	C:nucleoplasm	90	4.15209e-51	Transcript_001431;Transcript_005349;Transcript_005547;Transcript_006150;Transcript_006542;Transcript_007752;Transcript_007808;Transcript_008327;Transcript_008650;Transcript_009321;Transcript_011320;Transcript_012893;Transcript_013435;Transcript_014723;Transcript_015286;Transcript_016072;Transcript_017864;Transcript_018408;Transcript_020644;Transcript_020907;Transcript_023489;Transcript_024445;Tra…
ko01230	Biosynthesis_of_amino_acids	89	5.2042e-42	Transcript_002106;Transcript_002884;Transcript_005196;Transcript_005220;Transcript_006354;Transcript_006397;Transcript_006512;Transcript_012523;Transcript_013311;Transcript_015664;Transcript_017184;Transcript_017186;Transcript_018351;Transcript_018771;Transcript_023260;Transcript_025090;Transcript_027419;Transcript_027516;Transcript_027666;Transcript_028573;Transcript_030653;Transcript_030924;Tra…
GO:0071555	P:cell_wall_organization	89	4.37932e-58	Transcript_003949;Transcript_004851;Transcript_004937;Transcript_005391;Transcript_005544;Transcript_006525;Transcript_007513;Transcript_007601;Transcript_007888;Transcript_009961;Transcript_011644;Transcript_012883;Transcript_013605;Transcript_013644;Transcript_015028;Transcript_015340;Transcript_015614;Transcript_018014;Transcript_019335;Transcript_020297;Transcript_023383;Transcript_028765;Tra…
ko01200	Carbon_metabolism	87	2.54811e-52	Transcript_005220;Transcript_006512;Transcript_007527;Transcript_012770;Transcript_013311;Transcript_015664;Transcript_017186;Transcript_018351;Transcript_018566;Transcript_018771;Transcript_020798;Transcript_023260;Transcript_027666;Transcript_028726;Transcript_029726;Transcript_030924;Transcript_031909;Transcript_033355;Transcript_034153;Transcript_034155;Transcript_034258;Transcript_035652;Tra…
GO:0048046	C:apoplast_	83	4.90323e-43	Transcript_001725;Transcript_003949;Transcript_004917;Transcript_005823;Transcript_009263;Transcript_010192;Transcript_012278;Transcript_014047;Transcript_014313;Transcript_022039;Transcript_026887;Transcript_026928;Transcript_027524;Transcript_029202;Transcript_029514;Transcript_029726;Transcript_032864;Transcript_035659;Transcript_036840;Transcript_040354;Transcript_042324;Transcript_042858;Tra…
GO:0009651	P:response_to_salt_stress	82	3.66277e-63	Transcript_006390;Transcript_007373;Transcript_011753;Transcript_012406;Transcript_013812;Transcript_014764;Transcript_016956;Transcript_017072;Transcript_018566;Transcript_021788;Transcript_027524;Transcript_027548;Transcript_028226;Transcript_031559;Transcript_036696;Transcript_040354;Transcript_040625;Transcript_041464;Transcript_042074;Transcript_043491;Transcript_043650;Transcript_043998;Tra…
GO:0004675	F:transmembrane_receptor_protein_serine/threonine_kinase_activity	81	1.46298e-45	Transcript_000483;Transcript_001242;Transcript_003957;Transcript_004252;Transcript_004316;Transcript_004574;Transcript_004665;Transcript_005429;Transcript_005953;Transcript_006369;Transcript_006593;Transcript_007202;Transcript_009110;Transcript_010309;Transcript_011036;Transcript_012333;Transcript_014471;Transcript_014914;Transcript_018237;Transcript_018602;Transcript_024326;Transcript_030099;Tra…
GO:0007178	P:transmembrane_receptor_protein_serine/threonine_kinase_signaling_pathway	81	1.46298e-45	Transcript_000483;Transcript_001242;Transcript_003957;Transcript_004252;Transcript_004316;Transcript_004574;Transcript_004665;Transcript_005429;Transcript_005953;Transcript_006369;Transcript_006593;Transcript_007202;Transcript_009110;Transcript_010309;Transcript_011036;Transcript_012333;Transcript_014471;Transcript_014914;Transcript_018237;Transcript_018602;Transcript_024326;Transcript_030099;Tra…
GO:0001653	F:peptide_receptor_activity	81	3.10086e-47	Transcript_000483;Transcript_001242;Transcript_003957;Transcript_004252;Transcript_004316;Transcript_004574;Transcript_004665;Transcript_005429;Transcript_005953;Transcript_006369;Transcript_006593;Transcript_007202;Transcript_009110;Transcript_010309;Transcript_011036;Transcript_012333;Transcript_014471;Transcript_014914;Transcript_018237;Transcript_018602;Transcript_024326;Transcript_030099;Tra…
GO:0020037	F:heme_binding	81	4.04807e-42	Transcript_000049;Transcript_001112;Transcript_003577;Transcript_005882;Transcript_006381;Transcript_006562;Transcript_012770;Transcript_014836;Transcript_015693;Transcript_016952;Transcript_017498;Transcript_017667;Transcript_017735;Transcript_018210;Transcript_018511;Transcript_020209;Transcript_021523;Transcript_023351;Transcript_041171;Transcript_041652;Transcript_043170;Transcript_047379;Tra…
GO:0009755	P:hormone-mediated_signaling_pathway	79	7.15158e-48	Transcript_001242;Transcript_003957;Transcript_004252;Transcript_004316;Transcript_004574;Transcript_005429;Transcript_005953;Transcript_006369;Transcript_006542;Transcript_006593;Transcript_007202;Transcript_009110;Transcript_010309;Transcript_011036;Transcript_012333;Transcript_013468;Transcript_014471;Transcript_014914;Transcript_018237;Transcript_024326;Transcript_029482;Transcript_030099;Tra…
GO:0005802	C:trans-Golgi_network	78	8.50941e-44	Transcript_002320;Transcript_004469;Transcript_004498;Transcript_008648;Transcript_013812;Transcript_014357;Transcript_016927;Transcript_017184;Transcript_017271;Transcript_017571;Transcript_023383;Transcript_024015;Transcript_026410;Transcript_027094;Transcript_028467;Transcript_029215;Transcript_030209;Transcript_031234;Transcript_033752;Transcript_035136;Transcript_036322;Transcript_036997;Tra…
GO:0044822	F:poly(A)_RNA_binding	77	1.13743e-34	Transcript_000781;Transcript_001089;Transcript_004120;Transcript_008117;Transcript_009092;Transcript_009321;Transcript_012893;Transcript_015001;Transcript_015020;Transcript_019177;Transcript_020644;Transcript_023019;Transcript_023503;Transcript_026330;Transcript_026774;Transcript_031964;Transcript_032576;Transcript_035516;Transcript_041704;Transcript_042306;Transcript_043594;Transcript_043672;Tra…
GO:0051301	P:cell_division	76	6.76221e-50	Transcript_000103;Transcript_005368;Transcript_006688;Transcript_007314;Transcript_007752;Transcript_007763;Transcript_008054;Transcript_011770;Transcript_012605;Transcript_016024;Transcript_016217;Transcript_016279;Transcript_016873;Transcript_018454;Transcript_019957;Transcript_023157;Transcript_025455;Transcript_025715;Transcript_030766;Transcript_030990;Transcript_033297;Transcript_033497;Tra…
GO:0005506	F:iron_ion_binding	76	4.64883e-48	Transcript_001112;Transcript_003577;Transcript_006151;Transcript_006381;Transcript_006542;Transcript_006562;Transcript_014375;Transcript_014836;Transcript_015693;Transcript_016952;Transcript_017735;Transcript_017754;Transcript_018092;Transcript_018274;Transcript_023647;Transcript_024414;Transcript_026535;Transcript_030432;Transcript_041652;Transcript_045908;Transcript_047379;Transcript_050672;Tra…
GO:0003924	F:GTPase_activity	75	5.72861e-38	Transcript_001670;Transcript_002892;Transcript_003962;Transcript_004843;Transcript_006853;Transcript_007693;Transcript_008748;Transcript_012453;Transcript_012650;Transcript_013088;Transcript_013975;Transcript_014346;Transcript_014392;Transcript_014610;Transcript_017829;Transcript_018980;Transcript_025715;Transcript_026635;Transcript_029613;Transcript_031234;Transcript_033472;Transcript_033544;Tra…
GO:0006886	P:intracellular_protein_transport	75	3.705e-42	Transcript_005796;Transcript_010660;Transcript_013097;Transcript_014860;Transcript_017670;Transcript_017829;Transcript_018828;Transcript_018980;Transcript_020271;Transcript_023213;Transcript_023654;Transcript_023927;Transcript_024167;Transcript_026510;Transcript_026635;Transcript_027338;Transcript_027565;Transcript_029780;Transcript_031234;Transcript_031641;Transcript_033544;Transcript_033836;Tra…
ko05016	Huntington's_disease	74	2.44915e-26	Transcript_004875;Transcript_004938;Transcript_005630;Transcript_008525;Transcript_009107;Transcript_011139;Transcript_014860;Transcript_015263;Transcript_015653;Transcript_016808;Transcript_017791;Transcript_018890;Transcript_019100;Transcript_019608;Transcript_021261;Transcript_021333;Transcript_023779;Transcript_024392;Transcript_024930;Transcript_024991;Transcript_028854;Transcript_030460;Tra…
GO:0016787	F:hydrolase_activity	74	1.51695e-39	Transcript_001387;Transcript_006370;Transcript_006390;Transcript_009246;Transcript_010828;Transcript_011546;Transcript_014302;Transcript_015628;Transcript_017687;Transcript_018886;Transcript_020201;Transcript_022820;Transcript_023464;Transcript_025775;Transcript_025855;Transcript_026510;Transcript_028562;Transcript_031433;Transcript_033898;Transcript_039511;Transcript_042674;Transcript_043984;Tra…
GO:0005509	F:calcium_ion_binding	73	2.73053e-61	Transcript_003137;Transcript_004067;Transcript_004260;Transcript_004469;Transcript_009890;Transcript_010309;Transcript_014712;Transcript_015326;Transcript_016081;Transcript_016210;Transcript_018358;Transcript_021004;Transcript_021310;Transcript_023120;Transcript_023455;Transcript_024718;Transcript_026217;Transcript_026702;Transcript_027116;Transcript_031577;Transcript_032957;Transcript_036840;Tra…
GO:0006457	P:protein_folding	69	1.04995e-46	Transcript_000349;Transcript_002037;Transcript_007908;Transcript_009857;Transcript_013980;Transcript_014770;Transcript_015701;Transcript_019126;Transcript_023790;Transcript_025914;Transcript_026217;Transcript_030838;Transcript_030910;Transcript_031666;Transcript_032576;Transcript_032936;Transcript_033704;Transcript_034152;Transcript_034963;Transcript_037644;Transcript_039350;Transcript_044265;Tra…
GO:0046686	P:response_to_cadmium_ion	68	4.81802e-33	Transcript_004579;Transcript_004917;Transcript_005220;Transcript_006334;Transcript_010828;Transcript_011348;Transcript_013088;Transcript_013736;Transcript_018681;Transcript_023455;Transcript_024752;Transcript_025627;Transcript_027524;Transcript_027923;Transcript_030889;Transcript_030994;Transcript_033768;Transcript_039594;Transcript_040354;Transcript_043076;Transcript_043650;Transcript_044198;Tra…
GO:0003676	F:nucleic_acid_binding	68	2.17117e-25	Transcript_002009;Transcript_002866;Transcript_005281;Transcript_009350;Transcript_009909;Transcript_010789;Transcript_012036;Transcript_013527;Transcript_014671;Transcript_017354;Transcript_020710;Transcript_020851;Transcript_021447;Transcript_021829;Transcript_025065;Transcript_026715;Transcript_026822;Transcript_027645;Transcript_030460;Transcript_030567;Transcript_035030;Transcript_035767;Tra…
ko05169	Epstein-Barr_virus_infection	68	1.64161e-25	Transcript_002050;Transcript_003398;Transcript_004120;Transcript_004938;Transcript_009107;Transcript_009434;Transcript_010969;Transcript_011139;Transcript_013419;Transcript_016072;Transcript_016618;Transcript_016807;Transcript_019957;Transcript_021333;Transcript_024392;Transcript_025775;Transcript_027594;Transcript_030460;Transcript_031433;Transcript_031916;Transcript_036517;Transcript_040010;Tra…
GO:0006397	P:mRNA_processing	66	4.0125e-43	Transcript_001067;Transcript_001089;Transcript_001387;Transcript_005281;Transcript_007788;Transcript_009092;Transcript_012127;Transcript_012893;Transcript_013457;Transcript_015020;Transcript_015332;Transcript_017353;Transcript_017354;Transcript_020317;Transcript_024473;Transcript_026077;Transcript_027868;Transcript_027953;Transcript_028489;Transcript_029272;Transcript_029813;Transcript_031314;Tra…
GO:0009734	P:auxin-activated_signaling_pathway	65	3.63791e-31	Transcript_001478;Transcript_003398;Transcript_004532;Transcript_004665;Transcript_008062;Transcript_011688;Transcript_012490;Transcript_014614;Transcript_016397;Transcript_016813;Transcript_018597;Transcript_019049;Transcript_022445;Transcript_024752;Transcript_024774;Transcript_027923;Transcript_028007;Transcript_030947;Transcript_032764;Transcript_034176;Transcript_037235;Transcript_037367;Tra…
ko00190	Oxidative_phosphorylation	63	2.76157e-29	Transcript_002930;Transcript_004875;Transcript_005630;Transcript_009551;Transcript_011348;Transcript_014408;Transcript_015263;Transcript_015361;Transcript_015538;Transcript_015653;Transcript_016602;Transcript_016808;Transcript_017791;Transcript_018890;Transcript_019100;Transcript_020544;Transcript_021261;Transcript_023779;Transcript_024398;Transcript_024930;Transcript_024991;Transcript_028670;Tra…
GO:0006979	P:response_to_oxidative_stress	62	1.36248e-27	Transcript_000049;Transcript_000882;Transcript_001576;Transcript_004067;Transcript_005882;Transcript_007373;Transcript_007527;Transcript_007947;Transcript_009263;Transcript_009742;Transcript_011301;Transcript_012770;Transcript_014297;Transcript_017498;Transcript_018511;Transcript_018566;Transcript_023351;Transcript_031909;Transcript_034176;Transcript_036696;Transcript_040460;Transcript_041171;Tra…
GO:0007275	P:multicellular_organismal_development	62	1.04193e-41	Transcript_003797;Transcript_005391;Transcript_006758;Transcript_012532;Transcript_015380;Transcript_015858;Transcript_015976;Transcript_016282;Transcript_017685;Transcript_018597;Transcript_018651;Transcript_019060;Transcript_022253;Transcript_022412;Transcript_022623;Transcript_024752;Transcript_027923;Transcript_029215;Transcript_032764;Transcript_033950;Transcript_035131;Transcript_040637;Tra…
ko03040	Spliceosome	61	7.87376e-37	Transcript_001067;Transcript_001089;Transcript_005006;Transcript_005281;Transcript_006686;Transcript_007788;Transcript_010789;Transcript_012127;Transcript_012893;Transcript_017353;Transcript_017354;Transcript_027953;Transcript_029813;Transcript_035030;Transcript_036386;Transcript_037655;Transcript_038904;Transcript_040010;Transcript_042553;Transcript_042932;Transcript_044803;Transcript_046373;Tra…
ko04120	Ubiquitin_mediated_proteolysis	61	1.32368e-29	Transcript_002009;Transcript_003144;Transcript_003398;Transcript_003797;Transcript_006688;Transcript_008592;Transcript_010389;Transcript_011770;Transcript_016564;Transcript_016705;Transcript_016807;Transcript_018651;Transcript_020594;Transcript_024752;Transcript_027923;Transcript_028007;Transcript_028150;Transcript_030085;Transcript_031110;Transcript_031147;Transcript_031758;Transcript_031840;Tra…
GO:0009409	P:response_to_cold	60	3.61819e-38	Transcript_001711;Transcript_004260;Transcript_008952;Transcript_012406;Transcript_015019;Transcript_017408;Transcript_017588;Transcript_018408;Transcript_018566;Transcript_019177;Transcript_026071;Transcript_027562;Transcript_028226;Transcript_028361;Transcript_029726;Transcript_031577;Transcript_032690;Transcript_033391;Transcript_034417;Transcript_035659;Transcript_036696;Transcript_041388;Tra…
GO:0000287	F:magnesium_ion_binding_	60	3.43767e-38	Transcript_000852;Transcript_002892;Transcript_002930;Transcript_003320;Transcript_005220;Transcript_006512;Transcript_007170;Transcript_007545;Transcript_011348;Transcript_014297;Transcript_015290;Transcript_015361;Transcript_015640;Transcript_015664;Transcript_016685;Transcript_020201;Transcript_021956;Transcript_023260;Transcript_027829;Transcript_029613;Transcript_032853;Transcript_037817;Tra…
GO:0009737	P:response_to_abscisic_acid	60	9.27843e-45	Transcript_004819;Transcript_008004;Transcript_010897;Transcript_012502;Transcript_014463;Transcript_014764;Transcript_016956;Transcript_019837;Transcript_023455;Transcript_027642;Transcript_029215;Transcript_031147;Transcript_031559;Transcript_032683;Transcript_033391;Transcript_034176;Transcript_036696;Transcript_038744;Transcript_041388;Transcript_042756;Transcript_043491;Transcript_043650;Tra…
GO:0005874	C:microtubule	59	7.89985e-37	Transcript_003962;Transcript_006853;Transcript_008054;Transcript_008221;Transcript_012650;Transcript_013688;Transcript_013975;Transcript_014610;Transcript_017838;Transcript_025912;Transcript_028554;Transcript_033472;Transcript_033907;Transcript_042567;Transcript_044359;Transcript_053053;Transcript_053402;Transcript_056416;Transcript_057704;Transcript_063860;Transcript_065850;Transcript_070575;Tra…
ko04144	Endocytosis	59	1.85094e-28	Transcript_000872;Transcript_004067;Transcript_005796;Transcript_008746;Transcript_010295;Transcript_011918;Transcript_014860;Transcript_017713;Transcript_017829;Transcript_018886;Transcript_018980;Transcript_023455;Transcript_024907;Transcript_026609;Transcript_027565;Transcript_031283;Transcript_031577;Transcript_031641;Transcript_031951;Transcript_033774;Transcript_036792;Transcript_039901;Tra…
GO:0004672	F:protein_kinase_activity	58	3.89685e-44	Transcript_001647;Transcript_002020;Transcript_004120;Transcript_004316;Transcript_006352;Transcript_011036;Transcript_012490;Transcript_013468;Transcript_014471;Transcript_016249;Transcript_016397;Transcript_017930;Transcript_018198;Transcript_023198;Transcript_025133;Transcript_028243;Transcript_029185;Transcript_029482;Transcript_034615;Transcript_035219;Transcript_040935;Transcript_041618;Tra…
GO:0055114	P:oxidation-reduction_process	58	5.42466e-30	Transcript_002037;Transcript_003545;Transcript_010255;Transcript_014224;Transcript_015263;Transcript_015584;Transcript_016081;Transcript_016922;Transcript_018210;Transcript_018274;Transcript_019202;Transcript_020189;Transcript_020209;Transcript_022975;Transcript_024930;Transcript_027150;Transcript_028226;Transcript_033355;Transcript_034152;Transcript_037328;Transcript_037644;Transcript_038951;Tra…
GO:0016192	P:vesicle-mediated_transport	58	1.25136e-31	Transcript_005796;Transcript_008619;Transcript_013594;Transcript_014357;Transcript_014592;Transcript_017347;Transcript_017571;Transcript_017670;Transcript_018886;Transcript_019883;Transcript_021376;Transcript_022532;Transcript_024367;Transcript_024917;Transcript_026609;Transcript_027338;Transcript_027565;Transcript_028467;Transcript_029780;Transcript_033978;Transcript_035136;Transcript_036750;Tra…
GO:0006281	P:DNA_repair	58	1.26623e-28	Transcript_007421;Transcript_007752;Transcript_008592;Transcript_013610;Transcript_015019;Transcript_015634;Transcript_020191;Transcript_020316;Transcript_020594;Transcript_024653;Transcript_025469;Transcript_029817;Transcript_030179;Transcript_031675;Transcript_031964;Transcript_032228;Transcript_032690;Transcript_039757;Transcript_041509;Transcript_043708;Transcript_043968;Transcript_053673;Tra…
ko03013	RNA_transport	56	2.38785e-31	Transcript_004587;Transcript_006150;Transcript_007788;Transcript_010897;Transcript_012127;Transcript_013594;Transcript_025481;Transcript_027199;Transcript_031147;Transcript_031321;Transcript_031853;Transcript_036090;Transcript_038190;Transcript_041704;Transcript_042225;Transcript_042932;Transcript_043594;Transcript_043672;Transcript_055527;Transcript_066093;Transcript_100799;Transcript_103154;Tra…
ko00520	Amino_sugar_and_nucleotide_sugar_metabolism	56	7.14585e-25	Transcript_002525;Transcript_003524;Transcript_003949;Transcript_008082;Transcript_011644;Transcript_012883;Transcript_016927;Transcript_018566;Transcript_019848;Transcript_021879;Transcript_022475;Transcript_022801;Transcript_023111;Transcript_024940;Transcript_027302;Transcript_030209;Transcript_031292;Transcript_034685;Transcript_037115;Transcript_037736;Transcript_042164;Transcript_043198;Tra…
GO:0042803	F:protein_homodimerization_activity	56	9.15384e-33	Transcript_002811;Transcript_006393;Transcript_016364;Transcript_016829;Transcript_019423;Transcript_019591;Transcript_022821;Transcript_024465;Transcript_029398;Transcript_031196;Transcript_032934;Transcript_037488;Transcript_042164;Transcript_043024;Transcript_043998;Transcript_044878;Transcript_047222;Transcript_049193;Transcript_053673;Transcript_056416;Transcript_068323;Transcript_082911;Tra…
GO:0009536	C:plastid	55	4.02839e-29	Transcript_000076;Transcript_000380;Transcript_006397;Transcript_008627;Transcript_010061;Transcript_013189;Transcript_017700;Transcript_020323;Transcript_021056;Transcript_026130;Transcript_027516;Transcript_028443;Transcript_041446;Transcript_045065;Transcript_060720;Transcript_061583;Transcript_063396;Transcript_082911;Transcript_086016;Transcript_090548;Transcript_096165;Transcript_097854;Tra…
GO:0043565	F:sequence-specific_DNA_binding	54	1.29631e-56	Transcript_005296;Transcript_005776;Transcript_006356;Transcript_011220;Transcript_012751;Transcript_016913;Transcript_021601;Transcript_025772;Transcript_029010;Transcript_030597;Transcript_031010;Transcript_031196;Transcript_035564;Transcript_036681;Transcript_036696;Transcript_038744;Transcript_043998;Transcript_044869;Transcript_045887;Transcript_053341;Transcript_053727;Transcript_061032;Tra…
ko05012	Parkinson's_disease	53	5.12626e-24	Transcript_003144;Transcript_004875;Transcript_005630;Transcript_008525;Transcript_015263;Transcript_015653;Transcript_016705;Transcript_016808;Transcript_017791;Transcript_018890;Transcript_019100;Transcript_019608;Transcript_021261;Transcript_023779;Transcript_024930;Transcript_024991;Transcript_028854;Transcript_033355;Transcript_034168;Transcript_036111;Transcript_038425;Transcript_040269;Tra…
GO:0009505	C:plant-type_cell_wall	52	4.48379e-18	Transcript_000717;Transcript_001725;Transcript_009263;Transcript_010073;Transcript_010192;Transcript_011532;Transcript_012209;Transcript_014313;Transcript_015691;Transcript_021857;Transcript_021866;Transcript_021879;Transcript_025024;Transcript_029202;Transcript_029514;Transcript_037338;Transcript_042324;Transcript_042756;Transcript_044610;Transcript_050046;Transcript_050536;Transcript_062148;Tra…
ko00500	Starch_and_sucrose_metabolism	52	1.54471e-28	Transcript_002525;Transcript_009468;Transcript_009682;Transcript_010204;Transcript_012883;Transcript_015471;Transcript_016927;Transcript_017401;Transcript_017860;Transcript_018566;Transcript_019848;Transcript_021222;Transcript_022801;Transcript_023111;Transcript_029575;Transcript_030209;Transcript_033866;Transcript_037115;Transcript_038709;Transcript_043198;Transcript_044180;Transcript_044610;Tra…
GO:0030246	F:carbohydrate_binding_	52	6.26581e-30	Transcript_000155;Transcript_004316;Transcript_004507;Transcript_009754;Transcript_011036;Transcript_012333;Transcript_012691;Transcript_017955;Transcript_018298;Transcript_018442;Transcript_024073;Transcript_026217;Transcript_026712;Transcript_026887;Transcript_028087;Transcript_031657;Transcript_034685;Transcript_035998;Transcript_038148;Transcript_038457;Transcript_040589;Transcript_056474;Tra…
ko00230	Purine_metabolism	52	2.1068e-29	Transcript_005220;Transcript_006512;Transcript_009107;Transcript_014013;Transcript_014463;Transcript_015640;Transcript_015664;Transcript_016072;Transcript_019818;Transcript_021333;Transcript_022623;Transcript_030460;Transcript_031433;Transcript_031916;Transcript_034344;Transcript_037817;Transcript_043127;Transcript_043968;Transcript_045079;Transcript_053238;Transcript_058931;Transcript_065708;Tra…
GO:0005887	C:integral_component_of_plasma_membrane_	51	6.09727e-26	Transcript_005688;Transcript_006005;Transcript_010535;Transcript_011643;Transcript_015361;Transcript_016186;Transcript_017464;Transcript_018878;Transcript_022569;Transcript_025024;Transcript_026099;Transcript_028356;Transcript_028518;Transcript_028824;Transcript_030487;Transcript_034742;Transcript_036388;Transcript_046718;Transcript_051885;Transcript_056316;Transcript_059299;Transcript_078810;Tra…
GO:0005622	C:intracellular_	50	3.27595e-31	Transcript_000872;Transcript_004093;Transcript_004788;Transcript_006397;Transcript_008319;Transcript_009299;Transcript_011606;Transcript_013097;Transcript_022658;Transcript_024167;Transcript_027516;Transcript_028054;Transcript_029780;Transcript_032312;Transcript_035817;Transcript_054038;Transcript_056334;Transcript_069354;Transcript_070575;Transcript_076505;Transcript_080040;Transcript_093409;Tra…
GO:0009414	P:response_to_water_deprivation	50	2.28236e-39	Transcript_001681;Transcript_004819;Transcript_008952;Transcript_009682;Transcript_011753;Transcript_012406;Transcript_018566;Transcript_028226;Transcript_031557;Transcript_032683;Transcript_033391;Transcript_036696;Transcript_038744;Transcript_041464;Transcript_041900;Transcript_042788;Transcript_043650;Transcript_044869;Transcript_050350;Transcript_054604;Transcript_055435;Transcript_055694;Tra…
GO:0008380	P:RNA_splicing	50	1.70673e-26	Transcript_001067;Transcript_001089;Transcript_005281;Transcript_007788;Transcript_008004;Transcript_010789;Transcript_012127;Transcript_012893;Transcript_013457;Transcript_015020;Transcript_017353;Transcript_017354;Transcript_020317;Transcript_020644;Transcript_024473;Transcript_027953;Transcript_028489;Transcript_029813;Transcript_031314;Transcript_035030;Transcript_037655;Transcript_038904;Tra…
GO:0019843	F:rRNA_binding	49	8.50027e-25	Transcript_012726;Transcript_013544;Transcript_013664;Transcript_014654;Transcript_014979;Transcript_017309;Transcript_017394;Transcript_017425;Transcript_018213;Transcript_018528;Transcript_022570;Transcript_027457;Transcript_028122;Transcript_031333;Transcript_031415;Transcript_036406;Transcript_036865;Transcript_039147;Transcript_039345;Transcript_043219;Transcript_065610;Transcript_084424;Tra…
GO:0005507	F:copper_ion_binding	49	7.82894e-22	Transcript_004917;Transcript_005630;Transcript_006390;Transcript_006886;Transcript_007176;Transcript_010192;Transcript_017701;Transcript_017791;Transcript_022039;Transcript_025090;Transcript_025512;Transcript_032550;Transcript_033535;Transcript_044397;Transcript_045079;Transcript_046799;Transcript_047147;Transcript_054604;Transcript_086850;Transcript_096996;Transcript_099444;Transcript_102363;Tra…
GO:0009793	P:embryo_development_ending_in_seed_dormancy	49	4.28052e-33	Transcript_000380;Transcript_001927;Transcript_004067;Transcript_004587;Transcript_007373;Transcript_009113;Transcript_009572;Transcript_010061;Transcript_010654;Transcript_011873;Transcript_014463;Transcript_018602;Transcript_021276;Transcript_024848;Transcript_027199;Transcript_028007;Transcript_029613;Transcript_031147;Transcript_038744;Transcript_040068;Transcript_041585;Transcript_042074;Tra…
GO:0016887	F:ATPase_activity	48	5.11922e-29	Transcript_003919;Transcript_005547;Transcript_007546;Transcript_008054;Transcript_008435;Transcript_013189;Transcript_013587;Transcript_015790;Transcript_017623;Transcript_018681;Transcript_019422;Transcript_020507;Transcript_020812;Transcript_022623;Transcript_025912;Transcript_031964;Transcript_043469;Transcript_047222;Transcript_057704;Transcript_059207;Transcript_065264;Transcript_071966;Tra…
GO:0005856	C:cytoskeleton	47	9.07889e-19	Transcript_002237;Transcript_010535;Transcript_013687;Transcript_013852;Transcript_020276;Transcript_023262;Transcript_023632;Transcript_025469;Transcript_027013;Transcript_027321;Transcript_027685;Transcript_031951;Transcript_034485;Transcript_040632;Transcript_041536;Transcript_041598;Transcript_041869;Transcript_046081;Transcript_046809;Transcript_052601;Transcript_053323;Transcript_075930;Tra…
GO:0031225	C:anchored_component_of_membrane_	47	7.47661e-20	Transcript_007176;Transcript_007601;Transcript_009263;Transcript_010192;Transcript_012826;Transcript_015614;Transcript_019032;Transcript_020158;Transcript_020297;Transcript_023146;Transcript_032949;Transcript_038295;Transcript_042993;Transcript_043543;Transcript_045246;Transcript_053117;Transcript_065976;Transcript_075951;Transcript_098619;Transcript_128269;Transcript_137589;Transcript_138719;Tra…
GO:0055085	P:transmembrane_transport	47	7.63615e-33	Transcript_000645;Transcript_003585;Transcript_006005;Transcript_024398;Transcript_034438;Transcript_041574;Transcript_041670;Transcript_042864;Transcript_054126;Transcript_056123;Transcript_059207;Transcript_066093;Transcript_069915;Transcript_084355;Transcript_089552;Transcript_107059;Transcript_109276;Transcript_119404;Transcript_121350;Transcript_128888;Transcript_149193;Transcript_153826;Tra…
GO:0045454	P:cell_redox_homeostasis	47	2.93273e-23	Transcript_002037;Transcript_006334;Transcript_008733;Transcript_009625;Transcript_009857;Transcript_014164;Transcript_014764;Transcript_015094;Transcript_017048;Transcript_019328;Transcript_020189;Transcript_025384;Transcript_025914;Transcript_029710;Transcript_031666;Transcript_032576;Transcript_032889;Transcript_034152;Transcript_035277;Transcript_037644;Transcript_039350;Transcript_042016;Tra…
GO:0005777	C:peroxisome	47	6.29887e-32	Transcript_005882;Transcript_007119;Transcript_008740;Transcript_009890;Transcript_011381;Transcript_014164;Transcript_015290;Transcript_016081;Transcript_018713;Transcript_020798;Transcript_024852;Transcript_025715;Transcript_028090;Transcript_029830;Transcript_033551;Transcript_042339;Transcript_043723;Transcript_049193;Transcript_052823;Transcript_072738;Transcript_078862;Transcript_090184;Tra…
GO:0043531	F:ADP_binding_	47	4.89558e-22	Transcript_002051;Transcript_006464;Transcript_008560;Transcript_017699;Transcript_024388;Transcript_024590;Transcript_026681;Transcript_031964;Transcript_040857;Transcript_041137;Transcript_044219;Transcript_057163;Transcript_067833;Transcript_072078;Transcript_072413;Transcript_080427;Transcript_089770;Transcript_099819;Transcript_120332;Transcript_121937;Transcript_122683;Transcript_125015;Tra…
ko05010	Alzheimer's_disease	47	1.25002e-25	Transcript_004875;Transcript_005630;Transcript_015263;Transcript_015653;Transcript_016808;Transcript_017791;Transcript_018890;Transcript_019100;Transcript_021261;Transcript_023779;Transcript_024473;Transcript_024930;Transcript_024991;Transcript_028854;Transcript_030924;Transcript_033355;Transcript_036111;Transcript_038425;Transcript_040269;Transcript_041726;Transcript_043006;Transcript_045657;Tra…
GO:0005681	C:spliceosomal_complex	46	2.47085e-21	Transcript_001067;Transcript_005006;Transcript_006686;Transcript_007788;Transcript_010789;Transcript_012893;Transcript_015286;Transcript_017354;Transcript_018681;Transcript_027953;Transcript_028489;Transcript_029813;Transcript_031314;Transcript_035030;Transcript_036386;Transcript_038904;Transcript_044803;Transcript_048788;Transcript_050764;Transcript_055694;Transcript_071548;Transcript_071915;Tra…
GO:0009908	P:flower_development	46	3.53332e-33	Transcript_004587;Transcript_006501;Transcript_007556;Transcript_008035;Transcript_012568;Transcript_024392;Transcript_024492;Transcript_025098;Transcript_027199;Transcript_027421;Transcript_027562;Transcript_031650;Transcript_037235;Transcript_038475;Transcript_041722;Transcript_043194;Transcript_044619;Transcript_052435;Transcript_053346;Transcript_095601;Transcript_096498;Transcript_113812;Tra…
GO:0051287	F:NAD_binding	45	4.71964e-17	Transcript_007249;Transcript_018852;Transcript_024991;Transcript_029726;Transcript_030924;Transcript_031211;Transcript_035652;Transcript_040460;Transcript_041186;Transcript_043006;Transcript_043024;Transcript_044843;Transcript_056416;Transcript_063870;Transcript_081537;Transcript_098084;Transcript_100759;Transcript_100833;Transcript_110053;Transcript_121125;Transcript_126495;Transcript_126758;Tra…
GO:0003743	F:translation_initiation_factor_activity	45	3.10855e-18	Transcript_003355;Transcript_007023;Transcript_009203;Transcript_010897;Transcript_012502;Transcript_025481;Transcript_031321;Transcript_031558;Transcript_031844;Transcript_031853;Transcript_038190;Transcript_038604;Transcript_040561;Transcript_041704;Transcript_043594;Transcript_043672;Transcript_045690;Transcript_071770;Transcript_100799;Transcript_127738;Transcript_132004;Transcript_148091;Tra…
GO:0030154	P:cell_differentiation	45	2.16936e-26	Transcript_006369;Transcript_006501;Transcript_006758;Transcript_009121;Transcript_012532;Transcript_012605;Transcript_024445;Transcript_027421;Transcript_031650;Transcript_035659;Transcript_036738;Transcript_041722;Transcript_042756;Transcript_053308;Transcript_084912;Transcript_085412;Transcript_088475;Transcript_093409;Transcript_101166;Transcript_144829;Transcript_146739;Transcript_149256;Tra…
ko04932	Non-alcoholic_fatty_liver_disease_(NAFLD)	44	2.64708e-20	Transcript_004875;Transcript_005630;Transcript_011423;Transcript_015263;Transcript_016808;Transcript_017791;Transcript_018890;Transcript_021261;Transcript_023779;Transcript_024473;Transcript_024930;Transcript_024991;Transcript_028854;Transcript_033355;Transcript_036111;Transcript_038425;Transcript_040269;Transcript_041704;Transcript_041726;Transcript_042857;Transcript_043006;Transcript_045657;Tra…
ko00240	Pyrimidine_metabolism	44	3.39678e-20	Transcript_006334;Transcript_009107;Transcript_010249;Transcript_014013;Transcript_016072;Transcript_016858;Transcript_019818;Transcript_021333;Transcript_030460;Transcript_031433;Transcript_031916;Transcript_043708;Transcript_043968;Transcript_053238;Transcript_058931;Transcript_063303;Transcript_065708;Transcript_070575;Transcript_076001;Transcript_079006;Transcript_128231;Transcript_166058;Tra…
GO:0006511	P:ubiquitin-dependent_protein_catabolic_process	44	1.20441e-22	Transcript_003383;Transcript_003797;Transcript_008420;Transcript_008592;Transcript_010389;Transcript_013641;Transcript_016705;Transcript_018651;Transcript_019837;Transcript_020594;Transcript_023679;Transcript_024752;Transcript_027923;Transcript_028007;Transcript_030627;Transcript_031938;Transcript_037375;Transcript_041585;Transcript_042322;Transcript_043350;Transcript_046638;Transcript_047479;Tra…
GO:0015979	P:photosynthesis	44	1.15786e-17	Transcript_000495;Transcript_004200;Transcript_007269;Transcript_009113;Transcript_009197;Transcript_014016;Transcript_015584;Transcript_016676;Transcript_020208;Transcript_021310;Transcript_022042;Transcript_023464;Transcript_024848;Transcript_025008;Transcript_025627;Transcript_027262;Transcript_032957;Transcript_034329;Transcript_036696;Transcript_036840;Transcript_037447;Transcript_043135;Tra…
GO:0009579	C:thylakoid	43	1.27393e-19	Transcript_002052;Transcript_004917;Transcript_005103;Transcript_006390;Transcript_014016;Transcript_016676;Transcript_020208;Transcript_022039;Transcript_023351;Transcript_025627;Transcript_028942;Transcript_034963;Transcript_036840;Transcript_039277;Transcript_042319;Transcript_042701;Transcript_047691;Transcript_051630;Transcript_052435;Transcript_060667;Transcript_065295;Transcript_100629;Tra…
GO:0006096	P:glycolytic_process	43	1.27393e-19	Transcript_005220;Transcript_006512;Transcript_009113;Transcript_013311;Transcript_015664;Transcript_018566;Transcript_018771;Transcript_021956;Transcript_023260;Transcript_024848;Transcript_027666;Transcript_029327;Transcript_030924;Transcript_034153;Transcript_036578;Transcript_037817;Transcript_043127;Transcript_043541;Transcript_046002;Transcript_047367;Transcript_089972;Transcript_090309;Tra…
GO:0005615	C:extracellular_space_	43	1.38847e-33	Transcript_001725;Transcript_006096;Transcript_007287;Transcript_011987;Transcript_013002;Transcript_023489;Transcript_026440;Transcript_029202;Transcript_029514;Transcript_032154;Transcript_038930;Transcript_040769;Transcript_042132;Transcript_049359;Transcript_064646;Transcript_065407;Transcript_066913;Transcript_077393;Transcript_092515;Transcript_094331;Transcript_113945;Transcript_151747;Tra…
ko04075	Plant_hormone_signal_transduction	43	7.66574e-39	Transcript_001478;Transcript_003795;Transcript_007314;Transcript_007763;Transcript_014041;Transcript_014614;Transcript_018597;Transcript_023629;Transcript_030947;Transcript_033045;Transcript_043997;Transcript_044178;Transcript_046638;Transcript_050482;Transcript_068534;Transcript_097240;Transcript_102894;Transcript_121996;Transcript_139256;Transcript_144757;Transcript_149594;Transcript_152716;Tra…
GO:0006470	P:protein_dephosphorylation	42	1.60527e-24	Transcript_005103;Transcript_006352;Transcript_009742;Transcript_015425;Transcript_017226;Transcript_020301;Transcript_022802;Transcript_029928;Transcript_030591;Transcript_039758;Transcript_042622;Transcript_043524;Transcript_043946;Transcript_047441;Transcript_048067;Transcript_058810;Transcript_059763;Transcript_086985;Transcript_095402;Transcript_116003;Transcript_119628;Transcript_150580;Tra…
ko00010	Glycolysis_/_Gluconeogenesis	42	1.58197e-19	Transcript_005220;Transcript_006512;Transcript_007351;Transcript_008664;Transcript_013311;Transcript_015664;Transcript_017955;Transcript_018566;Transcript_018771;Transcript_023260;Transcript_027666;Transcript_030924;Transcript_034153;Transcript_036578;Transcript_037817;Transcript_043127;Transcript_046002;Transcript_047367;Transcript_089972;Transcript_091033;Transcript_104492;Transcript_132262;Tra…
GO:0006633	P:fatty_acid_biosynthetic_process	42	2.58814e-26	Transcript_005449;Transcript_006151;Transcript_006968;Transcript_010061;Transcript_013456;Transcript_017015;Transcript_017408;Transcript_017588;Transcript_017832;Transcript_023647;Transcript_024414;Transcript_026535;Transcript_028562;Transcript_028726;Transcript_037789;Transcript_045908;Transcript_049793;Transcript_052099;Transcript_074033;Transcript_080382;Transcript_090548;Transcript_114161;Tra…
GO:0008289	F:lipid_binding_	41	7.67653e-19	Transcript_000483;Transcript_005776;Transcript_007960;Transcript_014306;Transcript_016873;Transcript_018454;Transcript_028562;Transcript_030597;Transcript_031010;Transcript_031964;Transcript_039901;Transcript_045306;Transcript_046962;Transcript_047275;Transcript_052555;Transcript_077103;Transcript_081670;Transcript_093059;Transcript_094627;Transcript_103617;Transcript_113945;Transcript_126816;Tra…
GO:0006468	P:protein_phosphorylation	41	1.93352e-23	Transcript_004120;Transcript_004316;Transcript_012490;Transcript_014297;Transcript_016397;Transcript_018544;Transcript_018602;Transcript_019423;Transcript_019676;Transcript_023198;Transcript_023931;Transcript_024241;Transcript_024426;Transcript_028243;Transcript_031193;Transcript_033079;Transcript_033297;Transcript_040863;Transcript_040935;Transcript_041825;Transcript_070575;Transcript_087118;Tra…
ko05203	Viral_carcinogenesis	41	3.6191e-22	Transcript_002009;Transcript_003398;Transcript_004120;Transcript_004938;Transcript_005220;Transcript_006512;Transcript_010969;Transcript_011139;Transcript_011770;Transcript_015336;Transcript_015664;Transcript_016618;Transcript_016807;Transcript_019957;Transcript_024392;Transcript_027594;Transcript_036517;Transcript_037817;Transcript_041381;Transcript_042195;Transcript_042857;Transcript_043127;Tra…
GO:0022626	C:cytosolic_ribosome	41	1.37672e-24	Transcript_006390;Transcript_007527;Transcript_014642;Transcript_014979;Transcript_016448;Transcript_016668;Transcript_016794;Transcript_025794;Transcript_026238;Transcript_031909;Transcript_034011;Transcript_037791;Transcript_040950;Transcript_041532;Transcript_041939;Transcript_043724;Transcript_047515;Transcript_064290;Transcript_089724;Transcript_108895;Transcript_128594;Transcript_130590;Tra…
GO:0005215	F:transporter_activity	41	7.83182e-25	Transcript_000380;Transcript_006721;Transcript_008658;Transcript_013189;Transcript_015003;Transcript_017251;Transcript_017673;Transcript_021365;Transcript_029230;Transcript_030787;Transcript_034438;Transcript_040125;Transcript_041574;Transcript_046352;Transcript_048413;Transcript_065264;Transcript_075322;Transcript_084355;Transcript_089552;Transcript_098873;Transcript_106699;Transcript_108812;Tra…
GO:0006810	P:transport	41	5.2254e-32	Transcript_000380;Transcript_008435;Transcript_011299;Transcript_014306;Transcript_016873;Transcript_018454;Transcript_021788;Transcript_027548;Transcript_031150;Transcript_034963;Transcript_042022;Transcript_047275;Transcript_049359;Transcript_054137;Transcript_062246;Transcript_063870;Transcript_065264;Transcript_081088;Transcript_104892;Transcript_108137;Transcript_109276;Transcript_144026;Tra…
GO:0009524	C:phragmoplast	40	3.18135e-16	Transcript_003962;Transcript_010535;Transcript_024752;Transcript_027013;Transcript_027923;Transcript_034485;Transcript_034795;Transcript_037116;Transcript_040068;Transcript_041598;Transcript_042567;Transcript_052601;Transcript_053053;Transcript_053323;Transcript_064290;Transcript_081307;Transcript_097854;Transcript_102607;Transcript_105213;Transcript_122174;Transcript_142757;Transcript_146566;Tra…
GO:0031969	C:chloroplast_membrane_	40	9.91612e-21	Transcript_008620;Transcript_008627;Transcript_008658;Transcript_008835;Transcript_015003;Transcript_015968;Transcript_015976;Transcript_017531;Transcript_027868;Transcript_028443;Transcript_029246;Transcript_029726;Transcript_034742;Transcript_043012;Transcript_043427;Transcript_046674;Transcript_049793;Transcript_050781;Transcript_063396;Transcript_064376;Transcript_065706;Transcript_086016;Tra…
GO:0009555	P:pollen_development	40	2.03057e-17	Transcript_001927;Transcript_002525;Transcript_010331;Transcript_010535;Transcript_011900;Transcript_013605;Transcript_018389;Transcript_023111;Transcript_024725;Transcript_035006;Transcript_041186;Transcript_041983;Transcript_047623;Transcript_063879;Transcript_112949;Transcript_130140;Transcript_151606;Transcript_152682;Transcript_160093;Transcript_169676;Transcript_174497;Transcript_186273;Tra…
GO:0006897	P:endocytosis	39	4.53342e-12	Transcript_003176;Transcript_007188;Transcript_007592;Transcript_010535;Transcript_014357;Transcript_014566;Transcript_014631;Transcript_014860;Transcript_016371;Transcript_025702;Transcript_028467;Transcript_033544;Transcript_035369;Transcript_039901;Transcript_041385;Transcript_042270;Transcript_042674;Transcript_043347;Transcript_045744;Transcript_048879;Transcript_098689;Transcript_151294;Tra…
GO:0042742	P:defense_response_to_bacterium	39	5.83745e-47	Transcript_004917;Transcript_014357;Transcript_014471;Transcript_015927;Transcript_018237;Transcript_020798;Transcript_022039;Transcript_027419;Transcript_028361;Transcript_028467;Transcript_033045;Transcript_043650;Transcript_043997;Transcript_044108;Transcript_053332;Transcript_053538;Transcript_060667;Transcript_060815;Transcript_065706;Transcript_083547;Transcript_089770;Transcript_121937;Tra…
GO:0007067	P:mitotic_nuclear_division	39	4.8816e-23	Transcript_006688;Transcript_007752;Transcript_007763;Transcript_011770;Transcript_014745;Transcript_023157;Transcript_030766;Transcript_032610;Transcript_033297;Transcript_033497;Transcript_037116;Transcript_041381;Transcript_042567;Transcript_043524;Transcript_053053;Transcript_070575;Transcript_074422;Transcript_097854;Transcript_105213;Transcript_105951;Transcript_117006;Transcript_143107;Tra…
GO:0004190	F:aspartic-type_endopeptidase_activity_	39	1.07329e-27	Transcript_002866;Transcript_004819;Transcript_006471;Transcript_009909;Transcript_011520;Transcript_012036;Transcript_023633;Transcript_025591;Transcript_032060;Transcript_032348;Transcript_034096;Transcript_050291;Transcript_052646;Transcript_061939;Transcript_069093;Transcript_084140;Transcript_090961;Transcript_092704;Transcript_093012;Transcript_125911;Transcript_133159;Transcript_137032;Tra…
GO:0009055	F:electron_carrier_activity	39	2.07109e-19	Transcript_004875;Transcript_012826;Transcript_019202;Transcript_019328;Transcript_020209;Transcript_032889;Transcript_038425;Transcript_042016;Transcript_042993;Transcript_043170;Transcript_044747;Transcript_048440;Transcript_071446;Transcript_072738;Transcript_081088;Transcript_095194;Transcript_102388;Transcript_106807;Transcript_118013;Transcript_152903;Transcript_155513;Transcript_158464;Tra…
GO:0007049	P:cell_cycle_	38	8.15775e-31	Transcript_000103;Transcript_007314;Transcript_016024;Transcript_016217;Transcript_016279;Transcript_016873;Transcript_018454;Transcript_018886;Transcript_019957;Transcript_025455;Transcript_025715;Transcript_031675;Transcript_036750;Transcript_037258;Transcript_042756;Transcript_052601;Transcript_064290;Transcript_072481;Transcript_081307;Transcript_084912;Transcript_121475;Transcript_122174;Tra…
GO:0004252	F:serine-type_endopeptidase_activity	38	6.16332e-20	Transcript_007287;Transcript_007408;Transcript_014313;Transcript_016761;Transcript_021946;Transcript_025157;Transcript_029281;Transcript_030038;Transcript_034536;Transcript_035958;Transcript_040106;Transcript_040769;Transcript_042132;Transcript_042324;Transcript_044131;Transcript_047691;Transcript_049174;Transcript_060720;Transcript_066913;Transcript_068703;Transcript_071384;Transcript_075306;Tra…
GO:0043161	P:proteasome-mediated_ubiquitin-dependent_protein_catabolic_process	38	1.05749e-19	Transcript_002519;Transcript_005328;Transcript_007164;Transcript_007808;Transcript_008592;Transcript_008952;Transcript_012117;Transcript_012328;Transcript_016053;Transcript_016835;Transcript_020594;Transcript_020907;Transcript_026804;Transcript_030639;Transcript_031840;Transcript_031964;Transcript_041803;Transcript_041900;Transcript_048992;Transcript_058742;Transcript_059234;Transcript_074340;Tra…
GO:0009534	C:chloroplast_thylakoid	38	1.06742e-21	Transcript_014016;Transcript_016676;Transcript_020208;Transcript_021946;Transcript_023351;Transcript_025157;Transcript_025627;Transcript_028942;Transcript_029246;Transcript_029445;Transcript_034963;Transcript_036840;Transcript_039277;Transcript_042701;Transcript_044131;Transcript_047691;Transcript_051581;Transcript_051630;Transcript_060667;Transcript_065295;Transcript_068703;Transcript_092531;Tra…
ko04146	Peroxisome	37	7.10315e-15	Transcript_004033;Transcript_007440;Transcript_010979;Transcript_012770;Transcript_013218;Transcript_015290;Transcript_015934;Transcript_016685;Transcript_020798;Transcript_028090;Transcript_028424;Transcript_030742;Transcript_033551;Transcript_042339;Transcript_049193;Transcript_052823;Transcript_091674;Transcript_095194;Transcript_095395;Transcript_114161;Transcript_115130;Transcript_160618;Tra…
GO:0009611	P:response_to_wounding	37	2.44204e-27	Transcript_001681;Transcript_008952;Transcript_009299;Transcript_012470;Transcript_016906;Transcript_018237;Transcript_023629;Transcript_033045;Transcript_036696;Transcript_041900;Transcript_043997;Transcript_047222;Transcript_047623;Transcript_053375;Transcript_056334;Transcript_065706;Transcript_068534;Transcript_085954;Transcript_094325;Transcript_103871;Transcript_108142;Transcript_121996;Tra…
GO:0045893	P:positive_regulation_of_transcription,_DNA-templated	37	1.4587e-34	Transcript_006542;Transcript_009846;Transcript_015301;Transcript_016829;Transcript_019691;Transcript_026330;Transcript_027562;Transcript_030766;Transcript_032257;Transcript_035659;Transcript_042738;Transcript_043998;Transcript_044209;Transcript_044869;Transcript_047958;Transcript_050350;Transcript_053341;Transcript_055024;Transcript_058742;Transcript_068721;Transcript_069802;Transcript_069820;Tra…
GO:0050660	F:flavin_adenine_dinucleotide_binding	37	2.12097e-22	Transcript_001093;Transcript_006334;Transcript_008733;Transcript_009263;Transcript_012178;Transcript_014164;Transcript_016081;Transcript_016663;Transcript_030980;Transcript_031050;Transcript_033355;Transcript_072738;Transcript_082723;Transcript_093527;Transcript_095144;Transcript_095194;Transcript_101286;Transcript_110295;Transcript_126589;Transcript_132945;Transcript_136647;Transcript_143038;Tra…
ko05168	Herpes_simplex_infection	37	1.64197e-11	Transcript_003398;Transcript_004120;Transcript_004938;Transcript_007788;Transcript_010389;Transcript_010789;Transcript_016807;Transcript_017353;Transcript_023681;Transcript_024392;Transcript_024752;Transcript_027923;Transcript_028007;Transcript_037076;Transcript_037655;Transcript_040271;Transcript_041585;Transcript_041704;Transcript_042195;Transcript_043524;Transcript_047441;Transcript_071915;Tra…
GO:0016568	P:chromatin_modification	36	4.40245e-11	Transcript_007485;Transcript_011753;Transcript_014890;Transcript_015634;Transcript_016829;Transcript_020317;Transcript_021459;Transcript_021469;Transcript_022788;Transcript_032228;Transcript_035517;Transcript_036517;Transcript_043195;Transcript_046588;Transcript_056493;Transcript_057199;Transcript_057767;Transcript_062005;Transcript_071500;Transcript_083500;Transcript_088760;Transcript_096701;Tra…
GO:0009733	P:response_to_auxin	36	5.2751e-27	Transcript_001478;Transcript_011220;Transcript_012490;Transcript_019049;Transcript_031196;Transcript_032683;Transcript_035564;Transcript_035857;Transcript_037235;Transcript_041388;Transcript_043650;Transcript_044430;Transcript_053346;Transcript_059679;Transcript_066093;Transcript_080300;Transcript_096112;Transcript_096498;Transcript_101040;Transcript_108142;Transcript_133564;Transcript_139256;Tra…
GO:0000502	C:proteasome_complex	36	1.44199e-16	Transcript_002050;Transcript_002519;Transcript_011546;Transcript_013419;Transcript_015380;Transcript_016835;Transcript_020907;Transcript_025775;Transcript_026804;Transcript_031964;Transcript_045010;Transcript_048992;Transcript_061441;Transcript_071966;Transcript_084750;Transcript_129307;Transcript_133564;Transcript_142573;Transcript_174497;Transcript_184735;Transcript_185795;Transcript_186885;Tra…
ko03015	mRNA_surveillance_pathway	35	3.59638e-23	Transcript_007119;Transcript_007788;Transcript_008117;Transcript_008779;Transcript_015425;Transcript_023681;Transcript_025855;Transcript_028118;Transcript_031943;Transcript_032830;Transcript_033998;Transcript_035131;Transcript_042932;Transcript_043524;Transcript_043723;Transcript_043984;Transcript_047178;Transcript_047441;Transcript_048788;Transcript_079199;Transcript_095402;Transcript_100799;Tra…
ko04152	AMPK_signaling_pathway	35	3.90373e-16	Transcript_007119;Transcript_008748;Transcript_008779;Transcript_011423;Transcript_013311;Transcript_015425;Transcript_017829;Transcript_019957;Transcript_021276;Transcript_023198;Transcript_028243;Transcript_034153;Transcript_036578;Transcript_043723;Transcript_058816;Transcript_062178;Transcript_063511;Transcript_079199;Transcript_091033;Transcript_095402;Transcript_139716;Transcript_156614;Tra…
GO:0016757	F:transferase_activity,_transferring_glycosyl_groups_	35	3.11318e-20	Transcript_001446;Transcript_001576;Transcript_004498;Transcript_004851;Transcript_010204;Transcript_015340;Transcript_016927;Transcript_019335;Transcript_021222;Transcript_022980;Transcript_030209;Transcript_033866;Transcript_035237;Transcript_036445;Transcript_041320;Transcript_042756;Transcript_046042;Transcript_071965;Transcript_084912;Transcript_087796;Transcript_088311;Transcript_104797;Tra…
GO:0046658	C:anchored_component_of_plasma_membrane	35	1.12996e-14	Transcript_007176;Transcript_007601;Transcript_010192;Transcript_012826;Transcript_014370;Transcript_015614;Transcript_018014;Transcript_020297;Transcript_023146;Transcript_038295;Transcript_042993;Transcript_053117;Transcript_098619;Transcript_128241;Transcript_128269;Transcript_161508;Transcript_162265;Transcript_169479;Transcript_175974;Transcript_188290;Transcript_193728;Transcript_197339;Tra…
GO:0009408	P:response_to_heat	35	5.71367e-29	Transcript_013610;Transcript_018566;Transcript_020969;Transcript_026698;Transcript_028700;Transcript_029180;Transcript_038190;Transcript_040010;Transcript_044869;Transcript_045887;Transcript_046510;Transcript_053375;Transcript_053891;Transcript_059679;Transcript_067779;Transcript_069946;Transcript_071807;Transcript_084466;Transcript_085015;Transcript_115044;Transcript_121580;Transcript_133564;Tra…
GO:0042802	F:identical_protein_binding	34	8.77593e-20	Transcript_001478;Transcript_006334;Transcript_009033;Transcript_009468;Transcript_010715;Transcript_015290;Transcript_017135;Transcript_018602;Transcript_019423;Transcript_025715;Transcript_043708;Transcript_044178;Transcript_050764;Transcript_056416;Transcript_061583;Transcript_064290;Transcript_077629;Transcript_082806;Transcript_098798;Transcript_153014;Transcript_153903;Transcript_158442;Tra…
GO:0040008	P:regulation_of_growth	34	1.37736e-12	Transcript_001759;Transcript_003646;Transcript_007752;Transcript_008117;Transcript_016952;Transcript_017992;Transcript_018597;Transcript_019060;Transcript_021276;Transcript_021469;Transcript_022623;Transcript_022788;Transcript_028530;Transcript_030486;Transcript_035131;Transcript_040106;Transcript_042756;Transcript_043876;Transcript_069251;Transcript_072542;Transcript_080208;Transcript_084912;Tra…
ko03050	Proteasome	34	2.14016e-16	Transcript_002050;Transcript_002519;Transcript_005328;Transcript_009434;Transcript_012328;Transcript_013419;Transcript_016053;Transcript_020907;Transcript_023679;Transcript_025775;Transcript_041803;Transcript_061441;Transcript_071966;Transcript_084750;Transcript_133564;Transcript_142573;Transcript_153990;Transcript_160414;Transcript_165401;Transcript_174497;Transcript_189492;Transcript_192076;Tra…
GO:0006364	P:rRNA_processing	33	8.85705e-23	Transcript_001711;Transcript_007852;Transcript_009033;Transcript_029613;Transcript_029813;Transcript_032764;Transcript_035516;Transcript_035659;Transcript_038940;Transcript_040637;Transcript_044209;Transcript_045092;Transcript_053224;Transcript_064788;Transcript_072702;Transcript_089564;Transcript_091642;Transcript_127448;Transcript_134784;Transcript_152113;Transcript_152398;Transcript_156758;Tra…
GO:0016042	P:lipid_catabolic_process	33	1.66647e-24	Transcript_004067;Transcript_023455;Transcript_026440;Transcript_031577;Transcript_032056;Transcript_038313;Transcript_042858;Transcript_045780;Transcript_050096;Transcript_058742;Transcript_096354;Transcript_102735;Transcript_126565;Transcript_128738;Transcript_129190;Transcript_159486;Transcript_161330;Transcript_179910;Transcript_186738;Transcript_193198;Transcript_195679;Transcript_196913;Tra…
GO:0009873	P:ethylene-activated_signaling_pathway	33	1.6829e-28	Transcript_004093;Transcript_005368;Transcript_006476;Transcript_017829;Transcript_022412;Transcript_023455;Transcript_024752;Transcript_027923;Transcript_028007;Transcript_028361;Transcript_037316;Transcript_041585;Transcript_046638;Transcript_060815;Transcript_097126;Transcript_105439;Transcript_108050;Transcript_132877;Transcript_139716;Transcript_177798;Transcript_180384;Transcript_197819;Tra…
GO:0016311	P:dephosphorylation	33	8.9702e-14	Transcript_005103;Transcript_010467;Transcript_016492;Transcript_022710;Transcript_025105;Transcript_028828;Transcript_028942;Transcript_030019;Transcript_034742;Transcript_044878;Transcript_049193;Transcript_053238;Transcript_103216;Transcript_149112;Transcript_154853;Transcript_155584;Transcript_158442;Transcript_160090;Transcript_164814;Transcript_179420;Transcript_183707;Transcript_188373;Tra…
GO:0009738	P:abscisic_acid-activated_signaling_pathway	33	3.37547e-35	Transcript_004316;Transcript_014764;Transcript_021004;Transcript_023455;Transcript_028795;Transcript_029215;Transcript_034176;Transcript_038744;Transcript_042756;Transcript_043650;Transcript_046627;Transcript_047623;Transcript_083718;Transcript_093409;Transcript_094065;Transcript_118043;Transcript_119865;Transcript_135343;Transcript_144757;Transcript_150515;Transcript_152263;Transcript_162934;Tra…
ko04145	Phagosome	33	9.84581e-21	Transcript_000872;Transcript_008257;Transcript_009551;Transcript_010331;Transcript_012650;Transcript_014408;Transcript_016602;Transcript_024398;Transcript_028670;Transcript_030029;Transcript_037452;Transcript_041983;Transcript_042857;Transcript_044726;Transcript_073956;Transcript_088161;Transcript_096467;Transcript_103380;Transcript_109160;Transcript_141684;Transcript_161256;Transcript_183515;Tra…
ko04110	Cell_cycle	33	6.47395e-23	Transcript_003398;Transcript_006688;Transcript_010389;Transcript_011139;Transcript_011770;Transcript_016618;Transcript_016807;Transcript_019957;Transcript_024392;Transcript_024752;Transcript_027594;Transcript_027923;Transcript_028007;Transcript_033497;Transcript_036517;Transcript_041381;Transcript_041585;Transcript_042195;Transcript_045071;Transcript_065669;Transcript_072481;Transcript_094306;Tra…
ko03008	Ribosome_biogenesis_in_eukaryotes	33	1.90265e-17	Transcript_006150;Transcript_022623;Transcript_029813;Transcript_038940;Transcript_040561;Transcript_044359;Transcript_052601;Transcript_080208;Transcript_081307;Transcript_089564;Transcript_099194;Transcript_100674;Transcript_116719;Transcript_150136;Transcript_152398;Transcript_153138;Transcript_157447;Transcript_159420;Transcript_162607;Transcript_176055;Transcript_188900;Transcript_192735;Tra…
GO:0048364	P:root_development	33	5.7711e-16	Transcript_005776;Transcript_008600;Transcript_015634;Transcript_031196;Transcript_039009;Transcript_078810;Transcript_088168;Transcript_104987;Transcript_129190;Transcript_131665;Transcript_164508;Transcript_165034;Transcript_168530;Transcript_193892;Transcript_201458;Transcript_205967;Transcript_206885;Transcript_209704;Transcript_212311;Transcript_216653;Transcript_218401;Transcript_222250;Tra…
GO:0007165	P:signal_transduction	32	5.51197e-25	Transcript_004839;Transcript_007119;Transcript_008779;Transcript_010386;Transcript_011423;Transcript_013097;Transcript_024167;Transcript_024653;Transcript_028297;Transcript_028824;Transcript_028828;Transcript_031193;Transcript_035055;Transcript_035369;Transcript_037488;Transcript_040857;Transcript_041613;Transcript_043723;Transcript_085174;Transcript_089770;Transcript_094022;Transcript_095402;Tra…
ko00564	Glycerophospholipid_metabolism	32	1.72454e-17	Transcript_004067;Transcript_005080;Transcript_009246;Transcript_012368;Transcript_016010;Transcript_017685;Transcript_018828;Transcript_023455;Transcript_024269;Transcript_029406;Transcript_029762;Transcript_031211;Transcript_031577;Transcript_036298;Transcript_038038;Transcript_039626;Transcript_042453;Transcript_048279;Transcript_059666;Transcript_062267;Transcript_073742;Transcript_102735;Tra…
GO:0005759	C:mitochondrial_matrix_	32	1.66974e-25	Transcript_000781;Transcript_010158;Transcript_030915;Transcript_032437;Transcript_040630;Transcript_044038;Transcript_044282;Transcript_045618;Transcript_059207;Transcript_059679;Transcript_068373;Transcript_091308;Transcript_096851;Transcript_104035;Transcript_132262;Transcript_136647;Transcript_149735;Transcript_155782;Transcript_165898;Transcript_184559;Transcript_193351;Transcript_195589;Tra…
GO:0051539	F:4_iron,_4_sulfur_cluster_binding	32	1.27145e-15	Transcript_015584;Transcript_016808;Transcript_017186;Transcript_019591;Transcript_024991;Transcript_042282;Transcript_043006;Transcript_067779;Transcript_082537;Transcript_090030;Transcript_093232;Transcript_139464;Transcript_144874;Transcript_149537;Transcript_151382;Transcript_155782;Transcript_168654;Transcript_177527;Transcript_187104;Transcript_191805;Transcript_195589;Transcript_198214;Tra…
GO:0045892	P:negative_regulation_of_transcription,_DNA-templated	32	1.20096e-19	Transcript_001478;Transcript_016456;Transcript_016829;Transcript_020316;Transcript_020795;Transcript_028211;Transcript_029817;Transcript_031196;Transcript_032830;Transcript_036517;Transcript_036696;Transcript_038744;Transcript_041662;Transcript_043195;Transcript_043491;Transcript_059088;Transcript_087038;Transcript_099676;Transcript_101332;Transcript_149849;Transcript_158761;Transcript_167400;Tra…
GO:0000398	P:mRNA_splicing,_via_spliceosome	32	1.81089e-22	Transcript_005006;Transcript_006686;Transcript_009033;Transcript_010789;Transcript_013999;Transcript_014745;Transcript_018681;Transcript_035258;Transcript_038904;Transcript_042738;Transcript_042932;Transcript_044803;Transcript_050764;Transcript_069308;Transcript_071915;Transcript_126907;Transcript_129755;Transcript_143454;Transcript_150591;Transcript_156971;Transcript_183966;Transcript_197498;Tra…
ko04142	Lysosome	32	1.90044e-13	Transcript_006096;Transcript_008058;Transcript_008082;Transcript_009551;Transcript_014047;Transcript_014860;Transcript_016492;Transcript_016602;Transcript_021879;Transcript_023633;Transcript_028670;Transcript_030029;Transcript_041445;Transcript_042164;Transcript_052646;Transcript_109625;Transcript_117260;Transcript_130095;Transcript_137032;Transcript_151294;Transcript_175406;Transcript_183515;Tra…
GO:0004386	F:helicase_activity	32	6.96724e-19	Transcript_000719;Transcript_012222;Transcript_021469;Transcript_022788;Transcript_031844;Transcript_035030;Transcript_037258;Transcript_039455;Transcript_042553;Transcript_042738;Transcript_043594;Transcript_045092;Transcript_045690;Transcript_046588;Transcript_066556;Transcript_074719;Transcript_093342;Transcript_096701;Transcript_102338;Transcript_132265;Transcript_139660;Transcript_165031;Tra…
GO:0016607	C:nuclear_speck	31	4.89296e-16	Transcript_006686;Transcript_010789;Transcript_012893;Transcript_014392;Transcript_015020;Transcript_020317;Transcript_020644;Transcript_027953;Transcript_028118;Transcript_031314;Transcript_033297;Transcript_036386;Transcript_038904;Transcript_044803;Transcript_045243;Transcript_053538;Transcript_053673;Transcript_071915;Transcript_076061;Transcript_087812;Transcript_112168;Transcript_150591;Tra…
GO:0008565	F:protein_transporter_activity	31	7.6998e-14	Transcript_002222;Transcript_002727;Transcript_014839;Transcript_016204;Transcript_018689;Transcript_020179;Transcript_026351;Transcript_031641;Transcript_036659;Transcript_036921;Transcript_037534;Transcript_039901;Transcript_045142;Transcript_090283;Transcript_111054;Transcript_113011;Transcript_144287;Transcript_158767;Transcript_160433;Transcript_180120;Transcript_189851;Transcript_192887;Tra…
GO:0050832	P:defense_response_to_fungus	31	1.16991e-29	Transcript_001711;Transcript_005461;Transcript_006062;Transcript_008011;Transcript_033045;Transcript_043650;Transcript_043997;Transcript_056334;Transcript_056735;Transcript_065706;Transcript_083601;Transcript_097126;Transcript_103871;Transcript_122174;Transcript_152123;Transcript_152770;Transcript_156609;Transcript_173840;Transcript_186229;Transcript_186273;Transcript_188653;Transcript_201646;Tra…
GO:0006629	P:lipid_metabolic_process	31	4.36011e-14	Transcript_005220;Transcript_005683;Transcript_011520;Transcript_014370;Transcript_015290;Transcript_015934;Transcript_018828;Transcript_023146;Transcript_028562;Transcript_029762;Transcript_031349;Transcript_045385;Transcript_048279;Transcript_059666;Transcript_074778;Transcript_128241;Transcript_147952;Transcript_156803;Transcript_162265;Transcript_173237;Transcript_173780;Transcript_177019;Tra…
GO:0004722	F:protein_serine/threonine_phosphatase_activity	31	2.08638e-24	Transcript_005103;Transcript_006352;Transcript_017226;Transcript_020301;Transcript_022802;Transcript_030591;Transcript_039758;Transcript_042622;Transcript_043524;Transcript_047441;Transcript_048067;Transcript_058810;Transcript_059763;Transcript_086985;Transcript_116003;Transcript_119628;Transcript_151638;Transcript_168665;Transcript_171084;Transcript_187373;Transcript_193374;Transcript_197963;Tra…
GO:0009626	P:plant-type_hypersensitive_response	30	1.10211e-20	Transcript_003510;Transcript_006464;Transcript_017699;Transcript_020740;Transcript_026681;Transcript_040332;Transcript_047623;Transcript_053538;Transcript_057163;Transcript_059679;Transcript_075256;Transcript_075498;Transcript_099819;Transcript_120332;Transcript_122683;Transcript_138452;Transcript_142815;Transcript_151175;Transcript_157208;Transcript_173413;Transcript_179880;Transcript_185876;Tra…
ko03018	RNA_degradation	30	1.8446e-30	Transcript_001089;Transcript_001387;Transcript_009033;Transcript_013311;Transcript_016668;Transcript_023260;Transcript_034153;Transcript_034257;Transcript_036578;Transcript_044789;Transcript_053332;Transcript_055694;Transcript_066186;Transcript_072702;Transcript_091033;Transcript_100799;Transcript_112846;Transcript_124311;Transcript_146024;Transcript_152113;Transcript_155544;Transcript_162607;Tra…
GO:0015293	F:symporter_activity	30	2.29905e-14	Transcript_006005;Transcript_008034;Transcript_008298;Transcript_009044;Transcript_009106;Transcript_012470;Transcript_014614;Transcript_016186;Transcript_016906;Transcript_018520;Transcript_022464;Transcript_027489;Transcript_030947;Transcript_035838;Transcript_038170;Transcript_042788;Transcript_044324;Transcript_050253;Transcript_053129;Transcript_085884;Transcript_116931;Transcript_140331;Tra…
ko00620	Pyruvate_metabolism	30	1.10211e-20	Transcript_005220;Transcript_006512;Transcript_015664;Transcript_017072;Transcript_028726;Transcript_037817;Transcript_043024;Transcript_043127;Transcript_059044;Transcript_077772;Transcript_080382;Transcript_090548;Transcript_121125;Transcript_132262;Transcript_136647;Transcript_136668;Transcript_151724;Transcript_159333;Transcript_186303;Transcript_189036;Transcript_193456;Transcript_206114;Tra…
GO:0070469	C:respiratory_chain	30	6.48406e-13	Transcript_001489;Transcript_005630;Transcript_015693;Transcript_017791;Transcript_020209;Transcript_028203;Transcript_031552;Transcript_032550;Transcript_043170;Transcript_062205;Transcript_074033;Transcript_090672;Transcript_102388;Transcript_104017;Transcript_139464;Transcript_158464;Transcript_158785;Transcript_164259;Transcript_164716;Transcript_165898;Transcript_171030;Transcript_190023;Tra…
ko04114	Oocyte_meiosis	29	1.40337e-19	Transcript_006688;Transcript_007119;Transcript_010389;Transcript_011770;Transcript_015425;Transcript_016618;Transcript_023681;Transcript_024752;Transcript_027594;Transcript_027923;Transcript_028007;Transcript_033497;Transcript_041381;Transcript_041585;Transcript_043524;Transcript_043723;Transcript_047441;Transcript_047623;Transcript_079199;Transcript_105439;Transcript_143107;Transcript_145801;Tra…
GO:0016032	P:viral_process	29	1.59661e-14	Transcript_002727;Transcript_014357;Transcript_023198;Transcript_024752;Transcript_026774;Transcript_027923;Transcript_028007;Transcript_028243;Transcript_028467;Transcript_041585;Transcript_043491;Transcript_043594;Transcript_045079;Transcript_059207;Transcript_100799;Transcript_105439;Transcript_108137;Transcript_111457;Transcript_179460;Transcript_182793;Transcript_186885;Transcript_194665;Tra…
GO:0022625	C:cytosolic_large_ribosomal_subunit	29	7.27042e-23	Transcript_014103;Transcript_014642;Transcript_016448;Transcript_019318;Transcript_026238;Transcript_026774;Transcript_037375;Transcript_042410;Transcript_045453;Transcript_050481;Transcript_061766;Transcript_064900;Transcript_108895;Transcript_124219;Transcript_128594;Transcript_130590;Transcript_138047;Transcript_155629;Transcript_171107;Transcript_192000;Transcript_203723;Transcript_208486;Tra…
ko04626	Plant-pathogen_interaction	29	2.2024e-32	Transcript_004260;Transcript_009890;Transcript_014471;Transcript_014712;Transcript_015701;Transcript_017464;Transcript_021004;Transcript_022515;Transcript_023790;Transcript_027116;Transcript_036983;Transcript_040863;Transcript_041980;Transcript_043290;Transcript_111101;Transcript_130943;Transcript_149560;Transcript_152770;Transcript_159386;Transcript_166148;Transcript_166369;Transcript_169979;Tra…
GO:0006887	P:exocytosis	29	7.12534e-09	Transcript_012881;Transcript_016956;Transcript_017157;Transcript_022427;Transcript_023362;Transcript_027013;Transcript_029611;Transcript_034485;Transcript_037452;Transcript_038952;Transcript_053323;Transcript_069330;Transcript_077148;Transcript_086729;Transcript_090487;Transcript_102607;Transcript_114811;Transcript_140313;Transcript_142757;Transcript_155836;Transcript_175654;Transcript_189744;Tra…
GO:0030529	C:ribonucleoprotein_complex	28	3.05946e-10	Transcript_005521;Transcript_007752;Transcript_013435;Transcript_026077;Transcript_026330;Transcript_032764;Transcript_040637;Transcript_042834;Transcript_078783;Transcript_079355;Transcript_091990;Transcript_129604;Transcript_139020;Transcript_149646;Transcript_156668;Transcript_165151;Transcript_176851;Transcript_182033;Transcript_183059;Transcript_184279;Transcript_198996;Transcript_200106;Tra…
GO:0006417	P:regulation_of_translation	28	1.98317e-15	Transcript_005521;Transcript_010897;Transcript_012502;Transcript_017353;Transcript_019177;Transcript_025481;Transcript_027868;Transcript_038190;Transcript_043672;Transcript_071770;Transcript_079355;Transcript_098798;Transcript_102209;Transcript_124311;Transcript_127726;Transcript_132150;Transcript_141989;Transcript_171072;Transcript_173665;Transcript_176851;Transcript_183059;Transcript_183500;Tra…
GO:0016301	F:kinase_activity	28	3.54514e-20	Transcript_001759;Transcript_003646;Transcript_006369;Transcript_007545;Transcript_012490;Transcript_016397;Transcript_018544;Transcript_023198;Transcript_024653;Transcript_028243;Transcript_029681;Transcript_034667;Transcript_037427;Transcript_042232;Transcript_043876;Transcript_070575;Transcript_081695;Transcript_149488;Transcript_156614;Transcript_165366;Transcript_175505;Transcript_183958;Tra…
GO:0005516	F:calmodulin_binding	28	8.01942e-21	Transcript_000155;Transcript_007546;Transcript_009299;Transcript_011036;Transcript_018442;Transcript_021004;Transcript_024725;Transcript_026712;Transcript_028087;Transcript_030639;Transcript_035998;Transcript_038148;Transcript_038457;Transcript_046627;Transcript_061432;Transcript_083718;Transcript_094325;Transcript_137392;Transcript_150488;Transcript_155089;Transcript_155852;Transcript_168472;Tra…
GO:0007264	P:small_GTPase_mediated_signal_transduction	28	4.27441e-18	Transcript_000872;Transcript_005796;Transcript_011606;Transcript_014592;Transcript_017347;Transcript_026609;Transcript_027565;Transcript_032312;Transcript_042857;Transcript_048502;Transcript_069354;Transcript_080040;Transcript_128921;Transcript_141684;Transcript_153138;Transcript_160845;Transcript_161106;Transcript_176055;Transcript_180025;Transcript_190714;Transcript_194460;Transcript_200572;Tra…
ko04151	PI3K-Akt_signaling_pathway	28	2.12954e-19	Transcript_007119;Transcript_008779;Transcript_011423;Transcript_015425;Transcript_015701;Transcript_016618;Transcript_021276;Transcript_023790;Transcript_027594;Transcript_042857;Transcript_043672;Transcript_043723;Transcript_047623;Transcript_079199;Transcript_095402;Transcript_130943;Transcript_141684;Transcript_145801;Transcript_156614;Transcript_173665;Transcript_189036;Transcript_199440;Tra…
GO:0004497	F:monooxygenase_activity	28	1.57145e-19	Transcript_001112;Transcript_006381;Transcript_006562;Transcript_041652;Transcript_047379;Transcript_050672;Transcript_062590;Transcript_065706;Transcript_124468;Transcript_126589;Transcript_156967;Transcript_158585;Transcript_161381;Transcript_172013;Transcript_172345;Transcript_175554;Transcript_184091;Transcript_192603;Transcript_195136;Transcript_195900;Transcript_198987;Transcript_207404;Tra…
GO:0005635	C:nuclear_envelope	28	5.81885e-13	Transcript_006758;Transcript_006794;Transcript_014168;Transcript_020179;Transcript_026351;Transcript_034795;Transcript_036659;Transcript_037534;Transcript_042225;Transcript_064290;Transcript_066093;Transcript_089195;Transcript_107673;Transcript_113011;Transcript_151294;Transcript_155115;Transcript_158767;Transcript_175706;Transcript_175977;Transcript_202622;Transcript_203430;Transcript_209201;Tra…
GO:0050662	F:coenzyme_binding	27	3.6776e-12	Transcript_003524;Transcript_003949;Transcript_006882;Transcript_011900;Transcript_019848;Transcript_026071;Transcript_034417;Transcript_037115;Transcript_043198;Transcript_061770;Transcript_074885;Transcript_075566;Transcript_101166;Transcript_114125;Transcript_125168;Transcript_153137;Transcript_174469;Transcript_185395;Transcript_191388;Transcript_194227;Transcript_208346;Transcript_225000;Tra…
ko00970	Aminoacyl-tRNA_biosynthesis	27	1.2742e-13	Transcript_000781;Transcript_003029;Transcript_005378;Transcript_006099;Transcript_007804;Transcript_013736;Transcript_013980;Transcript_014238;Transcript_014671;Transcript_020710;Transcript_021939;Transcript_025658;Transcript_030889;Transcript_039594;Transcript_055528;Transcript_061806;Transcript_079474;Transcript_079957;Transcript_084126;Transcript_084534;Transcript_178982;Transcript_186544;Tra…
GO:0007623	P:circadian_rhythm	27	4.886e-12	Transcript_001647;Transcript_002020;Transcript_004574;Transcript_013605;Transcript_014745;Transcript_026071;Transcript_027685;Transcript_029879;Transcript_029928;Transcript_032257;Transcript_034417;Transcript_041388;Transcript_056957;Transcript_098798;Transcript_113812;Transcript_149849;Transcript_167378;Transcript_170102;Transcript_184529;Transcript_188900;Transcript_191388;Transcript_208346;Tra…
ko04011	MAPK_signaling_pathway_-_yeast	27	5.291e-09	Transcript_012770;Transcript_016618;Transcript_025702;Transcript_027594;Transcript_031211;Transcript_033079;Transcript_035369;Transcript_041385;Transcript_042270;Transcript_044619;Transcript_047623;Transcript_048879;Transcript_052823;Transcript_145801;Transcript_149739;Transcript_156614;Transcript_162179;Transcript_172468;Transcript_174195;Transcript_187487;Transcript_188882;Transcript_193346;Tra…
GO:0003729	F:mRNA_binding	27	5.4868e-09	Transcript_001387;Transcript_012893;Transcript_014745;Transcript_015286;Transcript_017353;Transcript_018213;Transcript_018408;Transcript_020644;Transcript_025855;Transcript_032830;Transcript_043594;Transcript_043984;Transcript_049530;Transcript_076061;Transcript_089022;Transcript_110572;Transcript_126578;Transcript_141989;Transcript_158584;Transcript_163680;Transcript_168571;Transcript_172408;Tra…
GO:0006310	P:DNA_recombination	27	5.291e-09	Transcript_007752;Transcript_009350;Transcript_013610;Transcript_025591;Transcript_030179;Transcript_030874;Transcript_032060;Transcript_032348;Transcript_041509;Transcript_044239;Transcript_059671;Transcript_115044;Transcript_133159;Transcript_137080;Transcript_141042;Transcript_149605;Transcript_152805;Transcript_167765;Transcript_168571;Transcript_191489;Transcript_191805;Transcript_192198;Tra…
ko00051	Fructose_and_mannose_metabolism	27	7.49185e-11	Transcript_009113;Transcript_013311;Transcript_018566;Transcript_018771;Transcript_022475;Transcript_024848;Transcript_026295;Transcript_027666;Transcript_031292;Transcript_034153;Transcript_034989;Transcript_036578;Transcript_037736;Transcript_046002;Transcript_054354;Transcript_063511;Transcript_091033;Transcript_104566;Transcript_132060;Transcript_150144;Transcript_158967;Transcript_179420;Tra…
GO:0022627	C:cytosolic_small_ribosomal_subunit_	27	9.5141e-16	Transcript_014979;Transcript_016794;Transcript_017540;Transcript_018213;Transcript_027139;Transcript_031477;Transcript_034011;Transcript_036865;Transcript_040950;Transcript_041532;Transcript_041939;Transcript_089022;Transcript_089724;Transcript_100677;Transcript_110572;Transcript_132621;Transcript_148836;Transcript_152262;Transcript_160089;Transcript_165156;Transcript_174447;Transcript_180432;Tra…
GO:0006970	P:response_to_osmotic_stress	26	6.20075e-20	Transcript_007373;Transcript_008952;Transcript_012406;Transcript_014764;Transcript_018566;Transcript_023779;Transcript_032795;Transcript_041464;Transcript_041900;Transcript_042074;Transcript_043420;Transcript_047623;Transcript_083601;Transcript_111801;Transcript_152123;Transcript_170251;Transcript_170551;Transcript_173237;Transcript_199000;Transcript_203093;Transcript_203354;Transcript_226575;Tra…
GO:0009705	C:plant-type_vacuole_membrane	26	8.50895e-20	Transcript_007607;Transcript_020623;Transcript_025024;Transcript_028356;Transcript_028518;Transcript_033582;Transcript_037763;Transcript_037791;Transcript_042281;Transcript_045780;Transcript_045823;Transcript_046718;Transcript_047515;Transcript_059299;Transcript_152905;Transcript_155866;Transcript_156205;Transcript_171817;Transcript_173256;Transcript_184137;Transcript_218023;Transcript_223677;Tra…
GO:0031047	P:gene_silencing_by_RNA	26	4.06666e-07	Transcript_005521;Transcript_012222;Transcript_013527;Transcript_020851;Transcript_025065;Transcript_027645;Transcript_030994;Transcript_031558;Transcript_032830;Transcript_036346;Transcript_079355;Transcript_084327;Transcript_098798;Transcript_098912;Transcript_165027;Transcript_176851;Transcript_183059;Transcript_183500;Transcript_190420;Transcript_201646;Transcript_222288;Transcript_225407;Tra…
ko04071	Sphingolipid_signaling_pathway	26	2.13169e-14	Transcript_004067;Transcript_007119;Transcript_008779;Transcript_015425;Transcript_023455;Transcript_023633;Transcript_031577;Transcript_042796;Transcript_042857;Transcript_043723;Transcript_047623;Transcript_052646;Transcript_079199;Transcript_095402;Transcript_108668;Transcript_129190;Transcript_137032;Transcript_141684;Transcript_156614;Transcript_174866;Transcript_194130;Transcript_199440;Tra…
GO:0003899	F:DNA-directed_RNA_polymerase_activity	26	2.49107e-08	Transcript_001578;Transcript_004956;Transcript_009107;Transcript_016072;Transcript_021333;Transcript_030460;Transcript_031916;Transcript_065708;Transcript_079006;Transcript_096996;Transcript_128231;Transcript_166058;Transcript_170193;Transcript_173062;Transcript_186598;Transcript_188963;Transcript_190451;Transcript_193105;Transcript_201274;Transcript_209113;Transcript_219696;Transcript_222197;Tra…
ko04721	Synaptic_vesicle_cycle	26	4.81807e-13	Transcript_009551;Transcript_011643;Transcript_014408;Transcript_014860;Transcript_016602;Transcript_024398;Transcript_027093;Transcript_028670;Transcript_029780;Transcript_030029;Transcript_038170;Transcript_039901;Transcript_069330;Transcript_073956;Transcript_153016;Transcript_175654;Transcript_183515;Transcript_190353;Transcript_198286;Transcript_198712;Transcript_198876;Transcript_205656;Tra…
GO:0009706	C:chloroplast_inner_membrane	26	2.60062e-12	Transcript_006968;Transcript_022233;Transcript_026139;Transcript_029613;Transcript_029735;Transcript_045065;Transcript_061583;Transcript_062717;Transcript_072465;Transcript_082911;Transcript_099826;Transcript_133304;Transcript_149410;Transcript_152004;Transcript_152970;Transcript_177136;Transcript_177905;Transcript_192867;Transcript_195053;Transcript_196785;Transcript_201953;Transcript_207969;Tra…
GO:0030170	F:pyridoxal_phosphate_binding	26	3.62906e-25	Transcript_002884;Transcript_003307;Transcript_005417;Transcript_010828;Transcript_021173;Transcript_025090;Transcript_046799;Transcript_047399;Transcript_049636;Transcript_059679;Transcript_063609;Transcript_082806;Transcript_133775;Transcript_146010;Transcript_149588;Transcript_153764;Transcript_155513;Transcript_155852;Transcript_161380;Transcript_162305;Transcript_168703;Transcript_197658;Tra…
GO:0010008	C:endosome_membrane_	26	2.62254e-25	Transcript_008058;Transcript_010331;Transcript_011514;Transcript_016549;Transcript_017670;Transcript_024917;Transcript_031641;Transcript_041983;Transcript_042674;Transcript_050291;Transcript_052555;Transcript_084140;Transcript_106584;Transcript_126816;Transcript_151618;Transcript_158529;Transcript_167282;Transcript_167774;Transcript_176876;Transcript_195278;Transcript_198729;Transcript_199976;Tra…
GO:0009416	P:response_to_light_stimulus	25	2.44774e-12	Transcript_017408;Transcript_017588;Transcript_029613;Transcript_029726;Transcript_042756;Transcript_054816;Transcript_065706;Transcript_083718;Transcript_108142;Transcript_138452;Transcript_139256;Transcript_139629;Transcript_151175;Transcript_158967;Transcript_190489;Transcript_192580;Transcript_193437;Transcript_196794;Transcript_200726;Transcript_212311;Transcript_217546;Transcript_226575;Tra…
ko05166	HTLV-I_infection	25	1.05925e-22	Transcript_004938;Transcript_006688;Transcript_008525;Transcript_011770;Transcript_019608;Transcript_019818;Transcript_024392;Transcript_024653;Transcript_033497;Transcript_034168;Transcript_041381;Transcript_042195;Transcript_045165;Transcript_046417;Transcript_095344;Transcript_143107;Transcript_153138;Transcript_169395;Transcript_176055;Transcript_186407;Transcript_203093;Transcript_212589;Tra…
ko04310	Wnt_signaling_pathway	25	2.45191e-14	Transcript_003797;Transcript_007752;Transcript_010389;Transcript_018651;Transcript_024392;Transcript_024752;Transcript_027923;Transcript_028007;Transcript_033297;Transcript_041585;Transcript_042195;Transcript_042322;Transcript_042857;Transcript_047860;Transcript_058742;Transcript_105439;Transcript_141684;Transcript_150303;Transcript_181250;Transcript_188900;Transcript_200106;Transcript_204779;Tra…
ko00270	Cysteine_and_methionine_metabolism	25	3.30244e-14	Transcript_005196;Transcript_007485;Transcript_016154;Transcript_018351;Transcript_043513;Transcript_049636;Transcript_053135;Transcript_062005;Transcript_085588;Transcript_103284;Transcript_119864;Transcript_133775;Transcript_141447;Transcript_142719;Transcript_149881;Transcript_165002;Transcript_168703;Transcript_189646;Transcript_200415;Transcript_202210;Transcript_211082;Transcript_229757;Tra…
GO:0016705	F:oxidoreductase_activity,_acting_on_paired_donors,_with_incorporation_or_reduction_of_molecular_oxygen	25	4.90676e-20	Transcript_001112;Transcript_006381;Transcript_006562;Transcript_016952;Transcript_041652;Transcript_046471;Transcript_047379;Transcript_050672;Transcript_062590;Transcript_065706;Transcript_124468;Transcript_156967;Transcript_158585;Transcript_161381;Transcript_172013;Transcript_172345;Transcript_175554;Transcript_192603;Transcript_195136;Transcript_198987;Transcript_213772;Transcript_214379;Tra…
GO:0007018	P:microtubule-based_movement	25	1.53077e-10	Transcript_008054;Transcript_011299;Transcript_013688;Transcript_015088;Transcript_017838;Transcript_025912;Transcript_031150;Transcript_033907;Transcript_053402;Transcript_057704;Transcript_121475;Transcript_122505;Transcript_132045;Transcript_150488;Transcript_169676;Transcript_175416;Transcript_177201;Transcript_177955;Transcript_183925;Transcript_200871;Transcript_204764;Transcript_234993;Tra…
ko05034	Alcoholism	25	4.10519e-08	Transcript_008491;Transcript_011139;Transcript_015336;Transcript_015927;Transcript_023198;Transcript_023681;Transcript_028228;Transcript_028243;Transcript_029618;Transcript_036517;Transcript_039560;Transcript_043524;Transcript_047441;Transcript_047623;Transcript_060889;Transcript_154666;Transcript_174680;Transcript_176347;Transcript_194853;Transcript_199440;Transcript_225598;Transcript_230920;Tra…
ko01212	Fatty_acid_metabolism	25	1.25501e-19	Transcript_010061;Transcript_013456;Transcript_015934;Transcript_028090;Transcript_028424;Transcript_028726;Transcript_072738;Transcript_080382;Transcript_090548;Transcript_095194;Transcript_117260;Transcript_151724;Transcript_152573;Transcript_160618;Transcript_165162;Transcript_169987;Transcript_186076;Transcript_192500;Transcript_204425;Transcript_228819;Transcript_232230;Transcript_232327;Tra…
GO:0048471	C:perinuclear_region_of_cytoplasm	24	2.16893e-13	Transcript_002727;Transcript_004120;Transcript_006096;Transcript_014610;Transcript_015001;Transcript_023790;Transcript_024445;Transcript_030766;Transcript_031964;Transcript_033079;Transcript_036750;Transcript_040271;Transcript_041095;Transcript_043672;Transcript_089339;Transcript_150296;Transcript_151294;Transcript_152100;Transcript_154664;Transcript_187317;Transcript_202186;Transcript_209163;Tra…
ko00260	Glycine,_serine_and_threonine_metabolism	24	1.35536e-19	Transcript_002884;Transcript_013218;Transcript_035652;Transcript_040305;Transcript_044878;Transcript_047399;Transcript_066519;Transcript_085588;Transcript_089972;Transcript_095144;Transcript_100833;Transcript_104492;Transcript_112757;Transcript_132945;Transcript_138990;Transcript_152682;Transcript_161507;Transcript_189170;Transcript_209355;Transcript_227327;Transcript_229317;Transcript_230776;Tra…
GO:0008360	P:regulation_of_cell_shape	24	5.71122e-10	Transcript_004937;Transcript_007513;Transcript_013605;Transcript_025702;Transcript_035369;Transcript_041385;Transcript_042164;Transcript_042270;Transcript_044365;Transcript_048879;Transcript_056416;Transcript_162179;Transcript_172468;Transcript_173044;Transcript_186273;Transcript_188882;Transcript_193346;Transcript_200106;Transcript_203386;Transcript_203408;Transcript_206222;Transcript_227925;Tra…
ko04013	MAPK_signaling_pathway_-_fly	24	3.88844e-13	Transcript_003797;Transcript_015425;Transcript_016564;Transcript_018651;Transcript_042322;Transcript_042857;Transcript_047479;Transcript_047623;Transcript_047860;Transcript_051734;Transcript_058742;Transcript_069023;Transcript_083168;Transcript_095195;Transcript_097091;Transcript_106058;Transcript_141684;Transcript_181250;Transcript_185170;Transcript_188300;Transcript_199440;Transcript_204779;Tra…
GO:0009813	P:flavonoid_biosynthetic_process	24	2.22199e-14	Transcript_007607;Transcript_011058;Transcript_037763;Transcript_037922;Transcript_042281;Transcript_042760;Transcript_043264;Transcript_044124;Transcript_045823;Transcript_128369;Transcript_139224;Transcript_154822;Transcript_173256;Transcript_195704;Transcript_195757;Transcript_205051;Transcript_205594;Transcript_207369;Transcript_223677;Transcript_225112;Transcript_235026;Transcript_237341;Tra…
GO:0043231	C:intracellular_membrane-bounded_organelle_	24	7.00921e-13	Transcript_007752;Transcript_011058;Transcript_014463;Transcript_016072;Transcript_024907;Transcript_026099;Transcript_031964;Transcript_041670;Transcript_042674;Transcript_042864;Transcript_090283;Transcript_093527;Transcript_167774;Transcript_176865;Transcript_185499;Transcript_195704;Transcript_195757;Transcript_205051;Transcript_206114;Transcript_207369;Transcript_231485;Transcript_235339;Tra…
ko04111	Cell_cycle_-_yeast	24	1.94105e-16	Transcript_006688;Transcript_008779;Transcript_010389;Transcript_011770;Transcript_015425;Transcript_024752;Transcript_027923;Transcript_028007;Transcript_033497;Transcript_041381;Transcript_041585;Transcript_045071;Transcript_065669;Transcript_072481;Transcript_079199;Transcript_094306;Transcript_095402;Transcript_096227;Transcript_105439;Transcript_143107;Transcript_151250;Transcript_169395;Tra…
GO:0006486	P:protein_glycosylation	24	6.65477e-15	Transcript_004507;Transcript_004775;Transcript_017173;Transcript_017448;Transcript_024015;Transcript_029215;Transcript_043902;Transcript_048209;Transcript_112543;Transcript_113745;Transcript_150852;Transcript_151294;Transcript_156195;Transcript_157849;Transcript_165441;Transcript_170169;Transcript_171029;Transcript_172297;Transcript_213787;Transcript_222814;Transcript_227888;Transcript_229590;Tra…
GO:0015991	P:ATP_hydrolysis_coupled_proton_transport	24	1.2127e-14	Transcript_002930;Transcript_006117;Transcript_009551;Transcript_016602;Transcript_019100;Transcript_024398;Transcript_027002;Transcript_028670;Transcript_030029;Transcript_037065;Transcript_042379;Transcript_073956;Transcript_148330;Transcript_165487;Transcript_172831;Transcript_173000;Transcript_183515;Transcript_190353;Transcript_205656;Transcript_218023;Transcript_230521;Transcript_231595;Tra…
ko05110	Vibrio_cholerae_infection	24	3.84897e-12	Transcript_005796;Transcript_008257;Transcript_008619;Transcript_009551;Transcript_014408;Transcript_016602;Transcript_024398;Transcript_026609;Transcript_027565;Transcript_028670;Transcript_030029;Transcript_044726;Transcript_048502;Transcript_073956;Transcript_088161;Transcript_149510;Transcript_165742;Transcript_183515;Transcript_190353;Transcript_205656;Transcript_218023;Transcript_227873;Tra…
GO:0005871	C:kinesin_complex	24	5.71122e-10	Transcript_008054;Transcript_011299;Transcript_013688;Transcript_015088;Transcript_017838;Transcript_025912;Transcript_031150;Transcript_033907;Transcript_053402;Transcript_057704;Transcript_121475;Transcript_122505;Transcript_132045;Transcript_150488;Transcript_169676;Transcript_175416;Transcript_177201;Transcript_177955;Transcript_183925;Transcript_200871;Transcript_204764;Transcript_238256;Tra…
ko05152	Tuberculosis	24	7.00921e-13	Transcript_000872;Transcript_009551;Transcript_016602;Transcript_016668;Transcript_023633;Transcript_024392;Transcript_028670;Transcript_030029;Transcript_042195;Transcript_047623;Transcript_052646;Transcript_096467;Transcript_109160;Transcript_137032;Transcript_159501;Transcript_161256;Transcript_183515;Transcript_199440;Transcript_205656;Transcript_218023;Transcript_227948;Transcript_234723;Tra…
GO:0009735	P:response_to_cytokinin	24	8.44862e-16	Transcript_007763;Transcript_010060;Transcript_018511;Transcript_020208;Transcript_025090;Transcript_025627;Transcript_027150;Transcript_031196;Transcript_046799;Transcript_048483;Transcript_051630;Transcript_052435;Transcript_065295;Transcript_100919;Transcript_115742;Transcript_133451;Transcript_133564;Transcript_150144;Transcript_152125;Transcript_161697;Transcript_209703;Transcript_210608;Tra…
GO:0005875	C:microtubule_associated_complex	24	5.04396e-09	Transcript_014770;Transcript_019100;Transcript_030990;Transcript_032610;Transcript_035258;Transcript_037375;Transcript_040010;Transcript_041704;Transcript_049359;Transcript_053402;Transcript_069308;Transcript_070575;Transcript_084750;Transcript_087162;Transcript_088161;Transcript_121580;Transcript_173665;Transcript_187104;Transcript_205655;Transcript_224812;Transcript_225114;Transcript_227161;Tra…
GO:0006099	P:tricarboxylic_acid_cycle	23	2.64308e-17	Transcript_000495;Transcript_007527;Transcript_010158;Transcript_010583;Transcript_017186;Transcript_025008;Transcript_031909;Transcript_033355;Transcript_033792;Transcript_036517;Transcript_040630;Transcript_044843;Transcript_059044;Transcript_077772;Transcript_110053;Transcript_149630;Transcript_185040;Transcript_187104;Transcript_187708;Transcript_203431;Transcript_212985;Transcript_222193;Tra…
GO:0006260	P:DNA_replication	23	2.64308e-17	Transcript_009593;Transcript_014919;Transcript_019818;Transcript_020191;Transcript_030179;Transcript_040009;Transcript_042282;Transcript_042565;Transcript_045071;Transcript_079313;Transcript_084466;Transcript_094306;Transcript_095437;Transcript_096227;Transcript_157904;Transcript_164613;Transcript_177527;Transcript_189362;Transcript_191805;Transcript_202894;Transcript_224812;Transcript_241339;Tra…
GO:0006606	P:protein_import_into_nucleus	23	1.45672e-06	Transcript_002727;Transcript_004587;Transcript_016204;Transcript_020179;Transcript_026351;Transcript_027199;Transcript_036659;Transcript_036921;Transcript_037534;Transcript_045142;Transcript_113011;Transcript_144287;Transcript_153138;Transcript_158767;Transcript_160433;Transcript_176055;Transcript_198792;Transcript_202186;Transcript_233347;Transcript_234819;Transcript_237758;Transcript_243146;Tra…
GO:0000226	P:microtubule_cytoskeleton_organization	23	6.92977e-08	Transcript_010897;Transcript_024752;Transcript_027923;Transcript_034795;Transcript_053053;Transcript_055435;Transcript_056416;Transcript_084439;Transcript_089102;Transcript_097854;Transcript_105213;Transcript_124992;Transcript_171072;Transcript_179685;Transcript_195799;Transcript_209023;Transcript_222659;Transcript_227945;Transcript_228274;Transcript_229002;Transcript_229436;Transcript_243753;Tra…
ko00680	Methane_metabolism	23	4.58348e-13	Transcript_013311;Transcript_018771;Transcript_023260;Transcript_027666;Transcript_034153;Transcript_036578;Transcript_044198;Transcript_044878;Transcript_046002;Transcript_047399;Transcript_059044;Transcript_089972;Transcript_091033;Transcript_104492;Transcript_152682;Transcript_179420;Transcript_189170;Transcript_209140;Transcript_223091;Transcript_227823;Transcript_230776;Transcript_241568;Tra…
GO:0052689	F:carboxylic_ester_hydrolase_activity	23	8.19714e-13	Transcript_005544;Transcript_007888;Transcript_008472;Transcript_033841;Transcript_044124;Transcript_044198;Transcript_045550;Transcript_079138;Transcript_092053;Transcript_096813;Transcript_105510;Transcript_113960;Transcript_114325;Transcript_126365;Transcript_150356;Transcript_157992;Transcript_169444;Transcript_177770;Transcript_183442;Transcript_188923;Transcript_194897;Transcript_207774;Tra…
GO:0008137	F:NADH_dehydrogenase_(ubiquinone)_activity	23	1.21914e-09	Transcript_001489;Transcript_016808;Transcript_023779;Transcript_024991;Transcript_031552;Transcript_040269;Transcript_043006;Transcript_062205;Transcript_062246;Transcript_104017;Transcript_139464;Transcript_164259;Transcript_171030;Transcript_183174;Transcript_187278;Transcript_198631;Transcript_200897;Transcript_219022;Transcript_222418;Transcript_222684;Transcript_227615;Transcript_235632;Tra…
ko04113	Meiosis_-_yeast	23	6.08682e-12	Transcript_006688;Transcript_007119;Transcript_011770;Transcript_015425;Transcript_023681;Transcript_033497;Transcript_041381;Transcript_043524;Transcript_043723;Transcript_045071;Transcript_047441;Transcript_065669;Transcript_072481;Transcript_079199;Transcript_094306;Transcript_096227;Transcript_143107;Transcript_154666;Transcript_169395;Transcript_189362;Transcript_230920;Transcript_230959;Tra…
GO:0051537	F:2_iron,_2_sulfur_cluster_binding	23	1.0744e-08	Transcript_001711;Transcript_009470;Transcript_026139;Transcript_044747;Transcript_048440;Transcript_081088;Transcript_094309;Transcript_106807;Transcript_138990;Transcript_152903;Transcript_155513;Transcript_155782;Transcript_166124;Transcript_177905;Transcript_183174;Transcript_187104;Transcript_195589;Transcript_196736;Transcript_211971;Transcript_213769;Transcript_222418;Transcript_232290;Tra…
GO:0050661	F:NADP_binding	23	9.63757e-16	Transcript_008733;Transcript_010592;Transcript_011583;Transcript_014164;Transcript_029726;Transcript_030924;Transcript_074044;Transcript_085588;Transcript_123817;Transcript_128232;Transcript_151402;Transcript_155850;Transcript_169609;Transcript_170151;Transcript_172668;Transcript_189852;Transcript_207404;Transcript_215115;Transcript_220348;Transcript_220463;Transcript_222948;Transcript_224067;Tra…
ko00480	Glutathione_metabolism	23	1.47398e-12	Transcript_003627;Transcript_004917;Transcript_006794;Transcript_007947;Transcript_008733;Transcript_014164;Transcript_023351;Transcript_026918;Transcript_033768;Transcript_046620;Transcript_115742;Transcript_133451;Transcript_161697;Transcript_175977;Transcript_185040;Transcript_187708;Transcript_190242;Transcript_192605;Transcript_210608;Transcript_224067;Transcript_228302;Transcript_232270;Tra…
GO:0003697	F:single-stranded_DNA_binding	22	1.10504e-05	Transcript_004956;Transcript_007788;Transcript_012406;Transcript_018681;Transcript_024850;Transcript_025477;Transcript_040436;Transcript_041464;Transcript_049530;Transcript_084390;Transcript_096227;Transcript_115044;Transcript_156971;Transcript_168571;Transcript_170251;Transcript_191489;Transcript_192198;Transcript_202894;Transcript_204204;Transcript_215297;Transcript_226697;Transcript_227135
GO:0009826	P:unidimensional_cell_growth	22	5.50184e-13	Transcript_000717;Transcript_001759;Transcript_010309;Transcript_017571;Transcript_021469;Transcript_022788;Transcript_031196;Transcript_035136;Transcript_041388;Transcript_042756;Transcript_043876;Transcript_047430;Transcript_065665;Transcript_100071;Transcript_150750;Transcript_170790;Transcript_172146;Transcript_184628;Transcript_197324;Transcript_200726;Transcript_217772;Transcript_219435
GO:0061630	F:ubiquitin_protein_ligase_activity	22	6.0586e-16	Transcript_005018;Transcript_008592;Transcript_015082;Transcript_016705;Transcript_019837;Transcript_020594;Transcript_031840;Transcript_041578;Transcript_044220;Transcript_047479;Transcript_083168;Transcript_103122;Transcript_124889;Transcript_186406;Transcript_198115;Transcript_210055;Transcript_227122;Transcript_231120;Transcript_231411;Transcript_238539;Transcript_241851;Transcript_243787
GO:0003964	F:RNA-directed_DNA_polymerase_activity	22	6.64064e-15	Transcript_002866;Transcript_009909;Transcript_012036;Transcript_025591;Transcript_032060;Transcript_032348;Transcript_044239;Transcript_045095;Transcript_045874;Transcript_069093;Transcript_090961;Transcript_133159;Transcript_141042;Transcript_149605;Transcript_151584;Transcript_152805;Transcript_154439;Transcript_164718;Transcript_167015;Transcript_170075;Transcript_229724;Transcript_244762
GO:0008168	F:methyltransferase_activity	22	2.14304e-21	Transcript_005332;Transcript_014385;Transcript_022146;Transcript_023563;Transcript_026410;Transcript_037790;Transcript_081630;Transcript_120539;Transcript_127448;Transcript_164835;Transcript_187420;Transcript_196736;Transcript_198895;Transcript_198996;Transcript_204200;Transcript_225830;Transcript_231771;Transcript_234626;Transcript_236609;Transcript_238975;Transcript_240206;Transcript_244287
ko04810	Regulation_of_actin_cytoskeleton	22	3.98274e-17	Transcript_010331;Transcript_023681;Transcript_032864;Transcript_041983;Transcript_042857;Transcript_043524;Transcript_047441;Transcript_047623;Transcript_088161;Transcript_088340;Transcript_129988;Transcript_141684;Transcript_149739;Transcript_153014;Transcript_154666;Transcript_190112;Transcript_193252;Transcript_194999;Transcript_199440;Transcript_230920;Transcript_231986;Transcript_238732
GO:0008643	P:carbohydrate_transport	22	2.6088e-09	Transcript_000914;Transcript_008835;Transcript_009044;Transcript_017956;Transcript_018389;Transcript_018520;Transcript_027489;Transcript_053129;Transcript_089635;Transcript_112543;Transcript_125638;Transcript_143589;Transcript_149193;Transcript_156871;Transcript_186214;Transcript_186432;Transcript_196548;Transcript_204201;Transcript_215043;Transcript_230685;Transcript_234039;Transcript_237528
ko00940	Phenylpropanoid_biosynthesis	22	3.06457e-14	Transcript_000049;Transcript_017498;Transcript_017860;Transcript_034417;Transcript_041171;Transcript_044180;Transcript_044610;Transcript_045385;Transcript_050011;Transcript_074778;Transcript_147952;Transcript_151025;Transcript_156468;Transcript_169359;Transcript_170743;Transcript_187034;Transcript_191388;Transcript_195900;Transcript_202168;Transcript_228391;Transcript_234966;Transcript_244801
GO:0003755	F:peptidyl-prolyl_cis-trans_isomerase_activity	22	6.42402e-18	Transcript_000349;Transcript_005547;Transcript_006726;Transcript_015001;Transcript_019126;Transcript_034963;Transcript_054365;Transcript_057334;Transcript_060667;Transcript_060767;Transcript_072848;Transcript_081299;Transcript_158089;Transcript_163532;Transcript_168386;Transcript_168472;Transcript_188471;Transcript_195715;Transcript_196613;Transcript_199505;Transcript_210758;Transcript_212264
ko00710	Carbon_fixation_in_photosynthetic_organisms	22	5.31551e-11	Transcript_018771;Transcript_027666;Transcript_029726;Transcript_030924;Transcript_034155;Transcript_043024;Transcript_046002;Transcript_047367;Transcript_049636;Transcript_058836;Transcript_059044;Transcript_061028;Transcript_121125;Transcript_142152;Transcript_151402;Transcript_179420;Transcript_186303;Transcript_209140;Transcript_216692;Transcript_217483;Transcript_222948;Transcript_243672
GO:0009753	P:response_to_jasmonic_acid	22	9.92122e-21	Transcript_004579;Transcript_009299;Transcript_009778;Transcript_012470;Transcript_016906;Transcript_018237;Transcript_023629;Transcript_033045;Transcript_033950;Transcript_043650;Transcript_043997;Transcript_047958;Transcript_059679;Transcript_068534;Transcript_094325;Transcript_101040;Transcript_121996;Transcript_151721;Transcript_184551;Transcript_185779;Transcript_198258;Transcript_217546
ko04024	cAMP_signaling_pathway	22	5.53269e-11	Transcript_004067;Transcript_023455;Transcript_023681;Transcript_024392;Transcript_031577;Transcript_042195;Transcript_042857;Transcript_043524;Transcript_047441;Transcript_047623;Transcript_093127;Transcript_095194;Transcript_129190;Transcript_141684;Transcript_154666;Transcript_186076;Transcript_199440;Transcript_229716;Transcript_230920;Transcript_231986;Transcript_237083;Transcript_241205
GO:0042744	P:hydrogen_peroxide_catabolic_process	22	6.57843e-08	Transcript_000049;Transcript_005882;Transcript_006334;Transcript_012770;Transcript_017498;Transcript_018511;Transcript_023351;Transcript_030980;Transcript_031050;Transcript_041171;Transcript_044209;Transcript_052823;Transcript_115742;Transcript_133451;Transcript_156468;Transcript_161697;Transcript_169359;Transcript_174195;Transcript_187487;Transcript_201007;Transcript_210608;Transcript_233284
GO:0005764	C:lysosome	21	2.73936e-11	Transcript_006096;Transcript_008058;Transcript_012454;Transcript_012532;Transcript_023633;Transcript_038930;Transcript_042164;Transcript_044180;Transcript_052646;Transcript_064646;Transcript_077629;Transcript_109160;Transcript_109625;Transcript_117260;Transcript_137032;Transcript_151294;Transcript_156034;Transcript_201375;Transcript_204757;Transcript_204880;Transcript_214162
GO:0006974	P:cellular_response_to_DNA_damage_stimulus	21	4.87323e-11	Transcript_016835;Transcript_018566;Transcript_018681;Transcript_026804;Transcript_031964;Transcript_042282;Transcript_089195;Transcript_096227;Transcript_096701;Transcript_129307;Transcript_149849;Transcript_155998;Transcript_156640;Transcript_156971;Transcript_189510;Transcript_194853;Transcript_205797;Transcript_233284;Transcript_234015;Transcript_235577;Transcript_241339
GO:0004004	F:ATP-dependent_RNA_helicase_activity	21	5.41406e-07	Transcript_018681;Transcript_022302;Transcript_043594;Transcript_050764;Transcript_064028;Transcript_087162;Transcript_091642;Transcript_113060;Transcript_114295;Transcript_134784;Transcript_144914;Transcript_150296;Transcript_156971;Transcript_187470;Transcript_197376;Transcript_200884;Transcript_209767;Transcript_226638;Transcript_231075;Transcript_232073;Transcript_235815
ko03020	RNA_polymerase	21	3.72532e-05	Transcript_009107;Transcript_016072;Transcript_021333;Transcript_030460;Transcript_031916;Transcript_058931;Transcript_065708;Transcript_079006;Transcript_128231;Transcript_166058;Transcript_170193;Transcript_173062;Transcript_190451;Transcript_193105;Transcript_201274;Transcript_209113;Transcript_219696;Transcript_222197;Transcript_229714;Transcript_231774;Transcript_241662
GO:0042254	P:ribosome_biogenesis	21	6.51236e-11	Transcript_021035;Transcript_021650;Transcript_023503;Transcript_043219;Transcript_058931;Transcript_084424;Transcript_099194;Transcript_116571;Transcript_116719;Transcript_144287;Transcript_150136;Transcript_152125;Transcript_169483;Transcript_172959;Transcript_204839;Transcript_218290;Transcript_223871;Transcript_229572;Transcript_234015;Transcript_243164;Transcript_244489
GO:0000786	C:nucleosome	21	3.53246e-10	Transcript_008491;Transcript_015336;Transcript_015927;Transcript_020507;Transcript_029618;Transcript_039560;Transcript_060889;Transcript_099411;Transcript_099559;Transcript_130510;Transcript_149846;Transcript_154681;Transcript_174680;Transcript_176347;Transcript_180608;Transcript_185779;Transcript_207810;Transcript_209688;Transcript_229840;Transcript_236174;Transcript_239848
GO:0008237	F:metallopeptidase_activity	21	1.94668e-06	Transcript_003627;Transcript_015867;Transcript_017909;Transcript_026918;Transcript_043543;Transcript_045246;Transcript_074089;Transcript_084750;Transcript_088596;Transcript_094894;Transcript_096112;Transcript_130536;Transcript_138719;Transcript_145907;Transcript_161218;Transcript_164613;Transcript_170494;Transcript_171013;Transcript_190242;Transcript_238978;Transcript_243143
GO:0005747	C:mitochondrial_respiratory_chain_complex_I_	21	1.11869e-07	Transcript_015263;Transcript_016808;Transcript_020282;Transcript_022975;Transcript_023779;Transcript_024930;Transcript_024991;Transcript_033826;Transcript_040269;Transcript_043006;Transcript_044397;Transcript_050341;Transcript_183174;Transcript_187278;Transcript_193351;Transcript_196980;Transcript_198631;Transcript_222418;Transcript_227327;Transcript_236702;Transcript_241845
GO:0042626	F:ATPase_activity,_coupled_to_transmembrane_movement_of_substances	21	2.41205e-07	Transcript_001681;Transcript_014408;Transcript_015003;Transcript_019570;Transcript_041670;Transcript_042725;Transcript_042864;Transcript_088879;Transcript_089552;Transcript_109276;Transcript_114161;Transcript_138562;Transcript_149692;Transcript_192248;Transcript_199082;Transcript_206790;Transcript_225665;Transcript_227873;Transcript_233826;Transcript_236713;Transcript_244139
GO:0047262	F:polygalacturonate_4-alpha-galacturonosyltransferase_activity	21	3.72532e-05	Transcript_002525;Transcript_012883;Transcript_016927;Transcript_023111;Transcript_030209;Transcript_036595;Transcript_041419;Transcript_073497;Transcript_074927;Transcript_104797;Transcript_156737;Transcript_161349;Transcript_169923;Transcript_191414;Transcript_191623;Transcript_200400;Transcript_225459;Transcript_232859;Transcript_233464;Transcript_239721;Transcript_244479
ko00561	Glycerolipid_metabolism	21	6.3206e-14	Transcript_008664;Transcript_012368;Transcript_017685;Transcript_018828;Transcript_028562;Transcript_029406;Transcript_048279;Transcript_102735;Transcript_103216;Transcript_111101;Transcript_113727;Transcript_126565;Transcript_128118;Transcript_152989;Transcript_177019;Transcript_191549;Transcript_195679;Transcript_204880;Transcript_206114;Transcript_212121;Transcript_226282
GO:0031902	C:late_endosome_membrane	21	8.77296e-12	Transcript_008058;Transcript_008746;Transcript_010295;Transcript_011918;Transcript_017670;Transcript_023654;Transcript_024543;Transcript_024907;Transcript_032615;Transcript_077629;Transcript_083057;Transcript_090283;Transcript_145838;Transcript_151294;Transcript_174694;Transcript_190714;Transcript_202040;Transcript_236391;Transcript_237478;Transcript_238224;Transcript_244730
GO:0003777	F:microtubule_motor_activity	21	1.12026e-09	Transcript_011299;Transcript_013688;Transcript_017838;Transcript_025912;Transcript_031150;Transcript_053402;Transcript_057704;Transcript_121475;Transcript_122505;Transcript_132045;Transcript_150488;Transcript_169676;Transcript_175416;Transcript_177201;Transcript_177955;Transcript_183925;Transcript_200871;Transcript_204764;Transcript_238256;Transcript_242077;Transcript_242983
GO:0009742	P:brassinosteroid_mediated_signaling_pathway	21	1.41569e-09	Transcript_000483;Transcript_003957;Transcript_004665;Transcript_013002;Transcript_017992;Transcript_018602;Transcript_024241;Transcript_040863;Transcript_041825;Transcript_045306;Transcript_094302;Transcript_097240;Transcript_099685;Transcript_205544;Transcript_216653;Transcript_218401;Transcript_225109;Transcript_235222;Transcript_237610;Transcript_237975;Transcript_239237
GO:0009658	P:chloroplast_organization	20	1.37995e-10	Transcript_007852;Transcript_018126;Transcript_028443;Transcript_029613;Transcript_032936;Transcript_042727;Transcript_044043;Transcript_056651;Transcript_072465;Transcript_074044;Transcript_094309;Transcript_099826;Transcript_104311;Transcript_158589;Transcript_165837;Transcript_183958;Transcript_201953;Transcript_219623;Transcript_240598;Transcript_241991
GO:0032482	P:Rab_protein_signal_transduction	20	4.47628e-11	Transcript_017829;Transcript_018980;Transcript_026635;Transcript_031234;Transcript_033544;Transcript_036792;Transcript_051617;Transcript_089339;Transcript_109160;Transcript_139716;Transcript_159658;Transcript_161256;Transcript_163396;Transcript_166731;Transcript_201809;Transcript_209850;Transcript_227716;Transcript_227992;Transcript_230798;Transcript_243719
GO:0015297	F:antiporter_activity	20	3.17116e-09	Transcript_006005;Transcript_008627;Transcript_011381;Transcript_015968;Transcript_016549;Transcript_017334;Transcript_022569;Transcript_028356;Transcript_029830;Transcript_036388;Transcript_043012;Transcript_075349;Transcript_104049;Transcript_112543;Transcript_161107;Transcript_161599;Transcript_181291;Transcript_186214;Transcript_200633;Transcript_224834
GO:0018105	P:peptidyl-serine_phosphorylation	20	3.30567e-10	Transcript_021004;Transcript_025702;Transcript_035369;Transcript_041385;Transcript_042270;Transcript_046627;Transcript_048879;Transcript_070575;Transcript_083718;Transcript_162179;Transcript_172468;Transcript_173863;Transcript_188882;Transcript_193346;Transcript_200106;Transcript_203093;Transcript_203386;Transcript_227925;Transcript_228491;Transcript_240436
GO:0005788	C:endoplasmic_reticulum_lumen	20	1.61545e-14	Transcript_003919;Transcript_006757;Transcript_015001;Transcript_016813;Transcript_017048;Transcript_023790;Transcript_026087;Transcript_026217;Transcript_032576;Transcript_110200;Transcript_145284;Transcript_161810;Transcript_163532;Transcript_165238;Transcript_166594;Transcript_168167;Transcript_185876;Transcript_187664;Transcript_201782;Transcript_242801
ko00400	Phenylalanine,_tyrosine_and_tryptophan_biosynthesis	20	7.04009e-09	Transcript_002884;Transcript_006354;Transcript_012523;Transcript_017184;Transcript_028573;Transcript_033546;Transcript_033624;Transcript_035392;Transcript_049636;Transcript_100682;Transcript_109203;Transcript_114688;Transcript_133869;Transcript_169609;Transcript_170151;Transcript_176543;Transcript_187678;Transcript_196529;Transcript_198376;Transcript_220535
ko05206	MicroRNAs_in_cancer	20	3.84683e-14	Transcript_007485;Transcript_016154;Transcript_021276;Transcript_024392;Transcript_031147;Transcript_042195;Transcript_042738;Transcript_062005;Transcript_101332;Transcript_102338;Transcript_141447;Transcript_149692;Transcript_149881;Transcript_200415;Transcript_221971;Transcript_225665;Transcript_236713;Transcript_237083;Transcript_242230;Transcript_244139
GO:0005623	C:cell_	20	4.15174e-06	Transcript_009625;Transcript_010309;Transcript_014764;Transcript_015094;Transcript_016022;Transcript_020189;Transcript_031666;Transcript_035277;Transcript_047430;Transcript_053375;Transcript_065403;Transcript_093911;Transcript_124957;Transcript_150750;Transcript_151583;Transcript_167564;Transcript_172146;Transcript_199256;Transcript_233236;Transcript_236080
ko04910	Insulin_signaling_pathway	20	1.07816e-11	Transcript_011423;Transcript_018566;Transcript_021276;Transcript_023681;Transcript_043524;Transcript_043672;Transcript_047441;Transcript_047623;Transcript_063609;Transcript_154666;Transcript_156614;Transcript_173665;Transcript_179420;Transcript_189036;Transcript_199440;Transcript_216217;Transcript_221971;Transcript_230920;Transcript_231986;Transcript_242079
GO:0004298	F:threonine-type_endopeptidase_activity	20	8.83308e-07	Transcript_002519;Transcript_005328;Transcript_012328;Transcript_016053;Transcript_020907;Transcript_023679;Transcript_041803;Transcript_048992;Transcript_119508;Transcript_160414;Transcript_169399;Transcript_192076;Transcript_193398;Transcript_193709;Transcript_194001;Transcript_199477;Transcript_211140;Transcript_224153;Transcript_227451;Transcript_232384
GO:0015074	P:DNA_integration	20	2.69451e-15	Transcript_002866;Transcript_009909;Transcript_012036;Transcript_025591;Transcript_030874;Transcript_032060;Transcript_032348;Transcript_069093;Transcript_090961;Transcript_133159;Transcript_141042;Transcript_149605;Transcript_151584;Transcript_152805;Transcript_154439;Transcript_164718;Transcript_170075;Transcript_229724;Transcript_236506;Transcript_244762
ko05230	Central_carbon_metabolism_in_cancer	20	2.37294e-09	Transcript_005220;Transcript_006512;Transcript_013311;Transcript_015664;Transcript_018566;Transcript_034153;Transcript_036578;Transcript_037817;Transcript_043127;Transcript_047623;Transcript_091033;Transcript_104492;Transcript_132262;Transcript_189170;Transcript_193456;Transcript_199440;Transcript_230776;Transcript_232270;Transcript_241568;Transcript_242230
GO:0005778	C:peroxisomal_membrane	20	5.24845e-06	Transcript_011381;Transcript_015934;Transcript_029830;Transcript_030742;Transcript_030980;Transcript_031050;Transcript_033551;Transcript_089339;Transcript_114161;Transcript_115742;Transcript_129672;Transcript_133451;Transcript_162000;Transcript_176179;Transcript_203137;Transcript_210608;Transcript_232637;Transcript_235108;Transcript_239391;Transcript_241901
GO:0005096	F:GTPase_activator_activity_	20	4.1606e-13	Transcript_011873;Transcript_017713;Transcript_026928;Transcript_028297;Transcript_028795;Transcript_031283;Transcript_036750;Transcript_043014;Transcript_076246;Transcript_118043;Transcript_119865;Transcript_139345;Transcript_149866;Transcript_150515;Transcript_163848;Transcript_171714;Transcript_184648;Transcript_194862;Transcript_224384;Transcript_228852
ko05200	Pathways_in_cancer	20	1.71368e-16	Transcript_003398;Transcript_011139;Transcript_015701;Transcript_016807;Transcript_023790;Transcript_024392;Transcript_036517;Transcript_042195;Transcript_042857;Transcript_047623;Transcript_130943;Transcript_141684;Transcript_199440;Transcript_226697;Transcript_233011;Transcript_236927;Transcript_237083;Transcript_238705;Transcript_242230;Transcript_244006
ko04922	Glucagon_signaling_pathway	20	7.97473e-12	Transcript_005220;Transcript_006512;Transcript_011423;Transcript_015664;Transcript_024392;Transcript_037817;Transcript_042195;Transcript_043127;Transcript_063609;Transcript_104492;Transcript_132262;Transcript_188373;Transcript_189036;Transcript_189170;Transcript_193456;Transcript_215004;Transcript_216217;Transcript_227948;Transcript_230776;Transcript_237083
ko04931	Insulin_resistance	20	1.37995e-10	Transcript_005547;Transcript_011423;Transcript_023681;Transcript_034685;Transcript_043524;Transcript_047441;Transcript_063609;Transcript_149762;Transcript_154666;Transcript_156614;Transcript_189036;Transcript_202998;Transcript_216217;Transcript_216339;Transcript_225156;Transcript_230386;Transcript_230920;Transcript_231986;Transcript_233398;Transcript_242230
GO:0043066	P:negative_regulation_of_apoptotic_process	19	6.71877e-07	Transcript_003919;Transcript_004120;Transcript_009846;Transcript_012454;Transcript_019691;Transcript_020201;Transcript_023489;Transcript_023790;Transcript_049899;Transcript_056708;Transcript_101332;Transcript_186885;Transcript_196736;Transcript_201011;Transcript_210373;Transcript_231485;Transcript_234015;Transcript_236609;Transcript_240355
GO:0015986	P:ATP_synthesis_coupled_proton_transport	19	1.5046e-08	Transcript_003976;Transcript_006390;Transcript_015653;Transcript_016602;Transcript_019100;Transcript_042379;Transcript_080346;Transcript_102208;Transcript_105369;Transcript_140692;Transcript_148330;Transcript_150169;Transcript_165487;Transcript_181242;Transcript_211190;Transcript_215376;Transcript_218023;Transcript_219153;Transcript_225649
GO:0003887	F:DNA-directed_DNA_polymerase_activity	19	7.77111e-08	Transcript_019818;Transcript_025591;Transcript_032060;Transcript_032348;Transcript_037258;Transcript_042282;Transcript_042565;Transcript_043968;Transcript_045095;Transcript_079313;Transcript_133159;Transcript_141042;Transcript_149605;Transcript_152113;Transcript_152805;Transcript_155116;Transcript_164025;Transcript_186407;Transcript_234110
ko03320	PPAR_signaling_pathway	19	3.10135e-05	Transcript_013641;Transcript_015934;Transcript_028090;Transcript_028424;Transcript_031938;Transcript_055633;Transcript_072738;Transcript_095194;Transcript_111101;Transcript_156614;Transcript_160618;Transcript_169987;Transcript_186076;Transcript_189036;Transcript_192500;Transcript_209162;Transcript_232327;Transcript_233080;Transcript_244642
ko00280	Valine,_leucine_and_isoleucine_degradation	19	8.22872e-18	Transcript_005196;Transcript_028090;Transcript_045618;Transcript_050673;Transcript_053135;Transcript_068373;Transcript_072738;Transcript_103284;Transcript_149735;Transcript_151724;Transcript_160618;Transcript_206114;Transcript_208325;Transcript_211082;Transcript_212121;Transcript_214388;Transcript_227327;Transcript_228339;Transcript_236739
GO:0015992	P:proton_transport	19	5.22577e-10	Transcript_002810;Transcript_014408;Transcript_015361;Transcript_018319;Transcript_018878;Transcript_024398;Transcript_048191;Transcript_056316;Transcript_102803;Transcript_115595;Transcript_152593;Transcript_160320;Transcript_170368;Transcript_174520;Transcript_174874;Transcript_184137;Transcript_204201;Transcript_227873;Transcript_241883
ko00052	Galactose_metabolism	19	1.58104e-12	Transcript_001576;Transcript_013311;Transcript_014047;Transcript_017955;Transcript_018566;Transcript_020714;Transcript_034153;Transcript_036578;Transcript_074885;Transcript_091033;Transcript_113727;Transcript_128118;Transcript_150292;Transcript_171935;Transcript_204880;Transcript_223849;Transcript_229106;Transcript_239705;Transcript_241568
GO:0004519	F:endonuclease_activity	19	3.96967e-20	Transcript_002866;Transcript_009909;Transcript_012036;Transcript_021601;Transcript_032060;Transcript_043219;Transcript_069093;Transcript_090961;Transcript_133159;Transcript_151495;Transcript_151584;Transcript_152805;Transcript_154439;Transcript_164718;Transcript_170075;Transcript_226770;Transcript_229724;Transcript_238953;Transcript_244762
ko00630	Glyoxylate_and_dicarboxylate_metabolism	19	9.81727e-17	Transcript_012770;Transcript_017186;Transcript_020798;Transcript_035652;Transcript_047399;Transcript_051707;Transcript_052823;Transcript_066519;Transcript_077772;Transcript_091674;Transcript_100833;Transcript_151724;Transcript_151947;Transcript_174195;Transcript_185018;Transcript_187487;Transcript_209355;Transcript_223091;Transcript_227327
GO:0080167	P:response_to_karrikin	19	6.16405e-14	Transcript_001576;Transcript_004984;Transcript_012490;Transcript_023213;Transcript_029202;Transcript_044244;Transcript_054816;Transcript_104049;Transcript_106769;Transcript_124889;Transcript_130404;Transcript_150292;Transcript_156621;Transcript_159817;Transcript_214388;Transcript_223849;Transcript_228726;Transcript_233337;Transcript_240107
ko05134	Legionellosis	19	8.65951e-13	Transcript_005796;Transcript_011606;Transcript_016668;Transcript_026609;Transcript_027338;Transcript_027565;Transcript_031964;Transcript_032312;Transcript_037452;Transcript_040010;Transcript_048502;Transcript_064290;Transcript_069354;Transcript_071807;Transcript_103154;Transcript_124669;Transcript_146566;Transcript_164268;Transcript_196563
GO:0010224	P:response_to_UV-B	19	1.89366e-06	Transcript_015634;Transcript_018566;Transcript_022042;Transcript_024465;Transcript_047623;Transcript_079313;Transcript_086024;Transcript_089183;Transcript_089195;Transcript_156136;Transcript_160504;Transcript_195757;Transcript_195900;Transcript_200917;Transcript_203552;Transcript_220474;Transcript_227209;Transcript_228277;Transcript_242340
GO:0008283	P:cell_proliferation	19	5.46199e-15	Transcript_019957;Transcript_023489;Transcript_025603;Transcript_028824;Transcript_031196;Transcript_032764;Transcript_033497;Transcript_034176;Transcript_040637;Transcript_044220;Transcript_072542;Transcript_096227;Transcript_157447;Transcript_164613;Transcript_186407;Transcript_195086;Transcript_195799;Transcript_227907;Transcript_234818
GO:0006950	P:response_to_stress	19	1.5046e-08	Transcript_006963;Transcript_007909;Transcript_008228;Transcript_012241;Transcript_013042;Transcript_015701;Transcript_023019;Transcript_031436;Transcript_032019;Transcript_037382;Transcript_046472;Transcript_092982;Transcript_107093;Transcript_108433;Transcript_189161;Transcript_207858;Transcript_224734;Transcript_225581;Transcript_240436
ko03060	Protein_export	19	6.81507e-12	Transcript_000240;Transcript_002222;Transcript_003919;Transcript_008257;Transcript_012055;Transcript_014392;Transcript_016146;Transcript_025335;Transcript_044726;Transcript_055917;Transcript_083711;Transcript_120833;Transcript_158303;Transcript_185790;Transcript_196849;Transcript_197117;Transcript_201276;Transcript_205458;Transcript_230485
GO:0006508	P:proteolysis	19	9.1711e-12	Transcript_009434;Transcript_013002;Transcript_044038;Transcript_044131;Transcript_045095;Transcript_068703;Transcript_074089;Transcript_093012;Transcript_150822;Transcript_151747;Transcript_153768;Transcript_164508;Transcript_170841;Transcript_186590;Transcript_187936;Transcript_228500;Transcript_229373;Transcript_229743;Transcript_243025
GO:0045490	P:pectin_catabolic_process	19	1.23575e-11	Transcript_010133;Transcript_015471;Transcript_017401;Transcript_022963;Transcript_029575;Transcript_035219;Transcript_038709;Transcript_067062;Transcript_083561;Transcript_083698;Transcript_154751;Transcript_167963;Transcript_198036;Transcript_199053;Transcript_202387;Transcript_230500;Transcript_236222;Transcript_238278;Transcript_239463
GO:0043547	P:positive_regulation_of_GTPase_activity	19	2.13226e-15	Transcript_011873;Transcript_011971;Transcript_012474;Transcript_014357;Transcript_024465;Transcript_028297;Transcript_028467;Transcript_028795;Transcript_031951;Transcript_033506;Transcript_038190;Transcript_043014;Transcript_086024;Transcript_089183;Transcript_118043;Transcript_119865;Transcript_149866;Transcript_150515;Transcript_156136
GO:0030163	P:protein_catabolic_process	19	2.51215e-16	Transcript_004819;Transcript_011546;Transcript_015380;Transcript_025775;Transcript_043469;Transcript_061441;Transcript_085428;Transcript_093012;Transcript_104311;Transcript_133564;Transcript_165401;Transcript_169833;Transcript_184735;Transcript_187936;Transcript_189492;Transcript_193612;Transcript_200725;Transcript_223135;Transcript_229924
GO:0045489	P:pectin_biosynthetic_process	19	5.0234e-05	Transcript_012883;Transcript_016927;Transcript_030209;Transcript_036595;Transcript_041419;Transcript_046042;Transcript_073497;Transcript_074927;Transcript_104797;Transcript_156737;Transcript_161349;Transcript_169923;Transcript_189890;Transcript_191414;Transcript_191623;Transcript_200400;Transcript_233464;Transcript_237763;Transcript_239721
GO:0004721	F:phosphoprotein_phosphatase_activity	19	5.46199e-15	Transcript_006015;Transcript_007951;Transcript_015425;Transcript_015882;Transcript_023681;Transcript_028828;Transcript_097238;Transcript_098802;Transcript_106528;Transcript_110046;Transcript_119628;Transcript_139388;Transcript_151638;Transcript_154666;Transcript_165460;Transcript_173640;Transcript_202823;Transcript_222739;Transcript_238885
GO:0015035	F:protein_disulfide_oxidoreductase_activity	18	1.97059e-14	Transcript_002037;Transcript_015094;Transcript_019328;Transcript_025384;Transcript_032889;Transcript_034152;Transcript_035277;Transcript_037644;Transcript_039350;Transcript_042016;Transcript_043270;Transcript_124957;Transcript_152903;Transcript_201768;Transcript_202215;Transcript_203722;Transcript_211971;Transcript_223905
GO:0035556	P:intracellular_signal_transduction	18	1.0097e-25	Transcript_009742;Transcript_012490;Transcript_014297;Transcript_016397;Transcript_018544;Transcript_021004;Transcript_022658;Transcript_031193;Transcript_046627;Transcript_083718;Transcript_128738;Transcript_149488;Transcript_167765;Transcript_173863;Transcript_211939;Transcript_216217;Transcript_228477;Transcript_242707
GO:0000911	P:cytokinesis_by_cell_plate_formation	18	2.43893e-08	Transcript_003962;Transcript_010897;Transcript_053053;Transcript_055435;Transcript_105213;Transcript_135343;Transcript_160093;Transcript_169676;Transcript_171072;Transcript_175416;Transcript_177201;Transcript_191620;Transcript_195799;Transcript_204764;Transcript_222659;Transcript_224124;Transcript_227992;Transcript_243720
GO:0010467	P:gene_expression	18	1.32246e-07	Transcript_000781;Transcript_016072;Transcript_026774;Transcript_038190;Transcript_043594;Transcript_047481;Transcript_072702;Transcript_084534;Transcript_150591;Transcript_154664;Transcript_168571;Transcript_186885;Transcript_192756;Transcript_196766;Transcript_197498;Transcript_205458;Transcript_209163;Transcript_222197
ko03022	Basal_transcription_factors	18	3.19059e-05	Transcript_004938;Transcript_010969;Transcript_011935;Transcript_037076;Transcript_040271;Transcript_044412;Transcript_048787;Transcript_067779;Transcript_068441;Transcript_122934;Transcript_152619;Transcript_177714;Transcript_196794;Transcript_226722;Transcript_227541;Transcript_227952;Transcript_229655;Transcript_234268
ko04921	Oxytocin_signaling_pathway	18	4.55706e-09	Transcript_008748;Transcript_011423;Transcript_023198;Transcript_023681;Transcript_028243;Transcript_043524;Transcript_047441;Transcript_047623;Transcript_088161;Transcript_154666;Transcript_199440;Transcript_210373;Transcript_216217;Transcript_225598;Transcript_227948;Transcript_230920;Transcript_231986;Transcript_244145
GO:0042542	P:response_to_hydrogen_peroxide	18	1.67012e-07	Transcript_009299;Transcript_016492;Transcript_028700;Transcript_036681;Transcript_043076;Transcript_045385;Transcript_052435;Transcript_052823;Transcript_071807;Transcript_074778;Transcript_094325;Transcript_131665;Transcript_147952;Transcript_165034;Transcript_187034;Transcript_202168;Transcript_228200;Transcript_234367
ko04213	Longevity_regulating_pathway_-_multiple_species	18	2.43893e-08	Transcript_011139;Transcript_011423;Transcript_012770;Transcript_015858;Transcript_021276;Transcript_028700;Transcript_029180;Transcript_036517;Transcript_040010;Transcript_052823;Transcript_071807;Transcript_085015;Transcript_164268;Transcript_174195;Transcript_187487;Transcript_216217;Transcript_221971;Transcript_233011
ko00030	Pentose_phosphate_pathway	18	8.16743e-12	Transcript_013311;Transcript_018771;Transcript_027666;Transcript_034153;Transcript_034155;Transcript_034258;Transcript_036578;Transcript_046002;Transcript_058836;Transcript_061028;Transcript_091033;Transcript_142152;Transcript_179420;Transcript_209140;Transcript_216692;Transcript_224067;Transcript_232270;Transcript_241568
GO:0003746	F:translation_elongation_factor_activity	18	4.82909e-10	Transcript_001670;Transcript_002990;Transcript_004843;Transcript_008748;Transcript_013088;Transcript_014346;Transcript_041535;Transcript_083594;Transcript_103154;Transcript_104763;Transcript_124669;Transcript_152509;Transcript_153643;Transcript_169825;Transcript_226088;Transcript_230108;Transcript_230745;Transcript_242911
ko04068	FoxO_signaling_pathway	18	7.49765e-08	Transcript_003398;Transcript_011423;Transcript_012770;Transcript_016807;Transcript_024392;Transcript_042195;Transcript_047623;Transcript_052823;Transcript_156614;Transcript_174195;Transcript_187487;Transcript_189036;Transcript_199440;Transcript_216217;Transcript_224557;Transcript_236927;Transcript_237083;Transcript_242230
GO:0012505	C:endomembrane_system	18	6.90598e-16	Transcript_003320;Transcript_012422;Transcript_016549;Transcript_017667;Transcript_018358;Transcript_021523;Transcript_023362;Transcript_024398;Transcript_029710;Transcript_033954;Transcript_063881;Transcript_069330;Transcript_096510;Transcript_149260;Transcript_151382;Transcript_175654;Transcript_198876;Transcript_199900
GO:0009751	P:response_to_salicylic_acid	18	4.94933e-14	Transcript_004579;Transcript_010309;Transcript_024473;Transcript_033950;Transcript_036681;Transcript_043650;Transcript_047430;Transcript_053375;Transcript_053538;Transcript_085954;Transcript_101040;Transcript_124696;Transcript_150750;Transcript_172146;Transcript_185779;Transcript_189492;Transcript_198258;Transcript_244174
ko04666	Fc_gamma_R-mediated_phagocytosis	18	5.03575e-16	Transcript_004067;Transcript_023455;Transcript_031577;Transcript_031951;Transcript_032864;Transcript_042857;Transcript_047623;Transcript_088340;Transcript_129190;Transcript_129988;Transcript_141684;Transcript_149739;Transcript_190112;Transcript_193252;Transcript_194999;Transcript_199440;Transcript_229716;Transcript_241205
GO:0032580	C:Golgi_cisterna_membrane	18	4.78289e-09	Transcript_003524;Transcript_006882;Transcript_019848;Transcript_019883;Transcript_037115;Transcript_043198;Transcript_051617;Transcript_075566;Transcript_113745;Transcript_123870;Transcript_125168;Transcript_140003;Transcript_153137;Transcript_174469;Transcript_185395;Transcript_202427;Transcript_232638;Transcript_239154
GO:0009723	P:response_to_ethylene	17	2.45589e-17	Transcript_004579;Transcript_008952;Transcript_041900;Transcript_043650;Transcript_046638;Transcript_091368;Transcript_101040;Transcript_135343;Transcript_166590;Transcript_185779;Transcript_198258;Transcript_210047;Transcript_216653;Transcript_217546;Transcript_218401;Transcript_222945;Transcript_223409
GO:0005811	C:lipid_particle	17	6.82595e-12	Transcript_006512;Transcript_014610;Transcript_015664;Transcript_015934;Transcript_019100;Transcript_028562;Transcript_031964;Transcript_049359;Transcript_050096;Transcript_087162;Transcript_098798;Transcript_102735;Transcript_165487;Transcript_169372;Transcript_181242;Transcript_226282;Transcript_227161
GO:0016055	P:Wnt_signaling_pathway	17	2.51614e-05	Transcript_025702;Transcript_033297;Transcript_035369;Transcript_041385;Transcript_042270;Transcript_048879;Transcript_049359;Transcript_162179;Transcript_172468;Transcript_188882;Transcript_188900;Transcript_193346;Transcript_197721;Transcript_200106;Transcript_203386;Transcript_227925;Transcript_228491
GO:0010287	C:plastoglobule	17	6.92862e-08	Transcript_013729;Transcript_016676;Transcript_017623;Transcript_020208;Transcript_038887;Transcript_042194;Transcript_042701;Transcript_106769;Transcript_109674;Transcript_149248;Transcript_157654;Transcript_208193;Transcript_208579;Transcript_212278;Transcript_230506;Transcript_231057;Transcript_236863
GO:0004175	F:endopeptidase_activity	17	2.51614e-05	Transcript_002519;Transcript_005328;Transcript_012055;Transcript_016053;Transcript_020907;Transcript_041803;Transcript_044038;Transcript_048992;Transcript_160414;Transcript_170841;Transcript_172193;Transcript_193709;Transcript_198258;Transcript_199477;Transcript_201678;Transcript_211140;Transcript_224153
GO:0006869	P:lipid_transport	17	5.34561e-12	Transcript_007960;Transcript_013189;Transcript_041670;Transcript_042864;Transcript_046962;Transcript_049359;Transcript_061651;Transcript_077103;Transcript_081670;Transcript_165651;Transcript_192580;Transcript_202040;Transcript_217546;Transcript_219281;Transcript_222087;Transcript_227161;Transcript_240637
GO:0016226	P:iron-sulfur_cluster_assembly	17	1.88383e-06	Transcript_000380;Transcript_019591;Transcript_042016;Transcript_094309;Transcript_109276;Transcript_133902;Transcript_150444;Transcript_195589;Transcript_196736;Transcript_199905;Transcript_206393;Transcript_206790;Transcript_216965;Transcript_230890;Transcript_234662;Transcript_236609;Transcript_243071
ko00020	Citrate_cycle_(TCA_cycle)	17	2.3246e-21	Transcript_005683;Transcript_007527;Transcript_017186;Transcript_031909;Transcript_033355;Transcript_044843;Transcript_110053;Transcript_132262;Transcript_136668;Transcript_185040;Transcript_187104;Transcript_187708;Transcript_189036;Transcript_193456;Transcript_203431;Transcript_222193;Transcript_227327
GO:0045087	P:innate_immune_response	17	2.43338e-10	Transcript_004120;Transcript_014357;Transcript_014471;Transcript_016072;Transcript_023489;Transcript_026715;Transcript_028467;Transcript_038930;Transcript_056334;Transcript_103871;Transcript_105842;Transcript_145838;Transcript_149560;Transcript_186885;Transcript_189492;Transcript_222197;Transcript_229743
GO:0009617	P:response_to_bacterium	17	5.62449e-10	Transcript_010576;Transcript_028361;Transcript_033196;Transcript_041715;Transcript_047623;Transcript_052435;Transcript_057360;Transcript_060815;Transcript_071807;Transcript_106950;Transcript_154436;Transcript_205797;Transcript_222945;Transcript_224903;Transcript_225582;Transcript_241709;Transcript_241809
ko04022	cGMP-PKG_signaling_pathway	17	6.82595e-12	Transcript_008525;Transcript_019608;Transcript_023681;Transcript_034168;Transcript_043524;Transcript_045165;Transcript_047441;Transcript_047623;Transcript_093127;Transcript_095344;Transcript_154666;Transcript_169578;Transcript_199440;Transcript_227948;Transcript_230920;Transcript_231986;Transcript_233863
GO:0031966	C:mitochondrial_membrane	17	9.84834e-11	Transcript_020282;Transcript_020969;Transcript_024991;Transcript_026698;Transcript_028443;Transcript_034536;Transcript_044397;Transcript_101286;Transcript_196980;Transcript_198631;Transcript_219022;Transcript_222418;Transcript_222677;Transcript_236702;Transcript_241709;Transcript_241809;Transcript_241991
ko04211	Longevity_regulating_pathway	17	7.22965e-08	Transcript_011423;Transcript_012770;Transcript_021276;Transcript_023198;Transcript_028243;Transcript_043672;Transcript_052823;Transcript_062178;Transcript_153520;Transcript_173665;Transcript_173779;Transcript_174195;Transcript_187487;Transcript_216217;Transcript_221971;Transcript_225598;Transcript_244145
GO:0010200	P:response_to_chitin	17	1.97621e-18	Transcript_001711;Transcript_004579;Transcript_005368;Transcript_010049;Transcript_028361;Transcript_036696;Transcript_038744;Transcript_040863;Transcript_043650;Transcript_047623;Transcript_060815;Transcript_065706;Transcript_111801;Transcript_158761;Transcript_170551;Transcript_227513;Transcript_244048
ko00071	Fatty_acid_degradation	17	5.45606e-14	Transcript_007351;Transcript_015934;Transcript_028090;Transcript_028424;Transcript_030915;Transcript_072738;Transcript_095194;Transcript_151724;Transcript_160618;Transcript_162032;Transcript_169987;Transcript_186076;Transcript_192500;Transcript_206114;Transcript_212121;Transcript_227823;Transcript_232327
GO:0042981	P:regulation_of_apoptotic_process	17	0.00582387	Transcript_006757;Transcript_012893;Transcript_014297;Transcript_030486;Transcript_031964;Transcript_069251;Transcript_070575;Transcript_086608;Transcript_151330;Transcript_155512;Transcript_168093;Transcript_170156;Transcript_186885;Transcript_194105;Transcript_229781;Transcript_236927;Transcript_238155
GO:0019005	C:SCF_ubiquitin_ligase_complex	17	5.27882e-05	Transcript_001927;Transcript_003398;Transcript_010389;Transcript_016103;Transcript_022749;Transcript_024774;Transcript_025603;Transcript_035428;Transcript_038302;Transcript_048789;Transcript_065703;Transcript_129322;Transcript_134528;Transcript_141551;Transcript_148803;Transcript_227907;Transcript_243718
GO:0044267	P:cellular_protein_metabolic_process	17	0.000383542	Transcript_026511;Transcript_026774;Transcript_034685;Transcript_036735;Transcript_038190;Transcript_042164;Transcript_043594;Transcript_047481;Transcript_137510;Transcript_170169;Transcript_187317;Transcript_192756;Transcript_196849;Transcript_205458;Transcript_209163;Transcript_234247;Transcript_235503
GO:0003682	F:chromatin_binding	17	2.43338e-10	Transcript_007485;Transcript_016154;Transcript_024465;Transcript_029854;Transcript_029929;Transcript_043946;Transcript_062005;Transcript_086024;Transcript_089183;Transcript_096014;Transcript_141447;Transcript_149881;Transcript_156136;Transcript_184279;Transcript_189510;Transcript_200415;Transcript_209767
GO:0018298	P:protein-chromophore_linkage	17	7.41489e-14	Transcript_004378;Transcript_007421;Transcript_013668;Transcript_021843;Transcript_022303;Transcript_024465;Transcript_035817;Transcript_042701;Transcript_065295;Transcript_086024;Transcript_089183;Transcript_106769;Transcript_113812;Transcript_156000;Transcript_156136;Transcript_176965;Transcript_243012
GO:0031201	C:SNARE_complex	17	3.12387e-11	Transcript_012881;Transcript_016956;Transcript_017670;Transcript_037452;Transcript_038952;Transcript_040509;Transcript_069330;Transcript_077148;Transcript_090487;Transcript_155836;Transcript_174694;Transcript_175654;Transcript_198876;Transcript_212752;Transcript_224504;Transcript_230474;Transcript_244730
GO:0042787	P:protein_ubiquitination_involved_in_ubiquitin-dependent_protein_catabolic_process	17	6.22847e-07	Transcript_006933;Transcript_031110;Transcript_051439;Transcript_053673;Transcript_089108;Transcript_143107;Transcript_158397;Transcript_160315;Transcript_169395;Transcript_174453;Transcript_183403;Transcript_186094;Transcript_188612;Transcript_203093;Transcript_209655;Transcript_214887;Transcript_232803
ko04212	Longevity_regulating_pathway_-_worm	16	9.48721e-18	Transcript_012770;Transcript_016668;Transcript_021946;Transcript_025157;Transcript_033551;Transcript_047691;Transcript_052823;Transcript_060720;Transcript_100629;Transcript_174195;Transcript_187487;Transcript_209520;Transcript_222659;Transcript_224557;Transcript_234113;Transcript_242230
GO:0043022	F:ribosome_binding	16	1.49591e-05	Transcript_003919;Transcript_008117;Transcript_009846;Transcript_013587;Transcript_020812;Transcript_040561;Transcript_041704;Transcript_049899;Transcript_104763;Transcript_157447;Transcript_196575;Transcript_197517;Transcript_205655;Transcript_230108;Transcript_230745;Transcript_233979
GO:0003333	P:amino_acid_transmembrane_transport	16	3.19713e-05	Transcript_009106;Transcript_014614;Transcript_016186;Transcript_022464;Transcript_027093;Transcript_028356;Transcript_030947;Transcript_035838;Transcript_050253;Transcript_051885;Transcript_154795;Transcript_160126;Transcript_161599;Transcript_183390;Transcript_198712;Transcript_235331
GO:0003993	F:acid_phosphatase_activity	16	4.15232e-05	Transcript_010467;Transcript_014143;Transcript_016492;Transcript_028942;Transcript_098453;Transcript_146184;Transcript_148133;Transcript_154853;Transcript_158442;Transcript_170640;Transcript_192151;Transcript_209877;Transcript_221483;Transcript_226110;Transcript_229751;Transcript_234367
ko01210	2-Oxocarboxylic_acid_metabolism	16	6.47129e-11	Transcript_002106;Transcript_005196;Transcript_017186;Transcript_031557;Transcript_044843;Transcript_049636;Transcript_053135;Transcript_103284;Transcript_110053;Transcript_130536;Transcript_161218;Transcript_185040;Transcript_187708;Transcript_203431;Transcript_211082;Transcript_233913
GO:0031965	C:nuclear_membrane_	16	1.5983e-13	Transcript_008327;Transcript_009106;Transcript_020539;Transcript_022464;Transcript_023503;Transcript_027321;Transcript_050253;Transcript_066093;Transcript_150565;Transcript_172959;Transcript_201375;Transcript_203430;Transcript_211082;Transcript_216128;Transcript_234329;Transcript_244006
GO:0006888	P:ER_to_Golgi_vesicle-mediated_transport	16	1.99938e-15	Transcript_012474;Transcript_018689;Transcript_020271;Transcript_023927;Transcript_031964;Transcript_034210;Transcript_041095;Transcript_043014;Transcript_044796;Transcript_108075;Transcript_119575;Transcript_163943;Transcript_174694;Transcript_187317;Transcript_222411;Transcript_244730
ko05231	Choline_metabolism_in_cancer	16	2.73591e-18	Transcript_004067;Transcript_012368;Transcript_016010;Transcript_023455;Transcript_031577;Transcript_042857;Transcript_047623;Transcript_073742;Transcript_129190;Transcript_141684;Transcript_149739;Transcript_152989;Transcript_156614;Transcript_199440;Transcript_229716;Transcript_241205
ko04210	Apoptosis	16	1.34273e-06	Transcript_006096;Transcript_012650;Transcript_023633;Transcript_024473;Transcript_041704;Transcript_047623;Transcript_052646;Transcript_088161;Transcript_137032;Transcript_156614;Transcript_199440;Transcript_205655;Transcript_222659;Transcript_228587;Transcript_229002;Transcript_244174
GO:0009607	P:response_to_biotic_stimulus_	16	1.15402e-07	Transcript_015752;Transcript_025942;Transcript_025969;Transcript_032258;Transcript_032870;Transcript_041364;Transcript_042251;Transcript_044777;Transcript_052360;Transcript_065821;Transcript_071983;Transcript_150053;Transcript_154382;Transcript_166148;Transcript_188974;Transcript_201045
ko04341	Hedgehog_signaling_pathway_-_fly	16	4.89274e-08	Transcript_010389;Transcript_024752;Transcript_027923;Transcript_028007;Transcript_031110;Transcript_033297;Transcript_041585;Transcript_043420;Transcript_105439;Transcript_112850;Transcript_174237;Transcript_174453;Transcript_200106;Transcript_203354;Transcript_214887;Transcript_227246
GO:0005200	F:structural_constituent_of_cytoskeleton	16	1.52924e-10	Transcript_006853;Transcript_012650;Transcript_014610;Transcript_025469;Transcript_032610;Transcript_033472;Transcript_063860;Transcript_088161;Transcript_103380;Transcript_197380;Transcript_212311;Transcript_215001;Transcript_225969;Transcript_228587;Transcript_229002;Transcript_238919
GO:0004177	F:aminopeptidase_activity	16	1.06294e-06	Transcript_003627;Transcript_010715;Transcript_015867;Transcript_026918;Transcript_043543;Transcript_045246;Transcript_046620;Transcript_054888;Transcript_088596;Transcript_138719;Transcript_145907;Transcript_170494;Transcript_171013;Transcript_173800;Transcript_190242;Transcript_243143
GO:0030599	F:pectinesterase_activity	16	8.94077e-09	Transcript_015471;Transcript_017401;Transcript_022963;Transcript_029575;Transcript_031230;Transcript_038709;Transcript_066009;Transcript_083561;Transcript_083698;Transcript_154751;Transcript_159817;Transcript_167963;Transcript_199053;Transcript_202387;Transcript_236222;Transcript_239463
ko00510	N-Glycan_biosynthesis	16	6.88357e-10	Transcript_004469;Transcript_004775;Transcript_015282;Transcript_019295;Transcript_026511;Transcript_048209;Transcript_065665;Transcript_149321;Transcript_157849;Transcript_170169;Transcript_171029;Transcript_192756;Transcript_193176;Transcript_219435;Transcript_229590;Transcript_234247
ko04260	Cardiac_muscle_contraction	16	0.000313574	Transcript_004875;Transcript_005630;Transcript_017791;Transcript_018890;Transcript_021261;Transcript_028854;Transcript_036111;Transcript_038425;Transcript_041726;Transcript_045657;Transcript_060091;Transcript_099939;Transcript_158785;Transcript_213769;Transcript_230128;Transcript_244147
GO:0008234	F:cysteine-type_peptidase_activity	16	1.16114e-13	Transcript_003383;Transcript_008420;Transcript_012532;Transcript_029670;Transcript_029766;Transcript_030627;Transcript_035021;Transcript_043350;Transcript_121332;Transcript_149633;Transcript_158529;Transcript_163873;Transcript_164020;Transcript_179548;Transcript_199957;Transcript_242031
GO:0004185	F:serine-type_carboxypeptidase_activity	16	7.13665e-15	Transcript_000791;Transcript_010073;Transcript_013002;Transcript_021677;Transcript_023520;Transcript_024498;Transcript_029534;Transcript_041784;Transcript_043829;Transcript_050046;Transcript_076012;Transcript_118753;Transcript_127638;Transcript_179122;Transcript_186590;Transcript_230396
GO:0048366	P:leaf_development	16	2.39328e-14	Transcript_029010;Transcript_029817;Transcript_031558;Transcript_038113;Transcript_052435;Transcript_133564;Transcript_152679;Transcript_167303;Transcript_168472;Transcript_184034;Transcript_194978;Transcript_195253;Transcript_223409;Transcript_228477;Transcript_229743;Transcript_238099
GO:0003756	F:protein_disulfide_isomerase_activity	16	0.00100762	Transcript_009857;Transcript_017048;Transcript_018820;Transcript_025914;Transcript_031666;Transcript_032576;Transcript_032936;Transcript_034152;Transcript_056651;Transcript_062148;Transcript_150412;Transcript_151583;Transcript_168167;Transcript_172156;Transcript_199256;Transcript_242801
ko04072	Phospholipase_D_signaling_pathway	16	7.12388e-13	Transcript_004067;Transcript_005796;Transcript_012368;Transcript_017685;Transcript_023455;Transcript_026609;Transcript_027565;Transcript_031577;Transcript_047623;Transcript_048502;Transcript_129190;Transcript_149739;Transcript_152989;Transcript_199440;Transcript_229716;Transcript_241205
GO:0006306	P:DNA_methylation	16	0.0062138	Transcript_011320;Transcript_016154;Transcript_030994;Transcript_033998;Transcript_042738;Transcript_093232;Transcript_096996;Transcript_149881;Transcript_164613;Transcript_168654;Transcript_184279;Transcript_186407;Transcript_190420;Transcript_213248;Transcript_222659;Transcript_230510
ko00040	Pentose_and_glucuronate_interconversions	16	1.45929e-15	Transcript_008664;Transcript_010133;Transcript_015471;Transcript_017401;Transcript_029575;Transcript_038709;Transcript_067062;Transcript_083698;Transcript_132060;Transcript_142152;Transcript_167963;Transcript_206114;Transcript_212121;Transcript_234086;Transcript_236222;Transcript_242467
GO:0008017	F:microtubule_binding	16	1.59976e-08	Transcript_008054;Transcript_028554;Transcript_030766;Transcript_033907;Transcript_049359;Transcript_053053;Transcript_070575;Transcript_097854;Transcript_105213;Transcript_150488;Transcript_160093;Transcript_222411;Transcript_224124;Transcript_224557;Transcript_227772;Transcript_232508
GO:0009860	P:pollen_tube_growth	16	2.59218e-11	Transcript_002525;Transcript_018544;Transcript_023111;Transcript_028530;Transcript_033841;Transcript_064290;Transcript_079138;Transcript_151724;Transcript_160559;Transcript_174866;Transcript_181058;Transcript_192811;Transcript_201012;Transcript_225459;Transcript_232859;Transcript_242855
GO:0022857	F:transmembrane_transporter_activity	16	6.15037e-14	Transcript_007607;Transcript_009479;Transcript_018935;Transcript_019857;Transcript_023500;Transcript_037763;Transcript_042281;Transcript_042456;Transcript_045823;Transcript_173256;Transcript_183101;Transcript_223677;Transcript_225112;Transcript_229791;Transcript_242346;Transcript_243936
GO:0000785	C:chromatin_	16	3.75818e-10	Transcript_024465;Transcript_029929;Transcript_036142;Transcript_036517;Transcript_086024;Transcript_089183;Transcript_096227;Transcript_099411;Transcript_143133;Transcript_154412;Transcript_156136;Transcript_185779;Transcript_199001;Transcript_209767;Transcript_214132;Transcript_233011
GO:0008233	F:peptidase_activity	16	3.17947e-12	Transcript_020793;Transcript_025335;Transcript_025591;Transcript_029707;Transcript_030949;Transcript_032348;Transcript_045095;Transcript_075306;Transcript_093012;Transcript_149605;Transcript_164718;Transcript_166179;Transcript_185260;Transcript_185790;Transcript_187936;Transcript_229724
ko00562	Inositol_phosphate_metabolism	15	3.20553e-13	Transcript_010331;Transcript_022710;Transcript_024269;Transcript_030019;Transcript_033079;Transcript_041983;Transcript_062267;Transcript_096467;Transcript_128738;Transcript_149739;Transcript_155584;Transcript_160090;Transcript_186481;Transcript_227392;Transcript_242230
GO:0009909	P:regulation_of_flower_development	15	1.32555e-17	Transcript_004587;Transcript_027199;Transcript_033045;Transcript_041388;Transcript_042458;Transcript_042738;Transcript_043997;Transcript_044732;Transcript_162985;Transcript_175659;Transcript_186407;Transcript_193437;Transcript_205797;Transcript_222659;Transcript_231039
GO:0005813	C:centrosome_	15	5.61395e-07	Transcript_016072;Transcript_020907;Transcript_034615;Transcript_043191;Transcript_088363;Transcript_108137;Transcript_133902;Transcript_149740;Transcript_155861;Transcript_156034;Transcript_168817;Transcript_222411;Transcript_223248;Transcript_226188;Transcript_234015
ko05205	Proteoglycans_in_cancer	15	2.21277e-15	Transcript_008058;Transcript_023681;Transcript_042857;Transcript_043524;Transcript_047441;Transcript_047623;Transcript_088161;Transcript_101332;Transcript_141684;Transcript_154666;Transcript_156614;Transcript_159420;Transcript_199440;Transcript_230920;Transcript_231986
GO:0010468	P:regulation_of_gene_expression	15	5.33363e-05	Transcript_018681;Transcript_035219;Transcript_037258;Transcript_040271;Transcript_043594;Transcript_060720;Transcript_087162;Transcript_113812;Transcript_150296;Transcript_152640;Transcript_156971;Transcript_197376;Transcript_200447;Transcript_230500;Transcript_235815
ko05164	Influenza_A	15	1.34007e-10	Transcript_004120;Transcript_024392;Transcript_028118;Transcript_040010;Transcript_041704;Transcript_042195;Transcript_047623;Transcript_066093;Transcript_071807;Transcript_088161;Transcript_164268;Transcript_199440;Transcript_203430;Transcript_205655;Transcript_237083
GO:0009624	P:response_to_nematode	15	3.20553e-13	Transcript_001681;Transcript_008627;Transcript_011220;Transcript_014614;Transcript_033582;Transcript_035564;Transcript_053053;Transcript_104049;Transcript_105213;Transcript_142152;Transcript_167963;Transcript_169398;Transcript_196551;Transcript_199976;Transcript_205797
GO:0006915	P:apoptotic_process	15	2.24808e-11	Transcript_000579;Transcript_008327;Transcript_009321;Transcript_015286;Transcript_021459;Transcript_036197;Transcript_040271;Transcript_075913;Transcript_092054;Transcript_101332;Transcript_108137;Transcript_186885;Transcript_209425;Transcript_225156;Transcript_242230
ko00061	Fatty_acid_biosynthesis	15	3.37683e-10	Transcript_010061;Transcript_015934;Transcript_028424;Transcript_028726;Transcript_080382;Transcript_090548;Transcript_165162;Transcript_169987;Transcript_192500;Transcript_204425;Transcript_228819;Transcript_232230;Transcript_232327;Transcript_233389;Transcript_242079
GO:0016758	F:transferase_activity,_transferring_hexosyl_groups	15	1.82156e-10	Transcript_002117;Transcript_008602;Transcript_024494;Transcript_036735;Transcript_046725;Transcript_048209;Transcript_073308;Transcript_079388;Transcript_111298;Transcript_135452;Transcript_191884;Transcript_201263;Transcript_214062;Transcript_230831;Transcript_237856
GO:0007346	P:regulation_of_mitotic_cell_cycle	15	0.0162532	Transcript_014297;Transcript_030486;Transcript_069251;Transcript_086608;Transcript_097307;Transcript_151330;Transcript_155512;Transcript_168093;Transcript_170156;Transcript_179708;Transcript_203093;Transcript_229005;Transcript_234015;Transcript_236927;Transcript_238155
GO:0008033	P:tRNA_processing	15	0.000244326	Transcript_004587;Transcript_013457;Transcript_027199;Transcript_036090;Transcript_041620;Transcript_042834;Transcript_083364;Transcript_151495;Transcript_156668;Transcript_159420;Transcript_179008;Transcript_195756;Transcript_198996;Transcript_200390;Transcript_241438
ko04510	Focal_adhesion	15	3.20308e-10	Transcript_023681;Transcript_042857;Transcript_043524;Transcript_047441;Transcript_047623;Transcript_088161;Transcript_141684;Transcript_154666;Transcript_156614;Transcript_199440;Transcript_230920;Transcript_231986;Transcript_238705;Transcript_238732;Transcript_242230
GO:0006413	P:translational_initiation	15	0.000519453	Transcript_014979;Transcript_026774;Transcript_031558;Transcript_038190;Transcript_040561;Transcript_041704;Transcript_043594;Transcript_087162;Transcript_100799;Transcript_150296;Transcript_173665;Transcript_197376;Transcript_203024;Transcript_205655;Transcript_209163
ko04919	Thyroid_hormone_signaling_pathway	15	1.97789e-12	Transcript_011139;Transcript_019060;Transcript_024269;Transcript_024392;Transcript_036517;Transcript_042195;Transcript_047623;Transcript_062267;Transcript_088161;Transcript_128738;Transcript_156614;Transcript_199440;Transcript_201800;Transcript_233011;Transcript_237083
GO:0030136	C:clathrin-coated_vesicle_	15	8.95175e-05	Transcript_003176;Transcript_007188;Transcript_014631;Transcript_016371;Transcript_023455;Transcript_042319;Transcript_045744;Transcript_098689;Transcript_167014;Transcript_175485;Transcript_178285;Transcript_193908;Transcript_238068;Transcript_241205;Transcript_243720
GO:0010091	P:trichome_branching	15	0.000403922	Transcript_018886;Transcript_051439;Transcript_056416;Transcript_076341;Transcript_084439;Transcript_089102;Transcript_089108;Transcript_150488;Transcript_155116;Transcript_203552;Transcript_209023;Transcript_209655;Transcript_227945;Transcript_232803;Transcript_239651
ko04066	HIF-1_signaling_pathway	15	8.18348e-09	Transcript_018566;Transcript_023260;Transcript_024392;Transcript_030924;Transcript_042195;Transcript_043672;Transcript_047623;Transcript_063511;Transcript_132262;Transcript_151402;Transcript_173665;Transcript_193456;Transcript_199440;Transcript_222948;Transcript_237083
GO:0005905	C:coated_pit_	15	5.33363e-05	Transcript_003176;Transcript_007188;Transcript_014631;Transcript_016371;Transcript_039901;Transcript_045744;Transcript_053642;Transcript_098689;Transcript_167014;Transcript_175485;Transcript_178285;Transcript_198286;Transcript_232922;Transcript_238068;Transcript_243030
GO:0009615	P:response_to_virus	15	0.000314113	Transcript_004120;Transcript_010186;Transcript_010897;Transcript_012502;Transcript_014088;Transcript_016022;Transcript_023198;Transcript_028243;Transcript_059207;Transcript_071807;Transcript_124696;Transcript_164268;Transcript_171072;Transcript_225598;Transcript_244145
ko04390	Hippo_signaling_pathway	15	5.61395e-07	Transcript_008779;Transcript_015425;Transcript_016618;Transcript_023681;Transcript_027594;Transcript_043524;Transcript_047441;Transcript_079199;Transcript_088161;Transcript_095402;Transcript_145801;Transcript_154666;Transcript_204486;Transcript_230920;Transcript_231986
GO:0046835	P:carbohydrate_phosphorylation	15	0.01972	Transcript_009113;Transcript_013311;Transcript_018345;Transcript_024848;Transcript_024940;Transcript_029681;Transcript_034153;Transcript_036578;Transcript_091033;Transcript_150144;Transcript_152044;Transcript_188373;Transcript_188805;Transcript_241568;Transcript_242467
GO:0005770	C:late_endosome	15	3.22041e-05	Transcript_008058;Transcript_029010;Transcript_031641;Transcript_038930;Transcript_042319;Transcript_077629;Transcript_083038;Transcript_087118;Transcript_095601;Transcript_109160;Transcript_126621;Transcript_156034;Transcript_170293;Transcript_172485;Transcript_232583
GO:0008422	F:beta-glucosidase_activity	15	1.0981e-07	Transcript_001347;Transcript_007067;Transcript_012703;Transcript_013507;Transcript_017860;Transcript_041698;Transcript_044180;Transcript_044610;Transcript_079098;Transcript_090025;Transcript_151025;Transcript_181848;Transcript_192863;Transcript_193811;Transcript_234966
GO:0048544	P:recognition_of_pollen	15	3.28614e-07	Transcript_000155;Transcript_004316;Transcript_018442;Transcript_026712;Transcript_028087;Transcript_035998;Transcript_038148;Transcript_038457;Transcript_061432;Transcript_137392;Transcript_179084;Transcript_192737;Transcript_226768;Transcript_233702;Transcript_242254
GO:0019898	C:extrinsic_component_of_membrane	15	1.48724e-08	Transcript_004788;Transcript_014566;Transcript_021310;Transcript_028562;Transcript_032957;Transcript_036840;Transcript_043347;Transcript_083601;Transcript_103059;Transcript_158268;Transcript_162684;Transcript_175104;Transcript_194665;Transcript_224557;Transcript_227496
ko05120	Epithelial_cell_signaling_in_Helicobacter_pylori_infection	15	1.82156e-10	Transcript_009551;Transcript_014408;Transcript_016602;Transcript_024398;Transcript_028670;Transcript_030029;Transcript_042857;Transcript_073956;Transcript_141684;Transcript_183515;Transcript_190353;Transcript_205656;Transcript_218023;Transcript_227873;Transcript_240650
GO:0051028	P:mRNA_transport	15	2.69323e-14	Transcript_005349;Transcript_007788;Transcript_012127;Transcript_042225;Transcript_046417;Transcript_048788;Transcript_055527;Transcript_066093;Transcript_098798;Transcript_107673;Transcript_175706;Transcript_180857;Transcript_203430;Transcript_209201;Transcript_244006
GO:0005741	C:mitochondrial_outer_membrane_	15	3.37683e-10	Transcript_005656;Transcript_007693;Transcript_008525;Transcript_012454;Transcript_015934;Transcript_019608;Transcript_020323;Transcript_021056;Transcript_034168;Transcript_050536;Transcript_095344;Transcript_111101;Transcript_186581;Transcript_209949;Transcript_224735
ko05323	Rheumatoid_arthritis	15	1.71764e-06	Transcript_009551;Transcript_014408;Transcript_016492;Transcript_016602;Transcript_024398;Transcript_028670;Transcript_030029;Transcript_073956;Transcript_183515;Transcript_190353;Transcript_205656;Transcript_218023;Transcript_227873;Transcript_234367;Transcript_240650
GO:0006006	P:glucose_metabolic_process	15	8.18348e-09	Transcript_010592;Transcript_017046;Transcript_017955;Transcript_029726;Transcript_030924;Transcript_096431;Transcript_117041;Transcript_128232;Transcript_151402;Transcript_155850;Transcript_189852;Transcript_220463;Transcript_222948;Transcript_229106;Transcript_232270
ko04261	Adrenergic_signaling_in_cardiomyocytes	15	1.10267e-08	Transcript_007119;Transcript_008779;Transcript_015425;Transcript_023681;Transcript_043524;Transcript_043723;Transcript_047441;Transcript_047623;Transcript_079199;Transcript_093127;Transcript_095402;Transcript_154666;Transcript_199440;Transcript_230920;Transcript_231986
GO:0042973	F:glucan_endo-1,3-beta-D-glucosidase_activity	15	2.50967e-09	Transcript_007601;Transcript_008767;Transcript_012278;Transcript_015541;Transcript_015614;Transcript_018014;Transcript_020297;Transcript_020974;Transcript_128269;Transcript_197339;Transcript_200774;Transcript_220101;Transcript_221387;Transcript_225833;Transcript_231204
GO:0044212	F:transcription_regulatory_region_DNA_binding	15	1.78189e-16	Transcript_018258;Transcript_035517;Transcript_036681;Transcript_038744;Transcript_040537;Transcript_043724;Transcript_058742;Transcript_097126;Transcript_149429;Transcript_169232;Transcript_204787;Transcript_207832;Transcript_214469;Transcript_216937;Transcript_232361
GO:0015995	P:chlorophyll_biosynthetic_process	15	1.34007e-10	Transcript_006815;Transcript_011583;Transcript_015976;Transcript_023464;Transcript_027262;Transcript_029246;Transcript_035659;Transcript_037447;Transcript_044209;Transcript_046674;Transcript_099826;Transcript_116401;Transcript_129896;Transcript_222450;Transcript_232290
GO:0000145	C:exocyst	15	0.0159424	Transcript_017157;Transcript_022427;Transcript_027013;Transcript_029611;Transcript_034485;Transcript_053323;Transcript_086729;Transcript_114811;Transcript_140313;Transcript_142757;Transcript_189744;Transcript_196737;Transcript_203560;Transcript_232552;Transcript_238290
GO:0031418	F:L-ascorbic_acid_binding_	15	1.50445e-05	Transcript_000599;Transcript_014375;Transcript_033024;Transcript_041453;Transcript_042760;Transcript_110200;Transcript_128369;Transcript_145284;Transcript_161810;Transcript_165002;Transcript_165238;Transcript_187044;Transcript_187664;Transcript_201782;Transcript_237341
GO:0004222	F:metalloendopeptidase_activity	15	1.23267e-13	Transcript_007313;Transcript_016279;Transcript_020969;Transcript_026698;Transcript_034339;Transcript_043469;Transcript_044038;Transcript_072465;Transcript_085428;Transcript_089195;Transcript_090672;Transcript_187872;Transcript_201678;Transcript_222677;Transcript_238793
GO:0030244	P:cellulose_biosynthetic_process	14	6.65193e-17	Transcript_006525;Transcript_011644;Transcript_015028;Transcript_015340;Transcript_023383;Transcript_036895;Transcript_042756;Transcript_055435;Transcript_161067;Transcript_184628;Transcript_219435;Transcript_222855;Transcript_231441;Transcript_236780
ko04014	Ras_signaling_pathway	14	1.81423e-11	Transcript_004067;Transcript_017157;Transcript_023455;Transcript_031577;Transcript_042857;Transcript_047623;Transcript_129190;Transcript_141684;Transcript_161256;Transcript_199440;Transcript_203560;Transcript_229716;Transcript_236927;Transcript_241205
GO:0004129	F:cytochrome-c_oxidase_activity	14	2.45971e-05	Transcript_005630;Transcript_015693;Transcript_017791;Transcript_018890;Transcript_021261;Transcript_028854;Transcript_032550;Transcript_036111;Transcript_045657;Transcript_060091;Transcript_099939;Transcript_158785;Transcript_164716;Transcript_244147
GO:0006811	P:ion_transport	14	9.55051e-14	Transcript_018935;Transcript_031279;Transcript_041715;Transcript_077393;Transcript_078057;Transcript_088056;Transcript_097850;Transcript_119404;Transcript_128888;Transcript_187944;Transcript_196551;Transcript_213067;Transcript_219439;Transcript_224735
GO:0046961	F:proton-transporting_ATPase_activity,_rotational_mechanism	14	4.23027e-08	Transcript_003976;Transcript_016602;Transcript_019100;Transcript_028670;Transcript_030029;Transcript_037065;Transcript_102208;Transcript_105369;Transcript_140692;Transcript_205656;Transcript_215376;Transcript_218023;Transcript_225649;Transcript_240650
GO:0005643	C:nuclear_pore	14	1.28395e-08	Transcript_014168;Transcript_042225;Transcript_046417;Transcript_055527;Transcript_066093;Transcript_087118;Transcript_107673;Transcript_166987;Transcript_175706;Transcript_203430;Transcript_209201;Transcript_214753;Transcript_244006;Transcript_244446
ko00600	Sphingolipid_metabolism	14	3.69654e-06	Transcript_006151;Transcript_014047;Transcript_041445;Transcript_042796;Transcript_108668;Transcript_113727;Transcript_123202;Transcript_128118;Transcript_152714;Transcript_174866;Transcript_184122;Transcript_194130;Transcript_204880;Transcript_230670
GO:0000149	F:SNARE_binding	14	5.42278e-08	Transcript_012881;Transcript_016956;Transcript_037452;Transcript_038952;Transcript_069330;Transcript_077148;Transcript_090487;Transcript_155836;Transcript_156034;Transcript_174694;Transcript_175654;Transcript_198876;Transcript_224504;Transcript_244730
ko04920	Adipocytokine_signaling_pathway	14	3.23504e-05	Transcript_011423;Transcript_015934;Transcript_023198;Transcript_028243;Transcript_028424;Transcript_062178;Transcript_169987;Transcript_173779;Transcript_189036;Transcript_192500;Transcript_216217;Transcript_225598;Transcript_232327;Transcript_244145
GO:0006342	P:chromatin_silencing	14	0.106576	Transcript_016154;Transcript_016829;Transcript_030874;Transcript_030994;Transcript_033998;Transcript_036517;Transcript_042738;Transcript_093232;Transcript_149881;Transcript_168654;Transcript_179685;Transcript_184279;Transcript_229005;Transcript_233011
GO:0051087	F:chaperone_binding	14	0.00287368	Transcript_002237;Transcript_006757;Transcript_007908;Transcript_010660;Transcript_044265;Transcript_046510;Transcript_056822;Transcript_094276;Transcript_133402;Transcript_133902;Transcript_137510;Transcript_197508;Transcript_207858;Transcript_242567
GO:0043621	F:protein_self-association	14	3.13024e-07	Transcript_007556;Transcript_011320;Transcript_014566;Transcript_027868;Transcript_032934;Transcript_032936;Transcript_056651;Transcript_068323;Transcript_098798;Transcript_114161;Transcript_144829;Transcript_165632;Transcript_218802;Transcript_227496
GO:0009636	P:response_to_toxic_substance	14	2.79503e-06	Transcript_004917;Transcript_017334;Transcript_027150;Transcript_028226;Transcript_033768;Transcript_048483;Transcript_049193;Transcript_132357;Transcript_188426;Transcript_195757;Transcript_198319;Transcript_217539;Transcript_220510;Transcript_244801
GO:0016706	F:oxidoreductase_activity,_acting_on_paired_donors,_with_incorporation_or_reduction_of_molecular_oxygen,_2-oxoglutarate_as_one_donor,_and_incorporation_of_one_atom_each_of_oxygen_into_both_donors	14	1.66692e-06	Transcript_000599;Transcript_027438;Transcript_028094;Transcript_037647;Transcript_041453;Transcript_060149;Transcript_082797;Transcript_164835;Transcript_165002;Transcript_175114;Transcript_187420;Transcript_202132;Transcript_204500;Transcript_234626
GO:0006446	P:regulation_of_translational_initiation	14	1.72719e-08	Transcript_007023;Transcript_031321;Transcript_031853;Transcript_100799;Transcript_158371;Transcript_159811;Transcript_181439;Transcript_196649;Transcript_197517;Transcript_203024;Transcript_209163;Transcript_211481;Transcript_238208;Transcript_243390
GO:0010181	F:FMN_binding	14	9.69037e-08	Transcript_018274;Transcript_020798;Transcript_024991;Transcript_043006;Transcript_045642;Transcript_059088;Transcript_069743;Transcript_072542;Transcript_091674;Transcript_171561;Transcript_179003;Transcript_185018;Transcript_195086;Transcript_209010
GO:0030176	C:integral_component_of_endoplasmic_reticulum_membrane	14	2.1151e-06	Transcript_002222;Transcript_003919;Transcript_018389;Transcript_019295;Transcript_026511;Transcript_030487;Transcript_047481;Transcript_123202;Transcript_193534;Transcript_197117;Transcript_201678;Transcript_230670;Transcript_235413;Transcript_235503
GO:0007059	P:chromosome_segregation	14	1.42417e-05	Transcript_018911;Transcript_024752;Transcript_027923;Transcript_028007;Transcript_041585;Transcript_057704;Transcript_079199;Transcript_105439;Transcript_177955;Transcript_189510;Transcript_190714;Transcript_197376;Transcript_230389;Transcript_236391
ko00565	Ether_lipid_metabolism	14	3.69654e-06	Transcript_004067;Transcript_005080;Transcript_023455;Transcript_024269;Transcript_031577;Transcript_042453;Transcript_062267;Transcript_102735;Transcript_129190;Transcript_135001;Transcript_226282;Transcript_229716;Transcript_234081;Transcript_241205
GO:0009820	P:alkaloid_metabolic_process	14	0.0326271	Transcript_024391;Transcript_027438;Transcript_029229;Transcript_042352;Transcript_047379;Transcript_057859;Transcript_120478;Transcript_136057;Transcript_143038;Transcript_164835;Transcript_184868;Transcript_187420;Transcript_198032;Transcript_234626
GO:0030496	C:midbody	14	0.300358	Transcript_003919;Transcript_023790;Transcript_030766;Transcript_057704;Transcript_156034;Transcript_168817;Transcript_177955;Transcript_190714;Transcript_223248;Transcript_226188;Transcript_227772;Transcript_230920;Transcript_236391;Transcript_238732
GO:0005769	C:early_endosome	14	2.32589e-08	Transcript_014357;Transcript_028467;Transcript_029010;Transcript_029410;Transcript_033544;Transcript_051617;Transcript_077629;Transcript_080135;Transcript_095467;Transcript_142988;Transcript_156034;Transcript_161256;Transcript_193908;Transcript_222945
GO:0071013	C:catalytic_step_2_spliceosome_	14	3.76855e-10	Transcript_001089;Transcript_014745;Transcript_035258;Transcript_050764;Transcript_069308;Transcript_150591;Transcript_158089;Transcript_189117;Transcript_197498;Transcript_200884;Transcript_213172;Transcript_241198;Transcript_241730;Transcript_244667
GO:0042545	P:cell_wall_modification	14	1.73855e-07	Transcript_015471;Transcript_017401;Transcript_022963;Transcript_029575;Transcript_038709;Transcript_083561;Transcript_083698;Transcript_154751;Transcript_167963;Transcript_199053;Transcript_202387;Transcript_219435;Transcript_236222;Transcript_239463
ko05322	Systemic_lupus_erythematosus	14	0.00182685	Transcript_005006;Transcript_008491;Transcript_015336;Transcript_015927;Transcript_029618;Transcript_039560;Transcript_042834;Transcript_060889;Transcript_156668;Transcript_174680;Transcript_176347;Transcript_191863;Transcript_194853;Transcript_197498
ko04070	Phosphatidylinositol_signaling_system	14	8.51095e-16	Transcript_010331;Transcript_012368;Transcript_022710;Transcript_030019;Transcript_033079;Transcript_041983;Transcript_096467;Transcript_128738;Transcript_149739;Transcript_152989;Transcript_155584;Transcript_160090;Transcript_167046;Transcript_242230
GO:0010228	P:vegetative_to_reproductive_phase_transition_of_meristem	14	6.40372e-13	Transcript_004587;Transcript_007556;Transcript_008592;Transcript_020594;Transcript_027199;Transcript_027421;Transcript_042738;Transcript_061028;Transcript_106245;Transcript_146739;Transcript_158844;Transcript_194996;Transcript_214469;Transcript_220474
ko04972	Pancreatic_secretion	14	1.5065e-10	Transcript_017829;Transcript_018980;Transcript_036792;Transcript_042857;Transcript_093127;Transcript_126565;Transcript_139716;Transcript_141684;Transcript_151747;Transcript_194460;Transcript_195679;Transcript_227992;Transcript_230798;Transcript_243719
GO:0005694	C:chromosome_	14	6.47976e-06	Transcript_001079;Transcript_018911;Transcript_044742;Transcript_057704;Transcript_134298;Transcript_154699;Transcript_177955;Transcript_181525;Transcript_192455;Transcript_209767;Transcript_230389;Transcript_230959;Transcript_232924;Transcript_234965
ko04350	TGF-beta_signaling_pathway	13	1.51199e-06	Transcript_010389;Transcript_015425;Transcript_024392;Transcript_024752;Transcript_027923;Transcript_028007;Transcript_041585;Transcript_042195;Transcript_047623;Transcript_079199;Transcript_105439;Transcript_199440;Transcript_237083
GO:0009073	P:aromatic_amino_acid_family_biosynthetic_process	13	4.05344e-05	Transcript_009838;Transcript_012523;Transcript_017184;Transcript_033624;Transcript_035392;Transcript_035659;Transcript_092531;Transcript_109203;Transcript_114688;Transcript_169609;Transcript_170151;Transcript_196529;Transcript_220535
GO:0019899	F:enzyme_binding	13	0.00389127	Transcript_003919;Transcript_013087;Transcript_018408;Transcript_040271;Transcript_043672;Transcript_086158;Transcript_126578;Transcript_156640;Transcript_189510;Transcript_197498;Transcript_202823;Transcript_231485;Transcript_233614
GO:0042470	C:melanosome	13	0.0120803	Transcript_003919;Transcript_006096;Transcript_008058;Transcript_015001;Transcript_016602;Transcript_023790;Transcript_027002;Transcript_109160;Transcript_130786;Transcript_157849;Transcript_161256;Transcript_192756;Transcript_242079
GO:0030659	C:cytoplasmic_vesicle_membrane_	13	6.98482e-05	Transcript_011643;Transcript_016549;Transcript_016602;Transcript_027002;Transcript_027093;Transcript_031433;Transcript_051617;Transcript_153016;Transcript_153199;Transcript_170834;Transcript_204554;Transcript_217368;Transcript_222015
ko00860	Porphyrin_and_chlorophyll_metabolism	13	3.11338e-10	Transcript_000076;Transcript_007249;Transcript_011583;Transcript_015829;Transcript_027262;Transcript_029246;Transcript_035659;Transcript_042887;Transcript_079957;Transcript_099841;Transcript_116401;Transcript_129896;Transcript_139224
GO:0044281	P:small_molecule_metabolic_process	13	2.08243e-14	Transcript_049193;Transcript_058742;Transcript_064226;Transcript_091674;Transcript_096431;Transcript_186885;Transcript_187317;Transcript_187980;Transcript_188373;Transcript_195589;Transcript_204880;Transcript_214162;Transcript_216692
GO:0006879	P:cellular_iron_ion_homeostasis	13	0.00496479	Transcript_008712;Transcript_017186;Transcript_024398;Transcript_052435;Transcript_093911;Transcript_109276;Transcript_155782;Transcript_167564;Transcript_195589;Transcript_206790;Transcript_233236;Transcript_236080;Transcript_238709
GO:0015238	F:drug_transmembrane_transporter_activity	13	1.51199e-06	Transcript_007607;Transcript_015968;Transcript_017334;Transcript_037763;Transcript_042281;Transcript_043012;Transcript_045823;Transcript_075349;Transcript_173256;Transcript_200633;Transcript_223677;Transcript_225112;Transcript_242346
GO:0022008	P:neurogenesis	13	2.76609e-07	Transcript_018408;Transcript_036517;Transcript_044365;Transcript_099676;Transcript_126578;Transcript_173665;Transcript_188900;Transcript_208722;Transcript_223871;Transcript_224812;Transcript_233011;Transcript_235577;Transcript_238732
GO:0009306	P:protein_secretion	13	6.98482e-05	Transcript_017571;Transcript_017829;Transcript_028954;Transcript_035136;Transcript_083711;Transcript_089339;Transcript_093911;Transcript_108370;Transcript_139496;Transcript_139716;Transcript_157742;Transcript_230798;Transcript_243719
GO:0005839	C:proteasome_core_complex	13	9.17406e-05	Transcript_005328;Transcript_016053;Transcript_020907;Transcript_041803;Transcript_048992;Transcript_160414;Transcript_169399;Transcript_192076;Transcript_193709;Transcript_194001;Transcript_199477;Transcript_211140;Transcript_224153
GO:0048316	P:seed_development	13	2.71462e-08	Transcript_001927;Transcript_007314;Transcript_007763;Transcript_011900;Transcript_014168;Transcript_128888;Transcript_159501;Transcript_173780;Transcript_177103;Transcript_194227;Transcript_196551;Transcript_225109;Transcript_238700
GO:0009853	P:photorespiration	13	4.96477e-07	Transcript_002810;Transcript_020282;Transcript_044397;Transcript_100833;Transcript_174520;Transcript_179003;Transcript_194608;Transcript_196980;Transcript_201953;Transcript_209355;Transcript_222418;Transcript_236702;Transcript_241437
GO:0004713	F:protein_tyrosine_kinase_activity	13	0.00773112	Transcript_006898;Transcript_009059;Transcript_042435;Transcript_043265;Transcript_047410;Transcript_122920;Transcript_162242;Transcript_163028;Transcript_164420;Transcript_173514;Transcript_211621;Transcript_236330;Transcript_241592
GO:0090502	P:RNA_phosphodiester_bond_hydrolysis,_endonucleolytic	13	1.84785e-05	Transcript_023948;Transcript_024473;Transcript_030994;Transcript_031794;Transcript_036090;Transcript_042738;Transcript_102338;Transcript_108141;Transcript_168571;Transcript_178073;Transcript_225142;Transcript_237277;Transcript_244174
GO:0006906	P:vesicle_fusion	13	6.2848e-09	Transcript_012881;Transcript_016956;Transcript_017670;Transcript_037452;Transcript_038952;Transcript_069330;Transcript_077148;Transcript_090487;Transcript_155836;Transcript_175654;Transcript_198876;Transcript_212752;Transcript_224504
GO:0007017	P:microtubule-based_process	13	1.75613e-10	Transcript_006853;Transcript_012650;Transcript_014610;Transcript_033472;Transcript_063860;Transcript_065850;Transcript_070575;Transcript_103380;Transcript_108137;Transcript_197380;Transcript_215001;Transcript_225969;Transcript_228587
GO:0005484	F:SNAP_receptor_activity	13	2.40588e-10	Transcript_012881;Transcript_016956;Transcript_017670;Transcript_037452;Transcript_038952;Transcript_077148;Transcript_090487;Transcript_155836;Transcript_174694;Transcript_191620;Transcript_212752;Transcript_224504;Transcript_244730
GO:0051258	P:protein_polymerization	13	2.71462e-08	Transcript_006853;Transcript_012650;Transcript_014610;Transcript_033472;Transcript_063860;Transcript_103380;Transcript_156621;Transcript_197380;Transcript_215001;Transcript_225969;Transcript_228587;Transcript_229002;Transcript_240107
GO:0045944	P:positive_regulation_of_transcription_from_RNA_polymerase_II_promoter	13	5.31977e-05	Transcript_006542;Transcript_026179;Transcript_029817;Transcript_042164;Transcript_058742;Transcript_087929;Transcript_132402;Transcript_189510;Transcript_203093;Transcript_209767;Transcript_222288;Transcript_225156;Transcript_234015
GO:0032508	P:DNA_duplex_unwinding	13	0.000255834	Transcript_007004;Transcript_007752;Transcript_012245;Transcript_020507;Transcript_023823;Transcript_024850;Transcript_041578;Transcript_042623;Transcript_065669;Transcript_084390;Transcript_132402;Transcript_191805;Transcript_241339
GO:0022900	P:electron_transport_chain	13	0.000699568	Transcript_005630;Transcript_017791;Transcript_019100;Transcript_023779;Transcript_028203;Transcript_032550;Transcript_044747;Transcript_048440;Transcript_050536;Transcript_106807;Transcript_110295;Transcript_186581;Transcript_209949
GO:0005765	C:lysosomal_membrane	13	1.62806e-07	Transcript_000717;Transcript_008058;Transcript_041445;Transcript_151294;Transcript_151618;Transcript_158442;Transcript_187980;Transcript_190714;Transcript_202040;Transcript_220756;Transcript_233045;Transcript_236391;Transcript_238224
GO:0048510	P:regulation_of_timing_of_transition_from_vegetative_to_reproductive_phase	13	0.00146022	Transcript_009473;Transcript_029879;Transcript_044732;Transcript_063879;Transcript_082012;Transcript_149620;Transcript_159501;Transcript_162985;Transcript_169232;Transcript_170102;Transcript_175659;Transcript_207832;Transcript_224271
GO:0000419	C:DNA-directed_RNA_polymerase_V_complex	13	0.00389127	Transcript_004956;Transcript_009107;Transcript_011320;Transcript_021333;Transcript_096996;Transcript_166058;Transcript_170193;Transcript_190420;Transcript_193105;Transcript_209113;Transcript_229714;Transcript_230510;Transcript_241662
GO:0015078	F:hydrogen_ion_transmembrane_transporter_activity	13	8.56142e-07	Transcript_006390;Transcript_009551;Transcript_015653;Transcript_024398;Transcript_027002;Transcript_073956;Transcript_080346;Transcript_148330;Transcript_173000;Transcript_177136;Transcript_211190;Transcript_219153;Transcript_230521
GO:0009845	P:seed_germination	13	1.75613e-10	Transcript_004587;Transcript_013688;Transcript_023455;Transcript_027199;Transcript_030597;Transcript_031010;Transcript_031559;Transcript_034989;Transcript_037922;Transcript_042738;Transcript_212311;Transcript_241205;Transcript_243318
GO:0048573	P:photoperiodism,_flowering	13	3.65012e-08	Transcript_006476;Transcript_007373;Transcript_027953;Transcript_031314;Transcript_041388;Transcript_042074;Transcript_046510;Transcript_082012;Transcript_101040;Transcript_152679;Transcript_167400;Transcript_168855;Transcript_240717
GO:0000932	C:cytoplasmic_mRNA_processing_body	13	2.30081e-12	Transcript_001387;Transcript_018247;Transcript_035131;Transcript_041803;Transcript_043672;Transcript_049530;Transcript_102209;Transcript_153990;Transcript_163680;Transcript_173665;Transcript_211140;Transcript_222288;Transcript_224762
GO:0009523	C:photosystem_II	13	2.02105e-08	Transcript_004378;Transcript_013668;Transcript_021843;Transcript_022042;Transcript_022303;Transcript_025627;Transcript_042701;Transcript_044209;Transcript_065295;Transcript_106769;Transcript_174493;Transcript_195375;Transcript_236454
GO:0006396	P:RNA_processing	13	4.64645e-09	Transcript_012222;Transcript_027868;Transcript_050764;Transcript_112168;Transcript_113060;Transcript_124944;Transcript_134784;Transcript_144914;Transcript_165031;Transcript_196766;Transcript_198996;Transcript_209767;Transcript_231075
GO:0004857	F:enzyme_inhibitor_activity	13	2.06754e-07	Transcript_015471;Transcript_017401;Transcript_031230;Transcript_038709;Transcript_066009;Transcript_083561;Transcript_083698;Transcript_159817;Transcript_167963;Transcript_199053;Transcript_202387;Transcript_236222;Transcript_239463
GO:0009640	P:photomorphogenesis	13	1.13724e-06	Transcript_004587;Transcript_006151;Transcript_007556;Transcript_027199;Transcript_033998;Transcript_037258;Transcript_042738;Transcript_164508;Transcript_225665;Transcript_227716;Transcript_228726;Transcript_236713;Transcript_243025
GO:0045330	F:aspartyl_esterase_activity	13	2.76609e-07	Transcript_015471;Transcript_017401;Transcript_022963;Transcript_029575;Transcript_038709;Transcript_083561;Transcript_083698;Transcript_154751;Transcript_167963;Transcript_199053;Transcript_202387;Transcript_236222;Transcript_239463
ko00330	Arginine_and_proline_metabolism	13	1.89113e-13	Transcript_003307;Transcript_027419;Transcript_049636;Transcript_059679;Transcript_064226;Transcript_110200;Transcript_145284;Transcript_149620;Transcript_165238;Transcript_173352;Transcript_206114;Transcript_212121;Transcript_231291
GO:0005925	C:focal_adhesion	13	0.00116458	Transcript_003919;Transcript_015001;Transcript_018213;Transcript_023790;Transcript_032576;Transcript_051617;Transcript_089022;Transcript_110572;Transcript_132621;Transcript_138047;Transcript_227594;Transcript_234015;Transcript_239789
ko00053	Ascorbate_and_aldarate_metabolism	13	5.4501e-14	Transcript_023351;Transcript_030980;Transcript_031050;Transcript_101286;Transcript_115742;Transcript_133451;Transcript_160090;Transcript_161697;Transcript_206114;Transcript_210608;Transcript_212121;Transcript_227392;Transcript_234086
ko04978	Mineral_absorption	13	0.00015095	Transcript_027524;Transcript_036142;Transcript_040354;Transcript_052435;Transcript_071804;Transcript_139224;Transcript_143133;Transcript_154412;Transcript_161060;Transcript_175091;Transcript_199001;Transcript_214132;Transcript_236080
GO:0003690	F:double-stranded_DNA_binding	12	0.0105399	Transcript_009033;Transcript_012406;Transcript_013610;Transcript_018681;Transcript_030874;Transcript_041464;Transcript_041509;Transcript_156971;Transcript_170251;Transcript_226697;Transcript_227135;Transcript_233134
GO:0006857	P:oligopeptide_transport	12	0.0130036	Transcript_003585;Transcript_012470;Transcript_016906;Transcript_017673;Transcript_040125;Transcript_042788;Transcript_098873;Transcript_108812;Transcript_169398;Transcript_183580;Transcript_190560;Transcript_193595
GO:0010499	P:proteasomal_ubiquitin-independent_protein_catabolic_process	12	0.000151489	Transcript_002519;Transcript_005328;Transcript_012328;Transcript_016053;Transcript_020907;Transcript_041803;Transcript_048992;Transcript_160414;Transcript_193709;Transcript_199477;Transcript_211140;Transcript_224153
GO:0051607	P:defense_response_to_virus	12	2.28714e-05	Transcript_004120;Transcript_016072;Transcript_026715;Transcript_102338;Transcript_111457;Transcript_138452;Transcript_151175;Transcript_178073;Transcript_194222;Transcript_202422;Transcript_211890;Transcript_222197
GO:0015299	F:solute:proton_antiporter_activity	12	7.18912e-09	Transcript_007607;Transcript_008620;Transcript_037763;Transcript_042281;Transcript_045823;Transcript_052207;Transcript_172485;Transcript_173256;Transcript_182590;Transcript_223677;Transcript_225112;Transcript_242346
GO:0000209	P:protein_polyubiquitination	12	4.18809e-11	Transcript_008592;Transcript_020594;Transcript_023823;Transcript_031840;Transcript_044220;Transcript_186885;Transcript_198115;Transcript_203093;Transcript_231411;Transcript_233080;Transcript_238539;Transcript_243787
GO:0034976	P:response_to_endoplasmic_reticulum_stress	12	0.000936697	Transcript_003919;Transcript_006757;Transcript_009857;Transcript_025914;Transcript_032576;Transcript_062148;Transcript_150412;Transcript_151583;Transcript_171029;Transcript_172156;Transcript_199256;Transcript_242801
GO:0019253	P:reductive_pentose-phosphate_cycle	12	0.000260463	Transcript_017984;Transcript_025512;Transcript_029726;Transcript_043541;Transcript_047069;Transcript_049290;Transcript_128232;Transcript_142152;Transcript_143507;Transcript_155850;Transcript_234220;Transcript_241437
GO:0005758	C:mitochondrial_intermembrane_space	12	1.77881e-08	Transcript_015263;Transcript_016081;Transcript_020209;Transcript_043170;Transcript_102363;Transcript_102388;Transcript_158464;Transcript_190023;Transcript_192121;Transcript_196736;Transcript_213068;Transcript_236609
GO:0000413	P:protein_peptidyl-prolyl_isomerization	12	7.72246e-08	Transcript_000349;Transcript_005547;Transcript_015001;Transcript_034963;Transcript_057334;Transcript_060667;Transcript_060767;Transcript_158089;Transcript_168472;Transcript_196613;Transcript_210758;Transcript_212264
ko03440	Homologous_recombination	12	5.7663e-06	Transcript_019818;Transcript_025477;Transcript_030179;Transcript_043968;Transcript_155998;Transcript_186407;Transcript_191489;Transcript_192198;Transcript_204204;Transcript_226697;Transcript_230389;Transcript_241339
GO:0009522	C:photosystem_I	12	3.27103e-08	Transcript_002052;Transcript_004200;Transcript_004378;Transcript_013668;Transcript_014016;Transcript_021843;Transcript_022042;Transcript_022303;Transcript_042701;Transcript_043135;Transcript_065295;Transcript_106769
GO:0005665	C:DNA-directed_RNA_polymerase_II,_core_complex_	12	5.28106e-05	Transcript_009107;Transcript_021333;Transcript_031916;Transcript_079006;Transcript_096996;Transcript_173062;Transcript_190451;Transcript_193105;Transcript_209113;Transcript_219696;Transcript_229714;Transcript_241662
GO:0004601	F:peroxidase_activity	12	2.25252e-15	Transcript_000049;Transcript_007947;Transcript_016492;Transcript_017498;Transcript_041171;Transcript_050011;Transcript_092858;Transcript_149610;Transcript_156468;Transcript_169359;Transcript_188345;Transcript_234367
GO:0016740	F:transferase_activity	12	2.18668e-09	Transcript_004765;Transcript_017173;Transcript_062960;Transcript_089717;Transcript_089849;Transcript_150852;Transcript_160559;Transcript_199686;Transcript_216965;Transcript_234662;Transcript_242855;Transcript_243071
GO:0018279	P:protein_N-linked_glycosylation_via_asparagine	12	0.0487479	Transcript_015282;Transcript_016705;Transcript_026511;Transcript_031964;Transcript_034685;Transcript_065665;Transcript_149321;Transcript_170169;Transcript_187317;Transcript_192756;Transcript_219435;Transcript_234247
GO:0010150	P:leaf_senescence	12	3.39604e-19	Transcript_001478;Transcript_043491;Transcript_046373;Transcript_055024;Transcript_083601;Transcript_099034;Transcript_186273;Transcript_194222;Transcript_198258;Transcript_203408;Transcript_214925;Transcript_225142
GO:0010501	P:RNA_secondary_structure_unwinding	12	4.42142e-07	Transcript_018681;Transcript_022302;Transcript_043594;Transcript_064028;Transcript_087162;Transcript_091642;Transcript_114295;Transcript_150296;Transcript_156971;Transcript_197376;Transcript_232073;Transcript_235815
ko04392	Hippo_signaling_pathway_-multiple_species	12	0.0105399	Transcript_025702;Transcript_035369;Transcript_041385;Transcript_042270;Transcript_048879;Transcript_162179;Transcript_172468;Transcript_188882;Transcript_193346;Transcript_203386;Transcript_227925;Transcript_228491
GO:0042128	P:nitrate_assimilation	12	3.25964e-06	Transcript_012470;Transcript_016906;Transcript_018713;Transcript_029230;Transcript_030787;Transcript_042788;Transcript_075322;Transcript_164586;Transcript_169496;Transcript_193595;Transcript_199078;Transcript_216217
ko05145	Toxoplasmosis	12	2.21496e-11	Transcript_014712;Transcript_021004;Transcript_040010;Transcript_041980;Transcript_043290;Transcript_047623;Transcript_071807;Transcript_156614;Transcript_164268;Transcript_169979;Transcript_173863;Transcript_199440
GO:0015288	F:porin_activity	12	0.000260463	Transcript_008525;Transcript_019608;Transcript_034168;Transcript_061583;Transcript_066093;Transcript_095344;Transcript_154795;Transcript_157270;Transcript_200823;Transcript_203430;Transcript_215454;Transcript_224735
ko04150	mTOR_signaling_pathway	12	2.41097e-08	Transcript_011423;Transcript_021276;Transcript_043672;Transcript_047623;Transcript_058816;Transcript_156614;Transcript_173665;Transcript_199440;Transcript_216217;Transcript_221971;Transcript_228274;Transcript_242230
ko00250	Alanine,_aspartate_and_glutamate_metabolism	12	1.82378e-12	Transcript_010249;Transcript_011835;Transcript_015640;Transcript_034685;Transcript_049636;Transcript_051707;Transcript_076001;Transcript_153764;Transcript_155852;Transcript_162305;Transcript_197658;Transcript_233238
GO:0006284	P:base-excision_repair	12	3.02146e-05	Transcript_012317;Transcript_027829;Transcript_039757;Transcript_082537;Transcript_093232;Transcript_111551;Transcript_144874;Transcript_149537;Transcript_156756;Transcript_168654;Transcript_225942;Transcript_242029
ko04728	Dopaminergic_synapse	12	1.31375e-08	Transcript_007119;Transcript_008779;Transcript_015425;Transcript_023681;Transcript_043524;Transcript_043723;Transcript_047441;Transcript_079199;Transcript_095402;Transcript_154666;Transcript_230920;Transcript_231986
GO:0031408	P:oxylipin_biosynthetic_process	12	7.18912e-09	Transcript_011917;Transcript_015276;Transcript_028090;Transcript_035505;Transcript_045642;Transcript_065706;Transcript_069743;Transcript_088168;Transcript_092679;Transcript_110218;Transcript_160618;Transcript_201578
GO:0006914	P:autophagy	12	4.64864e-07	Transcript_023362;Transcript_029777;Transcript_035021;Transcript_083601;Transcript_151294;Transcript_156034;Transcript_158394;Transcript_178296;Transcript_185260;Transcript_222813;Transcript_233045;Transcript_242031
GO:0004725	F:protein_tyrosine_phosphatase_activity	12	3.99368e-05	Transcript_009742;Transcript_049152;Transcript_101941;Transcript_150580;Transcript_196766;Transcript_200917;Transcript_211939;Transcript_223537;Transcript_227209;Transcript_228277;Transcript_232754;Transcript_242230
GO:0006631	P:fatty_acid_metabolic_process	12	5.76842e-11	Transcript_009246;Transcript_017687;Transcript_023455;Transcript_028424;Transcript_042339;Transcript_050673;Transcript_158730;Transcript_169987;Transcript_192500;Transcript_232327;Transcript_236739;Transcript_241205
ko00513	Various_types_of_N-glycan_biosynthesis	12	1.18211e-09	Transcript_004469;Transcript_004775;Transcript_015282;Transcript_026511;Transcript_065665;Transcript_149321;Transcript_157849;Transcript_171029;Transcript_192756;Transcript_193176;Transcript_219435;Transcript_229590
GO:0004003	F:ATP-dependent_DNA_helicase_activity	12	0.00829641	Transcript_013610;Transcript_020507;Transcript_024850;Transcript_030874;Transcript_041509;Transcript_041578;Transcript_042623;Transcript_067779;Transcript_084390;Transcript_132402;Transcript_191805;Transcript_233134
ko00410	beta-Alanine_metabolism	12	2.80857e-13	Transcript_064226;Transcript_072738;Transcript_149620;Transcript_155852;Transcript_161507;Transcript_162305;Transcript_197658;Transcript_201523;Transcript_206114;Transcript_212121;Transcript_214388;Transcript_228339
GO:0006541	P:glutamine_metabolic_process	12	5.74484e-08	Transcript_006397;Transcript_011835;Transcript_012317;Transcript_024377;Transcript_027516;Transcript_034685;Transcript_109588;Transcript_129165;Transcript_153768;Transcript_188257;Transcript_193487;Transcript_237938
GO:0000049	F:tRNA_binding	12	7.72246e-08	Transcript_004587;Transcript_009244;Transcript_013980;Transcript_014238;Transcript_025631;Transcript_027199;Transcript_039594;Transcript_042834;Transcript_084126;Transcript_090809;Transcript_156668;Transcript_241438
ko04720	Long-term_potentiation	12	4.64864e-07	Transcript_023681;Transcript_024392;Transcript_042195;Transcript_043524;Transcript_047441;Transcript_047623;Transcript_154666;Transcript_199440;Transcript_227948;Transcript_230920;Transcript_231986;Transcript_237083
ko00511	Other_glycan_degradation	12	0.0744695	Transcript_008082;Transcript_014047;Transcript_021879;Transcript_033617;Transcript_041445;Transcript_042164;Transcript_109625;Transcript_130095;Transcript_175406;Transcript_184727;Transcript_186964;Transcript_208239
GO:0000122	P:negative_regulation_of_transcription_from_RNA_polymerase_II_promoter	12	7.91242e-07	Transcript_026330;Transcript_036517;Transcript_058742;Transcript_087929;Transcript_091403;Transcript_149849;Transcript_182033;Transcript_186885;Transcript_229005;Transcript_232924;Transcript_233011;Transcript_235910
GO:0033290	C:eukaryotic_48S_preinitiation_complex	12	4.42142e-07	Transcript_007023;Transcript_031321;Transcript_031853;Transcript_041704;Transcript_158371;Transcript_159811;Transcript_181439;Transcript_196649;Transcript_197517;Transcript_205655;Transcript_211481;Transcript_238208
ko00640	Propanoate_metabolism	12	7.95343e-11	Transcript_028726;Transcript_045618;Transcript_068373;Transcript_072738;Transcript_080382;Transcript_090548;Transcript_149735;Transcript_151724;Transcript_214388;Transcript_227327;Transcript_228339;Transcript_233389
ko00100	Steroid_biosynthesis	12	0.000341556	Transcript_001655;Transcript_024414;Transcript_026535;Transcript_052099;Transcript_102735;Transcript_155438;Transcript_165687;Transcript_193446;Transcript_204200;Transcript_226282;Transcript_241637;Transcript_242410
GO:0008094	F:DNA-dependent_ATPase_activity	11	0.00120946	Transcript_023823;Transcript_025477;Transcript_115044;Transcript_131580;Transcript_139660;Transcript_189510;Transcript_191489;Transcript_192198;Transcript_204204;Transcript_215297;Transcript_226697
GO:0009739	P:response_to_gibberellin	11	4.5025e-09	Transcript_004579;Transcript_020440;Transcript_027562;Transcript_043650;Transcript_099762;Transcript_100071;Transcript_101040;Transcript_111801;Transcript_170551;Transcript_185779;Transcript_231436
GO:0046933	F:proton-transporting_ATP_synthase_activity,_rotational_mechanism	11	1.33039e-06	Transcript_003976;Transcript_019100;Transcript_042379;Transcript_102208;Transcript_105369;Transcript_140692;Transcript_150169;Transcript_165487;Transcript_181242;Transcript_215376;Transcript_225649
GO:0034599	P:cellular_response_to_oxidative_stress	11	1.65755e-05	Transcript_002037;Transcript_009468;Transcript_009742;Transcript_034152;Transcript_037644;Transcript_039350;Transcript_090184;Transcript_185260;Transcript_201523;Transcript_201768;Transcript_211939
GO:0010218	P:response_to_far_red_light	11	2.19854e-10	Transcript_022042;Transcript_031196;Transcript_032257;Transcript_033045;Transcript_042701;Transcript_043997;Transcript_044209;Transcript_065295;Transcript_225665;Transcript_228200;Transcript_236713
GO:0050821	P:protein_stabilization	11	0.0110276	Transcript_009846;Transcript_015001;Transcript_037116;Transcript_042194;Transcript_049899;Transcript_099676;Transcript_109674;Transcript_144287;Transcript_185260;Transcript_212278;Transcript_232493
GO:0023014	P:signal_transduction_by_protein_phosphorylation	11	0.00329645	Transcript_004252;Transcript_014297;Transcript_086608;Transcript_161029;Transcript_165632;Transcript_168093;Transcript_192512;Transcript_202823;Transcript_211380;Transcript_236927;Transcript_238155
GO:0009514	C:glyoxysome	11	0.00203127	Transcript_010583;Transcript_033792;Transcript_047567;Transcript_077772;Transcript_115742;Transcript_133451;Transcript_149630;Transcript_172193;Transcript_187487;Transcript_210608;Transcript_222906
GO:0006730	P:one-carbon_metabolic_process	11	1.26667e-06	Transcript_028080;Transcript_030648;Transcript_040305;Transcript_070533;Transcript_089051;Transcript_112757;Transcript_137937;Transcript_187024;Transcript_193052;Transcript_202210;Transcript_216654
GO:0008757	F:S-adenosylmethionine-dependent_methyltransferase_activity	11	0.00542099	Transcript_002320;Transcript_027094;Transcript_033752;Transcript_035516;Transcript_059896;Transcript_064788;Transcript_087173;Transcript_162126;Transcript_178447;Transcript_218764;Transcript_242086
ko05162	Measles	11	2.93925e-05	Transcript_004120;Transcript_040010;Transcript_041704;Transcript_053673;Transcript_071807;Transcript_158397;Transcript_164268;Transcript_186094;Transcript_188612;Transcript_188900;Transcript_205655
GO:0016126	P:sterol_biosynthetic_process	11	3.71654e-08	Transcript_001655;Transcript_007425;Transcript_024414;Transcript_026535;Transcript_037922;Transcript_045908;Transcript_052099;Transcript_165687;Transcript_204200;Transcript_241637;Transcript_242410
GO:0016036	P:cellular_response_to_phosphate_starvation	11	1.70794e-11	Transcript_018828;Transcript_048279;Transcript_062267;Transcript_108075;Transcript_135343;Transcript_163943;Transcript_191549;Transcript_202823;Transcript_232193;Transcript_237938;Transcript_243566
ko04611	Platelet_activation	11	0.00263093	Transcript_023681;Transcript_043524;Transcript_047441;Transcript_047623;Transcript_088161;Transcript_154666;Transcript_169578;Transcript_199440;Transcript_230920;Transcript_231986;Transcript_238732
GO:0031977	C:thylakoid_lumen	11	7.27884e-07	Transcript_025627;Transcript_028942;Transcript_034963;Transcript_036840;Transcript_044209;Transcript_051630;Transcript_060667;Transcript_162684;Transcript_168386;Transcript_224719;Transcript_229839
GO:0016788	F:hydrolase_activity,_acting_on_ester_bonds	11	1.17644e-15	Transcript_023203;Transcript_024269;Transcript_032056;Transcript_042858;Transcript_143270;Transcript_161330;Transcript_173786;Transcript_177103;Transcript_201588;Transcript_235984;Transcript_238404
GO:0042546	P:cell_wall_biogenesis	11	9.83715e-07	Transcript_011873;Transcript_042823;Transcript_055435;Transcript_055465;Transcript_144075;Transcript_161824;Transcript_183501;Transcript_190139;Transcript_227713;Transcript_234086;Transcript_234575
GO:0004693	F:cyclin-dependent_protein_serine/threonine_kinase_activity	11	3.91665e-05	Transcript_009578;Transcript_012151;Transcript_015339;Transcript_021520;Transcript_168817;Transcript_179708;Transcript_189554;Transcript_215354;Transcript_226188;Transcript_230973;Transcript_244820
GO:0030234	F:enzyme_regulator_activity	11	0.0431535	Transcript_001387;Transcript_016835;Transcript_018911;Transcript_026804;Transcript_061441;Transcript_129307;Transcript_163680;Transcript_189492;Transcript_223135;Transcript_224261;Transcript_229924
ko05161	Hepatitis_B	11	4.5025e-09	Transcript_002009;Transcript_019957;Transcript_024392;Transcript_042195;Transcript_047623;Transcript_190505;Transcript_197376;Transcript_199440;Transcript_203093;Transcript_237083;Transcript_242230
GO:0019901	F:protein_kinase_binding	11	2.26909e-06	Transcript_013097;Transcript_015406;Transcript_019423;Transcript_024167;Transcript_057704;Transcript_156640;Transcript_158163;Transcript_171409;Transcript_177955;Transcript_202823;Transcript_227772
GO:0015935	C:small_ribosomal_subunit	11	1.26667e-06	Transcript_012444;Transcript_017135;Transcript_039345;Transcript_065610;Transcript_069100;Transcript_121302;Transcript_139020;Transcript_193010;Transcript_211408;Transcript_228502;Transcript_236663
ko04130	SNARE_interactions_in_vesicular_transport	11	6.82344e-12	Transcript_016956;Transcript_017670;Transcript_037452;Transcript_038952;Transcript_069330;Transcript_090487;Transcript_175654;Transcript_181725;Transcript_198876;Transcript_212752;Transcript_224504
GO:0015171	F:amino_acid_transmembrane_transporter_activity	11	0.0223676	Transcript_009106;Transcript_014614;Transcript_022464;Transcript_026099;Transcript_027093;Transcript_030947;Transcript_036388;Transcript_050253;Transcript_154795;Transcript_161107;Transcript_161599
GO:0031901	C:early_endosome_membrane	11	0.00422835	Transcript_014357;Transcript_017571;Transcript_028467;Transcript_031378;Transcript_033544;Transcript_035136;Transcript_077629;Transcript_151618;Transcript_161256;Transcript_179732;Transcript_227772
ko03410	Base_excision_repair	11	7.3487e-06	Transcript_019818;Transcript_027829;Transcript_029929;Transcript_039757;Transcript_043968;Transcript_082537;Transcript_111551;Transcript_156756;Transcript_186407;Transcript_186513;Transcript_222659
GO:0001731	P:formation_of_translation_preinitiation_complex	11	9.28574e-08	Transcript_007023;Transcript_031321;Transcript_031853;Transcript_127738;Transcript_158371;Transcript_159811;Transcript_181439;Transcript_196649;Transcript_197517;Transcript_211481;Transcript_238208
GO:0009741	P:response_to_brassinosteroid	11	0.00888876	Transcript_001725;Transcript_015976;Transcript_016952;Transcript_017135;Transcript_029514;Transcript_059679;Transcript_100071;Transcript_171674;Transcript_197324;Transcript_216653;Transcript_218401
ko00720	Carbon_fixation_pathways_in_prokaryotes	11	1.26234e-07	Transcript_005683;Transcript_017186;Transcript_028726;Transcript_059044;Transcript_080382;Transcript_090548;Transcript_151724;Transcript_185040;Transcript_187708;Transcript_231794;Transcript_233389
GO:0008285	P:negative_regulation_of_cell_proliferation	11	0.00120946	Transcript_004120;Transcript_004752;Transcript_043946;Transcript_044265;Transcript_053224;Transcript_088645;Transcript_109733;Transcript_121303;Transcript_191790;Transcript_222288;Transcript_242230
GO:0006338	P:chromatin_remodeling	11	2.13848e-08	Transcript_001079;Transcript_020316;Transcript_025469;Transcript_029854;Transcript_029929;Transcript_038151;Transcript_102700;Transcript_132402;Transcript_140451;Transcript_154232;Transcript_214684
GO:0009423	P:chorismate_biosynthetic_process	11	0.000740401	Transcript_009838;Transcript_012523;Transcript_017184;Transcript_033624;Transcript_035392;Transcript_092531;Transcript_109203;Transcript_114688;Transcript_169609;Transcript_170151;Transcript_220535
GO:0009664	P:plant-type_cell_wall_organization	11	1.24584e-05	Transcript_012209;Transcript_017797;Transcript_021866;Transcript_065665;Transcript_184628;Transcript_190801;Transcript_208347;Transcript_217772;Transcript_219435;Transcript_223794;Transcript_224197
GO:0008601	F:protein_phosphatase_type_2A_regulator_activity	11	0.000330197	Transcript_004120;Transcript_005547;Transcript_007119;Transcript_008779;Transcript_043723;Transcript_043946;Transcript_079199;Transcript_095402;Transcript_214387;Transcript_225739;Transcript_241737
ko04724	Glutamatergic_synapse	11	2.20017e-07	Transcript_004067;Transcript_023455;Transcript_031577;Transcript_038170;Transcript_047623;Transcript_051707;Transcript_129190;Transcript_199440;Transcript_227948;Transcript_229716;Transcript_241205
GO:0004871	F:signal_transducer_activity	11	2.43181e-09	Transcript_003163;Transcript_013600;Transcript_028054;Transcript_042499;Transcript_044365;Transcript_095601;Transcript_099346;Transcript_128738;Transcript_172245;Transcript_207457;Transcript_243318
GO:0004364	F:glutathione_transferase_activity	11	9.83715e-07	Transcript_004917;Transcript_006794;Transcript_027150;Transcript_033768;Transcript_046156;Transcript_048483;Transcript_175483;Transcript_175977;Transcript_188426;Transcript_192715;Transcript_228302
GO:0035251	F:UDP-glucosyltransferase_activity	11	7.3487e-06	Transcript_008082;Transcript_011058;Transcript_029215;Transcript_034403;Transcript_062566;Transcript_195757;Transcript_198944;Transcript_207369;Transcript_219528;Transcript_229995;Transcript_235596
GO:0009809	P:lignin_biosynthetic_process	11	4.5025e-09	Transcript_026071;Transcript_045277;Transcript_045385;Transcript_074778;Transcript_147952;Transcript_187034;Transcript_195900;Transcript_202168;Transcript_208346;Transcript_228391;Transcript_237281
ko00592	alpha-Linolenic_acid_metabolism	11	3.9947e-07	Transcript_028090;Transcript_045642;Transcript_065706;Transcript_069743;Transcript_095194;Transcript_099505;Transcript_102735;Transcript_160618;Transcript_162032;Transcript_186076;Transcript_226282
ko05132	Salmonella_infection	11	1.14335e-08	Transcript_000872;Transcript_042857;Transcript_047623;Transcript_053402;Transcript_088161;Transcript_109160;Transcript_129988;Transcript_141684;Transcript_194999;Transcript_199440;Transcript_234723
GO:0007052	P:mitotic_spindle_organization	11	3.71654e-08	Transcript_014770;Transcript_034795;Transcript_036865;Transcript_041704;Transcript_108190;Transcript_150565;Transcript_173665;Transcript_200794;Transcript_205655;Transcript_213172;Transcript_229436
GO:0048038	F:quinone_binding	11	1.63519e-07	Transcript_016808;Transcript_017701;Transcript_047147;Transcript_062246;Transcript_063870;Transcript_096996;Transcript_161507;Transcript_171030;Transcript_200897;Transcript_222465;Transcript_239858
ko04115	p53_signaling_pathway	11	9.28574e-08	Transcript_003797;Transcript_018651;Transcript_042322;Transcript_047860;Transcript_053673;Transcript_158397;Transcript_181250;Transcript_186094;Transcript_188612;Transcript_204779;Transcript_242230
GO:0051567	P:histone_H3-K9_methylation	11	0.122419	Transcript_016154;Transcript_030874;Transcript_149881;Transcript_153520;Transcript_164613;Transcript_179685;Transcript_184279;Transcript_186407;Transcript_213248;Transcript_222659;Transcript_229005
GO:0003725	F:double-stranded_RNA_binding	11	0.0276016	Transcript_004120;Transcript_018681;Transcript_043594;Transcript_052769;Transcript_054883;Transcript_156971;Transcript_170416;Transcript_187640;Transcript_209767;Transcript_216817;Transcript_237376
GO:0015079	F:potassium_ion_transmembrane_transporter_activity	11	0.00422835	Transcript_004334;Transcript_016549;Transcript_018527;Transcript_029329;Transcript_032095;Transcript_032931;Transcript_087345;Transcript_148335;Transcript_181291;Transcript_205272;Transcript_236023
ko00310	Lysine_degradation	11	4.21436e-14	Transcript_007527;Transcript_013218;Transcript_031909;Transcript_043833;Transcript_072536;Transcript_151724;Transcript_153520;Transcript_160061;Transcript_206114;Transcript_212121;Transcript_222193
GO:0003774	F:motor_activity	11	9.3703e-06	Transcript_032662;Transcript_037311;Transcript_043011;Transcript_065850;Transcript_088341;Transcript_108137;Transcript_122611;Transcript_153903;Transcript_161890;Transcript_188014;Transcript_234993
GO:0061077	P:chaperone-mediated_protein_folding	11	0.00329645	Transcript_015001;Transcript_024445;Transcript_028741;Transcript_057334;Transcript_060767;Transcript_149152;Transcript_158589;Transcript_168472;Transcript_188321;Transcript_210758;Transcript_212264
GO:0005819	C:spindle	11	8.43534e-16	Transcript_024752;Transcript_027923;Transcript_042567;Transcript_064290;Transcript_143107;Transcript_160093;Transcript_169395;Transcript_195799;Transcript_224124;Transcript_232924;Transcript_235339
GO:0046982	F:protein_heterodimerization_activity	11	1.33039e-06	Transcript_006393;Transcript_022821;Transcript_031951;Transcript_039649;Transcript_042164;Transcript_043347;Transcript_087929;Transcript_108289;Transcript_189510;Transcript_200447;Transcript_224354
ko04010	MAPK_signaling_pathway	11	5.29548e-10	Transcript_019423;Transcript_040010;Transcript_042857;Transcript_047623;Transcript_071807;Transcript_141684;Transcript_164268;Transcript_199440;Transcript_203093;Transcript_227948;Transcript_236927
GO:0005198	F:structural_molecule_activity	11	2.8172e-13	Transcript_014860;Transcript_033836;Transcript_033978;Transcript_057999;Transcript_094309;Transcript_141042;Transcript_151075;Transcript_155782;Transcript_180639;Transcript_185769;Transcript_243486
GO:0043687	P:post-translational_protein_modification	11	0.00043218	Transcript_015282;Transcript_026511;Transcript_034685;Transcript_036735;Transcript_042738;Transcript_170169;Transcript_187317;Transcript_192756;Transcript_222659;Transcript_234247;Transcript_235503
ko00340	Histidine_metabolism	11	1.63519e-07	Transcript_006397;Transcript_027516;Transcript_041186;Transcript_130140;Transcript_150387;Transcript_169361;Transcript_198040;Transcript_201523;Transcript_206114;Transcript_212121;Transcript_231508
GO:0030433	P:ER-associated_ubiquitin-dependent_protein_catabolic_process	11	8.37202e-09	Transcript_016705;Transcript_016803;Transcript_023790;Transcript_031964;Transcript_035414;Transcript_043014;Transcript_044265;Transcript_153990;Transcript_174497;Transcript_190807;Transcript_208673
GO:0006636	P:unsaturated_fatty_acid_biosynthetic_process	11	1.65755e-05	Transcript_006968;Transcript_010061;Transcript_040871;Transcript_043427;Transcript_046635;Transcript_049793;Transcript_050781;Transcript_065706;Transcript_124889;Transcript_152573;Transcript_228819
GO:0030968	P:endoplasmic_reticulum_unfolded_protein_response	11	0.0431535	Transcript_004120;Transcript_013980;Transcript_018389;Transcript_024473;Transcript_031964;Transcript_034685;Transcript_035414;Transcript_190807;Transcript_193534;Transcript_196849;Transcript_244174
ko00195	Photosynthesis	11	9.83715e-07	Transcript_001711;Transcript_002052;Transcript_014016;Transcript_016676;Transcript_020208;Transcript_036840;Transcript_048440;Transcript_106807;Transcript_162684;Transcript_174493;Transcript_230506
GO:0042302	F:structural_constituent_of_cuticle	11	3.7751e-05	Transcript_020207;Transcript_025011;Transcript_045030;Transcript_090528;Transcript_096153;Transcript_131440;Transcript_159538;Transcript_165127;Transcript_168118;Transcript_223132;Transcript_236228
GO:0008236	F:serine-type_peptidase_activity	11	2.02862e-08	Transcript_000240;Transcript_007287;Transcript_010715;Transcript_012055;Transcript_016761;Transcript_055917;Transcript_105842;Transcript_158303;Transcript_172193;Transcript_182795;Transcript_201276
GO:0055072	P:iron_ion_homeostasis	11	0.034542	Transcript_000187;Transcript_001223;Transcript_029010;Transcript_041715;Transcript_052435;Transcript_077393;Transcript_078057;Transcript_088056;Transcript_128888;Transcript_187944;Transcript_196551
ko03030	DNA_replication	11	5.29548e-10	Transcript_019818;Transcript_027829;Transcript_030179;Transcript_043968;Transcript_065669;Transcript_072481;Transcript_096227;Transcript_186407;Transcript_224812;Transcript_227703;Transcript_234110
GO:0009707	C:chloroplast_outer_membrane_	11	3.9947e-07	Transcript_026130;Transcript_026510;Transcript_033898;Transcript_036847;Transcript_041446;Transcript_057837;Transcript_165837;Transcript_167378;Transcript_175532;Transcript_193811;Transcript_195362
GO:0009553	P:embryo_sac_development	11	6.83664e-08	Transcript_006686;Transcript_008627;Transcript_018389;Transcript_062148;Transcript_174497;Transcript_183966;Transcript_192512;Transcript_193534;Transcript_197054;Transcript_222241;Transcript_228251
GO:0050897	F:cobalt_ion_binding	10	0.000189353	Transcript_010828;Transcript_018029;Transcript_023779;Transcript_027419;Transcript_043024;Transcript_121125;Transcript_165898;Transcript_186303;Transcript_208325;Transcript_227327
GO:0042277	F:peptide_binding	10	8.75151e-06	Transcript_000349;Transcript_015001;Transcript_018237;Transcript_034963;Transcript_054365;Transcript_072848;Transcript_081299;Transcript_195715;Transcript_196613;Transcript_225156
GO:0000278	P:mitotic_cell_cycle	10	6.2795e-07	Transcript_033998;Transcript_042738;Transcript_057704;Transcript_096227;Transcript_168705;Transcript_177955;Transcript_184046;Transcript_186885;Transcript_189510;Transcript_227772
GO:0004709	F:MAP_kinase_kinase_kinase_activity	10	0.00737489	Transcript_019423;Transcript_030486;Transcript_041598;Transcript_069251;Transcript_151330;Transcript_155512;Transcript_170156;Transcript_203093;Transcript_222945;Transcript_236927
GO:0016282	C:eukaryotic_43S_preinitiation_complex_	10	5.72499e-08	Transcript_007023;Transcript_031321;Transcript_031853;Transcript_158371;Transcript_159811;Transcript_181439;Transcript_196649;Transcript_197517;Transcript_211481;Transcript_238208
GO:0006662	P:glycerol_ether_metabolic_process	10	7.75669e-08	Transcript_002037;Transcript_015094;Transcript_025384;Transcript_034152;Transcript_035277;Transcript_037644;Transcript_039350;Transcript_043270;Transcript_124957;Transcript_201768
GO:0005545	F:1-phosphatidylinositol_binding	10	0.0299444	Transcript_003176;Transcript_007188;Transcript_014631;Transcript_016371;Transcript_045744;Transcript_098689;Transcript_167014;Transcript_175485;Transcript_178285;Transcript_238068
ko04722	Neurotrophin_signaling_pathway	10	3.01413e-15	Transcript_016618;Transcript_027594;Transcript_042857;Transcript_047623;Transcript_141684;Transcript_145801;Transcript_156614;Transcript_199440;Transcript_203093;Transcript_204486
GO:0006334	P:nucleosome_assembly	10	4.4052e-08	Transcript_014142;Transcript_021918;Transcript_043915;Transcript_099411;Transcript_130786;Transcript_154681;Transcript_185779;Transcript_194853;Transcript_229005;Transcript_239848
GO:0010584	P:pollen_exine_formation	10	3.81801e-06	Transcript_009961;Transcript_011900;Transcript_031433;Transcript_040020;Transcript_041425;Transcript_194227;Transcript_197038;Transcript_199478;Transcript_232167;Transcript_237818
GO:0042147	P:retrograde_transport,_endosome_to_Golgi	10	2.70321e-05	Transcript_024907;Transcript_031234;Transcript_031641;Transcript_034022;Transcript_045216;Transcript_090283;Transcript_109160;Transcript_174694;Transcript_234779;Transcript_244730
GO:0009992	P:cellular_water_homeostasis	10	0.000573905	Transcript_005688;Transcript_010309;Transcript_025024;Transcript_046718;Transcript_047430;Transcript_078905;Transcript_150750;Transcript_166475;Transcript_172146;Transcript_175974
GO:0000186	P:activation_of_MAPKK_activity	10	0.0583728	Transcript_004120;Transcript_019423;Transcript_030486;Transcript_069251;Transcript_151330;Transcript_155512;Transcript_170156;Transcript_203093;Transcript_222945;Transcript_236927
GO:0009816	P:defense_response_to_bacterium,_incompatible_interaction	10	1.26044e-08	Transcript_010049;Transcript_014471;Transcript_024473;Transcript_044869;Transcript_050482;Transcript_130943;Transcript_149560;Transcript_169756;Transcript_184279;Transcript_244174
GO:0016709	F:oxidoreductase_activity,_acting_on_paired_donors,_with_incorporation_or_reduction_of_molecular_oxygen,_NAD(P)H_as_one_donor,_and_incorporation_of_one_atom_of_oxygen	10	8.47619e-05	Transcript_017735;Transcript_018274;Transcript_059655;Transcript_067506;Transcript_099845;Transcript_126589;Transcript_184091;Transcript_195900;Transcript_234517;Transcript_242260
GO:0009736	P:cytokinin-activated_signaling_pathway	10	4.4052e-08	Transcript_003163;Transcript_003795;Transcript_014041;Transcript_043724;Transcript_133564;Transcript_192512;Transcript_201458;Transcript_202823;Transcript_205967;Transcript_226575
GO:0008654	P:phospholipid_biosynthetic_process	10	8.46651e-07	Transcript_001446;Transcript_018828;Transcript_042164;Transcript_042453;Transcript_048279;Transcript_103216;Transcript_135001;Transcript_143270;Transcript_231645;Transcript_234081
GO:0010229	P:inflorescence_development	10	0.00737489	Transcript_027421;Transcript_030486;Transcript_047623;Transcript_069251;Transcript_095601;Transcript_146739;Transcript_151330;Transcript_155512;Transcript_158844;Transcript_218612
GO:0006890	P:retrograde_vesicle-mediated_transport,_Golgi_to_ER	10	3.81801e-06	Transcript_025243;Transcript_031234;Transcript_033836;Transcript_039940;Transcript_083590;Transcript_091553;Transcript_149510;Transcript_156034;Transcript_180639;Transcript_203894
GO:0003824	F:catalytic_activity_	10	3.81801e-06	Transcript_003949;Transcript_013878;Transcript_017534;Transcript_039649;Transcript_068441;Transcript_114125;Transcript_152619;Transcript_155513;Transcript_204880;Transcript_226005
GO:0009556	P:microsporogenesis	10	0.000723767	Transcript_000483;Transcript_009961;Transcript_018602;Transcript_041594;Transcript_045306;Transcript_160093;Transcript_224124;Transcript_237610;Transcript_239237;Transcript_239601
GO:0005852	C:eukaryotic_translation_initiation_factor_3_complex	10	1.05199e-07	Transcript_007023;Transcript_031321;Transcript_031853;Transcript_158371;Transcript_159811;Transcript_181439;Transcript_196649;Transcript_197517;Transcript_211481;Transcript_238208
GO:0004707	F:MAP_kinase_activity	10	6.36539e-05	Transcript_008319;Transcript_009299;Transcript_026329;Transcript_047623;Transcript_054038;Transcript_094325;Transcript_106529;Transcript_158592;Transcript_199440;Transcript_231762
GO:0009585	P:red,_far-red_light_phototransduction	10	9.59161e-12	Transcript_002009;Transcript_009778;Transcript_031196;Transcript_032257;Transcript_041388;Transcript_044869;Transcript_073836;Transcript_096112;Transcript_152679;Transcript_195229
GO:0005543	F:phospholipid_binding	10	3.21731e-08	Transcript_028795;Transcript_028954;Transcript_042756;Transcript_043347;Transcript_053375;Transcript_108370;Transcript_118043;Transcript_119865;Transcript_150515;Transcript_157742
GO:0007034	P:vacuolar_transport	10	4.78209e-05	Transcript_010295;Transcript_024907;Transcript_083038;Transcript_087118;Transcript_126621;Transcript_166731;Transcript_170293;Transcript_198712;Transcript_198729;Transcript_232583
GO:0006635	P:fatty_acid_beta-oxidation	10	4.4052e-08	Transcript_004033;Transcript_011381;Transcript_029830;Transcript_030915;Transcript_047567;Transcript_059679;Transcript_114161;Transcript_162000;Transcript_176842;Transcript_222906
GO:0010492	P:maintenance_of_shoot_apical_meristem_identity	10	0.0583728	Transcript_012605;Transcript_021469;Transcript_022788;Transcript_029817;Transcript_042738;Transcript_043195;Transcript_170790;Transcript_184529;Transcript_200447;Transcript_222148
GO:0016298	F:lipase_activity	10	0.000573905	Transcript_040126;Transcript_052882;Transcript_155971;Transcript_179910;Transcript_195679;Transcript_196913;Transcript_213127;Transcript_221871;Transcript_233312;Transcript_236732
ko00770	Pantothenate_and_CoA_biosynthesis	10	0.00161388	Transcript_005196;Transcript_043688;Transcript_053135;Transcript_078862;Transcript_103284;Transcript_165202;Transcript_173237;Transcript_173593;Transcript_200920;Transcript_211082
GO:0006002	P:fructose_6-phosphate_metabolic_process	10	0.165296	Transcript_009113;Transcript_013311;Transcript_024848;Transcript_034153;Transcript_034685;Transcript_036578;Transcript_063511;Transcript_091033;Transcript_150144;Transcript_241568
GO:0009744	P:response_to_sucrose	10	3.6361e-12	Transcript_006512;Transcript_007763;Transcript_015664;Transcript_025512;Transcript_029726;Transcript_068373;Transcript_104049;Transcript_149735;Transcript_169578;Transcript_188805
GO:0009627	P:systemic_acquired_resistance	10	2.82102e-06	Transcript_004819;Transcript_019060;Transcript_050482;Transcript_053538;Transcript_169756;Transcript_169833;Transcript_171029;Transcript_207404;Transcript_224903;Transcript_234786
ko00380	Tryptophan_metabolism	10	3.55007e-11	Transcript_012770;Transcript_052823;Transcript_151724;Transcript_151947;Transcript_174195;Transcript_187487;Transcript_206114;Transcript_212121;Transcript_222193;Transcript_232710
GO:0045335	C:phagocytic_vesicle	10	0.000945652	Transcript_022427;Transcript_029611;Transcript_086729;Transcript_089339;Transcript_106950;Transcript_109160;Transcript_114811;Transcript_140313;Transcript_156034;Transcript_187708
GO:0004565	F:beta-galactosidase_activity	10	0.0299444	Transcript_014047;Transcript_026887;Transcript_060632;Transcript_095362;Transcript_165791;Transcript_180068;Transcript_229200;Transcript_233658;Transcript_238013;Transcript_241356
ko00563	Glycosylphosphatidylinositol(GPI)-anchor_biosynthesis	10	0.165296	Transcript_004220;Transcript_030487;Transcript_035237;Transcript_036735;Transcript_087722;Transcript_154688;Transcript_178365;Transcript_191614;Transcript_235503;Transcript_236108
GO:0003714	F:transcription_corepressor_activity	10	0.0583728	Transcript_011753;Transcript_031096;Transcript_036517;Transcript_058742;Transcript_072542;Transcript_099676;Transcript_150574;Transcript_195086;Transcript_233011;Transcript_235910
GO:0033612	F:receptor_serine/threonine_kinase_binding	10	0.000108927	Transcript_000483;Transcript_018602;Transcript_040863;Transcript_045306;Transcript_053308;Transcript_144829;Transcript_165632;Transcript_175505;Transcript_237610;Transcript_239237
GO:0006814	P:sodium_ion_transport	10	4.6617e-07	Transcript_007167;Transcript_038170;Transcript_043084;Transcript_051885;Transcript_151225;Transcript_181291;Transcript_183390;Transcript_196785;Transcript_218264;Transcript_224834
ko00062	Fatty_acid_elongation	10	2.82102e-06	Transcript_005449;Transcript_013456;Transcript_017408;Transcript_017588;Transcript_017832;Transcript_117260;Transcript_173067;Transcript_190489;Transcript_200726;Transcript_233614
GO:0046930	C:pore_complex	10	0.0001129	Transcript_008525;Transcript_019608;Transcript_034168;Transcript_061583;Transcript_095344;Transcript_154795;Transcript_157270;Transcript_200823;Transcript_215454;Transcript_224735
ko04340	Hedgehog_signaling_pathway	10	7.75669e-08	Transcript_031110;Transcript_033297;Transcript_043420;Transcript_112850;Transcript_174237;Transcript_174453;Transcript_200106;Transcript_203354;Transcript_214887;Transcript_227246
ko04612	Antigen_processing_and_presentation	10	4.98356e-09	Transcript_006096;Transcript_015701;Transcript_032576;Transcript_040010;Transcript_071807;Transcript_130943;Transcript_159501;Transcript_164268;Transcript_198258;Transcript_238700
ko00900	Terpenoid_backbone_biosynthesis	10	8.01774e-18	Transcript_008740;Transcript_025098;Transcript_038475;Transcript_046252;Transcript_046543;Transcript_131589;Transcript_138447;Transcript_151724;Transcript_197211;Transcript_201678
GO:0009965	P:leaf_morphogenesis	10	2.91136e-14	Transcript_026723;Transcript_034176;Transcript_035659;Transcript_042364;Transcript_043998;Transcript_055435;Transcript_056416;Transcript_186273;Transcript_194978;Transcript_203408
GO:0000325	C:plant-type_vacuole	10	5.72499e-08	Transcript_001681;Transcript_014408;Transcript_028670;Transcript_138562;Transcript_165632;Transcript_192248;Transcript_205656;Transcript_218023;Transcript_227873;Transcript_233826
GO:0043234	C:protein_complex	10	1.84137e-11	Transcript_023019;Transcript_025512;Transcript_040636;Transcript_043233;Transcript_114295;Transcript_156034;Transcript_189510;Transcript_203491;Transcript_208901;Transcript_238224
ko05160	Hepatitis_C	10	0.00210729	Transcript_004120;Transcript_008779;Transcript_015425;Transcript_041704;Transcript_047623;Transcript_079199;Transcript_095402;Transcript_156614;Transcript_199440;Transcript_205655
GO:0016671	F:oxidoreductase_activity,_acting_on_a_sulfur_group_of_donors,_disulfide_as_acceptor	10	0.00204861	Transcript_002037;Transcript_006334;Transcript_018820;Transcript_025384;Transcript_034152;Transcript_037644;Transcript_039350;Transcript_043270;Transcript_201007;Transcript_201768
GO:0010043	P:response_to_zinc_ion	10	3.59437e-05	Transcript_004917;Transcript_045385;Transcript_052435;Transcript_074778;Transcript_147952;Transcript_152125;Transcript_158967;Transcript_185040;Transcript_187034;Transcript_202168
GO:0010494	C:cytoplasmic_stress_granule	10	0.000945652	Transcript_009321;Transcript_015332;Transcript_017864;Transcript_035672;Transcript_043672;Transcript_049530;Transcript_057902;Transcript_129497;Transcript_157705;Transcript_165027
GO:0031146	P:SCF-dependent_proteasomal_ubiquitin-dependent_protein_catabolic_process	10	0.00264913	Transcript_001927;Transcript_003398;Transcript_033045;Transcript_035428;Transcript_038302;Transcript_043997;Transcript_048789;Transcript_065703;Transcript_129322;Transcript_141551
GO:0019288	P:isopentenyl_diphosphate_biosynthetic_process,_methylerythritol_4-phosphate_pathway	10	4.6617e-07	Transcript_006334;Transcript_017003;Transcript_035659;Transcript_040416;Transcript_046252;Transcript_065706;Transcript_067971;Transcript_138447;Transcript_201007;Transcript_222250
ko05215	Prostate_cancer	10	6.03686e-08	Transcript_015701;Transcript_023790;Transcript_024392;Transcript_042195;Transcript_047623;Transcript_130943;Transcript_156614;Transcript_199440;Transcript_237083;Transcript_242230
GO:0048268	P:clathrin_coat_assembly	10	0.0191067	Transcript_003176;Transcript_007188;Transcript_014631;Transcript_016371;Transcript_045744;Transcript_098689;Transcript_167014;Transcript_175485;Transcript_178285;Transcript_238068
GO:0016363	C:nuclear_matrix	10	0.0149931	Transcript_006758;Transcript_007373;Transcript_009132;Transcript_042074;Transcript_045219;Transcript_154251;Transcript_187926;Transcript_211140;Transcript_223144;Transcript_243861
GO:0009543	C:chloroplast_thylakoid_lumen_	10	2.80465e-12	Transcript_051630;Transcript_060667;Transcript_102866;Transcript_158268;Transcript_168386;Transcript_182855;Transcript_187477;Transcript_203236;Transcript_223508;Transcript_224719
GO:0001666	P:response_to_hypoxia	10	3.21731e-08	Transcript_009755;Transcript_023790;Transcript_030423;Transcript_040010;Transcript_110129;Transcript_192580;Transcript_205797;Transcript_224903;Transcript_235577;Transcript_235590
GO:0004553	F:hydrolase_activity,_hydrolyzing_O-glycosyl_compounds	10	4.37776e-10	Transcript_055465;Transcript_067358;Transcript_096431;Transcript_144075;Transcript_183501;Transcript_190139;Transcript_196923;Transcript_209425;Transcript_227713;Transcript_234575
GO:0006108	P:malate_metabolic_process	10	2.82102e-06	Transcript_010158;Transcript_010583;Transcript_018852;Transcript_043024;Transcript_081537;Transcript_121125;Transcript_153108;Transcript_186303;Transcript_217483;Transcript_243672
GO:0009789	P:positive_regulation_of_abscisic_acid-activated_signaling_pathway	10	4.6617e-07	Transcript_014764;Transcript_023455;Transcript_028795;Transcript_031577;Transcript_118043;Transcript_119865;Transcript_150515;Transcript_173863;Transcript_229716;Transcript_241205
GO:0009644	P:response_to_high_light_intensity	10	0.000108927	Transcript_005368;Transcript_028700;Transcript_036696;Transcript_057360;Transcript_071807;Transcript_074044;Transcript_118013;Transcript_158761;Transcript_225582;Transcript_242801
ko04914	Progesterone-mediated_oocyte_maturation	10	3.55007e-11	Transcript_006688;Transcript_015701;Transcript_019957;Transcript_033497;Transcript_047623;Transcript_130943;Transcript_143107;Transcript_169395;Transcript_190505;Transcript_199440
GO:0004575	F:sucrose_alpha-glucosidase_activity	10	0.0149931	Transcript_003171;Transcript_008600;Transcript_023370;Transcript_029879;Transcript_043106;Transcript_063879;Transcript_131665;Transcript_149873;Transcript_165034;Transcript_170102
GO:0016597	F:amino_acid_binding_	10	5.0184e-12	Transcript_014725;Transcript_030653;Transcript_039351;Transcript_085588;Transcript_097039;Transcript_133869;Transcript_187678;Transcript_196494;Transcript_222192;Transcript_227398
GO:0000184	P:nuclear-transcribed_mRNA_catabolic_process,_nonsense-mediated_decay	9	1.88824e-08	Transcript_026774;Transcript_035131;Transcript_045092;Transcript_100799;Transcript_144914;Transcript_154664;Transcript_203024;Transcript_218022;Transcript_240436
GO:0008762	F:UDP-N-acetylmuramate_dehydrogenase_activity	9	1.09942e-05	Transcript_009263;Transcript_082723;Transcript_101286;Transcript_136647;Transcript_143038;Transcript_162943;Transcript_183649;Transcript_184819;Transcript_184868
ko00982	Drug_metabolism_-_cytochrome_P450	9	1.049e-05	Transcript_004917;Transcript_006794;Transcript_007351;Transcript_033768;Transcript_175977;Transcript_201523;Transcript_207404;Transcript_227823;Transcript_228302
GO:0008152	P:metabolic_process	9	7.65652e-09	Transcript_014725;Transcript_039351;Transcript_040126;Transcript_052882;Transcript_151721;Transcript_155971;Transcript_159777;Transcript_221871;Transcript_222192
GO:0008340	P:determination_of_adult_lifespan	9	0.007524	Transcript_030029;Transcript_036517;Transcript_052823;Transcript_063609;Transcript_209767;Transcript_233011;Transcript_233284;Transcript_235577;Transcript_240727
GO:0032259	P:methylation	9	0.00054815	Transcript_002320;Transcript_027094;Transcript_033752;Transcript_059896;Transcript_087173;Transcript_162126;Transcript_178447;Transcript_218764;Transcript_242086
GO:0051260	P:protein_homooligomerization	9	0.00054815	Transcript_007808;Transcript_031964;Transcript_040271;Transcript_042674;Transcript_167774;Transcript_193699;Transcript_217483;Transcript_222411;Transcript_243672
GO:0019773	C:proteasome_core_complex,_alpha-subunit_complex	9	0.00165305	Transcript_002519;Transcript_020907;Transcript_023679;Transcript_041803;Transcript_119508;Transcript_193398;Transcript_211140;Transcript_227451;Transcript_232384
GO:0009881	F:photoreceptor_activity	9	0.000184449	Transcript_007421;Transcript_024465;Transcript_086024;Transcript_089183;Transcript_113812;Transcript_156000;Transcript_156136;Transcript_176965;Transcript_243012
GO:0007517	P:muscle_organ_development	9	0.020077	Transcript_002541;Transcript_024445;Transcript_026179;Transcript_030990;Transcript_036517;Transcript_153242;Transcript_225114;Transcript_229005;Transcript_233011
GO:0008138	F:protein_tyrosine/serine/threonine_phosphatase_activity	9	0.000104165	Transcript_009742;Transcript_029928;Transcript_101941;Transcript_150580;Transcript_189882;Transcript_196766;Transcript_211939;Transcript_223537;Transcript_242230
GO:0051726	P:regulation_of_cell_cycle	9	5.55811e-09	Transcript_000103;Transcript_006726;Transcript_007314;Transcript_007763;Transcript_020201;Transcript_053402;Transcript_099676;Transcript_150816;Transcript_189492
GO:0045261	C:proton-transporting_ATP_synthase_complex,_catalytic_core_F(1)	9	0.00125486	Transcript_003976;Transcript_006117;Transcript_019100;Transcript_042379;Transcript_105369;Transcript_140692;Transcript_165487;Transcript_225649;Transcript_241801
GO:0008408	F:3'-5'_exonuclease_activity	9	0.00208249	Transcript_019818;Transcript_042282;Transcript_043968;Transcript_053332;Transcript_076505;Transcript_146024;Transcript_155544;Transcript_156640;Transcript_234110
ko04727	GABAergic_synapse	9	0.00054815	Transcript_011643;Transcript_027093;Transcript_051707;Transcript_153016;Transcript_155852;Transcript_162305;Transcript_197658;Transcript_198712;Transcript_224557
ko01040	Biosynthesis_of_unsaturated_fatty_acids	9	1.02404e-06	Transcript_013456;Transcript_028090;Transcript_028133;Transcript_095194;Transcript_152573;Transcript_160618;Transcript_186076;Transcript_204425;Transcript_233614
ko04623	Cytosolic_DNA-sensing_pathway	9	0.000952246	Transcript_016072;Transcript_031916;Transcript_173062;Transcript_193105;Transcript_209113;Transcript_222197;Transcript_229714;Transcript_231774;Transcript_241662
GO:0006098	P:pentose-phosphate_shunt	9	4.03661e-13	Transcript_001711;Transcript_010592;Transcript_018603;Transcript_034258;Transcript_035659;Transcript_044209;Transcript_142152;Transcript_167162;Transcript_216692
ko04391	Hippo_signaling_pathway_-_fly	9	4.55901e-05	Transcript_008779;Transcript_015425;Transcript_016618;Transcript_027594;Transcript_079199;Transcript_088161;Transcript_095402;Transcript_145801;Transcript_204486
GO:0005983	P:starch_catabolic_process	9	0.0640664	Transcript_009682;Transcript_016210;Transcript_032902;Transcript_101852;Transcript_104203;Transcript_136362;Transcript_162504;Transcript_179420;Transcript_189882
GO:0003872	F:6-phosphofructokinase_activity	9	0.151161	Transcript_009113;Transcript_013311;Transcript_024848;Transcript_034153;Transcript_036578;Transcript_091033;Transcript_150144;Transcript_188805;Transcript_241568
GO:0004806	F:triglyceride_lipase_activity_	9	0.00600404	Transcript_026440;Transcript_102735;Transcript_126565;Transcript_193198;Transcript_195679;Transcript_196913;Transcript_226282;Transcript_233312;Transcript_236732
GO:0000062	F:fatty-acyl-CoA_binding	9	0.000415944	Transcript_072738;Transcript_095194;Transcript_160008;Transcript_176842;Transcript_184559;Transcript_186076;Transcript_192580;Transcript_217546;Transcript_233770
GO:0046854	P:phosphatidylinositol_phosphorylation	9	1.05572e-08	Transcript_010331;Transcript_022710;Transcript_030019;Transcript_033079;Transcript_041983;Transcript_086967;Transcript_149739;Transcript_155584;Transcript_160090
GO:0000105	P:histidine_biosynthetic_process	9	5.89299e-05	Transcript_006397;Transcript_027516;Transcript_041186;Transcript_126758;Transcript_130140;Transcript_150387;Transcript_169361;Transcript_198040;Transcript_231508
ko05130	Pathogenic_Escherichia_coli_infection	9	3.2761e-06	Transcript_012650;Transcript_088161;Transcript_103380;Transcript_129988;Transcript_194999;Transcript_197380;Transcript_215001;Transcript_228587;Transcript_229002
ko04520	Adherens_junction	9	1.24155e-07	Transcript_024392;Transcript_042195;Transcript_042857;Transcript_047623;Transcript_088161;Transcript_141684;Transcript_188900;Transcript_199440;Transcript_237083
GO:0032040	C:small-subunit_processome	9	2.42467e-06	Transcript_023503;Transcript_038940;Transcript_053224;Transcript_089564;Transcript_100674;Transcript_127726;Transcript_192735;Transcript_234329;Transcript_244120
GO:0007338	P:single_fertilization	9	0.007524	Transcript_019032;Transcript_024725;Transcript_042164;Transcript_060807;Transcript_160559;Transcript_185260;Transcript_216653;Transcript_218401;Transcript_242855
ko04540	Gap_junction	9	0.000104165	Transcript_012650;Transcript_047623;Transcript_103380;Transcript_169578;Transcript_197380;Transcript_199440;Transcript_215001;Transcript_228587;Transcript_229002
GO:0010305	P:leaf_vascular_tissue_pattern_formation	9	0.000415944	Transcript_004665;Transcript_004797;Transcript_093409;Transcript_099685;Transcript_164508;Transcript_218673;Transcript_230255;Transcript_237975;Transcript_243025
GO:0004650	F:polygalacturonase_activity	9	1.3843e-08	Transcript_009961;Transcript_013644;Transcript_038636;Transcript_158999;Transcript_195399;Transcript_196219;Transcript_209806;Transcript_222225;Transcript_242272
GO:0009790	P:embryo_development	9	0.0411293	Transcript_008627;Transcript_014745;Transcript_018408;Transcript_029272;Transcript_029451;Transcript_034670;Transcript_040636;Transcript_126578;Transcript_188346
ko04020	Calcium_signaling_pathway	9	2.72578e-12	Transcript_008525;Transcript_019608;Transcript_034168;Transcript_045165;Transcript_093127;Transcript_095344;Transcript_128738;Transcript_227948;Transcript_233863
GO:0008143	F:poly(A)_binding	9	0.000952246	Transcript_009321;Transcript_015332;Transcript_028118;Transcript_035672;Transcript_129497;Transcript_147869;Transcript_157705;Transcript_162333;Transcript_243637
GO:0004535	F:poly(A)-specific_ribonuclease_activity	9	0.00354019	Transcript_023597;Transcript_034257;Transcript_053332;Transcript_066186;Transcript_112846;Transcript_146024;Transcript_155544;Transcript_155992;Transcript_222288
GO:0009058	P:biosynthetic_process	9	2.55713e-11	Transcript_005417;Transcript_013197;Transcript_022475;Transcript_049636;Transcript_146010;Transcript_149588;Transcript_183260;Transcript_209645;Transcript_222892
GO:0005351	F:sugar:proton_symporter_activity	9	5.99415e-06	Transcript_018878;Transcript_056316;Transcript_102803;Transcript_115595;Transcript_152593;Transcript_170368;Transcript_199478;Transcript_204201;Transcript_222095
ko00350	Tyrosine_metabolism	9	2.193e-07	Transcript_007351;Transcript_023489;Transcript_049636;Transcript_102866;Transcript_161507;Transcript_162032;Transcript_182855;Transcript_201523;Transcript_227823
GO:0032197	P:transposition,_RNA-mediated	9	0.00208249	Transcript_020507;Transcript_025591;Transcript_032060;Transcript_032348;Transcript_044239;Transcript_045095;Transcript_133159;Transcript_149605;Transcript_152805
GO:0042538	P:hyperosmotic_salinity_response	9	4.42988e-06	Transcript_016803;Transcript_023383;Transcript_024241;Transcript_033391;Transcript_038744;Transcript_041825;Transcript_059679;Transcript_171817;Transcript_238834
GO:0005736	C:DNA-directed_RNA_polymerase_I_complex_	9	0.0205956	Transcript_031916;Transcript_058931;Transcript_065708;Transcript_128231;Transcript_173062;Transcript_193105;Transcript_209113;Transcript_229714;Transcript_241662
ko04723	Retrograde_endocannabinoid_signaling	9	0.0999822	Transcript_011643;Transcript_027093;Transcript_028562;Transcript_038170;Transcript_047623;Transcript_153016;Transcript_198712;Transcript_199440;Transcript_240923
ko04270	Vascular_smooth_muscle_contraction	9	5.99415e-06	Transcript_023681;Transcript_043524;Transcript_047441;Transcript_047623;Transcript_154666;Transcript_169578;Transcript_199440;Transcript_230920;Transcript_231986
GO:0009911	P:positive_regulation_of_flower_development	9	1.71225e-10	Transcript_027421;Transcript_027562;Transcript_046510;Transcript_095601;Transcript_113812;Transcript_136999;Transcript_146739;Transcript_158844;Transcript_176529
GO:0009574	C:preprophase_band	9	0.020077	Transcript_034795;Transcript_053053;Transcript_097854;Transcript_105213;Transcript_160093;Transcript_179685;Transcript_195799;Transcript_224124;Transcript_229436
GO:0090501	P:RNA_phosphodiester_bond_hydrolysis	9	0.000184449	Transcript_009033;Transcript_025591;Transcript_032348;Transcript_036090;Transcript_042738;Transcript_045095;Transcript_102338;Transcript_149605;Transcript_178073
GO:0006825	P:copper_ion_transport	9	1.40555e-05	Transcript_027524;Transcript_036142;Transcript_040354;Transcript_143133;Transcript_149249;Transcript_154412;Transcript_161060;Transcript_199001;Transcript_214132
GO:0018024	F:histone-lysine_N-methyltransferase_activity	9	2.97945e-07	Transcript_044742;Transcript_134298;Transcript_154229;Transcript_154699;Transcript_181525;Transcript_192455;Transcript_220474;Transcript_234965;Transcript_242098
GO:0006506	P:GPI_anchor_biosynthetic_process	9	0.00072248	Transcript_004220;Transcript_019295;Transcript_030487;Transcript_035237;Transcript_087722;Transcript_154688;Transcript_191614;Transcript_204842;Transcript_234247
ko04912	GnRH_signaling_pathway	9	1.09942e-05	Transcript_004067;Transcript_023455;Transcript_031577;Transcript_047623;Transcript_129190;Transcript_199440;Transcript_203093;Transcript_229716;Transcript_241205
GO:0006352	P:DNA-templated_transcription,_initiation	9	1.88461e-05	Transcript_004938;Transcript_010969;Transcript_011935;Transcript_040271;Transcript_043652;Transcript_044412;Transcript_177714;Transcript_226722;Transcript_229655
GO:0015934	C:large_ribosomal_subunit_	9	0.000104165	Transcript_028113;Transcript_032227;Transcript_042410;Transcript_045453;Transcript_101940;Transcript_128538;Transcript_175332;Transcript_195062;Transcript_239454
GO:0008299	P:isoprenoid_biosynthetic_process	9	1.70459e-07	Transcript_023464;Transcript_045549;Transcript_123817;Transcript_131589;Transcript_151724;Transcript_155438;Transcript_197211;Transcript_220348;Transcript_228961
GO:0003684	F:damaged_DNA_binding	9	7.51182e-07	Transcript_013610;Transcript_030874;Transcript_039757;Transcript_041509;Transcript_079313;Transcript_105991;Transcript_111551;Transcript_225942;Transcript_233134
GO:0071805	P:potassium_ion_transmembrane_transport	9	1.02404e-06	Transcript_010535;Transcript_016549;Transcript_017464;Transcript_028518;Transcript_059299;Transcript_179999;Transcript_192811;Transcript_213359;Transcript_225155
GO:0009862	P:systemic_acquired_resistance,_salicylic_acid_mediated_signaling_pathway	9	8.11578e-06	Transcript_001711;Transcript_025090;Transcript_040126;Transcript_046799;Transcript_052882;Transcript_065706;Transcript_155971;Transcript_221871;Transcript_224903
ko03420	Nucleotide_excision_repair	9	3.80739e-12	Transcript_002009;Transcript_019818;Transcript_030179;Transcript_043968;Transcript_067779;Transcript_105991;Transcript_186407;Transcript_224812;Transcript_227541
ko04140	Regulation_of_autophagy	9	5.99415e-06	Transcript_000594;Transcript_011423;Transcript_035021;Transcript_087118;Transcript_096467;Transcript_216217;Transcript_224557;Transcript_242031;Transcript_242610
GO:0006360	P:transcription_from_RNA_polymerase_I_promoter	9	0.0124792	Transcript_031916;Transcript_058931;Transcript_065708;Transcript_128231;Transcript_173062;Transcript_193105;Transcript_209113;Transcript_229714;Transcript_241662
GO:0005578	C:proteinaceous_extracellular_matrix	9	0.00072248	Transcript_022801;Transcript_043713;Transcript_067358;Transcript_106459;Transcript_143270;Transcript_196923;Transcript_229373;Transcript_237798;Transcript_240825
GO:0080008	C:Cul4-RING_E3_ubiquitin_ligase_complex	9	1.24233e-10	Transcript_021276;Transcript_028389;Transcript_071500;Transcript_119369;Transcript_160504;Transcript_176179;Transcript_202991;Transcript_203137;Transcript_229743
GO:0032147	P:activation_of_protein_kinase_activity	9	0.00969437	Transcript_014297;Transcript_030486;Transcript_069251;Transcript_086608;Transcript_151330;Transcript_155512;Transcript_168093;Transcript_170156;Transcript_238155
GO:0051865	P:protein_autoubiquitination	9	3.2761e-06	Transcript_033473;Transcript_053673;Transcript_117141;Transcript_121020;Transcript_158397;Transcript_186094;Transcript_188612;Transcript_191408;Transcript_199000
GO:0016168	F:chlorophyll_binding	9	1.19981e-09	Transcript_004200;Transcript_004378;Transcript_013668;Transcript_014016;Transcript_021843;Transcript_022303;Transcript_042701;Transcript_065295;Transcript_106769
GO:0006367	P:transcription_initiation_from_RNA_polymerase_II_promoter	9	0.0205956	Transcript_009107;Transcript_021333;Transcript_038604;Transcript_040271;Transcript_048787;Transcript_068441;Transcript_122934;Transcript_152619;Transcript_227952
GO:0009294	P:DNA_mediated_transformation	9	0.00125486	Transcript_006356;Transcript_020507;Transcript_033196;Transcript_062005;Transcript_096477;Transcript_141447;Transcript_154436;Transcript_200415;Transcript_217250
GO:0031348	P:negative_regulation_of_defense_response	9	4.51172e-10	Transcript_001711;Transcript_020740;Transcript_033045;Transcript_043997;Transcript_053375;Transcript_065706;Transcript_075498;Transcript_175505;Transcript_224903
GO:0005815	C:microtubule_organizing_center	9	0.000415944	Transcript_006722;Transcript_015020;Transcript_033297;Transcript_045243;Transcript_074422;Transcript_124992;Transcript_175887;Transcript_232924;Transcript_238155
ko04966	Collecting_duct_acid_secretion	9	2.97945e-07	Transcript_009551;Transcript_014408;Transcript_016602;Transcript_024398;Transcript_073956;Transcript_190353;Transcript_218023;Transcript_227873;Transcript_240650
GO:0008284	P:positive_regulation_of_cell_proliferation	8	2.54413e-07	Transcript_001067;Transcript_019060;Transcript_034176;Transcript_123202;Transcript_201011;Transcript_222288;Transcript_229005;Transcript_230670
ko04915	Estrogen_signaling_pathway	8	1.56902e-06	Transcript_015701;Transcript_023790;Transcript_040010;Transcript_047623;Transcript_071807;Transcript_130943;Transcript_164268;Transcript_199440
GO:0009411	P:response_to_UV	8	5.4669e-05	Transcript_017864;Transcript_024465;Transcript_041186;Transcript_067779;Transcript_086024;Transcript_089183;Transcript_130140;Transcript_156136
GO:0003779	F:actin_binding_	8	2.344e-05	Transcript_002541;Transcript_018358;Transcript_030990;Transcript_124476;Transcript_136647;Transcript_217964;Transcript_225114;Transcript_238224
ko05131	Shigellosis	8	1.30494e-11	Transcript_027953;Transcript_042857;Transcript_047623;Transcript_088161;Transcript_129988;Transcript_141684;Transcript_194999;Transcript_199440
GO:0042176	P:regulation_of_protein_catabolic_process	8	0.169344	Transcript_016835;Transcript_026804;Transcript_061441;Transcript_129307;Transcript_189492;Transcript_223135;Transcript_224261;Transcript_229924
GO:0030054	C:cell_junction_	8	0.000132548	Transcript_023500;Transcript_031951;Transcript_038170;Transcript_087812;Transcript_147440;Transcript_195381;Transcript_224619;Transcript_231139
GO:0010311	P:lateral_root_formation	8	8.44292e-07	Transcript_003398;Transcript_063879;Transcript_088168;Transcript_156621;Transcript_194933;Transcript_223409;Transcript_232327;Transcript_240107
GO:0005355	F:glucose_transmembrane_transporter_activity	8	0.000303566	Transcript_018878;Transcript_056316;Transcript_102803;Transcript_115595;Transcript_152593;Transcript_167572;Transcript_170368;Transcript_204201
GO:0000151	C:ubiquitin_ligase_complex	8	6.96324e-06	Transcript_019837;Transcript_053673;Transcript_103122;Transcript_143822;Transcript_158397;Transcript_186094;Transcript_188612;Transcript_210055
GO:0006383	P:transcription_from_RNA_polymerase_III_promoter	8	0.00462049	Transcript_016072;Transcript_031916;Transcript_173062;Transcript_193105;Transcript_209113;Transcript_222197;Transcript_229714;Transcript_241662
GO:1902600	P:hydrogen_ion_transmembrane_transport	8	7.17742e-08	Transcript_007607;Transcript_037763;Transcript_042281;Transcript_045823;Transcript_173256;Transcript_223677;Transcript_225112;Transcript_242346
GO:0034605	P:cellular_response_to_heat	8	3.81099e-06	Transcript_009468;Transcript_015332;Transcript_022042;Transcript_031964;Transcript_035672;Transcript_129497;Transcript_157705;Transcript_235910
GO:0005388	F:calcium-transporting_ATPase_activity	8	8.04509e-09	Transcript_013794;Transcript_024725;Transcript_039324;Transcript_093127;Transcript_191698;Transcript_232630;Transcript_235413;Transcript_236646
GO:0016592	C:mediator_complex_	8	2.35301e-09	Transcript_019060;Transcript_023781;Transcript_032795;Transcript_157154;Transcript_194964;Transcript_232598;Transcript_232880;Transcript_243348
GO:0005938	C:cell_cortex_	8	3.99697e-06	Transcript_018358;Transcript_037116;Transcript_042567;Transcript_173514;Transcript_194999;Transcript_232493;Transcript_236927;Transcript_238732
GO:0048527	P:lateral_root_development	8	0.000920174	Transcript_018451;Transcript_201458;Transcript_205967;Transcript_222339;Transcript_223409;Transcript_225665;Transcript_236713;Transcript_243318
GO:0030048	P:actin_filament-based_movement	8	0.00210056	Transcript_032662;Transcript_037311;Transcript_043011;Transcript_088341;Transcript_122611;Transcript_153903;Transcript_161890;Transcript_238732
ko05014	Amyotrophic_lateral_sclerosis_(ALS)	8	5.24301e-08	Transcript_012770;Transcript_042857;Transcript_052823;Transcript_141684;Transcript_174195;Transcript_187487;Transcript_224735;Transcript_227948
GO:0048367	P:shoot_system_development	8	5.24301e-08	Transcript_020317;Transcript_025098;Transcript_038475;Transcript_039009;Transcript_124944;Transcript_209704;Transcript_235950;Transcript_242551
GO:0006012	P:galactose_metabolic_process	8	4.0732e-05	Transcript_003524;Transcript_017955;Transcript_018345;Transcript_074885;Transcript_159777;Transcript_174469;Transcript_229106;Transcript_235702
GO:0030145	F:manganese_ion_binding	8	2.11461e-08	Transcript_054888;Transcript_075688;Transcript_152682;Transcript_154853;Transcript_173800;Transcript_195375;Transcript_230958;Transcript_236454
GO:0030131	C:clathrin_adaptor_complex_	8	0.000951845	Transcript_039901;Transcript_053642;Transcript_180120;Transcript_192887;Transcript_198286;Transcript_203894;Transcript_232922;Transcript_243030
GO:0006450	P:regulation_of_translational_fidelity	8	0.406135	Transcript_013980;Transcript_018213;Transcript_025658;Transcript_089022;Transcript_110572;Transcript_227594;Transcript_238069;Transcript_239789
GO:0051603	P:proteolysis_involved_in_cellular_protein_catabolic_process	8	1.31478e-10	Transcript_003919;Transcript_006096;Transcript_016807;Transcript_064646;Transcript_169399;Transcript_192076;Transcript_194001;Transcript_211140
ko04930	Type_II_diabetes_mellitus	8	0.000171629	Transcript_005220;Transcript_006512;Transcript_015664;Transcript_018566;Transcript_037817;Transcript_043127;Transcript_047623;Transcript_199440
GO:0016791	F:phosphatase_activity	8	0.00121162	Transcript_005103;Transcript_016492;Transcript_049193;Transcript_103216;Transcript_158442;Transcript_198319;Transcript_234367;Transcript_243566
ko04961	Endocrine_and_other_factor-regulated_calcium_reabsorption	8	4.0732e-05	Transcript_014860;Transcript_018980;Transcript_036792;Transcript_039901;Transcript_194460;Transcript_198286;Transcript_227992;Transcript_243030
GO:0016747	F:transferase_activity,_transferring_acyl_groups_other_than_amino-acyl_groups	8	0.000715349	Transcript_005449;Transcript_017588;Transcript_017832;Transcript_072463;Transcript_173067;Transcript_190489;Transcript_196184;Transcript_200726
GO:0033926	F:glycopeptide_alpha-N-acetylgalactosaminidase_activity	8	0.257199	Transcript_008600;Transcript_023370;Transcript_029879;Transcript_043106;Transcript_063879;Transcript_131665;Transcript_165034;Transcript_170102
GO:0003713	F:transcription_coactivator_activity	8	3.99697e-06	Transcript_015301;Transcript_040271;Transcript_069802;Transcript_152070;Transcript_155861;Transcript_166987;Transcript_168817;Transcript_226188
GO:0009620	P:response_to_fungus	8	9.9595e-12	Transcript_099505;Transcript_125015;Transcript_167963;Transcript_176842;Transcript_186273;Transcript_203408;Transcript_205797;Transcript_222945
GO:0046323	P:glucose_import	8	4.0732e-05	Transcript_018878;Transcript_056316;Transcript_102803;Transcript_115595;Transcript_152593;Transcript_167572;Transcript_170368;Transcript_204201
ko04360	Axon_guidance	8	1.31478e-10	Transcript_032864;Transcript_042857;Transcript_047623;Transcript_088340;Transcript_141684;Transcript_190112;Transcript_199440;Transcript_227948
GO:0009788	P:negative_regulation_of_abscisic_acid-activated_signaling_pathway	8	5.4669e-05	Transcript_025098;Transcript_032683;Transcript_038475;Transcript_152263;Transcript_216653;Transcript_218401;Transcript_222945;Transcript_234844
ko02010	ABC_transporters	8	9.42301e-06	Transcript_042504;Transcript_114161;Transcript_149692;Transcript_220512;Transcript_225665;Transcript_228752;Transcript_236713;Transcript_244139
GO:0072686	C:mitotic_spindle	8	0.035073	Transcript_015088;Transcript_034795;Transcript_108137;Transcript_168817;Transcript_195799;Transcript_226188;Transcript_228720;Transcript_229436
GO:0010411	P:xyloglucan_metabolic_process	8	2.39949e-10	Transcript_055465;Transcript_144075;Transcript_183501;Transcript_190139;Transcript_222814;Transcript_227713;Transcript_234575;Transcript_241441
ko04710	Circadian_rhythm	8	3.17907e-05	Transcript_010389;Transcript_011423;Transcript_024752;Transcript_027923;Transcript_028007;Transcript_041585;Transcript_105439;Transcript_216217
GO:0034220	P:ion_transmembrane_transport	8	2.54413e-07	Transcript_005688;Transcript_024398;Transcript_046718;Transcript_061583;Transcript_078905;Transcript_130404;Transcript_166475;Transcript_175974
GO:0000775	C:chromosome,_centromeric_region_	8	9.42301e-06	Transcript_044359;Transcript_057704;Transcript_079199;Transcript_127726;Transcript_153520;Transcript_156034;Transcript_177955;Transcript_220474
GO:0000902	P:cell_morphogenesis	8	0.0132017	Transcript_006722;Transcript_017135;Transcript_086303;Transcript_106950;Transcript_137510;Transcript_153014;Transcript_200106;Transcript_238919
ko00450	Selenocompound_metabolism	8	4.81376e-07	Transcript_006334;Transcript_021173;Transcript_034344;Transcript_039594;Transcript_119864;Transcript_133775;Transcript_201007;Transcript_235577
GO:0010023	P:proanthocyanidin_biosynthetic_process	8	2.9247e-06	Transcript_007607;Transcript_037763;Transcript_042281;Transcript_045823;Transcript_173256;Transcript_223677;Transcript_225112;Transcript_242346
GO:0006865	P:amino_acid_transport	8	4.81376e-07	Transcript_016022;Transcript_046161;Transcript_140331;Transcript_160126;Transcript_186448;Transcript_198712;Transcript_235331;Transcript_241047
GO:0006357	P:regulation_of_transcription_from_RNA_polymerase_II_promoter	8	4.04573e-08	Transcript_015301;Transcript_016829;Transcript_024653;Transcript_031675;Transcript_072542;Transcript_195086;Transcript_206649;Transcript_236149
GO:0006623	P:protein_targeting_to_vacuole	8	8.44292e-07	Transcript_004788;Transcript_024907;Transcript_042319;Transcript_087118;Transcript_172485;Transcript_174694;Transcript_196575;Transcript_244730
GO:0036459	F:ubiquitinyl_hydrolase_activity	8	0.017115	Transcript_003383;Transcript_008420;Transcript_030627;Transcript_030639;Transcript_043350;Transcript_121332;Transcript_149633;Transcript_199957
ko04962	Vasopressin-regulated_water_reabsorption	8	0.00053753	Transcript_018980;Transcript_036792;Transcript_065850;Transcript_108137;Transcript_161256;Transcript_194460;Transcript_227992;Transcript_234993
GO:0019722	P:calcium-mediated_signaling	8	3.49826e-07	Transcript_028054;Transcript_037791;Transcript_047515;Transcript_056334;Transcript_103871;Transcript_135343;Transcript_172245;Transcript_227948
GO:0003886	F:DNA_(cytosine-5-)-methyltransferase_activity	8	0.452789	Transcript_007485;Transcript_016154;Transcript_062005;Transcript_141447;Transcript_149881;Transcript_162688;Transcript_200415;Transcript_213248
GO:0010231	P:maintenance_of_seed_dormancy	8	3.99697e-06	Transcript_007607;Transcript_037763;Transcript_042281;Transcript_045823;Transcript_173256;Transcript_223677;Transcript_225112;Transcript_242346
GO:0016023	C:cytoplasmic_membrane-bounded_vesicle	8	0.000132548	Transcript_012753;Transcript_143038;Transcript_149925;Transcript_166166;Transcript_184868;Transcript_209100;Transcript_223248;Transcript_235503
GO:0005666	C:DNA-directed_RNA_polymerase_III_complex	8	0.00462049	Transcript_016072;Transcript_031916;Transcript_173062;Transcript_193105;Transcript_209113;Transcript_222197;Transcript_229714;Transcript_241662
GO:0043023	F:ribosomal_large_subunit_binding	8	0.537461	Transcript_006150;Transcript_013587;Transcript_019177;Transcript_020812;Transcript_040561;Transcript_196575;Transcript_199376;Transcript_233979
ko00531	Glycosaminoglycan_degradation	8	0.375931	Transcript_008082;Transcript_014047;Transcript_021879;Transcript_042164;Transcript_175406;Transcript_186964;Transcript_187980;Transcript_214162
GO:0000281	P:mitotic_cytokinesis	8	0.00159543	Transcript_014610;Transcript_025213;Transcript_088161;Transcript_175416;Transcript_177201;Transcript_204764;Transcript_229005;Transcript_238732
ko04530	Tight_junction	8	3.03664e-05	Transcript_008779;Transcript_015425;Transcript_079199;Transcript_088161;Transcript_095402;Transcript_188900;Transcript_238732;Transcript_242230
ko00603	Glycosphingolipid_biosynthesis_-_globo_series	8	0.017115	Transcript_008082;Transcript_021879;Transcript_042164;Transcript_113727;Transcript_128118;Transcript_175406;Transcript_186964;Transcript_204880
GO:0016820	F:hydrolase_activity,_acting_on_acid_anhydrides,_catalyzing_transmembrane_movement_of_substances	8	0.0166321	Transcript_006117;Transcript_018319;Transcript_024398;Transcript_160320;Transcript_172831;Transcript_190353;Transcript_231595;Transcript_241801
GO:0035428	P:hexose_transmembrane_transport	8	4.0732e-05	Transcript_018878;Transcript_056316;Transcript_102803;Transcript_115595;Transcript_152593;Transcript_167572;Transcript_170368;Transcript_204201
GO:0009097	P:isoleucine_biosynthetic_process	8	0.00601401	Transcript_005196;Transcript_011576;Transcript_053135;Transcript_103284;Transcript_132357;Transcript_149811;Transcript_217539;Transcript_227398
GO:0000724	P:double-strand_break_repair_via_homologous_recombination	8	4.81376e-07	Transcript_029817;Transcript_055435;Transcript_100752;Transcript_155998;Transcript_222659;Transcript_226697;Transcript_228251;Transcript_241339
GO:0010027	P:thylakoid_membrane_organization	8	9.86287e-05	Transcript_000380;Transcript_006334;Transcript_016146;Transcript_029445;Transcript_029613;Transcript_044209;Transcript_193446;Transcript_201007
GO:0042023	P:DNA_endoreduplication	8	0.0213592	Transcript_017135;Transcript_051439;Transcript_089108;Transcript_168705;Transcript_184046;Transcript_203552;Transcript_209655;Transcript_232803
GO:0010114	P:response_to_red_light	8	9.42309e-11	Transcript_006393;Transcript_022042;Transcript_022821;Transcript_027868;Transcript_042701;Transcript_044209;Transcript_065295;Transcript_224354
GO:0016459	C:myosin_complex_	8	7.34137e-05	Transcript_026702;Transcript_032662;Transcript_037311;Transcript_043011;Transcript_088341;Transcript_122611;Transcript_153903;Transcript_188014
GO:0009637	P:response_to_blue_light	8	1.21946e-09	Transcript_042701;Transcript_043998;Transcript_044209;Transcript_065295;Transcript_113812;Transcript_225665;Transcript_228200;Transcript_236713
GO:0004714	F:transmembrane_receptor_protein_tyrosine_kinase_activity	8	0.0273935	Transcript_013468;Transcript_018602;Transcript_029482;Transcript_035219;Transcript_040863;Transcript_044176;Transcript_230500;Transcript_237610
ko00130	Ubiquinone_and_other_terpenoid-quinone_biosynthesis	8	0.00053753	Transcript_050781;Transcript_059088;Transcript_059896;Transcript_072743;Transcript_126589;Transcript_129672;Transcript_148379;Transcript_209010
GO:0006665	P:sphingolipid_metabolic_process	8	0.000303566	Transcript_005417;Transcript_013456;Transcript_042796;Transcript_108668;Transcript_152714;Transcript_204880;Transcript_222136;Transcript_230666
GO:0016853	F:isomerase_activity	8	0.00478106	Transcript_015019;Transcript_032690;Transcript_044679;Transcript_046471;Transcript_064376;Transcript_100919;Transcript_101166;Transcript_225000
GO:0004471	F:malate_dehydrogenase_(decarboxylating)_(NAD+)_activity	8	0.0166321	Transcript_018852;Transcript_043024;Transcript_081537;Transcript_121125;Transcript_153108;Transcript_186303;Transcript_217483;Transcript_243672
GO:0009791	P:post-embryonic_development	8	6.2012e-07	Transcript_015662;Transcript_018689;Transcript_044759;Transcript_081099;Transcript_117260;Transcript_195679;Transcript_216653;Transcript_218401
GO:0005685	C:U1_snRNP	8	0.00210056	Transcript_020644;Transcript_172408;Transcript_185589;Transcript_191863;Transcript_197498;Transcript_213172;Transcript_240682;Transcript_244667
ko00750	Vitamin_B6_metabolism	8	0.000132548	Transcript_001997;Transcript_039649;Transcript_150349;Transcript_162588;Transcript_169792;Transcript_216341;Transcript_231744;Transcript_243566
GO:0010090	P:trichome_morphogenesis	8	6.96324e-06	Transcript_025912;Transcript_072463;Transcript_086303;Transcript_104987;Transcript_129988;Transcript_153014;Transcript_153903;Transcript_193892
GO:0010267	P:production_of_ta-siRNAs_involved_in_RNA_interference	8	0.00276478	Transcript_020317;Transcript_033998;Transcript_042738;Transcript_102338;Transcript_178073;Transcript_201646;Transcript_222659;Transcript_235950
GO:0009740	P:gibberellic_acid_mediated_signaling_pathway	8	1.34889e-07	Transcript_009778;Transcript_016103;Transcript_017992;Transcript_043724;Transcript_100071;Transcript_148803;Transcript_231436;Transcript_242774
GO:0042127	P:regulation_of_cell_proliferation	8	0.00276478	Transcript_029817;Transcript_055435;Transcript_098798;Transcript_101166;Transcript_121475;Transcript_158529;Transcript_167869;Transcript_222618
GO:0090406	C:pollen_tube	8	3.81099e-06	Transcript_002525;Transcript_023111;Transcript_036595;Transcript_056316;Transcript_191414;Transcript_225459;Transcript_232859;Transcript_239721
GO:0005838	C:proteasome_regulatory_particle	8	0.017115	Transcript_009434;Transcript_016835;Transcript_026804;Transcript_084750;Transcript_129307;Transcript_133564;Transcript_186885;Transcript_208722
GO:0051082	F:unfolded_protein_binding	8	7.34137e-05	Transcript_002237;Transcript_015001;Transcript_033704;Transcript_044265;Transcript_046510;Transcript_075930;Transcript_094276;Transcript_232637
GO:0009986	C:cell_surface_	8	0.000403918	Transcript_003919;Transcript_008058;Transcript_012490;Transcript_016492;Transcript_023489;Transcript_032576;Transcript_088475;Transcript_234367
ko00980	Metabolism_of_xenobiotics_by_cytochrome_P450	8	1.56902e-06	Transcript_004917;Transcript_006794;Transcript_007351;Transcript_033768;Transcript_175977;Transcript_201523;Transcript_227823;Transcript_228302
GO:0007033	P:vacuole_organization	8	5.14937e-06	Transcript_001532;Transcript_008627;Transcript_010331;Transcript_018886;Transcript_020411;Transcript_041983;Transcript_238224;Transcript_238978
GO:0022891	F:substrate-specific_transmembrane_transporter_activity	8	4.24486e-09	Transcript_000914;Transcript_009044;Transcript_018520;Transcript_027489;Transcript_053129;Transcript_107059;Transcript_204201;Transcript_230685
GO:0006302	P:double-strand_break_repair	8	0.0132017	Transcript_014890;Transcript_017909;Transcript_021459;Transcript_023823;Transcript_025477;Transcript_031964;Transcript_196258;Transcript_204204
GO:0008121	F:ubiquinol-cytochrome-c_reductase_activity	8	0.000132548	Transcript_001711;Transcript_004875;Transcript_028203;Transcript_038425;Transcript_090672;Transcript_213769;Transcript_220959;Transcript_240592
GO:0031398	P:positive_regulation_of_protein_ubiquitination	8	0.0885519	Transcript_003919;Transcript_044265;Transcript_053673;Transcript_158397;Transcript_186094;Transcript_186885;Transcript_188612;Transcript_243861
GO:0009944	P:polarity_specification_of_adaxial/abaxial_axis	7	3.26973e-06	Transcript_008650;Transcript_011563;Transcript_042738;Transcript_043478;Transcript_079178;Transcript_205797;Transcript_227776
GO:0006122	P:mitochondrial_electron_transport,_ubiquinol_to_cytochrome_c	7	0.000288426	Transcript_004875;Transcript_038425;Transcript_041726;Transcript_167686;Transcript_220959;Transcript_230128;Transcript_240592
GO:0051117	F:ATPase_binding	7	0.0174419	Transcript_006757;Transcript_016602;Transcript_019467;Transcript_094348;Transcript_218023;Transcript_222867;Transcript_232386
GO:0000922	C:spindle_pole	7	0.000503325	Transcript_006722;Transcript_036750;Transcript_124992;Transcript_150565;Transcript_157447;Transcript_195799;Transcript_232508
GO:0009870	P:defense_response_signaling_pathway,_resistance_gene-dependent	7	0.520153	Transcript_066093;Transcript_083547;Transcript_186273;Transcript_203408;Transcript_203430;Transcript_207404;Transcript_229743
GO:0004022	F:alcohol_dehydrogenase_(NAD)_activity	7	0.000891093	Transcript_007351;Transcript_040557;Transcript_097232;Transcript_162032;Transcript_191814;Transcript_207790;Transcript_227823
GO:0006891	P:intra-Golgi_vesicle-mediated_transport	7	8.37179e-06	Transcript_031234;Transcript_033836;Transcript_159446;Transcript_174694;Transcript_180639;Transcript_209232;Transcript_244730
GO:0006526	P:arginine_biosynthetic_process	7	0.013896	Transcript_002106;Transcript_010249;Transcript_043320;Transcript_076001;Transcript_156069;Transcript_199699;Transcript_237938
GO:0000070	P:mitotic_sister_chromatid_segregation	7	0.121412	Transcript_008054;Transcript_015088;Transcript_033907;Transcript_087162;Transcript_132402;Transcript_228251;Transcript_228274
GO:0006378	P:mRNA_polyadenylation	7	9.24094e-05	Transcript_025855;Transcript_033998;Transcript_043984;Transcript_188942;Transcript_202518;Transcript_222734;Transcript_224674
GO:0030127	C:COPII_vesicle_coat_	7	0.00355454	Transcript_020271;Transcript_023927;Transcript_034210;Transcript_041095;Transcript_043014;Transcript_044796;Transcript_187317
GO:0016760	F:cellulose_synthase_(UDP-forming)_activity	7	2.47522e-10	Transcript_006525;Transcript_015028;Transcript_023383;Transcript_036895;Transcript_055435;Transcript_222855;Transcript_236780
GO:0030904	C:retromer_complex	7	0.862001	Transcript_014566;Transcript_024907;Transcript_031641;Transcript_043347;Transcript_090283;Transcript_109160;Transcript_227496
GO:0055088	P:lipid_homeostasis	7	0.0080773	Transcript_050096;Transcript_072738;Transcript_095194;Transcript_149410;Transcript_176842;Transcript_184559;Transcript_186076
GO:0009765	P:photosynthesis,_light_harvesting	7	5.18505e-07	Transcript_004378;Transcript_013668;Transcript_021843;Transcript_022303;Transcript_042701;Transcript_065295;Transcript_106769
ko00220	Arginine_biosynthesis	7	2.19034e-08	Transcript_002106;Transcript_027419;Transcript_030653;Transcript_049636;Transcript_051707;Transcript_130536;Transcript_161218
GO:0019915	P:lipid_storage	7	0.0226124	Transcript_004587;Transcript_019100;Transcript_027199;Transcript_042164;Transcript_042738;Transcript_173237;Transcript_227161
GO:0071215	P:cellular_response_to_abscisic_acid_stimulus	7	3.26973e-06	Transcript_004316;Transcript_034176;Transcript_094065;Transcript_112174;Transcript_144006;Transcript_226625;Transcript_241339
GO:0010102	P:lateral_root_morphogenesis_	7	0.000387948	Transcript_007373;Transcript_035219;Transcript_042074;Transcript_109733;Transcript_152640;Transcript_191790;Transcript_230500
GO:0009867	P:jasmonic_acid_mediated_signaling_pathway	7	3.34303e-11	Transcript_001711;Transcript_009778;Transcript_033045;Transcript_043997;Transcript_044178;Transcript_065706;Transcript_242774
GO:0008134	F:transcription_factor_binding	7	0.000288426	Transcript_026179;Transcript_027562;Transcript_036517;Transcript_153990;Transcript_186885;Transcript_225156;Transcript_233011
GO:0006535	P:cysteine_biosynthetic_process_from_serine	7	0.0370286	Transcript_018351;Transcript_043513;Transcript_062960;Transcript_089717;Transcript_089849;Transcript_142719;Transcript_231485
GO:0016114	P:terpenoid_biosynthetic_process	7	8.31978e-09	Transcript_007170;Transcript_017003;Transcript_026722;Transcript_040416;Transcript_067971;Transcript_151721;Transcript_185499
GO:0007015	P:actin_filament_organization	7	8.83679e-05	Transcript_007592;Transcript_013687;Transcript_044365;Transcript_086303;Transcript_124476;Transcript_129988;Transcript_232552
GO:0006754	P:ATP_biosynthetic_process	7	0.000214469	Transcript_002930;Transcript_006117;Transcript_015538;Transcript_020544;Transcript_074671;Transcript_087147;Transcript_241801
GO:0042493	P:response_to_drug	7	8.83679e-05	Transcript_008740;Transcript_027025;Transcript_096227;Transcript_111101;Transcript_114161;Transcript_151294;Transcript_205458
ko05142	Chagas_disease_(American_trypanosomiasis)	7	3.69096e-05	Transcript_008779;Transcript_015425;Transcript_030038;Transcript_047623;Transcript_079199;Transcript_095402;Transcript_199440
GO:0010182	P:sugar_mediated_signaling_pathway	7	8.75691e-10	Transcript_004587;Transcript_027199;Transcript_042738;Transcript_188402;Transcript_191814;Transcript_216217;Transcript_229743
GO:0000418	C:DNA-directed_RNA_polymerase_IV_complex	7	0.0106015	Transcript_031916;Transcript_166058;Transcript_170193;Transcript_193105;Transcript_209113;Transcript_229714;Transcript_241662
GO:0006071	P:glycerol_metabolic_process	7	6.80321e-05	Transcript_023146;Transcript_029762;Transcript_031349;Transcript_059666;Transcript_111101;Transcript_177019;Transcript_236167
GO:1902183	P:regulation_of_shoot_apical_meristem_development	7	0.00209939	Transcript_011563;Transcript_079178;Transcript_079355;Transcript_176851;Transcript_199478;Transcript_205797;Transcript_225407
GO:0004630	F:phospholipase_D_activity	7	0.00614782	Transcript_004067;Transcript_023455;Transcript_031577;Transcript_129190;Transcript_159486;Transcript_229716;Transcript_241205
GO:0000175	F:3'-5'-exoribonuclease_activity	7	0.0027014	Transcript_007852;Transcript_053332;Transcript_072702;Transcript_146024;Transcript_155544;Transcript_219623;Transcript_222288
GO:0010029	P:regulation_of_seed_germination	7	1.14768e-08	Transcript_019837;Transcript_029879;Transcript_040537;Transcript_103122;Transcript_170102;Transcript_202823;Transcript_210055
GO:0006813	P:potassium_ion_transport	7	5.81539e-08	Transcript_007167;Transcript_008620;Transcript_052207;Transcript_151225;Transcript_172485;Transcript_182590;Transcript_218264
GO:0006909	P:phagocytosis	7	6.11558e-06	Transcript_019100;Transcript_028824;Transcript_099676;Transcript_173514;Transcript_194999;Transcript_200106;Transcript_238919
GO:0010204	P:defense_response_signaling_pathway,_resistance_gene-independent	7	0.733948	Transcript_008619;Transcript_020798;Transcript_165742;Transcript_185018;Transcript_185876;Transcript_207404;Transcript_229743
GO:0006406	P:mRNA_export_from_nucleus	7	9.24094e-05	Transcript_004587;Transcript_018681;Transcript_027199;Transcript_154664;Transcript_156971;Transcript_166987;Transcript_201646
GO:0017069	F:snRNA_binding	7	0.190189	Transcript_013999;Transcript_129755;Transcript_143454;Transcript_205480;Transcript_215554;Transcript_237032;Transcript_240682
GO:0006189	P:'de_novo'_IMP_biosynthetic_process	7	0.00118588	Transcript_006402;Transcript_037790;Transcript_129165;Transcript_158567;Transcript_188257;Transcript_204878;Transcript_228479
GO:0032880	P:regulation_of_protein_localization	7	0.0978591	Transcript_020969;Transcript_024241;Transcript_026698;Transcript_041825;Transcript_194105;Transcript_222677;Transcript_229781
GO:0009846	P:pollen_germination	7	8.75691e-10	Transcript_022105;Transcript_064290;Transcript_151724;Transcript_158371;Transcript_160559;Transcript_223762;Transcript_242855
GO:0009932	P:cell_tip_growth	7	0.00118588	Transcript_010192;Transcript_153199;Transcript_169479;Transcript_204554;Transcript_225842;Transcript_236167;Transcript_241829
GO:0005102	F:receptor_binding	7	0.00209939	Transcript_015290;Transcript_023489;Transcript_049193;Transcript_049359;Transcript_089339;Transcript_091674;Transcript_204880
GO:0045727	P:positive_regulation_of_translation	7	9.24094e-05	Transcript_017864;Transcript_018408;Transcript_019177;Transcript_028700;Transcript_049530;Transcript_126578;Transcript_198713
GO:0006839	P:mitochondrial_transport	7	0.0226124	Transcript_002810;Transcript_048191;Transcript_090184;Transcript_120207;Transcript_174520;Transcript_195626;Transcript_241883
ko05031	Amphetamine_addiction	7	1.48076e-05	Transcript_023681;Transcript_043524;Transcript_047441;Transcript_154666;Transcript_227948;Transcript_230920;Transcript_231986
GO:0032436	P:positive_regulation_of_proteasomal_ubiquitin-dependent_protein_catabolic_process	7	0.00355454	Transcript_031964;Transcript_044265;Transcript_053673;Transcript_158397;Transcript_186094;Transcript_186885;Transcript_188612
GO:0016442	C:RISC_complex	7	0.0604869	Transcript_042738;Transcript_043672;Transcript_087162;Transcript_098798;Transcript_102338;Transcript_178073;Transcript_235627
GO:0006464	P:cellular_protein_modification_process	7	0.0378152	Transcript_030085;Transcript_031758;Transcript_037375;Transcript_040305;Transcript_101941;Transcript_109625;Transcript_192756
GO:0022904	P:respiratory_electron_transport_chain	7	0.0604869	Transcript_033355;Transcript_036517;Transcript_054538;Transcript_157745;Transcript_187278;Transcript_196980;Transcript_233011
GO:0000165	P:MAPK_cascade	7	1.99189e-07	Transcript_001711;Transcript_009299;Transcript_065706;Transcript_094325;Transcript_203093;Transcript_222945;Transcript_236927
GO:0015630	C:microtubule_cytoskeleton	7	0.0473707	Transcript_015088;Transcript_030766;Transcript_057704;Transcript_104987;Transcript_149849;Transcript_177955;Transcript_193892
ko04139	Regulation_of_mitophagy_-_yeast	7	1.14768e-08	Transcript_005006;Transcript_007313;Transcript_149739;Transcript_188900;Transcript_197498;Transcript_201800;Transcript_224557
GO:0048262	P:determination_of_dorsal/ventral_asymmetry	7	0.0770503	Transcript_008035;Transcript_012568;Transcript_024492;Transcript_190750;Transcript_204028;Transcript_222430;Transcript_233613
GO:0030245	P:cellulose_catabolic_process	7	0.00157806	Transcript_028765;Transcript_040589;Transcript_120801;Transcript_150961;Transcript_161776;Transcript_227491;Transcript_233858
GO:0003730	F:mRNA_3'-UTR_binding	7	0.00157806	Transcript_017864;Transcript_018408;Transcript_126578;Transcript_148611;Transcript_154329;Transcript_172064;Transcript_188942
ko00650	Butanoate_metabolism	7	8.06653e-08	Transcript_038975;Transcript_151724;Transcript_153764;Transcript_155852;Transcript_162305;Transcript_197658;Transcript_233238
ko05202	Transcriptional_misregulation_in_cancer	7	4.196e-08	Transcript_011139;Transcript_036517;Transcript_194853;Transcript_201800;Transcript_226445;Transcript_232386;Transcript_233011
GO:0009688	P:abscisic_acid_biosynthetic_process	7	0.0770503	Transcript_017531;Transcript_103119;Transcript_111801;Transcript_170551;Transcript_191814;Transcript_234806;Transcript_238834
GO:0061025	P:membrane_fusion	7	1.48076e-05	Transcript_016956;Transcript_018689;Transcript_040509;Transcript_181725;Transcript_191620;Transcript_224557;Transcript_230474
GO:0015793	P:glycerol_transport	7	1.09357e-05	Transcript_005688;Transcript_025024;Transcript_046718;Transcript_078905;Transcript_166475;Transcript_175974;Transcript_204842
GO:0009934	P:regulation_of_meristem_structural_organization	7	0.0134379	Transcript_009121;Transcript_029817;Transcript_083500;Transcript_158529;Transcript_165632;Transcript_179708;Transcript_230255
ko05211	Renal_cell_carcinoma	7	1.45057e-07	Transcript_024392;Transcript_042195;Transcript_042857;Transcript_047623;Transcript_141684;Transcript_199440;Transcript_237083
GO:0016117	P:carotenoid_biosynthetic_process	7	9.85119e-07	Transcript_006334;Transcript_044209;Transcript_046471;Transcript_064376;Transcript_139224;Transcript_201007;Transcript_213758
GO:0055028	C:cortical_microtubule	7	0.00118588	Transcript_053053;Transcript_084439;Transcript_089102;Transcript_105213;Transcript_195799;Transcript_209023;Transcript_227945
GO:0000159	C:protein_phosphatase_type_2A_complex	7	2.72055e-05	Transcript_005547;Transcript_007119;Transcript_008779;Transcript_015425;Transcript_043723;Transcript_095402;Transcript_225739
GO:0007030	P:Golgi_organization	7	1.7534e-06	Transcript_013087;Transcript_017571;Transcript_018602;Transcript_023362;Transcript_035136;Transcript_202427;Transcript_237610
GO:0070290	F:N-acylphosphatidylethanolamine-specific_phospholipase_D_activity	7	0.00614782	Transcript_004067;Transcript_023455;Transcript_031577;Transcript_129190;Transcript_159486;Transcript_229716;Transcript_241205
GO:0071472	P:cellular_response_to_salt_stress	7	0.000669638	Transcript_043420;Transcript_112174;Transcript_198713;Transcript_203354;Transcript_226575;Transcript_227246;Transcript_241851
GO:0009631	P:cold_acclimation	7	9.24094e-05	Transcript_010061;Transcript_017452;Transcript_019060;Transcript_023351;Transcript_023779;Transcript_044869;Transcript_228819
ko05204	Chemical_carcinogenesis	7	2.39345e-06	Transcript_004917;Transcript_006794;Transcript_033768;Transcript_175977;Transcript_201523;Transcript_227823;Transcript_228302
ko00590	Arachidonic_acid_metabolism	7	3.26973e-06	Transcript_007947;Transcript_049193;Transcript_102735;Transcript_164613;Transcript_192605;Transcript_198319;Transcript_226282
GO:0008810	F:cellulase_activity	7	0.00209939	Transcript_028765;Transcript_040589;Transcript_120801;Transcript_150961;Transcript_161776;Transcript_227491;Transcript_233858
GO:0015937	P:coenzyme_A_biosynthetic_process	7	0.236487	Transcript_043688;Transcript_078862;Transcript_103338;Transcript_165202;Transcript_173237;Transcript_173593;Transcript_200920
GO:0048825	P:cotyledon_development	7	0.000288426	Transcript_012490;Transcript_030597;Transcript_031010;Transcript_043106;Transcript_095601;Transcript_133564;Transcript_229743
GO:0010078	P:maintenance_of_root_meristem_identity	7	0.121412	Transcript_021469;Transcript_022788;Transcript_029817;Transcript_042756;Transcript_170790;Transcript_200447;Transcript_222148
GO:0051604	P:protein_maturation	7	0.190189	Transcript_009033;Transcript_014566;Transcript_021055;Transcript_040834;Transcript_043347;Transcript_193568;Transcript_227496
GO:0070588	P:calcium_ion_transmembrane_transport	7	6.35781e-09	Transcript_033582;Transcript_039324;Transcript_056334;Transcript_103871;Transcript_158996;Transcript_235413;Transcript_236646
GO:0010103	P:stomatal_complex_morphogenesis	7	0.00118588	Transcript_030486;Transcript_069251;Transcript_151330;Transcript_155512;Transcript_183649;Transcript_197054;Transcript_222241
GO:0006401	P:RNA_catabolic_process	7	0.0473707	Transcript_007852;Transcript_023948;Transcript_044789;Transcript_059207;Transcript_072702;Transcript_219623;Transcript_237277
GO:0009835	P:fruit_ripening	7	0.0174419	Transcript_000599;Transcript_001112;Transcript_017401;Transcript_165002;Transcript_168703;Transcript_202387;Transcript_242272
GO:0043005	C:neuron_projection	7	0.121412	Transcript_011643;Transcript_038170;Transcript_044878;Transcript_051617;Transcript_195381;Transcript_225156;Transcript_240649
GO:0007155	P:cell_adhesion	7	1.48076e-05	Transcript_003262;Transcript_016927;Transcript_030209;Transcript_044365;Transcript_104797;Transcript_233284;Transcript_234015
GO:0005762	C:mitochondrial_large_ribosomal_subunit_	7	0.00209939	Transcript_019412;Transcript_026167;Transcript_033717;Transcript_147440;Transcript_152038;Transcript_207805;Transcript_209973
GO:0052696	P:flavonoid_glucuronidation	7	2.72055e-05	Transcript_011058;Transcript_037922;Transcript_195704;Transcript_195757;Transcript_205051;Transcript_207369;Transcript_244801
GO:0072593	P:reactive_oxygen_species_metabolic_process	7	0.013896	Transcript_043387;Transcript_049193;Transcript_052823;Transcript_154251;Transcript_187926;Transcript_198631;Transcript_233238
GO:0019706	F:protein-cysteine_S-palmitoyltransferase_activity	7	4.47018e-06	Transcript_023746;Transcript_153199;Transcript_170834;Transcript_194231;Transcript_204554;Transcript_217368;Transcript_222015
ko04380	Osteoclast_differentiation	7	6.35781e-09	Transcript_016492;Transcript_042857;Transcript_047623;Transcript_141684;Transcript_199440;Transcript_227948;Transcript_234367
GO:0005992	P:trehalose_biosynthetic_process	7	3.26973e-06	Transcript_009468;Transcript_010204;Transcript_021222;Transcript_033866;Transcript_045129;Transcript_158937;Transcript_236429
GO:0000155	F:phosphorelay_sensor_kinase_activity	7	1.28558e-06	Transcript_012127;Transcript_035817;Transcript_176965;Transcript_192512;Transcript_202823;Transcript_211380;Transcript_225540
GO:0030976	F:thiamine_pyrophosphate_binding	7	0.00355454	Transcript_000852;Transcript_015290;Transcript_016685;Transcript_042962;Transcript_149811;Transcript_222193;Transcript_230204
ko04112	Cell_cycle_-_Caulobacter	7	8.37179e-06	Transcript_021946;Transcript_025157;Transcript_047691;Transcript_060720;Transcript_098320;Transcript_100629;Transcript_209520
GO:0043209	C:myelin_sheath	7	8.37179e-06	Transcript_003919;Transcript_023019;Transcript_023489;Transcript_031964;Transcript_032576;Transcript_216692;Transcript_228587
GO:0006261	P:DNA-dependent_DNA_replication	7	0.00279164	Transcript_037258;Transcript_038151;Transcript_154232;Transcript_155116;Transcript_186407;Transcript_222659;Transcript_224812
ko02020	Two-component_system	7	0.00118588	Transcript_004875;Transcript_006968;Transcript_032949;Transcript_038425;Transcript_051707;Transcript_151724;Transcript_213769
GO:0010025	P:wax_biosynthetic_process	7	5.01001e-05	Transcript_013456;Transcript_026571;Transcript_033551;Transcript_124696;Transcript_165651;Transcript_169987;Transcript_200726
GO:0006366	P:transcription_from_RNA_polymerase_II_promoter	7	4.86177e-10	Transcript_031916;Transcript_079006;Transcript_096996;Transcript_173062;Transcript_196766;Transcript_197498;Transcript_219696
GO:0000302	P:response_to_reactive_oxygen_species	7	0.00118588	Transcript_005368;Transcript_009299;Transcript_052435;Transcript_060720;Transcript_094325;Transcript_161697;Transcript_187708
GO:0000103	P:sulfate_assimilation	7	1.14665e-05	Transcript_034152;Transcript_034344;Transcript_037644;Transcript_043076;Transcript_201768;Transcript_234463;Transcript_243537
GO:0004602	F:glutathione_peroxidase_activity	7	0.000521819	Transcript_004917;Transcript_006794;Transcript_007947;Transcript_011301;Transcript_164417;Transcript_175977;Transcript_192605
GO:0035196	P:production_of_miRNAs_involved_in_gene_silencing_by_miRNA	7	0.0770503	Transcript_019177;Transcript_033998;Transcript_042738;Transcript_052769;Transcript_112168;Transcript_187640;Transcript_222659
GO:0010304	P:PSII_associated_light-harvesting_complex_II_catabolic_process	7	0.236487	Transcript_000076;Transcript_020969;Transcript_026698;Transcript_042887;Transcript_044209;Transcript_099841;Transcript_222677
GO:0006094	P:gluconeogenesis	7	0.0001187	Transcript_104492;Transcript_188373;Transcript_189036;Transcript_189170;Transcript_196575;Transcript_196697;Transcript_230776
GO:0009699	P:phenylpropanoid_biosynthetic_process	7	0.430335	Transcript_004501;Transcript_021886;Transcript_034417;Transcript_170743;Transcript_191388;Transcript_195900;Transcript_204500
GO:0090503	P:RNA_phosphodiester_bond_hydrolysis,_exonucleolytic	7	0.00279164	Transcript_007852;Transcript_053332;Transcript_072702;Transcript_146024;Transcript_155544;Transcript_219623;Transcript_222288
GO:0008308	F:voltage-gated_anion_channel_activity	7	0.00279164	Transcript_008525;Transcript_019608;Transcript_034168;Transcript_095344;Transcript_131771;Transcript_200823;Transcript_215454
GO:0009825	P:multidimensional_cell_growth	7	7.14433e-07	Transcript_084439;Transcript_086303;Transcript_089102;Transcript_098619;Transcript_209023;Transcript_227945;Transcript_243720
GO:0006614	P:SRP-dependent_cotranslational_protein_targeting_to_membrane	7	0.00157806	Transcript_014392;Transcript_026774;Transcript_047481;Transcript_120833;Transcript_192756;Transcript_196849;Transcript_205458
GO:0000022	P:mitotic_spindle_elongation	7	6.11558e-06	Transcript_017028;Transcript_036865;Transcript_041704;Transcript_108190;Transcript_173665;Transcript_200794;Transcript_205655
GO:0005884	C:actin_filament_	7	0.0604869	Transcript_032610;Transcript_032864;Transcript_042319;Transcript_088161;Transcript_088340;Transcript_106950;Transcript_238919
GO:0000228	C:nuclear_chromosome	6	0.00207545	Transcript_020201;Transcript_036865;Transcript_038151;Transcript_154232;Transcript_209767;Transcript_235339
GO:0015450	F:P-P-bond-hydrolysis-driven_protein_transmembrane_transporter_activity	6	0.000146006	Transcript_008257;Transcript_010660;Transcript_014839;Transcript_026510;Transcript_044726;Transcript_057837
GO:0016688	F:L-ascorbate_peroxidase_activity	6	0.0655574	Transcript_018511;Transcript_023351;Transcript_115742;Transcript_133451;Transcript_161697;Transcript_210608
GO:0006400	P:tRNA_modification	6	0.0393139	Transcript_009244;Transcript_013980;Transcript_017700;Transcript_034176;Transcript_083364;Transcript_216128
GO:0070696	F:transmembrane_receptor_protein_serine/threonine_kinase_binding	6	0.0082661	Transcript_016151;Transcript_018451;Transcript_094065;Transcript_154239;Transcript_189146;Transcript_222339
GO:0070402	F:NADPH_binding	6	0.000469059	Transcript_001997;Transcript_150349;Transcript_162588;Transcript_169792;Transcript_216341;Transcript_242079
GO:0004197	F:cysteine-type_endopeptidase_activity	6	2.27414e-16	Transcript_006096;Transcript_030639;Transcript_064646;Transcript_170841;Transcript_198258;Transcript_201678
ko04918	Thyroid_hormone_synthesis	6	0.00622151	Transcript_003919;Transcript_007947;Transcript_008733;Transcript_014164;Transcript_023790;Transcript_192605
GO:0009630	P:gravitropism	6	0.00114549	Transcript_010897;Transcript_022105;Transcript_056334;Transcript_103871;Transcript_171072;Transcript_179685
GO:0035267	C:NuA4_histone_acetyltransferase_complex	6	0.0843344	Transcript_007752;Transcript_020316;Transcript_025469;Transcript_044732;Transcript_162985;Transcript_175659
GO:0009086	P:methionine_biosynthetic_process	6	1.04817e-06	Transcript_022580;Transcript_057381;Transcript_085588;Transcript_179651;Transcript_229757;Transcript_234665
GO:0004540	F:ribonuclease_activity	6	0.000850619	Transcript_009033;Transcript_025591;Transcript_032348;Transcript_043219;Transcript_045095;Transcript_149605
GO:0009504	C:cell_plate_	6	2.89917e-07	Transcript_003962;Transcript_010535;Transcript_175654;Transcript_191620;Transcript_225155;Transcript_227992
GO:0016049	P:cell_growth	6	2.89917e-07	Transcript_021276;Transcript_037116;Transcript_155519;Transcript_162607;Transcript_232493;Transcript_244120
GO:0005801	C:cis-Golgi_network_	6	6.78565e-06	Transcript_012474;Transcript_039940;Transcript_083590;Transcript_091553;Transcript_167282;Transcript_232479
GO:0000082	P:G1/S_transition_of_mitotic_cell_cycle	6	0.0035157	Transcript_007763;Transcript_040271;Transcript_043672;Transcript_096227;Transcript_186885;Transcript_218022
GO:0016866	F:intramolecular_transferase_activity	6	0.00467835	Transcript_009832;Transcript_011644;Transcript_015340;Transcript_161067;Transcript_181640;Transcript_231441
GO:0017157	P:regulation_of_exocytosis	6	0.0843344	Transcript_017829;Transcript_051617;Transcript_089339;Transcript_139716;Transcript_230798;Transcript_243719
GO:0070370	P:cellular_heat_acclimation	6	0.00467835	Transcript_057334;Transcript_060767;Transcript_158566;Transcript_188471;Transcript_199505;Transcript_210758
GO:0010152	P:pollen_maturation	6	0.00467835	Transcript_000483;Transcript_008627;Transcript_018602;Transcript_045306;Transcript_237610;Transcript_239237
ko04933	AGE-RAGE_signaling_pathway_in_diabetic_complications	6	3.99261e-07	Transcript_042857;Transcript_047623;Transcript_128738;Transcript_141684;Transcript_199440;Transcript_238705
GO:0009099	P:valine_biosynthetic_process	6	0.0311154	Transcript_005196;Transcript_011576;Transcript_053135;Transcript_103284;Transcript_149811;Transcript_227398
GO:0009298	P:GDP-mannose_biosynthetic_process	6	0.00264093	Transcript_012141;Transcript_031292;Transcript_037736;Transcript_158967;Transcript_212135;Transcript_235002
GO:0010216	P:maintenance_of_DNA_methylation	6	0.0393139	Transcript_042738;Transcript_102338;Transcript_144874;Transcript_153520;Transcript_167400;Transcript_178073
GO:0048511	P:rhythmic_process	6	3.83617e-06	Transcript_016364;Transcript_029398;Transcript_152123;Transcript_168855;Transcript_189510;Transcript_243012
GO:0030173	C:integral_component_of_Golgi_membrane_	6	0.000348418	Transcript_017571;Transcript_018389;Transcript_035136;Transcript_123202;Transcript_209232;Transcript_230670
ko00920	Sulfur_metabolism	6	2.89917e-07	Transcript_018351;Transcript_034344;Transcript_043513;Transcript_086967;Transcript_142719;Transcript_177103
GO:0043424	F:protein_histidine_kinase_binding	6	4.95502e-06	Transcript_014041;Transcript_014463;Transcript_021033;Transcript_034963;Transcript_202823;Transcript_208899
GO:0016324	C:apical_plasma_membrane	6	1.04817e-06	Transcript_024398;Transcript_027025;Transcript_028530;Transcript_060807;Transcript_160320;Transcript_238732
ko04750	Inflammatory_mediator_regulation_of_TRP_channels	6	0.0035157	Transcript_023681;Transcript_043524;Transcript_047441;Transcript_154666;Transcript_230920;Transcript_231986
GO:0009228	P:thiamine_biosynthetic_process	6	0.000198694	Transcript_026722;Transcript_036006;Transcript_037382;Transcript_090030;Transcript_216293;Transcript_224977
GO:0042773	P:ATP_synthesis_coupled_electron_transport	6	0.00622151	Transcript_001489;Transcript_062205;Transcript_062246;Transcript_219022;Transcript_222418;Transcript_235632
GO:0006289	P:nucleotide-excision_repair	6	1.14263e-07	Transcript_035428;Transcript_039757;Transcript_041578;Transcript_067779;Transcript_105991;Transcript_111551
GO:0006878	P:cellular_copper_ion_homeostasis	6	0.0311154	Transcript_027524;Transcript_040354;Transcript_161060;Transcript_161507;Transcript_175091;Transcript_192867
GO:0007267	P:cell-cell_signaling	6	6.78565e-06	Transcript_006686;Transcript_033998;Transcript_042738;Transcript_172245;Transcript_183966;Transcript_222659
GO:0051015	F:actin_filament_binding	6	9.29935e-06	Transcript_020276;Transcript_023262;Transcript_033079;Transcript_106950;Transcript_149739;Transcript_226296
GO:0030148	P:sphingolipid_biosynthetic_process	6	0.00198343	Transcript_008648;Transcript_017548;Transcript_152714;Transcript_174866;Transcript_184122;Transcript_233614
GO:0008553	F:hydrogen-exporting_ATPase_activity,_phosphorylative_mechanism	6	0.00154221	Transcript_002930;Transcript_015538;Transcript_020544;Transcript_074671;Transcript_087147;Transcript_183515
GO:0010222	P:stem_vascular_tissue_pattern_formation	6	0.0311154	Transcript_021013;Transcript_024904;Transcript_036997;Transcript_047222;Transcript_104892;Transcript_153060
GO:0004712	F:protein_serine/threonine/tyrosine_kinase_activity	6	2.89917e-07	Transcript_019961;Transcript_081569;Transcript_151250;Transcript_222945;Transcript_240726;Transcript_241592
GO:0048040	F:UDP-glucuronate_decarboxylase_activity	6	0.0303608	Transcript_006882;Transcript_043198;Transcript_061770;Transcript_075566;Transcript_098084;Transcript_219818
GO:0006368	P:transcription_elongation_from_RNA_polymerase_II_promoter	6	0.000469059	Transcript_044619;Transcript_087929;Transcript_139660;Transcript_166987;Transcript_227122;Transcript_228720
GO:0009654	C:photosystem_II_oxygen_evolving_complex	6	5.80529e-05	Transcript_009197;Transcript_021310;Transcript_032957;Transcript_036840;Transcript_158268;Transcript_162684
GO:0019985	P:translesion_synthesis	6	0.0843344	Transcript_031964;Transcript_042282;Transcript_053673;Transcript_089195;Transcript_186094;Transcript_188612
GO:0010026	P:trichome_differentiation	6	0.0311154	Transcript_017135;Transcript_023146;Transcript_043724;Transcript_076341;Transcript_155116;Transcript_236167
GO:0042393	F:histone_binding	6	1.14263e-07	Transcript_058742;Transcript_111101;Transcript_144287;Transcript_214684;Transcript_229005;Transcript_240717
GO:0042026	P:protein_refolding	6	2.89917e-07	Transcript_002237;Transcript_004354;Transcript_016668;Transcript_044265;Transcript_046510;Transcript_094276
GO:0015250	F:water_channel_activity	6	0.000107319	Transcript_005688;Transcript_025024;Transcript_046718;Transcript_078905;Transcript_166475;Transcript_175974
GO:0004715	F:non-membrane_spanning_protein_tyrosine_kinase_activity	6	0.0181482	Transcript_004120;Transcript_015406;Transcript_117006;Transcript_152100;Transcript_158163;Transcript_171409
GO:0030247	F:polysaccharide_binding	6	4.27311e-05	Transcript_010309;Transcript_015326;Transcript_042994;Transcript_047430;Transcript_150750;Transcript_172146
ko00196	Photosynthesis_-_antenna_proteins	6	0.00207545	Transcript_004378;Transcript_021843;Transcript_022303;Transcript_042701;Transcript_065295;Transcript_106769
GO:0006954	P:inflammatory_response	6	0.0237843	Transcript_023489;Transcript_049193;Transcript_185260;Transcript_198319;Transcript_209425;Transcript_210373
GO:0051017	P:actin_filament_bundle_assembly	6	0.000270432	Transcript_020276;Transcript_023262;Transcript_081056;Transcript_193252;Transcript_226296;Transcript_232900
GO:0016272	C:prefoldin_complex	6	0.0393139	Transcript_047460;Transcript_149991;Transcript_172741;Transcript_197015;Transcript_222325;Transcript_242567
GO:0016762	F:xyloglucan:xyloglucosyl_transferase_activity	6	8.21849e-08	Transcript_055465;Transcript_144075;Transcript_183501;Transcript_190139;Transcript_227713;Transcript_234575
GO:0005249	F:voltage-gated_potassium_channel_activity	6	0.000348418	Transcript_010535;Transcript_017464;Transcript_179999;Transcript_192811;Transcript_213359;Transcript_225155
GO:0015030	C:Cajal_body	6	0.00207545	Transcript_159964;Transcript_184279;Transcript_190646;Transcript_205480;Transcript_237032;Transcript_244120
GO:0043130	F:ubiquitin_binding	6	3.83617e-06	Transcript_008746;Transcript_011918;Transcript_184326;Transcript_189492;Transcript_189510;Transcript_234795
GO:0044550	P:secondary_metabolite_biosynthetic_process	6	0.0181482	Transcript_059655;Transcript_067506;Transcript_126589;Transcript_184091;Transcript_234517;Transcript_242260
GO:0009693	P:ethylene_biosynthetic_process	6	0.0237843	Transcript_000599;Transcript_010828;Transcript_041453;Transcript_046373;Transcript_165002;Transcript_168703
GO:0004012	F:phospholipid-translocating_ATPase_activity	6	0.00467835	Transcript_003320;Transcript_032853;Transcript_039009;Transcript_209704;Transcript_242551;Transcript_243746
ko05416	Viral_myocarditis	6	2.40254e-05	Transcript_010897;Transcript_042857;Transcript_088161;Transcript_141684;Transcript_171072;Transcript_243390
GO:0042391	P:regulation_of_membrane_potential	6	4.27311e-05	Transcript_010535;Transcript_017464;Transcript_179999;Transcript_192811;Transcript_213359;Transcript_225155
GO:0006817	P:phosphate_ion_transport	6	2.40254e-05	Transcript_085884;Transcript_108075;Transcript_163943;Transcript_232193;Transcript_235960;Transcript_236686
GO:0006904	P:vesicle_docking_involved_in_exocytosis	6	2.00259e-06	Transcript_017829;Transcript_021055;Transcript_089339;Transcript_139716;Transcript_230798;Transcript_243719
GO:0003712	F:transcription_cofactor_activity	6	0.000348418	Transcript_024392;Transcript_042195;Transcript_091308;Transcript_196794;Transcript_235627;Transcript_237083
GO:0019853	P:L-ascorbic_acid_biosynthetic_process	6	5.91631e-08	Transcript_017754;Transcript_018092;Transcript_030432;Transcript_101286;Transcript_217542;Transcript_227392
GO:0001649	P:osteoblast_differentiation	6	0.268394	Transcript_020201;Transcript_151618;Transcript_194105;Transcript_220756;Transcript_229781;Transcript_242079
GO:0044262	P:cellular_carbohydrate_metabolic_process	6	0.0303608	Transcript_005683;Transcript_009468;Transcript_040630;Transcript_098869;Transcript_167707;Transcript_228215
GO:0003906	F:DNA-(apurinic_or_apyrimidinic_site)_lyase_activity	6	0.0655574	Transcript_082537;Transcript_093232;Transcript_149537;Transcript_168654;Transcript_186513;Transcript_242029
GO:0007283	P:spermatogenesis	6	2.40254e-05	Transcript_006542;Transcript_006758;Transcript_087162;Transcript_104492;Transcript_162607;Transcript_226188
GO:0004656	F:procollagen-proline_4-dioxygenase_activity	6	0.0311154	Transcript_110200;Transcript_145284;Transcript_161810;Transcript_165238;Transcript_187664;Transcript_201782
GO:0046274	P:lignin_catabolic_process	6	0.00114549	Transcript_054604;Transcript_086850;Transcript_099444;Transcript_155921;Transcript_176240;Transcript_235120
GO:0000790	C:nuclear_chromatin	6	0.00114549	Transcript_023823;Transcript_065669;Transcript_079006;Transcript_132402;Transcript_139660;Transcript_149849
GO:0052692	F:raffinose_alpha-galactosidase_activity	6	0.0105263	Transcript_001576;Transcript_113727;Transcript_128118;Transcript_150292;Transcript_204880;Transcript_223849
GO:0046470	P:phosphatidylcholine_metabolic_process	6	0.0508222	Transcript_004067;Transcript_023455;Transcript_031577;Transcript_159486;Transcript_229716;Transcript_241205
GO:0015996	P:chlorophyll_catabolic_process	6	0.170039	Transcript_000076;Transcript_034123;Transcript_042887;Transcript_094835;Transcript_099841;Transcript_221822
GO:0051403	P:stress-activated_MAPK_cascade	6	0.170039	Transcript_030486;Transcript_069251;Transcript_151330;Transcript_155512;Transcript_170156;Transcript_203093
GO:0033180	C:proton-transporting_V-type_ATPase,_V1_domain	6	0.00114549	Transcript_024398;Transcript_037065;Transcript_172831;Transcript_190353;Transcript_231595;Transcript_240650
GO:0009561	P:megagametogenesis	6	0.00622151	Transcript_036346;Transcript_143107;Transcript_169395;Transcript_187470;Transcript_203552;Transcript_226638
GO:0006278	P:RNA-dependent_DNA_replication	6	0.00114549	Transcript_025591;Transcript_032348;Transcript_045095;Transcript_149605;Transcript_164718;Transcript_229724
GO:0009443	P:pyridoxal_5'-phosphate_salvage	6	0.660684	Transcript_001997;Transcript_150349;Transcript_162588;Transcript_169792;Transcript_171561;Transcript_216341
ko05020	Prion_diseases	6	0.00264093	Transcript_003919;Transcript_023019;Transcript_047623;Transcript_151579;Transcript_199440;Transcript_208901
GO:0015254	F:glycerol_channel_activity	6	0.000146006	Transcript_005688;Transcript_025024;Transcript_046718;Transcript_078905;Transcript_166475;Transcript_175974
GO:0008353	F:RNA_polymerase_II_carboxy-terminal_domain_kinase_activity	6	3.83617e-06	Transcript_009578;Transcript_012151;Transcript_015339;Transcript_179708;Transcript_215354;Transcript_230973
GO:0010197	P:polar_nucleus_fusion	6	0.000469059	Transcript_021788;Transcript_038946;Transcript_158995;Transcript_159964;Transcript_190646;Transcript_225781
GO:0019310	P:inositol_catabolic_process	6	0.492543	Transcript_017754;Transcript_018092;Transcript_030432;Transcript_186481;Transcript_217542;Transcript_227392
GO:0016471	C:vacuolar_proton-transporting_V-type_ATPase_complex	6	0.0393139	Transcript_016602;Transcript_018319;Transcript_024398;Transcript_160320;Transcript_183515;Transcript_218023
GO:0000160	P:phosphorelay_signal_transduction_system	6	4.27311e-05	Transcript_003163;Transcript_014041;Transcript_192512;Transcript_202823;Transcript_211380;Transcript_211841
GO:0080044	F:quercetin_7-O-glucosyltransferase_activity	6	0.000631624	Transcript_011058;Transcript_195704;Transcript_195757;Transcript_205051;Transcript_207369;Transcript_244801
GO:0042631	P:cellular_response_to_water_deprivation	6	1.27528e-05	Transcript_009350;Transcript_043420;Transcript_112174;Transcript_135343;Transcript_203354;Transcript_227246
GO:0000723	P:telomere_maintenance	6	0.00800687	Transcript_013610;Transcript_030874;Transcript_041509;Transcript_100656;Transcript_191805;Transcript_233134
GO:0004622	F:lysophospholipase_activity	6	0.0035157	Transcript_045385;Transcript_050096;Transcript_074778;Transcript_147952;Transcript_187034;Transcript_202168
ko03460	Fanconi_anemia_pathway	6	2.28417e-09	Transcript_030179;Transcript_030567;Transcript_079313;Transcript_226697;Transcript_230389;Transcript_241339
GO:0009532	C:plastid_stroma	6	3.29995e-05	Transcript_021946;Transcript_025157;Transcript_047691;Transcript_060720;Transcript_100629;Transcript_209520
GO:0004579	F:dolichyl-diphosphooligosaccharide-protein_glycotransferase_activity	6	0.0508222	Transcript_015282;Transcript_065665;Transcript_157849;Transcript_192756;Transcript_219435;Transcript_229590
GO:0032922	P:circadian_regulation_of_gene_expression	6	0.0303608	Transcript_001079;Transcript_032795;Transcript_034685;Transcript_101040;Transcript_225156;Transcript_227716
GO:0009089	P:lysine_biosynthetic_process_via_diaminopimelate	6	3.14727e-05	Transcript_025090;Transcript_046799;Transcript_084053;Transcript_085588;Transcript_105969;Transcript_149364
GO:0000289	P:nuclear-transcribed_mRNA_poly(A)_tail_shortening	6	0.00198343	Transcript_043594;Transcript_053332;Transcript_146024;Transcript_155544;Transcript_222288;Transcript_227122
GO:0030014	C:CCR4-NOT_complex_	6	0.0082661	Transcript_053332;Transcript_146024;Transcript_155544;Transcript_183500;Transcript_222288;Transcript_227122
GO:0010105	P:negative_regulation_of_ethylene-activated_signaling_pathway	6	0.000270432	Transcript_046638;Transcript_091368;Transcript_192512;Transcript_202823;Transcript_210047;Transcript_211380
GO:0016458	P:gene_silencing	6	0.170039	Transcript_016829;Transcript_030179;Transcript_036517;Transcript_184279;Transcript_213248;Transcript_233011
GO:0009854	P:oxidative_photosynthetic_carbon_pathway	6	0.264553	Transcript_020798;Transcript_035652;Transcript_100833;Transcript_179003;Transcript_185018;Transcript_209355
GO:0071011	C:precatalytic_spliceosome	6	0.000107319	Transcript_014745;Transcript_035258;Transcript_069308;Transcript_200884;Transcript_213172;Transcript_244667
GO:0030036	P:actin_cytoskeleton_organization	6	7.59186e-07	Transcript_014745;Transcript_041536;Transcript_106950;Transcript_173514;Transcript_222325;Transcript_238919
GO:0045036	P:protein_targeting_to_chloroplast	6	0.105839	Transcript_017653;Transcript_026130;Transcript_026139;Transcript_033898;Transcript_041446;Transcript_175532
GO:0005771	C:multivesicular_body	6	0.0237843	Transcript_018886;Transcript_024907;Transcript_083038;Transcript_090283;Transcript_196613;Transcript_232583
GO:0006097	P:glyoxylate_cycle	6	0.00467835	Transcript_010583;Transcript_033792;Transcript_077772;Transcript_110269;Transcript_149630;Transcript_187708
GO:0006479	P:protein_methylation	6	0.0393139	Transcript_019467;Transcript_031559;Transcript_094348;Transcript_197498;Transcript_218022;Transcript_222867
ko00460	Cyanoamino_acid_metabolism	6	6.42057e-10	Transcript_017860;Transcript_044180;Transcript_044610;Transcript_047399;Transcript_151025;Transcript_234966
GO:0016070	P:RNA_metabolic_process	6	0.170039	Transcript_042932;Transcript_044789;Transcript_173665;Transcript_187470;Transcript_224762;Transcript_226638
GO:0048477	P:oogenesis	6	3.62104e-06	Transcript_035258;Transcript_036517;Transcript_042164;Transcript_069308;Transcript_087162;Transcript_233011
GO:0004521	F:endoribonuclease_activity	6	0.00622151	Transcript_023948;Transcript_024473;Transcript_031794;Transcript_168571;Transcript_237277;Transcript_244174
GO:0030126	C:COPI_vesicle_coat	6	0.000631624	Transcript_033836;Transcript_033978;Transcript_057999;Transcript_180639;Transcript_185769;Transcript_203894
ko00670	One_carbon_pool_by_folate	6	5.50323e-07	Transcript_028382;Transcript_047399;Transcript_202512;Transcript_216654;Transcript_228479;Transcript_231794
GO:0090305	P:nucleic_acid_phosphodiester_bond_hydrolysis	6	7.59186e-07	Transcript_044239;Transcript_053332;Transcript_146024;Transcript_155544;Transcript_156640;Transcript_225142
GO:0016310	P:phosphorylation	6	3.62104e-06	Transcript_014041;Transcript_024653;Transcript_034344;Transcript_111101;Transcript_173237;Transcript_240436
ko04330	Notch_signaling_pathway	6	0.000348418	Transcript_011139;Transcript_024392;Transcript_036517;Transcript_042195;Transcript_233011;Transcript_237083
GO:0050378	F:UDP-glucuronate_4-epimerase_activity	6	0.170039	Transcript_019848;Transcript_037115;Transcript_125168;Transcript_153137;Transcript_185395;Transcript_232638
GO:0005315	F:inorganic_phosphate_transmembrane_transporter_activity	6	0.000146006	Transcript_008627;Transcript_042504;Transcript_085884;Transcript_104049;Transcript_220512;Transcript_236686
GO:0051259	P:protein_oligomerization	6	0.405009	Transcript_015290;Transcript_133902;Transcript_153014;Transcript_187980;Transcript_203093;Transcript_237266
GO:0080043	F:quercetin_3-O-glucosyltransferase_activity	6	0.000631624	Transcript_011058;Transcript_195704;Transcript_195757;Transcript_205051;Transcript_207369;Transcript_244801
ko05100	Bacterial_invasion_of_epithelial_cells	6	3.24998e-10	Transcript_014860;Transcript_042857;Transcript_088161;Transcript_129988;Transcript_141684;Transcript_194999
GO:0010118	P:stomatal_movement	6	1.27528e-05	Transcript_001681;Transcript_016956;Transcript_033045;Transcript_043997;Transcript_135343;Transcript_152682
GO:0060548	P:negative_regulation_of_cell_death	6	0.00198343	Transcript_040863;Transcript_151294;Transcript_175505;Transcript_185260;Transcript_225156;Transcript_240649
GO:0009910	P:negative_regulation_of_flower_development	6	5.91631e-08	Transcript_006501;Transcript_031650;Transcript_041722;Transcript_044619;Transcript_167400;Transcript_224271
GO:0010629	P:negative_regulation_of_gene_expression	6	0.170039	Transcript_023489;Transcript_027642;Transcript_071500;Transcript_075913;Transcript_092054;Transcript_196697
ko05146	Amoebiasis	6	0.134388	Transcript_000872;Transcript_027419;Transcript_109160;Transcript_161256;Transcript_234723;Transcript_238705
GO:0004523	F:RNA-DNA_hybrid_ribonuclease_activity	6	0.000270432	Transcript_021829;Transcript_025591;Transcript_032348;Transcript_141042;Transcript_149605;Transcript_207128
GO:0000421	C:autophagosome_membrane_	6	0.00622151	Transcript_023362;Transcript_145838;Transcript_158394;Transcript_224557;Transcript_233045;Transcript_242610
GO:0008540	C:proteasome_regulatory_particle,_base_subcomplex	6	0.00207545	Transcript_016835;Transcript_026804;Transcript_129307;Transcript_153990;Transcript_174497;Transcript_208673
GO:0016773	F:phosphotransferase_activity,_alcohol_group_as_acceptor	6	0.00207545	Transcript_024653;Transcript_029681;Transcript_045079;Transcript_137434;Transcript_179460;Transcript_240598
ko00625	Chloroalkane_and_chloroalkene_degradation	6	2.89917e-07	Transcript_007351;Transcript_049193;Transcript_198319;Transcript_206114;Transcript_212121;Transcript_227823
ko04214	Apoptosis_-_fly	6	1.27528e-05	Transcript_047623;Transcript_155970;Transcript_199440;Transcript_211553;Transcript_222659;Transcript_233284
GO:0052716	F:hydroquinone:oxygen_oxidoreductase_activity	6	0.00114549	Transcript_054604;Transcript_086850;Transcript_099444;Transcript_155921;Transcript_176240;Transcript_235120
ko00604	Glycosphingolipid_biosynthesis_-_ganglio_series	6	0.214204	Transcript_008082;Transcript_014047;Transcript_021879;Transcript_042164;Transcript_175406;Transcript_186964
GO:0030515	F:snoRNA_binding	6	0.000198694	Transcript_038940;Transcript_100674;Transcript_159964;Transcript_190646;Transcript_234329;Transcript_244120
GO:0034314	P:Arp2/3_complex-mediated_actin_nucleation	5	0.0034231	Transcript_086303;Transcript_129988;Transcript_194999;Transcript_211219;Transcript_238919
GO:0006612	P:protein_targeting_to_membrane	5	2.64558e-05	Transcript_001711;Transcript_065706;Transcript_196849;Transcript_212752;Transcript_242829
GO:0015786	P:UDP-glucose_transport	5	0.0707412	Transcript_018389;Transcript_042755;Transcript_188243;Transcript_193534;Transcript_206282
GO:0008324	F:cation_transmembrane_transporter_activity	5	0.024799	Transcript_007167;Transcript_012407;Transcript_016549;Transcript_018010;Transcript_042614
GO:0000776	C:kinetochore	5	0.0414036	Transcript_057704;Transcript_108137;Transcript_150963;Transcript_177955;Transcript_235339
GO:0032543	P:mitochondrial_translation	5	6.91479e-05	Transcript_019412;Transcript_033717;Transcript_042306;Transcript_152038;Transcript_209973
GO:0033512	P:L-lysine_catabolic_process_to_acetyl-CoA_via_saccharopine	5	0.0240475	Transcript_007527;Transcript_031909;Transcript_043833;Transcript_072536;Transcript_160061
GO:0004525	F:ribonuclease_III_activity	5	0.00621683	Transcript_012222;Transcript_042738;Transcript_102338;Transcript_159420;Transcript_178073
ko00290	Valine,_leucine_and_isoleucine_biosynthesis	5	0.0105641	Transcript_005196;Transcript_053135;Transcript_103284;Transcript_211082;Transcript_233913
ko03450	Non-homologous_end-joining	5	0.697102	Transcript_013610;Transcript_027829;Transcript_041509;Transcript_196258;Transcript_233134
GO:0005700	C:polytene_chromosome	5	0.300289	Transcript_016829;Transcript_036517;Transcript_209767;Transcript_229005;Transcript_233011
GO:0000781	C:chromosome,_telomeric_region_	5	0.0140587	Transcript_023823;Transcript_099411;Transcript_100656;Transcript_167765;Transcript_235339
GO:0045263	C:proton-transporting_ATP_synthase_complex,_coupling_factor_F(o)	5	0.000585072	Transcript_015653;Transcript_080346;Transcript_148330;Transcript_174874;Transcript_211190
GO:0009165	P:nucleotide_biosynthetic_process	5	0.0186868	Transcript_007545;Transcript_037427;Transcript_042232;Transcript_165366;Transcript_174697
GO:0010087	P:phloem_or_xylem_histogenesis	5	8.12942e-08	Transcript_029215;Transcript_033497;Transcript_112168;Transcript_192512;Transcript_218673
ko00591	Linoleic_acid_metabolism	5	0.00188056	Transcript_015276;Transcript_035505;Transcript_088168;Transcript_102735;Transcript_226282
GO:0000815	C:ESCRT_III_complex_	5	0.000428679	Transcript_083038;Transcript_111054;Transcript_126621;Transcript_170293;Transcript_232583
ko00908	Zeatin_biosynthesis	5	0.0898724	Transcript_017700;Transcript_183649;Transcript_184819;Transcript_216128;Transcript_237856
ko04621	NOD-like_receptor_signaling_pathway	5	0.000314124	Transcript_015701;Transcript_023790;Transcript_047623;Transcript_130943;Transcript_199440
GO:0051707	P:response_to_other_organism	5	0.00103257	Transcript_138452;Transcript_151175;Transcript_191620;Transcript_194222;Transcript_207404
GO:0004322	F:ferroxidase_activity	5	0.148694	Transcript_008712;Transcript_052435;Transcript_167564;Transcript_236080;Transcript_238709
GO:0030553	F:cGMP_binding	5	0.000798487	Transcript_017464;Transcript_022515;Transcript_169578;Transcript_192811;Transcript_213359
GO:0008374	F:O-acyltransferase_activity	5	0.0240475	Transcript_094733;Transcript_177019;Transcript_186738;Transcript_204842;Transcript_231645
GO:0000254	F:C-4_methylsterol_oxidase_activity	5	0.190188	Transcript_024414;Transcript_026535;Transcript_052099;Transcript_165687;Transcript_242410
GO:0009538	C:photosystem_I_reaction_center	5	0.024799	Transcript_007269;Transcript_016676;Transcript_020208;Transcript_189820;Transcript_230506
GO:0009267	P:cellular_response_to_starvation	5	0.0240475	Transcript_035258;Transcript_040561;Transcript_069308;Transcript_188900;Transcript_223871
GO:0034047	P:regulation_of_protein_phosphatase_type_2A_activity	5	0.242031	Transcript_004120;Transcript_005547;Transcript_043946;Transcript_095402;Transcript_241737
ko04662	B_cell_receptor_signaling_pathway	5	2.92323e-10	Transcript_042857;Transcript_047623;Transcript_141684;Transcript_199440;Transcript_227948
GO:0019003	F:GDP_binding	5	0.238385	Transcript_051617;Transcript_089339;Transcript_109160;Transcript_161256;Transcript_190714
GO:0005844	C:polysome	5	0.000314124	Transcript_018247;Transcript_056708;Transcript_098798;Transcript_132425;Transcript_211140
GO:0006556	P:S-adenosylmethionine_biosynthetic_process	5	0.024799	Transcript_030648;Transcript_089051;Transcript_137937;Transcript_193052;Transcript_202210
GO:0015867	P:ATP_transport	5	0.00621683	Transcript_011381;Transcript_029830;Transcript_045165;Transcript_090184;Transcript_233863
GO:0006826	P:iron_ion_transport	5	0.0898724	Transcript_008712;Transcript_052435;Transcript_167564;Transcript_236080;Transcript_238709
GO:0009958	P:positive_gravitropism	5	1.3982e-05	Transcript_002237;Transcript_012490;Transcript_094276;Transcript_225665;Transcript_236713
GO:0031593	F:polyubiquitin_binding	5	0.000123832	Transcript_017909;Transcript_021459;Transcript_031964;Transcript_044265;Transcript_102238
GO:0000045	P:autophagosome_assembly	5	4.50965e-08	Transcript_083601;Transcript_103059;Transcript_145838;Transcript_224557;Transcript_242610
GO:0007131	P:reciprocal_meiotic_recombination	5	0.000230238	Transcript_131580;Transcript_155998;Transcript_179685;Transcript_222659;Transcript_230959
GO:0006520	P:cellular_amino_acid_metabolic_process	5	3.08292e-07	Transcript_032437;Transcript_130536;Transcript_131665;Transcript_161218;Transcript_220510
ko04370	VEGF_signaling_pathway	5	1.47619e-10	Transcript_042857;Transcript_047623;Transcript_141684;Transcript_199440;Transcript_227948
GO:0016571	P:histone_methylation	5	0.00188056	Transcript_044619;Transcript_153520;Transcript_220474;Transcript_229005;Transcript_242922
GO:2000024	P:regulation_of_leaf_development	5	1.0906e-06	Transcript_011563;Transcript_034176;Transcript_079178;Transcript_158529;Transcript_205797
GO:0002039	F:p53_binding	5	0.0240475	Transcript_053673;Transcript_158397;Transcript_186094;Transcript_188612;Transcript_195756
GO:0019761	P:glucosinolate_biosynthetic_process	5	0.00595118	Transcript_020969;Transcript_026698;Transcript_031557;Transcript_065706;Transcript_222677
GO:0017148	P:negative_regulation_of_translation	5	0.00139346	Transcript_004120;Transcript_009321;Transcript_017864;Transcript_043672;Transcript_098798
GO:0010260	P:organ_senescence	5	0.0105641	Transcript_059679;Transcript_082012;Transcript_082797;Transcript_202132;Transcript_216217
GO:0008219	P:cell_death	5	5.59594e-06	Transcript_003510;Transcript_040863;Transcript_046373;Transcript_061028;Transcript_222945
GO:0007126	P:meiotic_nuclear_division	5	0.190188	Transcript_015088;Transcript_025477;Transcript_035131;Transcript_204204;Transcript_230389
GO:0019104	F:DNA_N-glycosylase_activity	5	0.242031	Transcript_082537;Transcript_093232;Transcript_111551;Transcript_144874;Transcript_168654
GO:0008047	F:enzyme_activator_activity	5	0.0898724	Transcript_006334;Transcript_037644;Transcript_201007;Transcript_216965;Transcript_234662
GO:0004743	F:pyruvate_kinase_activity	5	0.000798487	Transcript_005220;Transcript_006512;Transcript_015664;Transcript_037817;Transcript_043127
GO:0009616	P:virus_induced_gene_silencing	5	0.0414036	Transcript_033998;Transcript_042738;Transcript_160851;Transcript_178073;Transcript_222659
GO:0008889	F:glycerophosphodiester_phosphodiesterase_activity	5	0.00793126	Transcript_023146;Transcript_029762;Transcript_031349;Transcript_059666;Transcript_236167
ko00300	Lysine_biosynthesis	5	2.64558e-05	Transcript_025090;Transcript_046799;Transcript_085588;Transcript_105969;Transcript_206222
GO:0003950	F:NAD+_ADP-ribosyltransferase_activity	5	0.024799	Transcript_007373;Transcript_042074;Transcript_154251;Transcript_187926;Transcript_222659
ko04650	Natural_killer_cell_mediated_cytotoxicity	5	2.98741e-09	Transcript_042857;Transcript_047623;Transcript_141684;Transcript_199440;Transcript_227948
GO:0030544	F:Hsp70_protein_binding	5	0.467748	Transcript_007908;Transcript_019467;Transcript_044265;Transcript_094348;Transcript_222867
GO:0004563	F:beta-N-acetylhexosaminidase_activity	5	0.57164	Transcript_008082;Transcript_021879;Transcript_042164;Transcript_175406;Transcript_186964
GO:0045184	P:establishment_of_protein_localization	5	0.242031	Transcript_031964;Transcript_057704;Transcript_177955;Transcript_223248;Transcript_227772
GO:0007281	P:germ_cell_development	5	0.190188	Transcript_098798;Transcript_099676;Transcript_113060;Transcript_223871;Transcript_233284
GO:0006048	P:UDP-N-acetylglucosamine_biosynthetic_process	5	0.467748	Transcript_027302;Transcript_034685;Transcript_070065;Transcript_123161;Transcript_186471
GO:0019904	F:protein_domain_specific_binding	5	0.024799	Transcript_003919;Transcript_031964;Transcript_223248;Transcript_225156;Transcript_227772
GO:0016485	P:protein_processing	5	1.1528e-08	Transcript_029180;Transcript_035958;Transcript_085015;Transcript_133304;Transcript_201678
GO:0031490	F:chromatin_DNA_binding	5	0.81178	Transcript_021469;Transcript_022788;Transcript_139660;Transcript_170790;Transcript_214469
GO:0035264	P:multicellular_organism_growth	5	0.57164	Transcript_036696;Transcript_040271;Transcript_058742;Transcript_158761;Transcript_158996
GO:0051536	F:iron-sulfur_cluster_binding	5	4.18137e-09	Transcript_019591;Transcript_059207;Transcript_199905;Transcript_206393;Transcript_222418
GO:0007568	P:aging	5	0.0034231	Transcript_011643;Transcript_031559;Transcript_032853;Transcript_052823;Transcript_240649
GO:0004365	F:glyceraldehyde-3-phosphate_dehydrogenase_(NAD+)_(phosphorylating)_activity	5	0.0034231	Transcript_030924;Transcript_151402;Transcript_189852;Transcript_220463;Transcript_222948
ko05212	Pancreatic_cancer	5	2.27647e-08	Transcript_042857;Transcript_047623;Transcript_141684;Transcript_199440;Transcript_226697
GO:0009116	P:nucleoside_metabolic_process	5	0.0105641	Transcript_007545;Transcript_037427;Transcript_042232;Transcript_165366;Transcript_189646
GO:0012501	P:programmed_cell_death	5	0.000798487	Transcript_031577;Transcript_093012;Transcript_186885;Transcript_187936;Transcript_229716
GO:0042732	P:D-xylose_metabolic_process	5	0.0034231	Transcript_017046;Transcript_043198;Transcript_075566;Transcript_167162;Transcript_242467
GO:0009098	P:leucine_biosynthetic_process	5	0.0034231	Transcript_005196;Transcript_011576;Transcript_053135;Transcript_103284;Transcript_233913
GO:0048443	P:stamen_development	5	0.000428679	Transcript_009778;Transcript_159015;Transcript_209799;Transcript_225665;Transcript_236713
GO:0010050	P:vegetative_phase_change	5	0.000428679	Transcript_042738;Transcript_098667;Transcript_178073;Transcript_216217;Transcript_225964
GO:0019076	P:viral_release_from_host_cell	5	0.024799	Transcript_025591;Transcript_032348;Transcript_109160;Transcript_149605;Transcript_223248
GO:0007399	P:nervous_system_development	5	0.0541861	Transcript_002541;Transcript_004788;Transcript_085412;Transcript_214162;Transcript_240599
GO:0051131	P:chaperone-mediated_protein_complex_assembly	5	0.000765285	Transcript_151579;Transcript_234409;Transcript_235061;Transcript_242567;Transcript_244062
GO:0003995	F:acyl-CoA_dehydrogenase_activity	5	0.0414036	Transcript_072738;Transcript_095194;Transcript_176842;Transcript_184559;Transcript_186076
GO:0048481	P:ovule_development	5	9.62176e-13	Transcript_047623;Transcript_197054;Transcript_222241;Transcript_225109;Transcript_244715
GO:0010098	P:suspensor_development	5	0.697102	Transcript_030486;Transcript_069251;Transcript_151330;Transcript_155512;Transcript_242916
GO:0004518	F:nuclease_activity	5	2.64558e-05	Transcript_028833;Transcript_043191;Transcript_088363;Transcript_137080;Transcript_235627
GO:0043065	P:positive_regulation_of_apoptotic_process	5	0.00188056	Transcript_005547;Transcript_015286;Transcript_189510;Transcript_203093;Transcript_210373
GO:0052325	P:cell_wall_pectin_biosynthetic_process	5	0.115784	Transcript_002525;Transcript_023111;Transcript_225459;Transcript_225867;Transcript_232859
GO:0042820	P:vitamin_B6_catabolic_process	5	0.447193	Transcript_001997;Transcript_150349;Transcript_162588;Transcript_169792;Transcript_216341
GO:0010628	P:positive_regulation_of_gene_expression	5	2.64558e-05	Transcript_004752;Transcript_049193;Transcript_088645;Transcript_166227;Transcript_225156
GO:0008199	F:ferric_iron_binding	5	0.0240475	Transcript_008712;Transcript_052435;Transcript_167564;Transcript_236080;Transcript_238709
GO:0006275	P:regulation_of_DNA_replication	5	0.0315765	Transcript_009593;Transcript_014919;Transcript_040009;Transcript_177527;Transcript_222659
GO:0004402	F:histone_acetyltransferase_activity	5	2.20649e-07	Transcript_024392;Transcript_031675;Transcript_042195;Transcript_237083;Transcript_240717
ko00430	Taurine_and_hypotaurine_metabolism	5	0.0707412	Transcript_009755;Transcript_030423;Transcript_155852;Transcript_162305;Transcript_197658
GO:0090430	F:caffeoyl-CoA:_alcohol_caffeoyl_transferase_activity	5	0.00595118	Transcript_045385;Transcript_074778;Transcript_147952;Transcript_187034;Transcript_202168
GO:0045735	F:nutrient_reservoir_activity	5	1.3982e-05	Transcript_075688;Transcript_170640;Transcript_196731;Transcript_218023;Transcript_237266
GO:0030071	P:regulation_of_mitotic_metaphase/anaphase_transition	5	0.0707412	Transcript_006688;Transcript_033497;Transcript_044220;Transcript_057704;Transcript_177955
GO:0009311	P:oligosaccharide_metabolic_process	5	1	Transcript_010309;Transcript_047430;Transcript_150750;Transcript_172146;Transcript_204880
GO:0008271	F:secondary_active_sulfate_transmembrane_transporter_activity	5	0.024799	Transcript_008034;Transcript_008298;Transcript_044324;Transcript_186645;Transcript_242750
GO:0031347	P:regulation_of_defense_response	5	2.64558e-05	Transcript_006688;Transcript_007164;Transcript_044178;Transcript_050781;Transcript_200447
ko05220	Chronic_myeloid_leukemia	5	1.92266e-05	Transcript_011139;Transcript_036517;Transcript_047623;Transcript_199440;Transcript_233011
GO:0048359	P:mucilage_metabolic_process_involved_in_seed_coat_development	5	0.000123832	Transcript_014313;Transcript_032760;Transcript_042324;Transcript_187465;Transcript_205797
GO:0007010	P:cytoskeleton_organization	5	0.000798487	Transcript_006722;Transcript_028554;Transcript_032610;Transcript_088161;Transcript_238919
GO:0008295	P:spermidine_biosynthetic_process	5	0.000168814	Transcript_008965;Transcript_013490;Transcript_095565;Transcript_173352;Transcript_231291
GO:0003846	F:2-acylglycerol_O-acyltransferase_activity	5	0.00595118	Transcript_045385;Transcript_074778;Transcript_147952;Transcript_187034;Transcript_202168
GO:0009840	C:chloroplastic_endopeptidase_Clp_complex	5	0.0186868	Transcript_021946;Transcript_025157;Transcript_047691;Transcript_100629;Transcript_209520
GO:0000422	P:mitochondrion_degradation	5	5.01756e-05	Transcript_083601;Transcript_103059;Transcript_110129;Transcript_145838;Transcript_224557
GO:0008061	F:chitin_binding	5	2.64558e-05	Transcript_006062;Transcript_156074;Transcript_161508;Transcript_204757;Transcript_209425
GO:0006836	P:neurotransmitter_transport	5	0.621661	Transcript_011643;Transcript_023500;Transcript_027093;Transcript_038170;Transcript_153016
GO:0031359	C:integral_component_of_chloroplast_outer_membrane	5	0.148694	Transcript_061583;Transcript_154795;Transcript_157270;Transcript_200823;Transcript_215454
GO:0001676	P:long-chain_fatty_acid_metabolic_process	5	0.0707412	Transcript_015934;Transcript_028424;Transcript_169987;Transcript_176842;Transcript_192500
GO:0040007	P:growth	5	0.00103257	Transcript_014357;Transcript_019100;Transcript_028467;Transcript_173237;Transcript_198729
GO:0001578	P:microtubule_bundle_formation	5	0.148694	Transcript_084439;Transcript_089102;Transcript_209023;Transcript_222411;Transcript_227945
GO:0004362	F:glutathione-disulfide_reductase_activity	5	0.242031	Transcript_008733;Transcript_014164;Transcript_042016;Transcript_215115;Transcript_235577
GO:0004473	F:malate_dehydrogenase_(decarboxylating)_(NADP+)_activity	5	0.0186868	Transcript_018852;Transcript_081537;Transcript_153108;Transcript_217483;Transcript_243672
GO:0008559	F:xenobiotic-transporting_ATPase_activity	5	0.000765285	Transcript_001681;Transcript_019570;Transcript_042725;Transcript_138562;Transcript_239363
GO:0042995	C:cell_projection_	5	0.0414036	Transcript_126589;Transcript_129988;Transcript_194999;Transcript_211219;Transcript_229281
GO:0043025	C:neuronal_cell_body	5	6.03171e-07	Transcript_015934;Transcript_087162;Transcript_200794;Transcript_225156;Transcript_230817
GO:0009501	C:amyloplast_	5	8.21403e-09	Transcript_029928;Transcript_041688;Transcript_149454;Transcript_222892;Transcript_242096
GO:0009266	P:response_to_temperature_stimulus	5	0.00461501	Transcript_015927;Transcript_050781;Transcript_053375;Transcript_056822;Transcript_071807
GO:0003724	F:RNA_helicase_activity	5	0.0186868	Transcript_044789;Transcript_160851;Transcript_165027;Transcript_200884;Transcript_209767
GO:0043981	P:histone_H4-K5_acetylation	5	0.115784	Transcript_044732;Transcript_162985;Transcript_173944;Transcript_175659;Transcript_225156
GO:0000162	P:tryptophan_biosynthetic_process	5	0.000428679	Transcript_002884;Transcript_028573;Transcript_033546;Transcript_196529;Transcript_198376
ko04916	Melanogenesis	5	3.64245e-05	Transcript_024392;Transcript_042195;Transcript_047623;Transcript_199440;Transcript_237083
GO:0009817	P:defense_response_to_fungus,_incompatible_interaction	5	0.00139346	Transcript_040857;Transcript_050482;Transcript_169756;Transcript_239858;Transcript_243318
GO:0044732	C:mitotic_spindle_pole_body_	5	0.000798487	Transcript_015088;Transcript_035055;Transcript_035428;Transcript_163135;Transcript_209850
GO:0046034	P:ATP_metabolic_process	5	3.64245e-05	Transcript_020201;Transcript_024398;Transcript_158996;Transcript_190353;Transcript_231595
GO:0043622	P:cortical_microtubule_organization	5	1.92266e-05	Transcript_037116;Transcript_042567;Transcript_170156;Transcript_194933;Transcript_232493
GO:0016161	F:beta-amylase_activity	5	0.0541861	Transcript_009682;Transcript_101852;Transcript_104203;Transcript_136362;Transcript_162504
GO:0005544	F:calcium-dependent_phospholipid_binding	5	4.3107e-07	Transcript_018358;Transcript_093059;Transcript_163172;Transcript_192239;Transcript_242829
ko04015	Rap1_signaling_pathway	5	5.73851e-11	Transcript_042857;Transcript_047623;Transcript_088161;Transcript_141684;Transcript_199440
ko05033	Nicotine_addiction	5	1	Transcript_011643;Transcript_027093;Transcript_038170;Transcript_153016;Transcript_198712
GO:0030001	P:metal_ion_transport	5	6.03171e-07	Transcript_122683;Transcript_196634;Transcript_201827;Transcript_226085;Transcript_232040
GO:0031463	C:Cul3-RING_ubiquitin_ligase_complex_	5	0.300289	Transcript_007808;Transcript_031110;Transcript_112850;Transcript_174453;Transcript_214887
GO:0050113	F:inositol_oxygenase_activity	5	0.376128	Transcript_017754;Transcript_018092;Transcript_030432;Transcript_217542;Transcript_227392
GO:0008180	C:COP9_signalosome_	5	5.01756e-05	Transcript_003919;Transcript_073836;Transcript_096112;Transcript_099676;Transcript_108137
GO:0009690	P:cytokinin_metabolic_process	5	0.0105641	Transcript_009827;Transcript_034973;Transcript_178825;Transcript_183649;Transcript_241790
GO:0051213	F:dioxygenase_activity	5	5.01756e-05	Transcript_006542;Transcript_044810;Transcript_167400;Transcript_197324;Transcript_204500
ko04730	Long-term_depression	5	0.00253761	Transcript_015425;Transcript_047623;Transcript_079199;Transcript_169578;Transcript_199440
GO:0005686	C:U2_snRNP	5	0.0140587	Transcript_189117;Transcript_205480;Transcript_237032;Transcript_241198;Transcript_244667
GO:0007080	P:mitotic_metaphase_plate_congression	5	0.190188	Transcript_057704;Transcript_111054;Transcript_177955;Transcript_232924;Transcript_235339
GO:0045271	C:respiratory_chain_complex_I	5	0.00793126	Transcript_020282;Transcript_044397;Transcript_196980;Transcript_222418;Transcript_236702
GO:0033539	P:fatty_acid_beta-oxidation_using_acyl-CoA_dehydrogenase	5	0.0707412	Transcript_072738;Transcript_095194;Transcript_176842;Transcript_184559;Transcript_186076
GO:0003727	F:single-stranded_RNA_binding	5	9.53251e-05	Transcript_001067;Transcript_004956;Transcript_009033;Transcript_027868;Transcript_132425
GO:0004683	F:calmodulin-dependent_protein_kinase_activity	5	5.85789e-09	Transcript_021004;Transcript_046627;Transcript_083718;Transcript_173863;Transcript_210373
GO:0006102	P:isocitrate_metabolic_process	5	0.115784	Transcript_044843;Transcript_110053;Transcript_185040;Transcript_187708;Transcript_203431
GO:0004478	F:methionine_adenosyltransferase_activity	5	0.0240475	Transcript_030648;Transcript_089051;Transcript_137937;Transcript_193052;Transcript_202210
GO:0030425	C:dendrite_	5	0.00461501	Transcript_007908;Transcript_011643;Transcript_019177;Transcript_127726;Transcript_230817
GO:0006949	P:syncytium_formation	5	0.024799	Transcript_012209;Transcript_017797;Transcript_021866;Transcript_208347;Transcript_223794
GO:0008021	C:synaptic_vesicle	5	0.376128	Transcript_011643;Transcript_023500;Transcript_027093;Transcript_036750;Transcript_089339
GO:0006644	P:phospholipid_metabolic_process	5	0.0034231	Transcript_034742;Transcript_042453;Transcript_135001;Transcript_164814;Transcript_234081
GO:0015804	P:neutral_amino_acid_transport	5	0.242031	Transcript_016186;Transcript_035838;Transcript_051885;Transcript_183390;Transcript_198712
GO:0046856	P:phosphatidylinositol_dephosphorylation	5	0.00621683	Transcript_015628;Transcript_022105;Transcript_093409;Transcript_160203;Transcript_242230
GO:0016281	C:eukaryotic_translation_initiation_factor_4F_complex_	5	1	Transcript_043594;Transcript_043672;Transcript_173665;Transcript_209163;Transcript_243390
GO:0048653	P:anther_development	5	0.0034231	Transcript_169232;Transcript_207832;Transcript_223762;Transcript_228251;Transcript_239601
GO:0016621	F:cinnamoyl-CoA_reductase_activity_	5	0.115784	Transcript_026071;Transcript_034417;Transcript_191388;Transcript_208346;Transcript_237281
GO:0022624	C:proteasome_accessory_complex	5	0.0034231	Transcript_009434;Transcript_071966;Transcript_153990;Transcript_165401;Transcript_226137
GO:0006536	P:glutamate_metabolic_process	5	0.0541861	Transcript_049636;Transcript_155852;Transcript_162305;Transcript_197658;Transcript_222892
GO:0010143	P:cutin_biosynthetic_process	5	0.000230238	Transcript_072463;Transcript_103216;Transcript_169987;Transcript_197819;Transcript_232327
GO:0007520	P:myoblast_fusion	5	0.0315765	Transcript_006512;Transcript_015664;Transcript_030990;Transcript_225114;Transcript_238919
GO:0044257	P:cellular_protein_catabolic_process	5	0.148694	Transcript_016705;Transcript_117260;Transcript_174453;Transcript_241709;Transcript_241809
GO:0008948	F:oxaloacetate_decarboxylase_activity	5	0.00253761	Transcript_018852;Transcript_081537;Transcript_153108;Transcript_217483;Transcript_243672
GO:0009657	P:plastid_organization	5	0.0315765	Transcript_001711;Transcript_025627;Transcript_027868;Transcript_042519;Transcript_045193
GO:0000148	C:1,3-beta-D-glucan_synthase_complex_	5	0.000798487	Transcript_004937;Transcript_007513;Transcript_013605;Transcript_186273;Transcript_203408
GO:0009927	F:histidine_phosphotransfer_kinase_activity	5	0.0186868	Transcript_014041;Transcript_037488;Transcript_192512;Transcript_202823;Transcript_211380
GO:0016579	P:protein_deubiquitination	5	5.85789e-09	Transcript_029670;Transcript_030639;Transcript_084750;Transcript_163873;Transcript_233080
GO:0001522	P:pseudouridine_synthesis	5	0.00461501	Transcript_152398;Transcript_159964;Transcript_190646;Transcript_200390;Transcript_223871
GO:0004029	F:aldehyde_dehydrogenase_(NAD)_activity	5	1.58048e-07	Transcript_104035;Transcript_170743;Transcript_206114;Transcript_212121;Transcript_233238
GO:0048037	F:cofactor_binding	5	0.0240475	Transcript_015290;Transcript_098869;Transcript_104492;Transcript_167707;Transcript_216692
GO:0009749	P:response_to_glucose	5	1.3982e-05	Transcript_038190;Transcript_042756;Transcript_104049;Transcript_188805;Transcript_229743
GO:0052890	F:oxidoreductase_activity,_acting_on_the_CH-CH_group_of_donors,_with_a_flavin_as_acceptor	5	0.0920682	Transcript_072738;Transcript_095194;Transcript_176842;Transcript_184559;Transcript_186076
GO:0004181	F:metallocarboxypeptidase_activity	5	0.00793126	Transcript_150822;Transcript_151747;Transcript_164508;Transcript_186590;Transcript_243025
GO:0005460	F:UDP-glucose_transmembrane_transporter_activity	5	0.0707412	Transcript_018389;Transcript_042755;Transcript_188243;Transcript_193534;Transcript_206282
GO:0009117	P:nucleotide_metabolic_process	5	0.148694	Transcript_065706;Transcript_070575;Transcript_158442;Transcript_184971;Transcript_222925
GO:0009704	P:de-etiolation	5	0.0898724	Transcript_039277;Transcript_158589;Transcript_187225;Transcript_195229;Transcript_228726
GO:0005496	F:steroid_binding	5	0.0105641	Transcript_017667;Transcript_021523;Transcript_030099;Transcript_096510;Transcript_199900
ko04664	Fc_epsilon_RI_signaling_pathway	5	6.03171e-07	Transcript_042857;Transcript_047623;Transcript_141684;Transcript_156614;Transcript_199440
GO:0000188	P:inactivation_of_MAPK_activity	5	0.821906	Transcript_009742;Transcript_200917;Transcript_211939;Transcript_227209;Transcript_228277
GO:0031098	P:stress-activated_protein_kinase_signaling_cascade	5	0.190188	Transcript_014297;Transcript_086608;Transcript_168093;Transcript_236927;Transcript_238155
GO:0050790	P:regulation_of_catalytic_activity	5	0.000585072	Transcript_001387;Transcript_006096;Transcript_018911;Transcript_163680;Transcript_222250
GO:0015914	P:phospholipid_transport	5	0.0105641	Transcript_024543;Transcript_061651;Transcript_149307;Transcript_159378;Transcript_170658
ko03430	Mismatch_repair	5	1.1528e-08	Transcript_019818;Transcript_030179;Transcript_186407;Transcript_224812;Transcript_238953
ko04712	Circadian_rhythm_-_plant	5	1.0906e-06	Transcript_041388;Transcript_113812;Transcript_188900;Transcript_211841;Transcript_228200
GO:0043488	P:regulation_of_mRNA_stability	5	0.0707412	Transcript_017353;Transcript_019691;Transcript_148611;Transcript_154329;Transcript_172064
GO:0006075	P:(1->3)-beta-D-glucan_biosynthetic_process	5	0.000798487	Transcript_004937;Transcript_007513;Transcript_013605;Transcript_186273;Transcript_203408
GO:0035999	P:tetrahydrofolate_interconversion	5	8.4453e-07	Transcript_008657;Transcript_047399;Transcript_194608;Transcript_223384;Transcript_231794
GO:0005528	F:FK506_binding	5	0.0140587	Transcript_057334;Transcript_060767;Transcript_168472;Transcript_210758;Transcript_212264
GO:0071897	P:DNA_biosynthetic_process	5	1.01751e-05	Transcript_025591;Transcript_032348;Transcript_043968;Transcript_045095;Transcript_149605
GO:0042821	P:pyridoxal_biosynthetic_process	5	0.447193	Transcript_001997;Transcript_150349;Transcript_162588;Transcript_169792;Transcript_216341
GO:0006782	P:protoporphyrinogen_IX_biosynthetic_process	5	6.91479e-05	Transcript_006683;Transcript_006815;Transcript_011583;Transcript_035659;Transcript_129896
GO:0009850	P:auxin_metabolic_process	5	0.0105641	Transcript_009827;Transcript_034973;Transcript_048996;Transcript_178825;Transcript_241790
GO:0019887	F:protein_kinase_regulator_activity	5	0.000428679	Transcript_023931;Transcript_024426;Transcript_033853;Transcript_049225;Transcript_188900
ko05133	Pertussis	5	1.01751e-05	Transcript_032864;Transcript_047623;Transcript_088340;Transcript_190112;Transcript_199440
GO:0090351	P:seedling_development	5	0.576485	Transcript_011381;Transcript_014566;Transcript_029830;Transcript_043347;Transcript_227496
GO:0004096	F:catalase_activity	5	1	Transcript_005882;Transcript_012770;Transcript_052823;Transcript_174195;Transcript_187487
GO:0080148	P:negative_regulation_of_response_to_water_deprivation	5	0.00595118	Transcript_009827;Transcript_031158;Transcript_034973;Transcript_178825;Transcript_241790
GO:0005885	C:Arp2/3_protein_complex_	5	0.0034231	Transcript_086303;Transcript_129988;Transcript_194999;Transcript_211219;Transcript_238919
GO:0030955	F:potassium_ion_binding	5	0.000585072	Transcript_005220;Transcript_006512;Transcript_015664;Transcript_037817;Transcript_043127
GO:0004467	F:long-chain_fatty_acid-CoA_ligase_activity	5	0.0034231	Transcript_015934;Transcript_028424;Transcript_169987;Transcript_192500;Transcript_232327
GO:0048765	P:root_hair_cell_differentiation	5	0.000428679	Transcript_005429;Transcript_005776;Transcript_015752;Transcript_106409;Transcript_236167
GO:0045486	F:naringenin_3-dioxygenase_activity	5	0.0898724	Transcript_014375;Transcript_033024;Transcript_042760;Transcript_128369;Transcript_237341
GO:0004315	F:3-oxoacyl-acyl-carrier-protein_synthase_activity	5	0.00103257	Transcript_010061;Transcript_156072;Transcript_165162;Transcript_228819;Transcript_242079
GO:0006833	P:water_transport	5	0.000168814	Transcript_005688;Transcript_025024;Transcript_046718;Transcript_166475;Transcript_175974
GO:0000079	P:regulation_of_cyclin-dependent_protein_serine/threonine_kinase_activity	5	6.03171e-07	Transcript_016024;Transcript_087812;Transcript_192573;Transcript_195854;Transcript_226445
GO:0006955	P:immune_response	5	0.00139346	Transcript_003510;Transcript_014357;Transcript_028467;Transcript_053117;Transcript_232110
GO:0003843	F:1,3-beta-D-glucan_synthase_activity	5	0.000798487	Transcript_004937;Transcript_007513;Transcript_013605;Transcript_186273;Transcript_203408
GO:0019344	P:cysteine_biosynthetic_process	5	0.0034231	Transcript_035659;Transcript_142719;Transcript_231485;Transcript_234463;Transcript_243537
GO:0016477	P:cell_migration	5	0.840749	Transcript_008058;Transcript_018408;Transcript_020539;Transcript_126578;Transcript_242230
GO:0004332	F:fructose-bisphosphate_aldolase_activity	5	0.0240475	Transcript_018771;Transcript_027666;Transcript_046002;Transcript_090309;Transcript_209140
GO:0016829	F:lyase_activity	5	5.59594e-06	Transcript_005683;Transcript_015290;Transcript_038975;Transcript_090030;Transcript_172013
GO:0006465	P:signal_peptide_processing	5	0.000765285	Transcript_000240;Transcript_025335;Transcript_044131;Transcript_068703;Transcript_185790
GO:0032041	F:NAD-dependent_histone_deacetylase_activity_(H3-K14_specific)	5	0.00595118	Transcript_011139;Transcript_036517;Transcript_218716;Transcript_218802;Transcript_233011
GO:0050236	F:pyridoxine:NADP_4-dehydrogenase_activity	5	0.447193	Transcript_001997;Transcript_150349;Transcript_162588;Transcript_169792;Transcript_216341
GO:0010212	P:response_to_ionizing_radiation	5	0.0898724	Transcript_014890;Transcript_017909;Transcript_021459;Transcript_222659;Transcript_243861
GO:0009970	P:cellular_response_to_sulfate_starvation	5	0.115784	Transcript_006356;Transcript_034344;Transcript_043513;Transcript_096477;Transcript_217250
GO:0031640	P:killing_of_cells_of_other_organism	5	0.0920682	Transcript_005461;Transcript_056735;Transcript_152770;Transcript_156609;Transcript_188653
GO:0016746	F:transferase_activity,_transferring_acyl_groups	5	7.8819e-07	Transcript_004220;Transcript_034176;Transcript_187980;Transcript_216383;Transcript_231645
GO:0005987	P:sucrose_catabolic_process	5	0.57164	Transcript_008600;Transcript_043106;Transcript_063879;Transcript_131665;Transcript_165034
GO:0051205	P:protein_insertion_into_membrane	5	0.238385	Transcript_029445;Transcript_162180;Transcript_173765;Transcript_198875;Transcript_244353
GO:0008250	C:oligosaccharyltransferase_complex	5	0.00595118	Transcript_015282;Transcript_065665;Transcript_192756;Transcript_219435;Transcript_229590
GO:0034551	P:mitochondrial_respiratory_chain_complex_III_assembly	5	0.0898724	Transcript_150444;Transcript_230890;Transcript_234409;Transcript_235061;Transcript_244062
GO:0004702	F:receptor_signaling_protein_serine/threonine_kinase_activity	5	0.115784	Transcript_004252;Transcript_009121;Transcript_014297;Transcript_161029;Transcript_165632
GO:0030091	P:protein_repair	4	0.0181957	Transcript_000882;Transcript_031559;Transcript_046493;Transcript_139629
GO:0006265	P:DNA_topological_change	4	0.00769567	Transcript_001079;Transcript_017135;Transcript_189510;Transcript_230389
ko05210	Colorectal_cancer	4	1.75555e-10	Transcript_042857;Transcript_047623;Transcript_141684;Transcript_199440
GO:0031982	C:vesicle	4	0.784727	Transcript_023489;Transcript_151294;Transcript_201523;Transcript_216692
GO:0008203	P:cholesterol_metabolic_process	4	0.0140613	Transcript_061651;Transcript_149307;Transcript_151294;Transcript_170658
GO:0010117	P:photoprotection	4	0.164283	Transcript_022042;Transcript_036696;Transcript_118013;Transcript_158761
GO:0035252	F:UDP-xylosyltransferase_activity	4	0.164283	Transcript_042823;Transcript_161824;Transcript_222814;Transcript_241441
GO:0006379	P:mRNA_cleavage	4	0.0736306	Transcript_032830;Transcript_033998;Transcript_202518;Transcript_222734
GO:0034613	P:cellular_protein_localization	4	5.43682e-05	Transcript_008058;Transcript_011299;Transcript_031150;Transcript_209850
GO:0005667	C:transcription_factor_complex	4	0.0181957	Transcript_009846;Transcript_072542;Transcript_195086;Transcript_229005
GO:0048868	P:pollen_tube_development	4	0.00326834	Transcript_022253;Transcript_062148;Transcript_214400;Transcript_234086
GO:0080031	F:methyl_salicylate_esterase_activity	4	0.0242858	Transcript_040126;Transcript_052882;Transcript_155971;Transcript_221871
GO:0010044	P:response_to_aluminum_ion	4	0.212979	Transcript_004067;Transcript_192248;Transcript_224363;Transcript_233826
GO:0050826	P:response_to_freezing	4	0.00568633	Transcript_004587;Transcript_027199;Transcript_042738;Transcript_193811
GO:0005247	F:voltage-gated_chloride_channel_activity	4	0.0104077	Transcript_152905;Transcript_155866;Transcript_171965;Transcript_226480
GO:0055046	P:microgametogenesis	4	0.000360656	Transcript_036346;Transcript_159501;Transcript_238256;Transcript_238700
GO:0032502	P:developmental_process	4	0.0323769	Transcript_014566;Transcript_043347;Transcript_200178;Transcript_227496
GO:0006303	P:double-strand_break_repair_via_nonhomologous_end_joining	4	0.0758183	Transcript_013610;Transcript_030874;Transcript_041509;Transcript_233134
GO:0016444	P:somatic_cell_DNA_recombination	4	0.0323769	Transcript_014142;Transcript_021918;Transcript_043915;Transcript_222659
GO:0009451	P:RNA_modification	4	0.268631	Transcript_015070;Transcript_018029;Transcript_039614;Transcript_231197
GO:0052853	F:long-chain-(S)-2-hydroxy-long-chain-acid_oxidase_activity	4	1	Transcript_020798;Transcript_091674;Transcript_179003;Transcript_185018
GO:0052655	F:L-valine_transaminase_activity	4	0.342759	Transcript_005196;Transcript_011576;Transcript_053135;Transcript_103284
GO:0010289	P:homogalacturonan_biosynthetic_process	4	0.434415	Transcript_016927;Transcript_030209;Transcript_104797;Transcript_244479
GO:0006835	P:dicarboxylic_acid_transport	4	0.274493	Transcript_036615;Transcript_048191;Transcript_155552;Transcript_241883
GO:1990714	F:hydroxyproline_O-galactosyltransferase_activity	4	1	Transcript_024015;Transcript_043902;Transcript_165441;Transcript_233493
GO:0004749	F:ribose_phosphate_diphosphokinase_activity	4	0.0323769	Transcript_007545;Transcript_037427;Transcript_042232;Transcript_165366
GO:0052832	F:inositol_monophosphate_3-phosphatase_activity	4	0.342759	Transcript_022710;Transcript_030019;Transcript_155584;Transcript_160090
GO:0009937	P:regulation_of_gibberellic_acid_mediated_signaling_pathway	4	0.672037	Transcript_016103;Transcript_040537;Transcript_121475;Transcript_148803
GO:0005310	F:dicarboxylic_acid_transmembrane_transporter_activity	4	0.274493	Transcript_036615;Transcript_048191;Transcript_155552;Transcript_241883
GO:0009960	P:endosperm_development	4	0.00127118	Transcript_007202;Transcript_057723;Transcript_177103;Transcript_203552
GO:0007186	P:G-protein_coupled_receptor_signaling_pathway	4	0.342759	Transcript_044365;Transcript_099346;Transcript_207457;Transcript_243318
GO:0002161	F:aminoacyl-tRNA_editing_activity	4	0.000360656	Transcript_003029;Transcript_013980;Transcript_079474;Transcript_237555
GO:0009901	P:anther_dehiscence	4	0.00238672	Transcript_031433;Transcript_033045;Transcript_043997;Transcript_209799
GO:0009295	C:nucleoid	4	0.0242858	Transcript_153991;Transcript_166172;Transcript_183958;Transcript_240598
GO:0046512	P:sphingosine_biosynthetic_process	4	0.274493	Transcript_041445;Transcript_123202;Transcript_194130;Transcript_230670
ko00730	Thiamine_metabolism	4	0.000360656	Transcript_036006;Transcript_090030;Transcript_216293;Transcript_224977
GO:0033179	C:proton-transporting_V-type_ATPase,_V0_domain	4	5.43682e-05	Transcript_073956;Transcript_173000;Transcript_183515;Transcript_230521
GO:0048813	P:dendrite_morphogenesis	4	0.0104077	Transcript_036517;Transcript_098798;Transcript_229005;Transcript_233011
GO:0046855	P:inositol_phosphate_dephosphorylation	4	0.0430951	Transcript_093409;Transcript_150580;Transcript_223537;Transcript_242230
GO:0071277	P:cellular_response_to_calcium_ion	4	0.0430951	Transcript_039277;Transcript_090184;Transcript_187225;Transcript_240649
GO:0004066	F:asparagine_synthase_(glutamine-hydrolyzing)_activity_	4	0.0758183	Transcript_011835;Transcript_012317;Transcript_109588;Transcript_193487
ko00514	Other_types_of_O-glycan_biosynthesis	4	0.126137	Transcript_149762;Transcript_202998;Transcript_216339;Transcript_225156
GO:0004872	F:receptor_activity	4	2.11517e-06	Transcript_016813;Transcript_173779;Transcript_196849;Transcript_211380
GO:0004556	F:alpha-amylase_activity	4	1	Transcript_016210;Transcript_023120;Transcript_050448;Transcript_241478
GO:0071786	P:endoplasmic_reticulum_tubular_network_organization	4	0.0430951	Transcript_012422;Transcript_033954;Transcript_063881;Transcript_169554
GO:0000777	C:condensed_chromosome_kinetochore_	4	0.000676804	Transcript_023157;Transcript_033297;Transcript_230920;Transcript_235339
GO:0042632	P:cholesterol_homeostasis	4	0.00568633	Transcript_027025;Transcript_049193;Transcript_151294;Transcript_201375
GO:0071806	P:protein_transmembrane_transport	4	0.0189709	Transcript_016146;Transcript_234409;Transcript_235061;Transcript_244062
GO:0051538	F:3_iron,_4_sulfur_cluster_binding	4	0.000276567	Transcript_024377;Transcript_046252;Transcript_138447;Transcript_187104
GO:0048229	P:gametophyte_development	4	0.00174205	Transcript_053308;Transcript_144829;Transcript_169676;Transcript_189748
GO:1900994	P:(-)-secologanin_biosynthetic_process	4	0.00326834	Transcript_034403;Transcript_062566;Transcript_198944;Transcript_235596
ko00521	Streptomycin_biosynthesis	4	0.0965032	Transcript_018566;Transcript_022710;Transcript_030019;Transcript_155584
GO:0009926	P:auxin_polar_transport	4	5.70042e-12	Transcript_012490;Transcript_035857;Transcript_225665;Transcript_236713
GO:0004089	F:carbonate_dehydratase_activity	4	0.00310126	Transcript_012968;Transcript_020282;Transcript_080966;Transcript_187024
GO:0007095	P:mitotic_G2_DNA_damage_checkpoint	4	0.540921	Transcript_027666;Transcript_046002;Transcript_099676;Transcript_197295
GO:0003989	F:acetyl-CoA_carboxylase_activity	4	0.00238672	Transcript_028726;Transcript_080382;Transcript_090548;Transcript_233389
GO:0042752	P:regulation_of_circadian_rhythm	4	2.84618e-05	Transcript_113812;Transcript_149849;Transcript_189510;Transcript_243012
GO:0000220	C:vacuolar_proton-transporting_V-type_ATPase,_V0_domain	4	0.0736306	Transcript_009551;Transcript_016602;Transcript_027002;Transcript_218023
GO:0047924	F:geraniol_dehydrogenase_activity_	4	0.0965032	Transcript_020653;Transcript_043309;Transcript_121381;Transcript_196113
GO:0010540	P:basipetal_auxin_transport	4	2.92752e-08	Transcript_016397;Transcript_095601;Transcript_225665;Transcript_236713
GO:0034707	C:chloride_channel_complex_	4	0.00419982	Transcript_152905;Transcript_155866;Transcript_171965;Transcript_226480
GO:0017077	F:oxidative_phosphorylation_uncoupler_activity	4	1	Transcript_002810;Transcript_048191;Transcript_174520;Transcript_241883
GO:0048767	P:root_hair_elongation	4	2.94431e-06	Transcript_004260;Transcript_012490;Transcript_072738;Transcript_212311
GO:0001889	P:liver_development	4	0.0758183	Transcript_009092;Transcript_040271;Transcript_154664;Transcript_196849
GO:0051568	P:histone_H3-K4_methylation	4	0.000493976	Transcript_121896;Transcript_149184;Transcript_173944;Transcript_243861
GO:0006493	P:protein_O-linked_glycosylation	4	0.164283	Transcript_149762;Transcript_202998;Transcript_216339;Transcript_225156
GO:0030018	C:Z_disc	4	0.000493976	Transcript_027666;Transcript_030990;Transcript_046002;Transcript_225114
GO:0045116	P:protein_neddylation	4	0.0104077	Transcript_025603;Transcript_030085;Transcript_031758;Transcript_227907
GO:0031012	C:extracellular_matrix_	4	0.000493976	Transcript_023790;Transcript_106459;Transcript_229373;Transcript_240298
GO:0042162	F:telomeric_DNA_binding	4	0.342759	Transcript_013610;Transcript_030874;Transcript_041509;Transcript_233134
GO:0030308	P:negative_regulation_of_cell_growth	4	0.0181957	Transcript_044265;Transcript_198631;Transcript_216653;Transcript_218401
GO:0006816	P:calcium_ion_transport	4	2.07219e-08	Transcript_056334;Transcript_103871;Transcript_235413;Transcript_236646
GO:0043086	P:negative_regulation_of_catalytic_activity	4	0.000144131	Transcript_036738;Transcript_059207;Transcript_159817;Transcript_208901
GO:0005452	F:inorganic_anion_exchanger_activity	4	0.0572398	Transcript_070694;Transcript_078810;Transcript_206885;Transcript_228063
GO:0016024	P:CDP-diacylglycerol_biosynthetic_process	4	0.000493976	Transcript_017685;Transcript_026397;Transcript_029406;Transcript_167046
GO:0008272	P:sulfate_transport	4	0.268631	Transcript_006356;Transcript_096477;Transcript_202823;Transcript_217250
GO:0042623	F:ATPase_activity,_coupled	4	0.0758183	Transcript_014770;Transcript_150444;Transcript_230890;Transcript_234993
GO:0006353	P:DNA-templated_transcription,_termination	4	0.0736306	Transcript_042738;Transcript_162607;Transcript_178073;Transcript_186400
GO:0047100	F:glyceraldehyde-3-phosphate_dehydrogenase_(NADP+)_(phosphorylating)_activity	4	0.545803	Transcript_029726;Transcript_128232;Transcript_155850;Transcript_234220
GO:0006807	P:nitrogen_compound_metabolic_process	4	0.00174205	Transcript_012453;Transcript_099227;Transcript_196849;Transcript_234928
GO:0003978	F:UDP-glucose_4-epimerase_activity	4	0.0323769	Transcript_003524;Transcript_074885;Transcript_174469;Transcript_235702
GO:0001558	P:regulation_of_cell_growth	4	0.00419982	Transcript_032764;Transcript_040637;Transcript_158529;Transcript_173665
GO:0007286	P:spermatid_development	4	0.274493	Transcript_016456;Transcript_019100;Transcript_087038;Transcript_087162
GO:0009697	P:salicylic_acid_biosynthetic_process	4	0.0242858	Transcript_001711;Transcript_035659;Transcript_053538;Transcript_065706
GO:0046688	P:response_to_copper_ion	4	0.274493	Transcript_086850;Transcript_149249;Transcript_176240;Transcript_235120
GO:0000210	F:NAD+_diphosphatase_activity	4	0.0242858	Transcript_040460;Transcript_115165;Transcript_217433;Transcript_223313
GO:0007163	P:establishment_or_maintenance_of_cell_polarity	4	0.0323769	Transcript_084439;Transcript_089102;Transcript_209023;Transcript_227945
GO:0007032	P:endosome_organization	4	0.0758183	Transcript_018886;Transcript_151618;Transcript_161256;Transcript_227772
GO:0046983	F:protein_dimerization_activity	4	0.0736306	Transcript_016110;Transcript_029541;Transcript_042567;Transcript_223409
GO:0070676	P:intralumenal_vesicle_formation	4	0.0430951	Transcript_083038;Transcript_126621;Transcript_170293;Transcript_232583
GO:0001944	P:vasculature_development	4	0.000104093	Transcript_005368;Transcript_041613;Transcript_189646;Transcript_240782
GO:0016573	P:histone_acetylation	4	0.000360656	Transcript_024653;Transcript_196794;Transcript_229005;Transcript_240717
GO:0016279	F:protein-lysine_N-methyltransferase_activity	4	0.274493	Transcript_019467;Transcript_094348;Transcript_219433;Transcript_222867
GO:0046873	F:metal_ion_transmembrane_transporter_activity	4	0.0189709	Transcript_002045;Transcript_027000;Transcript_201525;Transcript_214491
GO:0048188	C:Set1C/COMPASS_complex	4	0.342759	Transcript_106245;Transcript_173944;Transcript_194996;Transcript_214469
GO:0006461	P:protein_complex_assembly	4	0.0965032	Transcript_025627;Transcript_079199;Transcript_084534;Transcript_214387
GO:2000011	P:regulation_of_adaxial/abaxial_pattern_formation	4	0.274493	Transcript_020317;Transcript_037258;Transcript_158529;Transcript_235950
GO:0005977	P:glycogen_metabolic_process	4	0.126137	Transcript_040305;Transcript_096431;Transcript_112757;Transcript_230920
GO:0007062	P:sister_chromatid_cohesion	4	0.000676804	Transcript_030990;Transcript_100752;Transcript_225114;Transcript_228251
GO:0015780	P:nucleotide-sugar_transport	4	0.212979	Transcript_112543;Transcript_186214;Transcript_193534;Transcript_222095
ko00790	Folate_biosynthesis	4	0.000276567	Transcript_011688;Transcript_028080;Transcript_032949;Transcript_216654
GO:0030276	F:clathrin_binding	4	0.0323769	Transcript_013097;Transcript_024167;Transcript_042319;Transcript_189851
GO:0010215	P:cellulose_microfibril_organization	4	0.00174205	Transcript_042756;Transcript_098619;Transcript_121475;Transcript_155519
GO:0004615	F:phosphomannomutase_activity	4	0.545803	Transcript_012141;Transcript_031292;Transcript_212135;Transcript_235002
GO:0071712	P:ER-associated_misfolded_protein_catabolic_process	4	0.342759	Transcript_006757;Transcript_031964;Transcript_241709;Transcript_241809
GO:0052854	F:medium-chain-(S)-2-hydroxy-acid_oxidase_activity	4	1	Transcript_020798;Transcript_091674;Transcript_179003;Transcript_185018
GO:0008381	F:mechanically-gated_ion_channel_activity	4	0.342759	Transcript_130404;Transcript_151697;Transcript_167845;Transcript_228328
GO:0009533	C:chloroplast_stromal_thylakoid	4	1	Transcript_025627;Transcript_034963;Transcript_044209;Transcript_104311
GO:0018344	P:protein_geranylgeranylation	4	1	Transcript_032683;Transcript_036750;Transcript_046543;Transcript_243607
ko00906	Carotenoid_biosynthesis	4	0.00326834	Transcript_064376;Transcript_191814;Transcript_234806;Transcript_238834
GO:0016531	F:copper_chaperone_activity	4	0.672037	Transcript_027524;Transcript_040354;Transcript_161060;Transcript_175091
GO:0010017	P:red_or_far-red_light_signaling_pathway	4	1.55527e-05	Transcript_031196;Transcript_032257;Transcript_195229;Transcript_211841
GO:0006488	P:dolichol-linked_oligosaccharide_biosynthetic_process	4	0.0736306	Transcript_026511;Transcript_034685;Transcript_170169;Transcript_234247
GO:0008970	F:phosphatidylcholine_1-acylhydrolase_activity	4	0.00310126	Transcript_038313;Transcript_045780;Transcript_186738;Transcript_237498
GO:0006325	P:chromatin_organization	4	0.00419982	Transcript_025469;Transcript_058742;Transcript_100152;Transcript_173665
GO:0002213	P:defense_response_to_insect	4	0.0736306	Transcript_146024;Transcript_196913;Transcript_233312;Transcript_236732
GO:0007626	P:locomotory_behavior	4	0.342759	Transcript_004788;Transcript_035258;Transcript_042164;Transcript_069308
GO:1900459	P:positive_regulation_of_brassinosteroid_mediated_signaling_pathway	4	0.0104077	Transcript_003957;Transcript_094302;Transcript_205544;Transcript_235222
GO:0042644	C:chloroplast_nucleoid	4	0.0736306	Transcript_082537;Transcript_177527;Transcript_183958;Transcript_240598
GO:1902475	P:L-alpha-amino_acid_transmembrane_transport	4	0.0323769	Transcript_022569;Transcript_028356;Transcript_161599;Transcript_198712
ko05222	Small_cell_lung_cancer	4	0.000493976	Transcript_003398;Transcript_016807;Transcript_238705;Transcript_242230
GO:0042335	P:cuticle_development	4	0.00026343	Transcript_005776;Transcript_006369;Transcript_035258;Transcript_069308
GO:0006491	P:N-glycan_processing	4	0.0242858	Transcript_004469;Transcript_033617;Transcript_156195;Transcript_190807
GO:0009691	P:cytokinin_biosynthetic_process	4	0.0104077	Transcript_002811;Transcript_017700;Transcript_041620;Transcript_216128
ko04670	Leukocyte_transendothelial_migration	4	2.94431e-06	Transcript_042857;Transcript_088161;Transcript_141684;Transcript_238732
GO:0032266	F:phosphatidylinositol-3-phosphate_binding	4	0.0181957	Transcript_008746;Transcript_011918;Transcript_083601;Transcript_103059
GO:0005669	C:transcription_factor_TFIID_complex	4	0.00568633	Transcript_011935;Transcript_040271;Transcript_196794;Transcript_226722
GO:0051321	P:meiotic_cell_cycle	4	7.97676e-06	Transcript_112949;Transcript_151606;Transcript_176429;Transcript_192573
GO:0042826	F:histone_deacetylase_binding	4	0.342759	Transcript_016456;Transcript_156640;Transcript_189510;Transcript_229005
GO:0048513	P:organ_development	4	0.0181957	Transcript_048789;Transcript_095601;Transcript_141551;Transcript_192239
GO:0098655	P:cation_transmembrane_transport	4	3.03848e-05	Transcript_016549;Transcript_018242;Transcript_198712;Transcript_208567
GO:0008320	F:protein_transmembrane_transporter_activity	4	0.0323769	Transcript_083711;Transcript_234409;Transcript_235061;Transcript_244062
GO:0071782	C:endoplasmic_reticulum_tubular_network	4	0.0430951	Transcript_012422;Transcript_033954;Transcript_063881;Transcript_169554
ko05410	Hypertrophic_cardiomyopathy_(HCM)	4	0.00419982	Transcript_011423;Transcript_088161;Transcript_151075;Transcript_216217
GO:0047631	F:ADP-ribose_diphosphatase_activity_	4	0.0242858	Transcript_040460;Transcript_115165;Transcript_217433;Transcript_223313
GO:0008327	F:methyl-CpG_binding	4	0.00568633	Transcript_081790;Transcript_098148;Transcript_153520;Transcript_240717
GO:0045332	P:phospholipid_translocation	4	0.268631	Transcript_032853;Transcript_039009;Transcript_209704;Transcript_242551
GO:0009231	P:riboflavin_biosynthetic_process	4	0.000927505	Transcript_050059;Transcript_074044;Transcript_181796;Transcript_199686
GO:0051453	P:regulation_of_intracellular_pH	4	0.126137	Transcript_043084;Transcript_078810;Transcript_206885;Transcript_228063
GO:0009864	P:induced_systemic_resistance,_jasmonic_acid_mediated_signaling_pathway	4	0.00568633	Transcript_056334;Transcript_103871;Transcript_108142;Transcript_242340
GO:0000943	C:retrotransposon_nucleocapsid	4	0.0140613	Transcript_025591;Transcript_032348;Transcript_045095;Transcript_149605
ko04977	Vitamin_digestion_and_absorption	4	0.672037	Transcript_053358;Transcript_126565;Transcript_195679;Transcript_244139
GO:0007231	P:osmosensory_signaling_pathway	4	0.540921	Transcript_006356;Transcript_096477;Transcript_202823;Transcript_217250
GO:0009767	P:photosynthetic_electron_transport_chain	4	0.0181957	Transcript_001711;Transcript_002052;Transcript_005103;Transcript_133040
GO:0015802	P:basic_amino_acid_transport	4	0.540921	Transcript_009106;Transcript_022464;Transcript_022569;Transcript_050253
GO:0006163	P:purine_nucleotide_metabolic_process	4	0.0140613	Transcript_070575;Transcript_096593;Transcript_189748;Transcript_204142
GO:0005385	F:zinc_ion_transmembrane_transporter_activity	4	0.0758183	Transcript_027000;Transcript_042087;Transcript_158088;Transcript_214491
ko04660	T_cell_receptor_signaling_pathway	4	5.83728e-07	Transcript_047623;Transcript_156614;Transcript_199440;Transcript_227948
GO:0004439	F:phosphatidylinositol-4,5-bisphosphate_5-phosphatase_activity	4	0.0189709	Transcript_093409;Transcript_150580;Transcript_160203;Transcript_223537
GO:0010286	P:heat_acclimation	4	1.42256e-09	Transcript_016807;Transcript_018247;Transcript_043269;Transcript_070778
GO:0019048	P:modulation_by_virus_of_host_morphology_or_physiology	4	0.825782	Transcript_004120;Transcript_016022;Transcript_179003;Transcript_184279
GO:0005978	P:glycogen_biosynthetic_process	4	0.000104093	Transcript_041688;Transcript_096431;Transcript_118645;Transcript_149454
GO:0030100	P:regulation_of_endocytosis	4	1	Transcript_035369;Transcript_051617;Transcript_161256;Transcript_162179
GO:0048441	P:petal_development	4	0.126137	Transcript_008650;Transcript_042364;Transcript_043478;Transcript_159015
GO:0051233	C:spindle_midzone	4	0.164283	Transcript_150565;Transcript_190714;Transcript_236391;Transcript_238732
GO:0005832	C:chaperonin-containing_T-complex_	4	0.00310126	Transcript_014770;Transcript_033704;Transcript_075930;Transcript_175887
GO:0005876	C:spindle_microtubule	4	0.0181957	Transcript_037116;Transcript_058742;Transcript_150565;Transcript_232493
GO:0043190	C:ATP-binding_cassette_(ABC)_transporter_complex_	4	0.545803	Transcript_042504;Transcript_065264;Transcript_220512;Transcript_228752
ko04620	Toll-like_receptor_signaling_pathway	4	8.29273e-08	Transcript_042857;Transcript_047623;Transcript_141684;Transcript_199440
GO:0007076	P:mitotic_chromosome_condensation	4	0.0140613	Transcript_030990;Transcript_173665;Transcript_224812;Transcript_225114
GO:0010207	P:photosystem_II_assembly	4	0.00326834	Transcript_001711;Transcript_010060;Transcript_044209;Transcript_209703
GO:0008568	F:microtubule-severing_ATPase_activity	4	0.00568633	Transcript_020201;Transcript_222411;Transcript_224619;Transcript_231139
GO:0048831	P:regulation_of_shoot_system_development	4	0.0181957	Transcript_016103;Transcript_148803;Transcript_202823;Transcript_203777
GO:0043966	P:histone_H3_acetylation	4	0.0104077	Transcript_040271;Transcript_101040;Transcript_173944;Transcript_240717
GO:0090333	P:regulation_of_stomatal_closure	4	0.0572398	Transcript_031577;Transcript_039277;Transcript_187225;Transcript_229716
GO:0070531	C:BRCA1-A_complex_	4	0.342759	Transcript_014890;Transcript_017909;Transcript_021459;Transcript_029817
GO:1990077	C:primosome_complex	4	0.672037	Transcript_024850;Transcript_084390;Transcript_203919;Transcript_227703
GO:0051019	F:mitogen-activated_protein_kinase_binding	4	0.798436	Transcript_006356;Transcript_096477;Transcript_203093;Transcript_217250
GO:0007525	P:somatic_muscle_development	4	0.0965032	Transcript_006512;Transcript_015664;Transcript_030990;Transcript_225114
GO:0080130	F:L-phenylalanine:2-oxoglutarate_aminotransferase_activity	4	0.00026343	Transcript_049636;Transcript_082806;Transcript_161380;Transcript_222892
GO:0016702	F:oxidoreductase_activity,_acting_on_single_donors_with_incorporation_of_molecular_oxygen,_incorporation_of_two_atoms_of_oxygen	4	0.268631	Transcript_011917;Transcript_015276;Transcript_035505;Transcript_092679
GO:0052852	F:very-long-chain-(S)-2-hydroxy-acid_oxidase_activity	4	1	Transcript_020798;Transcript_091674;Transcript_179003;Transcript_185018
GO:0080022	P:primary_root_development	4	0.00568633	Transcript_063879;Transcript_200447;Transcript_216217;Transcript_217772
GO:0000339	F:RNA_cap_binding	4	0.126137	Transcript_042932;Transcript_043594;Transcript_173665;Transcript_224762
GO:0006563	P:L-serine_metabolic_process	4	3.93248e-05	Transcript_044878;Transcript_047399;Transcript_223384;Transcript_243136
GO:0052654	F:L-leucine_transaminase_activity	4	0.342759	Transcript_005196;Transcript_011576;Transcript_053135;Transcript_103284
GO:0009060	P:aerobic_respiration	4	2.84618e-05	Transcript_013688;Transcript_015693;Transcript_158785;Transcript_164716
GO:0006646	P:phosphatidylethanolamine_biosynthetic_process	4	0.00326834	Transcript_005080;Transcript_038038;Transcript_150958;Transcript_233083
ko04940	Type_I_diabetes_mellitus	4	0.0189709	Transcript_016668;Transcript_155852;Transcript_162305;Transcript_197658
GO:0009229	P:thiamine_diphosphate_biosynthetic_process	4	0.0965032	Transcript_036006;Transcript_090030;Transcript_216293;Transcript_224977
GO:0034663	C:endoplasmic_reticulum_chaperone_complex_	4	1	Transcript_003919;Transcript_006757;Transcript_015001;Transcript_023790
GO:0015866	P:ADP_transport	4	0.0736306	Transcript_011381;Transcript_029830;Transcript_045165;Transcript_233863
GO:0030552	F:cAMP_binding	4	0.000199633	Transcript_017464;Transcript_022515;Transcript_192811;Transcript_213359
GO:0045995	P:regulation_of_embryonic_development	4	0.000144131	Transcript_014745;Transcript_173665;Transcript_205797;Transcript_238155
GO:0035371	C:microtubule_plus-end	4	1	Transcript_011299;Transcript_015088;Transcript_030766;Transcript_031150
GO:0033320	P:UDP-D-xylose_biosynthetic_process	4	0.0140613	Transcript_006882;Transcript_043198;Transcript_061770;Transcript_075566
GO:0008026	F:ATP-dependent_helicase_activity	4	0.0140613	Transcript_005281;Transcript_009350;Transcript_209767;Transcript_216132
ko04062	Chemokine_signaling_pathway	4	7.38559e-09	Transcript_042857;Transcript_047623;Transcript_141684;Transcript_199440
GO:0016151	F:nickel_cation_binding	4	0.274493	Transcript_012453;Transcript_025512;Transcript_234074;Transcript_234928
GO:0010225	P:response_to_UV-C	4	0.342759	Transcript_089195;Transcript_200917;Transcript_227209;Transcript_228277
GO:0043067	P:regulation_of_programmed_cell_death	4	0.0189709	Transcript_007164;Transcript_012117;Transcript_059234;Transcript_151424
GO:0043564	C:Ku70:Ku80_complex	4	0.371071	Transcript_013610;Transcript_030874;Transcript_041509;Transcript_233134
GO:1901001	P:negative_regulation_of_response_to_salt_stress	4	0.0758183	Transcript_196575;Transcript_205797;Transcript_233979;Transcript_241851
GO:0004427	F:inorganic_diphosphatase_activity_	4	3.03848e-05	Transcript_011348;Transcript_015361;Transcript_231744;Transcript_243566
GO:0008610	P:lipid_biosynthetic_process	4	1	Transcript_015934;Transcript_098869;Transcript_167707;Transcript_242079
GO:0006418	P:tRNA_aminoacylation_for_protein_translation	4	0.672037	Transcript_000781;Transcript_014671;Transcript_020710;Transcript_084534
GO:0048278	P:vesicle_docking	4	0.00026343	Transcript_069330;Transcript_175654;Transcript_198876;Transcript_232552
GO:0008934	F:inositol_monophosphate_1-phosphatase_activity	4	0.342759	Transcript_022710;Transcript_030019;Transcript_155584;Transcript_160090
GO:0052833	F:inositol_monophosphate_4-phosphatase_activity	4	0.342759	Transcript_022710;Transcript_030019;Transcript_155584;Transcript_160090
GO:0008253	F:5'-nucleotidase_activity	4	0.0242858	Transcript_014013;Transcript_053238;Transcript_158442;Transcript_183707
GO:0042645	C:mitochondrial_nucleoid	4	0.0430951	Transcript_110612;Transcript_187470;Transcript_226638;Transcript_238131
GO:0030658	C:transport_vesicle_membrane	4	0.212979	Transcript_017271;Transcript_156950;Transcript_167308;Transcript_191915
ko00760	Nicotinate_and_nicotinamide_metabolism	4	2.96014e-07	Transcript_014013;Transcript_015018;Transcript_053238;Transcript_183707
GO:0004107	F:chorismate_synthase_activity_	4	0.540921	Transcript_009838;Transcript_033624;Transcript_035392;Transcript_114688
GO:0050829	P:defense_response_to_Gram-negative_bacterium	4	0.0736306	Transcript_024881;Transcript_029575;Transcript_063609;Transcript_167963
GO:0009317	C:acetyl-CoA_carboxylase_complex_	4	0.0181957	Transcript_028726;Transcript_080382;Transcript_090548;Transcript_233389
GO:0047274	F:galactinol-sucrose_galactosyltransferase_activity	4	0.00238672	Transcript_020714;Transcript_094354;Transcript_171935;Transcript_239705
GO:0008022	F:protein_C-terminus_binding	4	0.00568633	Transcript_031951;Transcript_068441;Transcript_152619;Transcript_189510
GO:0009695	P:jasmonic_acid_biosynthetic_process	4	1.15444e-06	Transcript_065706;Transcript_099505;Transcript_176842;Transcript_224807
GO:0006021	P:inositol_biosynthetic_process	4	0.268631	Transcript_022710;Transcript_030019;Transcript_155584;Transcript_160090
GO:0043967	P:histone_H4_acetylation	4	0.0572398	Transcript_007752;Transcript_020316;Transcript_028228;Transcript_240717
GO:0003896	F:DNA_primase_activity	4	0.268631	Transcript_024850;Transcript_084390;Transcript_203919;Transcript_227703
GO:0052656	F:L-isoleucine_transaminase_activity	4	0.342759	Transcript_005196;Transcript_011576;Transcript_053135;Transcript_103284
GO:0005085	F:guanyl-nucleotide_exchange_factor_activity	4	1.04079e-08	Transcript_024465;Transcript_086024;Transcript_089183;Transcript_156136
GO:0008202	P:steroid_metabolic_process	4	0.825782	Transcript_038137;Transcript_141714;Transcript_166765;Transcript_187518
GO:0019252	P:starch_biosynthetic_process	4	1.27029e-13	Transcript_032902;Transcript_041688;Transcript_104566;Transcript_149454
GO:0070987	P:error-free_translesion_synthesis	4	0.540921	Transcript_031964;Transcript_053673;Transcript_186094;Transcript_188612
GO:0000245	P:spliceosomal_complex_assembly	4	0.0323769	Transcript_010789;Transcript_015286;Transcript_189117;Transcript_241198
GO:0004128	F:cytochrome-b5_reductase_activity,_acting_on_NAD(P)H	4	0.268631	Transcript_050536;Transcript_102363;Transcript_186581;Transcript_209949
GO:0080092	P:regulation_of_pollen_tube_growth	4	2.84618e-05	Transcript_009110;Transcript_011971;Transcript_144922;Transcript_181058
GO:0000794	C:condensed_nuclear_chromosome_	4	0.000199633	Transcript_016829;Transcript_030990;Transcript_131580;Transcript_225114
GO:0009625	P:response_to_insect	4	0.0758183	Transcript_031557;Transcript_033045;Transcript_043997;Transcript_224903
GO:0018022	P:peptidyl-lysine_methylation	4	1	Transcript_019467;Transcript_094348;Transcript_153520;Transcript_222867
GO:0012507	C:ER_to_Golgi_transport_vesicle_membrane	4	3.03848e-05	Transcript_018689;Transcript_174694;Transcript_187317;Transcript_244730
GO:0005795	C:Golgi_stack	4	0.00026343	Transcript_018689;Transcript_025912;Transcript_149321;Transcript_196613
GO:0010227	P:floral_organ_abscission	4	0.000104093	Transcript_018602;Transcript_035219;Transcript_230500;Transcript_237610
GO:0006471	P:protein_ADP-ribosylation	4	0.0189709	Transcript_005796;Transcript_027565;Transcript_048502;Transcript_222659
GO:0009435	P:NAD_biosynthetic_process	4	0.0323769	Transcript_015018;Transcript_210413;Transcript_216965;Transcript_234662
GO:0033169	P:histone_H3-K9_demethylation	4	0.126137	Transcript_006542;Transcript_036346;Transcript_044810;Transcript_197324
GO:0000077	P:DNA_damage_checkpoint	4	0.540921	Transcript_156640;Transcript_193260;Transcript_197295;Transcript_224812
GO:0045475	P:locomotor_rhythm	4	0.798436	Transcript_014745;Transcript_098798;Transcript_188900;Transcript_214162
GO:0009982	F:pseudouridine_synthase_activity	4	3.93248e-05	Transcript_044359;Transcript_200390;Transcript_223871;Transcript_240581
GO:0008378	F:galactosyltransferase_activity	4	0.00238672	Transcript_004507;Transcript_017448;Transcript_193811;Transcript_213787
GO:0005459	F:UDP-galactose_transmembrane_transporter_activity	4	0.0189709	Transcript_042755;Transcript_188243;Transcript_193534;Transcript_206282
GO:0046540	C:U4/U6_x_U5_tri-snRNP_complex	4	0.000676804	Transcript_006686;Transcript_036386;Transcript_183966;Transcript_244667
GO:0010588	P:cotyledon_vascular_tissue_pattern_formation	4	0.0189709	Transcript_014614;Transcript_047222;Transcript_093409;Transcript_104892
GO:0008483	F:transaminase_activity	4	0.00769567	Transcript_025090;Transcript_046799;Transcript_146010;Transcript_153764
GO:0035091	F:phosphatidylinositol_binding	4	0.0736306	Transcript_014566;Transcript_043347;Transcript_077629;Transcript_227496
GO:0005546	F:phosphatidylinositol-4,5-bisphosphate_binding	4	0.342759	Transcript_004067;Transcript_023455;Transcript_033079;Transcript_241205
GO:0015929	F:hexosaminidase_activity	4	0.825782	Transcript_008082;Transcript_021879;Transcript_175406;Transcript_186964
GO:0009649	P:entrainment_of_circadian_clock	4	0.00326834	Transcript_024465;Transcript_086024;Transcript_089183;Transcript_156136
GO:0030139	C:endocytic_vesicle	4	0.0323769	Transcript_033544;Transcript_049359;Transcript_161256;Transcript_166731
GO:0004869	F:cysteine-type_endopeptidase_inhibitor_activity	4	0.0736306	Transcript_159485;Transcript_161966;Transcript_176212;Transcript_182724
GO:0010119	P:regulation_of_stomatal_movement	4	2.96014e-07	Transcript_023455;Transcript_041388;Transcript_124476;Transcript_241205
GO:0015807	P:L-amino_acid_transport	4	0.0736306	Transcript_022569;Transcript_028356;Transcript_161599;Transcript_198712
GO:0051753	F:mannan_synthase_activity	4	0.0181957	Transcript_032760;Transcript_033196;Transcript_055435;Transcript_154436
GO:1903507	P:negative_regulation_of_nucleic_acid-templated_transcription	4	0.274493	Transcript_011753;Transcript_072542;Transcript_150574;Transcript_195086
GO:0045859	P:regulation_of_protein_kinase_activity	4	0.00026343	Transcript_033853;Transcript_049225;Transcript_166227;Transcript_188900
GO:0003871	F:5-methyltetrahydropteroyltriglutamate-homocysteine_S-methyltransferase_activity	4	0.545803	Transcript_022580;Transcript_057381;Transcript_119864;Transcript_179651
GO:0047334	F:diphosphate-fructose-6-phosphate_1-phosphotransferase_activity	4	0.545803	Transcript_009113;Transcript_024848;Transcript_150144;Transcript_188805
GO:0070536	P:protein_K63-linked_deubiquitination	4	0.0965032	Transcript_014890;Transcript_017909;Transcript_035414;Transcript_238978
GO:0000003	P:reproduction	4	0.0758183	Transcript_013605;Transcript_186273;Transcript_189646;Transcript_203408
GO:0010051	P:xylem_and_phloem_pattern_formation	4	0.00326834	Transcript_004665;Transcript_093409;Transcript_099685;Transcript_237975
GO:0005687	C:U4_snRNP	4	0.0572398	Transcript_185589;Transcript_191863;Transcript_197498;Transcript_244667
GO:0005680	C:anaphase-promoting_complex_	4	0.0572398	Transcript_006688;Transcript_033497;Transcript_143107;Transcript_169395
ko05032	Morphine_addiction	4	0.545803	Transcript_011643;Transcript_027093;Transcript_153016;Transcript_198712
ko00950	Isoquinoline_alkaloid_biosynthesis	4	0.000199633	Transcript_049636;Transcript_102866;Transcript_161507;Transcript_182855
GO:0007519	P:skeletal_muscle_tissue_development	4	0.0736306	Transcript_002541;Transcript_030990;Transcript_211140;Transcript_225114
ko05223	Non-small_cell_lung_cancer	4	0.000144131	Transcript_047623;Transcript_156614;Transcript_199440;Transcript_236927
GO:0009432	P:SOS_response	4	1	Transcript_115044;Transcript_191489;Transcript_192198;Transcript_215297
GO:0010214	P:seed_coat_development	4	1.62508e-06	Transcript_014313;Transcript_037922;Transcript_042324;Transcript_187465
GO:0035064	F:methylated_histone_binding	4	0.00127118	Transcript_035517;Transcript_057767;Transcript_139660;Transcript_173944
GO:0008195	F:phosphatidate_phosphatase_activity	4	0.0181957	Transcript_018828;Transcript_034742;Transcript_048279;Transcript_164814
GO:0010205	P:photoinhibition	4	1	Transcript_006968;Transcript_075306;Transcript_166179;Transcript_242801
GO:0003878	F:ATP_citrate_synthase_activity	4	0.0736306	Transcript_005683;Transcript_098869;Transcript_156803;Transcript_167707
GO:0007031	P:peroxisome_organization	4	1.5059e-07	Transcript_025715;Transcript_059679;Transcript_114161;Transcript_241901
GO:0000910	P:cytokinesis	4	0.0242858	Transcript_003962;Transcript_042567;Transcript_097854;Transcript_223248
GO:0000387	P:spliceosomal_snRNP_assembly	4	0.0430951	Transcript_185589;Transcript_191863;Transcript_197498;Transcript_244667
GO:0072334	P:UDP-galactose_transmembrane_transport	4	0.0189709	Transcript_042755;Transcript_188243;Transcript_193534;Transcript_206282
GO:0031647	P:regulation_of_protein_stability	4	0.0181957	Transcript_019295;Transcript_025603;Transcript_227907;Transcript_242230
ko00360	Phenylalanine_metabolism	4	1.07543e-07	Transcript_023489;Transcript_049636;Transcript_161507;Transcript_201523
GO:0030665	C:clathrin-coated_vesicle_membrane_	4	3.93248e-05	Transcript_083057;Transcript_180120;Transcript_192887;Transcript_237478
GO:0007498	P:mesoderm_development	4	0.0242858	Transcript_027666;Transcript_030990;Transcript_046002;Transcript_225114
GO:0009933	P:meristem_structural_organization	4	1.1135e-05	Transcript_037258;Transcript_042738;Transcript_083500;Transcript_230255
GO:0045814	P:negative_regulation_of_gene_expression,_epigenetic	4	0.212979	Transcript_016154;Transcript_043195;Transcript_149881;Transcript_242922
GO:0006270	P:DNA_replication_initiation	4	0.00127118	Transcript_065669;Transcript_072481;Transcript_096227;Transcript_234110
GO:0071458	C:integral_component_of_cytoplasmic_side_of_endoplasmic_reticulum_membrane	4	0.0242858	Transcript_012422;Transcript_033954;Transcript_063881;Transcript_169554
GO:0000178	C:exosome_(RNase_complex)	4	0.0242858	Transcript_007852;Transcript_009033;Transcript_072702;Transcript_219623
GO:0009612	P:response_to_mechanical_stimulus	4	0.0965032	Transcript_035857;Transcript_044878;Transcript_191620;Transcript_209425
GO:0033116	C:endoplasmic_reticulum-Golgi_intermediate_compartment_membrane	4	0.00127118	Transcript_023362;Transcript_123870;Transcript_155078;Transcript_202427
GO:0032549	F:ribonucleoside_binding	4	0.212979	Transcript_065708;Transcript_079006;Transcript_188963;Transcript_190451
GO:0004069	F:L-aspartate:2-oxoglutarate_aminotransferase_activity	4	0.0104077	Transcript_049636;Transcript_082806;Transcript_161380;Transcript_222892
GO:0044205	P:'de_novo'_UMP_biosynthetic_process	4	0.0323769	Transcript_010249;Transcript_014023;Transcript_076001;Transcript_237938
GO:0009931	F:calcium-dependent_protein_serine/threonine_kinase_activity	4	5.24548e-09	Transcript_021004;Transcript_046627;Transcript_083718;Transcript_173863
GO:0019307	P:mannose_biosynthetic_process	4	0.825782	Transcript_012141;Transcript_031292;Transcript_212135;Transcript_235002
GO:0016925	P:protein_sumoylation	4	7.68662e-08	Transcript_031147;Transcript_089195;Transcript_097307;Transcript_232924
GO:0000028	P:ribosomal_small_subunit_assembly	4	0.0323769	Transcript_018213;Transcript_089022;Transcript_110572;Transcript_239789
GO:0030422	P:production_of_siRNA_involved_in_RNA_interference	4	0.000104093	Transcript_096996;Transcript_112168;Transcript_124696;Transcript_178073
GO:0015693	P:magnesium_ion_transport	4	5.83728e-07	Transcript_018242;Transcript_029410;Transcript_080135;Transcript_095467
GO:0019903	F:protein_phosphatase_binding	4	0.0736306	Transcript_001431;Transcript_023790;Transcript_031964;Transcript_099701
GO:0015095	F:magnesium_ion_transmembrane_transporter_activity	4	8.29273e-08	Transcript_018242;Transcript_029410;Transcript_080135;Transcript_095467
GO:0010075	P:regulation_of_meristem_growth	4	0.000927505	Transcript_053308;Transcript_139224;Transcript_144829;Transcript_168530
GO:0010053	P:root_epidermal_cell_differentiation	4	2.1734e-05	Transcript_076341;Transcript_091033;Transcript_212311;Transcript_236167
GO:1990023	C:mitotic_spindle_midzone	4	1	Transcript_015088;Transcript_057704;Transcript_177955;Transcript_227772
GO:0051920	F:peroxiredoxin_activity	4	0.00127118	Transcript_050011;Transcript_092858;Transcript_149610;Transcript_188345
ko00253	Tetracycline_biosynthesis	4	0.0430951	Transcript_028726;Transcript_080382;Transcript_090548;Transcript_233389
GO:0051302	P:regulation_of_cell_division	4	0.0189709	Transcript_032764;Transcript_040637;Transcript_168530;Transcript_238155
GO:0007349	P:cellularization	4	0.540921	Transcript_098798;Transcript_160093;Transcript_197295;Transcript_224124
GO:0010162	P:seed_dormancy_process	4	0.00769567	Transcript_004587;Transcript_027199;Transcript_042738;Transcript_234806
GO:0032585	C:multivesicular_body_membrane	4	0.825782	Transcript_014566;Transcript_018886;Transcript_043347;Transcript_227496
GO:0009773	P:photosynthetic_electron_transport_in_photosystem_I	4	0.00769567	Transcript_081088;Transcript_118013;Transcript_153991;Transcript_166172
GO:0000290	P:deadenylation-dependent_decapping_of_nuclear-transcribed_mRNA	4	0.0430951	Transcript_001387;Transcript_163680;Transcript_222288;Transcript_224762
GO:0080001	P:mucilage_extrusion_from_seed_coat	4	0.000493976	Transcript_014313;Transcript_042324;Transcript_187465;Transcript_205797
GO:0000329	C:fungal-type_vacuole_membrane_	4	0.0242858	Transcript_000645;Transcript_035369;Transcript_162179;Transcript_198712
GO:0009094	P:L-phenylalanine_biosynthetic_process	4	0.0736306	Transcript_082806;Transcript_133869;Transcript_161380;Transcript_187678
GO:0003678	F:DNA_helicase_activity	4	0.0140613	Transcript_007752;Transcript_065669;Transcript_072481;Transcript_096227
ko05213	Endometrial_cancer	4	5.43682e-05	Transcript_047623;Transcript_156614;Transcript_199440;Transcript_242230
GO:0034399	C:nuclear_periphery	4	0.00568633	Transcript_181291;Transcript_211082;Transcript_214753;Transcript_244446
GO:0016717	F:oxidoreductase_activity,_acting_on_paired_donors,_with_oxidation_of_a_pair_of_donors_resulting_in_the_reduction_of_molecular_oxygen_to_two_molecules_of_water	4	0.00127118	Transcript_043427;Transcript_046635;Transcript_049793;Transcript_152573
GO:0030532	C:small_nuclear_ribonucleoprotein_complex	4	0.0189709	Transcript_197498;Transcript_200884;Transcript_213172;Transcript_244667
GO:0045732	P:positive_regulation_of_protein_catabolic_process	4	0.268631	Transcript_031964;Transcript_096112;Transcript_109160;Transcript_146566
GO:0000381	P:regulation_of_alternative_mRNA_splicing,_via_spliceosome	3	3.04167e-05	Transcript_012893;Transcript_015286;Transcript_200884
GO:1902395	P:regulation_of_1-deoxy-D-xylulose-5-phosphate_synthase_activity	3	1	Transcript_028741;Transcript_149152;Transcript_188321
GO:0051092	P:positive_regulation_of_NF-kappaB_transcription_factor_activity	3	0.639655	Transcript_004120;Transcript_019423;Transcript_211140
GO:0030570	F:pectate_lyase_activity	3	5.55923e-06	Transcript_010133;Transcript_067062;Transcript_238278
GO:0015706	P:nitrate_transport	3	0.0440712	Transcript_042788;Transcript_164586;Transcript_193595
GO:0010388	P:cullin_deneddylation	3	0.000297138	Transcript_033998;Transcript_073836;Transcript_099676
ko04976	Bile_secretion	3	7.53678e-07	Transcript_149692;Transcript_225665;Transcript_236713
GO:0019752	P:carboxylic_acid_metabolic_process	3	0.102428	Transcript_023489;Transcript_031038;Transcript_031557
GO:0033730	F:arogenate_dehydrogenase_(NADP+)_activity	3	0.507495	Transcript_006354;Transcript_100682;Transcript_176543
GO:0000462	P:maturation_of_SSU-rRNA_from_tricistronic_rRNA_transcript_(SSU-rRNA,_5.8S_rRNA,_LSU-rRNA)	3	0.00105645	Transcript_100674;Transcript_127726;Transcript_234329
GO:0031145	P:anaphase-promoting_complex-dependent_proteasomal_ubiquitin-dependent_protein_catabolic_process	3	0.00200913	Transcript_033497;Transcript_044220;Transcript_186885
GO:0005861	C:troponin_complex_	3	0.394088	Transcript_002541;Transcript_042201;Transcript_173291
GO:0006032	P:chitin_catabolic_process	3	1.53829e-05	Transcript_006062;Transcript_038930;Transcript_204757
GO:0045879	P:negative_regulation_of_smoothened_signaling_pathway	3	1	Transcript_036517;Transcript_178296;Transcript_233011
GO:0004042	F:acetyl-CoA:L-glutamate_N-acetyltransferase_activity	3	0.180857	Transcript_002106;Transcript_156069;Transcript_199699
GO:0004310	F:farnesyl-diphosphate_farnesyltransferase_activity	3	0.303584	Transcript_045549;Transcript_155438;Transcript_228961
GO:0036402	F:proteasome-activating_ATPase_activity	3	0.00105645	Transcript_153990;Transcript_174497;Transcript_208673
GO:0035307	P:positive_regulation_of_protein_dephosphorylation	3	1	Transcript_005547;Transcript_018911;Transcript_041445
GO:0031929	P:TOR_signaling	3	0.00999993	Transcript_021276;Transcript_221971;Transcript_228274
GO:0030267	F:glyoxylate_reductase_(NADP)_activity	3	0.180857	Transcript_035652;Transcript_100833;Transcript_209355
GO:0018459	F:carveol_dehydrogenase_activity	3	1	Transcript_158900;Transcript_195568;Transcript_199782
GO:0017022	F:myosin_binding	3	0.0573212	Transcript_014610;Transcript_231027;Transcript_240208
GO:0007005	P:mitochondrion_organization	3	1.06646e-06	Transcript_007693;Transcript_009092;Transcript_117260
GO:0043186	C:P_granule	3	0.507495	Transcript_006512;Transcript_015664;Transcript_087162
GO:0004660	F:protein_farnesyltransferase_activity	3	1	Transcript_046543;Transcript_167869;Transcript_222618
GO:0031204	P:posttranslational_protein_targeting_to_membrane,_translocation	3	0.0573212	Transcript_008257;Transcript_196849;Transcript_197117
GO:0000326	C:protein_storage_vacuole	3	0.00277124	Transcript_025024;Transcript_046718;Transcript_198258
GO:0035198	F:miRNA_binding	3	0.180857	Transcript_079355;Transcript_176851;Transcript_225407
GO:0018991	P:oviposition	3	0.507495	Transcript_035258;Transcript_069308;Transcript_117260
GO:0017070	F:U6_snRNA_binding	3	0.00999993	Transcript_006686;Transcript_150591;Transcript_183966
GO:0009560	P:embryo_sac_egg_cell_differentiation	3	0.180857	Transcript_006686;Transcript_183966;Transcript_186407
GO:0010208	P:pollen_wall_assembly	3	0.0129354	Transcript_040020;Transcript_149410;Transcript_237818
GO:0008725	F:DNA-3-methyladenine_glycosylase_activity_	3	0.0129354	Transcript_012317;Transcript_156756;Transcript_225942
GO:0031523	C:Myb_complex	3	1	Transcript_036517;Transcript_229005;Transcript_233011
GO:0006024	P:glycosaminoglycan_biosynthetic_process	3	0.102428	Transcript_017173;Transcript_029215;Transcript_150852
GO:0051225	P:spindle_assembly	3	0.102428	Transcript_008054;Transcript_033907;Transcript_197295
GO:0015977	P:carbon_fixation	3	0.0767063	Transcript_000495;Transcript_025008;Transcript_059044
GO:0030868	C:smooth_endoplasmic_reticulum_membrane	3	1	Transcript_020271;Transcript_023927;Transcript_187317
GO:0097502	P:mannosylation	3	2.1397e-06	Transcript_032760;Transcript_033196;Transcript_154436
ko01051	Biosynthesis_of_ansamycins	3	1	Transcript_034155;Transcript_058836;Transcript_216692
GO:0019953	P:sexual_reproduction	3	0.646509	Transcript_019739;Transcript_042164;Transcript_209163
GO:0055129	P:L-proline_biosynthetic_process	3	0.238603	Transcript_003307;Transcript_059679;Transcript_231972
GO:0006744	P:ubiquinone_biosynthetic_process	3	0.0129354	Transcript_035659;Transcript_126589;Transcript_131589
GO:0043596	C:nuclear_replication_fork	3	0.0440712	Transcript_012245;Transcript_065669;Transcript_164025
GO:0015175	F:neutral_amino_acid_transmembrane_transporter_activity	3	0.639655	Transcript_035838;Transcript_051885;Transcript_183390
GO:0051693	P:actin_filament_capping	3	0.00277124	Transcript_081056;Transcript_193252;Transcript_232900
GO:0030042	P:actin_filament_depolymerization	3	0.00105645	Transcript_032864;Transcript_088340;Transcript_190112
GO:0004843	F:ubiquitin-specific_protease_activity	3	2.77205e-10	Transcript_017909;Transcript_035414;Transcript_084750
GO:0000076	P:DNA_replication_checkpoint	3	0.762549	Transcript_117006;Transcript_156640;Transcript_224812
GO:0010067	P:procambium_histogenesis	3	0.102428	Transcript_041613;Transcript_093409;Transcript_240782
GO:0015140	F:malate_transmembrane_transporter_activity	3	0.136374	Transcript_000203;Transcript_043084;Transcript_196785
GO:0034641	P:cellular_nitrogen_compound_metabolic_process	3	0.00999993	Transcript_064226;Transcript_091674;Transcript_186885
GO:0052691	F:UDP-arabinopyranose_mutase_activity	3	0.394088	Transcript_011644;Transcript_161067;Transcript_231441
[truncated: 1,357 more rows]

## Sheet: GOCC
Category	Description	#Genes	pValue	#Genes
[truncated: 411 more rows]

[truncated: 2 more sheets: GOMF, GOBP]
