# Supplementary material for: Characterization of Transcriptome Dynamics during Early Fruit Development in Olive (Olea europaea L.)
Source: Int J Mol Sci. 2023 Jan 4;24(2):961. doi: 10.3390/ijms24020961 (PMC9864153; doi:10.3390/ijms24020961)
Supplement: Supplementary file 1 [file ijms-24-00961-s001.zip › Table S10_P14_vs_P0_DOWN_Functional_Enrichment.xlsx]

## Sheet: Functional_Enrichment
Supplementary Table S10. The enrichment analysis of GO terms based on down-regulated DEGs in the dividing fruits at 14 (P14) versus the flowers at anthesis stage (P0) during early olive fruit development.
Category	Description	#Genes	pValue	#Genes
GO:0000381	P:regulation_of_alternative_mRNA_splicing,_via_spliceosome	8	0.013035	Transcript_084707;Transcript_140909;Transcript_180291;Transcript_232658;Transcript_233986;Transcript_235884;Transcript_240874;Transcript_241984
GO:0004771	F:sterol_esterase_activity	3	0.165222	Transcript_005637;Transcript_122663;Transcript_236553
GO:0006285	P:base-excision_repair,_AP_site_formation	4	0.563109	Transcript_012325;Transcript_095546;Transcript_143674;Transcript_237865
GO:0010490	F:UDP-4-keto-rhamnose-4-keto-reductase_activity	4	1	Transcript_151232;Transcript_166028;Transcript_227002;Transcript_227041
GO:0008094	F:DNA-dependent_ATPase_activity	13	0.00783944	Transcript_000004;Transcript_009536;Transcript_019933;Transcript_022196;Transcript_068956;Transcript_078881;Transcript_097036;Transcript_161971;Transcript_199136;Transcript_237928;Transcript_240714;Transcript_242155;Transcript_244636
GO:0015846	P:polyamine_transport	2	0.456579	Transcript_225028;Transcript_243863
GO:0006537	P:glutamate_biosynthetic_process	2	1	Transcript_028047;Transcript_241733
GO:0043508	P:negative_regulation_of_JUN_kinase_activity	3	0.393222	Transcript_100239;Transcript_186430;Transcript_235573
GO:0009052	P:pentose-phosphate_shunt,_non-oxidative_branch	3	0.303101	Transcript_012253;Transcript_074726;Transcript_244002
ko04350	TGF-beta_signaling_pathway	15	1.46619e-05	Transcript_017223;Transcript_022136;Transcript_072106;Transcript_097747;Transcript_098438;Transcript_117496;Transcript_133924;Transcript_149141;Transcript_149776;Transcript_223900;Transcript_227790;Transcript_230696;Transcript_230723;Transcript_230739;Transcript_234354
GO:0009944	P:polarity_specification_of_adaxial/abaxial_axis	17	0.0301509	Transcript_000262;Transcript_023646;Transcript_023932;Transcript_030458;Transcript_042145;Transcript_042344;Transcript_042637;Transcript_085304;Transcript_092175;Transcript_105037;Transcript_143279;Transcript_155267;Transcript_211107;Transcript_213214;Transcript_226198;Transcript_228710;Transcript_236419
GO:0000991	F:core_RNA_polymerase_II_binding_transcription_factor_activity	4	0.316916	Transcript_023060;Transcript_026538;Transcript_041304;Transcript_233266
GO:0004558	F:alpha-1,4-glucosidase_activity_	4	0.0102776	Transcript_003205;Transcript_006647;Transcript_020755;Transcript_188406
GO:0032450	F:maltose_alpha-glucosidase_activity	2	0.00163947	Transcript_003205;Transcript_006647
GO:0030091	P:protein_repair	9	0.555674	Transcript_005422;Transcript_009306;Transcript_013325;Transcript_019419;Transcript_025797;Transcript_101128;Transcript_190389;Transcript_209512;Transcript_233152
GO:0015183	F:L-aspartate_transmembrane_transporter_activity	3	0.527991	Transcript_009968;Transcript_201742;Transcript_236224
GO:0006139	P:nucleobase-containing_compound_metabolic_process	2	1	Transcript_042433;Transcript_235160
GO:0016131	P:brassinosteroid_metabolic_process	2	1	Transcript_008307;Transcript_041372
GO:0047912	F:galacturonokinase_activity	2	0.281171	Transcript_018508;Transcript_187407
GO:0004320	F:oleoyl-acyl-carrier-protein_hydrolase_activity	4	1	Transcript_066148;Transcript_127755;Transcript_155023;Transcript_189857
GO:0048102	P:autophagic_cell_death	4	0.0427763	Transcript_005422;Transcript_188629;Transcript_202796;Transcript_239319
GO:0009143	P:nucleoside_triphosphate_catabolic_process	2	1	Transcript_008093;Transcript_181901
GO:0030336	P:negative_regulation_of_cell_migration	8	1	Transcript_004615;Transcript_035784;Transcript_040488;Transcript_112814;Transcript_143707;Transcript_151752;Transcript_230437;Transcript_239898
GO:1902456	P:regulation_of_stomatal_opening	3	0.471648	Transcript_020078;Transcript_047563;Transcript_165741
GO:0008284	P:positive_regulation_of_cell_proliferation	12	4.0714e-05	Transcript_018802;Transcript_057067;Transcript_100318;Transcript_133333;Transcript_177606;Transcript_181957;Transcript_186430;Transcript_220365;Transcript_223390;Transcript_230792;Transcript_233890;Transcript_235443
GO:0045747	P:positive_regulation_of_Notch_signaling_pathway	3	0.237067	Transcript_008889;Transcript_024356;Transcript_198346
GO:0034314	P:Arp2/3_complex-mediated_actin_nucleation	5	0.00337279	Transcript_005372;Transcript_026710;Transcript_116920;Transcript_197714;Transcript_232904
GO:0030301	P:cholesterol_transport	3	1	Transcript_232616;Transcript_239058;Transcript_240271
GO:0004818	F:glutamate-tRNA_ligase_activity	4	0.676899	Transcript_013606;Transcript_231713;Transcript_238472;Transcript_240422
GO:0030570	F:pectate_lyase_activity	10	0.0239681	Transcript_004994;Transcript_009442;Transcript_031667;Transcript_045339;Transcript_052528;Transcript_054574;Transcript_055480;Transcript_152498;Transcript_166270;Transcript_199197
GO:0006265	P:DNA_topological_change	6	0.0506771	Transcript_018957;Transcript_033085;Transcript_124227;Transcript_223303;Transcript_236631;Transcript_238442
GO:0006122	P:mitochondrial_electron_transport,_ubiquinol_to_cytochrome_c	11	0.0141818	Transcript_043609;Transcript_068384;Transcript_076030;Transcript_102552;Transcript_183007;Transcript_225706;Transcript_227909;Transcript_232733;Transcript_233724;Transcript_236953;Transcript_238465
ko05210	Colorectal_cancer	24	0.101165	Transcript_004137;Transcript_013798;Transcript_019041;Transcript_021853;Transcript_024575;Transcript_033023;Transcript_043118;Transcript_058863;Transcript_072106;Transcript_150338;Transcript_150886;Transcript_161971;Transcript_162158;Transcript_172586;Transcript_207470;Transcript_223900;Transcript_224126;Transcript_230020;Transcript_230696;Transcript_231953;Transcript_236061;Transcript_239220;Tra…
GO:0080005	P:photosystem_stoichiometry_adjustment	2	1	Transcript_043974;Transcript_146450
GO:0006612	P:protein_targeting_to_membrane	16	0.23918	Transcript_003076;Transcript_005159;Transcript_013466;Transcript_024829;Transcript_048938;Transcript_075386;Transcript_130283;Transcript_163023;Transcript_167861;Transcript_170567;Transcript_184641;Transcript_218928;Transcript_225061;Transcript_227469;Transcript_230080;Transcript_241253
GO:0000184	P:nuclear-transcribed_mRNA_catabolic_process,_nonsense-mediated_decay	22	0.005855	Transcript_006068;Transcript_017203;Transcript_031071;Transcript_041366;Transcript_078992;Transcript_091825;Transcript_152432;Transcript_172782;Transcript_180291;Transcript_185594;Transcript_202974;Transcript_219169;Transcript_222902;Transcript_225194;Transcript_227301;Transcript_227824;Transcript_229192;Transcript_230155;Transcript_232658;Transcript_238925;Transcript_240874;Transcript_241862
GO:0050897	F:cobalt_ion_binding	22	0.339613	Transcript_012761;Transcript_042883;Transcript_056969;Transcript_087227;Transcript_098214;Transcript_141694;Transcript_159265;Transcript_166507;Transcript_187917;Transcript_188146;Transcript_189781;Transcript_195099;Transcript_211261;Transcript_223224;Transcript_223413;Transcript_225021;Transcript_227997;Transcript_228174;Transcript_229482;Transcript_230646;Transcript_233252;Transcript_235685
GO:0006970	P:response_to_osmotic_stress	58	1.32575e-06	Transcript_001411;Transcript_002622;Transcript_004543;Transcript_007729;Transcript_008148;Transcript_012848;Transcript_013144;Transcript_013227;Transcript_013501;Transcript_014893;Transcript_018199;Transcript_021167;Transcript_031083;Transcript_031525;Transcript_031856;Transcript_034137;Transcript_043411;Transcript_043939;Transcript_047563;Transcript_061214;Transcript_071991;Transcript_089035;Tra…
GO:0009113	P:purine_nucleobase_biosynthetic_process	5	1	Transcript_004749;Transcript_010202;Transcript_155159;Transcript_201923;Transcript_209747
GO:0015706	P:nitrate_transport	9	1	Transcript_000586;Transcript_005356;Transcript_018501;Transcript_029459;Transcript_043022;Transcript_062728;Transcript_150885;Transcript_165857;Transcript_233511
GO:0004317	F:3-hydroxypalmitoyl-acyl-carrier-protein_dehydratase_activity	4	0.79695	Transcript_066148;Transcript_127755;Transcript_155023;Transcript_189857
GO:0004534	F:5'-3'_exoribonuclease_activity	4	0.211787	Transcript_101603;Transcript_137939;Transcript_235902;Transcript_242249
GO:0010388	P:cullin_deneddylation	12	0.520868	Transcript_010727;Transcript_015917;Transcript_023280;Transcript_026468;Transcript_038794;Transcript_076125;Transcript_104775;Transcript_229494;Transcript_230754;Transcript_232277;Transcript_241383;Transcript_244041
GO:0070509	P:calcium_ion_import	2	0.776635	Transcript_107188;Transcript_227906
GO:0034602	F:oxoglutarate_dehydrogenase_(NAD+)_activity	2	0.281171	Transcript_053448;Transcript_097665
GO:0009044	F:xylan_1,4-beta-xylosidase_activity	3	0.0793094	Transcript_019000;Transcript_029356;Transcript_096281
GO:0052747	F:sinapyl_alcohol_dehydrogenase_activity	2	0.190669	Transcript_079173;Transcript_137673
GO:0004106	F:chorismate_mutase_activity	2	0.602246	Transcript_153648;Transcript_154084
GO:0005960	C:glycine_cleavage_complex_	3	0.135649	Transcript_166748;Transcript_170047;Transcript_184206
GO:0010262	P:somatic_embryogenesis	2	0.456579	Transcript_019779;Transcript_209684
GO:0031982	C:vesicle	2	0.595334	Transcript_186430;Transcript_239058
GO:0003697	F:single-stranded_DNA_binding	25	0.000126787	Transcript_004862;Transcript_007997;Transcript_009536;Transcript_012092;Transcript_014421;Transcript_016098;Transcript_019041;Transcript_022196;Transcript_031480;Transcript_035630;Transcript_043877;Transcript_069962;Transcript_087535;Transcript_096279;Transcript_163281;Transcript_171266;Transcript_176525;Transcript_195032;Transcript_222509;Transcript_224299;Transcript_225772;Transcript_233679;Tra…
GO:0042331	P:phototaxis	2	1	Transcript_170217;Transcript_229224
ko04976	Bile_secretion	16	0.203446	Transcript_012981;Transcript_032581;Transcript_036881;Transcript_059532;Transcript_081200;Transcript_084504;Transcript_148175;Transcript_150662;Transcript_151834;Transcript_183936;Transcript_186151;Transcript_200150;Transcript_222312;Transcript_234332;Transcript_235363;Transcript_237078
GO:0031936	P:negative_regulation_of_chromatin_silencing	5	0.409328	Transcript_017511;Transcript_161801;Transcript_224103;Transcript_238771;Transcript_240558
GO:0043066	P:negative_regulation_of_apoptotic_process	25	0.000126787	Transcript_009517;Transcript_013534;Transcript_025633;Transcript_044013;Transcript_044323;Transcript_057948;Transcript_059889;Transcript_100239;Transcript_102814;Transcript_138761;Transcript_149157;Transcript_156653;Transcript_172586;Transcript_175468;Transcript_183236;Transcript_201775;Transcript_225125;Transcript_225231;Transcript_226879;Transcript_230735;Transcript_234404;Transcript_235573;Tra…
GO:0000989	F:transcription_factor_binding_transcription_factor_activity	6	1	Transcript_007511;Transcript_022712;Transcript_035321;Transcript_215308;Transcript_227225;Transcript_241686
GO:0006850	P:mitochondrial_pyruvate_transport	2	0.190669	Transcript_174377;Transcript_226925
ko00364	Fluorobenzoate_degradation	2	0.776635	Transcript_034463;Transcript_171265
GO:0051117	F:ATPase_binding	7	0.0232054	Transcript_087040;Transcript_158005;Transcript_196053;Transcript_222588;Transcript_230173;Transcript_231016;Transcript_240246
GO:0034450	F:ubiquitin-ubiquitin_ligase_activity	3	0.0765394	Transcript_008382;Transcript_192690;Transcript_225631
GO:0009073	P:aromatic_amino_acid_family_biosynthetic_process	15	0.000317762	Transcript_006888;Transcript_007002;Transcript_043890;Transcript_072021;Transcript_121188;Transcript_137532;Transcript_153648;Transcript_154084;Transcript_155915;Transcript_178011;Transcript_187987;Transcript_235566;Transcript_236059;Transcript_240170;Transcript_241827
GO:0036112	P:medium-chain_fatty-acyl-CoA_metabolic_process	2	0.281171	Transcript_186294;Transcript_206123
GO:1901679	P:nucleotide_transmembrane_transport	3	0.25427	Transcript_023429;Transcript_089910;Transcript_140672
GO:0015786	P:UDP-glucose_transport	8	0.451697	Transcript_024551;Transcript_061254;Transcript_090987;Transcript_105150;Transcript_156020;Transcript_215450;Transcript_235645;Transcript_236983
GO:0000228	C:nuclear_chromosome	11	0.0994174	Transcript_126991;Transcript_161971;Transcript_165300;Transcript_177064;Transcript_208085;Transcript_234350;Transcript_236631;Transcript_237009;Transcript_237928;Transcript_241251;Transcript_242155
GO:0019752	P:carboxylic_acid_metabolic_process	3	0.102019	Transcript_018296;Transcript_229628;Transcript_234592
ko04212	Longevity_regulating_pathway_-_worm	51	0.00123629	Transcript_004598;Transcript_004615;Transcript_004823;Transcript_006675;Transcript_008002;Transcript_023059;Transcript_025019;Transcript_030798;Transcript_035784;Transcript_039926;Transcript_041429;Transcript_041759;Transcript_043882;Transcript_056969;Transcript_059638;Transcript_081872;Transcript_082965;Transcript_085990;Transcript_093691;Transcript_096671;Transcript_098214;Transcript_104899;Tra…
ko03010	Ribosome	225	4.5108e-20	Transcript_000250;Transcript_000260;Transcript_002218;Transcript_002555;Transcript_004360;Transcript_004690;Transcript_004748;Transcript_005881;Transcript_006817;Transcript_007059;Transcript_007166;Transcript_007649;Transcript_007868;Transcript_009546;Transcript_012072;Transcript_012128;Transcript_013242;Transcript_013258;Transcript_013656;Transcript_014005;Transcript_014241;Transcript_014993;Tra…
GO:2000762	P:regulation_of_phenylpropanoid_metabolic_process	5	0.300018	Transcript_017524;Transcript_167063;Transcript_198557;Transcript_237053;Transcript_242305
GO:0008324	F:cation_transmembrane_transporter_activity	4	0.00762391	Transcript_006877;Transcript_187754;Transcript_196622;Transcript_228469
GO:0019899	F:enzyme_binding	10	0.00033779	Transcript_015618;Transcript_038714;Transcript_126726;Transcript_160054;Transcript_206423;Transcript_229927;Transcript_232616;Transcript_234525;Transcript_238765;Transcript_241343
GO:0033730	F:arogenate_dehydrogenase_(NADP+)_activity	4	0.825415	Transcript_014426;Transcript_041699;Transcript_076134;Transcript_128204
ko04915	Estrogen_signaling_pathway	15	0.00215698	Transcript_005780;Transcript_016710;Transcript_018125;Transcript_022279;Transcript_024575;Transcript_033023;Transcript_069212;Transcript_069862;Transcript_072106;Transcript_170584;Transcript_189001;Transcript_193507;Transcript_223900;Transcript_230696;Transcript_232898
GO:0000462	P:maturation_of_SSU-rRNA_from_tricistronic_rRNA_transcript_(SSU-rRNA,_5.8S_rRNA,_LSU-rRNA)	9	0.275119	Transcript_028329;Transcript_050447;Transcript_103214;Transcript_142032;Transcript_169159;Transcript_170854;Transcript_200889;Transcript_221863;Transcript_228725
GO:0000395	P:mRNA_5'-splice_site_recognition	2	0.595334	Transcript_052231;Transcript_206989
GO:0030244	P:cellulose_biosynthetic_process	46	0.00141021	Transcript_005015;Transcript_009608;Transcript_011648;Transcript_014494;Transcript_014722;Transcript_014866;Transcript_015198;Transcript_020976;Transcript_025076;Transcript_028033;Transcript_029920;Transcript_032955;Transcript_039734;Transcript_043816;Transcript_047682;Transcript_055002;Transcript_067951;Transcript_074217;Transcript_091788;Transcript_096283;Transcript_132593;Transcript_136908;Tra…
GO:0008210	P:estrogen_metabolic_process	2	0.406345	Transcript_186294;Transcript_206123
ko00261	Monobactam_biosynthesis	2	0.000158527	Transcript_014765;Transcript_098122
GO:0000776	C:kinetochore	5	0.041257	Transcript_002482;Transcript_060502;Transcript_151113;Transcript_155446;Transcript_236051
GO:0000922	C:spindle_pole	7	0.000681759	Transcript_002427;Transcript_012934;Transcript_028330;Transcript_029875;Transcript_195640;Transcript_225968;Transcript_228126
GO:0009739	P:response_to_gibberellin	29	0.0230816	Transcript_007511;Transcript_012159;Transcript_016940;Transcript_022712;Transcript_031856;Transcript_035321;Transcript_041608;Transcript_049607;Transcript_080059;Transcript_081091;Transcript_096297;Transcript_156947;Transcript_157816;Transcript_158984;Transcript_159892;Transcript_175089;Transcript_191377;Transcript_204611;Transcript_212745;Transcript_215308;Transcript_224426;Transcript_225510;Tra…
GO:0007088	P:regulation_of_mitotic_nuclear_division	3	0.393222	Transcript_186849;Transcript_226246;Transcript_229190
GO:0010472	F:GDP-galactose:glucose-1-phosphate_guanylyltransferase_activity	2	0.105779	Transcript_166916;Transcript_233591
GO:0019789	F:SUMO_transferase_activity	6	0.213234	Transcript_003093;Transcript_014166;Transcript_017867;Transcript_044143;Transcript_057067;Transcript_227735
GO:0046523	F:S-methyl-5-thioribose-1-phosphate_isomerase_activity	4	1	Transcript_016719;Transcript_079869;Transcript_108262;Transcript_225415
GO:0050334	F:thiaminase_activity_	2	0.154885	Transcript_176458;Transcript_203566
GO:0031145	P:anaphase-promoting_complex-dependent_proteasomal_ubiquitin-dependent_protein_catabolic_process	6	0.0506771	Transcript_007259;Transcript_103584;Transcript_117708;Transcript_158365;Transcript_225125;Transcript_243514
GO:0030529	C:ribonucleoprotein_complex	42	3.2757e-05	Transcript_003321;Transcript_006115;Transcript_008332;Transcript_008644;Transcript_013172;Transcript_015725;Transcript_018184;Transcript_023301;Transcript_023930;Transcript_028771;Transcript_028957;Transcript_041742;Transcript_042783;Transcript_069210;Transcript_078006;Transcript_100702;Transcript_135419;Transcript_152499;Transcript_152576;Transcript_165432;Transcript_172586;Transcript_177337;Tra…
GO:0051301	P:cell_division	148	7.03871e-19	Transcript_001411;Transcript_002736;Transcript_003093;Transcript_003467;Transcript_005533;Transcript_006445;Transcript_007259;Transcript_007510;Transcript_007537;Transcript_007581;Transcript_008282;Transcript_008465;Transcript_008964;Transcript_008971;Transcript_009156;Transcript_011213;Transcript_013227;Transcript_014718;Transcript_015116;Transcript_016485;Transcript_017235;Transcript_018145;Tra…
GO:0015450	F:P-P-bond-hydrolysis-driven_protein_transmembrane_transporter_activity	16	0.280171	Transcript_025843;Transcript_029507;Transcript_032072;Transcript_043882;Transcript_054119;Transcript_061221;Transcript_081872;Transcript_099524;Transcript_101834;Transcript_137168;Transcript_150319;Transcript_160119;Transcript_180143;Transcript_181292;Transcript_199414;Transcript_234211
GO:0016514	C:SWI/SNF_complex	2	0.0565074	Transcript_046871;Transcript_148637
GO:0008375	F:acetylglucosaminyltransferase_activity	5	0.810889	Transcript_032994;Transcript_161886;Transcript_227762;Transcript_228074;Transcript_237268
GO:0003690	F:double-stranded_DNA_binding	11	0.00551912	Transcript_017180;Transcript_017932;Transcript_027789;Transcript_031480;Transcript_044536;Transcript_189892;Transcript_205398;Transcript_222509;Transcript_225772;Transcript_240207;Transcript_240523
GO:0005861	C:troponin_complex_	3	0.393222	Transcript_036623;Transcript_043186;Transcript_180285
GO:0010370	C:perinucleolar_chromocenter	2	0.695033	Transcript_126726;Transcript_241343
GO:0048471	C:perinuclear_region_of_cytoplasm	41	2.28375e-06	Transcript_001635;Transcript_002482;Transcript_002621;Transcript_008597;Transcript_015058;Transcript_016742;Transcript_017948;Transcript_019663;Transcript_039481;Transcript_041161;Transcript_043848;Transcript_047081;Transcript_082760;Transcript_089910;Transcript_095355;Transcript_107188;Transcript_108981;Transcript_137297;Transcript_137349;Transcript_152576;Transcript_157714;Transcript_159752;Tra…
GO:0004022	F:alcohol_dehydrogenase_(NAD)_activity	9	0.00763852	Transcript_030584;Transcript_045602;Transcript_090011;Transcript_104646;Transcript_111081;Transcript_226703;Transcript_228968;Transcript_234046;Transcript_242401
GO:0006626	P:protein_targeting_to_mitochondrion	12	0.323105	Transcript_017180;Transcript_043882;Transcript_044536;Transcript_045189;Transcript_081872;Transcript_087523;Transcript_095555;Transcript_099524;Transcript_137168;Transcript_162925;Transcript_181292;Transcript_210135
GO:0006857	P:oligopeptide_transport	13	0.0291047	Transcript_007088;Transcript_009090;Transcript_014004;Transcript_014822;Transcript_018501;Transcript_030771;Transcript_036186;Transcript_141440;Transcript_183177;Transcript_204984;Transcript_229023;Transcript_233511;Transcript_238699
GO:0008203	P:cholesterol_metabolic_process	12	1	Transcript_012922;Transcript_025013;Transcript_032704;Transcript_042652;Transcript_084987;Transcript_150018;Transcript_157271;Transcript_183936;Transcript_232616;Transcript_239058;Transcript_240271;Transcript_241906
GO:0015207	F:adenine_transmembrane_transporter_activity	3	0.7609	Transcript_015491;Transcript_023143;Transcript_029355
GO:0050203	F:oxalate-CoA_ligase_activity	3	0.527991	Transcript_035463;Transcript_237996;Transcript_243337
GO:0032543	P:mitochondrial_translation	17	0.444515	Transcript_015910;Transcript_016986;Transcript_023437;Transcript_028545;Transcript_032958;Transcript_033251;Transcript_056320;Transcript_094947;Transcript_104420;Transcript_108013;Transcript_125255;Transcript_179288;Transcript_193305;Transcript_204786;Transcript_230086;Transcript_230793;Transcript_242477
GO:0043022	F:ribosome_binding	19	0.000215408	Transcript_007789;Transcript_009359;Transcript_025609;Transcript_028397;Transcript_029376;Transcript_029507;Transcript_044323;Transcript_051509;Transcript_059275;Transcript_110725;Transcript_143419;Transcript_150319;Transcript_151486;Transcript_160345;Transcript_167485;Transcript_213035;Transcript_230393;Transcript_236570;Transcript_236593
GO:0071217	P:cellular_response_to_external_biotic_stimulus	7	0.352837	Transcript_042145;Transcript_042637;Transcript_043973;Transcript_085304;Transcript_105037;Transcript_230857;Transcript_242771
GO:0004516	F:nicotinate_phosphoribosyltransferase_activity	3	0.237067	Transcript_033039;Transcript_100250;Transcript_175678
GO:0031591	P:wybutosine_biosynthetic_process	2	0.281171	Transcript_082284;Transcript_174562
GO:0032587	C:ruffle_membrane	2	0.776635	Transcript_003872;Transcript_229190
GO:0033512	P:L-lysine_catabolic_process_to_acetyl-CoA_via_saccharopine	5	0.0323053	Transcript_041416;Transcript_085286;Transcript_160957;Transcript_185618;Transcript_223367
GO:0006032	P:chitin_catabolic_process	7	0.00362049	Transcript_032979;Transcript_077638;Transcript_096837;Transcript_149601;Transcript_155035;Transcript_180664;Transcript_224207
GO:0010117	P:photoprotection	6	0.600422	Transcript_001458;Transcript_017733;Transcript_094361;Transcript_235722;Transcript_238850;Transcript_239693
GO:0046933	F:proton-transporting_ATP_synthase_activity,_rotational_mechanism	14	3.18e-05	Transcript_002006;Transcript_012787;Transcript_017330;Transcript_034232;Transcript_040111;Transcript_044692;Transcript_084692;Transcript_085172;Transcript_092111;Transcript_182662;Transcript_205374;Transcript_207464;Transcript_226819;Transcript_232683
GO:0035650	F:AP-1_adaptor_complex_binding	2	0.154885	Transcript_017876;Transcript_173643
GO:0042590	P:antigen_processing_and_presentation_of_exogenous_peptide_antigen_via_MHC_class_I	3	0.102019	Transcript_225125;Transcript_225622;Transcript_226324
GO:0034599	P:cellular_response_to_oxidative_stress	20	0.0226836	Transcript_002210;Transcript_005422;Transcript_014604;Transcript_020481;Transcript_022674;Transcript_025797;Transcript_033053;Transcript_035630;Transcript_039086;Transcript_043306;Transcript_067433;Transcript_087369;Transcript_103151;Transcript_156926;Transcript_184360;Transcript_209512;Transcript_222162;Transcript_227389;Transcript_227621;Transcript_229930
GO:0016104	P:triterpenoid_biosynthetic_process	2	0.154885	Transcript_026240;Transcript_223701
GO:0071006	C:U2-type_catalytic_step_1_spliceosome	3	1	Transcript_043216;Transcript_049461;Transcript_184384
GO:0043278	P:response_to_morphine	2	1	Transcript_197384;Transcript_240445
GO:0009723	P:response_to_ethylene	52	0.00133094	Transcript_002815;Transcript_007992;Transcript_012848;Transcript_014893;Transcript_016400;Transcript_016940;Transcript_018996;Transcript_019242;Transcript_028353;Transcript_028584;Transcript_029473;Transcript_030911;Transcript_033252;Transcript_035826;Transcript_038402;Transcript_063233;Transcript_071303;Transcript_076729;Transcript_080393;Transcript_080417;Transcript_090430;Transcript_096297;Tra…
GO:0006891	P:intra-Golgi_vesicle-mediated_transport	11	0.000726201	Transcript_000897;Transcript_004453;Transcript_008404;Transcript_033802;Transcript_039015;Transcript_099027;Transcript_161644;Transcript_227642;Transcript_235922;Transcript_238501;Transcript_240790
GO:0035252	F:UDP-xylosyltransferase_activity	5	0.300018	Transcript_009214;Transcript_107630;Transcript_165735;Transcript_175920;Transcript_205685
GO:0035336	P:long-chain_fatty-acyl-CoA_metabolic_process	6	0.600422	Transcript_039926;Transcript_164643;Transcript_195353;Transcript_231182;Transcript_232700;Transcript_241795
GO:0016197	P:endosomal_transport	8	0.309922	Transcript_045692;Transcript_093969;Transcript_098313;Transcript_159476;Transcript_211725;Transcript_231906;Transcript_233235;Transcript_238423
GO:0004042	F:acetyl-CoA:L-glutamate_N-acetyltransferase_activity	5	0.571511	Transcript_008700;Transcript_015673;Transcript_044407;Transcript_082650;Transcript_150631
GO:0004435	F:phosphatidylinositol_phospholipase_C_activity	4	0.27286	Transcript_140517;Transcript_154268;Transcript_174975;Transcript_236155
GO:0004525	F:ribonuclease_III_activity	4	0.00171038	Transcript_000262;Transcript_019157;Transcript_124826;Transcript_241693
GO:0009570	C:chloroplast_stroma	235	6.98576e-27	Transcript_001527;Transcript_001574;Transcript_002210;Transcript_002658;Transcript_002738;Transcript_003002;Transcript_003099;Transcript_003141;Transcript_003467;Transcript_003860;Transcript_004377;Transcript_004598;Transcript_004749;Transcript_004822;Transcript_005159;Transcript_006635;Transcript_007649;Transcript_007719;Transcript_008002;Transcript_008332;Transcript_009141;Transcript_009143;Tra…
GO:0016688	F:L-ascorbate_peroxidase_activity	5	0.0323053	Transcript_092161;Transcript_155200;Transcript_226289;Transcript_235466;Transcript_239172
GO:0006526	P:arginine_biosynthetic_process	8	0.0272677	Transcript_008700;Transcript_015673;Transcript_015937;Transcript_044407;Transcript_082650;Transcript_121073;Transcript_150631;Transcript_160105
GO:0006313	P:transposition,_DNA-mediated	4	0.433453	Transcript_144762;Transcript_150625;Transcript_241068;Transcript_241747
GO:0071483	P:cellular_response_to_blue_light	6	0.716775	Transcript_001458;Transcript_017199;Transcript_094361;Transcript_188379;Transcript_208023;Transcript_230001
GO:0009705	C:plant-type_vacuole_membrane	66	9.70868e-05	Transcript_000586;Transcript_002649;Transcript_007088;Transcript_009157;Transcript_009459;Transcript_011491;Transcript_011837;Transcript_014043;Transcript_017321;Transcript_017678;Transcript_019131;Transcript_020502;Transcript_023308;Transcript_025134;Transcript_025532;Transcript_028513;Transcript_029334;Transcript_030536;Transcript_037099;Transcript_042995;Transcript_045266;Transcript_053513;Tra…
GO:0003855	F:3-dehydroquinate_dehydratase_activity	3	0.805419	Transcript_121188;Transcript_178011;Transcript_240170
GO:0047268	F:galactinol-raffinose_galactosyltransferase_activity	3	0.645282	Transcript_150401;Transcript_178757;Transcript_229176
GO:0042277	F:peptide_binding	15	0.00136781	Transcript_007564;Transcript_039672;Transcript_051541;Transcript_099811;Transcript_137483;Transcript_146634;Transcript_170739;Transcript_174430;Transcript_177856;Transcript_196830;Transcript_217324;Transcript_225822;Transcript_231676;Transcript_240003;Transcript_243223
GO:0004310	F:farnesyl-diphosphate_farnesyltransferase_activity	2	0.14426	Transcript_029284;Transcript_242879
GO:0017134	F:fibroblast_growth_factor_binding	2	0.281171	Transcript_057948;Transcript_175468
GO:0006400	P:tRNA_modification	10	0.489639	Transcript_018802;Transcript_023025;Transcript_039162;Transcript_077173;Transcript_124970;Transcript_166034;Transcript_225050;Transcript_226086;Transcript_238759;Transcript_239518
GO:0036289	P:peptidyl-serine_autophosphorylation	2	1	Transcript_006433;Transcript_008465
GO:0034620	P:cellular_response_to_unfolded_protein	7	0.519278	Transcript_038590;Transcript_062597;Transcript_178079;Transcript_185108;Transcript_226719;Transcript_227998;Transcript_243848
GO:0036402	F:proteasome-activating_ATPase_activity	4	0.00593063	Transcript_070040;Transcript_233934;Transcript_234735;Transcript_240819
GO:0032008	P:positive_regulation_of_TOR_signaling	2	0.776635	Transcript_044030;Transcript_091277
GO:0080178	P:5-carbamoylmethyluridine_metabolic_process	2	0.456579	Transcript_018802;Transcript_226086
GO:0003333	P:amino_acid_transmembrane_transport	19	0.000560569	Transcript_009632;Transcript_009968;Transcript_015355;Transcript_027091;Transcript_042885;Transcript_094165;Transcript_097145;Transcript_103108;Transcript_170196;Transcript_191348;Transcript_201742;Transcript_203753;Transcript_222474;Transcript_226922;Transcript_231171;Transcript_234323;Transcript_235231;Transcript_236224;Transcript_239841
GO:0009411	P:response_to_UV	23	0.624242	Transcript_029392;Transcript_035642;Transcript_043511;Transcript_153995;Transcript_161971;Transcript_166381;Transcript_186066;Transcript_186849;Transcript_188899;Transcript_193452;Transcript_194992;Transcript_204242;Transcript_223070;Transcript_230620;Transcript_231215;Transcript_231330;Transcript_233807;Transcript_233833;Transcript_233890;Transcript_237928;Transcript_241393;Transcript_242155;Tra…
GO:0046481	F:digalactosyldiacylglycerol_synthase_activity	2	1	Transcript_128925;Transcript_172453
GO:0008762	F:UDP-N-acetylmuramate_dehydrogenase_activity	16	0.00624637	Transcript_009542;Transcript_042960;Transcript_047156;Transcript_116042;Transcript_133357;Transcript_148881;Transcript_150051;Transcript_157199;Transcript_160706;Transcript_192766;Transcript_199767;Transcript_201752;Transcript_224752;Transcript_228178;Transcript_235183;Transcript_237637
ko00982	Drug_metabolism_-_cytochrome_P450	19	0.0438346	Transcript_009143;Transcript_011203;Transcript_030584;Transcript_043008;Transcript_045584;Transcript_062429;Transcript_090011;Transcript_111081;Transcript_161374;Transcript_168471;Transcript_183522;Transcript_209211;Transcript_223618;Transcript_226159;Transcript_228968;Transcript_236226;Transcript_237637;Transcript_242401;Transcript_244736
GO:0004573	F:mannosyl-oligosaccharide_glucosidase_activity	3	0.25427	Transcript_020755;Transcript_188406;Transcript_196073
GO:0031929	P:TOR_signaling	6	0.134191	Transcript_042128;Transcript_052076;Transcript_091277;Transcript_099656;Transcript_225466;Transcript_234610
GO:0008152	P:metabolic_process	18	0.000176673	Transcript_012960;Transcript_024304;Transcript_032026;Transcript_033354;Transcript_042305;Transcript_043008;Transcript_049647;Transcript_073235;Transcript_100361;Transcript_105193;Transcript_120702;Transcript_183694;Transcript_192739;Transcript_203785;Transcript_221446;Transcript_237715;Transcript_242253;Transcript_242732
GO:0016607	C:nuclear_speck	42	6.15271e-11	Transcript_003093;Transcript_004400;Transcript_005400;Transcript_011217;Transcript_015953;Transcript_016768;Transcript_032972;Transcript_034172;Transcript_037537;Transcript_040611;Transcript_048383;Transcript_051286;Transcript_065011;Transcript_089683;Transcript_096223;Transcript_097610;Transcript_124057;Transcript_129288;Transcript_130933;Transcript_150520;Transcript_153931;Transcript_155007;Tra…
GO:0003924	F:GTPase_activity	139	1.65959e-13	Transcript_001527;Transcript_003002;Transcript_004322;Transcript_004764;Transcript_006068;Transcript_006883;Transcript_007789;Transcript_008147;Transcript_008169;Transcript_008488;Transcript_009199;Transcript_012772;Transcript_016295;Transcript_016986;Transcript_017225;Transcript_017284;Transcript_017876;Transcript_018541;Transcript_019030;Transcript_021496;Transcript_021637;Transcript_021853;Tra…
ko00290	Valine,_leucine_and_isoleucine_biosynthesis	9	0.226243	Transcript_016816;Transcript_040344;Transcript_041676;Transcript_074888;Transcript_142023;Transcript_169815;Transcript_183003;Transcript_225154;Transcript_230378
GO:0031118	P:rRNA_pseudouridine_synthesis	5	0.375434	Transcript_043981;Transcript_103493;Transcript_187619;Transcript_232706;Transcript_234243
ko00562	Inositol_phosphate_metabolism	39	0.00108777	Transcript_004615;Transcript_008140;Transcript_008396;Transcript_019424;Transcript_027651;Transcript_028100;Transcript_034819;Transcript_035784;Transcript_042004;Transcript_042777;Transcript_043137;Transcript_075635;Transcript_088132;Transcript_093969;Transcript_099453;Transcript_105247;Transcript_112814;Transcript_140517;Transcript_151452;Transcript_154268;Transcript_156831;Transcript_174975;Tra…
GO:0000278	P:mitotic_cell_cycle	14	7.05672e-05	Transcript_000262;Transcript_005533;Transcript_015354;Transcript_044030;Transcript_057808;Transcript_078881;Transcript_142487;Transcript_194208;Transcript_222679;Transcript_225125;Transcript_226150;Transcript_238433;Transcript_238719;Transcript_244041
GO:0010499	P:proteasomal_ubiquitin-independent_protein_catabolic_process	13	0.000424315	Transcript_000167;Transcript_006763;Transcript_007681;Transcript_056267;Transcript_131551;Transcript_168142;Transcript_186929;Transcript_223712;Transcript_233919;Transcript_237043;Transcript_238392;Transcript_238571;Transcript_240282
GO:0010218	P:response_to_far_red_light	32	0.0171067	Transcript_001458;Transcript_005159;Transcript_016768;Transcript_017199;Transcript_019499;Transcript_023102;Transcript_025389;Transcript_034467;Transcript_054583;Transcript_068885;Transcript_084874;Transcript_094361;Transcript_130283;Transcript_131178;Transcript_150535;Transcript_155928;Transcript_157364;Transcript_159497;Transcript_160052;Transcript_186151;Transcript_202542;Transcript_208023;Tra…
ko03450	Non-homologous_end-joining	2	0.077373	Transcript_151621;Transcript_196318
GO:0097428	P:protein_maturation_by_iron-sulfur_cluster_transfer	2	0.456579	Transcript_161838;Transcript_196107
GO:0015986	P:ATP_synthesis_coupled_proton_transport	18	8.62401e-09	Transcript_002006;Transcript_006577;Transcript_012787;Transcript_017330;Transcript_040111;Transcript_044692;Transcript_080504;Transcript_084692;Transcript_085172;Transcript_182662;Transcript_197105;Transcript_205374;Transcript_207464;Transcript_228003;Transcript_230173;Transcript_231016;Transcript_232683;Transcript_237336
GO:0048609	P:multicellular_organismal_reproductive_process	2	1	Transcript_020142;Transcript_163580
GO:0006379	P:mRNA_cleavage	3	0.0321879	Transcript_009288;Transcript_023322;Transcript_183842
GO:0001829	P:trophectodermal_cell_differentiation	2	0.281171	Transcript_221863;Transcript_228725
GO:0005700	C:polytene_chromosome	2	0.0224103	Transcript_187863;Transcript_213037
GO:0030267	F:glyoxylate_reductase_(NADP)_activity	2	0.0565074	Transcript_192739;Transcript_230201
GO:0006696	P:ergosterol_biosynthetic_process	2	1	Transcript_043845;Transcript_153316
GO:0034613	P:cellular_protein_localization	11	0.0662232	Transcript_015977;Transcript_143707;Transcript_154073;Transcript_158395;Transcript_161523;Transcript_177938;Transcript_188886;Transcript_196263;Transcript_197754;Transcript_234937;Transcript_241308
GO:0004000	F:adenosine_deaminase_activity_	3	0.471648	Transcript_040279;Transcript_099315;Transcript_236724
GO:0043680	C:filiform_apparatus_	4	0.79695	Transcript_002815;Transcript_035826;Transcript_080393;Transcript_160231
GO:0046715	F:borate_transmembrane_transporter_activity	2	1	Transcript_156652;Transcript_188161
GO:0005667	C:transcription_factor_complex	5	0.0538564	Transcript_043517;Transcript_182959;Transcript_231597;Transcript_236570;Transcript_240310
GO:0006144	P:purine_nucleobase_metabolic_process	7	0.235393	Transcript_006234;Transcript_008690;Transcript_010202;Transcript_018744;Transcript_040279;Transcript_170776;Transcript_235160
GO:0016246	P:RNA_interference	6	0.134191	Transcript_021363;Transcript_144160;Transcript_151365;Transcript_163678;Transcript_177018;Transcript_207218
GO:0030435	P:sporulation_resulting_in_formation_of_a_cellular_spore	4	0.0567059	Transcript_024647;Transcript_094947;Transcript_170217;Transcript_243228
GO:0006996	P:organelle_organization	2	0.0311089	Transcript_016986;Transcript_183122
GO:0008340	P:determination_of_adult_lifespan	10	0.0189038	Transcript_005422;Transcript_039672;Transcript_047488;Transcript_049824;Transcript_062378;Transcript_067433;Transcript_155807;Transcript_186849;Transcript_202986;Transcript_222162
GO:0030263	P:apoptotic_chromosome_condensation	2	0.281171	Transcript_124057;Transcript_236631
GO:0048563	P:post-embryonic_organ_morphogenesis	2	0.776635	Transcript_224875;Transcript_235043
GO:0017022	F:myosin_binding	2	0.0224103	Transcript_121263;Transcript_192384
GO:0050821	P:protein_stabilization	15	0.137077	Transcript_002509;Transcript_007081;Transcript_044013;Transcript_044323;Transcript_060502;Transcript_159752;Transcript_191113;Transcript_215804;Transcript_220498;Transcript_223230;Transcript_226324;Transcript_236156;Transcript_236570;Transcript_236593;Transcript_236936
GO:0000781	C:chromosome,_telomeric_region_	7	0.0766515	Transcript_023610;Transcript_044881;Transcript_068956;Transcript_195595;Transcript_199136;Transcript_222696;Transcript_233446
GO:0009909	P:regulation_of_flower_development	45	0.00017896	Transcript_000262;Transcript_000361;Transcript_005350;Transcript_006567;Transcript_008670;Transcript_017085;Transcript_023059;Transcript_023102;Transcript_042145;Transcript_042637;Transcript_043742;Transcript_043973;Transcript_047596;Transcript_063040;Transcript_068885;Transcript_080710;Transcript_085304;Transcript_095076;Transcript_095357;Transcript_098916;Transcript_105037;Transcript_105215;Tra…
GO:0032259	P:methylation	15	0.0541405	Transcript_013262;Transcript_014046;Transcript_018787;Transcript_024662;Transcript_026945;Transcript_039610;Transcript_040342;Transcript_043845;Transcript_050557;Transcript_064185;Transcript_076539;Transcript_164838;Transcript_175774;Transcript_225531;Transcript_236664
GO:0000096	P:sulfur_amino_acid_metabolic_process	5	0.696697	Transcript_005422;Transcript_130283;Transcript_215175;Transcript_225061;Transcript_230080
GO:0009956	P:radial_pattern_formation	4	0.27286	Transcript_030458;Transcript_143279;Transcript_155722;Transcript_187081
GO:0045793	P:positive_regulation_of_cell_size	2	1	Transcript_030254;Transcript_123588
GO:0007005	P:mitochondrion_organization	12	0.0318903	Transcript_006675;Transcript_035630;Transcript_038402;Transcript_044013;Transcript_103207;Transcript_151890;Transcript_152779;Transcript_198760;Transcript_201196;Transcript_231713;Transcript_234898;Transcript_244675
ko04740	Olfactory_transduction	2	0.256238	Transcript_018125;Transcript_031338
GO:0004103	F:choline_kinase_activity	3	0.506334	Transcript_043217;Transcript_043695;Transcript_114057
ko04114	Oocyte_meiosis	53	6.14913e-09	Transcript_006445;Transcript_007158;Transcript_007259;Transcript_008863;Transcript_008964;Transcript_010012;Transcript_012094;Transcript_013342;Transcript_015369;Transcript_017223;Transcript_018125;Transcript_022136;Transcript_024575;Transcript_025199;Transcript_026483;Transcript_027757;Transcript_029211;Transcript_032232;Transcript_033023;Transcript_037855;Transcript_042466;Transcript_047526;Tra…
GO:0003779	F:actin_binding_	21	0.251415	Transcript_009791;Transcript_011795;Transcript_026391;Transcript_036623;Transcript_056109;Transcript_106105;Transcript_151249;Transcript_154200;Transcript_155059;Transcript_168658;Transcript_170020;Transcript_180285;Transcript_181944;Transcript_199789;Transcript_217583;Transcript_229172;Transcript_230454;Transcript_233235;Transcript_233424;Transcript_238826;Transcript_239972
GO:0033597	C:mitotic_checkpoint_complex_	2	0.602246	Transcript_006445;Transcript_047526
GO:0045263	C:proton-transporting_ATP_synthase_complex,_coupling_factor_F(o)	10	0.058809	Transcript_006577;Transcript_009645;Transcript_012761;Transcript_042963;Transcript_141694;Transcript_160137;Transcript_180084;Transcript_228174;Transcript_233252;Transcript_235433
GO:0006760	P:folic_acid-containing_compound_metabolic_process	2	0.281171	Transcript_235088;Transcript_243894
GO:0009165	P:nucleotide_biosynthetic_process	4	0.00565404	Transcript_014600;Transcript_096604;Transcript_152310;Transcript_215498
GO:0043968	P:histone_H2A_acetylation	2	0.602246	Transcript_182959;Transcript_231597
GO:0005471	F:ATP:ADP_antiporter_activity	5	0.46668	Transcript_001813;Transcript_007414;Transcript_067433;Transcript_148284;Transcript_222162
GO:0040022	P:feminization_of_hermaphroditic_germ-line	2	1	Transcript_172050;Transcript_175896
GO:0009088	P:threonine_biosynthetic_process	3	0.0129099	Transcript_014765;Transcript_045644;Transcript_098122
GO:0008611	P:ether_lipid_biosynthetic_process	2	1	Transcript_195353;Transcript_231182
GO:0000963	P:mitochondrial_RNA_processing	2	1	Transcript_008914;Transcript_049582
GO:0009658	P:chloroplast_organization	36	0.000169798	Transcript_001527;Transcript_003002;Transcript_009175;Transcript_010400;Transcript_011725;Transcript_017199;Transcript_017246;Transcript_019748;Transcript_021548;Transcript_022259;Transcript_031690;Transcript_051872;Transcript_079851;Transcript_082965;Transcript_162817;Transcript_180641;Transcript_185821;Transcript_187753;Transcript_195266;Transcript_199763;Transcript_204443;Transcript_208023;Tra…
GO:0000070	P:mitotic_sister_chromatid_segregation	3	0.00274618	Transcript_020142;Transcript_060502;Transcript_163580
GO:0019900	F:kinase_binding	5	0.0139338	Transcript_006445;Transcript_047526;Transcript_105215;Transcript_135745;Transcript_155035
GO:0045017	P:glycerolipid_biosynthetic_process	2	1	Transcript_082038;Transcript_159104
GO:0010087	P:phloem_or_xylem_histogenesis	13	0.00147289	Transcript_019242;Transcript_030722;Transcript_035477;Transcript_045970;Transcript_062668;Transcript_086222;Transcript_103584;Transcript_112363;Transcript_128697;Transcript_149776;Transcript_185437;Transcript_229020;Transcript_234354
GO:0044598	P:doxorubicin_metabolic_process	2	0.154885	Transcript_043848;Transcript_225871
GO:0005813	C:centrosome_	19	4.03747e-05	Transcript_012934;Transcript_019749;Transcript_029234;Transcript_057410;Transcript_093222;Transcript_098359;Transcript_105352;Transcript_142487;Transcript_163278;Transcript_172586;Transcript_186849;Transcript_188899;Transcript_223219;Transcript_231717;Transcript_234291;Transcript_237595;Transcript_238948;Transcript_242034;Transcript_242523
GO:0070696	F:transmembrane_receptor_protein_serine/threonine_kinase_binding	10	0.166839	Transcript_017241;Transcript_095225;Transcript_157183;Transcript_161473;Transcript_165502;Transcript_223142;Transcript_223793;Transcript_227492;Transcript_227862;Transcript_236709
GO:0048868	P:pollen_tube_development	5	0.0109412	Transcript_021556;Transcript_022940;Transcript_135745;Transcript_194302;Transcript_244417
GO:0070402	F:NADPH_binding	12	0.0905131	Transcript_015457;Transcript_017329;Transcript_023390;Transcript_026463;Transcript_105998;Transcript_127755;Transcript_156275;Transcript_158422;Transcript_176804;Transcript_192739;Transcript_230201;Transcript_233955
GO:0080031	F:methyl_salicylate_esterase_activity	3	0.00979509	Transcript_024304;Transcript_049647;Transcript_100361
GO:0001682	P:tRNA_5'-leader_removal	2	0.406345	Transcript_222331;Transcript_228357
GO:0036455	F:iron-sulfur_transferase_activity	2	0.456579	Transcript_161838;Transcript_196107
GO:0006436	P:tryptophanyl-tRNA_aminoacylation	3	0.639444	Transcript_018892;Transcript_206168;Transcript_240340
GO:0004197	F:cysteine-type_endopeptidase_activity	39	0.0470687	Transcript_007729;Transcript_013501;Transcript_015686;Transcript_021266;Transcript_027153;Transcript_037886;Transcript_038847;Transcript_041571;Transcript_042452;Transcript_067882;Transcript_083120;Transcript_095268;Transcript_106961;Transcript_140534;Transcript_149903;Transcript_156977;Transcript_157316;Transcript_175291;Transcript_175518;Transcript_187000;Transcript_188629;Transcript_191544;Tra…
GO:0004396	F:hexokinase_activity	3	0.805419	Transcript_014026;Transcript_016745;Transcript_243959
GO:0006895	P:Golgi_to_endosome_transport	2	0.256238	Transcript_099681;Transcript_168419
GO:0007009	P:plasma_membrane_organization	4	1	Transcript_026391;Transcript_064014;Transcript_151249;Transcript_202821
GO:0021549	P:cerebellum_development	2	1	Transcript_149157;Transcript_235160
ko00591	Linoleic_acid_metabolism	5	0.00186956	Transcript_019187;Transcript_034640;Transcript_041368;Transcript_154217;Transcript_231715
GO:0007417	P:central_nervous_system_development	7	0.850424	Transcript_004615;Transcript_026391;Transcript_098359;Transcript_112814;Transcript_149814;Transcript_184391;Transcript_196140
GO:0009887	P:organ_morphogenesis	4	0.671724	Transcript_006567;Transcript_135727;Transcript_172586;Transcript_230705
GO:0010044	P:response_to_aluminum_ion	2	0.0311089	Transcript_015457;Transcript_065623
GO:0051260	P:protein_homooligomerization	12	0.00822022	Transcript_003727;Transcript_009564;Transcript_017478;Transcript_017912;Transcript_025134;Transcript_034751;Transcript_039672;Transcript_043173;Transcript_056825;Transcript_161919;Transcript_161936;Transcript_243895
GO:0050826	P:response_to_freezing	5	0.0184647	Transcript_000262;Transcript_003093;Transcript_017085;Transcript_186835;Transcript_244041
GO:0006378	P:mRNA_polyadenylation	11	0.00551912	Transcript_005462;Transcript_009288;Transcript_019944;Transcript_020625;Transcript_124077;Transcript_148651;Transcript_173644;Transcript_183842;Transcript_222440;Transcript_226150;Transcript_237296
GO:0043715	F:2,3-diketo-5-methylthiopentyl-1-phosphate_enolase_activity	2	1	Transcript_010578;Transcript_044766
GO:0031204	P:posttranslational_protein_targeting_to_membrane,_translocation	4	0.163503	Transcript_003076;Transcript_054119;Transcript_102356;Transcript_191386
GO:0004030	F:aldehyde_dehydrogenase_NAD(P)+_activity	8	0.537299	Transcript_006753;Transcript_029683;Transcript_042657;Transcript_042860;Transcript_066107;Transcript_126947;Transcript_132356;Transcript_161236
GO:0000326	C:protein_storage_vacuole	5	0.0323053	Transcript_004905;Transcript_009157;Transcript_020502;Transcript_027153;Transcript_239536
GO:0042491	P:auditory_receptor_cell_differentiation	2	0.776635	Transcript_224875;Transcript_235043
GO:0015691	P:cadmium_ion_transport	2	0.154885	Transcript_169458;Transcript_224278
GO:0000815	C:ESCRT_III_complex_	7	0.00478888	Transcript_024674;Transcript_025114;Transcript_089471;Transcript_197855;Transcript_199536;Transcript_205682;Transcript_240915
GO:0016578	P:histone_deubiquitination	3	1	Transcript_182959;Transcript_227860;Transcript_231597
ko04014	Ras_signaling_pathway	31	0.000305911	Transcript_013885;Transcript_018125;Transcript_021853;Transcript_024575;Transcript_029041;Transcript_032009;Transcript_033023;Transcript_040172;Transcript_043118;Transcript_058863;Transcript_072106;Transcript_098400;Transcript_150338;Transcript_150886;Transcript_153043;Transcript_154217;Transcript_162158;Transcript_181202;Transcript_183122;Transcript_206442;Transcript_207470;Transcript_223900;Tra…
GO:0042470	C:melanosome	12	0.0064969	Transcript_010816;Transcript_017876;Transcript_029022;Transcript_111090;Transcript_127755;Transcript_173643;Transcript_193507;Transcript_195673;Transcript_208090;Transcript_231289;Transcript_238792;Transcript_241752
GO:0071395	P:cellular_response_to_jasmonic_acid_stimulus	2	0.595334	Transcript_009214;Transcript_165735
GO:0033147	P:negative_regulation_of_intracellular_estrogen_receptor_signaling_pathway	7	0.850424	Transcript_007955;Transcript_013159;Transcript_013502;Transcript_044013;Transcript_133459;Transcript_197185;Transcript_222281
GO:0034063	P:stress_granule_assembly	2	0.14426	Transcript_231215;Transcript_237857
GO:0005247	F:voltage-gated_chloride_channel_activity	11	0.777903	Transcript_000586;Transcript_029459;Transcript_043022;Transcript_062728;Transcript_083245;Transcript_110124;Transcript_165857;Transcript_195883;Transcript_224755;Transcript_225310;Transcript_229453
GO:0030029	P:actin_filament-based_process	3	1	Transcript_034593;Transcript_115850;Transcript_116920
GO:0055046	P:microgametogenesis	9	0.0648237	Transcript_014434;Transcript_015213;Transcript_019779;Transcript_042049;Transcript_050769;Transcript_153202;Transcript_157109;Transcript_209684;Transcript_237042
GO:0030127	C:COPII_vesicle_coat_	9	0.0259226	Transcript_015058;Transcript_017948;Transcript_018249;Transcript_030141;Transcript_035044;Transcript_137297;Transcript_149696;Transcript_154901;Transcript_222954
ko04918	Thyroid_hormone_synthesis	7	0.0178107	Transcript_003393;Transcript_005780;Transcript_045319;Transcript_231979;Transcript_237748;Transcript_240676;Transcript_241695
GO:0030721	P:spectrosome_organization	2	0.281171	Transcript_026391;Transcript_151249
GO:0016784	F:3-mercaptopyruvate_sulfurtransferase_activity	2	0.14426	Transcript_186194;Transcript_216545
GO:0005764	C:lysosome	41	0.000642804	Transcript_007729;Transcript_013501;Transcript_019653;Transcript_028938;Transcript_077638;Transcript_091277;Transcript_104344;Transcript_107757;Transcript_112191;Transcript_137357;Transcript_156977;Transcript_157316;Transcript_159466;Transcript_175518;Transcript_176604;Transcript_180664;Transcript_183236;Transcript_183936;Transcript_185643;Transcript_188629;Transcript_196234;Transcript_198586;Tra…
GO:0016760	F:cellulose_synthase_(UDP-forming)_activity	27	0.0392971	Transcript_009608;Transcript_011648;Transcript_014722;Transcript_014866;Transcript_025076;Transcript_029920;Transcript_032955;Transcript_039734;Transcript_043816;Transcript_047682;Transcript_148491;Transcript_151188;Transcript_151449;Transcript_155618;Transcript_162948;Transcript_164288;Transcript_180456;Transcript_181586;Transcript_211600;Transcript_222229;Transcript_224594;Transcript_226849;Tra…
GO:0003887	F:DNA-directed_DNA_polymerase_activity	21	9.31485e-07	Transcript_009058;Transcript_016600;Transcript_028366;Transcript_042368;Transcript_060977;Transcript_130853;Transcript_163678;Transcript_181236;Transcript_186066;Transcript_187860;Transcript_188242;Transcript_190556;Transcript_210615;Transcript_221864;Transcript_223070;Transcript_223843;Transcript_224573;Transcript_226266;Transcript_228204;Transcript_234470;Transcript_234987
GO:0031430	C:M_band	3	0.393222	Transcript_072674;Transcript_145207;Transcript_221999
GO:0032502	P:developmental_process	2	0.00324108	Transcript_183244;Transcript_205830
GO:0043697	P:cell_dedifferentiation	2	0.154885	Transcript_016556;Transcript_141463
GO:2001143	P:N-methylnicotinate_transport	2	0.343054	Transcript_102104;Transcript_141252
GO:0001894	P:tissue_homeostasis	4	0.316916	Transcript_043848;Transcript_062378;Transcript_202986;Transcript_225871
GO:0009630	P:gravitropism	14	0.300143	Transcript_008506;Transcript_016768;Transcript_045444;Transcript_071723;Transcript_128243;Transcript_167138;Transcript_172493;Transcript_181757;Transcript_185689;Transcript_222031;Transcript_230634;Transcript_231427;Transcript_231582;Transcript_237078
ko05205	Proteoglycans_in_cancer	35	5.00777e-06	Transcript_007158;Transcript_009220;Transcript_013342;Transcript_015593;Transcript_017203;Transcript_021853;Transcript_024575;Transcript_025199;Transcript_031071;Transcript_032232;Transcript_033023;Transcript_043118;Transcript_058863;Transcript_072106;Transcript_107816;Transcript_149141;Transcript_150338;Transcript_150886;Transcript_162158;Transcript_172782;Transcript_207470;Transcript_223900;Tra…
GO:0005344	F:oxygen_transporter_activity	2	1	Transcript_224936;Transcript_243572
GO:0006303	P:double-strand_break_repair_via_nonhomologous_end_joining	2	0.006011	Transcript_189892;Transcript_196318
GO:1900426	P:positive_regulation_of_defense_response_to_bacterium	3	0.805419	Transcript_019933;Transcript_095376;Transcript_226917
ko00908	Zeatin_biosynthesis	7	0.352837	Transcript_039162;Transcript_124970;Transcript_161063;Transcript_199123;Transcript_201752;Transcript_239518;Transcript_244225
GO:0051967	P:negative_regulation_of_synaptic_transmission,_glutamatergic	2	1	Transcript_045070;Transcript_154171
GO:0070483	P:detection_of_hypoxia	2	1	Transcript_158353;Transcript_179972
GO:0000118	C:histone_deacetylase_complex	5	0.148219	Transcript_026022;Transcript_089325;Transcript_208940;Transcript_231824;Transcript_242736
GO:0030687	C:preribosome,_large_subunit_precursor	6	0.600422	Transcript_003573;Transcript_117240;Transcript_146755;Transcript_151808;Transcript_165164;Transcript_244072
GO:0010093	P:specification_of_floral_organ_identity	6	0.13666	Transcript_008670;Transcript_025003;Transcript_113130;Transcript_206425;Transcript_222274;Transcript_232277
GO:0005525	F:GTP_binding	230	7.78376e-22	Transcript_001527;Transcript_003002;Transcript_004322;Transcript_004764;Transcript_006068;Transcript_006668;Transcript_006883;Transcript_007628;Transcript_007789;Transcript_008147;Transcript_008169;Transcript_008488;Transcript_009199;Transcript_012772;Transcript_013934;Transcript_016295;Transcript_016986;Transcript_017225;Transcript_017284;Transcript_017478;Transcript_017817;Transcript_017876;Tra…
GO:0052821	F:DNA-7-methyladenine_glycosylase_activity	3	1	Transcript_012325;Transcript_167757;Transcript_237865
GO:0016444	P:somatic_cell_DNA_recombination	7	0.357197	Transcript_019933;Transcript_023059;Transcript_043808;Transcript_191918;Transcript_221925;Transcript_233818;Transcript_242617
GO:0003993	F:acid_phosphatase_activity	23	0.00799198	Transcript_003593;Transcript_009296;Transcript_015717;Transcript_019058;Transcript_019424;Transcript_023452;Transcript_024951;Transcript_026294;Transcript_026852;Transcript_033456;Transcript_033621;Transcript_066274;Transcript_099657;Transcript_104615;Transcript_111143;Transcript_152976;Transcript_159374;Transcript_200899;Transcript_223780;Transcript_225536;Transcript_229633;Transcript_232424;Tra…
GO:0080153	P:negative_regulation_of_reductive_pentose-phosphate_cycle	2	0.456579	Transcript_174797;Transcript_235570
ko04146	Peroxisome	56	1.31181e-07	Transcript_003866;Transcript_009590;Transcript_016804;Transcript_017965;Transcript_018717;Transcript_021257;Transcript_022357;Transcript_022935;Transcript_026667;Transcript_027403;Transcript_028277;Transcript_038714;Transcript_039926;Transcript_042399;Transcript_042481;Transcript_043070;Transcript_067992;Transcript_070222;Transcript_089452;Transcript_093421;Transcript_098425;Transcript_112171;Tra…
GO:0035152	P:regulation_of_tube_architecture,_open_tracheal_system	2	0.776635	Transcript_062378;Transcript_202986
GO:0030659	C:cytoplasmic_vesicle_membrane_	19	0.00753131	Transcript_000897;Transcript_009421;Transcript_024360;Transcript_028938;Transcript_056825;Transcript_058422;Transcript_062589;Transcript_094165;Transcript_105352;Transcript_135745;Transcript_147979;Transcript_159466;Transcript_159739;Transcript_176604;Transcript_224039;Transcript_228469;Transcript_229224;Transcript_230634;Transcript_233044
GO:0017070	F:U6_snRNA_binding	7	0.290863	Transcript_011217;Transcript_043873;Transcript_187896;Transcript_206492;Transcript_227324;Transcript_227922;Transcript_229688
GO:0009725	P:response_to_hormone	6	0.600422	Transcript_001724;Transcript_012288;Transcript_030348;Transcript_123465;Transcript_136284;Transcript_172327
GO:0012511	C:monolayer-surrounded_lipid_storage_body	2	1	Transcript_019877;Transcript_158741
GO:0009560	P:embryo_sac_egg_cell_differentiation	3	0.179749	Transcript_144160;Transcript_227324;Transcript_243035
ko04621	NOD-like_receptor_signaling_pathway	7	0.00362049	Transcript_005780;Transcript_067709;Transcript_069862;Transcript_070670;Transcript_072106;Transcript_223900;Transcript_230696
GO:0004032	F:alditol:NADP+_1-oxidoreductase_activity	2	0.281171	Transcript_043848;Transcript_225871
GO:0009451	P:RNA_modification	2	0.0412318	Transcript_023301;Transcript_148648
GO:0010208	P:pollen_wall_assembly	5	0.118091	Transcript_028541;Transcript_044497;Transcript_155810;Transcript_222195;Transcript_239945
GO:0005093	F:Rab_GDP-dissociation_inhibitor_activity	2	0.14426	Transcript_222429;Transcript_232581
GO:0005518	F:collagen_binding	2	1	Transcript_156977;Transcript_222697
GO:0007140	P:male_meiosis	4	0.163503	Transcript_003587;Transcript_023930;Transcript_221925;Transcript_223924
GO:0016308	F:1-phosphatidylinositol-4-phosphate_5-kinase_activity	9	0.555674	Transcript_027651;Transcript_036469;Transcript_042004;Transcript_075635;Transcript_151452;Transcript_185415;Transcript_187099;Transcript_212610;Transcript_222718
GO:0010342	P:endosperm_cellularization	2	0.776635	Transcript_156560;Transcript_214657
GO:0016559	P:peroxisome_fission	4	0.0750029	Transcript_099714;Transcript_125361;Transcript_177092;Transcript_243789
GO:0003917	F:DNA_topoisomerase_type_I_activity	2	0.0431288	Transcript_033085;Transcript_223303
GO:0008565	F:protein_transporter_activity	58	0.000118008	Transcript_002482;Transcript_003076;Transcript_007619;Transcript_008375;Transcript_014656;Transcript_015912;Transcript_016857;Transcript_018757;Transcript_018940;Transcript_023894;Transcript_024203;Transcript_027502;Transcript_027900;Transcript_028902;Transcript_030480;Transcript_030989;Transcript_035574;Transcript_036176;Transcript_054870;Transcript_062783;Transcript_075386;Transcript_080143;Tra…
GO:0009527	C:plastid_outer_membrane	2	0.456579	Transcript_203753;Transcript_242507
GO:0080046	F:quercetin_4'-O-glucosyltransferase_activity	5	0.0426106	Transcript_008307;Transcript_111529;Transcript_166916;Transcript_221890;Transcript_233591
GO:0052853	F:long-chain-(S)-2-hydroxy-long-chain-acid_oxidase_activity	3	0.645282	Transcript_019203;Transcript_192336;Transcript_236198
GO:0016568	P:chromatin_modification	43	2.99541e-08	Transcript_002104;Transcript_004198;Transcript_005476;Transcript_008971;Transcript_018951;Transcript_019766;Transcript_019967;Transcript_023610;Transcript_026022;Transcript_026456;Transcript_027836;Transcript_037801;Transcript_041469;Transcript_042815;Transcript_043150;Transcript_049772;Transcript_060015;Transcript_067728;Transcript_073634;Transcript_082036;Transcript_082825;Transcript_099209;Tra…
GO:0045931	P:positive_regulation_of_mitotic_cell_cycle	4	1	Transcript_010314;Transcript_057067;Transcript_064681;Transcript_226879
ko00860	Porphyrin_and_chlorophyll_metabolism	33	0.00934594	Transcript_007658;Transcript_007719;Transcript_011056;Transcript_013606;Transcript_024806;Transcript_026572;Transcript_028099;Transcript_030702;Transcript_039610;Transcript_043008;Transcript_044547;Transcript_078941;Transcript_087500;Transcript_154440;Transcript_167861;Transcript_168145;Transcript_175774;Transcript_177693;Transcript_183522;Transcript_203622;Transcript_203786;Transcript_211261;Tra…
GO:0046027	F:phospholipid:diacylglycerol_acyltransferase_activity	4	0.783799	Transcript_030475;Transcript_092343;Transcript_145120;Transcript_241989
GO:0003863	F:3-methyl-2-oxobutanoate_dehydrogenase_(2-methylpropanoyl-transferring)_activity	2	0.256238	Transcript_035710;Transcript_075241
GO:0009648	P:photoperiodism	7	0.860394	Transcript_034016;Transcript_098916;Transcript_113639;Transcript_129681;Transcript_167459;Transcript_167461;Transcript_237879
GO:0008725	F:DNA-3-methyladenine_glycosylase_activity_	3	0.0129099	Transcript_012325;Transcript_167757;Transcript_237865
GO:0036435	F:K48-linked_polyubiquitin_binding	4	0.563109	Transcript_166692;Transcript_185466;Transcript_223185;Transcript_243895
GO:0010289	P:homogalacturonan_biosynthetic_process	4	0.433453	Transcript_002026;Transcript_218648;Transcript_236296;Transcript_242622
GO:0080185	P:effector_dependent_induction_by_symbiont_of_host_immune_response	2	0.776635	Transcript_014432;Transcript_055058
GO:0010077	P:maintenance_of_inflorescence_meristem_identity	2	0.19603	Transcript_041496;Transcript_150050
GO:2000327	P:positive_regulation_of_ligand-dependent_nuclear_receptor_transcription_coactivator_activity	2	1	Transcript_013159;Transcript_133459
GO:0023014	P:signal_transduction_by_protein_phosphorylation	12	0.00822022	Transcript_005825;Transcript_007873;Transcript_016768;Transcript_020405;Transcript_032858;Transcript_158984;Transcript_164557;Transcript_194509;Transcript_196770;Transcript_238765;Transcript_239898;Transcript_240348
GO:0009416	P:response_to_light_stimulus	41	5.48934e-06	Transcript_003467;Transcript_003756;Transcript_005350;Transcript_018235;Transcript_020976;Transcript_021189;Transcript_024912;Transcript_031083;Transcript_032947;Transcript_050191;Transcript_057825;Transcript_063233;Transcript_067318;Transcript_095035;Transcript_113284;Transcript_127616;Transcript_140231;Transcript_150877;Transcript_152896;Transcript_154247;Transcript_162951;Transcript_163988;Tra…
GO:0030286	C:dynein_complex	3	0.506334	Transcript_047488;Transcript_052877;Transcript_128685
GO:0047184	F:1-acylglycerophosphocholine_O-acyltransferase_activity	2	1	Transcript_082038;Transcript_159104
GO:0006835	P:dicarboxylic_acid_transport	3	0.102019	Transcript_084246;Transcript_229504;Transcript_242712
GO:0051306	P:mitotic_sister_chromatid_separation	2	1	Transcript_133924;Transcript_227790
GO:0006024	P:glycosaminoglycan_biosynthetic_process	4	0.27286	Transcript_030722;Transcript_034014;Transcript_128697;Transcript_180845
GO:0010474	F:glucose-1-phosphate_guanylyltransferase_(GDP)_activity	2	0.105779	Transcript_166916;Transcript_233591
GO:0007000	P:nucleolus_organization	3	1	Transcript_044881;Transcript_104729;Transcript_233446
GO:0015977	P:carbon_fixation	5	0.375434	Transcript_042444;Transcript_111072;Transcript_165354;Transcript_181595;Transcript_234176
GO:0031361	C:integral_component_of_thylakoid_membrane	2	0.256238	Transcript_005893;Transcript_076266
GO:0043235	C:receptor_complex	2	0.595334	Transcript_005893;Transcript_076266
GO:0051607	P:defense_response_to_virus	12	3.0745e-05	Transcript_017301;Transcript_018122;Transcript_028662;Transcript_085726;Transcript_150046;Transcript_150927;Transcript_163678;Transcript_168736;Transcript_198404;Transcript_225376;Transcript_229927;Transcript_239920
GO:1990714	F:hydroxyproline_O-galactosyltransferase_activity	2	0.256238	Transcript_005595;Transcript_235735
GO:0004488	F:methylenetetrahydrofolate_dehydrogenase_(NADP+)_activity	4	0.671724	Transcript_222033;Transcript_222717;Transcript_230052;Transcript_236752
GO:0051707	P:response_to_other_organism	11	0.180541	Transcript_013231;Transcript_016524;Transcript_017301;Transcript_018122;Transcript_087653;Transcript_095376;Transcript_112743;Transcript_150046;Transcript_150927;Transcript_198404;Transcript_225376
GO:0046103	P:inosine_biosynthetic_process	3	0.471648	Transcript_040279;Transcript_099315;Transcript_236724
GO:0030868	C:smooth_endoplasmic_reticulum_membrane	2	0.602246	Transcript_015058;Transcript_154901
GO:0097502	P:mannosylation	10	0.0119464	Transcript_015718;Transcript_047682;Transcript_049938;Transcript_078193;Transcript_082760;Transcript_164288;Transcript_199962;Transcript_226093;Transcript_230094;Transcript_236933
GO:0015035	F:protein_disulfide_oxidoreductase_activity	40	4.62054e-05	Transcript_002210;Transcript_008652;Transcript_014604;Transcript_019529;Transcript_019891;Transcript_020481;Transcript_021943;Transcript_025620;Transcript_031115;Transcript_033053;Transcript_037733;Transcript_039086;Transcript_041792;Transcript_042724;Transcript_051915;Transcript_055585;Transcript_067091;Transcript_077043;Transcript_103151;Transcript_103919;Transcript_128602;Transcript_138711;Tra…
GO:0004749	F:ribose_phosphate_diphosphokinase_activity	4	0.032216	Transcript_014600;Transcript_096604;Transcript_152310;Transcript_215498
GO:0000913	P:preprophase_band_assembly	4	0.125711	Transcript_060521;Transcript_152461;Transcript_213409;Transcript_223219
GO:0009514	C:glyoxysome	12	0.00519067	Transcript_009200;Transcript_075423;Transcript_092161;Transcript_108861;Transcript_166191;Transcript_175002;Transcript_177792;Transcript_224340;Transcript_226289;Transcript_231413;Transcript_242645;Transcript_243565
GO:0015369	F:calcium:proton_antiporter_activity	8	0.869434	Transcript_006729;Transcript_011837;Transcript_043064;Transcript_050977;Transcript_195783;Transcript_209155;Transcript_230951;Transcript_235245
GO:0031519	C:PcG_protein_complex_	4	0.125711	Transcript_107774;Transcript_234875;Transcript_238122;Transcript_241543
GO:0015018	F:galactosylgalactosylxylosylprotein_3-beta-glucuronosyltransferase_activity	3	0.0793094	Transcript_027303;Transcript_059453;Transcript_244838
GO:0004322	F:ferroxidase_activity	4	0.0750029	Transcript_028064;Transcript_030702;Transcript_034761;Transcript_100725
GO:0030904	C:retromer_complex	3	0.0793094	Transcript_206246;Transcript_227745;Transcript_233788
GO:0048208	P:COPII_vesicle_coating	3	0.639444	Transcript_044030;Transcript_137297;Transcript_242814
GO:0016538	F:cyclin-dependent_protein_serine/threonine_kinase_regulator_activity	4	0.163503	Transcript_005533;Transcript_222679;Transcript_225920;Transcript_238719
GO:0015186	F:L-glutamine_transmembrane_transporter_activity	5	0.46668	Transcript_009968;Transcript_103108;Transcript_161004;Transcript_201742;Transcript_236224
GO:0052832	F:inositol_monophosphate_3-phosphatase_activity	4	0.342182	Transcript_008396;Transcript_042777;Transcript_043137;Transcript_230697
GO:0030553	F:cGMP_binding	7	0.00610749	Transcript_020718;Transcript_021235;Transcript_031338;Transcript_037156;Transcript_231162;Transcript_231707;Transcript_233542
GO:0005785	C:signal_recognition_particle_receptor_complex	2	1	Transcript_066587;Transcript_153986
GO:0055088	P:lipid_homeostasis	10	0.0912588	Transcript_018364;Transcript_046517;Transcript_053296;Transcript_158630;Transcript_160763;Transcript_192035;Transcript_208944;Transcript_227282;Transcript_234669;Transcript_242645
GO:0019773	C:proteasome_core_complex,_alpha-subunit_complex	9	0.00161619	Transcript_008163;Transcript_131551;Transcript_137101;Transcript_213671;Transcript_223712;Transcript_225892;Transcript_233919;Transcript_237026;Transcript_238571
GO:0005338	F:nucleotide-sugar_transmembrane_transporter_activity	6	1	Transcript_023429;Transcript_034534;Transcript_089910;Transcript_140672;Transcript_163360;Transcript_244821
GO:0008235	F:metalloexopeptidase_activity	6	0.404187	Transcript_036231;Transcript_065435;Transcript_117669;Transcript_138634;Transcript_170633;Transcript_174117
GO:0019953	P:sexual_reproduction	2	0.256238	Transcript_032207;Transcript_136126
ko05131	Shigellosis	23	0.000442006	Transcript_005372;Transcript_009220;Transcript_021853;Transcript_026515;Transcript_026710;Transcript_029211;Transcript_043118;Transcript_058863;Transcript_072106;Transcript_097610;Transcript_118410;Transcript_150338;Transcript_150886;Transcript_162158;Transcript_197714;Transcript_207470;Transcript_223900;Transcript_224126;Transcript_230020;Transcript_230696;Transcript_231953;Transcript_236061;Tra…
GO:0006107	P:oxaloacetate_metabolic_process	2	0.602246	Transcript_018160;Transcript_021238
GO:0030427	C:site_of_polarized_growth	6	0.658521	Transcript_015977;Transcript_021853;Transcript_150338;Transcript_150886;Transcript_207470;Transcript_224126
GO:1901149	F:salicylic_acid_binding	2	0.776635	Transcript_014432;Transcript_055058
GO:0004709	F:MAP_kinase_kinase_kinase_activity	12	0.0318903	Transcript_006747;Transcript_008240;Transcript_017841;Transcript_022653;Transcript_027827;Transcript_029225;Transcript_044661;Transcript_080417;Transcript_145272;Transcript_225563;Transcript_239942;Transcript_243228
GO:0001701	P:in_utero_embryonic_development	6	0.716775	Transcript_137297;Transcript_215505;Transcript_217411;Transcript_221863;Transcript_228725;Transcript_233890
GO:0061034	P:olfactory_bulb_mitral_cell_layer_development	2	0.281171	Transcript_053448;Transcript_097665
GO:0048768	P:root_hair_cell_tip_growth	4	0.0989074	Transcript_018145;Transcript_151452;Transcript_212610;Transcript_238113
GO:0019886	P:antigen_processing_and_presentation_of_exogenous_peptide_antigen_via_MHC_class_II	3	0.805419	Transcript_044030;Transcript_137297;Transcript_226324
GO:0004014	F:adenosylmethionine_decarboxylase_activity_	4	0.671724	Transcript_167567;Transcript_178172;Transcript_223308;Transcript_239547
GO:0043248	P:proteasome_assembly	7	0.352837	Transcript_031485;Transcript_043839;Transcript_057518;Transcript_166700;Transcript_201417;Transcript_225342;Transcript_231720
GO:0055129	P:L-proline_biosynthetic_process	7	0.844175	Transcript_011507;Transcript_013346;Transcript_074678;Transcript_087369;Transcript_089076;Transcript_093776;Transcript_159688
GO:0005903	C:brush_border	2	0.602246	Transcript_043277;Transcript_233721
GO:0030016	C:myofibril_	2	0.602246	Transcript_002619;Transcript_227818
GO:0005856	C:cytoskeleton	69	3.60623e-10	Transcript_003467;Transcript_006506;Transcript_007130;Transcript_008109;Transcript_008240;Transcript_008470;Transcript_009570;Transcript_013800;Transcript_014710;Transcript_016337;Transcript_016963;Transcript_026055;Transcript_027676;Transcript_028117;Transcript_028208;Transcript_028401;Transcript_028411;Transcript_031583;Transcript_033023;Transcript_034593;Transcript_038536;Transcript_041925;Tra…
GO:0009765	P:photosynthesis,_light_harvesting	18	0.0185259	Transcript_001398;Transcript_029009;Transcript_034467;Transcript_041806;Transcript_043301;Transcript_044033;Transcript_061257;Transcript_094001;Transcript_152342;Transcript_155928;Transcript_160052;Transcript_201460;Transcript_223379;Transcript_224850;Transcript_228305;Transcript_229852;Transcript_233475;Transcript_240528
GO:0008374	F:O-acyltransferase_activity	7	0.15452	Transcript_030475;Transcript_081430;Transcript_092343;Transcript_145120;Transcript_205939;Transcript_233571;Transcript_241989
GO:0006744	P:ubiquinone_biosynthetic_process	3	0.0129099	Transcript_038594;Transcript_042991;Transcript_241412
GO:0051724	F:NAD_transporter_activity	2	0.602246	Transcript_151360;Transcript_158845
GO:0030914	C:STAGA_complex	5	0.251798	Transcript_043536;Transcript_081822;Transcript_182959;Transcript_204709;Transcript_231597
GO:0043596	C:nuclear_replication_fork	5	0.240732	Transcript_008465;Transcript_142487;Transcript_166381;Transcript_181236;Transcript_210615
ko00220	Arginine_biosynthesis	13	5.40674e-05	Transcript_008700;Transcript_011172;Transcript_015673;Transcript_015937;Transcript_018746;Transcript_034831;Transcript_041964;Transcript_121073;Transcript_152779;Transcript_159737;Transcript_222132;Transcript_222398;Transcript_243550
GO:0000254	F:C-4_methylsterol_oxidase_activity	6	0.327925	Transcript_103343;Transcript_187074;Transcript_222051;Transcript_227784;Transcript_235147;Transcript_238658
GO:0005047	F:signal_recognition_particle_binding	6	0.829894	Transcript_016578;Transcript_066587;Transcript_152351;Transcript_153986;Transcript_229824;Transcript_242950
GO:0015191	F:L-methionine_transmembrane_transporter_activity	3	0.165222	Transcript_009968;Transcript_201742;Transcript_236224
GO:0019915	P:lipid_storage	11	0.309704	Transcript_000262;Transcript_002006;Transcript_017085;Transcript_019663;Transcript_021167;Transcript_029499;Transcript_031671;Transcript_150361;Transcript_182662;Transcript_186835;Transcript_244041
GO:2000899	P:xyloglucan_catabolic_process	5	0.696697	Transcript_121700;Transcript_129485;Transcript_140401;Transcript_173578;Transcript_219358
ko03320	PPAR_signaling_pathway	21	0.000198334	Transcript_004823;Transcript_009590;Transcript_015593;Transcript_017428;Transcript_027403;Transcript_028277;Transcript_038714;Transcript_042481;Transcript_112171;Transcript_156448;Transcript_156645;Transcript_160763;Transcript_175722;Transcript_177792;Transcript_192035;Transcript_201604;Transcript_235217;Transcript_238313;Transcript_241640;Transcript_242645;Transcript_243770
GO:0090306	P:spindle_assembly_involved_in_meiosis	2	1	Transcript_041366;Transcript_219169
GO:0043491	P:protein_kinase_B_signaling	3	1	Transcript_004615;Transcript_035784;Transcript_112814
GO:0071049	P:nuclear_retention_of_pre-mRNA_with_aberrant_3'-ends_at_the_site_of_transcription	2	0.343054	Transcript_030389;Transcript_230188
GO:0015175	F:neutral_amino_acid_transmembrane_transporter_activity	3	0.639444	Transcript_222474;Transcript_231171;Transcript_239841
GO:0051693	P:actin_filament_capping	5	0.0323053	Transcript_026391;Transcript_151249;Transcript_152731;Transcript_153842;Transcript_230892
GO:0006979	P:response_to_oxidative_stress	93	8.25069e-15	Transcript_003666;Transcript_005422;Transcript_005848;Transcript_009306;Transcript_009542;Transcript_011264;Transcript_012296;Transcript_013325;Transcript_013346;Transcript_014555;Transcript_015066;Transcript_018802;Transcript_019419;Transcript_027282;Transcript_030702;Transcript_033454;Transcript_034461;Transcript_035390;Transcript_042145;Transcript_042637;Transcript_043306;Transcript_043374;Tra…
GO:0000224	F:peptide-N4-(N-acetyl-beta-glucosaminyl)asparagine_amidase_activity	3	1	Transcript_018958;Transcript_030902;Transcript_163553
GO:0010468	P:regulation_of_gene_expression	15	6.98925e-05	Transcript_008002;Transcript_012262;Transcript_018722;Transcript_021722;Transcript_084855;Transcript_096223;Transcript_146450;Transcript_196180;Transcript_197626;Transcript_219618;Transcript_222995;Transcript_226895;Transcript_229342;Transcript_240874;Transcript_244514
GO:0047787	F:delta4-3-oxosteroid_5beta-reductase_activity	3	0.506334	Transcript_002504;Transcript_013377;Transcript_065775
GO:0005681	C:spliceosomal_complex	80	1.62024e-08	Transcript_002011;Transcript_005400;Transcript_007677;Transcript_008762;Transcript_011350;Transcript_012757;Transcript_014001;Transcript_015259;Transcript_016098;Transcript_017661;Transcript_018789;Transcript_020579;Transcript_022998;Transcript_034172;Transcript_034530;Transcript_040611;Transcript_041888;Transcript_042810;Transcript_043873;Transcript_043889;Transcript_044722;Transcript_057948;Tra…
GO:0030042	P:actin_filament_depolymerization	14	0.891492	Transcript_006418;Transcript_015431;Transcript_017414;Transcript_019534;Transcript_090276;Transcript_094814;Transcript_155059;Transcript_175365;Transcript_192139;Transcript_196277;Transcript_201238;Transcript_232236;Transcript_233424;Transcript_238075
GO:0010254	P:nectary_development	2	1	Transcript_042344;Transcript_236419
GO:0019521	P:D-gluconate_metabolic_process	4	0.268461	Transcript_042330;Transcript_136272;Transcript_228186;Transcript_233405
GO:0033843	F:xyloglucan_6-xylosyltransferase_activity	2	0.456579	Transcript_175920;Transcript_205685
GO:0046923	F:ER_retention_sequence_binding	5	0.300018	Transcript_037851;Transcript_058008;Transcript_098966;Transcript_218015;Transcript_226563
GO:0051555	P:flavonol_biosynthetic_process	2	1	Transcript_225662;Transcript_237670
ko05012	Parkinson's_disease	76	4.32713e-14	Transcript_002006;Transcript_006281;Transcript_008597;Transcript_009683;Transcript_013503;Transcript_018182;Transcript_020229;Transcript_020239;Transcript_024036;Transcript_026011;Transcript_035014;Transcript_038520;Transcript_043038;Transcript_043609;Transcript_043638;Transcript_044798;Transcript_047081;Transcript_049612;Transcript_051177;Transcript_052634;Transcript_058642;Transcript_063759;Tra…
GO:0043169	F:cation_binding	9	0.874942	Transcript_003099;Transcript_029413;Transcript_090732;Transcript_096847;Transcript_160755;Transcript_190885;Transcript_234708;Transcript_240005;Transcript_243510
GO:0005310	F:dicarboxylic_acid_transmembrane_transporter_activity	3	0.102019	Transcript_084246;Transcript_229504;Transcript_242712
GO:0004843	F:ubiquitin-specific_protease_activity	21	0.0721171	Transcript_015686;Transcript_017686;Transcript_038847;Transcript_042452;Transcript_043267;Transcript_054492;Transcript_067882;Transcript_083120;Transcript_140534;Transcript_175656;Transcript_186835;Transcript_187000;Transcript_191544;Transcript_207723;Transcript_222608;Transcript_224291;Transcript_229688;Transcript_236156;Transcript_237159;Transcript_240189;Transcript_242580
GO:0045156	F:electron_transporter,_transferring_electrons_within_the_cyclic_electron_transport_pathway_of_photosynthesis_activity	7	0.519278	Transcript_001984;Transcript_023909;Transcript_050144;Transcript_195804;Transcript_222368;Transcript_227696;Transcript_240530
GO:0031225	C:anchored_component_of_membrane_	80	7.62812e-08	Transcript_000368;Transcript_000434;Transcript_002488;Transcript_003638;Transcript_005655;Transcript_006953;Transcript_008678;Transcript_009442;Transcript_009542;Transcript_012404;Transcript_012910;Transcript_021680;Transcript_023052;Transcript_023903;Transcript_024022;Transcript_024251;Transcript_027546;Transcript_028287;Transcript_029104;Transcript_034983;Transcript_037676;Transcript_041922;Tra…
GO:0015629	C:actin_cytoskeleton_	13	0.172221	Transcript_012934;Transcript_015431;Transcript_019534;Transcript_094814;Transcript_112191;Transcript_175365;Transcript_192139;Transcript_197714;Transcript_201238;Transcript_208666;Transcript_226693;Transcript_233424;Transcript_238075
ko01210	2-Oxocarboxylic_acid_metabolism	30	6.0839e-05	Transcript_008700;Transcript_011172;Transcript_014765;Transcript_015673;Transcript_016804;Transcript_016816;Transcript_023212;Transcript_024584;Transcript_034831;Transcript_040344;Transcript_042399;Transcript_043070;Transcript_074888;Transcript_084580;Transcript_139088;Transcript_142023;Transcript_150032;Transcript_169815;Transcript_183003;Transcript_183183;Transcript_222132;Transcript_222398;Tra…
GO:0009960	P:endosperm_development	10	0.200714	Transcript_055391;Transcript_062906;Transcript_152118;Transcript_162129;Transcript_173748;Transcript_181955;Transcript_196132;Transcript_218059;Transcript_231717;Transcript_242034
GO:0000244	P:spliceosomal_tri-snRNP_complex_assembly	8	0.636311	Transcript_011217;Transcript_043873;Transcript_089683;Transcript_187896;Transcript_205045;Transcript_206492;Transcript_227922;Transcript_229688
GO:0009826	P:unidimensional_cell_growth	48	0.000979444	Transcript_006813;Transcript_012819;Transcript_020761;Transcript_020976;Transcript_028332;Transcript_028369;Transcript_036529;Transcript_042600;Transcript_044346;Transcript_049607;Transcript_050191;Transcript_054583;Transcript_058415;Transcript_065260;Transcript_074217;Transcript_074557;Transcript_076539;Transcript_078372;Transcript_091788;Transcript_100617;Transcript_104833;Transcript_137939;Tra…
GO:0015208	F:guanine_transmembrane_transporter_activity	3	0.7609	Transcript_015491;Transcript_023143;Transcript_029355
GO:0006417	P:regulation_of_translation	42	3.83549e-09	Transcript_001963;Transcript_007955;Transcript_008332;Transcript_013159;Transcript_027713;Transcript_028771;Transcript_042310;Transcript_042799;Transcript_046685;Transcript_052894;Transcript_068787;Transcript_078006;Transcript_084707;Transcript_110354;Transcript_130283;Transcript_133459;Transcript_136358;Transcript_139386;Transcript_151304;Transcript_152499;Transcript_154932;Transcript_155268;Tra…
GO:0050773	P:regulation_of_dendrite_development	2	0.190669	Transcript_090216;Transcript_234710
GO:0046566	F:DOPA_dioxygenase_activity	2	0.406345	Transcript_046535;Transcript_207755
GO:0035267	C:NuA4_histone_acetyltransferase_complex	5	0.0426106	Transcript_026055;Transcript_151128;Transcript_182959;Transcript_224231;Transcript_231597
GO:0009538	C:photosystem_I_reaction_center	4	0.00762391	Transcript_167087;Transcript_189838;Transcript_222191;Transcript_242300
GO:0019841	F:retinol_binding	2	1	Transcript_059959;Transcript_223881
GO:0009881	F:photoreceptor_activity	17	0.0774276	Transcript_017666;Transcript_026115;Transcript_029392;Transcript_035642;Transcript_045924;Transcript_109012;Transcript_153995;Transcript_167323;Transcript_193452;Transcript_194992;Transcript_204242;Transcript_229342;Transcript_230620;Transcript_231330;Transcript_241393;Transcript_244514;Transcript_244738
GO:0016992	F:lipoate_synthase_activity	2	0.343054	Transcript_240728;Transcript_242465
GO:0050152	F:omega-amidase_activity	2	1	Transcript_018160;Transcript_021238
GO:0005835	C:fatty_acid_synthase_complex	2	0.602246	Transcript_048031;Transcript_238341
GO:0070678	F:preprotein_binding	3	1	Transcript_019194;Transcript_028908;Transcript_062758
GO:0000338	P:protein_deneddylation	3	0.639444	Transcript_229494;Transcript_232277;Transcript_241383
GO:0009267	P:cellular_response_to_starvation	11	0.777903	Transcript_017225;Transcript_043981;Transcript_095600;Transcript_103493;Transcript_138761;Transcript_152417;Transcript_164757;Transcript_187619;Transcript_232706;Transcript_234243;Transcript_244245
ko00260	Glycine,_serine_and_threonine_metabolism	48	1.93062e-08	Transcript_001574;Transcript_001944;Transcript_011997;Transcript_014643;Transcript_014765;Transcript_016709;Transcript_016946;Transcript_017990;Transcript_026348;Transcript_041676;Transcript_043020;Transcript_073685;Transcript_083652;Transcript_092038;Transcript_093453;Transcript_098122;Transcript_107327;Transcript_114879;Transcript_122216;Transcript_131552;Transcript_149311;Transcript_150940;Tra…
GO:0045297	P:post-mating_behavior	3	0.303101	Transcript_077480;Transcript_161784;Transcript_191404
GO:0015299	F:solute:proton_antiporter_activity	25	0.00166052	Transcript_002649;Transcript_004502;Transcript_006710;Transcript_017321;Transcript_025479;Transcript_042995;Transcript_060031;Transcript_168034;Transcript_173190;Transcript_173478;Transcript_173600;Transcript_174219;Transcript_175523;Transcript_203255;Transcript_204015;Transcript_211469;Transcript_223044;Transcript_229365;Transcript_230671;Transcript_232296;Transcript_235568;Transcript_235816;Tra…
GO:0034047	P:regulation_of_protein_phosphatase_type_2A_activity	6	0.404187	Transcript_001012;Transcript_007585;Transcript_044004;Transcript_184912;Transcript_194208;Transcript_222223
GO:0000209	P:protein_polyubiquitination	25	5.14158e-05	Transcript_006281;Transcript_009408;Transcript_010014;Transcript_028938;Transcript_034028;Transcript_045333;Transcript_049826;Transcript_117708;Transcript_123520;Transcript_146634;Transcript_156525;Transcript_158365;Transcript_159466;Transcript_176604;Transcript_181272;Transcript_188899;Transcript_203178;Transcript_207354;Transcript_224368;Transcript_224633;Transcript_225125;Transcript_232675;Tra…
GO:0009086	P:methionine_biosynthetic_process	18	0.0705935	Transcript_000056;Transcript_017085;Transcript_019193;Transcript_021853;Transcript_026945;Transcript_045644;Transcript_098122;Transcript_150886;Transcript_206741;Transcript_207470;Transcript_214966;Transcript_222033;Transcript_222717;Transcript_224126;Transcript_230812;Transcript_234396;Transcript_236752;Transcript_242986
GO:0061630	F:ubiquitin_protein_ligase_activity	53	0.000311353	Transcript_000563;Transcript_001505;Transcript_006281;Transcript_007006;Transcript_008537;Transcript_008597;Transcript_011369;Transcript_013885;Transcript_018951;Transcript_022626;Transcript_028661;Transcript_028938;Transcript_031597;Transcript_032009;Transcript_043216;Transcript_044011;Transcript_045036;Transcript_045333;Transcript_047081;Transcript_049461;Transcript_056491;Transcript_062009;Tra…
GO:0045019	P:negative_regulation_of_nitric_oxide_biosynthetic_process	2	1	Transcript_087523;Transcript_183236
GO:0008066	F:glutamate_receptor_activity	9	0.185222	Transcript_017373;Transcript_045444;Transcript_053463;Transcript_147654;Transcript_172493;Transcript_181118;Transcript_225982;Transcript_227132;Transcript_232512
GO:0042176	P:regulation_of_protein_catabolic_process	7	0.0971538	Transcript_102815;Transcript_103640;Transcript_147794;Transcript_149725;Transcript_160959;Transcript_233626;Transcript_233852
GO:0004540	F:ribonuclease_activity	8	0.00800864	Transcript_004862;Transcript_016600;Transcript_017180;Transcript_028366;Transcript_044536;Transcript_226266;Transcript_226955;Transcript_234470
GO:0003721	F:telomeric_template_RNA_reverse_transcriptase_activity	2	0.281171	Transcript_044881;Transcript_233446
GO:0080075	F:spermidine:feruloyl_CoA_N-acyltransferase_activity	9	0.326959	Transcript_006017;Transcript_017645;Transcript_057799;Transcript_078594;Transcript_100864;Transcript_169290;Transcript_220227;Transcript_233355;Transcript_243266
GO:0007186	P:G-protein_coupled_receptor_signaling_pathway	5	0.571511	Transcript_017284;Transcript_031596;Transcript_124083;Transcript_228016;Transcript_230437
GO:0007294	P:germarium-derived_oocyte_fate_determination	2	0.776635	Transcript_026391;Transcript_186849
GO:0089709	P:L-histidine_transmembrane_transport	6	1	Transcript_009968;Transcript_090893;Transcript_130814;Transcript_161004;Transcript_201742;Transcript_236224
GO:0047429	F:nucleoside-triphosphate_diphosphatase_activity	3	1	Transcript_008093;Transcript_181901;Transcript_234539
GO:0010067	P:procambium_histogenesis	5	0.46668	Transcript_008282;Transcript_027935;Transcript_163320;Transcript_222612;Transcript_229020
GO:0004167	F:dopachrome_isomerase_activity	4	0.433453	Transcript_025197;Transcript_043104;Transcript_223808;Transcript_240264
GO:0008175	F:tRNA_methyltransferase_activity	2	0.602246	Transcript_045976;Transcript_148832
GO:0006809	P:nitric_oxide_biosynthetic_process	5	0.189325	Transcript_195860;Transcript_222613;Transcript_224732;Transcript_233846;Transcript_243855
GO:0015294	F:solute:cation_symporter_activity	3	0.7609	Transcript_015491;Transcript_023143;Transcript_029355
GO:0043433	P:negative_regulation_of_sequence-specific_DNA_binding_transcription_factor_activity	4	0.211787	Transcript_027078;Transcript_044013;Transcript_093706;Transcript_225027
GO:0051168	P:nuclear_export	2	1	Transcript_007619;Transcript_231950
GO:0071215	P:cellular_response_to_abscisic_acid_stimulus	16	0.0181429	Transcript_003470;Transcript_018802;Transcript_034581;Transcript_042489;Transcript_087023;Transcript_092599;Transcript_093993;Transcript_161473;Transcript_175126;Transcript_177185;Transcript_219145;Transcript_229195;Transcript_236709;Transcript_238686;Transcript_242773;Transcript_244302
GO:0022028	P:tangential_migration_from_the_subventricular_zone_to_the_olfactory_bulb	2	0.281171	Transcript_053448;Transcript_097665
GO:0009682	P:induced_systemic_resistance	2	0.0083522	Transcript_022180;Transcript_243602
GO:0015140	F:malate_transmembrane_transporter_activity	2	0.0412318	Transcript_139724;Transcript_228463
GO:0004655	F:porphobilinogen_synthase_activity	3	0.471648	Transcript_007719;Transcript_177693;Transcript_229809
GO:0070475	P:rRNA_base_methylation	3	1	Transcript_045163;Transcript_104913;Transcript_176012
GO:0030970	P:retrograde_protein_transport,_ER_to_cytosol	7	0.209676	Transcript_029507;Transcript_043267;Transcript_150319;Transcript_185466;Transcript_201233;Transcript_223185;Transcript_243895
GO:0002161	F:aminoacyl-tRNA_editing_activity	9	0.0648237	Transcript_018121;Transcript_048604;Transcript_052947;Transcript_072501;Transcript_114291;Transcript_125255;Transcript_210798;Transcript_224760;Transcript_232565
GO:0010226	P:response_to_lithium_ion	2	1	Transcript_228557;Transcript_234734
GO:0009901	P:anther_dehiscence	9	0.188	Transcript_023102;Transcript_095600;Transcript_131178;Transcript_157364;Transcript_202542;Transcript_225280;Transcript_226286;Transcript_229910;Transcript_244245
GO:0050687	P:negative_regulation_of_defense_response_to_virus	2	1	Transcript_006795;Transcript_229927
GO:0009399	P:nitrogen_fixation	6	1	Transcript_018746;Transcript_052921;Transcript_159737;Transcript_175856;Transcript_178251;Transcript_193635
GO:0000285	F:1-phosphatidylinositol-3-phosphate_5-kinase_activity	5	0.0701666	Transcript_005928;Transcript_008140;Transcript_088132;Transcript_175969;Transcript_222019
GO:0009504	C:cell_plate_	12	0.000564287	Transcript_009045;Transcript_016524;Transcript_019030;Transcript_026483;Transcript_031584;Transcript_048938;Transcript_103207;Transcript_154881;Transcript_181910;Transcript_192519;Transcript_230696;Transcript_240790
GO:0007517	P:muscle_organ_development	11	0.101088	Transcript_036623;Transcript_056952;Transcript_176325;Transcript_180285;Transcript_184391;Transcript_187863;Transcript_199494;Transcript_210991;Transcript_224851;Transcript_230454;Transcript_239972
GO:0009295	C:nucleoid	6	0.134191	Transcript_118184;Transcript_187753;Transcript_223131;Transcript_233833;Transcript_236980;Transcript_241511
GO:0004506	F:squalene_monooxygenase_activity	3	0.805419	Transcript_000367;Transcript_000988;Transcript_090633
GO:0042407	P:cristae_formation	2	1	Transcript_150115;Transcript_198760
GO:0071329	P:cellular_response_to_sucrose_stimulus	2	0.0565074	Transcript_090732;Transcript_238765
GO:0085030	P:mutualism	5	0.696697	Transcript_121700;Transcript_129485;Transcript_140401;Transcript_173578;Transcript_219358
GO:0004735	F:pyrroline-5-carboxylate_reductase_activity	2	1	Transcript_087369;Transcript_159688
GO:0005797	C:Golgi_medial_cisterna	7	0.352837	Transcript_007379;Transcript_008292;Transcript_135521;Transcript_156538;Transcript_180845;Transcript_181244;Transcript_223301
GO:0052544	P:defense_response_by_callose_deposition_in_cell_wall	9	0.0408201	Transcript_001411;Transcript_013227;Transcript_043940;Transcript_132647;Transcript_158984;Transcript_166916;Transcript_169458;Transcript_183183;Transcript_233591
GO:0008835	F:diaminohydroxyphosphoribosylaminopyrimidine_deaminase_activity	3	0.393222	Transcript_101598;Transcript_204443;Transcript_227098
GO:0006868	P:glutamine_transport	5	0.46668	Transcript_009968;Transcript_103108;Transcript_161004;Transcript_201742;Transcript_236224
GO:1901601	P:strigolactone_biosynthetic_process	6	1	Transcript_050224;Transcript_130082;Transcript_160759;Transcript_173489;Transcript_239850;Transcript_240254
GO:0005996	P:monosaccharide_metabolic_process	4	0.563109	Transcript_021548;Transcript_043848;Transcript_162817;Transcript_217493
GO:0008289	F:lipid_binding_	69	4.42299e-08	Transcript_002736;Transcript_005011;Transcript_005655;Transcript_005803;Transcript_006577;Transcript_006876;Transcript_011706;Transcript_012404;Transcript_015884;Transcript_015912;Transcript_016485;Transcript_018202;Transcript_024022;Transcript_026306;Transcript_026942;Transcript_028778;Transcript_030458;Transcript_035784;Transcript_036601;Transcript_042991;Transcript_043334;Transcript_051862;Tra…
GO:0034641	P:cellular_nitrogen_compound_metabolic_process	7	0.290863	Transcript_015457;Transcript_087369;Transcript_155159;Transcript_184433;Transcript_192739;Transcript_215175;Transcript_225125
ko04662	B_cell_receptor_signaling_pathway	25	0.0777439	Transcript_004137;Transcript_010012;Transcript_012094;Transcript_013798;Transcript_021853;Transcript_024575;Transcript_033023;Transcript_043118;Transcript_058863;Transcript_059039;Transcript_072106;Transcript_092873;Transcript_150338;Transcript_150886;Transcript_162158;Transcript_172586;Transcript_207470;Transcript_223900;Transcript_224126;Transcript_230020;Transcript_230696;Transcript_231953;Tra…
GO:0008270	F:zinc_ion_binding	571	1.08623e-62	Transcript_000056;Transcript_000563;Transcript_002459;Transcript_002509;Transcript_003093;Transcript_003366;Transcript_004149;Transcript_004300;Transcript_004402;Transcript_004822;Transcript_004905;Transcript_005350;Transcript_005845;Transcript_005856;Transcript_005938;Transcript_006502;Transcript_007079;Transcript_007081;Transcript_007083;Transcript_007130;Transcript_007367;Transcript_007576;Tra…
GO:0010401	P:pectic_galactan_metabolic_process	2	0.695033	Transcript_030722;Transcript_128697
GO:0046512	P:sphingosine_biosynthetic_process	3	0.102019	Transcript_158638;Transcript_222067;Transcript_231949
GO:0043178	F:alcohol_binding	3	0.527991	Transcript_023970;Transcript_031084;Transcript_235176
GO:0006552	P:leucine_catabolic_process	2	0.343054	Transcript_054391;Transcript_096846
ko00730	Thiamine_metabolism	10	0.110659	Transcript_015169;Transcript_026947;Transcript_037319;Transcript_048064;Transcript_069394;Transcript_072950;Transcript_226851;Transcript_231879;Transcript_243474;Transcript_244605
GO:0080111	P:DNA_demethylation	5	0.575187	Transcript_017511;Transcript_161801;Transcript_224103;Transcript_238771;Transcript_241156
GO:0007420	P:brain_development	4	0.0138474	Transcript_014861;Transcript_034880;Transcript_221863;Transcript_228725
GO:0005179	F:hormone_activity	3	0.0237529	Transcript_042294;Transcript_147433;Transcript_233390
GO:0016233	P:telomere_capping	3	0.527991	Transcript_028690;Transcript_196769;Transcript_242714
GO:0031965	C:nuclear_membrane_	35	2.84091e-05	Transcript_005215;Transcript_007619;Transcript_013885;Transcript_016621;Transcript_019653;Transcript_022761;Transcript_025106;Transcript_025645;Transcript_028330;Transcript_030364;Transcript_032009;Transcript_040488;Transcript_048383;Transcript_073547;Transcript_087523;Transcript_095175;Transcript_096602;Transcript_114233;Transcript_137357;Transcript_151752;Transcript_158395;Transcript_159833;Tra…
GO:0019003	F:GDP_binding	3	0.0588541	Transcript_032598;Transcript_093222;Transcript_225445
GO:0004129	F:cytochrome-c_oxidase_activity	16	0.000190941	Transcript_006066;Transcript_026011;Transcript_026324;Transcript_028552;Transcript_049612;Transcript_080132;Transcript_090790;Transcript_113165;Transcript_114355;Transcript_114423;Transcript_141001;Transcript_169871;Transcript_170158;Transcript_207751;Transcript_224588;Transcript_239881
GO:0005622	C:intracellular_	99	4.17285e-11	Transcript_001411;Transcript_002637;Transcript_002815;Transcript_003783;Transcript_006068;Transcript_006668;Transcript_007356;Transcript_008288;Transcript_008729;Transcript_009323;Transcript_009339;Transcript_011523;Transcript_013227;Transcript_013378;Transcript_016138;Transcript_017373;Transcript_017666;Transcript_018430;Transcript_023404;Transcript_024575;Transcript_024829;Transcript_026115;Tra…
GO:0005985	P:sucrose_metabolic_process	7	0.00118028	Transcript_047563;Transcript_094240;Transcript_095065;Transcript_150787;Transcript_165741;Transcript_169532;Transcript_189041
GO:0006364	P:rRNA_processing	66	8.4782e-09	Transcript_003601;Transcript_005159;Transcript_006216;Transcript_007368;Transcript_008914;Transcript_009427;Transcript_012170;Transcript_017081;Transcript_017180;Transcript_017203;Transcript_021548;Transcript_022320;Transcript_027627;Transcript_030389;Transcript_031071;Transcript_031732;Transcript_032315;Transcript_044536;Transcript_069210;Transcript_076266;Transcript_078992;Transcript_084874;Tra…
GO:0019538	P:protein_metabolic_process	5	0.0323053	Transcript_018753;Transcript_019420;Transcript_106287;Transcript_150930;Transcript_232064
GO:0048489	P:synaptic_vesicle_transport	2	1	Transcript_067433;Transcript_222162
GO:0016049	P:cell_growth	21	0.138383	Transcript_003093;Transcript_003601;Transcript_011213;Transcript_012910;Transcript_021680;Transcript_023052;Transcript_025560;Transcript_038402;Transcript_045691;Transcript_055390;Transcript_091277;Transcript_099656;Transcript_151890;Transcript_191113;Transcript_224594;Transcript_226311;Transcript_226538;Transcript_228244;Transcript_234610;Transcript_236936;Transcript_244041
GO:0044281	P:small_molecule_metabolic_process	38	0.00100442	Transcript_003866;Transcript_010202;Transcript_012922;Transcript_015354;Transcript_015457;Transcript_018859;Transcript_022357;Transcript_036692;Transcript_038714;Transcript_040279;Transcript_043070;Transcript_087369;Transcript_098425;Transcript_120546;Transcript_127755;Transcript_137297;Transcript_155159;Transcript_155875;Transcript_160755;Transcript_180845;Transcript_183007;Transcript_184433;Tra…
GO:0008333	P:endosome_to_lysosome_transport	3	0.506334	Transcript_026544;Transcript_141494;Transcript_233779
GO:0010102	P:lateral_root_morphogenesis_	10	0.00725813	Transcript_018722;Transcript_043228;Transcript_054227;Transcript_060579;Transcript_123186;Transcript_153853;Transcript_219618;Transcript_228603;Transcript_233846;Transcript_239373
GO:0003849	F:3-deoxy-7-phosphoheptulonate_synthase_activity	4	0.125711	Transcript_006888;Transcript_137532;Transcript_155915;Transcript_235566
GO:0046716	P:muscle_cell_cellular_homeostasis	5	0.571511	Transcript_036623;Transcript_067433;Transcript_164757;Transcript_180285;Transcript_222162
GO:0034969	P:histone_arginine_methylation	4	0.544577	Transcript_014508;Transcript_135318;Transcript_164713;Transcript_226246
ko05219	Bladder_cancer	6	0.0520104	Transcript_024575;Transcript_033023;Transcript_072106;Transcript_223900;Transcript_230696;Transcript_240310
ko04924	Renin_secretion	7	0.0104471	Transcript_010012;Transcript_012094;Transcript_018125;Transcript_059039;Transcript_092873;Transcript_201430;Transcript_241854
GO:0005844	C:polysome	7	0.00362049	Transcript_075492;Transcript_082693;Transcript_118791;Transcript_137939;Transcript_153368;Transcript_243141;Transcript_243207
GO:0030054	C:cell_junction_	15	0.0448448	Transcript_005305;Transcript_007798;Transcript_014711;Transcript_034028;Transcript_045070;Transcript_136940;Transcript_149157;Transcript_154171;Transcript_208666;Transcript_218491;Transcript_224770;Transcript_226324;Transcript_228959;Transcript_229987;Transcript_243788
GO:0034976	P:response_to_endoplasmic_reticulum_stress	16	0.0181429	Transcript_002621;Transcript_003891;Transcript_013384;Transcript_029022;Transcript_036904;Transcript_041161;Transcript_043374;Transcript_043793;Transcript_107188;Transcript_164701;Transcript_182620;Transcript_184826;Transcript_223555;Transcript_227688;Transcript_229854;Transcript_231538
GO:0016042	P:lipid_catabolic_process	75	1.97065e-07	Transcript_004006;Transcript_005637;Transcript_005890;Transcript_008926;Transcript_011639;Transcript_013413;Transcript_016943;Transcript_019393;Transcript_023308;Transcript_025001;Transcript_029041;Transcript_031734;Transcript_033032;Transcript_033896;Transcript_041988;Transcript_042373;Transcript_064311;Transcript_068663;Transcript_070166;Transcript_075423;Transcript_095376;Transcript_097442;Tra…
GO:0016730	F:oxidoreductase_activity,_acting_on_iron-sulfur_proteins_as_donors	2	1	Transcript_058956;Transcript_101984
GO:0080175	P:phragmoplast_microtubule_organization	3	0.805419	Transcript_014434;Transcript_015213;Transcript_153202
GO:1990190	F:peptide-glutamate-N-acetyltransferase_activity	4	0.159854	Transcript_011202;Transcript_028397;Transcript_049200;Transcript_237265
GO:0051276	P:chromosome_organization	6	0.658521	Transcript_042489;Transcript_044881;Transcript_087023;Transcript_187863;Transcript_199763;Transcript_233446
GO:0046822	P:regulation_of_nucleocytoplasmic_transport	2	0.406345	Transcript_017235;Transcript_197443
GO:0033862	F:UMP_kinase_activity	5	1	Transcript_022938;Transcript_029605;Transcript_047326;Transcript_213733;Transcript_227205
GO:0006811	P:ion_transport	31	1.23062e-05	Transcript_014043;Transcript_017679;Transcript_018449;Transcript_021189;Transcript_029334;Transcript_029721;Transcript_030702;Transcript_037268;Transcript_043286;Transcript_079903;Transcript_135394;Transcript_151833;Transcript_152896;Transcript_153323;Transcript_155917;Transcript_156103;Transcript_161004;Transcript_169023;Transcript_173499;Transcript_181292;Transcript_189321;Transcript_199763;Tra…
GO:0045178	C:basal_part_of_cell_	4	0.783799	Transcript_011795;Transcript_059959;Transcript_223881;Transcript_240329
GO:0033179	C:proton-transporting_V-type_ATPase,_V0_domain	9	0.0158617	Transcript_049187;Transcript_080670;Transcript_096473;Transcript_146537;Transcript_160470;Transcript_185393;Transcript_225776;Transcript_227505;Transcript_235041
GO:0045037	P:protein_import_into_chloroplast_stroma	6	0.596737	Transcript_024829;Transcript_029721;Transcript_184641;Transcript_202786;Transcript_236960;Transcript_242478
GO:0008201	F:heparin_binding	2	0.0161315	Transcript_033896;Transcript_165273
GO:0008543	P:fibroblast_growth_factor_receptor_signaling_pathway	2	1	Transcript_161316;Transcript_172586
GO:0050297	F:stizolobate_synthase_activity	2	0.406345	Transcript_046535;Transcript_207755
GO:0006650	P:glycerophospholipid_metabolic_process	2	1	Transcript_104660;Transcript_238146
GO:0070050	P:neuron_cellular_homeostasis	3	0.527991	Transcript_067433;Transcript_158254;Transcript_222162
GO:0006610	P:ribosomal_protein_import_into_nucleus	4	0.79695	Transcript_028902;Transcript_220498;Transcript_223230;Transcript_226718
GO:0052895	F:N1-acetylspermine:oxygen_oxidoreductase_(N1-acetylspermidine-forming)_activity	3	1	Transcript_223699;Transcript_238035;Transcript_240725
GO:0052822	F:DNA-3-methylguanine_glycosylase_activity	3	1	Transcript_012325;Transcript_167757;Transcript_237865
GO:0042800	F:histone_methyltransferase_activity_(H3-K4_specific)	2	0.14426	Transcript_009114;Transcript_168582
GO:0010582	P:floral_meristem_determinacy	5	0.840345	Transcript_031201;Transcript_042344;Transcript_196830;Transcript_228679;Transcript_236419
GO:0042578	F:phosphoric_ester_hydrolase_activity	6	0.169485	Transcript_006855;Transcript_012118;Transcript_035544;Transcript_080546;Transcript_237004;Transcript_242674
GO:0006356	P:regulation_of_transcription_from_RNA_polymerase_I_promoter	2	0.695033	Transcript_042172;Transcript_140236
GO:0048813	P:dendrite_morphogenesis	6	0.0652015	Transcript_056952;Transcript_181944;Transcript_187863;Transcript_210991;Transcript_217583;Transcript_234710
GO:0009626	P:plant-type_hypersensitive_response	57	7.66989e-09	Transcript_002509;Transcript_003321;Transcript_007081;Transcript_011480;Transcript_015314;Transcript_016633;Transcript_017369;Transcript_021381;Transcript_022180;Transcript_024268;Transcript_025957;Transcript_027731;Transcript_028584;Transcript_029005;Transcript_030682;Transcript_031644;Transcript_040451;Transcript_041570;Transcript_043925;Transcript_044014;Transcript_044627;Transcript_045038;Tra…
GO:1903538	P:regulation_of_meiotic_cell_cycle_process_involved_in_oocyte_maturation	2	0.154885	Transcript_133924;Transcript_227790
GO:0006556	P:S-adenosylmethionine_biosynthetic_process	3	0.00199888	Transcript_030903;Transcript_194533;Transcript_222314
GO:0004421	F:hydroxymethylglutaryl-CoA_synthase_activity	3	0.393222	Transcript_034880;Transcript_217321;Transcript_230167
ko00190	Oxidative_phosphorylation	98	7.96612e-15	Transcript_002006;Transcript_002196;Transcript_009645;Transcript_009683;Transcript_009685;Transcript_013503;Transcript_017330;Transcript_018182;Transcript_020229;Transcript_020239;Transcript_023792;Transcript_026011;Transcript_032043;Transcript_034232;Transcript_038520;Transcript_042963;Transcript_043038;Transcript_043609;Transcript_043638;Transcript_044547;Transcript_044798;Transcript_049612;Tra…
GO:0015867	P:ATP_transport	5	0.00608238	Transcript_017733;Transcript_067433;Transcript_199342;Transcript_222162;Transcript_235812
GO:0010311	P:lateral_root_formation	11	3.81904e-05	Transcript_005717;Transcript_009590;Transcript_013972;Transcript_014548;Transcript_016556;Transcript_019187;Transcript_033023;Transcript_141463;Transcript_223900;Transcript_229566;Transcript_230686
GO:0005801	C:cis-Golgi_network_	11	0.00201001	Transcript_001104;Transcript_001319;Transcript_007379;Transcript_008292;Transcript_032776;Transcript_037851;Transcript_135521;Transcript_156538;Transcript_181244;Transcript_189041;Transcript_223301
GO:0048439	P:flower_morphogenesis	4	0.79695	Transcript_006567;Transcript_042344;Transcript_236419;Transcript_244601
GO:0006826	P:iron_ion_transport	4	0.0427763	Transcript_028064;Transcript_034761;Transcript_100725;Transcript_226341
GO:0032366	P:intracellular_sterol_transport	2	0.154885	Transcript_232616;Transcript_237529
ko05166	HTLV-I_infection	53	1.99969e-09	Transcript_002482;Transcript_004137;Transcript_006445;Transcript_007259;Transcript_007391;Transcript_007619;Transcript_008449;Transcript_008964;Transcript_010012;Transcript_012094;Transcript_013798;Transcript_017841;Transcript_018889;Transcript_022674;Transcript_024036;Transcript_026483;Transcript_029746;Transcript_044881;Transcript_045319;Transcript_047526;Transcript_059039;Transcript_062654;Tra…
GO:0019673	P:GDP-mannose_metabolic_process	5	0.443438	Transcript_023970;Transcript_031084;Transcript_042600;Transcript_170549;Transcript_235176
GO:0006730	P:one-carbon_metabolic_process	10	4.73981e-07	Transcript_017707;Transcript_030903;Transcript_035914;Transcript_057252;Transcript_073459;Transcript_073685;Transcript_160742;Transcript_194533;Transcript_222314;Transcript_238792
GO:0035060	C:brahma_complex_	2	0.281171	Transcript_009220;Transcript_210991
ko00072	Synthesis_and_degradation_of_ketone_bodies	7	0.0232054	Transcript_034880;Transcript_154295;Transcript_211291;Transcript_213391;Transcript_217321;Transcript_224177;Transcript_230167
GO:0046855	P:inositol_phosphate_dephosphorylation	8	0.537299	Transcript_004615;Transcript_018281;Transcript_025816;Transcript_027976;Transcript_035784;Transcript_112814;Transcript_232439;Transcript_239699
GO:0008138	F:protein_tyrosine/serine/threonine_phosphatase_activity	14	0.0115178	Transcript_004615;Transcript_027976;Transcript_032156;Transcript_035784;Transcript_043306;Transcript_095400;Transcript_112814;Transcript_141980;Transcript_154120;Transcript_156316;Transcript_214445;Transcript_232439;Transcript_235705;Transcript_239699
GO:0019253	P:reductive_pentose-phosphate_cycle	13	0.000709548	Transcript_001784;Transcript_005159;Transcript_008216;Transcript_009141;Transcript_022259;Transcript_025230;Transcript_079851;Transcript_102074;Transcript_152864;Transcript_174797;Transcript_232012;Transcript_235570;Transcript_241326
GO:0000082	P:G1/S_transition_of_mitotic_cell_cycle	8	0.0279961	Transcript_006068;Transcript_023949;Transcript_140079;Transcript_142487;Transcript_215504;Transcript_225125;Transcript_230162;Transcript_238433
GO:0006207	P:'de_novo'_pyrimidine_nucleobase_biosynthetic_process	7	0.15452	Transcript_014669;Transcript_028613;Transcript_033495;Transcript_043956;Transcript_123290;Transcript_160105;Transcript_219996
GO:0016866	F:intramolecular_transferase_activity	13	0.461198	Transcript_005015;Transcript_014494;Transcript_015198;Transcript_026240;Transcript_028033;Transcript_029654;Transcript_031055;Transcript_092585;Transcript_102196;Transcript_128450;Transcript_136908;Transcript_195312;Transcript_223872
GO:0090382	P:phagosome_maturation	3	0.7609	Transcript_017876;Transcript_173643;Transcript_235041
GO:0017144	P:drug_metabolic_process	8	1	Transcript_003866;Transcript_040279;Transcript_098425;Transcript_120546;Transcript_155875;Transcript_231033;Transcript_231455;Transcript_233435
GO:0071277	P:cellular_response_to_calcium_ion	8	0.537299	Transcript_041863;Transcript_042555;Transcript_075816;Transcript_159565;Transcript_166714;Transcript_169791;Transcript_228996;Transcript_242487
GO:0046166	P:glyceraldehyde-3-phosphate_biosynthetic_process	2	0.281171	Transcript_022259;Transcript_079851
GO:0005890	C:sodium:potassium-exchanging_ATPase_complex	2	0.406345	Transcript_062378;Transcript_202986
GO:0042775	P:mitochondrial_ATP_synthesis_coupled_electron_transport	2	1	Transcript_055848;Transcript_115388
GO:0006888	P:ER_to_Golgi_vesicle-mediated_transport	34	1.10192e-06	Transcript_001104;Transcript_008147;Transcript_008375;Transcript_015058;Transcript_017948;Transcript_018541;Transcript_030141;Transcript_032776;Transcript_033802;Transcript_035044;Transcript_039015;Transcript_044030;Transcript_120684;Transcript_127350;Transcript_137297;Transcript_149696;Transcript_154901;Transcript_158918;Transcript_161644;Transcript_165340;Transcript_174319;Transcript_184894;Tra…
GO:0004066	F:asparagine_synthase_(glutamine-hydrolyzing)_activity_	4	0.0750029	Transcript_077883;Transcript_128521;Transcript_225098;Transcript_226879
GO:0007205	P:protein_kinase_C-activating_G-protein_coupled_receptor_signaling_pathway	5	0.09118	Transcript_089375;Transcript_106890;Transcript_165066;Transcript_210673;Transcript_227371
GO:0031154	P:culmination_involved_in_sorocarp_development	2	0.595334	Transcript_170217;Transcript_181040
ko00514	Other_types_of_O-glycan_biosynthesis	5	0.304333	Transcript_008419;Transcript_161886;Transcript_193833;Transcript_225507;Transcript_227127
GO:0009821	P:alkaloid_biosynthetic_process	2	0.776635	Transcript_042305;Transcript_073235
GO:0005652	C:nuclear_lamina	3	1	Transcript_005215;Transcript_098359;Transcript_235808
GO:0009814	P:defense_response,_incompatible_interaction	10	0.0119464	Transcript_017369;Transcript_024575;Transcript_027278;Transcript_120078;Transcript_159934;Transcript_199197;Transcript_206305;Transcript_221964;Transcript_226917;Transcript_243313
GO:0071025	P:RNA_surveillance	2	0.154885	Transcript_142642;Transcript_227110
GO:0004372	F:glycine_hydroxymethyltransferase_activity	6	0.00812199	Transcript_028630;Transcript_073685;Transcript_155159;Transcript_195239;Transcript_206305;Transcript_241912
GO:0009867	P:jasmonic_acid_mediated_signaling_pathway	25	0.0067601	Transcript_005159;Transcript_016768;Transcript_023102;Transcript_024829;Transcript_037982;Transcript_041727;Transcript_068885;Transcript_130283;Transcript_131178;Transcript_142254;Transcript_149776;Transcript_150413;Transcript_157364;Transcript_184641;Transcript_201368;Transcript_202542;Transcript_225061;Transcript_225280;Transcript_227824;Transcript_229192;Transcript_230080;Transcript_233846;Tra…
GO:0010248	P:establishment_or_maintenance_of_transmembrane_electrochemical_gradient	2	0.281171	Transcript_025532;Transcript_184088
GO:0009958	P:positive_gravitropism	11	0.0111512	Transcript_019242;Transcript_028401;Transcript_042002;Transcript_073404;Transcript_150338;Transcript_160420;Transcript_186151;Transcript_186370;Transcript_187370;Transcript_205465;Transcript_234332
GO:0031593	F:polyubiquitin_binding	11	0.0429592	Transcript_026456;Transcript_031485;Transcript_043987;Transcript_052040;Transcript_060015;Transcript_166700;Transcript_217819;Transcript_229571;Transcript_237091;Transcript_240189;Transcript_243895
GO:2001234	P:negative_regulation_of_apoptotic_signaling_pathway	2	0.154885	Transcript_149157;Transcript_225231
GO:0009650	P:UV_protection	3	0.303101	Transcript_020407;Transcript_030846;Transcript_232749
GO:0004872	F:receptor_activity	16	0.173473	Transcript_001724;Transcript_003076;Transcript_006967;Transcript_012288;Transcript_020405;Transcript_026520;Transcript_030348;Transcript_032858;Transcript_123465;Transcript_136284;Transcript_152339;Transcript_164557;Transcript_172327;Transcript_196770;Transcript_229684;Transcript_235380
GO:0005537	F:mannose_binding_	3	1	Transcript_023970;Transcript_031084;Transcript_235176
GO:0006402	P:mRNA_catabolic_process	13	0.337626	Transcript_003321;Transcript_008914;Transcript_009427;Transcript_082693;Transcript_093207;Transcript_094954;Transcript_137939;Transcript_141279;Transcript_168089;Transcript_183290;Transcript_193051;Transcript_212971;Transcript_222553
GO:0008685	F:2-C-methyl-D-erythritol_2,4-cyclodiphosphate_synthase_activity	4	0.367155	Transcript_194458;Transcript_195995;Transcript_231115;Transcript_235992
GO:0000045	P:autophagosome_assembly	18	0.0276351	Transcript_009564;Transcript_034564;Transcript_043173;Transcript_056825;Transcript_059638;Transcript_087040;Transcript_093969;Transcript_104899;Transcript_112191;Transcript_130774;Transcript_161919;Transcript_166609;Transcript_181040;Transcript_186342;Transcript_202796;Transcript_224639;Transcript_229224;Transcript_239319
GO:0008757	F:S-adenosylmethionine-dependent_methyltransferase_activity	11	0.00539441	Transcript_013262;Transcript_014046;Transcript_018787;Transcript_024662;Transcript_050557;Transcript_064185;Transcript_148832;Transcript_175774;Transcript_225531;Transcript_228160;Transcript_236664
GO:0000733	P:DNA_strand_renaturation	3	1	Transcript_078881;Transcript_166381;Transcript_244616
GO:0017157	P:regulation_of_exocytosis	4	0.0138474	Transcript_008169;Transcript_021496;Transcript_030514;Transcript_093222
GO:0047117	F:enoyl-acyl-carrier-protein_reductase_(NADPH,_A-specific)_activity	4	0.79695	Transcript_066148;Transcript_127755;Transcript_155023;Transcript_189857
GO:0005355	F:glucose_transmembrane_transporter_activity	10	0.00268457	Transcript_005717;Transcript_037099;Transcript_042078;Transcript_062194;Transcript_091344;Transcript_110733;Transcript_150379;Transcript_228898;Transcript_231756;Transcript_236357
GO:0007064	P:mitotic_sister_chromatid_cohesion	5	0.619411	Transcript_031363;Transcript_059046;Transcript_188455;Transcript_212650;Transcript_225968
GO:0006974	P:cellular_response_to_DNA_damage_stimulus	34	1.02623e-05	Transcript_012934;Transcript_021722;Transcript_022196;Transcript_029211;Transcript_031485;Transcript_034710;Transcript_042145;Transcript_042489;Transcript_042637;Transcript_043973;Transcript_057067;Transcript_062009;Transcript_070040;Transcript_085304;Transcript_087023;Transcript_105037;Transcript_166381;Transcript_166700;Transcript_170938;Transcript_188899;Transcript_190556;Transcript_196318;Tra…
GO:0006409	P:tRNA_export_from_nucleus	2	1	Transcript_062313;Transcript_203080
GO:0016282	C:eukaryotic_43S_preinitiation_complex_	21	0.00280041	Transcript_005862;Transcript_027137;Transcript_031078;Transcript_042090;Transcript_042480;Transcript_053540;Transcript_122362;Transcript_143419;Transcript_151486;Transcript_157065;Transcript_161069;Transcript_224747;Transcript_224892;Transcript_226346;Transcript_230763;Transcript_233021;Transcript_238376;Transcript_239262;Transcript_241862;Transcript_243256;Transcript_244379
GO:0048387	P:negative_regulation_of_retinoic_acid_receptor_signaling_pathway	4	0.783799	Transcript_007955;Transcript_013502;Transcript_197185;Transcript_222281
GO:0050200	F:plasmalogen_synthase_activity	2	0.256238	Transcript_126207;Transcript_243697
GO:0017038	P:protein_import	2	1	Transcript_234622;Transcript_235727
GO:0007131	P:reciprocal_meiotic_recombination	10	0.038342	Transcript_016457;Transcript_023059;Transcript_024322;Transcript_161971;Transcript_167419;Transcript_221925;Transcript_237928;Transcript_240714;Transcript_242155;Transcript_244636
GO:0070370	P:cellular_heat_acclimation	8	0.0272677	Transcript_016577;Transcript_019066;Transcript_019734;Transcript_086606;Transcript_099914;Transcript_137939;Transcript_188379;Transcript_213205
GO:0007165	P:signal_transduction	67	1.82227e-09	Transcript_003453;Transcript_003528;Transcript_004322;Transcript_004955;Transcript_005301;Transcript_006433;Transcript_006813;Transcript_007730;Transcript_008863;Transcript_009319;Transcript_009455;Transcript_012966;Transcript_015977;Transcript_016138;Transcript_018217;Transcript_027836;Transcript_028622;Transcript_030740;Transcript_031485;Transcript_042466;Transcript_043056;Transcript_043738;Tra…
GO:0006520	P:cellular_amino_acid_metabolic_process	15	0.012926	Transcript_011172;Transcript_014472;Transcript_015457;Transcript_021848;Transcript_027651;Transcript_033495;Transcript_152632;Transcript_171389;Transcript_175390;Transcript_226879;Transcript_228235;Transcript_228907;Transcript_231530;Transcript_241903;Transcript_242408
GO:0004169	F:dolichyl-phosphate-mannose-protein_mannosyltransferase_activity	5	0.443438	Transcript_020946;Transcript_023970;Transcript_031084;Transcript_065733;Transcript_235176
GO:0047484	P:regulation_of_response_to_osmotic_stress	5	0.240732	Transcript_015080;Transcript_042145;Transcript_168646;Transcript_198915;Transcript_227688
GO:0000151	C:ubiquitin_ligase_complex	14	0.00370117	Transcript_000626;Transcript_007006;Transcript_008382;Transcript_010014;Transcript_013885;Transcript_032009;Transcript_037537;Transcript_156525;Transcript_192690;Transcript_225631;Transcript_226233;Transcript_231828;Transcript_240826;Transcript_241734
GO:0051726	P:regulation_of_cell_cycle	19	0.000347331	Transcript_022364;Transcript_023949;Transcript_033781;Transcript_050769;Transcript_080710;Transcript_102815;Transcript_132731;Transcript_140079;Transcript_157109;Transcript_163001;Transcript_175337;Transcript_188899;Transcript_199090;Transcript_215504;Transcript_225466;Transcript_226156;Transcript_236405;Transcript_237042;Transcript_238719
GO:0042793	P:transcription_from_plastid_promoter	7	0.42938	Transcript_076266;Transcript_084874;Transcript_137218;Transcript_187753;Transcript_236980;Transcript_241511;Transcript_241827
GO:0018444	C:translation_release_factor_complex	2	0.456579	Transcript_009359;Transcript_110725
GO:0010206	P:photosystem_II_repair	5	0.300018	Transcript_017733;Transcript_042121;Transcript_049934;Transcript_134617;Transcript_222934
GO:0047012	F:sterol-4-alpha-carboxylate_3-dehydrogenase_(decarboxylating)_activity	3	0.639444	Transcript_157271;Transcript_242409;Transcript_244569
GO:0009011	F:starch_synthase_activity	6	0.169485	Transcript_003800;Transcript_045308;Transcript_155399;Transcript_225630;Transcript_229673;Transcript_231757
GO:0035338	P:long-chain_fatty-acyl-CoA_biosynthetic_process	3	0.527991	Transcript_038714;Transcript_127755;Transcript_231679
GO:0035250	F:UDP-galactosyltransferase_activity	2	0.406345	Transcript_180845;Transcript_239329
GO:0044210	P:'de_novo'_CTP_biosynthetic_process	7	0.73338	Transcript_022938;Transcript_029605;Transcript_047326;Transcript_213733;Transcript_227205;Transcript_230725;Transcript_235526
GO:0008134	F:transcription_factor_binding	7	0.00028513	Transcript_026022;Transcript_038194;Transcript_043536;Transcript_081822;Transcript_156905;Transcript_204709;Transcript_238410
ko04370	VEGF_signaling_pathway	23	0.0245589	Transcript_010012;Transcript_012094;Transcript_021853;Transcript_024575;Transcript_033023;Transcript_043118;Transcript_058863;Transcript_059039;Transcript_072106;Transcript_092873;Transcript_150338;Transcript_150886;Transcript_162158;Transcript_175126;Transcript_207470;Transcript_223900;Transcript_224126;Transcript_230020;Transcript_230696;Transcript_231953;Transcript_236061;Transcript_239220;Tra…
GO:0016571	P:histone_methylation	6	0.00613511	Transcript_102940;Transcript_147437;Transcript_200038;Transcript_222854;Transcript_230754;Transcript_244041
GO:0043666	P:regulation_of_phosphoprotein_phosphatase_activity	3	0.506334	Transcript_107781;Transcript_139790;Transcript_185004
GO:0071944	C:cell_periphery_	7	0.151981	Transcript_002537;Transcript_044013;Transcript_197384;Transcript_222697;Transcript_226216;Transcript_234710;Transcript_240445
GO:0010152	P:pollen_maturation	9	0.0648237	Transcript_014548;Transcript_041661;Transcript_103207;Transcript_224529;Transcript_225740;Transcript_226818;Transcript_229675;Transcript_230686;Transcript_242666
GO:0042651	C:thylakoid_membrane	8	0.312713	Transcript_003002;Transcript_009353;Transcript_017733;Transcript_099475;Transcript_225703;Transcript_232847;Transcript_233206;Transcript_234622
GO:0006546	P:glycine_catabolic_process	9	0.332784	Transcript_020553;Transcript_021813;Transcript_093453;Transcript_130283;Transcript_166748;Transcript_214102;Transcript_225061;Transcript_226314;Transcript_230080
GO:0005750	C:mitochondrial_respiratory_chain_complex_III_	9	0.185222	Transcript_029344;Transcript_035849;Transcript_043609;Transcript_076030;Transcript_163662;Transcript_183007;Transcript_225438;Transcript_233724;Transcript_236953
GO:0046570	F:methylthioribulose_1-phosphate_dehydratase_activity	2	1	Transcript_010578;Transcript_044766
GO:0016032	P:viral_process	40	1.5323e-09	Transcript_004148;Transcript_008762;Transcript_009472;Transcript_022136;Transcript_027957;Transcript_028662;Transcript_030772;Transcript_033085;Transcript_043111;Transcript_043900;Transcript_044950;Transcript_046112;Transcript_046685;Transcript_052894;Transcript_091825;Transcript_097747;Transcript_103341;Transcript_117496;Transcript_139386;Transcript_155690;Transcript_168736;Transcript_179129;Tra…
GO:0019279	P:L-methionine_biosynthetic_process_from_L-homoserine_via_cystathionine	3	0.7609	Transcript_079697;Transcript_118468;Transcript_150519
GO:0070059	P:intrinsic_apoptotic_signaling_pathway_in_response_to_endoplasmic_reticulum_stress	2	1	Transcript_107188;Transcript_172586
ko03040	Spliceosome	127	4.15802e-11	Transcript_002011;Transcript_004300;Transcript_005400;Transcript_008762;Transcript_009327;Transcript_011217;Transcript_011350;Transcript_012093;Transcript_012757;Transcript_014001;Transcript_014467;Transcript_016098;Transcript_016158;Transcript_017085;Transcript_017203;Transcript_017661;Transcript_018065;Transcript_020233;Transcript_020579;Transcript_021722;Transcript_022279;Transcript_022998;Tra…
GO:0015086	F:cadmium_ion_transmembrane_transporter_activity	2	0.154885	Transcript_095005;Transcript_169458
GO:0033962	P:cytoplasmic_mRNA_processing_body_assembly	4	1	Transcript_032972;Transcript_046685;Transcript_222654;Transcript_237857
GO:0045595	P:regulation_of_cell_differentiation	3	0.237067	Transcript_031083;Transcript_186835;Transcript_234528
GO:0004829	F:threonine-tRNA_ligase_activity	3	0.303101	Transcript_032436;Transcript_168600;Transcript_232220
GO:0035556	P:intracellular_signal_transduction	59	1.83546e-06	Transcript_005951;Transcript_008670;Transcript_009339;Transcript_009893;Transcript_017235;Transcript_019690;Transcript_020078;Transcript_021589;Transcript_022223;Transcript_025365;Transcript_026965;Transcript_028717;Transcript_031856;Transcript_043131;Transcript_043306;Transcript_043346;Transcript_043933;Transcript_045110;Transcript_047563;Transcript_053833;Transcript_056836;Transcript_061214;Tra…
GO:0006470	P:protein_dephosphorylation	88	2.51142e-07	Transcript_001949;Transcript_004615;Transcript_005552;Transcript_007033;Transcript_007158;Transcript_011923;Transcript_013342;Transcript_016311;Transcript_016945;Transcript_017629;Transcript_018079;Transcript_018282;Transcript_019538;Transcript_019663;Transcript_022099;Transcript_022125;Transcript_024005;Transcript_024746;Transcript_025199;Transcript_025639;Transcript_027475;Transcript_027579;Tra…
GO:0043085	P:positive_regulation_of_catalytic_activity	12	0.0318903	Transcript_014604;Transcript_016719;Transcript_024879;Transcript_039086;Transcript_073903;Transcript_079869;Transcript_113522;Transcript_152432;Transcript_161886;Transcript_185594;Transcript_226089;Transcript_229017
GO:2000024	P:regulation_of_leaf_development	14	0.0175098	Transcript_018802;Transcript_023646;Transcript_023932;Transcript_027836;Transcript_041496;Transcript_042145;Transcript_042637;Transcript_085304;Transcript_105037;Transcript_155267;Transcript_177606;Transcript_213214;Transcript_226198;Transcript_232883
GO:0000386	F:second_spliceosomal_transesterification_activity	5	0.696697	Transcript_011217;Transcript_187896;Transcript_206492;Transcript_227922;Transcript_229688
GO:0042062	P:long-term_strengthening_of_neuromuscular_junction	2	0.281171	Transcript_026391;Transcript_151249
GO:0002039	F:p53_binding	6	0.0652015	Transcript_037537;Transcript_147437;Transcript_172586;Transcript_226090;Transcript_226233;Transcript_241734
GO:0019761	P:glucosinolate_biosynthetic_process	8	0.0880935	Transcript_010400;Transcript_026424;Transcript_053106;Transcript_183183;Transcript_201021;Transcript_230378;Transcript_230674;Transcript_237206
GO:0008363	P:larval_chitin-based_cuticle_development	2	1	Transcript_011795;Transcript_224482
GO:0004556	F:alpha-amylase_activity	2	0.343054	Transcript_004377;Transcript_018355
GO:0045495	C:pole_plasm	2	0.695033	Transcript_021722;Transcript_184391
GO:0071918	P:urea_transmembrane_transport	6	1	Transcript_009157;Transcript_020502;Transcript_167494;Transcript_187017;Transcript_188161;Transcript_239536
GO:0009234	P:menaquinone_biosynthetic_process	2	1	Transcript_188055;Transcript_225306
GO:0051800	F:phosphatidylinositol-3,4-bisphosphate_3-phosphatase_activity	3	0.527991	Transcript_004615;Transcript_035784;Transcript_112814
GO:0043995	F:histone_acetyltransferase_activity_(H4-K5_specific)	2	0.595334	Transcript_208666;Transcript_242565
GO:0004623	F:phospholipase_A2_activity	8	0.855416	Transcript_008926;Transcript_068663;Transcript_154217;Transcript_167693;Transcript_188728;Transcript_208944;Transcript_227282;Transcript_236714
GO:0010458	P:exit_from_mitosis	2	0.281171	Transcript_074050;Transcript_117708
GO:0004108	F:citrate_(Si)-synthase_activity	2	0.19603	Transcript_227264;Transcript_228821
GO:0016149	F:translation_release_factor_activity,_codon_specific	4	0.0963587	Transcript_009359;Transcript_047063;Transcript_110725;Transcript_151404
GO:0003006	P:developmental_process_involved_in_reproduction	4	0.27286	Transcript_045110;Transcript_205700;Transcript_226883;Transcript_236082
GO:0040016	P:embryonic_cleavage	2	1	Transcript_033085;Transcript_236631
ko04933	AGE-RAGE_signaling_pathway_in_diabetic_complications	19	0.0627496	Transcript_021853;Transcript_043118;Transcript_058863;Transcript_072106;Transcript_140517;Transcript_150338;Transcript_150886;Transcript_154268;Transcript_162158;Transcript_174975;Transcript_207470;Transcript_223900;Transcript_224126;Transcript_230020;Transcript_230696;Transcript_231953;Transcript_236061;Transcript_236155;Transcript_239220
GO:0016884	F:carbon-nitrogen_ligase_activity,_with_glutamine_as_amido-N-donor	7	0.235393	Transcript_008582;Transcript_017243;Transcript_095555;Transcript_110067;Transcript_156165;Transcript_168843;Transcript_235022
GO:0046961	F:proton-transporting_ATPase_activity,_rotational_mechanism	17	1.44247e-06	Transcript_002006;Transcript_011762;Transcript_017330;Transcript_021517;Transcript_072125;Transcript_084692;Transcript_085172;Transcript_150661;Transcript_182662;Transcript_201103;Transcript_205374;Transcript_225946;Transcript_226819;Transcript_230173;Transcript_231016;Transcript_232683;Transcript_241197
GO:0007413	P:axonal_fasciculation	2	0.776635	Transcript_150276;Transcript_196140
GO:0005758	C:mitochondrial_intermembrane_space	29	0.0230816	Transcript_002827;Transcript_009517;Transcript_009683;Transcript_014498;Transcript_025583;Transcript_025633;Transcript_028716;Transcript_029344;Transcript_030430;Transcript_035849;Transcript_038520;Transcript_039319;Transcript_042431;Transcript_094028;Transcript_120658;Transcript_141001;Transcript_158398;Transcript_162459;Transcript_163662;Transcript_172449;Transcript_175303;Transcript_197118;Tra…
GO:0042285	F:xylosyltransferase_activity	3	0.0237529	Transcript_027303;Transcript_059453;Transcript_244838
GO:0006535	P:cysteine_biosynthetic_process_from_serine	7	0.0480795	Transcript_017374;Transcript_029193;Transcript_041858;Transcript_125614;Transcript_199275;Transcript_235866;Transcript_243351
GO:0097056	P:selenocysteinyl-tRNA(Sec)_biosynthetic_process	2	0.14426	Transcript_020339;Transcript_190886
GO:0004307	F:ethanolaminephosphotransferase_activity	2	0.256238	Transcript_028280;Transcript_134896
GO:0043068	P:positive_regulation_of_programmed_cell_death	4	0.544577	Transcript_037886;Transcript_173644;Transcript_206233;Transcript_238147
GO:1903232	P:melanosome_assembly	2	0.154885	Transcript_017876;Transcript_173643
GO:0042617	P:paclitaxel_biosynthetic_process	2	0.406345	Transcript_005730;Transcript_151814
GO:0017148	P:negative_regulation_of_translation	7	0.0136488	Transcript_013502;Transcript_014861;Transcript_180291;Transcript_230393;Transcript_231215;Transcript_232658;Transcript_240874
GO:0000445	C:THO_complex_part_of_transcription_export_complex	2	0.406345	Transcript_154695;Transcript_237580
GO:0032981	P:mitochondrial_respiratory_chain_complex_I_assembly	5	0.571511	Transcript_038520;Transcript_054350;Transcript_170217;Transcript_225105;Transcript_228909
GO:0007293	P:germarium-derived_egg_chamber_formation	7	0.844175	Transcript_015910;Transcript_026391;Transcript_180291;Transcript_193305;Transcript_229953;Transcript_232658;Transcript_240915
GO:0016114	P:terpenoid_biosynthetic_process	24	0.0530498	Transcript_007266;Transcript_014401;Transcript_021247;Transcript_025151;Transcript_030685;Transcript_031929;Transcript_041330;Transcript_044261;Transcript_069394;Transcript_070423;Transcript_130655;Transcript_153355;Transcript_157807;Transcript_176804;Transcript_194458;Transcript_195995;Transcript_223679;Transcript_224089;Transcript_226851;Transcript_231115;Transcript_233955;Transcript_235992;Tra…
GO:0006983	P:ER_overload_response	2	0.602246	Transcript_172586;Transcript_239480
GO:0022625	C:cytosolic_large_ribosomal_subunit	74	2.04795e-05	Transcript_002555;Transcript_004360;Transcript_007059;Transcript_007166;Transcript_007868;Transcript_008453;Transcript_013258;Transcript_014993;Transcript_015616;Transcript_016190;Transcript_017396;Transcript_017714;Transcript_019513;Transcript_020926;Transcript_026937;Transcript_028181;Transcript_033859;Transcript_034522;Transcript_036833;Transcript_038464;Transcript_042540;Transcript_044084;Tra…
GO:0032133	C:chromosome_passenger_complex	2	0.456579	Transcript_028330;Transcript_137349
GO:0048555	C:generative_cell_nucleus_	2	1	Transcript_231824;Transcript_242736
GO:1901937	P:beta-caryophyllene_biosynthetic_process	2	1	Transcript_044261;Transcript_070423
GO:0043982	P:histone_H4-K8_acetylation	2	0.595334	Transcript_161886;Transcript_208666
GO:0000156	F:phosphorelay_response_regulator_activity	8	0.00778887	Transcript_017560;Transcript_020405;Transcript_032858;Transcript_117469;Transcript_158984;Transcript_164557;Transcript_196770;Transcript_238765
GO:0035281	P:pre-miRNA_export_from_nucleus	2	0.406345	Transcript_092175;Transcript_211107
ko05162	Measles	17	0.00588572	Transcript_004137;Transcript_007680;Transcript_013798;Transcript_022279;Transcript_037537;Transcript_069212;Transcript_170584;Transcript_172586;Transcript_189001;Transcript_193507;Transcript_199469;Transcript_226233;Transcript_226346;Transcript_228749;Transcript_234875;Transcript_238686;Transcript_241734
ko05231	Choline_metabolism_in_cancer	45	2.56711e-05	Transcript_015409;Transcript_015593;Transcript_021853;Transcript_024575;Transcript_027651;Transcript_029041;Transcript_033023;Transcript_042004;Transcript_043118;Transcript_043217;Transcript_043695;Transcript_058863;Transcript_072106;Transcript_075635;Transcript_089375;Transcript_098400;Transcript_106890;Transcript_114057;Transcript_114743;Transcript_149141;Transcript_150338;Transcript_150886;Tra…
GO:0061024	P:membrane_organization	5	0.375434	Transcript_011795;Transcript_044030;Transcript_137297;Transcript_183122;Transcript_241752
GO:0016667	F:oxidoreductase_activity,_acting_on_a_sulfur_group_of_donors	3	0.527991	Transcript_225622;Transcript_226324;Transcript_228748
GO:0000453	P:enzyme-directed_rRNA_2'-O-methylation	2	1	Transcript_029996;Transcript_244072
GO:0002092	P:positive_regulation_of_receptor_internalization	2	0.343054	Transcript_045070;Transcript_154171
GO:1901998	P:toxin_transport	7	0.357197	Transcript_012922;Transcript_024203;Transcript_141920;Transcript_152844;Transcript_171268;Transcript_222632;Transcript_235922
GO:0034719	C:SMN-Sm_protein_complex	4	0.544577	Transcript_002011;Transcript_042810;Transcript_094552;Transcript_228355
GO:0048190	P:wing_disc_dorsal/ventral_pattern_formation	3	1	Transcript_040005;Transcript_186849;Transcript_199789
ko04210	Apoptosis	25	0.00251452	Transcript_007729;Transcript_009220;Transcript_013501;Transcript_013833;Transcript_015593;Transcript_016295;Transcript_020615;Transcript_023059;Transcript_024575;Transcript_030063;Transcript_033023;Transcript_034582;Transcript_055238;Transcript_072106;Transcript_085990;Transcript_098359;Transcript_161484;Transcript_201430;Transcript_203899;Transcript_210999;Transcript_223900;Transcript_230696;Tra…
GO:0018026	P:peptidyl-lysine_monomethylation	2	1	Transcript_009114;Transcript_147437
GO:0046488	P:phosphatidylinositol_metabolic_process	3	0.0765394	Transcript_027976;Transcript_093969;Transcript_239699
GO:0004816	F:asparagine-tRNA_ligase_activity	2	0.105779	Transcript_095516;Transcript_160539
GO:0016811	F:hydrolase_activity,_acting_on_carbon-nitrogen_(but_not_peptide)_bonds,_in_linear_amides_	3	0.805419	Transcript_008690;Transcript_009615;Transcript_175040
GO:0005643	C:nuclear_pore	18	1.45929e-06	Transcript_007391;Transcript_007619;Transcript_022674;Transcript_025106;Transcript_030364;Transcript_054999;Transcript_060640;Transcript_096602;Transcript_110588;Transcript_132894;Transcript_158395;Transcript_199146;Transcript_224840;Transcript_226646;Transcript_227860;Transcript_238406;Transcript_240777;Transcript_241241
ko04974	Protein_digestion_and_absorption	5	0.09118	Transcript_018705;Transcript_198586;Transcript_222179;Transcript_240329;Transcript_240974
GO:0035097	C:histone_methyltransferase_complex_	3	0.303101	Transcript_183851;Transcript_199156;Transcript_240253
GO:0043565	F:sequence-specific_DNA_binding	132	4.96162e-19	Transcript_004195;Transcript_004543;Transcript_004860;Transcript_006181;Transcript_006812;Transcript_007218;Transcript_007641;Transcript_008148;Transcript_009760;Transcript_011939;Transcript_013523;Transcript_015884;Transcript_016601;Transcript_016764;Transcript_018370;Transcript_018709;Transcript_019147;Transcript_019684;Transcript_021463;Transcript_022990;Transcript_023128;Transcript_023279;Tra…
GO:0004075	F:biotin_carboxylase_activity	2	0.256238	Transcript_080413;Transcript_225199
GO:0019220	P:regulation_of_phosphate_metabolic_process	2	0.0161315	Transcript_222068;Transcript_241332
GO:0006879	P:cellular_iron_ion_homeostasis	16	0.0332037	Transcript_016059;Transcript_028064;Transcript_030702;Transcript_034761;Transcript_044119;Transcript_100725;Transcript_109879;Transcript_139088;Transcript_153323;Transcript_161838;Transcript_196107;Transcript_199763;Transcript_219273;Transcript_222995;Transcript_226341;Transcript_235041
GO:0006376	P:mRNA_splice_site_selection	7	0.73338	Transcript_015953;Transcript_051286;Transcript_052165;Transcript_140909;Transcript_195544;Transcript_210034;Transcript_219142
GO:0071786	P:endoplasmic_reticulum_tubular_network_organization	3	0.0129099	Transcript_033420;Transcript_223565;Transcript_243845
GO:0003964	F:RNA-directed_DNA_polymerase_activity	31	3.52181e-10	Transcript_008366;Transcript_009058;Transcript_016600;Transcript_019168;Transcript_024256;Transcript_024865;Transcript_028366;Transcript_029074;Transcript_030478;Transcript_049116;Transcript_060977;Transcript_069286;Transcript_080023;Transcript_099886;Transcript_130853;Transcript_144762;Transcript_150625;Transcript_174927;Transcript_197515;Transcript_205135;Transcript_224573;Transcript_226266;Tra…
GO:0000495	P:box_H/ACA_snoRNA_3'-end_processing	3	0.393222	Transcript_103493;Transcript_232706;Transcript_234243
GO:0007015	P:actin_filament_organization	18	0.302387	Transcript_011795;Transcript_021853;Transcript_024980;Transcript_026710;Transcript_056109;Transcript_084020;Transcript_106105;Transcript_116920;Transcript_150886;Transcript_152417;Transcript_152731;Transcript_153842;Transcript_170020;Transcript_207470;Transcript_214298;Transcript_224126;Transcript_232904;Transcript_233424
GO:0008728	F:GTP_diphosphokinase_activity	8	0.265002	Transcript_041732;Transcript_042217;Transcript_149380;Transcript_180886;Transcript_192556;Transcript_211039;Transcript_228648;Transcript_232170
GO:0000777	C:condensed_chromosome_kinetochore_	5	0.00251095	Transcript_036301;Transcript_060502;Transcript_155446;Transcript_164095;Transcript_228738
GO:0005776	C:autophagosome_	6	0.494742	Transcript_009564;Transcript_043173;Transcript_112191;Transcript_161919;Transcript_164757;Transcript_229224
GO:0006778	P:porphyrin-containing_compound_metabolic_process	2	0.281171	Transcript_034137;Transcript_090645
GO:0006936	P:muscle_contraction	2	0.595334	Transcript_181944;Transcript_217583
GO:0050589	F:leucocyanidin_oxygenase_activity	2	0.281171	Transcript_008730;Transcript_238716
GO:0006662	P:glycerol_ether_metabolic_process	26	0.0432087	Transcript_002210;Transcript_008652;Transcript_014604;Transcript_019891;Transcript_020481;Transcript_021943;Transcript_025620;Transcript_033053;Transcript_039086;Transcript_042724;Transcript_077043;Transcript_103151;Transcript_138711;Transcript_156926;Transcript_163704;Transcript_184360;Transcript_201021;Transcript_208309;Transcript_223304;Transcript_223993;Transcript_227389;Transcript_227621;Tra…
GO:0005811	C:lipid_particle	44	0.0138345	Transcript_002006;Transcript_002537;Transcript_002621;Transcript_009163;Transcript_009220;Transcript_009645;Transcript_015725;Transcript_020473;Transcript_023930;Transcript_026391;Transcript_029499;Transcript_030182;Transcript_031671;Transcript_034088;Transcript_041161;Transcript_042963;Transcript_044805;Transcript_049612;Transcript_059959;Transcript_067433;Transcript_072674;Transcript_098359;Tra…
GO:0010112	P:regulation_of_systemic_acquired_resistance	5	0.840345	Transcript_014269;Transcript_014728;Transcript_022180;Transcript_224884;Transcript_244416
GO:0030512	P:negative_regulation_of_transforming_growth_factor_beta_receptor_signaling_pathway	2	0.19603	Transcript_094552;Transcript_239863
GO:0042632	P:cholesterol_homeostasis	16	0.408727	Transcript_003866;Transcript_012922;Transcript_019653;Transcript_084987;Transcript_098425;Transcript_100904;Transcript_120546;Transcript_137357;Transcript_155569;Transcript_155875;Transcript_231033;Transcript_231455;Transcript_232616;Transcript_233435;Transcript_239058;Transcript_240271
GO:0032482	P:Rab_protein_signal_transduction	31	2.46631e-06	Transcript_008147;Transcript_008169;Transcript_017876;Transcript_018541;Transcript_021496;Transcript_028647;Transcript_050369;Transcript_056352;Transcript_059305;Transcript_093222;Transcript_100520;Transcript_107757;Transcript_135745;Transcript_146911;Transcript_165340;Transcript_168687;Transcript_173643;Transcript_174319;Transcript_188886;Transcript_190628;Transcript_192519;Transcript_199638;Tra…
GO:0060009	P:Sertoli_cell_development	2	0.281171	Transcript_186294;Transcript_206123
GO:0000703	F:oxidized_pyrimidine_nucleobase_lesion_DNA_N-glycosylase_activity	2	0.281171	Transcript_095546;Transcript_143674
ko04310	Wnt_signaling_pathway	45	3.38399e-06	Transcript_004137;Transcript_005874;Transcript_007680;Transcript_010012;Transcript_012094;Transcript_013798;Transcript_015523;Transcript_017223;Transcript_021853;Transcript_022136;Transcript_025844;Transcript_026338;Transcript_029089;Transcript_030322;Transcript_034734;Transcript_038194;Transcript_043118;Transcript_044543;Transcript_049471;Transcript_058863;Transcript_059039;Transcript_092873;Tra…
GO:0015012	P:heparan_sulfate_proteoglycan_biosynthetic_process	8	0.747417	Transcript_030722;Transcript_032994;Transcript_034014;Transcript_128697;Transcript_180845;Transcript_227762;Transcript_228074;Transcript_237268
GO:0043545	P:molybdopterin_cofactor_metabolic_process	2	0.154885	Transcript_208129;Transcript_240021
GO:0009635	P:response_to_herbicide	2	0.0565074	Transcript_018501;Transcript_233511
GO:0090263	P:positive_regulation_of_canonical_Wnt_signaling_pathway	2	0.0412318	Transcript_172586;Transcript_225125
GO:0016055	P:Wnt_signaling_pathway	12	1.42633e-07	Transcript_006433;Transcript_011706;Transcript_038194;Transcript_043323;Transcript_059959;Transcript_081735;Transcript_150902;Transcript_223881;Transcript_233768;Transcript_234875;Transcript_235721;Transcript_244253
GO:0008534	F:oxidized_purine_nucleobase_lesion_DNA_N-glycosylase_activity	3	1	Transcript_117629;Transcript_197824;Transcript_231438
GO:0071806	P:protein_transmembrane_transport	8	0.309922	Transcript_005893;Transcript_014498;Transcript_029507;Transcript_044153;Transcript_099524;Transcript_120658;Transcript_150319;Transcript_181292
GO:0009099	P:valine_biosynthetic_process	5	0.0105071	Transcript_016816;Transcript_040344;Transcript_074888;Transcript_183003;Transcript_233300
GO:0006754	P:ATP_biosynthetic_process	14	0.072986	Transcript_002196;Transcript_005827;Transcript_009645;Transcript_017330;Transcript_042963;Transcript_058902;Transcript_075297;Transcript_166193;Transcript_175055;Transcript_180084;Transcript_222966;Transcript_228116;Transcript_233252;Transcript_235417
GO:0010046	P:response_to_mycotoxin	2	1	Transcript_067318;Transcript_160054
GO:0030488	P:tRNA_methylation	2	0.00432779	Transcript_091210;Transcript_234142
GO:0030479	C:actin_cortical_patch_	2	0.695033	Transcript_084020;Transcript_214298
GO:0030619	F:U1_snRNA_binding	8	0.868251	Transcript_011217;Transcript_043873;Transcript_052231;Transcript_187896;Transcript_206492;Transcript_206989;Transcript_227922;Transcript_229688
GO:0008782	F:adenosylhomocysteine_nucleosidase_activity	4	0.367155	Transcript_008347;Transcript_152924;Transcript_174791;Transcript_238306
GO:1990477	C:NURS_complex	2	0.154885	Transcript_030389;Transcript_230188
GO:0042493	P:response_to_drug	12	0.0131348	Transcript_002537;Transcript_016578;Transcript_021257;Transcript_033085;Transcript_034880;Transcript_087523;Transcript_152351;Transcript_207354;Transcript_217083;Transcript_221820;Transcript_229824;Transcript_239058
GO:0047202	F:sinapoylglucose-choline_O-sinapoyltransferase_activity	3	0.527991	Transcript_120825;Transcript_206959;Transcript_223016
GO:0045143	P:homologous_chromosome_segregation	2	0.190669	Transcript_006433;Transcript_240714
GO:0009734	P:auxin-activated_signaling_pathway	109	1.02495e-13	Transcript_000919;Transcript_001411;Transcript_001464;Transcript_003554;Transcript_006567;Transcript_008506;Transcript_013227;Transcript_013776;Transcript_014548;Transcript_015508;Transcript_016556;Transcript_018501;Transcript_018802;Transcript_019690;Transcript_021589;Transcript_022136;Transcript_024500;Transcript_024829;Transcript_025365;Transcript_027624;Transcript_030667;Transcript_031201;Tra…
ko03070	Bacterial_secretion_system	8	0.255969	Transcript_005893;Transcript_025324;Transcript_047240;Transcript_076266;Transcript_223853;Transcript_225025;Transcript_228071;Transcript_234622
GO:0022841	F:potassium_ion_leak_channel_activity	3	0.506334	Transcript_025134;Transcript_088218;Transcript_172598
GO:0071004	C:U2-type_prespliceosome	7	0.122759	Transcript_009745;Transcript_012093;Transcript_022998;Transcript_052231;Transcript_137677;Transcript_147408;Transcript_206989
ko00600	Sphingolipid_metabolism	16	3.23741e-05	Transcript_005053;Transcript_007704;Transcript_009169;Transcript_018314;Transcript_022215;Transcript_041369;Transcript_147796;Transcript_158638;Transcript_175040;Transcript_175126;Transcript_192860;Transcript_210187;Transcript_222067;Transcript_231949;Transcript_241400;Transcript_243904
GO:0000413	P:protein_peptidyl-prolyl_isomerization	19	0.00013582	Transcript_006513;Transcript_007353;Transcript_008720;Transcript_016710;Transcript_019066;Transcript_020338;Transcript_020722;Transcript_033093;Transcript_051541;Transcript_137483;Transcript_174013;Transcript_174430;Transcript_176203;Transcript_196830;Transcript_226663;Transcript_231676;Transcript_232898;Transcript_240003;Transcript_243223
GO:0051538	F:3_iron,_4_sulfur_cluster_binding	10	0.0912588	Transcript_028047;Transcript_042987;Transcript_060657;Transcript_143268;Transcript_143477;Transcript_153355;Transcript_168585;Transcript_193240;Transcript_194521;Transcript_240144
GO:0000324	C:fungal-type_vacuole_	2	0.077373	Transcript_103108;Transcript_199342
GO:0006383	P:transcription_from_RNA_polymerase_III_promoter	8	0.00612702	Transcript_011857;Transcript_024610;Transcript_045641;Transcript_150478;Transcript_198777;Transcript_204285;Transcript_240746;Transcript_241223
GO:1900424	P:regulation_of_defense_response_to_bacterium	2	0.281171	Transcript_080417;Transcript_145272
GO:0048229	P:gametophyte_development	9	0.152637	Transcript_006160;Transcript_010400;Transcript_011213;Transcript_015265;Transcript_024441;Transcript_025560;Transcript_062938;Transcript_198468;Transcript_230674
GO:0043241	P:protein_complex_disassembly	2	1	Transcript_158005;Transcript_222588
GO:0031396	P:regulation_of_protein_ubiquitination	4	0.671724	Transcript_043411;Transcript_089035;Transcript_226337;Transcript_235212
GO:0046556	F:alpha-L-arabinofuranosidase_activity	5	0.0701666	Transcript_019000;Transcript_029356;Transcript_096281;Transcript_106104;Transcript_116363
GO:2001141	P:regulation_of_RNA_biosynthetic_process	5	0.810889	Transcript_011725;Transcript_017199;Transcript_043974;Transcript_208023;Transcript_230001
GO:0045551	F:cinnamyl-alcohol_dehydrogenase_activity_	2	0.190669	Transcript_079173;Transcript_137673
GO:0004149	F:dihydrolipoyllysine-residue_succinyltransferase_activity	3	0.135649	Transcript_085286;Transcript_185618;Transcript_223367
GO:0045010	P:actin_nucleation	3	0.0134479	Transcript_187718;Transcript_226216;Transcript_244041
GO:0004596	F:peptide_alpha-N-acetyltransferase_activity	10	0.609091	Transcript_004148;Transcript_011202;Transcript_044323;Transcript_049200;Transcript_049824;Transcript_050549;Transcript_103186;Transcript_188455;Transcript_236593;Transcript_237265
GO:0002221	P:pattern_recognition_receptor_signaling_pathway	6	0.266972	Transcript_087235;Transcript_106321;Transcript_179800;Transcript_197004;Transcript_200079;Transcript_240421
ko00540	Lipopolysaccharide_biosynthesis	2	0.0083522	Transcript_084524;Transcript_168857
ko05142	Chagas_disease_(American_trypanosomiasis)	13	0.0121584	Transcript_018889;Transcript_029746;Transcript_072106;Transcript_133924;Transcript_149814;Transcript_177346;Transcript_184912;Transcript_199469;Transcript_215286;Transcript_222223;Transcript_223900;Transcript_227790;Transcript_230696
GO:0008156	P:negative_regulation_of_DNA_replication	2	1	Transcript_031363;Transcript_059046
GO:0032868	P:response_to_insulin	3	1	Transcript_141192;Transcript_161886;Transcript_221820
GO:0004527	F:exonuclease_activity	15	0.227955	Transcript_000135;Transcript_002654;Transcript_017180;Transcript_017363;Transcript_031480;Transcript_032315;Transcript_036751;Transcript_044536;Transcript_081838;Transcript_124586;Transcript_149082;Transcript_152197;Transcript_161319;Transcript_177012;Transcript_207613
GO:1900994	P:(-)-secologanin_biosynthetic_process	5	0.0109412	Transcript_014425;Transcript_025553;Transcript_192382;Transcript_231489;Transcript_236642
GO:0000149	F:SNARE_binding	23	0.000351451	Transcript_009045;Transcript_009459;Transcript_013464;Transcript_031584;Transcript_033374;Transcript_033802;Transcript_037553;Transcript_037921;Transcript_039015;Transcript_044493;Transcript_048938;Transcript_116279;Transcript_141668;Transcript_161644;Transcript_187713;Transcript_191930;Transcript_193394;Transcript_199576;Transcript_227642;Transcript_233166;Transcript_236078;Transcript_238501;Tra…
GO:0019284	P:L-methionine_biosynthetic_process_from_S-adenosylmethionine	7	1	Transcript_010578;Transcript_016719;Transcript_044766;Transcript_079869;Transcript_108262;Transcript_174791;Transcript_225415
GO:0045739	P:positive_regulation_of_DNA_repair	5	0.375434	Transcript_026456;Transcript_060015;Transcript_142487;Transcript_185446;Transcript_240189
GO:0051740	F:ethylene_binding	5	0.409328	Transcript_020405;Transcript_032858;Transcript_158984;Transcript_164557;Transcript_196770
GO:0010260	P:organ_senescence	9	0.226243	Transcript_036022;Transcript_045110;Transcript_154238;Transcript_165068;Transcript_205700;Transcript_232161;Transcript_236082;Transcript_243444;Transcript_243544
GO:0008622	C:epsilon_DNA_polymerase_complex_	3	0.639444	Transcript_187860;Transcript_223843;Transcript_228204
GO:0034393	P:positive_regulation_of_smooth_muscle_cell_apoptotic_process	2	0.595334	Transcript_100239;Transcript_235573
GO:0031540	P:regulation_of_anthocyanin_biosynthetic_process	3	0.393222	Transcript_043839;Transcript_201417;Transcript_225342
GO:0010182	P:sugar_mediated_signaling_pathway	30	0.195634	Transcript_000262;Transcript_001411;Transcript_010014;Transcript_013227;Transcript_017085;Transcript_024829;Transcript_028698;Transcript_031596;Transcript_044973;Transcript_045110;Transcript_053544;Transcript_071303;Transcript_095600;Transcript_112208;Transcript_132647;Transcript_156525;Transcript_158984;Transcript_175196;Transcript_184641;Transcript_186835;Transcript_205700;Transcript_222544;Tra…
GO:0019373	P:epoxygenase_P450_pathway	7	0.850424	Transcript_003866;Transcript_098425;Transcript_120546;Transcript_155875;Transcript_231033;Transcript_231455;Transcript_233435
GO:0002020	F:protease_binding	4	1	Transcript_069040;Transcript_185303;Transcript_186430;Transcript_231515
GO:0008219	P:cell_death	19	0.357692	Transcript_009169;Transcript_020233;Transcript_021943;Transcript_024829;Transcript_025957;Transcript_035793;Transcript_044627;Transcript_052661;Transcript_080417;Transcript_085215;Transcript_145272;Transcript_147868;Transcript_184641;Transcript_199534;Transcript_202685;Transcript_226819;Transcript_228869;Transcript_239419;Transcript_239736
GO:0004367	F:glycerol-3-phosphate_dehydrogenase_NAD+_activity	2	0.602246	Transcript_104660;Transcript_238146
GO:0000418	C:DNA-directed_RNA_polymerase_IV_complex	8	0.0279961	Transcript_024610;Transcript_029815;Transcript_120290;Transcript_153412;Transcript_177018;Transcript_191298;Transcript_241791;Transcript_243535
GO:0015179	F:L-amino_acid_transmembrane_transporter_activity	3	0.232394	Transcript_015355;Transcript_042885;Transcript_226922
ko00521	Streptomycin_biosynthesis	6	0.404187	Transcript_002622;Transcript_012876;Transcript_014026;Transcript_232646;Transcript_243959;Transcript_244394
GO:0009921	C:auxin_efflux_carrier_complex_	2	0.281171	Transcript_056403;Transcript_176598
GO:0009926	P:auxin_polar_transport	23	0.0141465	Transcript_001411;Transcript_013227;Transcript_015508;Transcript_016556;Transcript_025532;Transcript_045970;Transcript_062668;Transcript_080441;Transcript_086222;Transcript_130684;Transcript_132647;Transcript_141463;Transcript_155722;Transcript_160420;Transcript_175813;Transcript_184088;Transcript_186151;Transcript_186370;Transcript_205465;Transcript_225221;Transcript_229566;Transcript_234332;Tra…
GO:0019216	P:regulation_of_lipid_metabolic_process	4	0.268461	Transcript_130283;Transcript_176325;Transcript_225061;Transcript_230080
GO:0032528	P:microvillus_organization	2	0.695033	Transcript_043277;Transcript_233721
GO:0043754	F:dihydrolipoyllysine-residue_(2-methylpropanoyl)transferase_activity	2	0.281171	Transcript_178465;Transcript_219275
GO:0048790	P:maintenance_of_presynaptic_active_zone_structure	2	0.281171	Transcript_026391;Transcript_151249
ko03440	Homologous_recombination	16	0.000306707	Transcript_000135;Transcript_009536;Transcript_012092;Transcript_029480;Transcript_031618;Transcript_042489;Transcript_087023;Transcript_087535;Transcript_096279;Transcript_188242;Transcript_221925;Transcript_222212;Transcript_231447;Transcript_235980;Transcript_244616;Transcript_244636
GO:0004520	F:endodeoxyribonuclease_activity	3	0.805419	Transcript_004862;Transcript_109391;Transcript_166381
GO:0000276	C:mitochondrial_proton-transporting_ATP_synthase_complex,_coupling_factor_F(o)	4	0.342182	Transcript_080504;Transcript_197105;Transcript_228003;Transcript_237336
GO:0004089	F:carbonate_dehydratase_activity	11	0.503926	Transcript_004822;Transcript_019741;Transcript_042632;Transcript_073459;Transcript_131026;Transcript_166863;Transcript_168970;Transcript_223930;Transcript_226286;Transcript_239833;Transcript_244104
GO:1990534	F:thermospermine_oxidase_activity	2	0.776635	Transcript_168708;Transcript_172823
GO:0090410	P:malonate_catabolic_process	2	1	Transcript_043867;Transcript_155415
GO:0048803	P:imaginal_disc-derived_male_genitalia_morphogenesis	2	0.695033	Transcript_043277;Transcript_233721
GO:0030431	P:sleep	2	0.456579	Transcript_149814;Transcript_241854
ko00660	C5-Branched_dibasic_acid_metabolism	5	1	Transcript_006928;Transcript_074888;Transcript_169815;Transcript_225154;Transcript_230378
GO:0045261	C:proton-transporting_ATP_synthase_complex,_catalytic_core_F(1)	8	0.000554091	Transcript_002006;Transcript_017330;Transcript_034232;Transcript_084692;Transcript_092111;Transcript_182662;Transcript_207464;Transcript_232683
GO:0046713	P:borate_transport	4	1	Transcript_156652;Transcript_188161;Transcript_224754;Transcript_239532
GO:0005547	F:phosphatidylinositol-3,4,5-trisphosphate_binding	2	1	Transcript_161886;Transcript_237868
GO:0008113	F:peptide-methionine_(S)-S-oxide_reductase_activity	4	0.671724	Transcript_005422;Transcript_013325;Transcript_101128;Transcript_190389
GO:0009966	P:regulation_of_signal_transduction	2	0.343054	Transcript_007585;Transcript_227887
GO:0009808	P:lignin_metabolic_process	3	0.25427	Transcript_030283;Transcript_198152;Transcript_239148
GO:0003747	F:translation_release_factor_activity	3	0.0765394	Transcript_006068;Transcript_009359;Transcript_110725
GO:0071365	P:cellular_response_to_auxin_stimulus	4	0.0963587	Transcript_016556;Transcript_141463;Transcript_160054;Transcript_168089
ko04911	Insulin_secretion	2	0.776635	Transcript_023676;Transcript_043570
GO:0009641	P:shade_avoidance	9	0.555674	Transcript_023102;Transcript_054583;Transcript_131178;Transcript_157364;Transcript_162731;Transcript_202542;Transcript_225280;Transcript_233811;Transcript_239284
GO:0016891	F:endoribonuclease_activity,_producing_5'-phosphomonoesters_	2	0.602246	Transcript_062313;Transcript_170474
GO:0070481	P:nuclear-transcribed_mRNA_catabolic_process,_non-stop_decay	2	1	Transcript_142642;Transcript_227110
GO:0004300	F:enoyl-CoA_hydratase_activity	2	0.006011	Transcript_106329;Transcript_175002
GO:0007095	P:mitotic_G2_DNA_damage_checkpoint	4	0.676899	Transcript_186849;Transcript_188899;Transcript_213037;Transcript_221999
GO:0003989	F:acetyl-CoA_carboxylase_activity	6	0.0180276	Transcript_153543;Transcript_156528;Transcript_157145;Transcript_206598;Transcript_225199;Transcript_230034
GO:0006226	P:dUMP_biosynthetic_process	2	0.776635	Transcript_054059;Transcript_231434
GO:0009298	P:GDP-mannose_biosynthetic_process	2	1.04664e-05	Transcript_139838;Transcript_195203
GO:0042752	P:regulation_of_circadian_rhythm	11	0.0429592	Transcript_063225;Transcript_119807;Transcript_149776;Transcript_174247;Transcript_226843;Transcript_229342;Transcript_230340;Transcript_232785;Transcript_234354;Transcript_236631;Transcript_244514
GO:0008408	F:3'-5'_exonuclease_activity	8	0.00093096	Transcript_004862;Transcript_027806;Transcript_169937;Transcript_190556;Transcript_223843;Transcript_228204;Transcript_237727;Transcript_239610
GO:0032201	P:telomere_maintenance_via_semi-conservative_replication	2	1	Transcript_142487;Transcript_238433
GO:0010216	P:maintenance_of_DNA_methylation	5	0.0184647	Transcript_000262;Transcript_018951;Transcript_221792;Transcript_222854;Transcript_243218
GO:0000220	C:vacuolar_proton-transporting_V-type_ATPase,_V0_domain	2	0.0083522	Transcript_230173;Transcript_231016
GO:0047924	F:geraniol_dehydrogenase_activity_	10	0.737463	Transcript_029764;Transcript_045168;Transcript_066923;Transcript_067611;Transcript_084379;Transcript_110668;Transcript_176340;Transcript_185135;Transcript_222713;Transcript_233420
GO:0006071	P:glycerol_metabolic_process	16	0.103647	Transcript_004742;Transcript_018183;Transcript_027546;Transcript_030182;Transcript_030475;Transcript_039564;Transcript_044805;Transcript_092343;Transcript_145120;Transcript_149716;Transcript_163791;Transcript_221862;Transcript_227040;Transcript_241951;Transcript_241989;Transcript_243834
GO:0080019	F:fatty-acyl-CoA_reductase_(alcohol-forming)_activity	8	0.747417	Transcript_039926;Transcript_092265;Transcript_164643;Transcript_175075;Transcript_195353;Transcript_231182;Transcript_232700;Transcript_241795
GO:0004568	F:chitinase_activity	7	0.0104471	Transcript_032979;Transcript_077638;Transcript_096837;Transcript_149601;Transcript_155035;Transcript_180664;Transcript_224207
GO:0001053	F:plastid_sigma_factor_activity	5	0.820517	Transcript_011725;Transcript_017199;Transcript_043974;Transcript_208023;Transcript_230001
GO:0010540	P:basipetal_auxin_transport	16	0.0181429	Transcript_032581;Transcript_036881;Transcript_043933;Transcript_059532;Transcript_130684;Transcript_148175;Transcript_150662;Transcript_151834;Transcript_155722;Transcript_165997;Transcript_186151;Transcript_222312;Transcript_234332;Transcript_235363;Transcript_237078;Transcript_244056
GO:0006729	P:tetrahydrobiopterin_biosynthetic_process	4	0.0963587	Transcript_015457;Transcript_136582;Transcript_160391;Transcript_242342
GO:0098710	P:guanine_import_across_plasma_membrane	3	0.7609	Transcript_015491;Transcript_023143;Transcript_029355
GO:1902600	P:hydrogen_ion_transmembrane_transport	24	0.0741345	Transcript_000586;Transcript_002649;Transcript_013503;Transcript_017321;Transcript_042995;Transcript_049612;Transcript_060031;Transcript_062728;Transcript_165857;Transcript_168034;Transcript_173190;Transcript_173478;Transcript_174219;Transcript_175523;Transcript_203255;Transcript_204015;Transcript_211637;Transcript_225116;Transcript_229365;Transcript_230671;Transcript_232296;Transcript_235568;Tra…
GO:0004140	F:dephospho-CoA_kinase_activity	2	0.456579	Transcript_021167;Transcript_194245
GO:0032993	C:protein-DNA_complex	2	1	Transcript_012325;Transcript_237865
GO:0030674	F:protein_binding,_bridging	4	0.342182	Transcript_084804;Transcript_168419;Transcript_232898;Transcript_233779
GO:0016296	F:palmitoyl-acyl-carrier-protein_hydrolase_activity	4	1	Transcript_066148;Transcript_127755;Transcript_155023;Transcript_189857
GO:0006972	P:hyperosmotic_response	6	0.0235511	Transcript_004137;Transcript_090893;Transcript_149725;Transcript_203899;Transcript_230696;Transcript_241383
GO:0006897	P:endocytosis	39	8.20233e-12	Transcript_000897;Transcript_006433;Transcript_007264;Transcript_013395;Transcript_015592;Transcript_015912;Transcript_017478;Transcript_017912;Transcript_026408;Transcript_027502;Transcript_030232;Transcript_030500;Transcript_042508;Transcript_043323;Transcript_043900;Transcript_079019;Transcript_081735;Transcript_084020;Transcript_093969;Transcript_098313;Transcript_130458;Transcript_131949;Tra…
GO:1902183	P:regulation_of_shoot_apical_meristem_development	11	0.0533908	Transcript_023646;Transcript_023932;Transcript_028771;Transcript_042145;Transcript_042637;Transcript_085304;Transcript_105037;Transcript_154606;Transcript_155267;Transcript_213214;Transcript_226198
GO:0000266	P:mitochondrial_fission	3	0.639444	Transcript_103207;Transcript_212683;Transcript_223266
GO:0015105	F:arsenite_transmembrane_transporter_activity	3	1	Transcript_150281;Transcript_156652;Transcript_243963
GO:0034707	C:chloride_channel_complex_	12	0.786093	Transcript_000586;Transcript_029459;Transcript_043022;Transcript_062728;Transcript_083245;Transcript_104344;Transcript_110124;Transcript_165857;Transcript_195883;Transcript_224755;Transcript_225310;Transcript_229453
GO:0048511	P:rhythmic_process	16	0.040522	Transcript_002459;Transcript_017450;Transcript_029324;Transcript_034016;Transcript_035290;Transcript_043939;Transcript_063225;Transcript_098916;Transcript_113639;Transcript_129681;Transcript_167459;Transcript_167461;Transcript_190763;Transcript_226843;Transcript_229687;Transcript_236631
GO:0016984	F:ribulose-bisphosphate_carboxylase_activity	2	0.602246	Transcript_152864;Transcript_232012
GO:0050664	F:oxidoreductase_activity,_acting_on_NAD(P)H,_oxygen_as_acceptor	3	0.7609	Transcript_029297;Transcript_050169;Transcript_084515
GO:0007126	P:meiotic_nuclear_division	6	0.327925	Transcript_012586;Transcript_036301;Transcript_041366;Transcript_198318;Transcript_219169;Transcript_225968
GO:0000275	C:mitochondrial_proton-transporting_ATP_synthase_complex,_catalytic_core_F(1)	3	0.0793094	Transcript_085172;Transcript_205374;Transcript_207464
ko00564	Glycerophospholipid_metabolism	48	3.05147e-10	Transcript_004796;Transcript_008859;Transcript_015409;Transcript_018042;Transcript_018641;Transcript_018787;Transcript_029041;Transcript_029289;Transcript_034217;Transcript_037769;Transcript_038979;Transcript_041916;Transcript_043217;Transcript_043695;Transcript_064505;Transcript_076539;Transcript_082038;Transcript_089375;Transcript_096195;Transcript_098400;Transcript_106890;Transcript_111468;Tra…
GO:0003910	F:DNA_ligase_(ATP)_activity	3	0.639444	Transcript_040432;Transcript_196318;Transcript_241156
GO:0015824	P:proline_transport	3	0.237067	Transcript_050224;Transcript_088598;Transcript_194245
GO:0005319	F:lipid_transporter_activity	5	0.571511	Transcript_011706;Transcript_016519;Transcript_059959;Transcript_160717;Transcript_223881
GO:0009607	P:response_to_biotic_stimulus_	26	0.000669977	Transcript_000980;Transcript_006862;Transcript_008330;Transcript_025879;Transcript_025925;Transcript_035719;Transcript_042547;Transcript_045055;Transcript_097377;Transcript_116714;Transcript_155022;Transcript_158717;Transcript_176695;Transcript_181510;Transcript_188211;Transcript_191652;Transcript_201013;Transcript_215244;Transcript_224447;Transcript_226359;Transcript_229396;Transcript_231620;Tra…
GO:0004845	F:uracil_phosphoribosyltransferase_activity	3	0.135649	Transcript_103996;Transcript_224695;Transcript_234731
ko00532	Glycosaminoglycan_biosynthesis_-_chondroitin_sulfate_/_dermatan_sulfate	4	0.563109	Transcript_032994;Transcript_180845;Transcript_227762;Transcript_237268
GO:0009703	F:nitrate_reductase_(NADH)_activity	2	1	Transcript_224732;Transcript_243855
GO:0052901	F:spermine:oxygen_oxidoreductase_(spermidine-forming)_activity	3	0.805419	Transcript_223699;Transcript_238035;Transcript_240725
GO:0006430	P:lysyl-tRNA_aminoacylation	3	0.639444	Transcript_222973;Transcript_230969;Transcript_238419
GO:0048767	P:root_hair_elongation	9	0.00211735	Transcript_003467;Transcript_031485;Transcript_130684;Transcript_151452;Transcript_166700;Transcript_212610;Transcript_229566;Transcript_237078;Transcript_238113
GO:0007405	P:neuroblast_proliferation	2	1	Transcript_018328;Transcript_038714
ko00930	Caprolactam_degradation	3	0.506334	Transcript_186313;Transcript_221820;Transcript_228449
GO:0008806	F:carboxymethylenebutenolidase_activity	2	0.154885	Transcript_034463;Transcript_171265
GO:0031297	P:replication_fork_processing	2	0.343054	Transcript_078881;Transcript_166381
GO:0043021	F:ribonucleoprotein_complex_binding	6	0.596737	Transcript_003573;Transcript_089683;Transcript_146755;Transcript_151808;Transcript_165164;Transcript_205045
GO:0005881	C:cytoplasmic_microtubule	4	0.825415	Transcript_221863;Transcript_223031;Transcript_228725;Transcript_237868
GO:0032509	P:endosome_transport_via_multivesicular_body_sorting_pathway	3	0.645282	Transcript_199789;Transcript_240915;Transcript_244654
GO:0030173	C:integral_component_of_Golgi_membrane_	13	0.118531	Transcript_008404;Transcript_037788;Transcript_078372;Transcript_099681;Transcript_104833;Transcript_138224;Transcript_227030;Transcript_229747;Transcript_230334;Transcript_232031;Transcript_232209;Transcript_232212;Transcript_244192
GO:0008265	F:Mo-molybdopterin_cofactor_sulfurase_activity	4	0.316916	Transcript_024829;Transcript_184641;Transcript_208129;Transcript_240021
GO:0016301	F:kinase_activity	63	3.45686e-06	Transcript_004406;Transcript_006713;Transcript_007871;Transcript_014600;Transcript_014605;Transcript_015537;Transcript_015593;Transcript_019690;Transcript_021589;Transcript_025365;Transcript_028332;Transcript_031856;Transcript_041732;Transcript_042217;Transcript_042945;Transcript_043933;Transcript_047563;Transcript_052422;Transcript_053833;Transcript_056392;Transcript_074217;Transcript_080417;Tra…
GO:0005545	F:1-phosphatidylinositol_binding	9	0.0158617	Transcript_026408;Transcript_030232;Transcript_042508;Transcript_079019;Transcript_161356;Transcript_171440;Transcript_173049;Transcript_173572;Transcript_243579
GO:0006099	P:tricarboxylic_acid_cycle	52	1.82126e-05	Transcript_006928;Transcript_009200;Transcript_016804;Transcript_023212;Transcript_024584;Transcript_041745;Transcript_042399;Transcript_042444;Transcript_043070;Transcript_053362;Transcript_053448;Transcript_078929;Transcript_082809;Transcript_084580;Transcript_085286;Transcript_087227;Transcript_097665;Transcript_098609;Transcript_108861;Transcript_111072;Transcript_111363;Transcript_139088;Tra…
GO:0004664	F:prephenate_dehydratase_activity	2	0.19603	Transcript_021564;Transcript_190091
GO:0001889	P:liver_development	6	0.332244	Transcript_003076;Transcript_015457;Transcript_034880;Transcript_160763;Transcript_215505;Transcript_226879
GO:0010333	F:terpene_synthase_activity	6	0.0520104	Transcript_023348;Transcript_028663;Transcript_031929;Transcript_130655;Transcript_187927;Transcript_237715
GO:0007268	P:synaptic_transmission	6	0.596737	Transcript_023930;Transcript_062378;Transcript_067433;Transcript_202986;Transcript_222162;Transcript_241752
GO:0051013	P:microtubule_severing	3	0.303101	Transcript_036343;Transcript_042492;Transcript_128702
GO:0009102	P:biotin_biosynthetic_process	4	0.676899	Transcript_042372;Transcript_045297;Transcript_064328;Transcript_083116
GO:0019788	F:NEDD8_transferase_activity	2	0.456579	Transcript_017549;Transcript_054292
ko04727	GABAergic_synapse	15	0.0541405	Transcript_000897;Transcript_009421;Transcript_018746;Transcript_027624;Transcript_059638;Transcript_094165;Transcript_099027;Transcript_103108;Transcript_104899;Transcript_112191;Transcript_152779;Transcript_159737;Transcript_159739;Transcript_161004;Transcript_186342
ko04722	Neurotrophin_signaling_pathway	33	0.000265672	Transcript_004137;Transcript_005874;Transcript_013798;Transcript_015369;Transcript_015593;Transcript_017841;Transcript_018125;Transcript_021853;Transcript_024575;Transcript_027757;Transcript_033023;Transcript_037855;Transcript_043118;Transcript_058863;Transcript_069519;Transcript_072106;Transcript_087729;Transcript_131067;Transcript_150338;Transcript_150886;Transcript_162158;Transcript_172586;Tra…
GO:0015297	F:antiporter_activity	34	0.0003621	Transcript_015355;Transcript_018859;Transcript_023429;Transcript_031115;Transcript_034534;Transcript_036692;Transcript_041661;Transcript_042263;Transcript_042885;Transcript_055855;Transcript_056090;Transcript_073744;Transcript_090987;Transcript_140672;Transcript_140711;Transcript_151360;Transcript_156020;Transcript_158845;Transcript_161004;Transcript_172783;Transcript_173676;Transcript_192923;Tra…
GO:0009611	P:response_to_wounding	88	3.01213e-07	Transcript_000619;Transcript_000988;Transcript_003467;Transcript_006181;Transcript_009090;Transcript_009510;Transcript_012848;Transcript_013523;Transcript_014728;Transcript_014893;Transcript_015423;Transcript_016306;Transcript_016919;Transcript_020462;Transcript_021548;Transcript_022180;Transcript_023102;Transcript_024575;Transcript_027918;Transcript_029473;Transcript_029582;Transcript_030771;Tra…
GO:0071596	P:ubiquitin-dependent_protein_catabolic_process_via_the_N-end_rule_pathway	3	0.237067	Transcript_000563;Transcript_083662;Transcript_164096
GO:0043631	P:RNA_polyadenylation	7	0.518864	Transcript_005483;Transcript_020625;Transcript_024280;Transcript_124077;Transcript_222440;Transcript_224551;Transcript_233899
GO:0046912	F:transferase_activity,_transferring_acyl_groups,_acyl_groups_converted_into_alkyl_on_transfer	2	0.281171	Transcript_024584;Transcript_237893
GO:0051568	P:histone_H3-K4_methylation	8	0.034798	Transcript_008670;Transcript_026454;Transcript_068882;Transcript_168582;Transcript_183851;Transcript_199156;Transcript_225169;Transcript_240253
GO:0004630	F:phospholipase_D_activity	8	0.0168417	Transcript_029041;Transcript_098400;Transcript_153043;Transcript_181202;Transcript_195350;Transcript_206442;Transcript_236231;Transcript_238053
GO:0016328	C:lateral_plasma_membrane	4	0.0567059	Transcript_151249;Transcript_156652;Transcript_229174;Transcript_229953
GO:0010496	P:intercellular_transport	2	0.602246	Transcript_024871;Transcript_229953
GO:2000270	P:negative_regulation_of_fibroblast_apoptotic_process	2	0.154885	Transcript_057948;Transcript_175468
GO:0009959	P:negative_gravitropism	8	1	Transcript_009459;Transcript_023308;Transcript_064311;Transcript_187713;Transcript_199576;Transcript_231582;Transcript_233166;Transcript_234471
GO:0010048	P:vernalization_response	2	0.256238	Transcript_047596;Transcript_237879
GO:0006493	P:protein_O-linked_glycosylation	6	0.600422	Transcript_008419;Transcript_019663;Transcript_161886;Transcript_193833;Transcript_225507;Transcript_227127
GO:0019104	F:DNA_N-glycosylase_activity	10	0.737463	Transcript_017511;Transcript_095546;Transcript_117629;Transcript_143674;Transcript_161801;Transcript_197824;Transcript_221792;Transcript_224103;Transcript_231438;Transcript_238771
GO:0071260	P:cellular_response_to_mechanical_stimulus	2	1	Transcript_017841;Transcript_053463
GO:0000023	P:maltose_metabolic_process	6	0.600422	Transcript_005774;Transcript_013512;Transcript_016719;Transcript_076266;Transcript_077888;Transcript_079869
GO:0030018	C:Z_disc	8	0.034798	Transcript_015749;Transcript_020722;Transcript_072674;Transcript_221999;Transcript_224851;Transcript_226693;Transcript_230454;Transcript_239972
GO:0070301	P:cellular_response_to_hydrogen_peroxide	6	0.716775	Transcript_034581;Transcript_043848;Transcript_197384;Transcript_225871;Transcript_240445;Transcript_243724
GO:0061087	P:positive_regulation_of_histone_H3-K27_methylation	2	0.190669	Transcript_027836;Transcript_161886
GO:0006468	P:protein_phosphorylation	70	4.79278e-11	Transcript_000361;Transcript_012367;Transcript_016490;Transcript_017006;Transcript_017235;Transcript_017841;Transcript_019690;Transcript_020615;Transcript_021589;Transcript_024636;Transcript_027097;Transcript_031338;Transcript_031856;Transcript_043933;Transcript_044950;Transcript_045110;Transcript_047563;Transcript_052735;Transcript_053833;Transcript_061214;Transcript_089411;Transcript_090216;Tra…
GO:0051791	P:medium-chain_fatty_acid_metabolic_process	2	0.281171	Transcript_028541;Transcript_239945
GO:0006419	P:alanyl-tRNA_aminoacylation	2	0.19603	Transcript_056674;Transcript_141354
GO:0008047	F:enzyme_activator_activity	5	0.118091	Transcript_014604;Transcript_039086;Transcript_113522;Transcript_161886;Transcript_229017
ko00920	Sulfur_metabolism	14	0.00290887	Transcript_006215;Transcript_007377;Transcript_019193;Transcript_019778;Transcript_028100;Transcript_029193;Transcript_099453;Transcript_183950;Transcript_199275;Transcript_216545;Transcript_218059;Transcript_230957;Transcript_235761;Transcript_243351
GO:0045116	P:protein_neddylation	4	0.0102776	Transcript_017549;Transcript_054292;Transcript_166473;Transcript_192677
GO:0015936	P:coenzyme_A_metabolic_process	3	0.179749	Transcript_021285;Transcript_083878;Transcript_084504
GO:0005749	C:mitochondrial_respiratory_chain_complex_II,_succinate_dehydrogenase_complex_(ubiquinone)_	10	0.243054	Transcript_041745;Transcript_078929;Transcript_087227;Transcript_111363;Transcript_143268;Transcript_166507;Transcript_190135;Transcript_223224;Transcript_227997;Transcript_230646
GO:0008661	F:1-deoxy-D-xylulose-5-phosphate_synthase_activity_	2	0.0311089	Transcript_069394;Transcript_226851
GO:0008417	F:fucosyltransferase_activity	6	1	Transcript_067711;Transcript_109571;Transcript_135189;Transcript_154605;Transcript_162348;Transcript_227109
GO:0019628	P:urate_catabolic_process	3	0.393222	Transcript_006234;Transcript_008690;Transcript_170776
GO:0004733	F:pyridoxamine-phosphate_oxidase_activity	3	0.639444	Transcript_119263;Transcript_222444;Transcript_237457
GO:0007021	P:tubulin_complex_assembly	3	0.0765394	Transcript_062906;Transcript_173748;Transcript_226959
GO:0045039	P:protein_import_into_mitochondrial_inner_membrane	2	0.695033	Transcript_030989;Transcript_039319
GO:0042802	F:identical_protein_binding	66	4.04583e-07	Transcript_000361;Transcript_001527;Transcript_002537;Transcript_003002;Transcript_003800;Transcript_008093;Transcript_009564;Transcript_012934;Transcript_014534;Transcript_016768;Transcript_017180;Transcript_027814;Transcript_034710;Transcript_037982;Transcript_038194;Transcript_042077;Transcript_042510;Transcript_042846;Transcript_043173;Transcript_043411;Transcript_044536;Transcript_054059;Tra…
GO:0006334	P:nucleosome_assembly	20	0.00102034	Transcript_014853;Transcript_015850;Transcript_016164;Transcript_023663;Transcript_025733;Transcript_043808;Transcript_049156;Transcript_049826;Transcript_051974;Transcript_091307;Transcript_092014;Transcript_111090;Transcript_165053;Transcript_191918;Transcript_194208;Transcript_199370;Transcript_199914;Transcript_222696;Transcript_233818;Transcript_242617
GO:0006790	P:sulfur_compound_metabolic_process	6	0.107146	Transcript_019778;Transcript_025846;Transcript_028100;Transcript_099453;Transcript_183950;Transcript_230957
GO:0009072	P:aromatic_amino_acid_family_metabolic_process	4	0.544577	Transcript_121546;Transcript_130283;Transcript_225061;Transcript_230080
GO:0004743	F:pyruvate_kinase_activity	4	0.000194922	Transcript_000864;Transcript_043175;Transcript_044024;Transcript_113731
GO:0006829	P:zinc_II_ion_transport	8	0.255969	Transcript_000494;Transcript_003179;Transcript_017312;Transcript_088483;Transcript_098463;Transcript_150002;Transcript_196622;Transcript_227333
GO:0015760	P:glucose-6-phosphate_transport	2	0.595334	Transcript_041661;Transcript_242666
GO:0005516	F:calmodulin_binding	58	6.13206e-08	Transcript_009893;Transcript_010355;Transcript_011795;Transcript_013533;Transcript_016164;Transcript_016479;Transcript_018370;Transcript_020078;Transcript_022223;Transcript_025899;Transcript_026490;Transcript_026623;Transcript_028031;Transcript_028513;Transcript_028717;Transcript_030536;Transcript_032134;Transcript_039609;Transcript_043131;Transcript_043153;Transcript_043765;Transcript_044848;Tra…
GO:0031012	C:extracellular_matrix_	8	0.034798	Transcript_093665;Transcript_135727;Transcript_197673;Transcript_199269;Transcript_222697;Transcript_224482;Transcript_230705;Transcript_243602
GO:0043716	F:2-hydroxy-3-keto-5-methylthiopentenyl-1-phosphate_phosphatase_activity	2	1	Transcript_010578;Transcript_044766
GO:1903506	P:regulation_of_nucleic_acid-templated_transcription	3	1	Transcript_043536;Transcript_081822;Transcript_204709
ko01040	Biosynthesis_of_unsaturated_fatty_acids	22	0.0462185	Transcript_004823;Transcript_008856;Transcript_012173;Transcript_019331;Transcript_020272;Transcript_029488;Transcript_042481;Transcript_108468;Transcript_120778;Transcript_151169;Transcript_156645;Transcript_192035;Transcript_202366;Transcript_219524;Transcript_227665;Transcript_231679;Transcript_232162;Transcript_234956;Transcript_237837;Transcript_238313;Transcript_241367;Transcript_242645
GO:0004742	F:dihydrolipoyllysine-residue_acetyltransferase_activity	4	0.211787	Transcript_041807;Transcript_228599;Transcript_230358;Transcript_238957
GO:0010951	P:negative_regulation_of_endopeptidase_activity	5	0.189325	Transcript_032901;Transcript_059889;Transcript_184298;Transcript_186430;Transcript_237304
GO:0008252	F:nucleotidase_activity_	2	1	Transcript_188159;Transcript_229921
GO:0071446	P:cellular_response_to_salicylic_acid_stimulus	4	0.433453	Transcript_010355;Transcript_013533;Transcript_015537;Transcript_056392
GO:0004072	F:aspartate_kinase_activity	3	0.237067	Transcript_014765;Transcript_045644;Transcript_098122
GO:0070814	P:hydrogen_sulfide_biosynthetic_process	5	0.041257	Transcript_006215;Transcript_007377;Transcript_225231;Transcript_226519;Transcript_235761
GO:0016126	P:sterol_biosynthetic_process	21	0.00076232	Transcript_000988;Transcript_002537;Transcript_017796;Transcript_018717;Transcript_043845;Transcript_058180;Transcript_103343;Transcript_123603;Transcript_144277;Transcript_187074;Transcript_217321;Transcript_219463;Transcript_222051;Transcript_224373;Transcript_227784;Transcript_229566;Transcript_230167;Transcript_235147;Transcript_238658;Transcript_242409;Transcript_244569
GO:0005768	C:endosome_	165	1.92784e-20	Transcript_002026;Transcript_003758;Transcript_005595;Transcript_005880;Transcript_005928;Transcript_006193;Transcript_007379;Transcript_008140;Transcript_008292;Transcript_008404;Transcript_009045;Transcript_009608;Transcript_010111;Transcript_010173;Transcript_010967;Transcript_012922;Transcript_013262;Transcript_014046;Transcript_015307;Transcript_015416;Transcript_016091;Transcript_017478;Tra…
GO:0010584	P:pollen_exine_formation	20	0.018978	Transcript_003558;Transcript_006017;Transcript_017645;Transcript_027303;Transcript_028541;Transcript_040651;Transcript_044497;Transcript_057799;Transcript_059453;Transcript_078594;Transcript_100864;Transcript_105933;Transcript_138514;Transcript_154606;Transcript_169290;Transcript_173806;Transcript_220227;Transcript_233355;Transcript_239945;Transcript_243266
ko03013	RNA_transport	103	2.78434e-12	Transcript_002482;Transcript_003602;Transcript_005862;Transcript_007619;Transcript_013941;Transcript_014166;Transcript_016098;Transcript_016560;Transcript_017085;Transcript_017867;Transcript_021451;Transcript_021722;Transcript_022674;Transcript_022741;Transcript_023930;Transcript_027137;Transcript_027665;Transcript_030364;Transcript_034074;Transcript_041476;Transcript_042090;Transcript_042310;Tra…
ko05140	Leishmaniasis	4	0.125711	Transcript_072106;Transcript_199469;Transcript_223900;Transcript_230696
GO:0042132	F:fructose_1,6-bisphosphate_1-phosphatase_activity	4	0.342182	Transcript_009141;Transcript_011228;Transcript_232397;Transcript_238323
ko04623	Cytosolic_DNA-sensing_pathway	10	0.00268457	Transcript_005856;Transcript_021840;Transcript_024610;Transcript_045641;Transcript_150478;Transcript_200237;Transcript_204285;Transcript_239920;Transcript_240746;Transcript_241223
GO:0032876	P:negative_regulation_of_DNA_endoreduplication	2	0.343054	Transcript_057067;Transcript_103584
ko00362	Benzoate_degradation	2	0.0412318	Transcript_154295;Transcript_213391
GO:0090332	P:stomatal_closure	5	0.0701666	Transcript_008140;Transcript_043939;Transcript_088132;Transcript_222019;Transcript_234791
GO:0002182	P:cytoplasmic_translational_elongation	2	0.406345	Transcript_151359;Transcript_200889
GO:0042162	F:telomeric_DNA_binding	9	0.442827	Transcript_016940;Transcript_043166;Transcript_044881;Transcript_189892;Transcript_195595;Transcript_200275;Transcript_215242;Transcript_232785;Transcript_233446
GO:0008280	C:cohesin_core_heterodimer_	3	0.165222	Transcript_188455;Transcript_212650;Transcript_225968
GO:0043424	F:protein_histidine_kinase_binding	16	0.0600296	Transcript_007163;Transcript_019565;Transcript_042151;Transcript_051541;Transcript_059444;Transcript_084617;Transcript_106287;Transcript_113284;Transcript_137483;Transcript_149718;Transcript_228713;Transcript_231910;Transcript_238765;Transcript_240003;Transcript_241512;Transcript_243223
GO:0009834	P:plant-type_secondary_cell_wall_biogenesis	17	0.013677	Transcript_002958;Transcript_009608;Transcript_027303;Transcript_029920;Transcript_032955;Transcript_055390;Transcript_058415;Transcript_059453;Transcript_149060;Transcript_151449;Transcript_162948;Transcript_195279;Transcript_222229;Transcript_226538;Transcript_227931;Transcript_237295;Transcript_244276
GO:0000793	C:condensed_chromosome_	2	0.0161315	Transcript_228710;Transcript_236631
GO:0045088	P:regulation_of_innate_immune_response	2	0.456579	Transcript_210991;Transcript_228710
GO:0080115	F:myosin_XI_tail_binding	2	0.190669	Transcript_165340;Transcript_234826
GO:0006412	P:translation	330	1.45491e-33	Transcript_000250;Transcript_000260;Transcript_000373;Transcript_000399;Transcript_001111;Transcript_002363;Transcript_002555;Transcript_002658;Transcript_003860;Transcript_004322;Transcript_004360;Transcript_004748;Transcript_005041;Transcript_005881;Transcript_007059;Transcript_007166;Transcript_007168;Transcript_007278;Transcript_007649;Transcript_008453;Transcript_008644;Transcript_009487;Tra…
GO:0007142	P:male_meiosis_II_	2	1	Transcript_105826;Transcript_171229
GO:0080156	P:mitochondrial_mRNA_modification	4	0.0427763	Transcript_049582;Transcript_180287;Transcript_233133;Transcript_233790
GO:0030308	P:negative_regulation_of_cell_growth	4	0.0250591	Transcript_002815;Transcript_035826;Transcript_080393;Transcript_160231
GO:0052663	F:antheraxanthin_epoxidase_activity	4	1	Transcript_026153;Transcript_034427;Transcript_069974;Transcript_152061
GO:0009330	C:DNA_topoisomerase_complex_(ATP-hydrolyzing)	2	1	Transcript_236631;Transcript_238442
GO:0034605	P:cellular_response_to_heat	16	0.00970238	Transcript_001458;Transcript_003145;Transcript_032994;Transcript_062597;Transcript_091277;Transcript_094361;Transcript_119510;Transcript_152444;Transcript_172586;Transcript_174797;Transcript_178079;Transcript_195257;Transcript_229930;Transcript_232898;Transcript_234898;Transcript_240246
GO:0032783	C:ELL-EAF_complex_	2	0.154885	Transcript_033171;Transcript_164189
GO:0009245	P:lipid_A_biosynthetic_process	4	0.268461	Transcript_084524;Transcript_168207;Transcript_194528;Transcript_235637
GO:0007613	P:memory	3	0.645282	Transcript_045070;Transcript_154171;Transcript_237905
GO:0015949	P:nucleobase-containing_small_molecule_interconversion	2	0.281171	Transcript_015354;Transcript_242056
GO:0004034	F:aldose_1-epimerase_activity	3	1	Transcript_043532;Transcript_078007;Transcript_161647
GO:0019419	P:sulfate_reduction	2	0.595334	Transcript_227780;Transcript_238482
GO:0090116	P:C-5_methylation_of_cytosine	2	0.343054	Transcript_119510;Transcript_233298
GO:0016887	F:ATPase_activity	97	1.12141e-09	Transcript_000114;Transcript_000897;Transcript_003883;Transcript_005104;Transcript_006315;Transcript_007464;Transcript_007995;Transcript_008223;Transcript_008842;Transcript_009074;Transcript_014414;Transcript_014498;Transcript_014827;Transcript_015265;Transcript_016370;Transcript_017225;Transcript_019041;Transcript_019689;Transcript_020492;Transcript_021257;Transcript_025609;Transcript_027194;Tra…
GO:0015114	F:phosphate_ion_transmembrane_transporter_activity	11	0.505963	Transcript_002893;Transcript_008667;Transcript_018246;Transcript_043811;Transcript_056996;Transcript_057533;Transcript_123438;Transcript_210800;Transcript_225198;Transcript_228172;Transcript_228239
GO:0006816	P:calcium_ion_transport	16	0.0147006	Transcript_017373;Transcript_038359;Transcript_045444;Transcript_053463;Transcript_089910;Transcript_107188;Transcript_147654;Transcript_172493;Transcript_181118;Transcript_225982;Transcript_227132;Transcript_227187;Transcript_230951;Transcript_232362;Transcript_232512;Transcript_235245
GO:0008091	C:spectrin	2	0.281171	Transcript_026391;Transcript_151249
GO:0019827	P:stem_cell_maintenance	3	0.393222	Transcript_016284;Transcript_044881;Transcript_233446
GO:0008641	F:small_protein_activating_enzyme_activity	2	0.343054	Transcript_080364;Transcript_214435
GO:0009616	P:virus_induced_gene_silencing	3	0.00518747	Transcript_000262;Transcript_023059;Transcript_163678
GO:0010928	P:regulation_of_auxin_mediated_signaling_pathway	6	0.134191	Transcript_018802;Transcript_042002;Transcript_150338;Transcript_159221;Transcript_233847;Transcript_234684
GO:0009698	P:phenylpropanoid_metabolic_process	5	0.0105071	Transcript_198557;Transcript_225390;Transcript_225851;Transcript_237053;Transcript_242305
GO:0046827	P:positive_regulation_of_protein_export_from_nucleus	4	0.783799	Transcript_044950;Transcript_172586;Transcript_174846;Transcript_188104
GO:0017113	F:dihydropyrimidine_dehydrogenase_(NADP+)_activity	2	0.695033	Transcript_060127;Transcript_118070
GO:0010287	C:plastoglobule	16	3.8927e-08	Transcript_021548;Transcript_021772;Transcript_034467;Transcript_045938;Transcript_106288;Transcript_116194;Transcript_155928;Transcript_160052;Transcript_162817;Transcript_167087;Transcript_167859;Transcript_170891;Transcript_193458;Transcript_217493;Transcript_229731;Transcript_240528
GO:0005388	F:calcium-transporting_ATPase_activity	26	0.0600393	Transcript_003561;Transcript_007843;Transcript_014073;Transcript_017675;Transcript_018271;Transcript_028513;Transcript_030536;Transcript_044908;Transcript_045266;Transcript_046326;Transcript_054446;Transcript_059600;Transcript_069637;Transcript_089910;Transcript_107188;Transcript_107906;Transcript_152707;Transcript_215906;Transcript_225162;Transcript_225324;Transcript_226334;Transcript_227187;Tra…
GO:0005732	C:small_nucleolar_ribonucleoprotein_complex	12	0.00822022	Transcript_003601;Transcript_014001;Transcript_018130;Transcript_043981;Transcript_144780;Transcript_149417;Transcript_156484;Transcript_187619;Transcript_212567;Transcript_226381;Transcript_233509;Transcript_240140
GO:0048440	P:carpel_development	2	0.14426	Transcript_163678;Transcript_192410
GO:0000125	C:PCAF_complex	3	0.527991	Transcript_043536;Transcript_081822;Transcript_204709
GO:0015755	P:fructose_transport	2	0.154885	Transcript_150379;Transcript_231756
GO:0000753	P:cell_morphogenesis_involved_in_conjugation_with_cellular_fusion	2	0.695033	Transcript_015977;Transcript_237857
ko05164	Influenza_A	30	0.0002169	Transcript_002482;Transcript_004137;Transcript_004400;Transcript_007619;Transcript_009220;Transcript_013798;Transcript_022279;Transcript_022674;Transcript_024575;Transcript_033023;Transcript_043364;Transcript_069212;Transcript_072106;Transcript_098438;Transcript_150520;Transcript_170584;Transcript_172586;Transcript_173644;Transcript_189001;Transcript_193140;Transcript_193507;Transcript_199469;Tra…
GO:0019760	P:glucosinolate_metabolic_process	3	0.639444	Transcript_130283;Transcript_225061;Transcript_230080
GO:0004672	F:protein_kinase_activity	104	1.37853e-21	Transcript_000361;Transcript_000518;Transcript_002815;Transcript_003555;Transcript_006813;Transcript_007873;Transcript_009893;Transcript_010355;Transcript_013533;Transcript_014265;Transcript_016649;Transcript_016757;Transcript_017006;Transcript_017235;Transcript_017841;Transcript_018286;Transcript_018722;Transcript_019067;Transcript_019690;Transcript_021733;Transcript_022223;Transcript_031856;Tra…
GO:0030288	C:outer_membrane-bounded_periplasmic_space	2	1	Transcript_032050;Transcript_186458
ko00909	Sesquiterpenoid_and_triterpenoid_biosynthesis	9	0.652249	Transcript_000367;Transcript_000988;Transcript_028663;Transcript_029654;Transcript_032229;Transcript_090633;Transcript_178720;Transcript_236114;Transcript_241103
GO:0006098	P:pentose-phosphate_shunt	33	0.00661875	Transcript_005159;Transcript_011560;Transcript_026687;Transcript_036028;Transcript_042081;Transcript_042330;Transcript_044519;Transcript_063912;Transcript_084874;Transcript_087536;Transcript_102074;Transcript_108985;Transcript_130283;Transcript_136272;Transcript_140584;Transcript_146545;Transcript_156831;Transcript_192522;Transcript_200667;Transcript_222150;Transcript_225061;Transcript_225858;Tra…
GO:0007422	P:peripheral_nervous_system_development	3	0.7609	Transcript_016710;Transcript_149814;Transcript_184391
GO:0006105	P:succinate_metabolic_process	2	0.105779	Transcript_183784;Transcript_243992
GO:0060359	P:response_to_ammonium_ion	2	0.19603	Transcript_195203;Transcript_231582
GO:0000175	F:3'-5'-exoribonuclease_activity	10	0.0375442	Transcript_004862;Transcript_005385;Transcript_008914;Transcript_009427;Transcript_012170;Transcript_183290;Transcript_220365;Transcript_222553;Transcript_237727;Transcript_239311
GO:0000911	P:cytokinesis_by_cell_plate_formation	27	0.000114126	Transcript_007995;Transcript_015265;Transcript_016524;Transcript_017085;Transcript_019030;Transcript_019689;Transcript_019884;Transcript_023059;Transcript_042258;Transcript_043358;Transcript_055492;Transcript_062396;Transcript_080710;Transcript_104729;Transcript_154881;Transcript_156560;Transcript_161482;Transcript_199471;Transcript_207229;Transcript_214657;Transcript_228126;Transcript_230696;Tra…
GO:0043086	P:negative_regulation_of_catalytic_activity	12	0.193748	Transcript_006967;Transcript_014604;Transcript_026520;Transcript_044004;Transcript_152339;Transcript_178569;Transcript_186430;Transcript_194208;Transcript_224690;Transcript_229684;Transcript_231828;Transcript_235380
GO:0016461	C:unconventional_myosin_complex_	3	1	Transcript_011795;Transcript_170498;Transcript_223009
ko05217	Basal_cell_carcinoma	3	0.805419	Transcript_004137;Transcript_013798;Transcript_172586
GO:0071994	P:phytochelatin_transmembrane_transport	2	0.281171	Transcript_007741;Transcript_106913
GO:0071731	P:response_to_nitric_oxide	2	0.406345	Transcript_038402;Transcript_151890
GO:0014823	P:response_to_activity	3	1	Transcript_043609;Transcript_150276;Transcript_221820
GO:0042147	P:retrograde_transport,_endosome_to_Golgi	15	0.00345347	Transcript_011369;Transcript_015116;Transcript_033802;Transcript_039015;Transcript_044539;Transcript_127350;Transcript_152193;Transcript_158918;Transcript_161644;Transcript_206246;Transcript_227642;Transcript_227745;Transcript_233788;Transcript_238501;Transcript_240790
GO:0007291	P:sperm_individualization	3	0.506334	Transcript_009220;Transcript_011795;Transcript_056952
GO:0033989	F:3alpha,7alpha,12alpha-trihydroxy-5beta-cholest-24-enoyl-CoA_hydratase_activity	2	0.281171	Transcript_186294;Transcript_206123
GO:0035145	C:exon-exon_junction_complex	3	0.7609	Transcript_096223;Transcript_124057;Transcript_240874
GO:0009522	C:photosystem_I	27	0.0117192	Transcript_001458;Transcript_015999;Transcript_029009;Transcript_034467;Transcript_041806;Transcript_042714;Transcript_043301;Transcript_044033;Transcript_049019;Transcript_061257;Transcript_094001;Transcript_094361;Transcript_099716;Transcript_106092;Transcript_127348;Transcript_155928;Transcript_160052;Transcript_185029;Transcript_209826;Transcript_216863;Transcript_223379;Transcript_224850;Tra…
GO:0010018	P:far-red_light_signaling_pathway	5	0.46668	Transcript_016768;Transcript_019499;Transcript_150535;Transcript_159497;Transcript_236712
GO:0048437	P:floral_organ_development	4	0.0102776	Transcript_016757;Transcript_024441;Transcript_062938;Transcript_106795
GO:0016324	C:apical_plasma_membrane	18	0.0705935	Transcript_008939;Transcript_009286;Transcript_030514;Transcript_054075;Transcript_075635;Transcript_093404;Transcript_104344;Transcript_112952;Transcript_150661;Transcript_151452;Transcript_151830;Transcript_185415;Transcript_212610;Transcript_229953;Transcript_234035;Transcript_237913;Transcript_240386;Transcript_242160
GO:0008889	F:glycerophosphodiester_phosphodiesterase_activity	7	0.0616767	Transcript_004742;Transcript_018183;Transcript_027546;Transcript_039564;Transcript_149716;Transcript_221862;Transcript_227040
GO:0000154	P:rRNA_modification	3	0.393222	Transcript_003601;Transcript_018130;Transcript_149417
ko00942	Anthocyanin_biosynthesis	3	0.25427	Transcript_009214;Transcript_165735;Transcript_225851
GO:0016314	F:phosphatidylinositol-3,4,5-trisphosphate_3-phosphatase_activity	3	1	Transcript_004615;Transcript_035784;Transcript_112814
GO:0050404	F:zeatin_O-beta-D-xylosyltransferase_activity	3	0.25427	Transcript_161063;Transcript_199123;Transcript_244225
GO:0002098	P:tRNA_wobble_uridine_modification	6	0.332244	Transcript_013972;Transcript_014451;Transcript_026493;Transcript_032961;Transcript_136564;Transcript_149452
GO:0016614	F:oxidoreductase_activity,_acting_on_CH-OH_group_of_donors	6	1	Transcript_111361;Transcript_171926;Transcript_204402;Transcript_223635;Transcript_241844;Transcript_242560
GO:0046168	P:glycerol-3-phosphate_catabolic_process	2	0.602246	Transcript_104660;Transcript_238146
GO:0009624	P:response_to_nematode	34	5.73187e-05	Transcript_006315;Transcript_019884;Transcript_027798;Transcript_028513;Transcript_030536;Transcript_041661;Transcript_042145;Transcript_042637;Transcript_043358;Transcript_043973;Transcript_045266;Transcript_085304;Transcript_090987;Transcript_105037;Transcript_139724;Transcript_150379;Transcript_152707;Transcript_155832;Transcript_156020;Transcript_173676;Transcript_215906;Transcript_226334;Tra…
GO:0042629	C:mast_cell_granule	2	0.154885	Transcript_043848;Transcript_225871
ko04391	Hippo_signaling_pathway_-_fly	16	0.0181429	Transcript_009220;Transcript_011213;Transcript_015369;Transcript_025560;Transcript_027757;Transcript_037855;Transcript_069519;Transcript_087729;Transcript_131067;Transcript_133924;Transcript_184912;Transcript_186849;Transcript_222069;Transcript_222223;Transcript_227790;Transcript_243153
GO:1901215	P:negative_regulation_of_neuron_death	3	0.527991	Transcript_023930;Transcript_197384;Transcript_240445
GO:0045548	F:phenylalanine_ammonia-lyase_activity	3	0.303101	Transcript_016111;Transcript_018189;Transcript_062694
GO:0005452	F:inorganic_anion_exchanger_activity	5	0.115629	Transcript_006230;Transcript_062315;Transcript_224754;Transcript_239532;Transcript_240431
GO:0032153	C:cell_division_site	8	0.0880935	Transcript_006433;Transcript_015977;Transcript_017235;Transcript_197443;Transcript_214298;Transcript_231531;Transcript_234911;Transcript_242111
GO:0009524	C:phragmoplast	61	4.1867e-08	Transcript_007995;Transcript_008240;Transcript_008470;Transcript_013800;Transcript_014434;Transcript_014710;Transcript_015213;Transcript_015265;Transcript_016337;Transcript_019030;Transcript_019689;Transcript_019884;Transcript_022136;Transcript_028117;Transcript_028208;Transcript_028761;Transcript_033023;Transcript_043358;Transcript_044661;Transcript_048706;Transcript_049860;Transcript_055492;Tra…
GO:0004864	F:protein_phosphatase_inhibitor_activity	7	0.618024	Transcript_006967;Transcript_026520;Transcript_044004;Transcript_152339;Transcript_194208;Transcript_229684;Transcript_235380
GO:0010196	P:nonphotochemical_quenching	3	0.102019	Transcript_034467;Transcript_160052;Transcript_194366
GO:0016592	C:mediator_complex_	23	0.00654998	Transcript_007006;Transcript_007580;Transcript_015201;Transcript_026796;Transcript_044287;Transcript_068885;Transcript_069082;Transcript_082275;Transcript_095357;Transcript_099166;Transcript_155906;Transcript_158407;Transcript_175498;Transcript_188742;Transcript_198557;Transcript_207416;Transcript_222692;Transcript_223390;Transcript_230792;Transcript_237053;Transcript_242305;Transcript_242363;Tra…
GO:0007588	P:excretion	2	0.595334	Transcript_192739;Transcript_230201
GO:0005983	P:starch_catabolic_process	12	0.323105	Transcript_003099;Transcript_004377;Transcript_014962;Transcript_018355;Transcript_029413;Transcript_088314;Transcript_148938;Transcript_156316;Transcript_190885;Transcript_232397;Transcript_240205;Transcript_243510
GO:0005665	C:DNA-directed_RNA_polymerase_II,_core_complex_	19	0.0139688	Transcript_017325;Transcript_024610;Transcript_029815;Transcript_030747;Transcript_032884;Transcript_039697;Transcript_045115;Transcript_045641;Transcript_049751;Transcript_120290;Transcript_150478;Transcript_153412;Transcript_177018;Transcript_191298;Transcript_213037;Transcript_241223;Transcript_241791;Transcript_243535;Transcript_244633
GO:0003872	F:6-phosphofructokinase_activity	8	0.0880935	Transcript_009341;Transcript_030690;Transcript_075145;Transcript_183343;Transcript_213712;Transcript_224279;Transcript_227226;Transcript_237343
GO:1901537	P:positive_regulation_of_DNA_demethylation	2	0.406345	Transcript_061542;Transcript_101284
GO:0045281	C:succinate_dehydrogenase_complex	3	0.393222	Transcript_143477;Transcript_168585;Transcript_193240
GO:0004806	F:triglyceride_lipase_activity_	7	0.000912167	Transcript_004006;Transcript_005637;Transcript_102091;Transcript_122663;Transcript_223155;Transcript_237545;Transcript_238067
GO:0005980	P:glycogen_catabolic_process	3	0.645282	Transcript_015749;Transcript_229878;Transcript_243338
ko00280	Valine,_leucine_and_isoleucine_degradation	40	1.06697e-07	Transcript_001574;Transcript_014643;Transcript_017990;Transcript_021635;Transcript_024387;Transcript_026348;Transcript_029683;Transcript_034880;Transcript_035710;Transcript_040344;Transcript_042481;Transcript_042657;Transcript_042860;Transcript_043867;Transcript_075241;Transcript_107327;Transcript_126947;Transcript_132356;Transcript_149539;Transcript_154295;Transcript_155415;Transcript_159265;Tra…
GO:0097298	P:regulation_of_nucleus_size	2	1	Transcript_005215;Transcript_235808
GO:0043171	P:peptide_catabolic_process	3	0.232394	Transcript_039672;Transcript_146634;Transcript_203217
GO:0006915	P:apoptotic_process	34	0.000792808	Transcript_004615;Transcript_004696;Transcript_006795;Transcript_008644;Transcript_016621;Transcript_022761;Transcript_026456;Transcript_035784;Transcript_057948;Transcript_060015;Transcript_076614;Transcript_087523;Transcript_095175;Transcript_100239;Transcript_112814;Transcript_124057;Transcript_135659;Transcript_138761;Transcript_149157;Transcript_149528;Transcript_151127;Transcript_155035;Tra…
GO:0010428	F:methyl-CpNpG_binding	4	0.671724	Transcript_018951;Transcript_102940;Transcript_222854;Transcript_243218
GO:0006642	P:triglyceride_mobilization	2	0.281171	Transcript_022259;Transcript_079851
GO:0002237	P:response_to_molecule_of_bacterial_origin	11	0.777903	Transcript_001411;Transcript_013227;Transcript_013523;Transcript_014548;Transcript_016461;Transcript_017025;Transcript_024575;Transcript_132647;Transcript_158984;Transcript_226818;Transcript_230686
GO:0005290	F:L-histidine_transmembrane_transporter_activity	6	1	Transcript_009968;Transcript_090893;Transcript_130814;Transcript_161004;Transcript_201742;Transcript_236224
GO:0051880	F:G-quadruplex_DNA_binding	2	1	Transcript_068956;Transcript_199136
GO:0070865	C:investment_cone	3	0.165222	Transcript_011795;Transcript_181944;Transcript_217583
GO:1900034	P:regulation_of_cellular_response_to_heat	5	1	Transcript_091277;Transcript_152444;Transcript_172586;Transcript_232898;Transcript_240246
ko04713	Circadian_entrainment	5	0.0538564	Transcript_018125;Transcript_031338;Transcript_072106;Transcript_223900;Transcript_230696
ko00300	Lysine_biosynthesis	13	0.0541702	Transcript_002738;Transcript_014504;Transcript_014765;Transcript_015376;Transcript_017990;Transcript_029266;Transcript_033448;Transcript_035921;Transcript_098122;Transcript_108020;Transcript_193127;Transcript_226676;Transcript_233116
GO:0008168	F:methyltransferase_activity	54	4.23341e-07	Transcript_007812;Transcript_009517;Transcript_009773;Transcript_010202;Transcript_020605;Transcript_025633;Transcript_025729;Transcript_026163;Transcript_033155;Transcript_040112;Transcript_042433;Transcript_044771;Transcript_046504;Transcript_049017;Transcript_074886;Transcript_076539;Transcript_082284;Transcript_100298;Transcript_102284;Transcript_102940;Transcript_106163;Transcript_110784;Tra…
GO:0047655	F:allyl-alcohol_dehydrogenase_activity_	4	0.79695	Transcript_117336;Transcript_198989;Transcript_227764;Transcript_231657
GO:0010020	P:chloroplast_fission	7	0.0616767	Transcript_001527;Transcript_003002;Transcript_044704;Transcript_099475;Transcript_196053;Transcript_225647;Transcript_232090
GO:0072583	P:clathrin-mediated_endocytosis	7	0.352837	Transcript_023412;Transcript_044305;Transcript_075635;Transcript_156391;Transcript_181910;Transcript_185415;Transcript_193877
GO:0048046	C:apoplast_	147	3.16011e-17	Transcript_000167;Transcript_001808;Transcript_002074;Transcript_003638;Transcript_003701;Transcript_004122;Transcript_005138;Transcript_005159;Transcript_006747;Transcript_007704;Transcript_008274;Transcript_009143;Transcript_009542;Transcript_011203;Transcript_012139;Transcript_014398;Transcript_014970;Transcript_015537;Transcript_016257;Transcript_016440;Transcript_017551;Transcript_019000;Tra…
GO:0008541	C:proteasome_regulatory_particle,_lid_subcomplex	4	1	Transcript_032242;Transcript_175656;Transcript_223050;Transcript_227617
GO:0051788	P:response_to_misfolded_protein	7	1	Transcript_031485;Transcript_041745;Transcript_043839;Transcript_166700;Transcript_172472;Transcript_201417;Transcript_225342
GO:0003950	F:NAD+_ADP-ribosyltransferase_activity	5	0.0244423	Transcript_008468;Transcript_023059;Transcript_085990;Transcript_233846;Transcript_239373
GO:0015238	F:drug_transmembrane_transporter_activity	23	0.00654998	Transcript_002649;Transcript_017321;Transcript_042263;Transcript_042995;Transcript_056090;Transcript_060031;Transcript_140711;Transcript_168034;Transcript_173190;Transcript_173478;Transcript_173676;Transcript_174219;Transcript_175523;Transcript_203255;Transcript_204015;Transcript_224278;Transcript_229365;Transcript_230671;Transcript_232296;Transcript_235568;Transcript_235816;Transcript_236565;Tra…
GO:0042742	P:defense_response_to_bacterium	107	3.2998e-14	Transcript_000114;Transcript_001411;Transcript_002074;Transcript_002509;Transcript_004195;Transcript_006800;Transcript_007081;Transcript_007729;Transcript_007992;Transcript_009143;Transcript_011203;Transcript_013227;Transcript_013501;Transcript_013523;Transcript_015989;Transcript_017025;Transcript_017243;Transcript_017317;Transcript_017369;Transcript_019242;Transcript_021548;Transcript_023102;Tra…
GO:0035646	P:endosome_to_melanosome_transport	3	1	Transcript_017876;Transcript_048455;Transcript_173643
GO:0090558	P:plant_epidermis_development	2	0.595334	Transcript_006997;Transcript_017724
ko04341	Hedgehog_signaling_pathway_-_fly	21	1.15211e-05	Transcript_004137;Transcript_013798;Transcript_017223;Transcript_022136;Transcript_031835;Transcript_043411;Transcript_047128;Transcript_089035;Transcript_097747;Transcript_107809;Transcript_114639;Transcript_117496;Transcript_149776;Transcript_172586;Transcript_192182;Transcript_226337;Transcript_230723;Transcript_234354;Transcript_235212;Transcript_235721;Transcript_240901
GO:0001669	C:acrosomal_vesicle_	2	1	Transcript_084989;Transcript_152576
GO:0010252	P:auxin_homeostasis	8	0.0443369	Transcript_015508;Transcript_021674;Transcript_062654;Transcript_080441;Transcript_130684;Transcript_169941;Transcript_174347;Transcript_205465
GO:0060119	P:inner_ear_receptor_cell_development	2	0.343054	Transcript_224875;Transcript_235043
ko05203	Viral_carcinogenesis	61	4.50323e-13	Transcript_000864;Transcript_005211;Transcript_005845;Transcript_006445;Transcript_008449;Transcript_014718;Transcript_015369;Transcript_021853;Transcript_026022;Transcript_026538;Transcript_027757;Transcript_037855;Transcript_042486;Transcript_043118;Transcript_043175;Transcript_044024;Transcript_047526;Transcript_058863;Transcript_066276;Transcript_069519;Transcript_070040;Transcript_072106;Tra…
GO:0031625	F:ubiquitin_protein_ligase_binding	185	1.00977e-22	Transcript_001505;Transcript_002815;Transcript_003470;Transcript_004406;Transcript_006281;Transcript_006813;Transcript_006997;Transcript_007730;Transcript_007871;Transcript_008282;Transcript_008597;Transcript_008894;Transcript_009319;Transcript_010355;Transcript_010393;Transcript_013070;Transcript_013533;Transcript_014113;Transcript_014332;Transcript_014496;Transcript_016479;Transcript_016769;Tra…
ko04650	Natural_killer_cell_mediated_cytotoxicity	22	0.0654794	Transcript_010012;Transcript_012094;Transcript_021853;Transcript_024575;Transcript_033023;Transcript_043118;Transcript_058863;Transcript_059039;Transcript_072106;Transcript_092873;Transcript_150338;Transcript_150886;Transcript_162158;Transcript_207470;Transcript_223900;Transcript_224126;Transcript_230020;Transcript_230696;Transcript_231953;Transcript_236061;Transcript_239220;Transcript_241854
GO:0030544	F:Hsp70_protein_binding	2	0.0431288	Transcript_239548;Transcript_240246
GO:0015031	P:protein_transport	197	3.21925e-33	Transcript_004905;Transcript_006668;Transcript_007391;Transcript_007619;Transcript_009564;Transcript_009640;Transcript_010537;Transcript_013395;Transcript_013464;Transcript_013571;Transcript_016524;Transcript_017124;Transcript_017646;Transcript_017817;Transcript_017847;Transcript_018434;Transcript_019722;Transcript_021125;Transcript_021642;Transcript_022069;Transcript_023404;Transcript_023676;Tra…
GO:0016024	P:CDP-diacylglycerol_biosynthetic_process	11	0.2155	Transcript_000605;Transcript_008859;Transcript_018641;Transcript_026263;Transcript_029295;Transcript_034217;Transcript_148144;Transcript_186728;Transcript_205296;Transcript_232953;Transcript_242653
GO:0004563	F:beta-N-acetylhexosaminidase_activity	3	0.179749	Transcript_185643;Transcript_196234;Transcript_222646
ko00061	Fatty_acid_biosynthesis	32	0.00113736	Transcript_008856;Transcript_009590;Transcript_012173;Transcript_013621;Transcript_019427;Transcript_020272;Transcript_025262;Transcript_027173;Transcript_027403;Transcript_028277;Transcript_029488;Transcript_038714;Transcript_048031;Transcript_086679;Transcript_103595;Transcript_112171;Transcript_127755;Transcript_151169;Transcript_156528;Transcript_157145;Transcript_175722;Transcript_177792;Tra…
GO:0016758	F:transferase_activity,_transferring_hexosyl_groups	30	0.000267932	Transcript_000770;Transcript_002693;Transcript_003491;Transcript_003743;Transcript_009167;Transcript_010048;Transcript_010952;Transcript_013868;Transcript_018001;Transcript_021872;Transcript_027809;Transcript_032968;Transcript_050470;Transcript_116024;Transcript_142524;Transcript_150572;Transcript_157275;Transcript_161063;Transcript_169106;Transcript_178610;Transcript_190722;Transcript_199123;Tra…
GO:0004491	F:methylmalonate-semialdehyde_dehydrogenase_(acylating)_activity	2	1	Transcript_012296;Transcript_190050
GO:0016926	P:protein_desumoylation	3	0.232394	Transcript_032955;Transcript_167684;Transcript_244041
GO:0097191	P:extrinsic_apoptotic_signaling_pathway	2	0.281171	Transcript_009408;Transcript_224368
GO:0005375	F:copper_ion_transmembrane_transporter_activity	3	0.639444	Transcript_009558;Transcript_035843;Transcript_182184
GO:0009252	P:peptidoglycan_biosynthetic_process	3	0.506334	Transcript_037895;Transcript_093147;Transcript_228178
GO:0048507	P:meristem_development	5	0.696697	Transcript_006567;Transcript_113130;Transcript_180054;Transcript_243937;Transcript_244653
GO:0001046	F:core_promoter_sequence-specific_DNA_binding	2	0.456579	Transcript_033085;Transcript_226246
GO:0008272	P:sulfate_transport	3	0.135649	Transcript_148056;Transcript_207585;Transcript_238765
GO:0009992	P:cellular_water_homeostasis	15	0.024287	Transcript_009157;Transcript_020502;Transcript_029097;Transcript_042811;Transcript_052552;Transcript_150281;Transcript_156652;Transcript_167494;Transcript_184393;Transcript_188161;Transcript_225565;Transcript_232414;Transcript_239536;Transcript_243963;Transcript_244862
GO:0010029	P:regulation_of_seed_germination	14	9.21611e-05	Transcript_002637;Transcript_016768;Transcript_018199;Transcript_025134;Transcript_030182;Transcript_031485;Transcript_031856;Transcript_038218;Transcript_044805;Transcript_087490;Transcript_163791;Transcript_166700;Transcript_199971;Transcript_238765
GO:0007093	P:mitotic_cell_cycle_checkpoint	3	1	Transcript_182959;Transcript_186849;Transcript_231597
GO:0048574	P:long-day_photoperiodism,_flowering	4	0.27286	Transcript_017085;Transcript_021463;Transcript_026055;Transcript_212448
GO:0004449	F:isocitrate_dehydrogenase_(NAD+)_activity	5	0.575187	Transcript_098609;Transcript_150032;Transcript_201132;Transcript_223750;Transcript_235177
GO:0030060	F:L-malate_dehydrogenase_activity	4	0.0138474	Transcript_053362;Transcript_082809;Transcript_108861;Transcript_224340
GO:0004784	F:superoxide_dismutase_activity	10	0.166839	Transcript_053327;Transcript_064710;Transcript_067992;Transcript_073903;Transcript_118184;Transcript_130631;Transcript_223131;Transcript_226089;Transcript_232374;Transcript_233833
GO:0003861	F:3-isopropylmalate_dehydratase_activity_	3	1	Transcript_010400;Transcript_230378;Transcript_230674
GO:0031314	C:extrinsic_component_of_mitochondrial_inner_membrane_	5	1	Transcript_000605;Transcript_025583;Transcript_029289;Transcript_038594;Transcript_175303
GO:0030742	F:GTP-dependent_protein_binding	4	0.544577	Transcript_017876;Transcript_165340;Transcript_173643;Transcript_234826
GO:1901970	P:positive_regulation_of_mitotic_sister_chromatid_separation	2	1	Transcript_231717;Transcript_242034
GO:0043495	F:protein_anchor	4	0.676899	Transcript_047963;Transcript_048938;Transcript_133277;Transcript_243539
GO:0042623	F:ATPase_activity,_coupled	6	0.332244	Transcript_011795;Transcript_043277;Transcript_047488;Transcript_128685;Transcript_149065;Transcript_233721
GO:0002862	P:negative_regulation_of_inflammatory_response_to_antigenic_stimulus	2	1	Transcript_006763;Transcript_056267
ko04750	Inflammatory_mediator_regulation_of_TRP_channels	10	0.0896971	Transcript_007158;Transcript_013342;Transcript_018125;Transcript_025199;Transcript_032232;Transcript_107816;Transcript_227920;Transcript_228108;Transcript_233608;Transcript_239079
GO:0010088	P:phloem_development	6	0.716775	Transcript_027410;Transcript_076552;Transcript_140564;Transcript_181199;Transcript_185119;Transcript_209443
GO:0044206	P:UMP_salvage	7	0.0603279	Transcript_015835;Transcript_045848;Transcript_103996;Transcript_160540;Transcript_224695;Transcript_234731;Transcript_236265
GO:0006544	P:glycine_metabolic_process	5	0.00453005	Transcript_028630;Transcript_073685;Transcript_195239;Transcript_206305;Transcript_241912
GO:0045170	C:spectrosome	2	0.281171	Transcript_026391;Transcript_151249
GO:0000186	P:activation_of_MAPKK_activity	9	0.0323004	Transcript_006747;Transcript_017841;Transcript_022653;Transcript_027827;Transcript_029225;Transcript_080417;Transcript_145272;Transcript_225563;Transcript_243228
GO:0006353	P:DNA-templated_transcription,_termination	3	0.0321879	Transcript_000262;Transcript_101603;Transcript_209502
GO:0006813	P:potassium_ion_transport	21	0.0300165	Transcript_004502;Transcript_006710;Transcript_009328;Transcript_022252;Transcript_023384;Transcript_024602;Transcript_025479;Transcript_042034;Transcript_073744;Transcript_120987;Transcript_131595;Transcript_155522;Transcript_211469;Transcript_213817;Transcript_217335;Transcript_223044;Transcript_230317;Transcript_235656;Transcript_239515;Transcript_242880;Transcript_244861
GO:0004121	F:cystathionine_beta-lyase_activity	3	0.7609	Transcript_079697;Transcript_118468;Transcript_150519
GO:0004040	F:amidase_activity	4	1	Transcript_008582;Transcript_110067;Transcript_235022;Transcript_243605
GO:0009816	P:defense_response_to_bacterium,_incompatible_interaction	24	0.00598902	Transcript_002509;Transcript_007081;Transcript_010355;Transcript_013533;Transcript_014432;Transcript_017369;Transcript_021463;Transcript_027278;Transcript_034582;Transcript_034675;Transcript_055058;Transcript_087235;Transcript_095376;Transcript_098400;Transcript_106321;Transcript_179800;Transcript_197004;Transcript_199534;Transcript_200079;Transcript_222961;Transcript_226955;Transcript_233846;Tra…
GO:0006103	P:2-oxoglutarate_metabolic_process	6	0.213234	Transcript_031854;Transcript_034831;Transcript_042399;Transcript_043070;Transcript_203816;Transcript_222132
GO:0009228	P:thiamine_biosynthetic_process	12	0.0494269	Transcript_015169;Transcript_026947;Transcript_037319;Transcript_048064;Transcript_069394;Transcript_072950;Transcript_176458;Transcript_203566;Transcript_226851;Transcript_231879;Transcript_243474;Transcript_244605
GO:0015203	F:polyamine_transmembrane_transporter_activity	2	0.595334	Transcript_225028;Transcript_243863
GO:0052542	P:defense_response_by_callose_deposition	4	1	Transcript_043940;Transcript_167861;Transcript_173310;Transcript_228869
GO:0052594	F:aminoacetone:oxygen_oxidoreductase(deaminating)_activity	4	0.211787	Transcript_007347;Transcript_158955;Transcript_195860;Transcript_222613
GO:0004601	F:peroxidase_activity	33	3.25097e-05	Transcript_005848;Transcript_015066;Transcript_016332;Transcript_018255;Transcript_026746;Transcript_029297;Transcript_034461;Transcript_049600;Transcript_050169;Transcript_060152;Transcript_084515;Transcript_095323;Transcript_105073;Transcript_111143;Transcript_120512;Transcript_121969;Transcript_130237;Transcript_135597;Transcript_142015;Transcript_142932;Transcript_150483;Transcript_170181;Tra…
GO:0050680	P:negative_regulation_of_epithelial_cell_proliferation	3	0.25427	Transcript_014861;Transcript_094552;Transcript_240915
GO:0005938	C:cell_cortex_	16	0.00778743	Transcript_011795;Transcript_024871;Transcript_026391;Transcript_043277;Transcript_044305;Transcript_096671;Transcript_103207;Transcript_152417;Transcript_191113;Transcript_199789;Transcript_222062;Transcript_233721;Transcript_234710;Transcript_236936;Transcript_241049;Transcript_243228
GO:0030877	C:beta-catenin_destruction_complex_	2	0.695033	Transcript_166714;Transcript_172586
GO:0008344	P:adult_locomotory_behavior	6	0.498222	Transcript_007576;Transcript_062378;Transcript_098359;Transcript_202986;Transcript_237905;Transcript_242917
GO:0016628	F:oxidoreductase_activity,_acting_on_the_CH-CH_group_of_donors,_NAD_or_NADP_as_acceptor	3	0.303101	Transcript_004127;Transcript_009009;Transcript_078941
GO:0045807	P:positive_regulation_of_endocytosis	3	0.506334	Transcript_225466;Transcript_238423;Transcript_240915
GO:0000104	F:succinate_dehydrogenase_activity	8	1	Transcript_078929;Transcript_143477;Transcript_166507;Transcript_168585;Transcript_193240;Transcript_223224;Transcript_227997;Transcript_230646
GO:0047938	F:glucose-6-phosphate_1-epimerase_activity	6	0.404187	Transcript_010174;Transcript_073093;Transcript_093157;Transcript_153262;Transcript_227624;Transcript_243414
GO:0046786	P:viral_replication_complex_formation_and_maintenance	5	0.118091	Transcript_011491;Transcript_017678;Transcript_019131;Transcript_239232;Transcript_240509
GO:0010172	P:embryonic_body_morphogenesis	3	1	Transcript_078881;Transcript_172050;Transcript_175896
GO:0007281	P:germ_cell_development	5	0.189325	Transcript_103493;Transcript_172050;Transcript_175896;Transcript_232706;Transcript_234243
GO:0018023	P:peptidyl-lysine_trimethylation	3	0.393222	Transcript_006791;Transcript_009114;Transcript_113936
GO:0050708	P:regulation_of_protein_secretion	2	0.776635	Transcript_064683;Transcript_153986
GO:0006807	P:nitrogen_compound_metabolic_process	9	0.152637	Transcript_003076;Transcript_018160;Transcript_021238;Transcript_034831;Transcript_043887;Transcript_082227;Transcript_213562;Transcript_215505;Transcript_232338
GO:0003978	F:UDP-glucose_4-epimerase_activity	4	0.032216	Transcript_129362;Transcript_229272;Transcript_232274;Transcript_232368
GO:0019243	P:methylglyoxal_catabolic_process_to_D-lactate	4	0.676899	Transcript_096846;Transcript_167861;Transcript_172472;Transcript_202974
GO:0006968	P:cellular_defense_response	4	0.783799	Transcript_004742;Transcript_018183;Transcript_149716;Transcript_163621
GO:0033110	C:Cvt_vesicle_membrane	4	0.0567059	Transcript_059638;Transcript_104899;Transcript_186342;Transcript_235438
GO:0005794	C:Golgi_apparatus	403	2.86291e-55	Transcript_000081;Transcript_001104;Transcript_001319;Transcript_001808;Transcript_002026;Transcript_002893;Transcript_004453;Transcript_005015;Transcript_005595;Transcript_005880;Transcript_006193;Transcript_006266;Transcript_006790;Transcript_007264;Transcript_007379;Transcript_008292;Transcript_008375;Transcript_008404;Transcript_008667;Transcript_009242;Transcript_009549;Transcript_009608;Tra…
GO:0070417	P:cellular_response_to_cold	9	0.00589778	Transcript_042489;Transcript_053463;Transcript_087023;Transcript_120078;Transcript_170021;Transcript_174797;Transcript_178079;Transcript_185073;Transcript_229936
GO:0001558	P:regulation_of_cell_growth	10	0.414092	Transcript_009156;Transcript_019653;Transcript_062313;Transcript_117716;Transcript_140909;Transcript_183073;Transcript_225466;Transcript_231660;Transcript_232883;Transcript_241004
GO:0007286	P:spermatid_development	6	0.716775	Transcript_002006;Transcript_011795;Transcript_047488;Transcript_091210;Transcript_152576;Transcript_182662
GO:0048527	P:lateral_root_development	11	0.0180123	Transcript_019242;Transcript_038402;Transcript_124083;Transcript_151890;Transcript_165502;Transcript_186151;Transcript_207229;Transcript_209211;Transcript_223793;Transcript_226818;Transcript_235630
GO:0003986	F:acetyl-CoA_hydrolase_activity	2	0.406345	Transcript_162335;Transcript_236138
GO:0008360	P:regulation_of_cell_shape	32	1.18237e-06	Transcript_006433;Transcript_009482;Transcript_009791;Transcript_012099;Transcript_017238;Transcript_026391;Transcript_037895;Transcript_042002;Transcript_043323;Transcript_043940;Transcript_044689;Transcript_048034;Transcript_062213;Transcript_062378;Transcript_063946;Transcript_081735;Transcript_093147;Transcript_116767;Transcript_149561;Transcript_152417;Transcript_155810;Transcript_194193;Tra…
GO:0009697	P:salicylic_acid_biosynthetic_process	6	0.134191	Transcript_005159;Transcript_130283;Transcript_173676;Transcript_206305;Transcript_225061;Transcript_230080
GO:0046718	P:viral_entry_into_host_cell	2	0.190669	Transcript_186430;Transcript_239058
GO:0016709	F:oxidoreductase_activity,_acting_on_paired_donors,_with_incorporation_or_reduction_of_molecular_oxygen,_NAD(P)H_as_one_donor,_and_incorporation_of_one_atom_of_oxygen	9	3.48826e-05	Transcript_006234;Transcript_028541;Transcript_034422;Transcript_071080;Transcript_114216;Transcript_213069;Transcript_228489;Transcript_229970;Transcript_239945
GO:0051512	P:positive_regulation_of_unidimensional_cell_growth	3	0.805419	Transcript_042637;Transcript_085304;Transcript_105037
GO:0071044	P:histone_mRNA_catabolic_process	2	1	Transcript_161484;Transcript_233899
GO:0019684	P:photosynthesis,_light_reaction	10	0.768731	Transcript_023850;Transcript_050144;Transcript_130283;Transcript_152628;Transcript_170085;Transcript_206305;Transcript_225061;Transcript_230080;Transcript_238725;Transcript_240886
GO:0010040	P:response_to_iron(II)_ion	2	0.281171	Transcript_139088;Transcript_222995
GO:0031047	P:gene_silencing_by_RNA	30	1.27723e-05	Transcript_007955;Transcript_013159;Transcript_013764;Transcript_015894;Transcript_016284;Transcript_019157;Transcript_023322;Transcript_027294;Transcript_028771;Transcript_048515;Transcript_049728;Transcript_059526;Transcript_065204;Transcript_078006;Transcript_096051;Transcript_133459;Transcript_159985;Transcript_162898;Transcript_163678;Transcript_165311;Transcript_177018;Transcript_179189;Tra…
GO:0009647	P:skotomorphogenesis	4	0.825415	Transcript_043839;Transcript_201417;Transcript_225342;Transcript_239284
GO:0045252	C:oxoglutarate_dehydrogenase_complex	5	0.118091	Transcript_053448;Transcript_085286;Transcript_097665;Transcript_185618;Transcript_223367
GO:0032781	P:positive_regulation_of_ATPase_activity	4	0.783799	Transcript_037574;Transcript_043364;Transcript_186313;Transcript_240246
GO:0006885	P:regulation_of_pH	9	0.0648237	Transcript_015622;Transcript_017027;Transcript_022252;Transcript_023384;Transcript_024602;Transcript_131595;Transcript_184704;Transcript_241768;Transcript_244861
GO:0070628	F:proteasome_binding	4	0.0250591	Transcript_043987;Transcript_052040;Transcript_229571;Transcript_237091
GO:0001825	P:blastocyst_formation	2	1	Transcript_221863;Transcript_228725
GO:0009407	P:toxin_catabolic_process	8	0.171634	Transcript_009143;Transcript_011203;Transcript_045584;Transcript_062429;Transcript_168471;Transcript_209211;Transcript_226159;Transcript_244736
GO:0016331	P:morphogenesis_of_embryonic_epithelium	2	0.695033	Transcript_157809;Transcript_229953
GO:0004591	F:oxoglutarate_dehydrogenase_(succinyl-transferring)_activity	3	0.805419	Transcript_053448;Transcript_097665;Transcript_203816
GO:0016740	F:transferase_activity	30	0.0125212	Transcript_004077;Transcript_014948;Transcript_016059;Transcript_017374;Transcript_019427;Transcript_024375;Transcript_024829;Transcript_028663;Transcript_034014;Transcript_041858;Transcript_044119;Transcript_084524;Transcript_086679;Transcript_095376;Transcript_110866;Transcript_125614;Transcript_147681;Transcript_159610;Transcript_184641;Transcript_184935;Transcript_194040;Transcript_194914;Tra…
ko04920	Adipocytokine_signaling_pathway	18	0.00117248	Transcript_001724;Transcript_009590;Transcript_027403;Transcript_028277;Transcript_038714;Transcript_045110;Transcript_112171;Transcript_123465;Transcript_155690;Transcript_172327;Transcript_175722;Transcript_177792;Transcript_201604;Transcript_205700;Transcript_225466;Transcript_236082;Transcript_241640;Transcript_243916
GO:0005677	C:chromatin_silencing_complex_	2	0.0431288	Transcript_107774;Transcript_238122
GO:0016036	P:cellular_response_to_phosphate_starvation	24	4.28404e-05	Transcript_002893;Transcript_003093;Transcript_004695;Transcript_008667;Transcript_014548;Transcript_018246;Transcript_028368;Transcript_037769;Transcript_043811;Transcript_056996;Transcript_057533;Transcript_123438;Transcript_160099;Transcript_172102;Transcript_174837;Transcript_210800;Transcript_222257;Transcript_228172;Transcript_229675;Transcript_230686;Transcript_232675;Transcript_237619;Tra…
GO:0004652	F:polynucleotide_adenylyltransferase_activity	8	0.747417	Transcript_005483;Transcript_019944;Transcript_020625;Transcript_024280;Transcript_124077;Transcript_222440;Transcript_224551;Transcript_233899
GO:0009579	C:thylakoid	66	3.48326e-10	Transcript_009143;Transcript_011203;Transcript_014604;Transcript_015850;Transcript_017330;Transcript_020649;Transcript_022259;Transcript_025733;Transcript_026341;Transcript_026691;Transcript_034467;Transcript_041759;Transcript_041863;Transcript_042121;Transcript_042555;Transcript_042714;Transcript_042783;Transcript_045584;Transcript_048031;Transcript_049934;Transcript_051541;Transcript_051711;Tra…
GO:0008301	F:DNA_binding,_bending	3	1	Transcript_016940;Transcript_043166;Transcript_236631
GO:0016630	F:protochlorophyllide_reductase_activity	4	1	Transcript_090057;Transcript_168145;Transcript_238915;Transcript_242324
GO:0030048	P:actin_filament-based_movement	10	0.0153003	Transcript_011795;Transcript_016264;Transcript_141844;Transcript_153958;Transcript_170498;Transcript_188312;Transcript_189285;Transcript_223009;Transcript_238113;Transcript_241752
GO:0005655	C:nucleolar_ribonuclease_P_complex_	2	0.190669	Transcript_015894;Transcript_159985
GO:0001072	F:RNA_binding_transcription_antitermination_factor_activity	2	0.776635	Transcript_225772;Transcript_240207
GO:0055091	P:phospholipid_homeostasis	3	1	Transcript_012922;Transcript_208944;Transcript_227282
GO:0004849	F:uridine_kinase_activity	5	0.09118	Transcript_015835;Transcript_045848;Transcript_103996;Transcript_160540;Transcript_236265
GO:0000146	F:microfilament_motor_activity	2	1	Transcript_011795;Transcript_241752
GO:0004452	F:isopentenyl-diphosphate_delta-isomerase_activity	2	0.456579	Transcript_229806;Transcript_234893
GO:0080073	F:spermidine:coumaroyl_CoA_N-acyltransferase_activity	9	0.442827	Transcript_006017;Transcript_017645;Transcript_057799;Transcript_078594;Transcript_100864;Transcript_169290;Transcript_220227;Transcript_233355;Transcript_243266
GO:0055114	P:oxidation-reduction_process	89	2.6782e-16	Transcript_002210;Transcript_002827;Transcript_005669;Transcript_005814;Transcript_009683;Transcript_014604;Transcript_020239;Transcript_020481;Transcript_023799;Transcript_025583;Transcript_025620;Transcript_026133;Transcript_028059;Transcript_030430;Transcript_030537;Transcript_033053;Transcript_038520;Transcript_039086;Transcript_040280;Transcript_041922;Transcript_042617;Transcript_043638;Tra…
GO:0006307	P:DNA_dealkylation_involved_in_DNA_repair	2	0.343054	Transcript_012325;Transcript_237865
GO:0006048	P:UDP-N-acetylglucosamine_biosynthetic_process	2	0.0431288	Transcript_190643;Transcript_244651
GO:0004441	F:inositol-1,4-bisphosphate_1-phosphatase_activity	3	1	Transcript_028100;Transcript_099453;Transcript_183950
GO:0046688	P:response_to_copper_ion	4	0.27286	Transcript_035581;Transcript_214295;Transcript_226151;Transcript_233514
GO:0051895	P:negative_regulation_of_focal_adhesion_assembly	3	0.303101	Transcript_004615;Transcript_035784;Transcript_112814
GO:0000210	F:NAD+_diphosphatase_activity	6	0.134191	Transcript_022935;Transcript_111675;Transcript_229547;Transcript_232603;Transcript_241503;Transcript_243343
GO:0032210	P:regulation_of_telomere_maintenance_via_telomerase	2	0.154885	Transcript_030389;Transcript_230188
GO:0090627	P:plant_epidermal_cell_differentiation	2	0.281171	Transcript_015884;Transcript_171924
GO:0043916	F:DNA-7-methylguanine_glycosylase_activity	3	1	Transcript_012325;Transcript_167757;Transcript_237865
GO:0042773	P:ATP_synthesis_coupled_electron_transport	9	0.0813778	Transcript_015462;Transcript_018207;Transcript_044798;Transcript_061624;Transcript_098341;Transcript_157242;Transcript_170085;Transcript_230793;Transcript_240886
GO:0046331	P:lateral_inhibition	8	0.868251	Transcript_009645;Transcript_042963;Transcript_062313;Transcript_080504;Transcript_098359;Transcript_180084;Transcript_188455;Transcript_228003
GO:0045324	P:late_endosome_to_vacuole_transport	3	0.0435642	Transcript_096106;Transcript_168419;Transcript_231906
GO:0004004	F:ATP-dependent_RNA_helicase_activity	24	8.12442e-06	Transcript_012262;Transcript_013941;Transcript_017203;Transcript_021722;Transcript_030389;Transcript_046685;Transcript_068956;Transcript_084855;Transcript_096223;Transcript_152379;Transcript_153215;Transcript_163621;Transcript_172050;Transcript_172591;Transcript_175896;Transcript_199136;Transcript_202974;Transcript_227128;Transcript_230188;Transcript_232525;Transcript_235090;Transcript_238865;Tra…
GO:0008962	F:phosphatidylglycerophosphatase_activity	4	0.825415	Transcript_027976;Transcript_029289;Transcript_232439;Transcript_239699
GO:0010082	P:regulation_of_root_meristem_growth	4	0.342182	Transcript_043056;Transcript_057067;Transcript_117469;Transcript_180054
GO:0008893	F:guanosine-3',5'-bis(diphosphate)_3'-diphosphatase_activity	7	0.73338	Transcript_009673;Transcript_042217;Transcript_149380;Transcript_171680;Transcript_243113;Transcript_243343;Transcript_244488
GO:0006637	P:acyl-CoA_metabolic_process	3	1	Transcript_038714;Transcript_162335;Transcript_236138
ko04013	MAPK_signaling_pathway_-_fly	38	4.69199e-07	Transcript_002482;Transcript_007619;Transcript_008818;Transcript_011250;Transcript_015523;Transcript_021853;Transcript_022674;Transcript_024575;Transcript_025844;Transcript_026338;Transcript_029089;Transcript_030322;Transcript_033023;Transcript_034734;Transcript_043118;Transcript_044543;Transcript_049471;Transcript_051200;Transcript_058863;Transcript_072106;Transcript_118184;Transcript_118410;Tra…
GO:0010440	P:stomatal_lineage_progression	5	0.240732	Transcript_005533;Transcript_093975;Transcript_143778;Transcript_191541;Transcript_222679
GO:0019904	F:protein_domain_specific_binding	2	0.00042205	Transcript_013502;Transcript_243895
ko04080	Neuroactive_ligand-receptor_interaction	3	0.527991	Transcript_004696;Transcript_087523;Transcript_222179
GO:0050662	F:coenzyme_binding	41	1.49431e-06	Transcript_002504;Transcript_005369;Transcript_013377;Transcript_017551;Transcript_024622;Transcript_030150;Transcript_032996;Transcript_039938;Transcript_039962;Transcript_040651;Transcript_042600;Transcript_044948;Transcript_054733;Transcript_065775;Transcript_074488;Transcript_107326;Transcript_115169;Transcript_123629;Transcript_129362;Transcript_144405;Transcript_146059;Transcript_151232;Tra…
ko04611	Platelet_activation	14	0.0271158	Transcript_007158;Transcript_009220;Transcript_013342;Transcript_025199;Transcript_031338;Transcript_032232;Transcript_072106;Transcript_107816;Transcript_223900;Transcript_227920;Transcript_228108;Transcript_230696;Transcript_233608;Transcript_239079
GO:2000022	P:regulation_of_jasmonic_acid_mediated_signaling_pathway	7	0.357197	Transcript_014728;Transcript_022180;Transcript_095376;Transcript_157816;Transcript_191377;Transcript_231454;Transcript_241454
GO:0006231	P:dTMP_biosynthetic_process	2	0.456579	Transcript_035914;Transcript_057252
GO:0018105	P:peptidyl-serine_phosphorylation	25	9.50972e-08	Transcript_009893;Transcript_015977;Transcript_020078;Transcript_022223;Transcript_028717;Transcript_043131;Transcript_043323;Transcript_081735;Transcript_083080;Transcript_094076;Transcript_156445;Transcript_164812;Transcript_172586;Transcript_176527;Transcript_199149;Transcript_201137;Transcript_202384;Transcript_220376;Transcript_222252;Transcript_224521;Transcript_228348;Transcript_233768;Tra…
GO:0019203	F:carbohydrate_phosphatase_activity	5	1	Transcript_032156;Transcript_095400;Transcript_154120;Transcript_156316;Transcript_214445
GO:0030527	F:structural_constituent_of_chromatin	3	0.506334	Transcript_020397;Transcript_188449;Transcript_198157
GO:0031977	C:thylakoid_lumen	21	0.00520126	Transcript_011737;Transcript_026341;Transcript_033093;Transcript_042121;Transcript_049934;Transcript_051541;Transcript_051711;Transcript_084874;Transcript_134617;Transcript_137483;Transcript_152999;Transcript_191020;Transcript_201021;Transcript_217324;Transcript_222876;Transcript_222934;Transcript_223572;Transcript_234737;Transcript_235995;Transcript_240003;Transcript_243223
GO:0005353	F:fructose_transmembrane_transporter_activity	2	0.154885	Transcript_150379;Transcript_231756
GO:0007163	P:establishment_or_maintenance_of_cell_polarity	6	0.169485	Transcript_004518;Transcript_012058;Transcript_194155;Transcript_226693;Transcript_230367;Transcript_232000
GO:0071992	F:phytochelatin_transmembrane_transporter_activity	2	0.281171	Transcript_007741;Transcript_106913
GO:0003883	F:CTP_synthase_activity	2	0.776635	Transcript_230725;Transcript_235526
GO:0009535	C:chloroplast_thylakoid_membrane	166	2.45601e-25	Transcript_001398;Transcript_001458;Transcript_001527;Transcript_001984;Transcript_003002;Transcript_005090;Transcript_005159;Transcript_005880;Transcript_005893;Transcript_009353;Transcript_012201;Transcript_014043;Transcript_014604;Transcript_015999;Transcript_016091;Transcript_016421;Transcript_017330;Transcript_017733;Transcript_017903;Transcript_023850;Transcript_023909;Transcript_025921;Tra…
GO:0007346	P:regulation_of_mitotic_cell_cycle	12	0.00198154	Transcript_005825;Transcript_006747;Transcript_017841;Transcript_022653;Transcript_026483;Transcript_027827;Transcript_152417;Transcript_155446;Transcript_225563;Transcript_227832;Transcript_239898;Transcript_243228
GO:0006260	P:DNA_replication	44	8.88532e-08	Transcript_000710;Transcript_003587;Transcript_004468;Transcript_005072;Transcript_007367;Transcript_015354;Transcript_017900;Transcript_025106;Transcript_026221;Transcript_033085;Transcript_040432;Transcript_042489;Transcript_043877;Transcript_053365;Transcript_057808;Transcript_087023;Transcript_110057;Transcript_119105;Transcript_133959;Transcript_144160;Transcript_155807;Transcript_169543;Tra…
GO:0033384	P:geranyl_diphosphate_biosynthetic_process	5	0.304333	Transcript_023190;Transcript_047414;Transcript_138015;Transcript_195482;Transcript_213310
GO:0010271	P:regulation_of_chlorophyll_catabolic_process	5	0.115629	Transcript_067031;Transcript_157183;Transcript_227862;Transcript_231787;Transcript_242956
GO:0009736	P:cytokinin-activated_signaling_pathway	17	0.000115427	Transcript_001411;Transcript_011067;Transcript_013227;Transcript_017560;Transcript_019565;Transcript_031083;Transcript_035290;Transcript_043839;Transcript_057067;Transcript_117469;Transcript_132647;Transcript_201417;Transcript_225342;Transcript_232124;Transcript_234528;Transcript_238765;Transcript_243083
GO:0000177	C:cytoplasmic_exosome_(RNase_complex)_	3	0.232394	Transcript_009427;Transcript_043875;Transcript_222553
GO:0061711	F:N(6)-L-threonylcarbamoyladenine_synthase	5	0.212117	Transcript_004531;Transcript_013245;Transcript_138273;Transcript_189717;Transcript_242469
GO:0008131	F:primary_amine_oxidase_activity	4	0.0750029	Transcript_007347;Transcript_158955;Transcript_195860;Transcript_222613
GO:0007275	P:multicellular_organismal_development	134	1.38603e-12	Transcript_000274;Transcript_003477;Transcript_004543;Transcript_005212;Transcript_007619;Transcript_007873;Transcript_008338;Transcript_008419;Transcript_008468;Transcript_010727;Transcript_011067;Transcript_012289;Transcript_012603;Transcript_012819;Transcript_013223;Transcript_013502;Transcript_015116;Transcript_015523;Transcript_015917;Transcript_016488;Transcript_017580;Transcript_018551;Tra…
ko00512	Mucin_type_O-Glycan_biosynthesis	2	0.406345	Transcript_227030;Transcript_232031
GO:0019843	F:rRNA_binding	73	3.77768e-14	Transcript_000373;Transcript_000399;Transcript_002363;Transcript_002658;Transcript_007649;Transcript_012128;Transcript_012657;Transcript_014879;Transcript_014948;Transcript_015293;Transcript_015650;Transcript_016218;Transcript_016437;Transcript_019856;Transcript_021548;Transcript_021575;Transcript_022320;Transcript_023437;Transcript_025366;Transcript_026269;Transcript_026937;Transcript_028181;Tra…
GO:0018279	P:protein_N-linked_glycosylation_via_asparagine	14	0.153471	Transcript_001072;Transcript_023970;Transcript_031084;Transcript_044030;Transcript_082760;Transcript_091788;Transcript_133277;Transcript_137297;Transcript_164438;Transcript_170938;Transcript_224464;Transcript_234154;Transcript_235176;Transcript_243895
GO:0016788	F:hydrolase_activity,_acting_on_ester_bonds	35	0.000183647	Transcript_005890;Transcript_011639;Transcript_016943;Transcript_019393;Transcript_024035;Transcript_025001;Transcript_031734;Transcript_033032;Transcript_042373;Transcript_070166;Transcript_097442;Transcript_130082;Transcript_131974;Transcript_160759;Transcript_167005;Transcript_184533;Transcript_188082;Transcript_195548;Transcript_195839;Transcript_211431;Transcript_213381;Transcript_218059;Tra…
GO:0050793	P:regulation_of_developmental_process	2	0.0431288	Transcript_028353;Transcript_033252
ko04810	Regulation_of_actin_cytoskeleton	51	2.87926e-05	Transcript_005372;Transcript_006418;Transcript_007158;Transcript_008140;Transcript_009220;Transcript_013342;Transcript_017414;Transcript_019534;Transcript_021853;Transcript_024575;Transcript_025199;Transcript_026710;Transcript_027651;Transcript_032232;Transcript_033023;Transcript_042004;Transcript_043118;Transcript_058863;Transcript_072106;Transcript_075635;Transcript_088132;Transcript_090276;Tra…
GO:0022008	P:neurogenesis	19	0.00013582	Transcript_023930;Transcript_037574;Transcript_042560;Transcript_043981;Transcript_062313;Transcript_103493;Transcript_140909;Transcript_149814;Transcript_151127;Transcript_210991;Transcript_213037;Transcript_227617;Transcript_230239;Transcript_232706;Transcript_234243;Transcript_234404;Transcript_234439;Transcript_236619;Transcript_239634
GO:0048280	P:vesicle_fusion_with_Golgi_apparatus	10	0.0896971	Transcript_008375;Transcript_033802;Transcript_039015;Transcript_127350;Transcript_158918;Transcript_161644;Transcript_227642;Transcript_236592;Transcript_238501;Transcript_240790
GO:0006909	P:phagocytosis	18	0.0696467	Transcript_000897;Transcript_002006;Transcript_009163;Transcript_009220;Transcript_015835;Transcript_092407;Transcript_152779;Transcript_155059;Transcript_156448;Transcript_160540;Transcript_170217;Transcript_182662;Transcript_197105;Transcript_210991;Transcript_211637;Transcript_222062;Transcript_229224;Transcript_235721
GO:0019776	F:Atg8_ligase_activity	4	0.825415	Transcript_104899;Transcript_181040;Transcript_186342;Transcript_224639
GO:0008069	P:dorsal/ventral_axis_specification,_ovarian_follicular_epithelium	2	1	Transcript_180291;Transcript_232658
GO:0000500	C:RNA_polymerase_I_upstream_activating_factor_complex	2	0.695033	Transcript_042172;Transcript_140236
GO:0010484	F:H3_histone_acetyltransferase_activity	3	0.7609	Transcript_095035;Transcript_127616;Transcript_230754
GO:0005347	F:ATP_transmembrane_transporter_activity	2	0.0116077	Transcript_017733;Transcript_235812
GO:0005791	C:rough_endoplasmic_reticulum	5	0.840345	Transcript_002621;Transcript_019653;Transcript_034157;Transcript_041161;Transcript_137357
GO:0004673	F:protein_histidine_kinase_activity	4	0.163503	Transcript_146450;Transcript_158984;Transcript_164557;Transcript_238765
GO:0071732	P:cellular_response_to_nitric_oxide	2	1	Transcript_002522;Transcript_122730
GO:0005753	C:mitochondrial_proton-transporting_ATP_synthase_complex	6	0.0652015	Transcript_012761;Transcript_141694;Transcript_207464;Transcript_211637;Transcript_228174;Transcript_237336
GO:0008173	F:RNA_methyltransferase_activity	2	0.776635	Transcript_011476;Transcript_244643
GO:0046283	P:anthocyanin-containing_compound_metabolic_process	5	0.820517	Transcript_123017;Transcript_188483;Transcript_233547;Transcript_239284;Transcript_239647
GO:0008217	P:regulation_of_blood_pressure	8	0.283931	Transcript_003866;Transcript_098425;Transcript_120546;Transcript_155875;Transcript_230437;Transcript_231033;Transcript_231455;Transcript_233435
GO:0010265	P:SCF_complex_assembly	2	1	Transcript_231828;Transcript_233696
GO:0006783	P:heme_biosynthetic_process	8	0.168987	Transcript_007658;Transcript_007719;Transcript_030702;Transcript_087523;Transcript_167861;Transcript_177693;Transcript_229809;Transcript_243539
GO:0030620	F:U2_snRNA_binding	6	0.596737	Transcript_011217;Transcript_043873;Transcript_187896;Transcript_206492;Transcript_227922;Transcript_229688
GO:0048864	P:stem_cell_development	4	0.671724	Transcript_075492;Transcript_153368;Transcript_243141;Transcript_243207
GO:0010204	P:defense_response_signaling_pathway,_resistance_gene-independent	3	0.0588541	Transcript_098966;Transcript_192336;Transcript_239647
GO:0051289	P:protein_homotetramerization	10	0.243054	Transcript_008093;Transcript_025701;Transcript_034157;Transcript_141192;Transcript_145207;Transcript_155159;Transcript_181901;Transcript_225231;Transcript_238759;Transcript_240065
GO:0017056	F:structural_constituent_of_nuclear_pore	2	1	Transcript_054999;Transcript_241241
GO:0006406	P:mRNA_export_from_nucleus	8	0.000310065	Transcript_002482;Transcript_149744;Transcript_180291;Transcript_227860;Transcript_232658;Transcript_236051;Transcript_241984;Transcript_244041
GO:0015088	F:copper_uptake_transmembrane_transporter_activity	3	0.527991	Transcript_191510;Transcript_202786;Transcript_236960
GO:0046085	P:adenosine_metabolic_process	2	1	Transcript_061836;Transcript_229920
GO:0003997	F:acyl-CoA_oxidase_activity	6	0.837471	Transcript_018364;Transcript_032053;Transcript_053296;Transcript_192035;Transcript_234669;Transcript_242645
GO:0004392	F:heme_oxygenase_(decyclizing)_activity	4	0.367155	Transcript_078683;Transcript_087500;Transcript_203622;Transcript_214489
GO:0005200	F:structural_constituent_of_cytoskeleton	27	1.50064e-05	Transcript_003467;Transcript_004764;Transcript_009199;Transcript_009220;Transcript_016295;Transcript_022444;Transcript_026055;Transcript_028411;Transcript_034593;Transcript_043075;Transcript_044045;Transcript_055843;Transcript_059877;Transcript_115850;Transcript_122808;Transcript_151249;Transcript_168236;Transcript_168622;Transcript_192371;Transcript_195755;Transcript_196330;Transcript_197714;Tra…
GO:0004385	F:guanylate_kinase_activity	2	0.190669	Transcript_006160;Transcript_198468
GO:0040024	P:dauer_larval_development	2	0.695033	Transcript_019663;Transcript_049824
GO:0007032	P:endosome_organization	3	0.0237529	Transcript_168419;Transcript_230064;Transcript_233779
GO:0070374	P:positive_regulation_of_ERK1_and_ERK2_cascade	6	0.658521	Transcript_008962;Transcript_021722;Transcript_044013;Transcript_186849;Transcript_226420;Transcript_226819
GO:0010150	P:leaf_senescence	40	2.04052e-05	Transcript_001411;Transcript_013227;Transcript_015989;Transcript_016018;Transcript_017301;Transcript_018122;Transcript_020233;Transcript_026335;Transcript_031485;Transcript_034675;Transcript_035793;Transcript_036070;Transcript_043940;Transcript_052661;Transcript_085215;Transcript_095376;Transcript_117669;Transcript_118791;Transcript_132647;Transcript_138634;Transcript_139997;Transcript_147868;Tra…
GO:0006289	P:nucleotide-excision_repair	13	0.000548642	Transcript_026538;Transcript_043987;Transcript_052040;Transcript_117629;Transcript_142487;Transcript_171266;Transcript_197824;Transcript_221864;Transcript_229571;Transcript_230654;Transcript_231438;Transcript_237091;Transcript_240646
GO:0002181	P:cytoplasmic_translation	9	0.0648237	Transcript_004748;Transcript_044835;Transcript_045976;Transcript_117240;Transcript_117491;Transcript_171390;Transcript_199870;Transcript_200889;Transcript_204786
GO:0005787	C:signal_peptidase_complex	7	0.235393	Transcript_009185;Transcript_098785;Transcript_111048;Transcript_171583;Transcript_171949;Transcript_183245;Transcript_194092
GO:0050464	F:nitrate_reductase_(NADPH)_activity	2	0.695033	Transcript_224732;Transcript_243855
GO:0009306	P:protein_secretion	15	0.000526939	Transcript_000897;Transcript_008169;Transcript_021496;Transcript_025324;Transcript_025510;Transcript_047240;Transcript_049761;Transcript_078372;Transcript_083792;Transcript_093222;Transcript_191930;Transcript_205405;Transcript_228071;Transcript_229747;Transcript_232209
GO:0090181	P:regulation_of_cholesterol_metabolic_process	8	0.283931	Transcript_003866;Transcript_098425;Transcript_100904;Transcript_120546;Transcript_155875;Transcript_231033;Transcript_231455;Transcript_233435
GO:0032454	F:histone_demethylase_activity_(H3-K9_specific)	2	1	Transcript_102631;Transcript_244601
GO:0017069	F:snRNA_binding	9	0.558452	Transcript_009274;Transcript_011350;Transcript_043889;Transcript_044901;Transcript_163414;Transcript_165606;Transcript_222818;Transcript_228259;Transcript_243940
GO:0006878	P:cellular_copper_ion_homeostasis	9	0.226243	Transcript_014827;Transcript_016059;Transcript_018449;Transcript_044119;Transcript_073903;Transcript_075479;Transcript_191510;Transcript_226089;Transcript_238031
ko04614	Renin-angiotensin_system	3	0.135649	Transcript_027402;Transcript_198586;Transcript_240329
GO:0007267	P:cell-cell_signaling	10	0.000963547	Transcript_000262;Transcript_000648;Transcript_021363;Transcript_023059;Transcript_042294;Transcript_111361;Transcript_147433;Transcript_151365;Transcript_177018;Transcript_227324
GO:0042546	P:cell_wall_biogenesis	18	0.000925735	Transcript_001808;Transcript_012139;Transcript_022755;Transcript_022940;Transcript_031473;Transcript_037091;Transcript_044605;Transcript_101298;Transcript_107630;Transcript_113189;Transcript_116289;Transcript_135210;Transcript_154111;Transcript_185437;Transcript_208814;Transcript_238561;Transcript_241622;Transcript_242133
GO:0004314	F:acyl-carrier-protein_S-malonyltransferase_activity	8	0.710609	Transcript_019427;Transcript_025262;Transcript_066148;Transcript_086679;Transcript_127755;Transcript_155023;Transcript_189857;Transcript_225185
GO:0008033	P:tRNA_processing	24	0.0734765	Transcript_004531;Transcript_008914;Transcript_013245;Transcript_018331;Transcript_020339;Transcript_021451;Transcript_042115;Transcript_043167;Transcript_043924;Transcript_077173;Transcript_138273;Transcript_141257;Transcript_189717;Transcript_203080;Transcript_205336;Transcript_206016;Transcript_207184;Transcript_222331;Transcript_226090;Transcript_237201;Transcript_238419;Transcript_238759;Tra…
GO:0098721	P:uracil_import_across_plasma_membrane	3	0.7609	Transcript_015491;Transcript_023143;Transcript_029355
GO:0048250	P:mitochondrial_iron_ion_transport	2	0.695033	Transcript_232445;Transcript_234009
GO:0016682	F:oxidoreductase_activity,_acting_on_diphenols_and_related_substances_as_donors,_oxygen_as_acceptor	5	0.46668	Transcript_036022;Transcript_165068;Transcript_232161;Transcript_243444;Transcript_243544
GO:0046983	F:protein_dimerization_activity	4	0.0989074	Transcript_003141;Transcript_010937;Transcript_012922;Transcript_204786
GO:0070676	P:intralumenal_vesicle_formation	5	0.118091	Transcript_025114;Transcript_089471;Transcript_197855;Transcript_199536;Transcript_205682
GO:0000062	F:fatty-acyl-CoA_binding	14	0.0265783	Transcript_018364;Transcript_028778;Transcript_046517;Transcript_053296;Transcript_063233;Transcript_159840;Transcript_160763;Transcript_164850;Transcript_190050;Transcript_192035;Transcript_232164;Transcript_234669;Transcript_240397;Transcript_242645
GO:0010234	P:anther_wall_tapetum_cell_fate_specification	3	0.639444	Transcript_016461;Transcript_189596;Transcript_199199
GO:0010501	P:RNA_secondary_structure_unwinding	15	1.46619e-05	Transcript_012262;Transcript_017203;Transcript_021722;Transcript_046685;Transcript_068956;Transcript_084855;Transcript_096223;Transcript_153215;Transcript_199136;Transcript_227128;Transcript_232525;Transcript_235090;Transcript_238865;Transcript_240874;Transcript_241984
GO:0097054	P:L-glutamate_biosynthetic_process	2	0.105779	Transcript_028047;Transcript_240144
GO:0019358	P:nicotinate_nucleotide_salvage	3	0.237067	Transcript_033039;Transcript_100250;Transcript_175678
GO:0016165	F:linoleate_13S-lipoxygenase_activity	3	0.506334	Transcript_034640;Transcript_041368;Transcript_231715
GO:0034243	P:regulation_of_transcription_elongation_from_RNA_polymerase_II_promoter	2	0.776635	Transcript_081091;Transcript_243813
GO:0004301	F:epoxide_hydrolase_activity	12	0.315088	Transcript_003866;Transcript_093421;Transcript_098425;Transcript_100904;Transcript_120546;Transcript_155875;Transcript_168146;Transcript_231033;Transcript_231455;Transcript_233435;Transcript_239360;Transcript_243110
GO:0006189	P:'de_novo'_IMP_biosynthetic_process	10	0.0189038	Transcript_004749;Transcript_010202;Transcript_011154;Transcript_017514;Transcript_033944;Transcript_042446;Transcript_138314;Transcript_201923;Transcript_209747;Transcript_235160
GO:0050992	P:dimethylallyl_diphosphate_biosynthetic_process	6	0.332244	Transcript_042987;Transcript_060657;Transcript_153355;Transcript_194521;Transcript_229806;Transcript_234893
GO:0001736	P:establishment_of_planar_polarity	5	0.46668	Transcript_001411;Transcript_013227;Transcript_132647;Transcript_155059;Transcript_233424
GO:0009968	P:negative_regulation_of_signal_transduction	4	1	Transcript_013885;Transcript_032009;Transcript_240826;Transcript_243877
GO:0008654	P:phospholipid_biosynthetic_process	20	0.00861919	Transcript_002537;Transcript_018042;Transcript_025795;Transcript_037769;Transcript_041729;Transcript_064505;Transcript_082038;Transcript_096195;Transcript_096284;Transcript_126207;Transcript_159104;Transcript_160087;Transcript_180880;Transcript_208944;Transcript_213137;Transcript_222668;Transcript_223515;Transcript_227282;Transcript_228854;Transcript_243697
GO:0004693	F:cyclin-dependent_protein_serine/threonine_kinase_activity	20	0.0401647	Transcript_000133;Transcript_000724;Transcript_004963;Transcript_028959;Transcript_032491;Transcript_034489;Transcript_037768;Transcript_042512;Transcript_042806;Transcript_045988;Transcript_136611;Transcript_180744;Transcript_192410;Transcript_205644;Transcript_224186;Transcript_224202;Transcript_228033;Transcript_233838;Transcript_234457;Transcript_241678
GO:0016485	P:protein_processing	14	0.000878127	Transcript_039672;Transcript_043609;Transcript_045132;Transcript_076030;Transcript_092321;Transcript_098076;Transcript_115691;Transcript_156977;Transcript_158348;Transcript_158550;Transcript_183007;Transcript_187570;Transcript_203855;Transcript_243127
GO:0045493	P:xylan_catabolic_process	5	0.189325	Transcript_019000;Transcript_024035;Transcript_029356;Transcript_047304;Transcript_096281
ko05014	Amyotrophic_lateral_sclerosis_(ALS)	24	0.0627703	Transcript_010012;Transcript_012094;Transcript_021853;Transcript_043118;Transcript_058863;Transcript_059039;Transcript_067992;Transcript_073903;Transcript_092873;Transcript_130631;Transcript_150338;Transcript_150886;Transcript_162158;Transcript_181292;Transcript_201233;Transcript_207470;Transcript_224126;Transcript_226089;Transcript_230020;Transcript_231953;Transcript_236061;Transcript_239220;Tra…
GO:0009873	P:ethylene-activated_signaling_pathway	74	5.11759e-10	Transcript_000274;Transcript_001411;Transcript_002815;Transcript_007195;Transcript_007992;Transcript_008169;Transcript_013227;Transcript_014548;Transcript_017317;Transcript_018430;Transcript_018996;Transcript_019960;Transcript_020405;Transcript_021496;Transcript_022136;Transcript_024829;Transcript_028584;Transcript_031083;Transcript_032858;Transcript_033642;Transcript_035826;Transcript_039868;Tra…
GO:0001944	P:vasculature_development	14	0.351315	Transcript_001411;Transcript_008282;Transcript_008347;Transcript_013227;Transcript_027935;Transcript_132647;Transcript_137939;Transcript_152924;Transcript_158984;Transcript_163320;Transcript_193866;Transcript_222612;Transcript_229020;Transcript_238306
GO:0000333	C:telomerase_catalytic_core_complex	2	0.281171	Transcript_044881;Transcript_233446
GO:0005720	C:nuclear_heterochromatin	5	1	Transcript_018951;Transcript_126726;Transcript_237879;Transcript_241343;Transcript_243218
GO:0007040	P:lysosome_organization	3	0.179749	Transcript_141494;Transcript_168419;Transcript_233779
GO:0003879	F:ATP_phosphoribosyltransferase_activity	3	1	Transcript_011114;Transcript_121446;Transcript_240620
GO:0009824	F:AMP_dimethylallyltransferase_activity	3	1	Transcript_039162;Transcript_124970;Transcript_239518
GO:0016573	P:histone_acetylation	10	0.110659	Transcript_032961;Transcript_095035;Transcript_098438;Transcript_118655;Transcript_127616;Transcript_179852;Transcript_231576;Transcript_242565;Transcript_244509;Transcript_244623
GO:0004842	F:ubiquitin-protein_transferase_activity	153	6.3098e-20	Transcript_000407;Transcript_005828;Transcript_006502;Transcript_007083;Transcript_007708;Transcript_007768;Transcript_008372;Transcript_008597;Transcript_009408;Transcript_009450;Transcript_012848;Transcript_013885;Transcript_014548;Transcript_014881;Transcript_014893;Transcript_015523;Transcript_016199;Transcript_017082;Transcript_017241;Transcript_018411;Transcript_018951;Transcript_020244;Tra…
GO:0005618	C:cell_wall_	226	8.61285e-27	Transcript_000129;Transcript_001808;Transcript_003467;Transcript_003558;Transcript_004523;Transcript_005137;Transcript_005471;Transcript_006427;Transcript_007166;Transcript_007704;Transcript_007859;Transcript_007932;Transcript_008470;Transcript_008841;Transcript_009185;Transcript_009218;Transcript_009546;Transcript_010491;Transcript_012072;Transcript_012139;Transcript_012289;Transcript_012421;Tra…
GO:0000812	C:Swr1_complex	2	0.0224103	Transcript_182959;Transcript_231597
GO:0009861	P:jasmonic_acid_and_ethylene-dependent_systemic_resistance	7	1	Transcript_023102;Transcript_118655;Transcript_131178;Transcript_157364;Transcript_202542;Transcript_225280;Transcript_230696
GO:2000021	P:regulation_of_ion_homeostasis	2	0.695033	Transcript_222352;Transcript_235965
GO:0033523	P:histone_H2B_ubiquitination	3	0.179749	Transcript_181272;Transcript_227832;Transcript_244041
GO:0044594	F:17-beta-hydroxysteroid_dehydrogenase_(NAD+)_activity	2	0.281171	Transcript_186294;Transcript_206123
GO:0010229	P:inflorescence_development	10	0.00725813	Transcript_016036;Transcript_017714;Transcript_022653;Transcript_027827;Transcript_063040;Transcript_175161;Transcript_188850;Transcript_194595;Transcript_223607;Transcript_232798
GO:0035335	P:peptidyl-tyrosine_dephosphorylation	7	0.618024	Transcript_004615;Transcript_005951;Transcript_035784;Transcript_043346;Transcript_112814;Transcript_121187;Transcript_235705
ko05214	Glioma	11	0.00687556	Transcript_004615;Transcript_018125;Transcript_024575;Transcript_033023;Transcript_035784;Transcript_072106;Transcript_112814;Transcript_223900;Transcript_225466;Transcript_230696;Transcript_240310
GO:0009792	P:embryo_development_ending_in_birth_or_egg_hatching	2	0.0412318	Transcript_004468;Transcript_167263
GO:0004177	F:aminopeptidase_activity	20	5.00072e-05	Transcript_030606;Transcript_036231;Transcript_065435;Transcript_117669;Transcript_127316;Transcript_138634;Transcript_146367;Transcript_146634;Transcript_149721;Transcript_162521;Transcript_166670;Transcript_167138;Transcript_170633;Transcript_174117;Transcript_181757;Transcript_195101;Transcript_207269;Transcript_207354;Transcript_242140;Transcript_243498
GO:0010606	P:positive_regulation_of_cytoplasmic_mRNA_processing_body_assembly	4	0.79695	Transcript_007955;Transcript_013502;Transcript_197185;Transcript_222281
GO:0007004	P:telomere_maintenance_via_telomerase	2	0.602246	Transcript_044881;Transcript_233446
ko04510	Focal_adhesion	35	0.00651367	Transcript_004137;Transcript_004615;Transcript_007158;Transcript_009220;Transcript_013342;Transcript_013798;Transcript_015593;Transcript_021853;Transcript_024575;Transcript_025199;Transcript_032232;Transcript_033023;Transcript_035784;Transcript_043118;Transcript_058863;Transcript_072106;Transcript_107816;Transcript_112814;Transcript_150338;Transcript_150886;Transcript_162158;Transcript_172586;Tra…
GO:0015992	P:proton_transport	31	3.66239e-05	Transcript_005717;Transcript_009645;Transcript_012761;Transcript_025532;Transcript_028519;Transcript_037099;Transcript_042078;Transcript_042963;Transcript_054075;Transcript_062194;Transcript_084246;Transcript_091344;Transcript_110733;Transcript_112952;Transcript_141694;Transcript_150379;Transcript_156555;Transcript_160137;Transcript_180084;Transcript_184088;Transcript_191499;Transcript_228174;Tra…
GO:0050832	P:defense_response_to_fungus	72	1.61368e-10	Transcript_001411;Transcript_002815;Transcript_005159;Transcript_009590;Transcript_013227;Transcript_013523;Transcript_015989;Transcript_021363;Transcript_022180;Transcript_023102;Transcript_024022;Transcript_024829;Transcript_026286;Transcript_027836;Transcript_032039;Transcript_035463;Transcript_035826;Transcript_037711;Transcript_037997;Transcript_041692;Transcript_043939;Transcript_043940;Tra…
GO:0080123	F:jasmonate-amino_synthetase_activity_	2	0.776635	Transcript_067318;Transcript_160054
GO:0009409	P:response_to_cold	94	1.0096e-21	Transcript_002622;Transcript_007585;Transcript_012848;Transcript_014893;Transcript_014962;Transcript_015989;Transcript_016190;Transcript_016768;Transcript_017317;Transcript_017661;Transcript_018235;Transcript_020649;Transcript_021548;Transcript_022965;Transcript_024005;Transcript_024829;Transcript_025598;Transcript_026341;Transcript_028970;Transcript_029052;Transcript_029238;Transcript_030182;Tra…
GO:0006890	P:retrograde_vesicle-mediated_transport,_Golgi_to_ER	8	3.61449e-07	Transcript_001319;Transcript_004453;Transcript_046458;Transcript_140409;Transcript_151358;Transcript_188261;Transcript_237006;Transcript_242917
GO:1902417	F:(+)-abscisic_acid_D-glucopyranosyl_ester_transmembrane_transporter_activity	2	0.281171	Transcript_007741;Transcript_106913
GO:0010467	P:gene_expression	29	0.000983495	Transcript_008762;Transcript_011217;Transcript_011857;Transcript_012170;Transcript_013502;Transcript_014243;Transcript_020339;Transcript_088787;Transcript_091277;Transcript_100318;Transcript_136358;Transcript_144293;Transcript_181957;Transcript_187896;Transcript_194208;Transcript_206492;Transcript_222902;Transcript_225125;Transcript_227922;Transcript_229824;Transcript_229927;Transcript_232785;Tra…
GO:0009833	P:plant-type_primary_cell_wall_biogenesis	9	0.471653	Transcript_009608;Transcript_029920;Transcript_090987;Transcript_148491;Transcript_151188;Transcript_156020;Transcript_224594;Transcript_235645;Transcript_236983
GO:0004852	F:uroporphyrinogen-III_synthase_activity	2	0.695033	Transcript_011056;Transcript_154440
GO:0007049	P:cell_cycle_	86	4.26287e-10	Transcript_001527;Transcript_002736;Transcript_007510;Transcript_007537;Transcript_007581;Transcript_008644;Transcript_008889;Transcript_009156;Transcript_014548;Transcript_014718;Transcript_015116;Transcript_016485;Transcript_020976;Transcript_022364;Transcript_023583;Transcript_024356;Transcript_028117;Transcript_028330;Transcript_033781;Transcript_034489;Transcript_034661;Transcript_040432;Tra…
GO:0051015	F:actin_filament_binding	13	0.0121584	Transcript_007130;Transcript_009570;Transcript_011795;Transcript_016963;Transcript_152731;Transcript_153842;Transcript_154200;Transcript_181944;Transcript_192590;Transcript_214298;Transcript_217583;Transcript_222718;Transcript_229172
GO:1990112	C:RQC_complex	2	0.281171	Transcript_014837;Transcript_187570
GO:0055075	P:potassium_ion_homeostasis	5	0.0184647	Transcript_015622;Transcript_017027;Transcript_184704;Transcript_230064;Transcript_241768
GO:0046854	P:phosphatidylinositol_phosphorylation	20	0.00102034	Transcript_005928;Transcript_008140;Transcript_008396;Transcript_011252;Transcript_019778;Transcript_028100;Transcript_042777;Transcript_043137;Transcript_075635;Transcript_088132;Transcript_099453;Transcript_151452;Transcript_183950;Transcript_185415;Transcript_192590;Transcript_212610;Transcript_222019;Transcript_222718;Transcript_230697;Transcript_230957
GO:0016279	F:protein-lysine_N-methyltransferase_activity	5	0.46668	Transcript_006791;Transcript_073238;Transcript_113936;Transcript_147437;Transcript_206732
GO:0030148	P:sphingolipid_biosynthetic_process	6	0.00271019	Transcript_023215;Transcript_094368;Transcript_106132;Transcript_156551;Transcript_170021;Transcript_240730
GO:0003824	F:catalytic_activity_	15	0.000678623	Transcript_014878;Transcript_017102;Transcript_017551;Transcript_039962;Transcript_061154;Transcript_085691;Transcript_086650;Transcript_107044;Transcript_107326;Transcript_115169;Transcript_152749;Transcript_162200;Transcript_171586;Transcript_197407;Transcript_224051
ko03020	RNA_polymerase	22	0.000120308	Transcript_005856;Transcript_021840;Transcript_024610;Transcript_028183;Transcript_029815;Transcript_030747;Transcript_045115;Transcript_045641;Transcript_049751;Transcript_147999;Transcript_150478;Transcript_153412;Transcript_194577;Transcript_200237;Transcript_204285;Transcript_213037;Transcript_239920;Transcript_240746;Transcript_241223;Transcript_241791;Transcript_243535;Transcript_244633
GO:0009556	P:microsporogenesis	16	0.059262	Transcript_003558;Transcript_011213;Transcript_016461;Transcript_025560;Transcript_105826;Transcript_105933;Transcript_154200;Transcript_155810;Transcript_156560;Transcript_171229;Transcript_189596;Transcript_199199;Transcript_214657;Transcript_224529;Transcript_225740;Transcript_229172
GO:0008553	F:hydrogen-exporting_ATPase_activity,_phosphorylative_mechanism	10	0.0470328	Transcript_002196;Transcript_005827;Transcript_058902;Transcript_075297;Transcript_166193;Transcript_175055;Transcript_211637;Transcript_222966;Transcript_228116;Transcript_235417
GO:0005199	F:structural_constituent_of_cell_wall	5	0.0701666	Transcript_052079;Transcript_136663;Transcript_160860;Transcript_197554;Transcript_211777
GO:0043562	P:cellular_response_to_nitrogen_levels	5	0.46668	Transcript_019242;Transcript_027691;Transcript_060127;Transcript_065059;Transcript_178354
GO:0006121	P:mitochondrial_electron_transport,_succinate_to_ubiquinone	10	0.768731	Transcript_087227;Transcript_143268;Transcript_143477;Transcript_166507;Transcript_168585;Transcript_193240;Transcript_223224;Transcript_227997;Transcript_230646;Transcript_242241
GO:0009961	P:response_to_1-aminocyclopropane-1-carboxylic_acid	3	1	Transcript_027918;Transcript_029582;Transcript_049608
GO:0051561	P:positive_regulation_of_mitochondrial_calcium_ion_concentration	3	1	Transcript_107188;Transcript_184894;Transcript_227906
GO:0070574	P:cadmium_ion_transmembrane_transport	2	0.154885	Transcript_095005;Transcript_169458
GO:0042552	P:myelination	5	1	Transcript_016560;Transcript_136358;Transcript_202365;Transcript_235275;Transcript_241752
GO:0006529	P:asparagine_biosynthetic_process	2	0.776635	Transcript_077883;Transcript_226879
GO:0010429	F:methyl-CpNpN_binding	4	0.671724	Transcript_018951;Transcript_102940;Transcript_222854;Transcript_243218
GO:0051307	P:meiotic_chromosome_separation	3	0.7609	Transcript_036301;Transcript_231717;Transcript_242034
GO:0019835	P:cytolysis	2	0.281171	Transcript_004696;Transcript_029887
GO:0072661	P:protein_targeting_to_plasma_membrane	3	0.0435642	Transcript_009045;Transcript_031584;Transcript_048938
GO:0034098	C:VCP-NPL4-UFD1_AAA_ATPase_complex	6	0.323224	Transcript_043267;Transcript_167263;Transcript_185466;Transcript_187570;Transcript_223185;Transcript_243895
GO:0046898	P:response_to_cycloheximide	7	0.151981	Transcript_042145;Transcript_042637;Transcript_043973;Transcript_085304;Transcript_105037;Transcript_230857;Transcript_242771
GO:0000105	P:histidine_biosynthetic_process	23	0.445279	Transcript_008396;Transcript_011114;Transcript_028392;Transcript_043137;Transcript_043511;Transcript_043951;Transcript_100671;Transcript_119910;Transcript_121446;Transcript_124818;Transcript_178290;Transcript_180347;Transcript_181581;Transcript_193202;Transcript_222033;Transcript_222717;Transcript_230667;Transcript_230697;Transcript_233807;Transcript_235207;Transcript_236752;Transcript_240620;Tra…
GO:0010222	P:stem_vascular_tissue_pattern_formation	11	0.503926	Transcript_029959;Transcript_034135;Transcript_041375;Transcript_107191;Transcript_151246;Transcript_176350;Transcript_177049;Transcript_189551;Transcript_236394;Transcript_240015;Transcript_244620
GO:0046873	F:metal_ion_transmembrane_transporter_activity	11	1	Transcript_000494;Transcript_003179;Transcript_008158;Transcript_011712;Transcript_017312;Transcript_088483;Transcript_098463;Transcript_150002;Transcript_172227;Transcript_187428;Transcript_227333
GO:0048188	C:Set1C/COMPASS_complex	2	0.0565074	Transcript_033155;Transcript_044888
GO:0032880	P:regulation_of_protein_localization	5	0.0184647	Transcript_011795;Transcript_026424;Transcript_053106;Transcript_152417;Transcript_242941
GO:0048367	P:shoot_system_development	21	0.0141174	Transcript_002138;Transcript_008506;Transcript_009269;Transcript_010014;Transcript_010967;Transcript_019242;Transcript_024957;Transcript_042942;Transcript_046818;Transcript_083120;Transcript_092175;Transcript_112363;Transcript_120946;Transcript_152324;Transcript_156525;Transcript_167570;Transcript_169275;Transcript_211107;Transcript_227844;Transcript_238686;Transcript_238932
GO:0006461	P:protein_complex_assembly	4	0.0963587	Transcript_133924;Transcript_144208;Transcript_227790;Transcript_241383
GO:0005956	C:protein_kinase_CK2_complex	4	0.268461	Transcript_012367;Transcript_052735;Transcript_228749;Transcript_234875
GO:0009851	P:auxin_biosynthetic_process	8	0.168987	Transcript_019242;Transcript_058415;Transcript_100125;Transcript_114879;Transcript_171926;Transcript_181018;Transcript_188188;Transcript_233163
GO:0016192	P:vesicle-mediated_transport	97	5.39697e-15	Transcript_006266;Transcript_009640;Transcript_010537;Transcript_013571;Transcript_016524;Transcript_017646;Transcript_017817;Transcript_018757;Transcript_019120;Transcript_020971;Transcript_021642;Transcript_023676;Transcript_024879;Transcript_025510;Transcript_027734;Transcript_028926;Transcript_029088;Transcript_030080;Transcript_030480;Transcript_034420;Transcript_035374;Transcript_035983;Tra…
GO:0005977	P:glycogen_metabolic_process	8	1	Transcript_003099;Transcript_019663;Transcript_029413;Transcript_096847;Transcript_160755;Transcript_170217;Transcript_172586;Transcript_243510
GO:0031595	C:nuclear_proteasome_complex	4	0.00593063	Transcript_070040;Transcript_233934;Transcript_234735;Transcript_240819
GO:0005242	F:inward_rectifier_potassium_channel_activity	3	0.527991	Transcript_199402;Transcript_201570;Transcript_231707
GO:0005763	C:mitochondrial_small_ribosomal_subunit	6	0.494742	Transcript_019547;Transcript_033251;Transcript_104420;Transcript_108013;Transcript_169159;Transcript_205833
GO:0051536	F:iron-sulfur_cluster_binding	17	0.00470615	Transcript_004749;Transcript_005814;Transcript_032961;Transcript_044798;Transcript_046915;Transcript_096109;Transcript_121593;Transcript_157598;Transcript_178251;Transcript_197489;Transcript_210023;Transcript_223103;Transcript_223781;Transcript_224690;Transcript_230407;Transcript_233798;Transcript_241831
GO:0008930	F:methylthioadenosine_nucleosidase_activity	4	0.367155	Transcript_008347;Transcript_152924;Transcript_174791;Transcript_238306
GO:0016798	F:hydrolase_activity,_acting_on_glycosyl_bonds	4	0.27286	Transcript_049632;Transcript_160485;Transcript_201965;Transcript_237367
GO:0007062	P:sister_chromatid_cohesion	9	0.0799093	Transcript_020142;Transcript_044013;Transcript_126991;Transcript_163580;Transcript_186835;Transcript_208085;Transcript_230454;Transcript_239972;Transcript_244041
GO:0004647	F:phosphoserine_phosphatase_activity	8	0.868251	Transcript_011997;Transcript_060294;Transcript_083652;Transcript_150880;Transcript_154621;Transcript_154812;Transcript_169548;Transcript_229190
GO:0009718	P:anthocyanin-containing_compound_biosynthetic_process	12	0.0131348	Transcript_008730;Transcript_009214;Transcript_013868;Transcript_027809;Transcript_165735;Transcript_166278;Transcript_197158;Transcript_207403;Transcript_225851;Transcript_238716;Transcript_240878;Transcript_241559
GO:0008705	F:methionine_synthase_activity	2	0.695033	Transcript_159956;Transcript_177591
GO:0046939	P:nucleotide_phosphorylation	6	0.040022	Transcript_033086;Transcript_043717;Transcript_043956;Transcript_123290;Transcript_198468;Transcript_242056
GO:0030688	C:preribosome,_small_subunit_precursor	4	0.671724	Transcript_029996;Transcript_164520;Transcript_181063;Transcript_237612
GO:0046040	P:IMP_metabolic_process	2	0.695033	Transcript_061836;Transcript_229920
GO:0090409	F:malonyl-CoA_synthetase_activity	2	1	Transcript_043867;Transcript_155415
GO:0000354	P:cis_assembly_of_pre-catalytic_spliceosome	3	0.471648	Transcript_011350;Transcript_043889;Transcript_165606
GO:0035061	C:interchromatin_granule_	5	0.840345	Transcript_040611;Transcript_180006;Transcript_195544;Transcript_219142;Transcript_233367
GO:0004058	F:aromatic-L-amino-acid_decarboxylase_activity_	3	0.179749	Transcript_152632;Transcript_175390;Transcript_242408
GO:0004712	F:protein_serine/threonine/tyrosine_kinase_activity	14	0.00290887	Transcript_009616;Transcript_014265;Transcript_015977;Transcript_016649;Transcript_019067;Transcript_080417;Transcript_138004;Transcript_145272;Transcript_159854;Transcript_226544;Transcript_231812;Transcript_232777;Transcript_233522;Transcript_234008
GO:0052725	F:inositol-1,3,4-trisphosphate_6-kinase_activity	3	0.237067	Transcript_179107;Transcript_213968;Transcript_232890
GO:0006298	P:mismatch_repair	8	0.855416	Transcript_019041;Transcript_142487;Transcript_159267;Transcript_163281;Transcript_167419;Transcript_237228;Transcript_237928;Transcript_241251
GO:0048749	P:compound_eye_development	5	0.46668	Transcript_007576;Transcript_211725;Transcript_233424;Transcript_234350;Transcript_238423
GO:0015780	P:nucleotide-sugar_transport	5	0.375434	Transcript_009549;Transcript_105150;Transcript_163360;Transcript_204104;Transcript_244821
GO:0030234	F:enzyme_regulator_activity	10	0.0239681	Transcript_017330;Transcript_102815;Transcript_147794;Transcript_149725;Transcript_160959;Transcript_186313;Transcript_191303;Transcript_229017;Transcript_233626;Transcript_233852
GO:0047325	F:inositol_tetrakisphosphate_1-kinase_activity	3	0.303101	Transcript_179107;Transcript_213968;Transcript_232890
GO:0007568	P:aging	8	0.0563743	Transcript_030182;Transcript_044805;Transcript_087523;Transcript_150276;Transcript_153902;Transcript_163791;Transcript_166714;Transcript_226819
GO:0080151	P:positive_regulation_of_salicylic_acid_mediated_signaling_pathway	2	0.695033	Transcript_003321;Transcript_095376
GO:0016323	C:basolateral_plasma_membrane	6	0.107146	Transcript_026391;Transcript_062378;Transcript_196140;Transcript_202986;Transcript_229953;Transcript_240974
GO:0016817	F:hydrolase_activity,_acting_on_acid_anhydrides	2	1	Transcript_028622;Transcript_215514
GO:0015774	P:polysaccharide_transport	2	1	Transcript_020649;Transcript_234215
GO:0032465	P:regulation_of_cytokinesis	3	0.393222	Transcript_028330;Transcript_137349;Transcript_229190
GO:0006342	P:chromatin_silencing	13	0.0663967	Transcript_000262;Transcript_015894;Transcript_017085;Transcript_017511;Transcript_098359;Transcript_159985;Transcript_161801;Transcript_189892;Transcript_224103;Transcript_233298;Transcript_237879;Transcript_238771;Transcript_243606
GO:0080086	P:stamen_filament_development	3	0.0435642	Transcript_101298;Transcript_150413;Transcript_242133
GO:0060047	P:heart_contraction	2	1	Transcript_036623;Transcript_180285
GO:0004365	F:glyceraldehyde-3-phosphate_dehydrogenase_(NAD+)_(phosphorylating)_activity	9	0.0994479	Transcript_010009;Transcript_046693;Transcript_072674;Transcript_098378;Transcript_154258;Transcript_175272;Transcript_222152;Transcript_222505;Transcript_231882
GO:0015827	P:tryptophan_transport	2	0.776635	Transcript_222474;Transcript_231171
GO:0004814	F:arginine-tRNA_ligase_activity	3	0.639444	Transcript_012905;Transcript_046051;Transcript_235464
ko04392	Hippo_signaling_pathway_-multiple_species	6	2.34382e-05	Transcript_011213;Transcript_025560;Transcript_043323;Transcript_081735;Transcript_233768;Transcript_244253
GO:0010476	P:gibberellin_mediated_signaling_pathway	5	0.810889	Transcript_012159;Transcript_041608;Transcript_080059;Transcript_159892;Transcript_175089
GO:0006012	P:galactose_metabolic_process	13	0.00618417	Transcript_018508;Transcript_043532;Transcript_044928;Transcript_055288;Transcript_078007;Transcript_129362;Transcript_157191;Transcript_161647;Transcript_186756;Transcript_187407;Transcript_229272;Transcript_232274;Transcript_232368
ko00790	Folate_biosynthesis	7	0.00798994	Transcript_013938;Transcript_015457;Transcript_029104;Transcript_036855;Transcript_052869;Transcript_057252;Transcript_239210
GO:0008171	F:O-methyltransferase_activity	2	0.256238	Transcript_202952;Transcript_244699
GO:0030276	F:clathrin_binding	10	1	Transcript_016138;Transcript_069040;Transcript_095738;Transcript_098313;Transcript_180539;Transcript_185303;Transcript_206510;Transcript_231515;Transcript_232203;Transcript_240491
GO:0010964	P:regulation_of_chromatin_silencing_by_small_RNA	3	1	Transcript_027294;Transcript_048515;Transcript_242135
GO:0039689	P:negative_stranded_viral_RNA_replication	3	0.471648	Transcript_009564;Transcript_043173;Transcript_161919
ko05212	Pancreatic_cancer	21	0.0854026	Transcript_012092;Transcript_021853;Transcript_024575;Transcript_033023;Transcript_043118;Transcript_058863;Transcript_072106;Transcript_087535;Transcript_096279;Transcript_150338;Transcript_150886;Transcript_162158;Transcript_207470;Transcript_223900;Transcript_224126;Transcript_230020;Transcript_230696;Transcript_231953;Transcript_236061;Transcript_239220;Transcript_240310
GO:0004400	F:histidinol-phosphate_transaminase_activity	6	0.323224	Transcript_043951;Transcript_100671;Transcript_119910;Transcript_124818;Transcript_181581;Transcript_193202
GO:0016767	F:geranylgeranyl-diphosphate_geranylgeranyltransferase_activity	3	0.7609	Transcript_005672;Transcript_056220;Transcript_234813
ko05130	Pathogenic_Escherichia_coli_infection	9	4.54331e-06	Transcript_005372;Transcript_009220;Transcript_016295;Transcript_026710;Transcript_044045;Transcript_059877;Transcript_197714;Transcript_233803;Transcript_237271
GO:0010064	P:embryonic_shoot_morphogenesis	2	1	Transcript_211495;Transcript_241131
GO:0051087	F:chaperone_binding	15	0.00673856	Transcript_003556;Transcript_024912;Transcript_028401;Transcript_036904;Transcript_042415;Transcript_043187;Transcript_043364;Transcript_073404;Transcript_187370;Transcript_210135;Transcript_219205;Transcript_226240;Transcript_235844;Transcript_239548;Transcript_240246
GO:0008886	F:glyceraldehyde-3-phosphate_dehydrogenase_(NADP+)_(non-phosphorylating)_activity	3	0.25427	Transcript_007567;Transcript_043303;Transcript_201333
GO:0030145	F:manganese_ion_binding	22	0.0128375	Transcript_003701;Transcript_008274;Transcript_012201;Transcript_017363;Transcript_036231;Transcript_037895;Transcript_064505;Transcript_065435;Transcript_096195;Transcript_117669;Transcript_135958;Transcript_138634;Transcript_150940;Transcript_151165;Transcript_169937;Transcript_170633;Transcript_174117;Transcript_225306;Transcript_226763;Transcript_228089;Transcript_228854;Transcript_233679
GO:0015271	F:outward_rectifier_potassium_channel_activity	2	0.406345	Transcript_009328;Transcript_213817
GO:0016752	F:sinapoyltransferase_activity	3	0.527991	Transcript_120825;Transcript_206959;Transcript_223016
GO:0090416	F:nicotinate_transporter_activity	3	0.645282	Transcript_102104;Transcript_141252;Transcript_234035
GO:0048040	F:UDP-glucuronate_decarboxylase_activity	5	0.0139338	Transcript_044948;Transcript_074488;Transcript_170719;Transcript_231808;Transcript_243836
GO:0030490	P:maturation_of_SSU-rRNA	4	0.0989074	Transcript_212567;Transcript_218128;Transcript_226381;Transcript_240140
GO:0042754	P:negative_regulation_of_circadian_rhythm	3	1	Transcript_146059;Transcript_240706;Transcript_241581
GO:0010215	P:cellulose_microfibril_organization	11	0.365105	Transcript_012910;Transcript_020976;Transcript_021680;Transcript_023052;Transcript_030514;Transcript_045691;Transcript_055390;Transcript_174111;Transcript_226538;Transcript_228244;Transcript_237103
ko03015	mRNA_surveillance_pathway	73	7.18841e-08	Transcript_004322;Transcript_004400;Transcript_005462;Transcript_005483;Transcript_006068;Transcript_007158;Transcript_008863;Transcript_009288;Transcript_009359;Transcript_013342;Transcript_013941;Transcript_016098;Transcript_017085;Transcript_018789;Transcript_020226;Transcript_020625;Transcript_021722;Transcript_023322;Transcript_023930;Transcript_024280;Transcript_025199;Transcript_032232;Tra…
GO:0030599	F:pectinesterase_activity	21	2.54905e-06	Transcript_005137;Transcript_012421;Transcript_017665;Transcript_028739;Transcript_045114;Transcript_069670;Transcript_128825;Transcript_143408;Transcript_148888;Transcript_149569;Transcript_150726;Transcript_152808;Transcript_163293;Transcript_173074;Transcript_175484;Transcript_186965;Transcript_206680;Transcript_210869;Transcript_224783;Transcript_225557;Transcript_235766
GO:0004161	F:dimethylallyltranstransferase_activity	5	0.304333	Transcript_023190;Transcript_047414;Transcript_138015;Transcript_195482;Transcript_213310
GO:0048814	P:regulation_of_dendrite_morphogenesis	2	1	Transcript_143707;Transcript_234710
GO:0010011	F:auxin_binding	5	0.189325	Transcript_014548;Transcript_226818;Transcript_230686;Transcript_237471;Transcript_239418
GO:0045909	P:positive_regulation_of_vasodilation	7	0.539813	Transcript_003866;Transcript_098425;Transcript_120546;Transcript_155875;Transcript_231033;Transcript_231455;Transcript_233435
ko04520	Adherens_junction	20	0.00458912	Transcript_007680;Transcript_009220;Transcript_021853;Transcript_043118;Transcript_058863;Transcript_072106;Transcript_098438;Transcript_150338;Transcript_150886;Transcript_162158;Transcript_207470;Transcript_223900;Transcript_224126;Transcript_228749;Transcript_230020;Transcript_230696;Transcript_231953;Transcript_234875;Transcript_236061;Transcript_239220
GO:0004345	F:glucose-6-phosphate_dehydrogenase_activity	5	0.0244423	Transcript_044519;Transcript_087536;Transcript_140584;Transcript_154864;Transcript_237713
GO:0008409	F:5'-3'_exonuclease_activity	3	0.506334	Transcript_101603;Transcript_151621;Transcript_186685
GO:0004028	F:3-chloroallyl_aldehyde_dehydrogenase_activity	5	0.571511	Transcript_042657;Transcript_042860;Transcript_126947;Transcript_132356;Transcript_161236
GO:0004124	F:cysteine_synthase_activity	5	0.148219	Transcript_017374;Transcript_041858;Transcript_125614;Transcript_235866;Transcript_243351
GO:0004605	F:phosphatidate_cytidylyltransferase_activity	2	0.343054	Transcript_000605;Transcript_148144
GO:0070072	P:vacuolar_proton-transporting_V-type_ATPase_complex_assembly	4	0.163503	Transcript_018249;Transcript_222954;Transcript_230173;Transcript_231016
GO:0006368	P:transcription_elongation_from_RNA_polymerase_II_promoter	7	0.00156183	Transcript_032961;Transcript_141279;Transcript_149744;Transcript_199090;Transcript_227860;Transcript_236405;Transcript_244889
GO:0090155	P:negative_regulation_of_sphingolipid_biosynthetic_process	5	0.251798	Transcript_038590;Transcript_185108;Transcript_226719;Transcript_227998;Transcript_243848
GO:0031572	P:G2_DNA_damage_checkpoint	4	0.825415	Transcript_026456;Transcript_060015;Transcript_188899;Transcript_240189
GO:0000725	P:recombinational_repair	2	1	Transcript_012325;Transcript_237865
GO:0045227	P:capsule_polysaccharide_biosynthetic_process	2	0.0224103	Transcript_232274;Transcript_232368
GO:0033178	C:proton-transporting_two-sector_ATPase_complex,_catalytic_domain_	3	0.179749	Transcript_011762;Transcript_225946;Transcript_241197
GO:0031627	P:telomeric_loop_formation	5	0.820517	Transcript_016940;Transcript_043166;Transcript_195595;Transcript_230244;Transcript_238263
GO:0033532	P:stachyose_biosynthetic_process	2	0.602246	Transcript_150401;Transcript_178757
GO:0009846	P:pollen_germination	18	0.000468994	Transcript_011648;Transcript_019058;Transcript_029052;Transcript_029238;Transcript_034819;Transcript_047047;Transcript_155810;Transcript_163516;Transcript_194040;Transcript_194350;Transcript_213391;Transcript_222031;Transcript_224892;Transcript_227195;Transcript_229003;Transcript_229675;Transcript_237445;Transcript_239941
GO:0048666	P:neuron_development	2	0.776635	Transcript_056952;Transcript_210991
GO:0016655	F:oxidoreductase_activity,_acting_on_NAD(P)H,_quinone_or_similar_compound_as_acceptor	3	0.639444	Transcript_009353;Transcript_023850;Transcript_152628
GO:0071712	P:ER-associated_misfolded_protein_catabolic_process	5	0.571511	Transcript_043267;Transcript_167263;Transcript_185466;Transcript_223185;Transcript_243895
GO:0009932	P:cell_tip_growth	6	0.000482262	Transcript_058422;Transcript_098153;Transcript_156933;Transcript_226655;Transcript_229566;Transcript_234339
ko05161	Hepatitis_B	22	0.000367747	Transcript_004615;Transcript_014718;Transcript_017841;Transcript_024575;Transcript_033023;Transcript_034028;Transcript_035784;Transcript_072106;Transcript_084855;Transcript_098438;Transcript_112814;Transcript_116101;Transcript_137918;Transcript_142487;Transcript_160451;Transcript_173351;Transcript_195934;Transcript_201468;Transcript_223900;Transcript_226819;Transcript_230696;Transcript_240310
GO:0008290	C:F-actin_capping_protein_complex	4	0.825415	Transcript_005804;Transcript_152731;Transcript_153842;Transcript_173264
GO:0004463	F:leukotriene-A4_hydrolase_activity	3	1	Transcript_024378;Transcript_154408;Transcript_241555
GO:0010280	F:UDP-L-rhamnose_synthase_activity	4	0.671724	Transcript_151232;Transcript_166028;Transcript_225662;Transcript_227002
GO:0030131	C:clathrin_adaptor_complex_	11	0.0141818	Transcript_015912;Transcript_030480;Transcript_048455;Transcript_108480;Transcript_187119;Transcript_221927;Transcript_227781;Transcript_230634;Transcript_231642;Transcript_238402;Transcript_242917
GO:0030272	F:5-formyltetrahydrofolate_cyclo-ligase_activity	2	1	Transcript_075216;Transcript_223521
GO:0045172	C:germline_ring_canal	2	0.281171	Transcript_011795;Transcript_186849
GO:0006693	P:prostaglandin_metabolic_process	2	0.695033	Transcript_032053;Transcript_192035
GO:0000795	C:synaptonemal_complex	3	0.645282	Transcript_019041;Transcript_024322;Transcript_240714
GO:0031123	P:RNA_3'-end_processing	4	1	Transcript_005483;Transcript_023322;Transcript_024280;Transcript_224551
GO:0042128	P:nitrate_assimilation	19	0.00211052	Transcript_005356;Transcript_009090;Transcript_016140;Transcript_016713;Transcript_018501;Transcript_018746;Transcript_025846;Transcript_030771;Transcript_037667;Transcript_045110;Transcript_155613;Transcript_178354;Transcript_205700;Transcript_223553;Transcript_224732;Transcript_233511;Transcript_235516;Transcript_236082;Transcript_243855
GO:0032040	C:small-subunit_processome	21	0.0512665	Transcript_003601;Transcript_006216;Transcript_017081;Transcript_018130;Transcript_027627;Transcript_028329;Transcript_050447;Transcript_104913;Transcript_130699;Transcript_142032;Transcript_149417;Transcript_164520;Transcript_170854;Transcript_202242;Transcript_205205;Transcript_224157;Transcript_225815;Transcript_231531;Transcript_234911;Transcript_238543;Transcript_243035
GO:0051085	P:chaperone_mediated_protein_folding_requiring_cofactor	3	0.165222	Transcript_043364;Transcript_221966;Transcript_240246
GO:0007616	P:long-term_memory	3	0.645282	Transcript_009163;Transcript_031338;Transcript_230393
GO:0052854	F:medium-chain-(S)-2-hydroxy-acid_oxidase_activity	3	0.645282	Transcript_019203;Transcript_192336;Transcript_236198
GO:0007338	P:single_fertilization	9	0.0098846	Transcript_002815;Transcript_035826;Transcript_080393;Transcript_108108;Transcript_144208;Transcript_152576;Transcript_160231;Transcript_194040;Transcript_239941
GO:0008574	F:ATP-dependent_microtubule_motor_activity,_plus-end-directed	2	0.343054	Transcript_154073;Transcript_241308
GO:0031969	C:chloroplast_membrane_	74	9.86176e-08	Transcript_001813;Transcript_002210;Transcript_004502;Transcript_006710;Transcript_007414;Transcript_007746;Transcript_008859;Transcript_009381;Transcript_009558;Transcript_012811;Transcript_016784;Transcript_019603;Transcript_021442;Transcript_026153;Transcript_027233;Transcript_029020;Transcript_029858;Transcript_030182;Transcript_034137;Transcript_039610;Transcript_041661;Transcript_041915;Tra…
GO:0008381	F:mechanically-gated_ion_channel_activity	3	0.179749	Transcript_020970;Transcript_162113;Transcript_241455
GO:0005839	C:proteasome_core_complex	15	0.000678623	Transcript_000167;Transcript_006763;Transcript_007681;Transcript_008699;Transcript_008784;Transcript_025293;Transcript_056267;Transcript_168142;Transcript_182463;Transcript_186929;Transcript_230912;Transcript_237043;Transcript_238392;Transcript_238571;Transcript_240282
GO:0035317	P:imaginal_disc-derived_wing_hair_organization	2	0.776635	Transcript_155059;Transcript_234710
GO:0009533	C:chloroplast_stromal_thylakoid	5	0.619411	Transcript_051541;Transcript_084874;Transcript_137483;Transcript_240003;Transcript_243223
GO:0009116	P:nucleoside_metabolic_process	10	0.348127	Transcript_004749;Transcript_008347;Transcript_014600;Transcript_086650;Transcript_096604;Transcript_152924;Transcript_189047;Transcript_224051;Transcript_235160;Transcript_238306
GO:0006096	P:glycolytic_process	61	7.46556e-12	Transcript_000864;Transcript_002074;Transcript_002622;Transcript_009341;Transcript_010009;Transcript_012876;Transcript_014026;Transcript_016745;Transcript_016946;Transcript_021556;Transcript_022259;Transcript_026348;Transcript_030690;Transcript_041807;Transcript_043175;Transcript_044024;Transcript_046693;Transcript_053448;Transcript_053730;Transcript_059518;Transcript_072674;Transcript_075145;Tra…
GO:0018344	P:protein_geranylgeranylation	2	0.256238	Transcript_005081;Transcript_152485
GO:0071345	P:cellular_response_to_cytokine_stimulus	2	1	Transcript_032947;Transcript_150877
GO:0030720	P:oocyte_localization_involved_in_germarium-derived_egg_chamber_formation	2	0.776635	Transcript_180291;Transcript_232658
GO:0071490	P:cellular_response_to_far_red_light	2	1	Transcript_001458;Transcript_094361
GO:0010800	P:positive_regulation_of_peptidyl-threonine_phosphorylation	2	0.695033	Transcript_172586;Transcript_226420
GO:0006431	P:methionyl-tRNA_aminoacylation	2	0.256238	Transcript_018756;Transcript_030797
GO:0002244	P:hematopoietic_progenitor_cell_differentiation	3	0.7609	Transcript_056560;Transcript_233899;Transcript_236631
ko00534	Glycosaminoglycan_biosynthesis_-_heparan_sulfate_/_heparin	4	0.79695	Transcript_032994;Transcript_180845;Transcript_227762;Transcript_237268
GO:0045893	P:positive_regulation_of_transcription,_DNA-templated	91	1.33264e-10	Transcript_000262;Transcript_002958;Transcript_004077;Transcript_004543;Transcript_006181;Transcript_009114;Transcript_011939;Transcript_015918;Transcript_017199;Transcript_018488;Transcript_019499;Transcript_020170;Transcript_021463;Transcript_021548;Transcript_022180;Transcript_023059;Transcript_025389;Transcript_026335;Transcript_027410;Transcript_027918;Transcript_029582;Transcript_032815;Tra…
GO:0042254	P:ribosome_biogenesis	42	0.00142363	Transcript_004748;Transcript_007789;Transcript_007868;Transcript_012571;Transcript_014241;Transcript_017152;Transcript_017225;Transcript_020926;Transcript_024187;Transcript_032948;Transcript_034522;Transcript_035138;Transcript_041496;Transcript_041888;Transcript_041937;Transcript_044417;Transcript_053759;Transcript_056560;Transcript_097385;Transcript_100252;Transcript_103493;Transcript_107572;Tra…
GO:0007264	P:small_GTPase_mediated_signal_transduction	56	1.03057e-06	Transcript_006668;Transcript_017817;Transcript_019120;Transcript_021642;Transcript_021853;Transcript_023025;Transcript_023404;Transcript_024879;Transcript_031755;Transcript_032817;Transcript_034972;Transcript_040488;Transcript_042002;Transcript_043118;Transcript_044030;Transcript_051673;Transcript_058863;Transcript_062906;Transcript_074050;Transcript_082384;Transcript_099926;Transcript_124502;Tra…
GO:0044805	P:late_nucleophagy	2	0.456579	Transcript_056825;Transcript_229224
ko00906	Carotenoid_biosynthesis	6	0.0235511	Transcript_024453;Transcript_043791;Transcript_044111;Transcript_194031;Transcript_228618;Transcript_240254
GO:0004571	F:mannosyl-oligosaccharide_1,2-alpha-mannosidase_activity	2	0.19603	Transcript_010111;Transcript_022804
GO:0006312	P:mitotic_recombination	3	0.232394	Transcript_019041;Transcript_144160;Transcript_241251
GO:0005102	F:receptor_binding	16	0.496807	Transcript_003866;Transcript_020722;Transcript_022357;Transcript_059959;Transcript_098359;Transcript_098425;Transcript_100904;Transcript_120546;Transcript_155875;Transcript_186294;Transcript_187781;Transcript_206123;Transcript_223881;Transcript_231033;Transcript_231455;Transcript_233435
GO:0030073	P:insulin_secretion	2	0.406345	Transcript_020722;Transcript_241752
GO:0009729	P:detection_of_brassinosteroid_stimulus	3	1	Transcript_044950;Transcript_138514;Transcript_188104
GO:0008276	F:protein_methyltransferase_activity	3	1	Transcript_081240;Transcript_164713;Transcript_200073
GO:0043220	C:Schmidt-Lanterman_incisure	2	0.154885	Transcript_043848;Transcript_225871
GO:0007548	P:sex_differentiation	2	1	Transcript_202376;Transcript_212971
GO:0009813	P:flavonoid_biosynthetic_process	50	0.000116489	Transcript_002649;Transcript_008307;Transcript_017321;Transcript_024370;Transcript_024622;Transcript_026411;Transcript_027327;Transcript_030283;Transcript_034581;Transcript_042995;Transcript_043008;Transcript_044300;Transcript_054428;Transcript_060031;Transcript_087500;Transcript_087653;Transcript_112743;Transcript_123603;Transcript_144277;Transcript_157914;Transcript_161896;Transcript_168034;Tra…
GO:0016529	C:sarcoplasmic_reticulum	5	0.696697	Transcript_015749;Transcript_020722;Transcript_089910;Transcript_107188;Transcript_232362
GO:0050178	F:phenylpyruvate_tautomerase_activity	4	0.433453	Transcript_025197;Transcript_043104;Transcript_223808;Transcript_240264
GO:0008312	F:7S_RNA_binding	8	0.869434	Transcript_012174;Transcript_016578;Transcript_152351;Transcript_217083;Transcript_225025;Transcript_229824;Transcript_242950;Transcript_243643
GO:0010452	P:histone_H3-K36_methylation	2	0.190669	Transcript_009114;Transcript_026454
GO:0004477	F:methenyltetrahydrofolate_cyclohydrolase_activity	4	0.671724	Transcript_222033;Transcript_222717;Transcript_230052;Transcript_236752
GO:0006641	P:triglyceride_metabolic_process	3	0.805419	Transcript_017025;Transcript_082038;Transcript_237545
GO:0035071	P:salivary_gland_cell_autophagic_cell_death	3	0.303101	Transcript_005422;Transcript_138761;Transcript_188629
GO:0004375	F:glycine_dehydrogenase_(decarboxylating)_activity	3	0.805419	Transcript_020553;Transcript_043020;Transcript_149311
GO:0004045	F:aminoacyl-tRNA_hydrolase_activity	3	0.135649	Transcript_041742;Transcript_053273;Transcript_226426
GO:0009505	C:plant-type_cell_wall	73	3.54319e-10	Transcript_005848;Transcript_007704;Transcript_008678;Transcript_009326;Transcript_009440;Transcript_009542;Transcript_016440;Transcript_017680;Transcript_019000;Transcript_020976;Transcript_024022;Transcript_029356;Transcript_042828;Transcript_045041;Transcript_045319;Transcript_051417;Transcript_059286;Transcript_064197;Transcript_074886;Transcript_081277;Transcript_091788;Transcript_093055;Tra…
GO:0005688	C:U6_snRNP	3	0.639444	Transcript_212567;Transcript_226381;Transcript_240140
GO:0012501	P:programmed_cell_death	7	0.00610749	Transcript_007212;Transcript_033085;Transcript_181202;Transcript_184748;Transcript_225125;Transcript_233846;Transcript_238053
GO:0042732	P:D-xylose_metabolic_process	8	0.0563743	Transcript_009214;Transcript_074488;Transcript_110876;Transcript_165735;Transcript_170719;Transcript_200667;Transcript_231808;Transcript_243836
GO:0004839	F:ubiquitin_activating_enzyme_activity	2	0.595334	Transcript_035014;Transcript_165186
GO:0009654	C:photosystem_II_oxygen_evolving_complex	14	0.072986	Transcript_016421;Transcript_023909;Transcript_042202;Transcript_050144;Transcript_051711;Transcript_124174;Transcript_135544;Transcript_153206;Transcript_164282;Transcript_188193;Transcript_230960;Transcript_237283;Transcript_241081;Transcript_243990
GO:0046861	C:glyoxysomal_membrane_	4	0.268461	Transcript_075423;Transcript_092161;Transcript_177792;Transcript_226289
GO:0008080	F:N-acetyltransferase_activity	5	0.148219	Transcript_004148;Transcript_028397;Transcript_033095;Transcript_182066;Transcript_188455
GO:0007298	P:border_follicle_cell_migration	3	0.805419	Transcript_011795;Transcript_155059;Transcript_233424
GO:0050567	F:glutaminyl-tRNA_synthase_(glutamine-hydrolyzing)_activity	4	0.563109	Transcript_003860;Transcript_032958;Transcript_056320;Transcript_240006
GO:0030497	P:fatty_acid_elongation	7	0.352837	Transcript_008856;Transcript_020272;Transcript_151169;Transcript_202366;Transcript_219145;Transcript_227665;Transcript_237837
GO:0003985	F:acetyl-CoA_C-acetyltransferase_activity	2	0.077373	Transcript_154295;Transcript_213391
GO:0004764	F:shikimate_3-dehydrogenase_(NADP+)_activity	3	1	Transcript_121188;Transcript_178011;Transcript_240170
GO:0010017	P:red_or_far-red_light_signaling_pathway	14	0.153471	Transcript_019499;Transcript_025389;Transcript_054583;Transcript_062461;Transcript_098916;Transcript_113639;Transcript_129681;Transcript_150535;Transcript_159497;Transcript_162731;Transcript_232273;Transcript_233811;Transcript_236712;Transcript_241259
GO:0009831	P:plant-type_cell_wall_modification_involved_in_multidimensional_cell_growth	3	1	Transcript_020976;Transcript_135210;Transcript_237103
GO:0000780	C:condensed_nuclear_chromosome,_centromeric_region	2	0.343054	Transcript_028330;Transcript_137349
GO:0045727	P:positive_regulation_of_translation	23	0.918814	Transcript_007997;Transcript_021548;Transcript_023930;Transcript_029376;Transcript_042815;Transcript_062313;Transcript_069962;Transcript_073634;Transcript_114209;Transcript_149141;Transcript_162817;Transcript_167485;Transcript_183576;Transcript_195266;Transcript_195533;Transcript_217493;Transcript_224299;Transcript_225309;Transcript_230739;Transcript_231215;Transcript_231918;Transcript_232785;Tra…
GO:0015145	F:monosaccharide_transmembrane_transporter_activity	3	0.0237529	Transcript_005717;Transcript_037099;Transcript_110733
GO:0051091	P:positive_regulation_of_sequence-specific_DNA_binding_transcription_factor_activity	7	0.844175	Transcript_018328;Transcript_043536;Transcript_044013;Transcript_049824;Transcript_081822;Transcript_204709;Transcript_222961
GO:0052596	F:phenethylamine:oxygen_oxidoreductase_(deaminating)_activity	4	0.211787	Transcript_007347;Transcript_158955;Transcript_195860;Transcript_222613
GO:0015800	P:acidic_amino_acid_transport	2	0.695033	Transcript_097145;Transcript_191348
GO:0009507	C:chloroplast	815	3.96424e-101	Transcript_001527;Transcript_001574;Transcript_001784;Transcript_002138;Transcript_002210;Transcript_002658;Transcript_002738;Transcript_003002;Transcript_003043;Transcript_003099;Transcript_003141;Transcript_003638;Transcript_003800;Transcript_003891;Transcript_004148;Transcript_004377;Transcript_004455;Transcript_004598;Transcript_005090;Transcript_005143;Transcript_005549;Transcript_005672;Tra…
GO:0043231	C:intracellular_membrane-bounded_organelle_	52	0.00184085	Transcript_000619;Transcript_005874;Transcript_007163;Transcript_008307;Transcript_009214;Transcript_009616;Transcript_012922;Transcript_015116;Transcript_017478;Transcript_017912;Transcript_021257;Transcript_030283;Transcript_034581;Transcript_044300;Transcript_044539;Transcript_055239;Transcript_087523;Transcript_087653;Transcript_089910;Transcript_091277;Transcript_112743;Transcript_123603;Tra…
GO:0004175	F:endopeptidase_activity	18	6.69801e-05	Transcript_000167;Transcript_005874;Transcript_006763;Transcript_007681;Transcript_056267;Transcript_131551;Transcript_166191;Transcript_168142;Transcript_186929;Transcript_223712;Transcript_223717;Transcript_231413;Transcript_233626;Transcript_233919;Transcript_237043;Transcript_238392;Transcript_238571;Transcript_240282
GO:0015969	P:guanosine_tetraphosphate_metabolic_process	8	0.265002	Transcript_041732;Transcript_042217;Transcript_149380;Transcript_180886;Transcript_192556;Transcript_211039;Transcript_228648;Transcript_232170
GO:0000288	P:nuclear-transcribed_mRNA_catabolic_process,_deadenylation-dependent_decay	8	0.375254	Transcript_012170;Transcript_013502;Transcript_014243;Transcript_093207;Transcript_144293;Transcript_199090;Transcript_236405;Transcript_240140
GO:0016303	F:1-phosphatidylinositol-3-kinase_activity	2	0.595334	Transcript_093969;Transcript_161484
GO:0004675	F:transmembrane_receptor_protein_serine/threonine_kinase_activity	147	4.02862e-18	Transcript_002815;Transcript_003470;Transcript_004406;Transcript_006813;Transcript_006997;Transcript_007730;Transcript_007871;Transcript_008282;Transcript_008894;Transcript_009319;Transcript_010355;Transcript_010393;Transcript_013070;Transcript_013533;Transcript_014113;Transcript_014332;Transcript_014496;Transcript_016479;Transcript_016769;Transcript_017104;Transcript_017724;Transcript_018492;Tra…
GO:0001501	P:skeletal_system_development	2	0.602246	Transcript_043267;Transcript_199269
GO:1990189	F:peptide-serine-N-acetyltransferase_activity	4	0.159854	Transcript_011202;Transcript_028397;Transcript_049200;Transcript_237265
GO:0033621	P:nuclear-transcribed_mRNA_catabolic_process,_meiosis-specific_transcripts	2	0.281171	Transcript_030389;Transcript_230188
GO:0045851	P:pH_reduction	3	0.527991	Transcript_225487;Transcript_226819;Transcript_240153
GO:0015994	P:chlorophyll_metabolic_process	2	0.14426	Transcript_025846;Transcript_228235
GO:0005086	F:ARF_guanyl-nucleotide_exchange_factor_activity	7	0.122759	Transcript_043900;Transcript_140409;Transcript_188261;Transcript_200583;Transcript_227747;Transcript_237445;Transcript_243463
GO:0009098	P:leucine_biosynthetic_process	9	0.0994479	Transcript_010400;Transcript_040344;Transcript_098609;Transcript_142023;Transcript_169815;Transcript_201132;Transcript_225154;Transcript_230378;Transcript_230674
GO:0002121	P:inter-male_aggressive_behavior	2	1	Transcript_009220;Transcript_138314
GO:1903401	P:L-lysine_transmembrane_transport	2	0.602246	Transcript_090893;Transcript_130814
GO:0097454	C:Schwann_cell_microvillus	2	0.154885	Transcript_043848;Transcript_225871
ko00120	Primary_bile_acid_biosynthesis	2	0.776635	Transcript_186294;Transcript_206123
GO:0016174	F:NAD(P)H_oxidase_activity	2	0.406345	Transcript_170181;Transcript_173310
GO:0031673	C:H_zone	3	1	Transcript_089910;Transcript_107188;Transcript_232362
GO:0033358	P:UDP-L-arabinose_biosynthetic_process	2	0.077373	Transcript_232274;Transcript_232368
GO:0010363	P:regulation_of_plant-type_hypersensitive_response	11	0.178644	Transcript_005159;Transcript_013466;Transcript_024829;Transcript_130283;Transcript_163023;Transcript_167861;Transcript_170567;Transcript_184641;Transcript_218928;Transcript_225061;Transcript_230080
GO:0015210	F:uracil_transmembrane_transporter_activity	4	0.79695	Transcript_015491;Transcript_023143;Transcript_029355;Transcript_235078
GO:0016311	P:dephosphorylation	66	0.0015055	Transcript_003866;Transcript_004695;Transcript_008396;Transcript_011997;Transcript_015160;Transcript_015717;Transcript_018042;Transcript_018641;Transcript_019058;Transcript_019424;Transcript_019778;Transcript_023452;Transcript_023851;Transcript_026294;Transcript_026852;Transcript_027233;Transcript_031017;Transcript_035318;Transcript_042777;Transcript_043137;Transcript_059039;Transcript_060294;Tra…
GO:0048488	P:synaptic_vesicle_endocytosis	2	0.602246	Transcript_211725;Transcript_238423
GO:0004861	F:cyclin-dependent_protein_serine/threonine_kinase_inhibitor_activity	4	0.27286	Transcript_029417;Transcript_158193;Transcript_168373;Transcript_198489
GO:0043481	P:anthocyanin_accumulation_in_tissues_in_response_to_UV_light_	6	0.716775	Transcript_160420;Transcript_186151;Transcript_186370;Transcript_226428;Transcript_229566;Transcript_234332
GO:0010971	P:positive_regulation_of_G2/M_transition_of_mitotic_cell_cycle	4	0.433453	Transcript_010727;Transcript_038794;Transcript_076125;Transcript_232277
GO:0048443	P:stamen_development	10	0.0470328	Transcript_014548;Transcript_034422;Transcript_113130;Transcript_150413;Transcript_160420;Transcript_186151;Transcript_186370;Transcript_226818;Transcript_230686;Transcript_234332
GO:0003735	F:structural_constituent_of_ribosome	332	4.17328e-36	Transcript_000250;Transcript_000260;Transcript_000373;Transcript_000399;Transcript_001111;Transcript_002218;Transcript_002363;Transcript_002555;Transcript_002658;Transcript_004360;Transcript_004748;Transcript_005041;Transcript_005881;Transcript_006817;Transcript_007059;Transcript_007166;Transcript_007168;Transcript_007278;Transcript_007649;Transcript_008453;Transcript_008644;Transcript_009487;Tra…
GO:0045927	P:positive_regulation_of_growth	2	0.776635	Transcript_029771;Transcript_186849
GO:0070389	P:chaperone_cofactor-dependent_protein_refolding	4	0.159854	Transcript_043364;Transcript_152444;Transcript_221966;Transcript_240246
GO:0019829	F:cation-transporting_ATPase_activity	4	0.433453	Transcript_009558;Transcript_133216;Transcript_208929;Transcript_233514
ko05016	Huntington's_disease	95	1.69871e-17	Transcript_002006;Transcript_005856;Transcript_007264;Transcript_008449;Transcript_009683;Transcript_013503;Transcript_015912;Transcript_018182;Transcript_020239;Transcript_024036;Transcript_024610;Transcript_026011;Transcript_026022;Transcript_027502;Transcript_029815;Transcript_030747;Transcript_038520;Transcript_043609;Transcript_043638;Transcript_044798;Transcript_045115;Transcript_045641;Tra…
GO:0005779	C:integral_component_of_peroxisomal_membrane_	7	0.357197	Transcript_099714;Transcript_125361;Transcript_153650;Transcript_160240;Transcript_177092;Transcript_192874;Transcript_243789
GO:0019985	P:translesion_synthesis	10	0.666305	Transcript_037537;Transcript_043267;Transcript_142487;Transcript_170938;Transcript_186066;Transcript_188899;Transcript_190556;Transcript_223070;Transcript_232986;Transcript_243895
GO:0009108	P:coenzyme_biosynthetic_process	5	0.696697	Transcript_018859;Transcript_036692;Transcript_130283;Transcript_225061;Transcript_230080
GO:0052662	F:zeaxanthin_epoxidase_activity	4	1	Transcript_026153;Transcript_034427;Transcript_069974;Transcript_152061
GO:0006488	P:dolichol-linked_oligosaccharide_biosynthetic_process	6	0.327925	Transcript_023970;Transcript_031084;Transcript_047963;Transcript_082760;Transcript_133277;Transcript_235176
GO:0005730	C:nucleolus	259	6.08741e-29	Transcript_002074;Transcript_002104;Transcript_003467;Transcript_003573;Transcript_003601;Transcript_004077;Transcript_004862;Transcript_006216;Transcript_006795;Transcript_007166;Transcript_007368;Transcript_007641;Transcript_007868;Transcript_008453;Transcript_012170;Transcript_012571;Transcript_012761;Transcript_015616;Transcript_015850;Transcript_016190;Transcript_016578;Transcript_016857;Tra…
GO:0045047	P:protein_targeting_to_ER	6	0.596737	Transcript_002830;Transcript_066587;Transcript_199414;Transcript_217083;Transcript_229824;Transcript_242950
GO:0006874	P:cellular_calcium_ion_homeostasis	10	0.414092	Transcript_003866;Transcript_015749;Transcript_098425;Transcript_120546;Transcript_155875;Transcript_186313;Transcript_197170;Transcript_231033;Transcript_231455;Transcript_233435
GO:0010050	P:vegetative_phase_change	8	0.0100792	Transcript_000262;Transcript_031201;Transcript_045110;Transcript_196830;Transcript_205700;Transcript_207218;Transcript_228679;Transcript_236082
GO:0000836	C:Hrd1p_ubiquitin_ligase_complex	2	0.406345	Transcript_201233;Transcript_243895
GO:0006913	P:nucleocytoplasmic_transport	9	0.0994479	Transcript_054999;Transcript_060640;Transcript_127937;Transcript_152995;Transcript_194208;Transcript_196706;Transcript_238406;Transcript_238854;Transcript_241241
GO:0048255	P:mRNA_stabilization	4	1	Transcript_035793;Transcript_085215;Transcript_231215;Transcript_232785
GO:0005852	C:eukaryotic_translation_initiation_factor_3_complex	21	0.00429929	Transcript_005862;Transcript_027137;Transcript_031078;Transcript_042090;Transcript_042480;Transcript_053540;Transcript_122362;Transcript_143419;Transcript_151486;Transcript_157065;Transcript_161069;Transcript_224747;Transcript_224892;Transcript_226346;Transcript_230763;Transcript_233021;Transcript_238376;Transcript_239262;Transcript_241862;Transcript_243256;Transcript_244379
GO:0019369	P:arachidonic_acid_metabolic_process	7	0.861535	Transcript_003866;Transcript_098425;Transcript_120546;Transcript_155875;Transcript_231033;Transcript_231455;Transcript_233435
GO:0019901	F:protein_kinase_binding	23	0.0352841	Transcript_009916;Transcript_016138;Transcript_017841;Transcript_024005;Transcript_043167;Transcript_043924;Transcript_044004;Transcript_044533;Transcript_055366;Transcript_091277;Transcript_095738;Transcript_107519;Transcript_172586;Transcript_180539;Transcript_183122;Transcript_207184;Transcript_227231;Transcript_230020;Transcript_232203;Transcript_232276;Transcript_233949;Transcript_238765;Tra…
GO:0009783	C:photosystem_II_antenna_complex	2	0.343054	Transcript_034467;Transcript_160052
ko04626	Plant-pathogen_interaction	72	2.27001e-11	Transcript_002509;Transcript_002794;Transcript_005780;Transcript_005989;Transcript_007081;Transcript_009385;Transcript_009893;Transcript_016356;Transcript_018125;Transcript_018534;Transcript_020078;Transcript_020718;Transcript_021235;Transcript_022223;Transcript_024268;Transcript_024575;Transcript_028717;Transcript_029005;Transcript_029297;Transcript_031644;Transcript_033023;Transcript_033217;Tra…
GO:0042974	F:retinoic_acid_receptor_binding	4	0.79695	Transcript_007955;Transcript_013502;Transcript_197185;Transcript_222281
GO:0008970	F:phosphatidylcholine_1-acylhydrolase_activity	6	0.0307277	Transcript_023308;Transcript_064311;Transcript_225427;Transcript_233571;Transcript_234471;Transcript_238067
GO:0005788	C:endoplasmic_reticulum_lumen	43	3.64371e-05	Transcript_002621;Transcript_003891;Transcript_004872;Transcript_005481;Transcript_005780;Transcript_018889;Transcript_019424;Transcript_020338;Transcript_029022;Transcript_029503;Transcript_029746;Transcript_034077;Transcript_036904;Transcript_040960;Transcript_041161;Transcript_043374;Transcript_111642;Transcript_122663;Transcript_134665;Transcript_140778;Transcript_141657;Transcript_143065;Tra…
GO:0006450	P:regulation_of_translational_fidelity	2	0.14426	Transcript_052947;Transcript_072501
GO:0003913	F:DNA_photolyase_activity	4	0.676899	Transcript_030846;Transcript_045924;Transcript_232749;Transcript_233547
GO:0019076	P:viral_release_from_host_cell	4	0.00762391	Transcript_016600;Transcript_028366;Transcript_226266;Transcript_234470
GO:0015935	C:small_ribosomal_subunit	16	0.000239775	Transcript_002658;Transcript_007168;Transcript_007278;Transcript_015650;Transcript_042416;Transcript_100702;Transcript_177064;Transcript_182577;Transcript_190380;Transcript_202455;Transcript_221808;Transcript_223399;Transcript_231678;Transcript_235033;Transcript_241508;Transcript_244559
GO:0006839	P:mitochondrial_transport	8	0.0563743	Transcript_067433;Transcript_084246;Transcript_089956;Transcript_167871;Transcript_222162;Transcript_236030;Transcript_238204;Transcript_238540
GO:0010026	P:trichome_differentiation	6	0.0307277	Transcript_011067;Transcript_027546;Transcript_042368;Transcript_232124;Transcript_235035;Transcript_242941
GO:0080188	P:RNA-directed_DNA_methylation	5	0.300018	Transcript_017661;Transcript_021440;Transcript_029815;Transcript_153412;Transcript_189673
GO:0006413	P:translational_initiation	18	0.005414	Transcript_012262;Transcript_014243;Transcript_016284;Transcript_016560;Transcript_021722;Transcript_030395;Transcript_084855;Transcript_091825;Transcript_136358;Transcript_157065;Transcript_159222;Transcript_202365;Transcript_222902;Transcript_224747;Transcript_230763;Transcript_235275;Transcript_239262;Transcript_241862
GO:0048024	P:regulation_of_mRNA_splicing,_via_spliceosome	3	0.805419	Transcript_130933;Transcript_195544;Transcript_219142
GO:0042393	F:histone_binding	16	0.00500811	Transcript_018951;Transcript_021440;Transcript_027294;Transcript_033155;Transcript_048515;Transcript_183851;Transcript_194208;Transcript_199156;Transcript_214395;Transcript_220498;Transcript_223230;Transcript_240253;Transcript_240558;Transcript_242135;Transcript_243218;Transcript_244509
GO:0005759	C:mitochondrial_matrix_	65	1.8778e-10	Transcript_002074;Transcript_006675;Transcript_006795;Transcript_007723;Transcript_011507;Transcript_022357;Transcript_027335;Transcript_029289;Transcript_029344;Transcript_029376;Transcript_030789;Transcript_034880;Transcript_035630;Transcript_035710;Transcript_035849;Transcript_036023;Transcript_041807;Transcript_041856;Transcript_042098;Transcript_043070;Transcript_046517;Transcript_052869;Tra…
GO:0009517	C:PSII_associated_light-harvesting_complex_II	2	0.256238	Transcript_034467;Transcript_160052
GO:0045988	P:negative_regulation_of_striated_muscle_contraction	3	1	Transcript_089910;Transcript_107188;Transcript_232362
GO:0034501	P:protein_localization_to_kinetochore	2	0.406345	Transcript_002482;Transcript_236051
GO:0015821	P:methionine_transport	3	0.165222	Transcript_009968;Transcript_201742;Transcript_236224
ko04130	SNARE_interactions_in_vesicular_transport	27	0.00017423	Transcript_009459;Transcript_009640;Transcript_013464;Transcript_017646;Transcript_033374;Transcript_037553;Transcript_037921;Transcript_048938;Transcript_075386;Transcript_127350;Transcript_141668;Transcript_149528;Transcript_151945;Transcript_158918;Transcript_164362;Transcript_187713;Transcript_191930;Transcript_193394;Transcript_199576;Transcript_224994;Transcript_227469;Transcript_233166;Tra…
GO:0004707	F:MAP_kinase_activity	16	0.0120775	Transcript_003783;Transcript_007356;Transcript_009323;Transcript_011523;Transcript_025365;Transcript_033141;Transcript_041771;Transcript_072106;Transcript_148996;Transcript_198758;Transcript_200984;Transcript_205022;Transcript_220369;Transcript_223900;Transcript_230696;Transcript_233981
GO:0006325	P:chromatin_organization	7	0.0766515	Transcript_016768;Transcript_026055;Transcript_042172;Transcript_140236;Transcript_161886;Transcript_200038;Transcript_237879
GO:0042026	P:protein_refolding	15	0.00537533	Transcript_006675;Transcript_024912;Transcript_028401;Transcript_041429;Transcript_069212;Transcript_073404;Transcript_150860;Transcript_172174;Transcript_181033;Transcript_184706;Transcript_187370;Transcript_219205;Transcript_226240;Transcript_233682;Transcript_234898
GO:0002213	P:defense_response_to_insect	4	0.0989074	Transcript_095376;Transcript_193866;Transcript_229970;Transcript_237727
GO:0015171	F:amino_acid_transmembrane_transporter_activity	9	0.00455114	Transcript_009632;Transcript_015355;Transcript_055855;Transcript_094165;Transcript_172783;Transcript_192923;Transcript_203753;Transcript_234323;Transcript_235231
GO:0051603	P:proteolysis_involved_in_cellular_protein_catabolic_process	24	0.00274772	Transcript_004696;Transcript_007729;Transcript_008699;Transcript_008784;Transcript_013501;Transcript_025293;Transcript_039672;Transcript_042077;Transcript_050769;Transcript_156977;Transcript_157109;Transcript_157316;Transcript_175518;Transcript_182463;Transcript_188629;Transcript_201430;Transcript_203899;Transcript_210999;Transcript_228272;Transcript_230464;Transcript_230849;Transcript_230912;Tra…
GO:0016604	C:nuclear_body	9	1	Transcript_016768;Transcript_017325;Transcript_030389;Transcript_032884;Transcript_039697;Transcript_103584;Transcript_192410;Transcript_230188;Transcript_239284
GO:0004775	F:succinate-CoA_ligase_(ADP-forming)_activity	5	0.46668	Transcript_006928;Transcript_172472;Transcript_183784;Transcript_227362;Transcript_243992
GO:0042781	F:3'-tRNA_processing_endoribonuclease_activity	3	0.232394	Transcript_021451;Transcript_062313;Transcript_188080
ko04071	Sphingolipid_signaling_pathway	43	2.86761e-07	Transcript_004615;Transcript_008863;Transcript_015593;Transcript_018314;Transcript_021853;Transcript_024575;Transcript_029041;Transcript_033023;Transcript_035784;Transcript_041949;Transcript_042466;Transcript_043118;Transcript_057809;Transcript_058863;Transcript_072106;Transcript_098400;Transcript_112814;Transcript_133924;Transcript_150338;Transcript_150886;Transcript_153043;Transcript_158638;Tra…
GO:0008643	P:carbohydrate_transport	37	0.000508335	Transcript_004778;Transcript_004811;Transcript_006913;Transcript_007746;Transcript_009549;Transcript_018706;Transcript_024981;Transcript_027427;Transcript_028619;Transcript_033779;Transcript_034534;Transcript_034599;Transcript_037099;Transcript_042797;Transcript_043552;Transcript_044160;Transcript_044586;Transcript_045088;Transcript_081078;Transcript_091809;Transcript_094512;Transcript_153093;Tra…
GO:0032301	C:MutSalpha_complex_	4	0.367155	Transcript_161971;Transcript_237928;Transcript_241251;Transcript_242155
GO:0000139	C:Golgi_membrane	238	5.51526e-41	Transcript_002026;Transcript_004125;Transcript_004453;Transcript_004905;Transcript_005277;Transcript_005595;Transcript_005874;Transcript_005880;Transcript_006193;Transcript_007379;Transcript_008147;Transcript_008169;Transcript_008292;Transcript_008375;Transcript_008962;Transcript_009549;Transcript_009640;Transcript_010173;Transcript_010967;Transcript_011648;Transcript_011799;Transcript_012922;Tra…
GO:0001700	P:embryonic_development_via_the_syncytial_blastoderm	3	1	Transcript_038194;Transcript_062378;Transcript_202986
GO:0000408	C:EKC/KEOPS_complex_	4	0.316916	Transcript_004531;Transcript_189717;Transcript_226090;Transcript_242469
GO:0040003	P:chitin-based_cuticle_development	2	1	Transcript_098359;Transcript_224482
GO:0007626	P:locomotory_behavior	3	0.179749	Transcript_062378;Transcript_164757;Transcript_202986
GO:0045451	P:pole_plasm_oskar_mRNA_localization	6	0.852045	Transcript_021722;Transcript_180291;Transcript_181944;Transcript_184391;Transcript_217583;Transcript_232658
GO:1900459	P:positive_regulation_of_brassinosteroid_mediated_signaling_pathway	4	0.0102776	Transcript_227616;Transcript_235398;Transcript_243291;Transcript_244323
GO:0015181	F:arginine_transmembrane_transporter_activity	2	0.602246	Transcript_090893;Transcript_130814
GO:0007178	P:transmembrane_receptor_protein_serine/threonine_kinase_signaling_pathway	147	4.02862e-18	Transcript_002815;Transcript_003470;Transcript_004406;Transcript_006813;Transcript_006997;Transcript_007730;Transcript_007871;Transcript_008282;Transcript_008894;Transcript_009319;Transcript_010355;Transcript_010393;Transcript_013070;Transcript_013533;Transcript_014113;Transcript_014332;Transcript_014496;Transcript_016479;Transcript_016769;Transcript_017104;Transcript_017724;Transcript_018492;Tra…
ko04930	Type_II_diabetes_mellitus	12	0.00822022	Transcript_000864;Transcript_002622;Transcript_012876;Transcript_014026;Transcript_043175;Transcript_044024;Transcript_072106;Transcript_223900;Transcript_225466;Transcript_230696;Transcript_243959;Transcript_244394
GO:0009686	P:gibberellin_biosynthetic_process	14	0.472962	Transcript_008834;Transcript_015520;Transcript_023251;Transcript_038632;Transcript_043066;Transcript_049607;Transcript_088439;Transcript_088442;Transcript_111838;Transcript_223581;Transcript_225035;Transcript_231861;Transcript_233522;Transcript_239712
GO:0006788	P:heme_oxidation	4	0.367155	Transcript_078683;Transcript_087500;Transcript_203622;Transcript_214489
GO:0043987	P:histone_H3-S10_phosphorylation	2	0.456579	Transcript_028330;Transcript_137349
ko04919	Thyroid_hormone_signaling_pathway	30	1.27723e-05	Transcript_004137;Transcript_007580;Transcript_009220;Transcript_013798;Transcript_015593;Transcript_024575;Transcript_026022;Transcript_026796;Transcript_033023;Transcript_072106;Transcript_095035;Transcript_098438;Transcript_127616;Transcript_140517;Transcript_154268;Transcript_158407;Transcript_159429;Transcript_172586;Transcript_174975;Transcript_213381;Transcript_223390;Transcript_223900;Tra…
GO:0015098	F:molybdate_ion_transmembrane_transporter_activity	3	0.645282	Transcript_003127;Transcript_017862;Transcript_137292
GO:0007399	P:nervous_system_development	4	0.0250591	Transcript_036623;Transcript_151249;Transcript_180285;Transcript_237581
GO:0006869	P:lipid_transport	37	0.000425257	Transcript_005011;Transcript_005655;Transcript_007331;Transcript_012404;Transcript_016519;Transcript_017859;Transcript_024022;Transcript_029499;Transcript_037262;Transcript_042181;Transcript_053565;Transcript_055239;Transcript_057851;Transcript_059959;Transcript_063233;Transcript_069564;Transcript_087523;Transcript_088509;Transcript_101590;Transcript_108108;Transcript_124171;Transcript_150018;Tra…
GO:0043953	P:protein_transport_by_the_Tat_complex	3	0.179749	Transcript_025324;Transcript_047240;Transcript_228071
GO:0009585	P:red,_far-red_light_phototransduction	32	0.00864428	Transcript_010727;Transcript_013223;Transcript_015917;Transcript_017666;Transcript_021463;Transcript_022116;Transcript_023280;Transcript_025389;Transcript_026115;Transcript_038794;Transcript_042563;Transcript_054583;Transcript_062461;Transcript_068885;Transcript_076125;Transcript_098916;Transcript_104775;Transcript_109012;Transcript_113639;Transcript_129681;Transcript_150413;Transcript_162200;Tra…
GO:0010329	F:auxin_efflux_transmembrane_transporter_activity	17	0.650899	Transcript_015508;Transcript_032581;Transcript_036881;Transcript_059532;Transcript_080441;Transcript_130684;Transcript_148175;Transcript_150662;Transcript_151834;Transcript_160420;Transcript_186151;Transcript_186370;Transcript_205465;Transcript_222312;Transcript_234332;Transcript_235363;Transcript_237078
GO:0042644	C:chloroplast_nucleoid	5	0.189325	Transcript_095546;Transcript_118184;Transcript_143674;Transcript_223131;Transcript_233833
GO:0015250	F:water_channel_activity	12	0.0318903	Transcript_009157;Transcript_020502;Transcript_029097;Transcript_042811;Transcript_052552;Transcript_150281;Transcript_156652;Transcript_167494;Transcript_188161;Transcript_239536;Transcript_243963;Transcript_244862
ko00400	Phenylalanine,_tyrosine_and_tryptophan_biosynthesis	29	2.64138e-05	Transcript_007002;Transcript_009163;Transcript_014426;Transcript_021564;Transcript_034831;Transcript_041699;Transcript_043951;Transcript_058157;Transcript_072021;Transcript_076134;Transcript_112721;Transcript_114879;Transcript_121188;Transcript_124754;Transcript_124818;Transcript_128204;Transcript_153648;Transcript_154084;Transcript_165950;Transcript_178011;Transcript_184433;Transcript_190091;Tra…
GO:0050377	F:UDP-glucose_4,6-dehydratase_activity	4	0.671724	Transcript_151232;Transcript_166028;Transcript_225662;Transcript_227002
GO:0048316	P:seed_development	23	0.000431925	Transcript_007914;Transcript_018261;Transcript_019041;Transcript_019779;Transcript_022364;Transcript_023949;Transcript_043175;Transcript_123603;Transcript_132731;Transcript_140079;Transcript_159838;Transcript_163281;Transcript_173042;Transcript_196132;Transcript_206425;Transcript_209684;Transcript_214919;Transcript_215504;Transcript_218059;Transcript_222274;Transcript_226156;Transcript_226883;Tra…
GO:0006598	P:polyamine_catabolic_process	5	0.46668	Transcript_157885;Transcript_223699;Transcript_227921;Transcript_238035;Transcript_240725
GO:1902475	P:L-alpha-amino_acid_transmembrane_transport	7	0.357197	Transcript_009968;Transcript_015355;Transcript_042885;Transcript_103108;Transcript_201742;Transcript_226922;Transcript_236224
ko00940	Phenylpropanoid_biosynthesis	44	1.85107e-05	Transcript_005848;Transcript_011264;Transcript_013231;Transcript_015066;Transcript_015432;Transcript_021674;Transcript_030283;Transcript_032050;Transcript_033454;Transcript_035390;Transcript_047179;Transcript_053013;Transcript_057145;Transcript_063128;Transcript_095323;Transcript_105073;Transcript_120825;Transcript_123017;Transcript_123493;Transcript_130237;Transcript_135597;Transcript_146059;Tra…
GO:0031349	P:positive_regulation_of_defense_response	2	0.343054	Transcript_014496;Transcript_068885
GO:0016078	P:tRNA_catabolic_process	2	0.154885	Transcript_030389;Transcript_230188
GO:0004325	F:ferrochelatase_activity	2	0.190669	Transcript_007658;Transcript_167861
GO:0007409	P:axonogenesis	7	0.518864	Transcript_093222;Transcript_150276;Transcript_151249;Transcript_153986;Transcript_196140;Transcript_210991;Transcript_233424
ko05222	Small_cell_lung_cancer	6	0.00613511	Transcript_004615;Transcript_035784;Transcript_112814;Transcript_225920;Transcript_238719;Transcript_240310
GO:0031901	C:early_endosome_membrane	11	0.00551912	Transcript_028938;Transcript_035629;Transcript_043900;Transcript_078372;Transcript_108480;Transcript_159466;Transcript_176604;Transcript_229747;Transcript_232209;Transcript_233044;Transcript_243463
ko00524	Butirosin_and_neomycin_biosynthesis	5	0.251798	Transcript_002622;Transcript_012876;Transcript_014026;Transcript_243959;Transcript_244394
GO:0042335	P:cuticle_development	16	0.903702	Transcript_004406;Transcript_005655;Transcript_007871;Transcript_007932;Transcript_024022;Transcript_082936;Transcript_114532;Transcript_138101;Transcript_164757;Transcript_208972;Transcript_226428;Transcript_234289;Transcript_235804;Transcript_236518;Transcript_241565;Transcript_242845
GO:0070615	F:nucleosome-dependent_ATPase_activity	2	0.776635	Transcript_122639;Transcript_187863
GO:0009396	P:folic_acid-containing_compound_biosynthetic_process	4	0.342182	Transcript_222033;Transcript_222717;Transcript_230052;Transcript_236752
GO:0042438	P:melanin_biosynthetic_process	2	1	Transcript_017580;Transcript_241752
GO:0030134	C:ER_to_Golgi_transport_vesicle	3	0.639444	Transcript_015058;Transcript_019749;Transcript_230225
GO:0036381	F:pyridoxal_5'-phosphate_synthase_(glutamine_hydrolysing)_activity_	4	0.544577	Transcript_111051;Transcript_113099;Transcript_187495;Transcript_228235
GO:0006491	P:N-glycan_processing	4	0.0242358	Transcript_010111;Transcript_022804;Transcript_215505;Transcript_232694
GO:0015713	P:phosphoglycerate_transport	5	1	Transcript_041661;Transcript_129426;Transcript_169940;Transcript_222145;Transcript_242666
GO:0048025	P:negative_regulation_of_mRNA_splicing,_via_spliceosome	5	0.101038	Transcript_006795;Transcript_074104;Transcript_124057;Transcript_160079;Transcript_210034
GO:0002230	P:positive_regulation_of_defense_response_to_virus_by_host	3	0.237067	Transcript_044722;Transcript_062009;Transcript_124057
GO:0016791	F:phosphatase_activity	22	0.914022	Transcript_003866;Transcript_004695;Transcript_015160;Transcript_018042;Transcript_018641;Transcript_060294;Transcript_098425;Transcript_100904;Transcript_111143;Transcript_120546;Transcript_154621;Transcript_155875;Transcript_160087;Transcript_172102;Transcript_227139;Transcript_229633;Transcript_231033;Transcript_231455;Transcript_233435;Transcript_239360;Transcript_242653;Transcript_243110
GO:0006449	P:regulation_of_translational_termination	3	0.393222	Transcript_009359;Transcript_014861;Transcript_110725
GO:0006749	P:glutathione_metabolic_process	6	0.13666	Transcript_003393;Transcript_026795;Transcript_036855;Transcript_155352;Transcript_187433;Transcript_209211
GO:0006656	P:phosphatidylcholine_biosynthetic_process	6	0.404187	Transcript_004796;Transcript_015409;Transcript_018787;Transcript_076539;Transcript_168649;Transcript_222174
GO:0005536	F:glucose_binding	6	1	Transcript_002622;Transcript_012876;Transcript_014026;Transcript_016745;Transcript_243959;Transcript_244394
GO:0035435	P:phosphate_ion_transmembrane_transport	14	0.544576	Transcript_002893;Transcript_008667;Transcript_018246;Transcript_024981;Transcript_043811;Transcript_056996;Transcript_057533;Transcript_123438;Transcript_167685;Transcript_191510;Transcript_210800;Transcript_225198;Transcript_228172;Transcript_228239
GO:0018108	P:peptidyl-tyrosine_phosphorylation	2	0.105779	Transcript_006433;Transcript_014496
GO:0004715	F:non-membrane_spanning_protein_tyrosine_kinase_activity	6	0.0180276	Transcript_009916;Transcript_044533;Transcript_055366;Transcript_107519;Transcript_162192;Transcript_244119
ko04711	Circadian_rhythm_-_fly	3	1	Transcript_004137;Transcript_013798;Transcript_172586
GO:0031410	C:cytoplasmic_vesicle	4	0.0427763	Transcript_112191;Transcript_184298;Transcript_186430;Transcript_228959
GO:0003935	F:GTP_cyclohydrolase_II_activity	2	0.190669	Transcript_154762;Transcript_237879
ko04540	Gap_junction	11	0.000944354	Transcript_016295;Transcript_024575;Transcript_031338;Transcript_033023;Transcript_044045;Transcript_059877;Transcript_072106;Transcript_223900;Transcript_230696;Transcript_233803;Transcript_237271
GO:0008124	F:4-alpha-hydroxytetrahydrobiopterin_dehydratase_activity_	3	0.303101	Transcript_136582;Transcript_160391;Transcript_242342
GO:0010305	P:leaf_vascular_tissue_pattern_formation	12	0.0064969	Transcript_035477;Transcript_112363;Transcript_146007;Transcript_155722;Transcript_159221;Transcript_180054;Transcript_188960;Transcript_224314;Transcript_233847;Transcript_234684;Transcript_241446;Transcript_243937
GO:0060919	P:auxin_influx	2	0.19603	Transcript_234332;Transcript_237078
GO:0045471	P:response_to_ethanol	2	0.105779	Transcript_034880;Transcript_226151
GO:0030003	P:cellular_cation_homeostasis	2	1	Transcript_228469;Transcript_235656
GO:0009855	P:determination_of_bilateral_symmetry	4	0.671724	Transcript_006567;Transcript_023059;Transcript_030458;Transcript_143279
GO:0008964	F:phosphoenolpyruvate_carboxylase_activity	5	0.375434	Transcript_042444;Transcript_111072;Transcript_165354;Transcript_181595;Transcript_234176
GO:0030247	F:polysaccharide_binding	17	0.250005	Transcript_002488;Transcript_003470;Transcript_013070;Transcript_034983;Transcript_037676;Transcript_092599;Transcript_093993;Transcript_098961;Transcript_103239;Transcript_177185;Transcript_184393;Transcript_187114;Transcript_212366;Transcript_225565;Transcript_229195;Transcript_232414;Transcript_244302
GO:0010471	F:GDP-galactose:mannose-1-phosphate_guanylyltransferase_activity	2	0.105779	Transcript_166916;Transcript_233591
GO:0071368	P:cellular_response_to_cytokinin_stimulus	4	1	Transcript_009214;Transcript_016556;Transcript_141463;Transcript_165735
GO:0008266	F:poly(U)_RNA_binding	8	0.171634	Transcript_022940;Transcript_023301;Transcript_075492;Transcript_140909;Transcript_153368;Transcript_206305;Transcript_243141;Transcript_243207
GO:0000917	P:barrier_septum_assembly	2	0.776635	Transcript_176692;Transcript_242111
ko04925	Aldosterone_synthesis_and_secretion	2	0.14426	Transcript_018125;Transcript_183936
ko05031	Amphetamine_addiction	15	0.024287	Transcript_007158;Transcript_010012;Transcript_012094;Transcript_013342;Transcript_018125;Transcript_025199;Transcript_032232;Transcript_059039;Transcript_092873;Transcript_107816;Transcript_227920;Transcript_228108;Transcript_233608;Transcript_239079;Transcript_241854
GO:0019786	F:Atg8-specific_protease_activity	2	1	Transcript_104899;Transcript_186342
GO:0009691	P:cytokinin_biosynthetic_process	11	0.777903	Transcript_017357;Transcript_039162;Transcript_060942;Transcript_124970;Transcript_146228;Transcript_162634;Transcript_184067;Transcript_185459;Transcript_207317;Transcript_230442;Transcript_239518
ko04725	Cholinergic_synapse	5	0.118091	Transcript_024575;Transcript_033023;Transcript_072106;Transcript_223900;Transcript_230696
GO:0051131	P:chaperone-mediated_protein_complex_assembly	12	0.229617	Transcript_003556;Transcript_014498;Transcript_019194;Transcript_024203;Transcript_028908;Transcript_035630;Transcript_042415;Transcript_043187;Transcript_044153;Transcript_062758;Transcript_120658;Transcript_235844
GO:0021756	P:striatum_development	2	0.281171	Transcript_053448;Transcript_097665
GO:0032436	P:positive_regulation_of_proteasomal_ubiquitin-dependent_protein_catabolic_process	8	0.0100792	Transcript_037537;Transcript_114276;Transcript_147164;Transcript_172586;Transcript_185446;Transcript_226233;Transcript_241734;Transcript_243895
GO:0004650	F:polygalacturonase_activity	21	0.00280041	Transcript_003558;Transcript_004523;Transcript_005471;Transcript_010491;Transcript_017092;Transcript_025932;Transcript_051949;Transcript_080111;Transcript_105933;Transcript_114411;Transcript_157022;Transcript_170555;Transcript_188317;Transcript_189347;Transcript_228069;Transcript_229910;Transcript_232032;Transcript_238989;Transcript_239804;Transcript_241542;Transcript_242516
GO:0055062	P:phosphate_ion_homeostasis	6	0.213234	Transcript_024981;Transcript_167685;Transcript_205919;Transcript_223780;Transcript_232675;Transcript_235245
ko04932	Non-alcoholic_fatty_liver_disease_(NAFLD)	72	2.52984e-09	Transcript_001724;Transcript_004137;Transcript_009683;Transcript_013503;Transcript_013798;Transcript_018182;Transcript_020239;Transcript_020615;Transcript_021853;Transcript_026011;Transcript_034582;Transcript_038520;Transcript_043118;Transcript_043609;Transcript_043638;Transcript_044798;Transcript_045110;Transcript_049612;Transcript_051177;Transcript_052634;Transcript_058642;Transcript_058863;Tra…
ko04670	Leukocyte_transendothelial_migration	13	0.0446641	Transcript_009220;Transcript_021853;Transcript_043118;Transcript_058863;Transcript_150338;Transcript_150886;Transcript_162158;Transcript_207470;Transcript_224126;Transcript_230020;Transcript_231953;Transcript_236061;Transcript_239220
GO:0010564	P:regulation_of_cell_cycle_process	2	1	Transcript_023059;Transcript_186835
GO:0042761	P:very_long-chain_fatty_acid_biosynthetic_process	4	0.0963587	Transcript_155818;Transcript_219145;Transcript_227665;Transcript_231679
GO:0009913	P:epidermal_cell_differentiation	3	0.506334	Transcript_020755;Transcript_043334;Transcript_188406
GO:0030136	C:clathrin-coated_vesicle_	20	0.00458912	Transcript_023412;Transcript_026408;Transcript_030232;Transcript_042258;Transcript_042508;Transcript_044305;Transcript_069040;Transcript_077172;Transcript_079019;Transcript_156391;Transcript_161356;Transcript_161482;Transcript_171440;Transcript_173049;Transcript_173572;Transcript_184894;Transcript_185303;Transcript_193877;Transcript_231515;Transcript_243579
GO:0009790	P:embryo_development	6	0.0036296	Transcript_041661;Transcript_064939;Transcript_078438;Transcript_147437;Transcript_223193;Transcript_242666
GO:0000323	C:lytic_vacuole	3	0.527991	Transcript_160420;Transcript_186370;Transcript_205465
GO:0003677	F:DNA_binding	702	6.54664e-78	Transcript_000082;Transcript_000135;Transcript_000274;Transcript_000620;Transcript_000919;Transcript_001687;Transcript_002119;Transcript_002637;Transcript_002654;Transcript_002958;Transcript_003477;Transcript_003554;Transcript_003587;Transcript_003883;Transcript_004077;Transcript_004957;Transcript_005337;Transcript_005381;Transcript_005569;Transcript_005803;Transcript_005856;Transcript_006181;Tra…
GO:0003844	F:1,4-alpha-glucan_branching_enzyme_activity	4	0.79695	Transcript_090732;Transcript_160755;Transcript_234708;Transcript_240005
GO:0047451	F:3-hydroxyoctanoyl-acyl-carrier-protein_dehydratase_activity	5	1	Transcript_066148;Transcript_127755;Transcript_155023;Transcript_189857;Transcript_235637
GO:0009800	P:cinnamic_acid_biosynthetic_process	7	0.621701	Transcript_016111;Transcript_018189;Transcript_041830;Transcript_062694;Transcript_176785;Transcript_183711;Transcript_235963
ko00785	Lipoic_acid_metabolism	2	0.0311089	Transcript_062768;Transcript_242465
GO:0034715	C:pICln-Sm_protein_complex	3	0.393222	Transcript_002011;Transcript_042810;Transcript_228355
GO:0010598	C:NAD(P)H_dehydrogenase_complex_(plastoquinone)	4	0.544577	Transcript_005090;Transcript_009353;Transcript_028581;Transcript_128580
GO:0009738	P:abscisic_acid-activated_signaling_pathway	112	5.37032e-05	Transcript_002815;Transcript_006181;Transcript_006800;Transcript_006967;Transcript_007535;Transcript_009893;Transcript_010012;Transcript_010014;Transcript_012094;Transcript_012756;Transcript_013144;Transcript_016311;Transcript_017908;Transcript_018199;Transcript_018281;Transcript_018802;Transcript_020078;Transcript_020976;Transcript_022223;Transcript_022965;Transcript_024005;Transcript_024829;Tra…
GO:0006349	P:regulation_of_gene_expression_by_genetic_imprinting	4	0.0138474	Transcript_083651;Transcript_107774;Transcript_172586;Transcript_207206
ko00196	Photosynthesis_-_antenna_proteins	9	0.033057	Transcript_001398;Transcript_034467;Transcript_152342;Transcript_155928;Transcript_160052;Transcript_201460;Transcript_223379;Transcript_228305;Transcript_240528
GO:0070084	P:protein_initiator_methionine_removal	4	0.27286	Transcript_028595;Transcript_094431;Transcript_100636;Transcript_107125
GO:0004888	F:transmembrane_signaling_receptor_activity	3	0.639444	Transcript_028622;Transcript_225487;Transcript_240153
GO:1901264	P:carbohydrate_derivative_transport	3	0.088957	Transcript_023429;Transcript_089910;Transcript_140672
GO:0016226	P:iron-sulfur_cluster_assembly	20	3.04677e-05	Transcript_009517;Transcript_025633;Transcript_030702;Transcript_096109;Transcript_121593;Transcript_136401;Transcript_140366;Transcript_149065;Transcript_177251;Transcript_178251;Transcript_198137;Transcript_198282;Transcript_210023;Transcript_217639;Transcript_223103;Transcript_223781;Transcript_230407;Transcript_230735;Transcript_233798;Transcript_241831
GO:0003995	F:acyl-CoA_dehydrogenase_activity	8	0.309922	Transcript_018364;Transcript_032053;Transcript_046517;Transcript_053296;Transcript_160763;Transcript_192035;Transcript_234669;Transcript_242645
GO:0033386	P:geranylgeranyl_diphosphate_biosynthetic_process	4	0.79695	Transcript_023190;Transcript_047414;Transcript_138015;Transcript_213310
GO:0033281	C:TAT_protein_transport_complex	5	0.240732	Transcript_005893;Transcript_025324;Transcript_047240;Transcript_076266;Transcript_228071
GO:1901038	P:cyanidin_3-O-glucoside_metabolic_process	2	0.406345	Transcript_009214;Transcript_165735
GO:0048481	P:ovule_development	25	0.0067601	Transcript_003093;Transcript_006567;Transcript_007259;Transcript_007914;Transcript_015080;Transcript_018261;Transcript_036070;Transcript_041782;Transcript_043973;Transcript_045248;Transcript_062654;Transcript_062791;Transcript_078006;Transcript_113130;Transcript_125255;Transcript_139997;Transcript_159838;Transcript_173042;Transcript_206425;Transcript_222274;Transcript_223551;Transcript_230857;Tra…
GO:0097238	P:cellular_response_to_methylglyoxal	2	0.154885	Transcript_043848;Transcript_225871
GO:0032266	F:phosphatidylinositol-3-phosphate_binding	4	0.0250591	Transcript_034564;Transcript_130774;Transcript_202796;Transcript_239319
GO:0035861	C:site_of_double-strand_break	2	0.595334	Transcript_170938;Transcript_243895
GO:0071219	P:cellular_response_to_molecule_of_bacterial_origin	2	0.595334	Transcript_190220;Transcript_237868
GO:0016442	C:RISC_complex	2	0.00022486	Transcript_000262;Transcript_124826
GO:0031100	P:organ_regeneration	2	1	Transcript_012262;Transcript_235160
GO:0010091	P:trichome_branching	13	9.35485e-05	Transcript_004518;Transcript_012058;Transcript_042368;Transcript_042492;Transcript_049149;Transcript_128702;Transcript_140282;Transcript_194155;Transcript_228291;Transcript_230064;Transcript_230367;Transcript_232000;Transcript_238113
GO:0033185	C:dolichol-phosphate-mannose_synthase_complex_	4	1	Transcript_020946;Transcript_023970;Transcript_031084;Transcript_235176
GO:0045182	F:translation_regulator_activity	3	0.645282	Transcript_007997;Transcript_069962;Transcript_224299
GO:0009678	F:hydrogen-translocating_pyrophosphatase_activity	4	0.27286	Transcript_025532;Transcript_028519;Transcript_156555;Transcript_184088
GO:0003904	F:deoxyribodipyrimidine_photo-lyase_activity	3	1	Transcript_020407;Transcript_030846;Transcript_232749
GO:0010098	P:suspensor_development	2	0.077373	Transcript_022653;Transcript_027827
GO:0010115	P:regulation_of_abscisic_acid_biosynthetic_process	2	1	Transcript_157183;Transcript_227862
GO:0005669	C:transcription_factor_TFIID_complex	7	0.0971538	Transcript_007576;Transcript_043536;Transcript_054599;Transcript_065443;Transcript_081822;Transcript_196132;Transcript_204709
GO:0046777	P:protein_autophosphorylation	214	8.9223e-29	Transcript_000361;Transcript_002815;Transcript_003470;Transcript_004137;Transcript_004406;Transcript_006747;Transcript_006813;Transcript_006997;Transcript_007730;Transcript_007871;Transcript_007873;Transcript_008282;Transcript_008894;Transcript_009319;Transcript_009893;Transcript_010355;Transcript_010393;Transcript_011252;Transcript_013070;Transcript_013533;Transcript_014113;Transcript_014265;Tra…
GO:0010072	P:primary_shoot_apical_meristem_specification	7	0.0232054	Transcript_027964;Transcript_168089;Transcript_178083;Transcript_186835;Transcript_221798;Transcript_244041;Transcript_244837
GO:0004340	F:glucokinase_activity	3	0.25427	Transcript_012876;Transcript_243959;Transcript_244394
GO:0004588	F:orotate_phosphoribosyltransferase_activity_	2	0.776635	Transcript_014669;Transcript_219996
GO:0006629	P:lipid_metabolic_process	36	1.73983e-11	Transcript_004742;Transcript_011264;Transcript_018183;Transcript_021167;Transcript_021640;Transcript_024035;Transcript_027546;Transcript_029499;Transcript_032053;Transcript_033454;Transcript_035390;Transcript_037769;Transcript_039564;Transcript_039926;Transcript_043175;Transcript_049830;Transcript_057145;Transcript_058575;Transcript_092265;Transcript_095376;Transcript_096690;Transcript_147082;Tra…
GO:0071108	P:protein_K48-linked_deubiquitination	2	0.190669	Transcript_032559;Transcript_198030
GO:0051321	P:meiotic_cell_cycle	12	0.0397432	Transcript_012092;Transcript_017363;Transcript_029771;Transcript_087535;Transcript_096279;Transcript_102558;Transcript_119105;Transcript_144208;Transcript_196412;Transcript_230953;Transcript_243448;Transcript_244855
GO:0045491	P:xylan_metabolic_process	5	0.810889	Transcript_068892;Transcript_175212;Transcript_198152;Transcript_235440;Transcript_239148
ko00052	Galactose_metabolism	47	0.00769829	Transcript_002622;Transcript_003205;Transcript_005053;Transcript_007324;Transcript_007704;Transcript_008105;Transcript_012876;Transcript_014026;Transcript_014555;Transcript_022215;Transcript_027282;Transcript_041369;Transcript_042952;Transcript_043532;Transcript_043848;Transcript_044928;Transcript_048427;Transcript_055288;Transcript_075145;Transcript_078007;Transcript_097280;Transcript_130443;Tra…
ko03410	Base_excision_repair	18	0.00349059	Transcript_000135;Transcript_023059;Transcript_049632;Transcript_085990;Transcript_095546;Transcript_117629;Transcript_142487;Transcript_143674;Transcript_151621;Transcript_167757;Transcript_188242;Transcript_197824;Transcript_223843;Transcript_228204;Transcript_231438;Transcript_237367;Transcript_240046;Transcript_241156
GO:0005543	F:phospholipid_binding	28	0.0671482	Transcript_012756;Transcript_012922;Transcript_016519;Transcript_020976;Transcript_025379;Transcript_026394;Transcript_036529;Transcript_049761;Transcript_056853;Transcript_070949;Transcript_071723;Transcript_083792;Transcript_092229;Transcript_118601;Transcript_146660;Transcript_154590;Transcript_158953;Transcript_159476;Transcript_160717;Transcript_166445;Transcript_179407;Transcript_199562;Tra…
GO:0006954	P:inflammatory_response	12	0.690074	Transcript_003866;Transcript_098425;Transcript_120546;Transcript_155875;Transcript_226420;Transcript_231033;Transcript_231455;Transcript_233435;Transcript_236553;Transcript_239360;Transcript_243110;Transcript_244101
GO:0004518	F:nuclease_activity	12	0.0318903	Transcript_014274;Transcript_031972;Transcript_037997;Transcript_044145;Transcript_078104;Transcript_118370;Transcript_132258;Transcript_163278;Transcript_178897;Transcript_217315;Transcript_226728;Transcript_238948
GO:0003999	F:adenine_phosphoribosyltransferase_activity	2	0.256238	Transcript_030611;Transcript_113688
GO:0005089	F:Rho_guanyl-nucleotide_exchange_factor_activity	8	0.0880935	Transcript_006247;Transcript_042002;Transcript_151830;Transcript_178803;Transcript_230300;Transcript_236832;Transcript_238595;Transcript_242160
GO:0005783	C:endoplasmic_reticulum_	303	3.98221e-40	Transcript_000081;Transcript_001072;Transcript_001104;Transcript_001319;Transcript_002047;Transcript_002621;Transcript_003076;Transcript_003891;Transcript_005751;Transcript_006266;Transcript_006281;Transcript_007083;Transcript_007163;Transcript_007800;Transcript_008158;Transcript_008316;Transcript_008375;Transcript_008597;Transcript_009590;Transcript_009933;Transcript_010111;Transcript_011802;Tra…
GO:0016274	F:protein-arginine_N-methyltransferase_activity	2	1	Transcript_014508;Transcript_200038
GO:1902802	P:regulation_of_heterochromatin_domain_assembly	2	0.154885	Transcript_030389;Transcript_230188
GO:0043065	P:positive_regulation_of_apoptotic_process	8	0.034798	Transcript_004696;Transcript_006795;Transcript_054853;Transcript_087523;Transcript_124057;Transcript_199561;Transcript_204893;Transcript_236631
ko04111	Cell_cycle_-_yeast	44	1.40056e-07	Transcript_006445;Transcript_007259;Transcript_008465;Transcript_008964;Transcript_011213;Transcript_015977;Transcript_017223;Transcript_017900;Transcript_022136;Transcript_025560;Transcript_026483;Transcript_047526;Transcript_062654;Transcript_074050;Transcript_089065;Transcript_097747;Transcript_103584;Transcript_110057;Transcript_112208;Transcript_116715;Transcript_117496;Transcript_126973;Tra…
GO:0004590	F:orotidine-5'-phosphate_decarboxylase_activity	2	0.776635	Transcript_014669;Transcript_219996
GO:0010042	P:response_to_manganese_ion	2	0.776635	Transcript_087523;Transcript_214295
ko00626	Naphthalene_degradation	5	0.300018	Transcript_030584;Transcript_090011;Transcript_111081;Transcript_228968;Transcript_242401
GO:0031616	C:spindle_pole_centrosome	3	0.393222	Transcript_028330;Transcript_137349;Transcript_223939
GO:1901800	P:positive_regulation_of_proteasomal_protein_catabolic_process	5	0.0184647	Transcript_070040;Transcript_226246;Transcript_233934;Transcript_234735;Transcript_240819
GO:0050995	P:negative_regulation_of_lipid_catabolic_process	2	0.695033	Transcript_029499;Transcript_183236
GO:0030026	P:cellular_manganese_ion_homeostasis	2	0.190669	Transcript_214295;Transcript_235245
GO:0060416	P:response_to_growth_hormone	3	0.471648	Transcript_034880;Transcript_166714;Transcript_209211
GO:0016618	F:hydroxypyruvate_reductase_activity	2	0.256238	Transcript_192739;Transcript_230201
GO:0007034	P:vacuolar_transport	13	0.00118672	Transcript_024674;Transcript_025114;Transcript_089471;Transcript_103108;Transcript_116532;Transcript_191930;Transcript_197855;Transcript_199536;Transcript_205682;Transcript_222916;Transcript_235957;Transcript_240915;Transcript_244654
GO:0010617	P:circadian_regulation_of_calcium_ion_oscillation	2	1	Transcript_016768;Transcript_233547
GO:0042098	P:T_cell_proliferation	2	0.695033	Transcript_020722;Transcript_230725
GO:0060187	C:cell_pole_	2	0.595334	Transcript_002621;Transcript_041161
GO:0008307	F:structural_constituent_of_muscle	3	0.179749	Transcript_224851;Transcript_230454;Transcript_239972
GO:0042826	F:histone_deacetylase_binding	2	0.0565074	Transcript_068956;Transcript_199136
ko04961	Endocrine_and_other_factor-regulated_calcium_reabsorption	12	0.00248745	Transcript_007264;Transcript_015912;Transcript_027502;Transcript_034972;Transcript_130458;Transcript_131949;Transcript_135745;Transcript_143060;Transcript_163934;Transcript_190628;Transcript_221927;Transcript_242101
ko04020	Calcium_signaling_pathway	22	1.77679e-05	Transcript_010012;Transcript_012094;Transcript_018125;Transcript_024036;Transcript_059039;Transcript_067433;Transcript_089910;Transcript_092873;Transcript_098464;Transcript_107188;Transcript_140517;Transcript_154268;Transcript_169520;Transcript_174975;Transcript_175126;Transcript_222162;Transcript_232362;Transcript_234034;Transcript_235589;Transcript_236155;Transcript_237456;Transcript_241854
GO:0034051	P:negative_regulation_of_plant-type_hypersensitive_response	3	0.527991	Transcript_021943;Transcript_043306;Transcript_239419
GO:0010862	P:positive_regulation_of_pathway-restricted_SMAD_protein_phosphorylation	2	0.281171	Transcript_234875;Transcript_240700
GO:0052325	P:cell_wall_pectin_biosynthetic_process	5	0.115629	Transcript_007622;Transcript_023061;Transcript_084346;Transcript_088489;Transcript_167659
GO:0048513	P:organ_development	7	0.235393	Transcript_068498;Transcript_132196;Transcript_150712;Transcript_165067;Transcript_188203;Transcript_192981;Transcript_226228
GO:0006596	P:polyamine_biosynthetic_process	5	0.304333	Transcript_045970;Transcript_062668;Transcript_086222;Transcript_097155;Transcript_234525
GO:0002539	P:prostaglandin_production_involved_in_inflammatory_response	2	0.406345	Transcript_239360;Transcript_243110
GO:0006464	P:cellular_protein_modification_process	6	0.0137873	Transcript_025019;Transcript_062768;Transcript_152485;Transcript_235663;Transcript_235705;Transcript_236619
GO:0005674	C:transcription_factor_TFIIF_complex	3	0.527991	Transcript_023060;Transcript_041304;Transcript_233266
GO:0006283	P:transcription-coupled_nucleotide-excision_repair	4	0.268461	Transcript_029815;Transcript_049751;Transcript_142487;Transcript_153412
GO:0010628	P:positive_regulation_of_gene_expression	11	0.0180123	Transcript_003866;Transcript_098425;Transcript_100904;Transcript_120546;Transcript_155875;Transcript_175431;Transcript_231033;Transcript_231455;Transcript_231824;Transcript_233435;Transcript_242736
GO:0008143	F:poly(A)_binding	9	0.000941692	Transcript_003145;Transcript_023930;Transcript_025810;Transcript_026764;Transcript_085785;Transcript_171158;Transcript_195257;Transcript_240700;Transcript_240874
GO:1990206	F:jasmonyl-Ile_conjugate_hydrolase_activity_	3	0.471648	Transcript_014269;Transcript_224884;Transcript_244416
GO:0060560	P:developmental_growth_involved_in_morphogenesis	2	0.695033	Transcript_020976;Transcript_237103
GO:0045169	C:fusome	6	1	Transcript_002621;Transcript_026391;Transcript_041161;Transcript_149814;Transcript_151249;Transcript_188629
GO:0004535	F:poly(A)-specific_ribonuclease_activity	12	0.0397432	Transcript_000025;Transcript_009730;Transcript_012930;Transcript_018807;Transcript_021949;Transcript_220365;Transcript_227137;Transcript_227164;Transcript_232602;Transcript_235484;Transcript_237727;Transcript_244780
GO:0036111	P:very_long-chain_fatty-acyl-CoA_metabolic_process	2	0.281171	Transcript_186294;Transcript_206123
GO:0009925	C:basal_plasma_membrane_	6	0.829894	Transcript_019690;Transcript_089411;Transcript_151256;Transcript_160420;Transcript_186370;Transcript_205465
GO:0052096	P:formation_by_symbiont_of_syncytium_involving_giant_cell_for_nutrient_acquisition_from_host	2	0.343054	Transcript_019884;Transcript_043358
GO:0031090	C:organelle_membrane	5	0.0538564	Transcript_057518;Transcript_127316;Transcript_191392;Transcript_231720;Transcript_233571
GO:0017006	P:protein-tetrapyrrole_linkage	4	0.825415	Transcript_017666;Transcript_026115;Transcript_109012;Transcript_167323
GO:0004144	F:diacylglycerol_O-acyltransferase_activity	9	0.329796	Transcript_018618;Transcript_021772;Transcript_024354;Transcript_030182;Transcript_044805;Transcript_056106;Transcript_163791;Transcript_167859;Transcript_243834
GO:0010541	P:acropetal_auxin_transport	12	0.193748	Transcript_032581;Transcript_036881;Transcript_059532;Transcript_124083;Transcript_148175;Transcript_150662;Transcript_151834;Transcript_186151;Transcript_222312;Transcript_234332;Transcript_235363;Transcript_237078
GO:0004450	F:isocitrate_dehydrogenase_(NADP+)_activity	3	0.303101	Transcript_016804;Transcript_042399;Transcript_043070
GO:0046686	P:response_to_cadmium_ion	97	5.68436e-20	Transcript_000114;Transcript_001012;Transcript_006675;Transcript_008147;Transcript_009143;Transcript_011203;Transcript_011264;Transcript_015894;Transcript_016257;Transcript_016709;Transcript_016940;Transcript_018541;Transcript_018756;Transcript_019000;Transcript_022136;Transcript_022279;Transcript_022974;Transcript_028117;Transcript_029193;Transcript_030830;Transcript_033454;Transcript_035390;Tra…
GO:0045132	P:meiotic_chromosome_segregation	2	1	Transcript_020142;Transcript_163580
GO:0098655	P:cation_transmembrane_transport	19	0.911238	Transcript_007741;Transcript_009968;Transcript_015153;Transcript_015491;Transcript_023143;Transcript_024948;Transcript_029355;Transcript_062378;Transcript_063696;Transcript_103108;Transcript_106913;Transcript_133216;Transcript_171319;Transcript_201742;Transcript_202986;Transcript_228469;Transcript_231136;Transcript_236224;Transcript_242815
GO:0030295	F:protein_kinase_activator_activity	2	0.0412318	Transcript_041259;Transcript_144326
GO:0006574	P:valine_catabolic_process	3	0.303101	Transcript_021635;Transcript_149539;Transcript_236931
GO:0032212	P:positive_regulation_of_telomere_maintenance_via_telomerase	2	0.695033	Transcript_200275;Transcript_215242
GO:0010623	P:developmental_programmed_cell_death	2	1	Transcript_153902;Transcript_175518
GO:0019287	P:isopentenyl_diphosphate_biosynthetic_process,_mevalonate_pathway	5	0.0323053	Transcript_018717;Transcript_153316;Transcript_217321;Transcript_226581;Transcript_230167
GO:0000271	P:polysaccharide_biosynthetic_process	3	0.645282	Transcript_175920;Transcript_205685;Transcript_229566
GO:0008320	F:protein_transmembrane_transporter_activity	6	0.169485	Transcript_014498;Transcript_025324;Transcript_044153;Transcript_047240;Transcript_120658;Transcript_228071
GO:0022904	P:respiratory_electron_transport_chain	4	0.00434841	Transcript_071197;Transcript_122095;Transcript_183007;Transcript_228909
GO:0006613	P:cotranslational_protein_targeting_to_membrane	4	0.159854	Transcript_062783;Transcript_100318;Transcript_181957;Transcript_242914
GO:0051017	P:actin_filament_bundle_assembly	4	1.51231e-05	Transcript_007130;Transcript_009570;Transcript_016963;Transcript_230892
GO:0051745	F:4-hydroxy-3-methylbut-2-en-1-yl_diphosphate_reductase_activity	4	0.671724	Transcript_042987;Transcript_060657;Transcript_153355;Transcript_194521
GO:0043630	P:ncRNA_polyadenylation_involved_in_polyadenylation-dependent_ncRNA_catabolic_process	2	0.154885	Transcript_030389;Transcript_230188
ko05145	Toxoplasmosis	33	0.0056175	Transcript_002794;Transcript_005989;Transcript_009893;Transcript_015593;Transcript_016356;Transcript_020078;Transcript_022223;Transcript_022279;Transcript_028717;Transcript_043131;Transcript_043763;Transcript_047026;Transcript_069212;Transcript_072106;Transcript_083080;Transcript_094076;Transcript_154124;Transcript_156445;Transcript_161459;Transcript_164812;Transcript_170584;Transcript_183936;Tra…
GO:0030670	C:phagocytic_vesicle_membrane	4	0.27286	Transcript_017876;Transcript_093222;Transcript_173643;Transcript_235041
GO:0042765	C:GPI-anchor_transamidase_complex_	2	0.776635	Transcript_012503;Transcript_224137
GO:0004519	F:endonuclease_activity	42	1.58579e-08	Transcript_008366;Transcript_009058;Transcript_017363;Transcript_019168;Transcript_024256;Transcript_024865;Transcript_029074;Transcript_030478;Transcript_049116;Transcript_060977;Transcript_069286;Transcript_080023;Transcript_099886;Transcript_130853;Transcript_142642;Transcript_144762;Transcript_150625;Transcript_159267;Transcript_171266;Transcript_173644;Transcript_174927;Transcript_175364;Tra…
GO:0051897	P:positive_regulation_of_protein_kinase_B_signaling	3	1	Transcript_006795;Transcript_114233;Transcript_226420
GO:0008637	P:apoptotic_mitochondrial_changes	2	0.190669	Transcript_017841;Transcript_107188
GO:0043546	F:molybdopterin_cofactor_binding	4	1	Transcript_171926;Transcript_224732;Transcript_237637;Transcript_243855
GO:0000272	P:polysaccharide_catabolic_process	19	0.172173	Transcript_021548;Transcript_024035;Transcript_027899;Transcript_029090;Transcript_032979;Transcript_043311;Transcript_077638;Transcript_096837;Transcript_149601;Transcript_155035;Transcript_158450;Transcript_162281;Transcript_162817;Transcript_176652;Transcript_203038;Transcript_212165;Transcript_217493;Transcript_224207;Transcript_229750
GO:0071782	C:endoplasmic_reticulum_tubular_network	3	0.0129099	Transcript_033420;Transcript_223565;Transcript_243845
GO:0003862	F:3-isopropylmalate_dehydrogenase_activity	4	1	Transcript_098609;Transcript_169815;Transcript_201132;Transcript_225154
GO:0015180	F:L-alanine_transmembrane_transporter_activity	4	0.671724	Transcript_009968;Transcript_161004;Transcript_201742;Transcript_236224
GO:0008199	F:ferric_iron_binding	6	0.0652015	Transcript_028064;Transcript_030702;Transcript_034761;Transcript_100725;Transcript_105247;Transcript_226341
ko00510	N-Glycan_biosynthesis	26	1.53989e-05	Transcript_001072;Transcript_010111;Transcript_013219;Transcript_020755;Transcript_020946;Transcript_023532;Transcript_023970;Transcript_030985;Transcript_031084;Transcript_047963;Transcript_063100;Transcript_065733;Transcript_082760;Transcript_091788;Transcript_133277;Transcript_158716;Transcript_188406;Transcript_196073;Transcript_199962;Transcript_226093;Transcript_227688;Transcript_231289;Tra…
GO:0005840	C:ribosome_	197	1.19203e-26	Transcript_000250;Transcript_000260;Transcript_000373;Transcript_000399;Transcript_001111;Transcript_002363;Transcript_004690;Transcript_005041;Transcript_006817;Transcript_006969;Transcript_007649;Transcript_009487;Transcript_010845;Transcript_012128;Transcript_012657;Transcript_013242;Transcript_013758;Transcript_013859;Transcript_014241;Transcript_014879;Transcript_015293;Transcript_016218;Tra…
GO:0036092	P:phosphatidylinositol-3-phosphate_biosynthetic_process	7	0.42938	Transcript_006855;Transcript_035544;Transcript_080546;Transcript_093969;Transcript_161484;Transcript_225318;Transcript_242674
GO:0051762	P:sesquiterpene_biosynthetic_process	4	0.316916	Transcript_032229;Transcript_178720;Transcript_223679;Transcript_236114
GO:0051010	F:microtubule_plus-end_binding	2	0.602246	Transcript_191113;Transcript_236936
GO:0009558	P:embryo_sac_cellularization	3	0.639444	Transcript_015265;Transcript_062906;Transcript_173748
ko05410	Hypertrophic_cardiomyopathy_(HCM)	5	0.0139338	Transcript_009220;Transcript_045110;Transcript_205700;Transcript_236082;Transcript_243916
GO:0016747	F:transferase_activity,_transferring_acyl_groups_other_than_amino-acyl_groups	11	0.0111512	Transcript_005758;Transcript_009213;Transcript_009361;Transcript_018235;Transcript_050191;Transcript_140231;Transcript_153147;Transcript_155818;Transcript_163387;Transcript_192653;Transcript_239208
GO:0031532	P:actin_cytoskeleton_reorganization	2	0.456579	Transcript_143707;Transcript_226693
GO:0000165	P:MAPK_cascade	19	0.0205658	Transcript_005159;Transcript_009323;Transcript_013885;Transcript_024829;Transcript_025365;Transcript_032009;Transcript_033023;Transcript_033141;Transcript_080417;Transcript_130283;Transcript_145272;Transcript_184641;Transcript_198758;Transcript_200984;Transcript_220369;Transcript_223900;Transcript_225061;Transcript_230080;Transcript_240826
ko04066	HIF-1_signaling_pathway	27	0.000508206	Transcript_002074;Transcript_002622;Transcript_010009;Transcript_012876;Transcript_014026;Transcript_021556;Transcript_024575;Transcript_033023;Transcript_046693;Transcript_053730;Transcript_072106;Transcript_072674;Transcript_098438;Transcript_149141;Transcript_154258;Transcript_154675;Transcript_206891;Transcript_223883;Transcript_223900;Transcript_225466;Transcript_230696;Transcript_230739;Tra…
ko00281	Geraniol_degradation	3	0.645282	Transcript_211291;Transcript_221820;Transcript_228449
GO:0009750	P:response_to_fructose	6	0.0520104	Transcript_077883;Transcript_134461;Transcript_136272;Transcript_232397;Transcript_233405;Transcript_233522
GO:0047631	F:ADP-ribose_diphosphatase_activity_	4	0.0242358	Transcript_038979;Transcript_111675;Transcript_229547;Transcript_232603
GO:0048571	P:long-day_photoperiodism	3	1	Transcript_227824;Transcript_229192;Transcript_238925
GO:0019441	P:tryptophan_catabolic_process_to_kynurenine	5	0.696697	Transcript_019596;Transcript_021436;Transcript_075480;Transcript_113695;Transcript_235291
GO:0048599	P:oocyte_development	2	0.695033	Transcript_023930;Transcript_032961
GO:0043572	P:plastid_fission	3	0.527991	Transcript_001527;Transcript_044704;Transcript_225647
GO:0008327	F:methyl-CpG_binding	8	0.168987	Transcript_018951;Transcript_102940;Transcript_126726;Transcript_222854;Transcript_241343;Transcript_242644;Transcript_243218;Transcript_244509
GO:0016272	C:prefoldin_complex	9	0.332784	Transcript_003203;Transcript_003556;Transcript_006848;Transcript_042415;Transcript_043187;Transcript_054829;Transcript_112192;Transcript_233429;Transcript_235844
GO:0044030	P:regulation_of_DNA_methylation	3	0.135649	Transcript_021440;Transcript_027836;Transcript_083651
GO:0004620	F:phospholipase_activity	5	0.0426106	Transcript_033896;Transcript_107235;Transcript_121363;Transcript_146875;Transcript_205939
GO:0006474	P:N-terminal_protein_amino_acid_acetylation	11	0.62961	Transcript_004148;Transcript_011202;Transcript_028397;Transcript_044323;Transcript_049824;Transcript_050549;Transcript_182066;Transcript_188455;Transcript_236570;Transcript_236593;Transcript_237265
GO:0006767	P:water-soluble_vitamin_metabolic_process	4	0.563109	Transcript_018859;Transcript_036692;Transcript_127755;Transcript_155159
GO:0009308	P:amine_metabolic_process	10	0.0912588	Transcript_007347;Transcript_017325;Transcript_032884;Transcript_039697;Transcript_158955;Transcript_177018;Transcript_195860;Transcript_197557;Transcript_222613;Transcript_231590
GO:0000749	P:response_to_pheromone_involved_in_conjugation_with_cellular_fusion	2	0.456579	Transcript_199090;Transcript_236405
GO:0071369	P:cellular_response_to_ethylene_stimulus	3	0.639444	Transcript_002522;Transcript_122730;Transcript_159934
GO:0006855	P:drug_transmembrane_transport	4	0.27286	Transcript_027194;Transcript_114532;Transcript_169458;Transcript_237078
GO:0006986	P:response_to_unfolded_protein	6	0.327925	Transcript_001072;Transcript_138761;Transcript_151127;Transcript_226955;Transcript_240246;Transcript_243902
GO:0006635	P:fatty_acid_beta-oxidation	18	0.00022541	Transcript_018364;Transcript_021257;Transcript_028661;Transcript_043648;Transcript_053296;Transcript_106329;Transcript_152491;Transcript_160763;Transcript_175002;Transcript_186294;Transcript_187781;Transcript_195872;Transcript_206123;Transcript_221820;Transcript_228449;Transcript_234669;Transcript_235812;Transcript_242645
GO:0031597	C:cytosolic_proteasome_complex_	4	0.00171038	Transcript_070040;Transcript_233934;Transcript_234735;Transcript_240819
GO:0005802	C:trans-Golgi_network	139	3.57775e-18	Transcript_002026;Transcript_003758;Transcript_005595;Transcript_005880;Transcript_006193;Transcript_007379;Transcript_008292;Transcript_008404;Transcript_009608;Transcript_010111;Transcript_010173;Transcript_010967;Transcript_013262;Transcript_014046;Transcript_015307;Transcript_016091;Transcript_017876;Transcript_018246;Transcript_018449;Transcript_020376;Transcript_020976;Transcript_022581;Tra…
GO:0015798	P:myo-inositol_transport	2	0.19603	Transcript_005717;Transcript_191499
GO:1990342	C:heterochromatin_island_	2	0.154885	Transcript_030389;Transcript_230188
GO:0004825	F:methionine-tRNA_ligase_activity	2	0.256238	Transcript_018756;Transcript_030797
GO:0003968	F:RNA-directed_RNA_polymerase_activity	12	0.520868	Transcript_021363;Transcript_040070;Transcript_041571;Transcript_049728;Transcript_095268;Transcript_096051;Transcript_149903;Transcript_151365;Transcript_163678;Transcript_165311;Transcript_199141;Transcript_225343
GO:0031305	C:integral_component_of_mitochondrial_inner_membrane_	2	0.406345	Transcript_137168;Transcript_232439
GO:0007067	P:mitotic_nuclear_division	61	7.37312e-13	Transcript_006445;Transcript_007259;Transcript_008465;Transcript_008964;Transcript_017235;Transcript_019884;Transcript_020579;Transcript_023059;Transcript_023949;Transcript_026483;Transcript_027500;Transcript_029875;Transcript_037768;Transcript_042816;Transcript_042831;Transcript_043358;Transcript_044004;Transcript_047488;Transcript_047526;Transcript_062654;Transcript_078438;Transcript_089065;Tra…
GO:0009554	P:megasporogenesis	4	0.433453	Transcript_011213;Transcript_025560;Transcript_078006;Transcript_241227
GO:0009058	P:biosynthetic_process	22	9.46283e-05	Transcript_015423;Transcript_021848;Transcript_029473;Transcript_031854;Transcript_034074;Transcript_034831;Transcript_041969;Transcript_094240;Transcript_095065;Transcript_105082;Transcript_128925;Transcript_150787;Transcript_157333;Transcript_169532;Transcript_171389;Transcript_172453;Transcript_192163;Transcript_222132;Transcript_222398;Transcript_229669;Transcript_243069;Transcript_243550
GO:2000028	P:regulation_of_photoperiodism,_flowering	3	0.0793094	Transcript_003321;Transcript_224231;Transcript_242565
GO:0016615	F:malate_dehydrogenase_activity	2	0.406345	Transcript_223155;Transcript_237545
ko00020	Citrate_cycle_(TCA_cycle)	54	4.79843e-05	Transcript_001574;Transcript_002074;Transcript_006928;Transcript_014353;Transcript_014643;Transcript_016804;Transcript_021556;Transcript_023212;Transcript_024584;Transcript_026348;Transcript_040821;Transcript_041807;Transcript_042399;Transcript_043070;Transcript_053448;Transcript_078929;Transcript_082809;Transcript_084580;Transcript_085286;Transcript_087227;Transcript_096690;Transcript_097665;Tra…
GO:0019395	P:fatty_acid_oxidation	2	1	Transcript_032053;Transcript_192035
GO:0019825	F:oxygen_binding	2	0.190669	Transcript_224936;Transcript_243572
GO:0010492	P:maintenance_of_shoot_apical_meristem_identity	4	0.000194922	Transcript_000262;Transcript_018145;Transcript_150050;Transcript_207218
GO:0005905	C:coated_pit_	15	6.98925e-05	Transcript_015912;Transcript_026408;Transcript_030232;Transcript_030500;Transcript_042508;Transcript_044305;Transcript_045560;Transcript_079019;Transcript_161356;Transcript_171440;Transcript_173049;Transcript_173572;Transcript_183936;Transcript_221927;Transcript_243579
GO:0009615	P:response_to_virus	14	0.000151266	Transcript_004543;Transcript_029473;Transcript_068956;Transcript_077480;Transcript_155690;Transcript_161784;Transcript_170584;Transcript_191404;Transcript_192410;Transcript_199136;Transcript_224690;Transcript_228710;Transcript_231427;Transcript_232616
GO:0016762	F:xyloglucan:xyloglucosyl_transferase_activity	16	0.00509552	Transcript_001808;Transcript_012139;Transcript_022755;Transcript_031473;Transcript_037091;Transcript_044605;Transcript_101298;Transcript_113189;Transcript_116289;Transcript_135210;Transcript_154111;Transcript_185437;Transcript_208814;Transcript_238561;Transcript_241622;Transcript_242133
GO:0015120	F:phosphoglycerate_transmembrane_transporter_activity	5	1	Transcript_041661;Transcript_129426;Transcript_169940;Transcript_222145;Transcript_242666
GO:0003700	F:sequence-specific_DNA_binding_transcription_factor_activity	433	8.9527e-52	Transcript_000274;Transcript_000919;Transcript_001687;Transcript_002459;Transcript_002637;Transcript_002711;Transcript_002958;Transcript_003477;Transcript_003554;Transcript_004195;Transcript_004402;Transcript_004543;Transcript_004860;Transcript_004957;Transcript_005350;Transcript_005569;Transcript_006181;Transcript_006567;Transcript_007195;Transcript_007218;Transcript_007386;Transcript_007511;Tra…
GO:0033993	P:response_to_lipid	3	1	Transcript_012922;Transcript_014861;Transcript_142487
GO:0080088	P:spermidine_hydroxycinnamate_conjugate_biosynthetic_process	9	0.326959	Transcript_006017;Transcript_017645;Transcript_057799;Transcript_078594;Transcript_100864;Transcript_169290;Transcript_220227;Transcript_233355;Transcript_243266
GO:0048529	F:magnesium-protoporphyrin_IX_monomethyl_ester_(oxidative)_cyclase_activity	3	0.639444	Transcript_026572;Transcript_047225;Transcript_185821
GO:0032049	P:cardiolipin_biosynthetic_process	5	1	Transcript_000605;Transcript_027976;Transcript_029289;Transcript_232439;Transcript_239699
GO:0006542	P:glutamine_biosynthetic_process	7	0.518864	Transcript_018746;Transcript_029397;Transcript_052921;Transcript_152779;Transcript_159737;Transcript_175856;Transcript_193635
ko04390	Hippo_signaling_pathway	27	0.0080758	Transcript_004137;Transcript_007158;Transcript_009220;Transcript_011213;Transcript_013342;Transcript_013798;Transcript_015369;Transcript_025199;Transcript_025560;Transcript_027757;Transcript_032232;Transcript_037855;Transcript_069519;Transcript_087729;Transcript_107816;Transcript_131067;Transcript_133924;Transcript_172586;Transcript_184912;Transcript_186849;Transcript_222069;Transcript_222223;Tra…
GO:0033926	F:glycopeptide_alpha-N-acetylgalactosaminidase_activity	4	0.0102776	Transcript_080514;Transcript_087490;Transcript_197971;Transcript_199971
GO:0003713	F:transcription_coactivator_activity	19	0.0438346	Transcript_009114;Transcript_038194;Transcript_043536;Transcript_068885;Transcript_081822;Transcript_182959;Transcript_204709;Transcript_210454;Transcript_222174;Transcript_222710;Transcript_225125;Transcript_227860;Transcript_228306;Transcript_230027;Transcript_231597;Transcript_234730;Transcript_238865;Transcript_240700;Transcript_243165
GO:0004644	F:phosphoribosylglycinamide_formyltransferase_activity	2	1	Transcript_010202;Transcript_201923
GO:0016203	P:muscle_attachment	2	0.14426	Transcript_230454;Transcript_239972
GO:0016605	C:PML_body	8	1	Transcript_004615;Transcript_012934;Transcript_032972;Transcript_035784;Transcript_112814;Transcript_222654;Transcript_233679;Transcript_241862
GO:0080129	P:proteasome_core_complex_assembly	2	0.406345	Transcript_041745;Transcript_172472
GO:0022626	C:cytosolic_ribosome	90	1.49274e-06	Transcript_002218;Transcript_004360;Transcript_005881;Transcript_006675;Transcript_007166;Transcript_008453;Transcript_009546;Transcript_011202;Transcript_012072;Transcript_014005;Transcript_014993;Transcript_016190;Transcript_017714;Transcript_018304;Transcript_019513;Transcript_026269;Transcript_028397;Transcript_030395;Transcript_033859;Transcript_036833;Transcript_038464;Transcript_039434;Tra…
GO:0000814	C:ESCRT_II_complex_	2	0.595334	Transcript_184303;Transcript_227806
GO:0009620	P:response_to_fungus	21	6.13117e-05	Transcript_029473;Transcript_042145;Transcript_042637;Transcript_043940;Transcript_043973;Transcript_044262;Transcript_046988;Transcript_048938;Transcript_053296;Transcript_080417;Transcript_085304;Transcript_105037;Transcript_113284;Transcript_145272;Transcript_155035;Transcript_204125;Transcript_230696;Transcript_230857;Transcript_234669;Transcript_240331;Transcript_242771
GO:0004559	F:alpha-mannosidase_activity	4	0.00565404	Transcript_010111;Transcript_022804;Transcript_232228;Transcript_235663
GO:0050373	F:UDP-arabinose_4-epimerase_activity	2	0.077373	Transcript_232274;Transcript_232368
GO:0046473	P:phosphatidic_acid_metabolic_process	2	0.776635	Transcript_181202;Transcript_238053
GO:0043388	P:positive_regulation_of_DNA_binding	2	0.776635	Transcript_025620;Transcript_236047
GO:2000114	P:regulation_of_establishment_of_cell_polarity	2	0.776635	Transcript_231717;Transcript_242034
GO:0006275	P:regulation_of_DNA_replication	3	0.00377409	Transcript_023059;Transcript_080710;Transcript_225968
GO:0032968	P:positive_regulation_of_transcription_elongation_from_RNA_polymerase_II_promoter	10	0.292989	Transcript_014878;Transcript_023060;Transcript_026454;Transcript_041304;Transcript_141279;Transcript_199090;Transcript_206891;Transcript_230239;Transcript_233266;Transcript_236405
GO:0045332	P:phospholipid_translocation	3	0.135649	Transcript_010967;Transcript_120946;Transcript_133216
GO:0016157	F:sucrose_synthase_activity_	4	0.125711	Transcript_094240;Transcript_095065;Transcript_150787;Transcript_169532
GO:0006301	P:postreplication_repair	9	0.558452	Transcript_001505;Transcript_044011;Transcript_045036;Transcript_056491;Transcript_129249;Transcript_185446;Transcript_232917;Transcript_233890;Transcript_244443
GO:0045740	P:positive_regulation_of_DNA_replication	2	1	Transcript_142487;Transcript_166714
GO:0046323	P:glucose_import	10	0.000427408	Transcript_005717;Transcript_037099;Transcript_042078;Transcript_062194;Transcript_091344;Transcript_110733;Transcript_150379;Transcript_228898;Transcript_231756;Transcript_236357
ko04152	AMPK_signaling_pathway	57	1.51249e-07	Transcript_001724;Transcript_004823;Transcript_008169;Transcript_008863;Transcript_014718;Transcript_015593;Transcript_021496;Transcript_022357;Transcript_034088;Transcript_041949;Transcript_042128;Transcript_042466;Transcript_045110;Transcript_057809;Transcript_075145;Transcript_084504;Transcript_091277;Transcript_093222;Transcript_099656;Transcript_116101;Transcript_120798;Transcript_123465;Tra…
GO:0006624	P:vacuolar_protein_processing	3	0.506334	Transcript_020477;Transcript_027153;Transcript_231784
ko04360	Axon_guidance	31	0.077965	Transcript_004137;Transcript_006418;Transcript_010012;Transcript_012094;Transcript_013798;Transcript_017414;Transcript_019534;Transcript_021853;Transcript_043118;Transcript_058863;Transcript_059039;Transcript_072106;Transcript_090276;Transcript_092873;Transcript_150338;Transcript_150886;Transcript_162158;Transcript_172586;Transcript_196277;Transcript_207470;Transcript_223900;Transcript_224126;Tra…
GO:0030331	F:estrogen_receptor_binding	6	0.716775	Transcript_007955;Transcript_013502;Transcript_044013;Transcript_197185;Transcript_222281;Transcript_238865
GO:0010393	P:galacturonan_metabolic_process	4	0.27286	Transcript_042145;Transcript_042637;Transcript_085304;Transcript_105037
GO:0060439	P:trachea_morphogenesis	2	1	Transcript_062378;Transcript_202986
GO:0009231	P:riboflavin_biosynthetic_process	6	0.0107446	Transcript_101598;Transcript_147681;Transcript_154762;Transcript_167214;Transcript_204443;Transcript_227098
GO:0005796	C:Golgi_lumen	2	1	Transcript_010369;Transcript_026249
GO:0045900	P:negative_regulation_of_translational_elongation	2	1	Transcript_237857;Transcript_243643
GO:0071577	P:zinc_II_ion_transmembrane_transport	2	0.595334	Transcript_014827;Transcript_227333
GO:0005249	F:voltage-gated_potassium_channel_activity	11	0.0438104	Transcript_010340;Transcript_014534;Transcript_020718;Transcript_021235;Transcript_025134;Transcript_037156;Transcript_172598;Transcript_183322;Transcript_205186;Transcript_231162;Transcript_233542
GO:0004402	F:histone_acetyltransferase_activity	12	0.00118984	Transcript_012586;Transcript_021440;Transcript_032961;Transcript_043536;Transcript_081822;Transcript_095035;Transcript_127616;Transcript_198318;Transcript_204709;Transcript_212745;Transcript_242565;Transcript_244509
GO:0030516	P:regulation_of_axon_extension	2	1	Transcript_130699;Transcript_205205
GO:0051453	P:regulation_of_intracellular_pH	4	0.125711	Transcript_062315;Transcript_224754;Transcript_228463;Transcript_239532
GO:0047769	F:arogenate_dehydratase_activity	2	0.19603	Transcript_021564;Transcript_190091
GO:0009864	P:induced_systemic_resistance,_jasmonic_acid_mediated_signaling_pathway	6	0.0520104	Transcript_042344;Transcript_045444;Transcript_067318;Transcript_160054;Transcript_172493;Transcript_236419
GO:0001731	P:formation_of_translation_preinitiation_complex	22	0.00258327	Transcript_005862;Transcript_027137;Transcript_031078;Transcript_042090;Transcript_042480;Transcript_053540;Transcript_122362;Transcript_143419;Transcript_151486;Transcript_157065;Transcript_161069;Transcript_224747;Transcript_224887;Transcript_224892;Transcript_226346;Transcript_230763;Transcript_233021;Transcript_238376;Transcript_239262;Transcript_241862;Transcript_243256;Transcript_244379
ko01230	Biosynthesis_of_amino_acids	154	9.93551e-17	Transcript_000056;Transcript_000864;Transcript_001944;Transcript_002524;Transcript_002738;Transcript_007002;Transcript_008396;Transcript_008700;Transcript_009163;Transcript_010009;Transcript_011114;Transcript_011172;Transcript_011560;Transcript_011997;Transcript_012253;Transcript_013346;Transcript_014426;Transcript_014504;Transcript_014765;Transcript_015376;Transcript_015673;Transcript_015937;Tra…
GO:0015783	P:GDP-fucose_transport	7	0.621701	Transcript_024551;Transcript_061254;Transcript_090987;Transcript_156020;Transcript_215450;Transcript_235645;Transcript_236983
GO:0003960	F:NADPH:quinone_reductase_activity	2	0.456579	Transcript_102603;Transcript_227230
GO:0006887	P:exocytosis	32	1.40653e-07	Transcript_008138;Transcript_009045;Transcript_013464;Transcript_013800;Transcript_014710;Transcript_016337;Transcript_018740;Transcript_024980;Transcript_028208;Transcript_029288;Transcript_031584;Transcript_033374;Transcript_037553;Transcript_037921;Transcript_040172;Transcript_044493;Transcript_048938;Transcript_049860;Transcript_067280;Transcript_116279;Transcript_140399;Transcript_141668;Tra…
GO:0034388	C:Pwp2p-containing_subcomplex_of_90S_preribosome	6	1	Transcript_050447;Transcript_130699;Transcript_170854;Transcript_205205;Transcript_231531;Transcript_234911
GO:0090090	P:negative_regulation_of_canonical_Wnt_signaling_pathway	2	0.00455789	Transcript_172586;Transcript_225125
GO:0048194	P:Golgi_vesicle_budding	2	0.456579	Transcript_010967;Transcript_120946
GO:0009954	P:proximal/distal_pattern_formation	3	1	Transcript_028188;Transcript_042344;Transcript_236419
GO:0043541	C:UDP-N-acetylglucosamine_transferase_complex	2	0.695033	Transcript_047963;Transcript_133277
GO:0080048	F:GDP-D-glucose_phosphorylase_activity	3	0.0765394	Transcript_111529;Transcript_166916;Transcript_233591
ko00430	Taurine_and_hypotaurine_metabolism	4	0.0242358	Transcript_158353;Transcript_205557;Transcript_215175;Transcript_224393
GO:0016298	F:lipase_activity	13	0.00783944	Transcript_024304;Transcript_041988;Transcript_049647;Transcript_095376;Transcript_100361;Transcript_174845;Transcript_208944;Transcript_223155;Transcript_227282;Transcript_236553;Transcript_237462;Transcript_240479;Transcript_241239
GO:0010155	P:regulation_of_proton_transport	6	0.0506771	Transcript_006970;Transcript_035249;Transcript_130283;Transcript_225061;Transcript_230080;Transcript_240919
GO:0005773	C:vacuole	220	1.21659e-24	Transcript_000167;Transcript_003638;Transcript_004021;Transcript_005092;Transcript_005881;Transcript_006076;Transcript_006506;Transcript_007729;Transcript_007741;Transcript_008147;Transcript_008169;Transcript_008453;Transcript_008678;Transcript_008894;Transcript_009143;Transcript_009157;Transcript_009448;Transcript_009459;Transcript_009542;Transcript_011203;Transcript_011491;Transcript_013464;Tra…
GO:0000784	C:nuclear_chromosome,_telomeric_region	10	0.744622	Transcript_016940;Transcript_028690;Transcript_043166;Transcript_195595;Transcript_196769;Transcript_200275;Transcript_215242;Transcript_230244;Transcript_238263;Transcript_242714
GO:0004319	F:enoyl-acyl-carrier-protein_reductase_(NADPH,_B-specific)_activity	4	0.79695	Transcript_066148;Transcript_127755;Transcript_155023;Transcript_189857
GO:0071347	P:cellular_response_to_interleukin-1	3	0.527991	Transcript_221863;Transcript_226420;Transcript_228725
ko00770	Pantothenate_and_CoA_biosynthesis	14	0.0327978	Transcript_008072;Transcript_016816;Transcript_021167;Transcript_027691;Transcript_040344;Transcript_060127;Transcript_065059;Transcript_074888;Transcript_100298;Transcript_118070;Transcript_183003;Transcript_194245;Transcript_199885;Transcript_231465
GO:0015630	C:microtubule_cytoskeleton	4	0.0031866	Transcript_175272;Transcript_203548;Transcript_204403;Transcript_238419
GO:0010992	P:ubiquitin_homeostasis	2	1	Transcript_039672;Transcript_156448
ko00630	Glyoxylate_and_dicarboxylate_metabolism	46	2.89599e-05	Transcript_001574;Transcript_014643;Transcript_018746;Transcript_019596;Transcript_021436;Transcript_023212;Transcript_024584;Transcript_024636;Transcript_026348;Transcript_043020;Transcript_043887;Transcript_057776;Transcript_073685;Transcript_075480;Transcript_082227;Transcript_082809;Transcript_084580;Transcript_093453;Transcript_107327;Transcript_113695;Transcript_139088;Transcript_149311;Tra…
GO:0010161	P:red_light_signaling_pathway	2	0.190669	Transcript_016768;Transcript_232297
GO:0000943	C:retrotransposon_nucleocapsid	4	0.0138474	Transcript_016600;Transcript_028366;Transcript_226266;Transcript_234470
GO:0030158	F:protein_xylosyltransferase_activity	4	1	Transcript_032994;Transcript_227762;Transcript_228074;Transcript_237268
GO:1904159	P:megasporocyte_differentiation	2	0.406345	Transcript_078006;Transcript_241227
GO:2000031	P:regulation_of_salicylic_acid_mediated_signaling_pathway	9	0.864563	Transcript_022180;Transcript_080417;Transcript_095376;Transcript_145272;Transcript_157816;Transcript_173644;Transcript_191377;Transcript_231454;Transcript_241454
GO:0015853	P:adenine_transport	2	0.281171	Transcript_154044;Transcript_233582
GO:0051287	F:NAD_binding	67	9.78169e-09	Transcript_000929;Transcript_008856;Transcript_009494;Transcript_010009;Transcript_016804;Transcript_018182;Transcript_020272;Transcript_021635;Transcript_023059;Transcript_023222;Transcript_023850;Transcript_025230;Transcript_028049;Transcript_029488;Transcript_033888;Transcript_038194;Transcript_041856;Transcript_042399;Transcript_043070;Transcript_043511;Transcript_046693;Transcript_052634;Tra…
GO:0005351	F:sugar:proton_symporter_activity	13	0.000424315	Transcript_005717;Transcript_037099;Transcript_042078;Transcript_062194;Transcript_091344;Transcript_110733;Transcript_150379;Transcript_154606;Transcript_163360;Transcript_228898;Transcript_231756;Transcript_236357;Transcript_244821
ko04139	Regulation_of_mitophagy_-_yeast	19	0.00401885	Transcript_007680;Transcript_027651;Transcript_042004;Transcript_059638;Transcript_067882;Transcript_075635;Transcript_104899;Transcript_112191;Transcript_140534;Transcript_151452;Transcript_178418;Transcript_184391;Transcript_185415;Transcript_186342;Transcript_212610;Transcript_222718;Transcript_225466;Transcript_228749;Transcript_234875
ko04977	Vitamin_digestion_and_absorption	2	0.19603	Transcript_230884;Transcript_238809
GO:0009741	P:response_to_brassinosteroid	14	0.0599115	Transcript_002815;Transcript_006813;Transcript_028369;Transcript_035826;Transcript_042945;Transcript_044346;Transcript_074557;Transcript_080393;Transcript_100617;Transcript_150334;Transcript_160231;Transcript_188997;Transcript_204611;Transcript_223274
GO:0048508	P:embryonic_meristem_development	3	0.303101	Transcript_029052;Transcript_194350;Transcript_229003
GO:0090430	F:caffeoyl-CoA:_alcohol_caffeoyl_transferase_activity	4	0.00233461	Transcript_011264;Transcript_033454;Transcript_035390;Transcript_057145
GO:0045544	F:gibberellin_20-oxidase_activity	3	0.527991	Transcript_008834;Transcript_049607;Transcript_231861
GO:0032137	F:guanine/thymine_mispair_binding	3	0.527991	Transcript_161971;Transcript_237928;Transcript_242155
GO:0007160	P:cell-matrix_adhesion	2	0.343054	Transcript_222697;Transcript_229174
GO:0080167	P:response_to_karrikin	42	0.000106146	Transcript_009632;Transcript_014555;Transcript_016440;Transcript_017025;Transcript_018235;Transcript_027282;Transcript_034581;Transcript_042926;Transcript_045041;Transcript_046501;Transcript_048427;Transcript_049607;Transcript_064445;Transcript_064684;Transcript_093055;Transcript_098916;Transcript_113639;Transcript_121945;Transcript_129681;Transcript_134461;Transcript_157974;Transcript_161652;Tra…
GO:0006606	P:protein_import_into_nucleus	31	0.000687225	Transcript_008543;Transcript_008729;Transcript_014656;Transcript_016857;Transcript_018940;Transcript_023894;Transcript_025106;Transcript_027900;Transcript_035574;Transcript_036176;Transcript_080143;Transcript_095355;Transcript_108981;Transcript_119811;Transcript_146755;Transcript_152417;Transcript_158395;Transcript_161041;Transcript_171438;Transcript_185252;Transcript_187271;Transcript_208862;Tra…
GO:0045177	C:apical_part_of_cell_	3	0.179749	Transcript_135745;Transcript_221863;Transcript_228725
GO:0048826	P:cotyledon_morphogenesis	3	1	Transcript_004860;Transcript_084933;Transcript_224713
GO:0003688	F:DNA_replication_origin_binding	3	0.645282	Transcript_099406;Transcript_116715;Transcript_239659
GO:0009540	F:zeaxanthin_epoxidase_overall_activity	4	1	Transcript_026153;Transcript_034427;Transcript_069974;Transcript_152061
ko00010	Glycolysis_/_Gluconeogenesis	72	3.51132e-08	Transcript_000864;Transcript_001574;Transcript_002074;Transcript_002622;Transcript_010009;Transcript_012876;Transcript_014026;Transcript_014643;Transcript_016946;Transcript_017990;Transcript_019424;Transcript_021556;Transcript_026348;Transcript_029683;Transcript_030584;Transcript_037155;Transcript_040821;Transcript_041807;Transcript_042657;Transcript_042860;Transcript_043175;Transcript_043303;Tra…
GO:0045431	F:flavonol_synthase_activity	4	1	Transcript_148086;Transcript_215624;Transcript_220342;Transcript_237670
GO:0046514	P:ceramide_catabolic_process	3	1	Transcript_158638;Transcript_222067;Transcript_231949
GO:0000786	C:nucleosome	39	0.000914643	Transcript_002119;Transcript_011323;Transcript_014853;Transcript_015850;Transcript_016164;Transcript_024517;Transcript_025733;Transcript_036254;Transcript_036301;Transcript_037144;Transcript_041427;Transcript_044768;Transcript_045019;Transcript_049826;Transcript_051974;Transcript_076566;Transcript_083651;Transcript_091307;Transcript_092014;Transcript_098199;Transcript_109208;Transcript_141112;Tra…
GO:0050811	F:GABA_receptor_binding	2	1	Transcript_059638;Transcript_112191
GO:0030122	C:AP-2_adaptor_complex_	3	0.805419	Transcript_027502;Transcript_143060;Transcript_163934
GO:0061136	P:regulation_of_proteasomal_protein_catabolic_process	12	0.020896	Transcript_015686;Transcript_038847;Transcript_042452;Transcript_067882;Transcript_083120;Transcript_140534;Transcript_187000;Transcript_191544;Transcript_207723;Transcript_222608;Transcript_237159;Transcript_242580
GO:0007231	P:osmosensory_signaling_pathway	5	1	Transcript_038359;Transcript_148056;Transcript_173310;Transcript_207585;Transcript_238765
GO:0009767	P:photosynthetic_electron_transport_chain	7	0.235393	Transcript_009558;Transcript_010921;Transcript_023909;Transcript_042714;Transcript_050144;Transcript_185029;Transcript_243539
ko05206	MicroRNAs_in_cancer	40	1.08001e-05	Transcript_000262;Transcript_004615;Transcript_012981;Transcript_014166;Transcript_017867;Transcript_019157;Transcript_024575;Transcript_032581;Transcript_033023;Transcript_035784;Transcript_036881;Transcript_042128;Transcript_044143;Transcript_049772;Transcript_059532;Transcript_081200;Transcript_082036;Transcript_091277;Transcript_098438;Transcript_099656;Transcript_107774;Transcript_112814;Tra…
GO:0050660	F:flavin_adenine_dinucleotide_binding	79	1.32639e-06	Transcript_000367;Transcript_000988;Transcript_001574;Transcript_002827;Transcript_003393;Transcript_009542;Transcript_014451;Transcript_014643;Transcript_018364;Transcript_025583;Transcript_026348;Transcript_026795;Transcript_027335;Transcript_028047;Transcript_032053;Transcript_042846;Transcript_042960;Transcript_046517;Transcript_047156;Transcript_053296;Transcript_054853;Transcript_063152;Tra…
GO:0004722	F:protein_serine/threonine_phosphatase_activity	79	7.77749e-06	Transcript_001949;Transcript_004615;Transcript_005552;Transcript_007033;Transcript_007158;Transcript_011923;Transcript_013342;Transcript_016311;Transcript_016945;Transcript_017629;Transcript_018079;Transcript_018282;Transcript_019538;Transcript_019663;Transcript_022099;Transcript_022125;Transcript_024005;Transcript_024746;Transcript_025199;Transcript_025639;Transcript_027475;Transcript_027579;Tra…
GO:0010310	P:regulation_of_hydrogen_peroxide_metabolic_process	10	0.166839	Transcript_002459;Transcript_005159;Transcript_016764;Transcript_095376;Transcript_105597;Transcript_130283;Transcript_156931;Transcript_225061;Transcript_230080;Transcript_237896
GO:0015030	C:Cajal_body	10	0.058809	Transcript_003601;Transcript_011350;Transcript_017661;Transcript_018130;Transcript_043889;Transcript_089683;Transcript_165606;Transcript_194293;Transcript_205045;Transcript_238483
GO:0015802	P:basic_amino_acid_transport	2	0.14426	Transcript_234323;Transcript_235231
GO:0070979	P:protein_K11-linked_ubiquitination	4	0.367155	Transcript_117708;Transcript_124365;Transcript_139174;Transcript_233890
ko00350	Tyrosine_metabolism	17	0.000963422	Transcript_030584;Transcript_034831;Transcript_043951;Transcript_045602;Transcript_090011;Transcript_111081;Transcript_124818;Transcript_195860;Transcript_222132;Transcript_222398;Transcript_222613;Transcript_228907;Transcript_228968;Transcript_234046;Transcript_237637;Transcript_242401;Transcript_244806
ko00981	Insect_hormone_biosynthesis	2	1	Transcript_032120;Transcript_163333
GO:1900363	P:regulation_of_mRNA_polyadenylation	3	1	Transcript_027836;Transcript_173644;Transcript_226150
GO:0004791	F:thioredoxin-disulfide_reductase_activity	4	0.163503	Transcript_027335;Transcript_093599;Transcript_113522;Transcript_162699
GO:2000123	P:positive_regulation_of_stomatal_complex_development	2	1	Transcript_137918;Transcript_201468
GO:0006163	P:purine_nucleotide_metabolic_process	3	0.00377409	Transcript_006160;Transcript_043717;Transcript_198468
GO:0010024	P:phytochromobilin_biosynthetic_process	3	0.527991	Transcript_087500;Transcript_203622;Transcript_214489
GO:0072659	P:protein_localization_to_plasma_membrane	4	0.342182	Transcript_093222;Transcript_143707;Transcript_205702;Transcript_241752
GO:0009001	F:serine_O-acetyltransferase_activity	2	0.595334	Transcript_029193;Transcript_199275
GO:0005385	F:zinc_ion_transmembrane_transporter_activity	2	0.006011	Transcript_045758;Transcript_227333
GO:0016020	C:membrane	495	7.2105e-50	Transcript_000714;Transcript_000897;Transcript_001072;Transcript_002196;Transcript_002555;Transcript_002815;Transcript_003002;Transcript_003076;Transcript_003127;Transcript_003601;Transcript_004322;Transcript_005880;Transcript_006773;Transcript_007083;Transcript_007166;Transcript_007264;Transcript_007379;Transcript_007859;Transcript_007873;Transcript_007932;Transcript_008292;Transcript_008453;Tra…
GO:0010256	P:endomembrane_system_organization	6	0.0235511	Transcript_005928;Transcript_008140;Transcript_088132;Transcript_104833;Transcript_138224;Transcript_222019
GO:0031429	C:box_H/ACA_snoRNP_complex_	4	0.342182	Transcript_043981;Transcript_103493;Transcript_232706;Transcript_234243
GO:0045735	F:nutrient_reservoir_activity	10	0.00439825	Transcript_003701;Transcript_008274;Transcript_042510;Transcript_086650;Transcript_135958;Transcript_151165;Transcript_162908;Transcript_222113;Transcript_224051;Transcript_236189
GO:0004047	F:aminomethyltransferase_activity	5	0.810889	Transcript_021813;Transcript_093453;Transcript_166748;Transcript_214102;Transcript_226314
GO:0030071	P:regulation_of_mitotic_metaphase/anaphase_transition	4	0.0242358	Transcript_007259;Transcript_103584;Transcript_158365;Transcript_243514
GO:0010015	P:root_morphogenesis	3	0.639444	Transcript_095035;Transcript_127616;Transcript_230754
GO:0004347	F:glucose-6-phosphate_isomerase_activity	2	0.343054	Transcript_228709;Transcript_243294
GO:0009939	P:positive_regulation_of_gibberellic_acid_mediated_signaling_pathway	6	1	Transcript_012159;Transcript_030613;Transcript_041608;Transcript_080059;Transcript_159892;Transcript_175089
GO:0032197	P:transposition,_RNA-mediated	9	0.0027732	Transcript_009058;Transcript_016600;Transcript_028366;Transcript_060977;Transcript_083651;Transcript_130853;Transcript_224573;Transcript_226266;Transcript_234470
GO:0003954	F:NADH_dehydrogenase_activity	3	0.639444	Transcript_005814;Transcript_157598;Transcript_197489
GO:0004729	F:oxygen-dependent_protoporphyrinogen_oxidase_activity	3	0.527991	Transcript_028099;Transcript_072455;Transcript_239477
GO:0010369	C:chromocenter_	2	0.602246	Transcript_155446;Transcript_243218
GO:0000427	C:plastid-encoded_plastid_RNA_polymerase_complex	3	0.527991	Transcript_187753;Transcript_236980;Transcript_241511
GO:0006420	P:arginyl-tRNA_aminoacylation	3	0.639444	Transcript_012905;Transcript_046051;Transcript_235464
GO:0003937	F:IMP_cyclohydrolase_activity	2	0.456579	Transcript_011154;Transcript_235160
GO:0004766	F:spermidine_synthase_activity	5	0.575187	Transcript_016682;Transcript_025669;Transcript_046673;Transcript_125123;Transcript_194310
ko05168	Herpes_simplex_infection	45	2.20069e-08	Transcript_004300;Transcript_005400;Transcript_006795;Transcript_007158;Transcript_007680;Transcript_008449;Transcript_013342;Transcript_016098;Transcript_017223;Transcript_018065;Transcript_022136;Transcript_025199;Transcript_032232;Transcript_034172;Transcript_040611;Transcript_045115;Transcript_054599;Transcript_079560;Transcript_097747;Transcript_098438;Transcript_107816;Transcript_117496;Tra…
GO:0010275	P:NAD(P)H_dehydrogenase_complex_assembly	4	0.316916	Transcript_051541;Transcript_137483;Transcript_240003;Transcript_243223
GO:0051365	P:cellular_response_to_potassium_ion_starvation	2	0.105779	Transcript_022965;Transcript_161004
ko04260	Cardiac_muscle_contraction	15	0.000152685	Transcript_013503;Transcript_026011;Transcript_043609;Transcript_043638;Transcript_049612;Transcript_063759;Transcript_076030;Transcript_141001;Transcript_183007;Transcript_224873;Transcript_227194;Transcript_227818;Transcript_233724;Transcript_239881;Transcript_242193
GO:0048262	P:determination_of_dorsal/ventral_asymmetry	4	0.00593063	Transcript_014147;Transcript_029984;Transcript_195832;Transcript_221786
GO:0005986	P:sucrose_biosynthetic_process	6	0.134191	Transcript_018807;Transcript_173598;Transcript_191327;Transcript_232397;Transcript_240563;Transcript_241236
GO:0040008	P:regulation_of_growth	46	8.10979e-08	Transcript_003093;Transcript_007914;Transcript_008939;Transcript_009286;Transcript_009359;Transcript_018261;Transcript_020976;Transcript_022653;Transcript_027827;Transcript_028332;Transcript_030514;Transcript_033086;Transcript_041366;Transcript_042258;Transcript_044034;Transcript_044346;Transcript_067728;Transcript_082825;Transcript_090876;Transcript_093404;Transcript_099656;Transcript_110725;Tra…
ko03018	RNA_degradation	84	2.05096e-07	Transcript_005385;Transcript_006675;Transcript_007955;Transcript_008914;Transcript_009730;Transcript_012170;Transcript_012757;Transcript_012930;Transcript_013159;Transcript_013502;Transcript_014001;Transcript_017180;Transcript_017529;Transcript_018807;Transcript_019944;Transcript_021949;Transcript_023930;Transcript_025003;Transcript_026221;Transcript_026454;Transcript_028537;Transcript_030389;Tra…
GO:0009311	P:oligosaccharide_metabolic_process	6	0.837471	Transcript_020755;Transcript_184393;Transcript_188406;Transcript_196073;Transcript_225565;Transcript_232414
GO:0004180	F:carboxypeptidase_activity	6	0.213234	Transcript_180054;Transcript_198586;Transcript_203217;Transcript_207354;Transcript_225839;Transcript_240329
GO:0019941	P:modification-dependent_protein_catabolic_process	2	0.776635	Transcript_035014;Transcript_165186
GO:0006434	P:seryl-tRNA_aminoacylation	2	0.0412318	Transcript_020339;Transcript_190886
GO:0042777	P:plasma_membrane_ATP_synthesis_coupled_proton_transport	2	0.695033	Transcript_034232;Transcript_092111
GO:0010268	P:brassinosteroid_homeostasis	2	0.343054	Transcript_034422;Transcript_138514
GO:0042538	P:hyperosmotic_salinity_response	18	0.0153631	Transcript_013346;Transcript_017478;Transcript_024829;Transcript_066928;Transcript_072587;Transcript_141402;Transcript_166515;Transcript_172211;Transcript_184641;Transcript_199885;Transcript_222352;Transcript_228235;Transcript_228557;Transcript_231465;Transcript_232228;Transcript_234734;Transcript_235965;Transcript_241289
GO:0043139	F:5'-3'_DNA_helicase_activity	2	0.19603	Transcript_014421;Transcript_237921
GO:0030245	P:cellulose_catabolic_process	10	0.0239681	Transcript_014798;Transcript_030635;Transcript_050030;Transcript_157759;Transcript_159402;Transcript_166139;Transcript_179103;Transcript_209692;Transcript_230078;Transcript_244689
GO:0050506	F:vomilenine_glucosyltransferase_activity	2	0.776635	Transcript_042305;Transcript_073235
GO:0006002	P:fructose_6-phosphate_metabolic_process	7	0.0224923	Transcript_030690;Transcript_075145;Transcript_141192;Transcript_183343;Transcript_213712;Transcript_224279;Transcript_227226
GO:0005736	C:DNA-directed_RNA_polymerase_I_complex_	9	0.0202916	Transcript_024610;Transcript_045641;Transcript_147999;Transcript_150478;Transcript_194577;Transcript_200237;Transcript_204285;Transcript_240746;Transcript_241223
GO:0015194	F:L-serine_transmembrane_transporter_activity	6	0.171222	Transcript_009968;Transcript_098922;Transcript_180880;Transcript_201742;Transcript_236224;Transcript_240498
GO:0009853	P:photorespiration	16	1.51534e-05	Transcript_019203;Transcript_033063;Transcript_041745;Transcript_044798;Transcript_046680;Transcript_122095;Transcript_126161;Transcript_152864;Transcript_172472;Transcript_206305;Transcript_226286;Transcript_230052;Transcript_231606;Transcript_232012;Transcript_239242;Transcript_239833
GO:0018931	P:naphthalene_metabolic_process	2	0.154885	Transcript_043848;Transcript_225871
GO:0017091	F:AU-rich_element_binding	2	0.602246	Transcript_035793;Transcript_085215
GO:0071470	P:cellular_response_to_osmotic_stress	2	0.602246	Transcript_115875;Transcript_242627
GO:0043130	F:ubiquitin_binding	16	0.040522	Transcript_013885;Transcript_029258;Transcript_032009;Transcript_043987;Transcript_052040;Transcript_062784;Transcript_079526;Transcript_087040;Transcript_102815;Transcript_140564;Transcript_181199;Transcript_209443;Transcript_229571;Transcript_236156;Transcript_237091;Transcript_240826
GO:0021794	P:thalamus_development	3	0.25427	Transcript_053448;Transcript_063759;Transcript_097665
GO:0047130	F:saccharopine_dehydrogenase_(NADP+,_L-lysine-forming)_activity	2	0.190669	Transcript_041416;Transcript_160957
GO:0030981	C:cortical_microtubule_cytoskeleton_	3	0.0765394	Transcript_060521;Transcript_152461;Transcript_213409
GO:0048578	P:positive_regulation_of_long-day_photoperiodism,_flowering	2	0.595334	Transcript_021463;Transcript_212448
GO:0015152	F:glucose-6-phosphate_transmembrane_transporter_activity	2	0.595334	Transcript_041661;Transcript_242666
GO:0016407	F:acetyltransferase_activity	3	0.7609	Transcript_020142;Transcript_163580;Transcript_219275
GO:0008453	F:alanine-glyoxylate_transaminase_activity	2	0.0083522	Transcript_231606;Transcript_243550
[truncated: 2,294 more rows]

## Sheet: GOCC
Category	Description	#Genes	pValue	#Genes
GO:0016021	C:integral_component_of_membrane	2069	8.84269e-246	Transcript_000081;Transcript_000367;Transcript_000494;Transcript_000619;Transcript_000687;Transcript_000714;Transcript_000980;Transcript_000988;Transcript_001072;Transcript_001319;Transcript_001398;Transcript_001411;Transcript_001458;Transcript_001724;Transcript_001813;Transcript_001984;Transcript_002026;Transcript_002047;Transcript_002196;Transcript_002459;Transcript_002595;Transcript_002649;Tra…
GO:0005634	C:nucleus	2016	1.78955e-247	Transcript_000025;Transcript_000082;Transcript_000167;Transcript_000262;Transcript_000274;Transcript_000361;Transcript_000626;Transcript_000919;Transcript_001104;Transcript_001505;Transcript_001560;Transcript_001635;Transcript_001687;Transcript_002104;Transcript_002119;Transcript_002218;Transcript_002427;Transcript_002459;Transcript_002482;Transcript_002711;Transcript_002722;Transcript_002736;Tra…
GO:0005737	C:cytoplasm	1377	1.35947e-184	Transcript_000025;Transcript_000167;Transcript_000262;Transcript_000563;Transcript_000620;Transcript_000710;Transcript_000743;Transcript_000864;Transcript_000929;Transcript_001256;Transcript_001505;Transcript_002104;Transcript_002210;Transcript_002427;Transcript_002621;Transcript_002654;Transcript_002722;Transcript_002893;Transcript_003321;Transcript_003547;Transcript_003556;Transcript_003593;Tra…
GO:0005886	C:plasma_membrane	1289	5.65361e-154	Transcript_000167;Transcript_000347;Transcript_000368;Transcript_000494;Transcript_000648;Transcript_000687;Transcript_000980;Transcript_001012;Transcript_002138;Transcript_002196;Transcript_002218;Transcript_002422;Transcript_002488;Transcript_002736;Transcript_002815;Transcript_002893;Transcript_003127;Transcript_003467;Transcript_003470;Transcript_003537;Transcript_003638;Transcript_004039;Tra…
GO:0005829	C:cytosol	863	6.49143e-102	Transcript_000056;Transcript_000114;Transcript_000167;Transcript_001012;Transcript_001104;Transcript_001505;Transcript_002011;Transcript_002104;Transcript_002218;Transcript_002622;Transcript_002736;Transcript_003076;Transcript_003467;Transcript_003758;Transcript_003866;Transcript_004127;Transcript_004137;Transcript_004453;Transcript_004468;Transcript_004748;Transcript_005015;Transcript_005215;Tra…
GO:0009507	C:chloroplast	815	3.96424e-101	Transcript_001527;Transcript_001574;Transcript_001784;Transcript_002138;Transcript_002210;Transcript_002658;Transcript_002738;Transcript_003002;Transcript_003043;Transcript_003099;Transcript_003141;Transcript_003638;Transcript_003800;Transcript_003891;Transcript_004148;Transcript_004377;Transcript_004455;Transcript_004598;Transcript_005090;Transcript_005143;Transcript_005549;Transcript_005672;Tra…
GO:0005739	C:mitochondrion	541	1.55508e-71	Transcript_000373;Transcript_002006;Transcript_002026;Transcript_002074;Transcript_002619;Transcript_002622;Transcript_002897;Transcript_003141;Transcript_003275;Transcript_003467;Transcript_003860;Transcript_005143;Transcript_006066;Transcript_006675;Transcript_006969;Transcript_007641;Transcript_007791;Transcript_008140;Transcript_008338;Transcript_008615;Transcript_008914;Transcript_009448;Tra…
GO:0009506	C:plasmodesma	520	3.42445e-54	Transcript_000368;Transcript_002488;Transcript_002815;Transcript_003467;Transcript_003470;Transcript_003554;Transcript_004406;Transcript_005015;Transcript_005569;Transcript_006076;Transcript_006813;Transcript_006997;Transcript_007166;Transcript_007264;Transcript_007730;Transcript_007741;Transcript_007871;Transcript_007873;Transcript_008282;Transcript_008453;Transcript_008678;Transcript_008894;Tra…
GO:0016020	C:membrane	495	7.2105e-50	Transcript_000714;Transcript_000897;Transcript_001072;Transcript_002196;Transcript_002555;Transcript_002815;Transcript_003002;Transcript_003076;Transcript_003127;Transcript_003601;Transcript_004322;Transcript_005880;Transcript_006773;Transcript_007083;Transcript_007166;Transcript_007264;Transcript_007379;Transcript_007859;Transcript_007873;Transcript_007932;Transcript_008292;Transcript_008453;Tra…
GO:0005794	C:Golgi_apparatus	403	2.86291e-55	Transcript_000081;Transcript_001104;Transcript_001319;Transcript_001808;Transcript_002026;Transcript_002893;Transcript_004453;Transcript_005015;Transcript_005595;Transcript_005880;Transcript_006193;Transcript_006266;Transcript_006790;Transcript_007264;Transcript_007379;Transcript_008292;Transcript_008375;Transcript_008404;Transcript_008667;Transcript_009242;Transcript_009549;Transcript_009608;Tra…
GO:0005576	C:extracellular_region	336	1.08155e-41	Transcript_000129;Transcript_002680;Transcript_003558;Transcript_004021;Transcript_004523;Transcript_004696;Transcript_004931;Transcript_005137;Transcript_005471;Transcript_005637;Transcript_005848;Transcript_006427;Transcript_006795;Transcript_007072;Transcript_007299;Transcript_007730;Transcript_007932;Transcript_008470;Transcript_008494;Transcript_008841;Transcript_008926;Transcript_009218;Tra…
GO:0005789	C:endoplasmic_reticulum_membrane	325	9.29591e-42	Transcript_002047;Transcript_002537;Transcript_003076;Transcript_003179;Transcript_005751;Transcript_005874;Transcript_006915;Transcript_006970;Transcript_007083;Transcript_007791;Transcript_008147;Transcript_008316;Transcript_008615;Transcript_009640;Transcript_010967;Transcript_011802;Transcript_012685;Transcript_012848;Transcript_012922;Transcript_013116;Transcript_013262;Transcript_014534;Tra…
GO:0005783	C:endoplasmic_reticulum_	303	3.98221e-40	Transcript_000081;Transcript_001072;Transcript_001104;Transcript_001319;Transcript_002047;Transcript_002621;Transcript_003076;Transcript_003891;Transcript_005751;Transcript_006266;Transcript_006281;Transcript_007083;Transcript_007163;Transcript_007800;Transcript_008158;Transcript_008316;Transcript_008375;Transcript_008597;Transcript_009590;Transcript_009933;Transcript_010111;Transcript_011802;Tra…
GO:0005730	C:nucleolus	259	6.08741e-29	Transcript_002074;Transcript_002104;Transcript_003467;Transcript_003573;Transcript_003601;Transcript_004077;Transcript_004862;Transcript_006216;Transcript_006795;Transcript_007166;Transcript_007368;Transcript_007641;Transcript_007868;Transcript_008453;Transcript_012170;Transcript_012571;Transcript_012761;Transcript_015616;Transcript_015850;Transcript_016190;Transcript_016578;Transcript_016857;Tra…
GO:0000139	C:Golgi_membrane	238	5.51526e-41	Transcript_002026;Transcript_004125;Transcript_004453;Transcript_004905;Transcript_005277;Transcript_005595;Transcript_005874;Transcript_005880;Transcript_006193;Transcript_007379;Transcript_008147;Transcript_008169;Transcript_008292;Transcript_008375;Transcript_008962;Transcript_009549;Transcript_009640;Transcript_010173;Transcript_010967;Transcript_011648;Transcript_011799;Transcript_012922;Tra…
GO:0009570	C:chloroplast_stroma	235	6.98576e-27	Transcript_001527;Transcript_001574;Transcript_002210;Transcript_002658;Transcript_002738;Transcript_003002;Transcript_003099;Transcript_003141;Transcript_003467;Transcript_003860;Transcript_004377;Transcript_004598;Transcript_004749;Transcript_004822;Transcript_005159;Transcript_006635;Transcript_007649;Transcript_007719;Transcript_008002;Transcript_008332;Transcript_009141;Transcript_009143;Tra…
GO:0005618	C:cell_wall_	226	8.61285e-27	Transcript_000129;Transcript_001808;Transcript_003467;Transcript_003558;Transcript_004523;Transcript_005137;Transcript_005471;Transcript_006427;Transcript_007166;Transcript_007704;Transcript_007859;Transcript_007932;Transcript_008470;Transcript_008841;Transcript_009185;Transcript_009218;Transcript_009546;Transcript_010491;Transcript_012072;Transcript_012139;Transcript_012289;Transcript_012421;Tra…
GO:0005773	C:vacuole	220	1.21659e-24	Transcript_000167;Transcript_003638;Transcript_004021;Transcript_005092;Transcript_005881;Transcript_006076;Transcript_006506;Transcript_007729;Transcript_007741;Transcript_008147;Transcript_008169;Transcript_008453;Transcript_008678;Transcript_008894;Transcript_009143;Transcript_009157;Transcript_009448;Transcript_009459;Transcript_009542;Transcript_011203;Transcript_011491;Transcript_013464;Tra…
GO:0005840	C:ribosome_	197	1.19203e-26	Transcript_000250;Transcript_000260;Transcript_000373;Transcript_000399;Transcript_001111;Transcript_002363;Transcript_004690;Transcript_005041;Transcript_006817;Transcript_006969;Transcript_007649;Transcript_009487;Transcript_010845;Transcript_012128;Transcript_012657;Transcript_013242;Transcript_013758;Transcript_013859;Transcript_014241;Transcript_014879;Transcript_015293;Transcript_016218;Tra…
GO:0005774	C:vacuolar_membrane	197	6.2098e-32	Transcript_000167;Transcript_002074;Transcript_003891;Transcript_005880;Transcript_005973;Transcript_006193;Transcript_006675;Transcript_006729;Transcript_006855;Transcript_006877;Transcript_007166;Transcript_007741;Transcript_008169;Transcript_008453;Transcript_009157;Transcript_009448;Transcript_009685;Transcript_011837;Transcript_013464;Transcript_014046;Transcript_015355;Transcript_015622;Tra…
GO:0005654	C:nucleoplasm	184	4.74536e-15	Transcript_003573;Transcript_005215;Transcript_007006;Transcript_007391;Transcript_007576;Transcript_007641;Transcript_008762;Transcript_008971;Transcript_009189;Transcript_011217;Transcript_011350;Transcript_011857;Transcript_012922;Transcript_013502;Transcript_015354;Transcript_015953;Transcript_016158;Transcript_016621;Transcript_016811;Transcript_017329;Transcript_021363;Transcript_022761;Tra…
GO:0005743	C:mitochondrial_inner_membrane	181	5.60314e-22	Transcript_002006;Transcript_002827;Transcript_005143;Transcript_005308;Transcript_012787;Transcript_013442;Transcript_013503;Transcript_014498;Transcript_015462;Transcript_015806;Transcript_017208;Transcript_017903;Transcript_018859;Transcript_019158;Transcript_020229;Transcript_020387;Transcript_021257;Transcript_023437;Transcript_023792;Transcript_023862;Transcript_023880;Transcript_026011;Tra…
[truncated: 508 more rows]

## Sheet: GOMF
Category	Description	#Genes	pValue	#Genes
[truncated: 1,221 more rows]

## Sheet: GOBP
Category	Description	#Genes	pValue	#Genes
[truncated: 2,214 more rows]
