# Supplementary material for: Characterization of Transcriptome Dynamics during Early Fruit Development in Olive (Olea europaea L.)
Source: Int J Mol Sci. 2023 Jan 4;24(2):961. doi: 10.3390/ijms24020961 (PMC9864153; doi:10.3390/ijms24020961)
Supplement: Supplementary file 1 [file ijms-24-00961-s001.zip › Table S11_P28_VS_P14_UP_Functional_Enrichment.xlsx]

## Sheet: Functional_Enrichment
Supplementary Table S11. The enrichment analysis of GO terms based on up-regulated DEGs in the expanding fruits at 28 (P28) DPA versus the dividing fruits at 14 (P14) during early olive fruit development.
Category	Description	#Genes	pValue	Genes
GO:0008270	F:zinc_ion_binding	48	0	Transcript_004984;Transcript_007889;Transcript_010419;Transcript_012970;Transcript_014569;Transcript_015868;Transcript_016835;Transcript_017547;Transcript_018642;Transcript_019168;Transcript_021826;Transcript_022995;Transcript_024907;Transcript_026141;Transcript_027334;Transcript_030311;Transcript_046001;Transcript_046126;Transcript_056680;Transcript_057485;Transcript_063344;Transcript_085550;Tra…
GO:0005794	C:Golgi_apparatus	31	0	Transcript_008603;Transcript_010173;Transcript_013087;Transcript_013751;Transcript_016723;Transcript_017184;Transcript_017448;Transcript_019639;Transcript_020376;Transcript_024907;Transcript_030020;Transcript_035136;Transcript_043054;Transcript_067394;Transcript_090131;Transcript_097235;Transcript_098689;Transcript_103018;Transcript_114412;Transcript_130941;Transcript_146566;Transcript_150334;Tra…
GO:0009507	C:chloroplast	49	0	Transcript_001997;Transcript_005103;Transcript_006354;Transcript_012173;Transcript_013189;Transcript_013810;Transcript_014426;Transcript_017184;Transcript_017984;Transcript_020430;Transcript_021575;Transcript_028226;Transcript_029884;Transcript_031089;Transcript_034648;Transcript_036840;Transcript_056651;Transcript_077958;Transcript_090816;Transcript_096339;Transcript_099826;Transcript_148379;Tra…
GO:0003677	F:DNA_binding	45	0	Transcript_009806;Transcript_014919;Transcript_015426;Transcript_019191;Transcript_020644;Transcript_021802;Transcript_027562;Transcript_028266;Transcript_029854;Transcript_032947;Transcript_046801;Transcript_050305;Transcript_054998;Transcript_085954;Transcript_095035;Transcript_099826;Transcript_113094;Transcript_114809;Transcript_123900;Transcript_136856;Transcript_152823;Transcript_153778;Tra…
GO:0003700	F:sequence-specific_DNA_binding_transcription_factor_activity	36	0	Transcript_005379;Transcript_006356;Transcript_009806;Transcript_014648;Transcript_015426;Transcript_016282;Transcript_019191;Transcript_021802;Transcript_026446;Transcript_027562;Transcript_029854;Transcript_029892;Transcript_032947;Transcript_041388;Transcript_046001;Transcript_046801;Transcript_050305;Transcript_059815;Transcript_084933;Transcript_085954;Transcript_113094;Transcript_114809;Tra…
GO:0016020	C:membrane	34	0	Transcript_004775;Transcript_007313;Transcript_008603;Transcript_010419;Transcript_010715;Transcript_013778;Transcript_019639;Transcript_024907;Transcript_026446;Transcript_030079;Transcript_032544;Transcript_042490;Transcript_044064;Transcript_050374;Transcript_079032;Transcript_083500;Transcript_084534;Transcript_119441;Transcript_130786;Transcript_169444;Transcript_175752;Transcript_192923;Tra…
GO:0006355	P:regulation_of_transcription,_DNA-templated	43	0	Transcript_005379;Transcript_012970;Transcript_014648;Transcript_015868;Transcript_016282;Transcript_017547;Transcript_018071;Transcript_021802;Transcript_022995;Transcript_026446;Transcript_029854;Transcript_029892;Transcript_036221;Transcript_046001;Transcript_046126;Transcript_046801;Transcript_056680;Transcript_119441;Transcript_123900;Transcript_124944;Transcript_136856;Transcript_137783;Tra…
GO:0009506	C:plasmodesma	40	0	Transcript_000349;Transcript_003957;Transcript_005249;Transcript_006455;Transcript_006961;Transcript_012960;Transcript_015547;Transcript_015691;Transcript_016723;Transcript_017628;Transcript_018878;Transcript_018886;Transcript_029440;Transcript_030020;Transcript_031135;Transcript_034289;Transcript_043932;Transcript_044618;Transcript_050046;Transcript_053308;Transcript_087669;Transcript_090131;Tra…
GO:0005829	C:cytosol	66	0	Transcript_002570;Transcript_003163;Transcript_003866;Transcript_003949;Transcript_006356;Transcript_006455;Transcript_010715;Transcript_015547;Transcript_017434;Transcript_025794;Transcript_026141;Transcript_027305;Transcript_028065;Transcript_028700;Transcript_029593;Transcript_030483;Transcript_031089;Transcript_032947;Transcript_033768;Transcript_034685;Transcript_035652;Transcript_036865;Tra…
GO:0005739	C:mitochondrion	41	0	Transcript_002006;Transcript_006455;Transcript_006521;Transcript_007313;Transcript_007889;Transcript_007908;Transcript_016991;Transcript_020323;Transcript_024979;Transcript_026157;Transcript_027334;Transcript_030311;Transcript_032253;Transcript_032946;Transcript_041694;Transcript_044457;Transcript_050374;Transcript_079032;Transcript_096339;Transcript_129194;Transcript_133640;Transcript_151033;Tra…
GO:0004674	F:protein_serine/threonine_kinase_activity	29	0	Transcript_006961;Transcript_010386;Transcript_013064;Transcript_015691;Transcript_016726;Transcript_017154;Transcript_017434;Transcript_018119;Transcript_019354;Transcript_029440;Transcript_030477;Transcript_069724;Transcript_085549;Transcript_123901;Transcript_133653;Transcript_149488;Transcript_152640;Transcript_156614;Transcript_157821;Transcript_161985;Transcript_169578;Transcript_170699;Tra…
GO:0006351	P:transcription,_DNA-templated	63	0	Transcript_004956;Transcript_005379;Transcript_006356;Transcript_009806;Transcript_014648;Transcript_015426;Transcript_015868;Transcript_016456;Transcript_018071;Transcript_019191;Transcript_021463;Transcript_021802;Transcript_021826;Transcript_026446;Transcript_027562;Transcript_029892;Transcript_036221;Transcript_041388;Transcript_046126;Transcript_046801;Transcript_050305;Transcript_059815;Tra…
GO:0005576	C:extracellular_region	23	5.28397e-297	Transcript_009042;Transcript_009948;Transcript_013751;Transcript_015717;Transcript_016788;Transcript_019393;Transcript_020891;Transcript_030020;Transcript_032093;Transcript_033032;Transcript_044266;Transcript_050046;Transcript_050448;Transcript_055095;Transcript_125911;Transcript_154296;Transcript_155035;Transcript_169444;Transcript_170093;Transcript_174303;Transcript_227236;Transcript_229288;Tra…
GO:0003723	F:RNA_binding	29	5.62685e-294	Transcript_006521;Transcript_013778;Transcript_015722;Transcript_029064;Transcript_045261;Transcript_047178;Transcript_085531;Transcript_085550;Transcript_102209;Transcript_104878;Transcript_120759;Transcript_121302;Transcript_124077;Transcript_124944;Transcript_126907;Transcript_181887;Transcript_196525;Transcript_197101;Transcript_201765;Transcript_202126;Transcript_203844;Transcript_204080;Tra…
GO:0005789	C:endoplasmic_reticulum_membrane	22	3.58412e-289	Transcript_002570;Transcript_004775;Transcript_022911;Transcript_026328;Transcript_032311;Transcript_032732;Transcript_034277;Transcript_042490;Transcript_056993;Transcript_094276;Transcript_105809;Transcript_115223;Transcript_150337;Transcript_152573;Transcript_156117;Transcript_161710;Transcript_169084;Transcript_175752;Transcript_196075;Transcript_234615;Transcript_237255;Transcript_239938
GO:0003735	F:structural_constituent_of_ribosome	21	7.67563e-280	Transcript_015422;Transcript_019621;Transcript_021575;Transcript_025794;Transcript_028268;Transcript_029064;Transcript_029884;Transcript_030079;Transcript_034145;Transcript_036865;Transcript_041930;Transcript_069732;Transcript_111339;Transcript_121302;Transcript_165440;Transcript_180432;Transcript_201479;Transcript_204080;Transcript_206649;Transcript_208291;Transcript_230129
GO:0005783	C:endoplasmic_reticulum_	17	5.40186e-274	Transcript_002570;Transcript_004775;Transcript_026328;Transcript_042490;Transcript_044064;Transcript_067394;Transcript_150337;Transcript_175752;Transcript_190551;Transcript_196075;Transcript_198229;Transcript_202003;Transcript_222135;Transcript_228577;Transcript_234615;Transcript_237255;Transcript_244520
GO:0006412	P:translation	21	1.49905e-270	Transcript_015422;Transcript_019621;Transcript_021575;Transcript_028268;Transcript_029064;Transcript_029884;Transcript_030079;Transcript_034145;Transcript_036865;Transcript_041930;Transcript_069732;Transcript_084534;Transcript_111339;Transcript_121302;Transcript_165440;Transcript_180432;Transcript_201479;Transcript_204080;Transcript_206649;Transcript_208291;Transcript_230129
GO:0016567	P:protein_ubiquitination	18	1.50595e-223	Transcript_008818;Transcript_014701;Transcript_017502;Transcript_030483;Transcript_034100;Transcript_044064;Transcript_050482;Transcript_063344;Transcript_065703;Transcript_104470;Transcript_171852;Transcript_181481;Transcript_189612;Transcript_191732;Transcript_207574;Transcript_218433;Transcript_225813;Transcript_228006
GO:0000139	C:Golgi_membrane	20	1.82902e-217	Transcript_008603;Transcript_010173;Transcript_017448;Transcript_018089;Transcript_019639;Transcript_020376;Transcript_026695;Transcript_032732;Transcript_094276;Transcript_130941;Transcript_152744;Transcript_161710;Transcript_165441;Transcript_167855;Transcript_194671;Transcript_195880;Transcript_199976;Transcript_201791;Transcript_204554;Transcript_207563
GO:0005730	C:nucleolus	17	1.52572e-207	Transcript_005103;Transcript_005619;Transcript_028268;Transcript_029064;Transcript_034522;Transcript_036865;Transcript_041930;Transcript_046126;Transcript_053224;Transcript_085531;Transcript_104878;Transcript_146566;Transcript_153778;Transcript_168654;Transcript_194105;Transcript_207565;Transcript_234481
GO:0006952	P:defense_response	11	1.06523e-189	Transcript_006356;Transcript_030483;Transcript_072565;Transcript_085531;Transcript_106701;Transcript_137017;Transcript_151424;Transcript_188595;Transcript_197339;Transcript_201475;Transcript_205166
GO:0005618	C:cell_wall_	12	2.24701e-185	Transcript_013109;Transcript_017904;Transcript_030020;Transcript_044266;Transcript_150334;Transcript_169444;Transcript_170093;Transcript_174303;Transcript_205169;Transcript_227236;Transcript_234481;Transcript_235233
GO:0009570	C:chloroplast_stroma	17	3.79009e-184	Transcript_005103;Transcript_010419;Transcript_013189;Transcript_014869;Transcript_017184;Transcript_028700;Transcript_036840;Transcript_090816;Transcript_148938;Transcript_157654;Transcript_178011;Transcript_187961;Transcript_188020;Transcript_198376;Transcript_213209;Transcript_230129;Transcript_232311
GO:0016874	F:ligase_activity	21	1.83988e-178	Transcript_004984;Transcript_005266;Transcript_005619;Transcript_008818;Transcript_014701;Transcript_015018;Transcript_017154;Transcript_027334;Transcript_030483;Transcript_044064;Transcript_104470;Transcript_109426;Transcript_139256;Transcript_151424;Transcript_167609;Transcript_171852;Transcript_191732;Transcript_207574;Transcript_218433;Transcript_225813;Transcript_232803
GO:0005525	F:GTP_binding	12	8.82426e-175	Transcript_014869;Transcript_019030;Transcript_023041;Transcript_026130;Transcript_026510;Transcript_031089;Transcript_043054;Transcript_070575;Transcript_103018;Transcript_232311;Transcript_234064;Transcript_234101
GO:0015031	P:protein_transport	15	9.28823e-175	Transcript_011312;Transcript_016956;Transcript_018886;Transcript_020323;Transcript_026695;Transcript_041952;Transcript_044956;Transcript_089751;Transcript_146566;Transcript_155115;Transcript_191915;Transcript_198729;Transcript_207563;Transcript_234101;Transcript_242447
GO:0046777	P:protein_autophosphorylation	17	1.57305e-173	Transcript_003957;Transcript_006961;Transcript_014701;Transcript_017628;Transcript_031135;Transcript_034289;Transcript_044618;Transcript_053308;Transcript_070575;Transcript_123901;Transcript_133653;Transcript_148938;Transcript_152640;Transcript_154532;Transcript_169084;Transcript_202003;Transcript_229195
GO:0005774	C:vacuolar_membrane	14	3.35105e-173	Transcript_016956;Transcript_019570;Transcript_019639;Transcript_029884;Transcript_034289;Transcript_079175;Transcript_114412;Transcript_121498;Transcript_157041;Transcript_161599;Transcript_201827;Transcript_207269;Transcript_222135;Transcript_234212
GO:0005773	C:vacuole	14	6.05263e-172	Transcript_006455;Transcript_013446;Transcript_013751;Transcript_015717;Transcript_016956;Transcript_018878;Transcript_029884;Transcript_114412;Transcript_154532;Transcript_161599;Transcript_169445;Transcript_186964;Transcript_198874;Transcript_207269
ko03010	Ribosome	9	2.63052e-171	Transcript_028268;Transcript_029064;Transcript_029884;Transcript_030079;Transcript_034145;Transcript_034522;Transcript_036865;Transcript_041930;Transcript_230129
GO:0005840	C:ribosome_	14	1.57777e-160	Transcript_015422;Transcript_019621;Transcript_021575;Transcript_029064;Transcript_036865;Transcript_069732;Transcript_111339;Transcript_165440;Transcript_169483;Transcript_201479;Transcript_204080;Transcript_206649;Transcript_208291;Transcript_230129
GO:0031625	F:ubiquitin_protein_ligase_binding	12	1.07187e-145	Transcript_003957;Transcript_006961;Transcript_017628;Transcript_031135;Transcript_034289;Transcript_044064;Transcript_044618;Transcript_053308;Transcript_154532;Transcript_167609;Transcript_169084;Transcript_229195
GO:0005975	P:carbohydrate_metabolic_process	14	2.21001e-144	Transcript_012691;Transcript_013109;Transcript_020714;Transcript_032093;Transcript_033387;Transcript_050448;Transcript_072565;Transcript_170776;Transcript_174303;Transcript_185930;Transcript_186471;Transcript_186964;Transcript_197339;Transcript_205169
GO:0000166	F:nucleotide_binding	19	1.94749e-143	Transcript_013778;Transcript_019621;Transcript_035672;Transcript_046126;Transcript_085531;Transcript_102209;Transcript_131087;Transcript_131197;Transcript_181887;Transcript_190556;Transcript_201765;Transcript_201827;Transcript_203844;Transcript_220314;Transcript_226835;Transcript_231636;Transcript_237710;Transcript_241824;Transcript_243637
GO:0009941	C:chloroplast_envelope	8	3.81483e-138	Transcript_028700;Transcript_090816;Transcript_099826;Transcript_153991;Transcript_188020;Transcript_194031;Transcript_230129;Transcript_236960
GO:0009535	C:chloroplast_thylakoid_membrane	13	4.33697e-137	Transcript_023063;Transcript_035649;Transcript_036840;Transcript_056651;Transcript_099826;Transcript_100826;Transcript_153991;Transcript_156028;Transcript_188020;Transcript_195280;Transcript_198875;Transcript_220081;Transcript_232311
GO:0009651	P:response_to_salt_stress	12	1.24585e-136	Transcript_007373;Transcript_013021;Transcript_016956;Transcript_028226;Transcript_085954;Transcript_090131;Transcript_093975;Transcript_139274;Transcript_158761;Transcript_163031;Transcript_190222;Transcript_235460
GO:0071555	P:cell_wall_organization	13	1.61497e-133	Transcript_003949;Transcript_010173;Transcript_017904;Transcript_020376;Transcript_030020;Transcript_055095;Transcript_090131;Transcript_097235;Transcript_152744;Transcript_169444;Transcript_170093;Transcript_174303;Transcript_231441
ko01200	Carbon_metabolism	7	2.84582e-132	Transcript_035652;Transcript_046002;Transcript_090816;Transcript_154295;Transcript_186303;Transcript_240627;Transcript_241534
GO:0005743	C:mitochondrial_inner_membrane	19	4.67115e-131	Transcript_002006;Transcript_011312;Transcript_017791;Transcript_018086;Transcript_027473;Transcript_042224;Transcript_044457;Transcript_090790;Transcript_096339;Transcript_102552;Transcript_110612;Transcript_129194;Transcript_150958;Transcript_151033;Transcript_151557;Transcript_159638;Transcript_227573;Transcript_227968;Transcript_244637
GO:0005768	C:endosome_	14	1.70355e-123	Transcript_008603;Transcript_010173;Transcript_016723;Transcript_017184;Transcript_019639;Transcript_020376;Transcript_035136;Transcript_044618;Transcript_130941;Transcript_140349;Transcript_194671;Transcript_195880;Transcript_203858;Transcript_204554
GO:0005509	F:calcium_ion_binding	14	2.03424e-122	Transcript_013751;Transcript_022911;Transcript_026249;Transcript_026328;Transcript_026702;Transcript_036840;Transcript_050448;Transcript_085549;Transcript_100826;Transcript_150958;Transcript_156028;Transcript_203180;Transcript_205166;Transcript_225884
GO:0005654	C:nucleoplasm	17	4.57392e-118	Transcript_005547;Transcript_020644;Transcript_026141;Transcript_032544;Transcript_041952;Transcript_046126;Transcript_053224;Transcript_054998;Transcript_057485;Transcript_063944;Transcript_083500;Transcript_123901;Transcript_146566;Transcript_165408;Transcript_181887;Transcript_242447;Transcript_242479
GO:0070062	C:extracellular_exosome	14	2.73844e-117	Transcript_003866;Transcript_005547;Transcript_009846;Transcript_022374;Transcript_024307;Transcript_026141;Transcript_033387;Transcript_034685;Transcript_056993;Transcript_084534;Transcript_123901;Transcript_199136;Transcript_232172;Transcript_234047
ko01230	Biosynthesis_of_amino_acids	8	3.26238e-116	Transcript_006354;Transcript_014426;Transcript_017184;Transcript_022231;Transcript_046002;Transcript_178011;Transcript_198376;Transcript_240627
GO:0004842	F:ubiquitin-protein_transferase_activity	13	8.67615e-116	Transcript_004984;Transcript_005619;Transcript_014701;Transcript_017154;Transcript_027334;Transcript_028065;Transcript_030483;Transcript_044064;Transcript_109426;Transcript_167609;Transcript_171852;Transcript_191732;Transcript_232803
GO:0001653	F:peptide_receptor_activity	10	2.32944e-114	Transcript_003957;Transcript_006961;Transcript_017628;Transcript_031135;Transcript_034289;Transcript_044618;Transcript_053308;Transcript_154532;Transcript_169084;Transcript_229195
GO:0048046	C:apoplast_	8	1.2607e-112	Transcript_003949;Transcript_006455;Transcript_013109;Transcript_017904;Transcript_036840;Transcript_150334;Transcript_205169;Transcript_229020
GO:0009755	P:hormone-mediated_signaling_pathway	11	3.13684e-112	Transcript_003957;Transcript_006961;Transcript_017628;Transcript_031135;Transcript_034289;Transcript_044618;Transcript_053308;Transcript_133653;Transcript_152640;Transcript_154532;Transcript_229195
GO:0004675	F:transmembrane_receptor_protein_serine/threonine_kinase_activity	10	7.37231e-112	Transcript_003957;Transcript_006961;Transcript_017628;Transcript_031135;Transcript_034289;Transcript_044618;Transcript_053308;Transcript_154532;Transcript_169084;Transcript_229195
GO:0007178	P:transmembrane_receptor_protein_serine/threonine_kinase_signaling_pathway	10	7.37231e-112	Transcript_003957;Transcript_006961;Transcript_017628;Transcript_031135;Transcript_034289;Transcript_044618;Transcript_053308;Transcript_154532;Transcript_169084;Transcript_229195
ko04141	Protein_processing_in_endoplasmic_reticulum	14	1.32484e-111	Transcript_004775;Transcript_008818;Transcript_022911;Transcript_026328;Transcript_044064;Transcript_146566;Transcript_161710;Transcript_175752;Transcript_202003;Transcript_207565;Transcript_228577;Transcript_237255;Transcript_239938;Transcript_244520
GO:0005506	F:iron_ion_binding	11	3.78264e-110	Transcript_006381;Transcript_008834;Transcript_024307;Transcript_034277;Transcript_075155;Transcript_090790;Transcript_141681;Transcript_150337;Transcript_161381;Transcript_194031;Transcript_234615
GO:0006886	P:intracellular_protein_transport	6	3.84428e-108	Transcript_026510;Transcript_043054;Transcript_047542;Transcript_103018;Transcript_161710;Transcript_175654
GO:0051301	P:cell_division	15	2.80757e-107	Transcript_018550;Transcript_027334;Transcript_083500;Transcript_093975;Transcript_140079;Transcript_146566;Transcript_153778;Transcript_159115;Transcript_162434;Transcript_163580;Transcript_175654;Transcript_223347;Transcript_228006;Transcript_229020;Transcript_234481
GO:0020037	F:heme_binding	10	1.11775e-106	Transcript_006381;Transcript_027305;Transcript_034277;Transcript_075155;Transcript_090790;Transcript_141681;Transcript_161381;Transcript_194031;Transcript_198439;Transcript_230648
GO:0006457	P:protein_folding	8	1.24458e-106	Transcript_000349;Transcript_007908;Transcript_022911;Transcript_034648;Transcript_056651;Transcript_190598;Transcript_207565;Transcript_222876
GO:0043565	F:sequence-specific_DNA_binding	9	2.75e-105	Transcript_006356;Transcript_021463;Transcript_021826;Transcript_036221;Transcript_059815;Transcript_084933;Transcript_113094;Transcript_158761;Transcript_237619
GO:0003924	F:GTPase_activity	4	4.40839e-105	Transcript_014869;Transcript_019030;Transcript_023041;Transcript_232311
GO:0005802	C:trans-Golgi_network	13	1.61741e-102	Transcript_008603;Transcript_010173;Transcript_016723;Transcript_017184;Transcript_019639;Transcript_020376;Transcript_035136;Transcript_130941;Transcript_140349;Transcript_194671;Transcript_195880;Transcript_203858;Transcript_204554
GO:0016491	F:oxidoreductase_activity	11	6.51057e-101	Transcript_005249;Transcript_016788;Transcript_026046;Transcript_034648;Transcript_089751;Transcript_122407;Transcript_150337;Transcript_190900;Transcript_222136;Transcript_228197;Transcript_234615
GO:0016787	F:hydrolase_activity	8	7.01394e-100	Transcript_018886;Transcript_026510;Transcript_033139;Transcript_088350;Transcript_118543;Transcript_146566;Transcript_198874;Transcript_237710
GO:0007275	P:multicellular_organismal_development	6	3.94873e-96	Transcript_009806;Transcript_016282;Transcript_017434;Transcript_029064;Transcript_209451;Transcript_216339
GO:0004672	F:protein_kinase_activity	7	8.39641e-95	Transcript_123901;Transcript_133653;Transcript_149488;Transcript_152640;Transcript_169291;Transcript_191498;Transcript_225598
GO:0046686	P:response_to_cadmium_ion	4	1.30105e-91	Transcript_005619;Transcript_033768;Transcript_146566;Transcript_151033
GO:0009737	P:response_to_abscisic_acid	13	6.1666e-89	Transcript_006967;Transcript_016956;Transcript_032683;Transcript_041388;Transcript_085954;Transcript_153991;Transcript_158761;Transcript_163031;Transcript_169445;Transcript_190222;Transcript_193266;Transcript_235460;Transcript_238213
GO:0042742	P:defense_response_to_bacterium	3	5.85346e-88	Transcript_005619;Transcript_018071;Transcript_113094
GO:0044822	F:poly(A)_RNA_binding	13	9.38953e-88	Transcript_020644;Transcript_026141;Transcript_032544;Transcript_046126;Transcript_053224;Transcript_084126;Transcript_084534;Transcript_130786;Transcript_185787;Transcript_194105;Transcript_199136;Transcript_205045;Transcript_236828
GO:0009409	P:response_to_cold	8	1.30672e-86	Transcript_027562;Transcript_028226;Transcript_041388;Transcript_157821;Transcript_158761;Transcript_163031;Transcript_190222;Transcript_241737
GO:0006397	P:mRNA_processing	17	1.4652e-86	Transcript_012381;Transcript_032544;Transcript_032946;Transcript_035672;Transcript_090153;Transcript_102209;Transcript_120759;Transcript_195069;Transcript_197101;Transcript_200172;Transcript_201765;Transcript_202003;Transcript_203844;Transcript_220314;Transcript_226835;Transcript_240948;Transcript_243637
GO:0000287	F:magnesium_ion_binding_	9	5.68902e-85	Transcript_003866;Transcript_014869;Transcript_017434;Transcript_022231;Transcript_026157;Transcript_046591;Transcript_070575;Transcript_166578;Transcript_222358
GO:0005874	C:microtubule	9	4.81585e-82	Transcript_019030;Transcript_070575;Transcript_087121;Transcript_090178;Transcript_112590;Transcript_169676;Transcript_222074;Transcript_232311;Transcript_234481
ko03013	RNA_transport	4	1.51155e-79	Transcript_021451;Transcript_041927;Transcript_059095;Transcript_185787
GO:0009734	P:auxin-activated_signaling_pathway	9	8.11215e-79	Transcript_002570;Transcript_009806;Transcript_019191;Transcript_026446;Transcript_030947;Transcript_123186;Transcript_146007;Transcript_149488;Transcript_162514
GO:0009414	P:response_to_water_deprivation	10	7.5888e-77	Transcript_021463;Transcript_028226;Transcript_030483;Transcript_032683;Transcript_114412;Transcript_157821;Transcript_158761;Transcript_163031;Transcript_171852;Transcript_190222
GO:0016192	P:vesicle-mediated_transport	7	1.03576e-76	Transcript_018886;Transcript_035136;Transcript_043054;Transcript_047542;Transcript_103018;Transcript_222074;Transcript_222135
ko05016	Huntington's_disease	10	1.75086e-76	Transcript_002006;Transcript_016808;Transcript_017791;Transcript_158543;Transcript_165898;Transcript_190451;Transcript_196980;Transcript_201274;Transcript_214542;Transcript_227968
ko05169	Epstein-Barr_virus_infection	6	1.77014e-76	Transcript_190451;Transcript_201274;Transcript_214542;Transcript_223347;Transcript_226137;Transcript_235627
GO:0055085	P:transmembrane_transport	3	5.2083e-76	Transcript_042224;Transcript_079175;Transcript_151033
ko03040	Spliceosome	15	6.5452e-76	Transcript_032544;Transcript_045261;Transcript_085531;Transcript_120759;Transcript_131087;Transcript_200172;Transcript_201765;Transcript_203844;Transcript_205045;Transcript_216132;Transcript_220314;Transcript_226835;Transcript_235840;Transcript_236828;Transcript_238363
ko00190	Oxidative_phosphorylation	8	1.14436e-75	Transcript_002006;Transcript_016808;Transcript_017791;Transcript_027473;Transcript_158543;Transcript_165898;Transcript_196980;Transcript_227968
ko00500	Starch_and_sucrose_metabolism	2	2.19646e-75	Transcript_050448;Transcript_170776
GO:0042803	F:protein_homodimerization_activity	8	2.78759e-75	Transcript_000812;Transcript_003866;Transcript_006967;Transcript_027334;Transcript_186303;Transcript_200447;Transcript_206393;Transcript_236960
ko04120	Ubiquitin_mediated_proteolysis	8	1.00621e-74	Transcript_008818;Transcript_028065;Transcript_044064;Transcript_057485;Transcript_097307;Transcript_167609;Transcript_181481;Transcript_228006
GO:0006979	P:response_to_oxidative_stress	7	6.94653e-74	Transcript_006455;Transcript_007373;Transcript_022198;Transcript_027305;Transcript_158761;Transcript_163031;Transcript_230648
ko04144	Endocytosis	7	9.33973e-73	Transcript_018886;Transcript_024907;Transcript_031951;Transcript_043054;Transcript_103018;Transcript_140349;Transcript_198729
GO:0006810	P:transport	2	1.25165e-71	Transcript_211177;Transcript_227573
GO:0005622	C:intracellular_	6	3.35879e-71	Transcript_045046;Transcript_070575;Transcript_232902;Transcript_234047;Transcript_234101;Transcript_241513
GO:0006281	P:DNA_repair	8	9.05728e-71	Transcript_005619;Transcript_054998;Transcript_165408;Transcript_167609;Transcript_168654;Transcript_186471;Transcript_187202;Transcript_204936
GO:0003676	F:nucleic_acid_binding	10	1.17625e-70	Transcript_014569;Transcript_019168;Transcript_090153;Transcript_169085;Transcript_174245;Transcript_181481;Transcript_201274;Transcript_216132;Transcript_235627;Transcript_242479
GO:0055114	P:oxidation-reduction_process	11	5.72567e-69	Transcript_019202;Transcript_022975;Transcript_028226;Transcript_034277;Transcript_034648;Transcript_157574;Transcript_165898;Transcript_167468;Transcript_188426;Transcript_195280;Transcript_229288
GO:0005777	C:peroxisome	7	1.83801e-68	Transcript_003866;Transcript_007798;Transcript_014711;Transcript_026046;Transcript_030311;Transcript_147537;Transcript_157041
GO:0009536	C:plastid	9	4.11847e-68	Transcript_013189;Transcript_020323;Transcript_026130;Transcript_096339;Transcript_148938;Transcript_165017;Transcript_188020;Transcript_200447;Transcript_216128
ko04075	Plant_hormone_signal_transduction	12	1.14801e-67	Transcript_005266;Transcript_006967;Transcript_016726;Transcript_018071;Transcript_026446;Transcript_030947;Transcript_050482;Transcript_123186;Transcript_139256;Transcript_140079;Transcript_162434;Transcript_230386
GO:0005615	C:extracellular_space_	7	2.37838e-67	Transcript_043104;Transcript_091504;Transcript_105109;Transcript_150334;Transcript_155035;Transcript_190250;Transcript_229020
GO:0030246	F:carbohydrate_binding_	9	8.05834e-67	Transcript_006961;Transcript_012691;Transcript_013109;Transcript_022911;Transcript_031657;Transcript_034685;Transcript_154532;Transcript_155035;Transcript_205169
GO:0009738	P:abscisic_acid-activated_signaling_pathway	3	8.62528e-67	Transcript_006967;Transcript_016726;Transcript_191498
GO:0016887	F:ATPase_activity	6	1.49771e-66	Transcript_005547;Transcript_013189;Transcript_112590;Transcript_169676;Transcript_230101;Transcript_238473
GO:0009908	P:flower_development	10	2.66087e-65	Transcript_015426;Transcript_018071;Transcript_021802;Transcript_026446;Transcript_027562;Transcript_095035;Transcript_124077;Transcript_152823;Transcript_224989;Transcript_232909
GO:0045893	P:positive_regulation_of_transcription,_DNA-templated	6	4.48844e-65	Transcript_009846;Transcript_021463;Transcript_027562;Transcript_093975;Transcript_095035;Transcript_113094
GO:0019843	F:rRNA_binding	4	3.79745e-64	Transcript_021575;Transcript_036865;Transcript_169483;Transcript_230129
GO:0009793	P:embryo_development_ending_in_seed_dormancy	13	7.6123e-64	Transcript_002570;Transcript_007373;Transcript_014869;Transcript_026446;Transcript_163580;Transcript_169084;Transcript_178011;Transcript_188020;Transcript_198729;Transcript_200447;Transcript_222074;Transcript_228006;Transcript_234064
ko00520	Amino_sugar_and_nucleotide_sugar_metabolism	8	9.8966e-64	Transcript_003949;Transcript_034685;Transcript_090131;Transcript_155035;Transcript_185930;Transcript_186471;Transcript_186964;Transcript_231441
ko00230	Purine_metabolism	12	2.26928e-62	Transcript_018441;Transcript_030611;Transcript_054998;Transcript_070575;Transcript_188654;Transcript_190451;Transcript_201274;Transcript_201923;Transcript_204142;Transcript_214542;Transcript_234047;Transcript_242859
GO:0045454	P:cell_redox_homeostasis	3	5.31632e-62	Transcript_090816;Transcript_146007;Transcript_213209
GO:0005887	C:integral_component_of_plasma_membrane_	8	1.50757e-61	Transcript_018878;Transcript_161599;Transcript_169445;Transcript_192811;Transcript_192923;Transcript_206885;Transcript_228063;Transcript_232902
GO:0006633	P:fatty_acid_biosynthetic_process	4	7.96036e-61	Transcript_012173;Transcript_150337;Transcript_165898;Transcript_234615
GO:0030154	P:cell_differentiation	6	2.55784e-60	Transcript_002570;Transcript_015426;Transcript_053308;Transcript_152823;Transcript_171519;Transcript_232909
GO:0043531	F:ADP_binding_	3	3.49439e-60	Transcript_106701;Transcript_188595;Transcript_224237
GO:0006470	P:protein_dephosphorylation	3	5.32281e-60	Transcript_005103;Transcript_190222;Transcript_230386
GO:0022626	C:cytosolic_ribosome	3	4.65599e-59	Transcript_025794;Transcript_034145;Transcript_207269
GO:0005215	F:transporter_activity	4	4.05087e-58	Transcript_013189;Transcript_026695;Transcript_151033;Transcript_183424
GO:0007049	P:cell_cycle_	8	4.1162e-58	Transcript_018550;Transcript_018886;Transcript_093975;Transcript_146566;Transcript_153778;Transcript_162434;Transcript_175654;Transcript_232311
GO:0009611	P:response_to_wounding	4	4.40136e-58	Transcript_085954;Transcript_114412;Transcript_158761;Transcript_222358
ko05012	Parkinson's_disease	10	1.07455e-57	Transcript_002006;Transcript_016808;Transcript_017791;Transcript_027473;Transcript_028065;Transcript_044064;Transcript_158543;Transcript_165898;Transcript_196980;Transcript_227968
GO:0009408	P:response_to_heat	5	2.17441e-57	Transcript_021463;Transcript_028700;Transcript_059815;Transcript_163031;Transcript_207565
GO:0006511	P:ubiquitin-dependent_protein_catabolic_process	4	3.38361e-57	Transcript_013641;Transcript_044064;Transcript_167609;Transcript_244520
ko05010	Alzheimer's_disease	9	5.20908e-57	Transcript_002006;Transcript_016808;Transcript_017791;Transcript_030311;Transcript_158543;Transcript_165898;Transcript_196980;Transcript_202003;Transcript_227968
GO:0008380	P:RNA_splicing	12	1.30541e-56	Transcript_020644;Transcript_032544;Transcript_032946;Transcript_102209;Transcript_120759;Transcript_181887;Transcript_200172;Transcript_201765;Transcript_202003;Transcript_203844;Transcript_220314;Transcript_226835
GO:0009873	P:ethylene-activated_signaling_pathway	4	1.72201e-56	Transcript_029855;Transcript_183975;Transcript_203858;Transcript_237619
ko04626	Plant-pathogen_interaction	5	1.83493e-56	Transcript_022515;Transcript_192811;Transcript_203180;Transcript_207565;Transcript_225884
GO:0004190	F:aspartic-type_endopeptidase_activity_	7	4.81943e-56	Transcript_014569;Transcript_019168;Transcript_125911;Transcript_152354;Transcript_169085;Transcript_196075;Transcript_196525
GO:0005507	F:copper_ion_binding	7	1.59369e-55	Transcript_005249;Transcript_016788;Transcript_017791;Transcript_157574;Transcript_195280;Transcript_198376;Transcript_203858
ko00010	Glycolysis_/_Gluconeogenesis	2	2.52914e-54	Transcript_046002;Transcript_090816
GO:0009733	P:response_to_auxin	7	7.59115e-53	Transcript_005266;Transcript_026446;Transcript_032683;Transcript_041388;Transcript_123186;Transcript_139256;Transcript_235460
GO:0031969	C:chloroplast_membrane_	3	9.51192e-53	Transcript_165017;Transcript_183424;Transcript_194031
ko05203	Viral_carcinogenesis	5	1.06752e-52	Transcript_095035;Transcript_181481;Transcript_223347;Transcript_235627;Transcript_243744
ko03015	mRNA_surveillance_pathway	3	1.3606e-52	Transcript_012381;Transcript_047178;Transcript_124077
GO:0005681	C:spliceosomal_complex	7	1.77012e-52	Transcript_045261;Transcript_120759;Transcript_181887;Transcript_200172;Transcript_203844;Transcript_205045;Transcript_236828
GO:0004252	F:serine-type_endopeptidase_activity	2	5.37811e-52	Transcript_207269;Transcript_220081
GO:0009505	C:plant-type_cell_wall	7	5.77595e-52	Transcript_006455;Transcript_015691;Transcript_050046;Transcript_139274;Transcript_150334;Transcript_169444;Transcript_186964
GO:0005759	C:mitochondrial_matrix_	4	7.88029e-52	Transcript_136647;Transcript_165898;Transcript_208325;Transcript_241534
GO:0009055	F:electron_carrier_activity	2	8.17451e-52	Transcript_019202;Transcript_195280
GO:0006468	P:protein_phosphorylation	7	8.72553e-52	Transcript_017434;Transcript_070575;Transcript_123901;Transcript_149488;Transcript_169084;Transcript_169578;Transcript_225598
ko03018	RNA_degradation	8	5.1119e-51	Transcript_015722;Transcript_085550;Transcript_120759;Transcript_197101;Transcript_199136;Transcript_208330;Transcript_240948;Transcript_241513
GO:0051287	F:NAD_binding	3	5.49921e-51	Transcript_022231;Transcript_035652;Transcript_186303
GO:0004722	F:protein_serine/threonine_phosphatase_activity	3	5.49921e-51	Transcript_005103;Transcript_190222;Transcript_230386
GO:0007165	P:signal_transduction	4	6.31383e-51	Transcript_010386;Transcript_014885;Transcript_017434;Transcript_029593
GO:0006364	P:rRNA_processing	3	1.92847e-50	Transcript_014869;Transcript_053224;Transcript_085550
GO:0003743	F:translation_initiation_factor_activity	5	6.93134e-50	Transcript_023041;Transcript_041927;Transcript_044761;Transcript_059095;Transcript_185787
GO:0009534	C:chloroplast_thylakoid	5	6.93134e-50	Transcript_036840;Transcript_099826;Transcript_153991;Transcript_157654;Transcript_188020
GO:0007067	P:mitotic_nuclear_division	7	7.57695e-50	Transcript_070575;Transcript_090178;Transcript_140079;Transcript_222074;Transcript_223347;Transcript_228006;Transcript_234481
GO:0016042	P:lipid_catabolic_process	5	1.04509e-49	Transcript_013751;Transcript_019393;Transcript_033032;Transcript_190250;Transcript_229288
ko04110	Cell_cycle	4	3.62077e-49	Transcript_028266;Transcript_222074;Transcript_223347;Transcript_228006
ko04145	Phagosome	2	3.86656e-49	Transcript_022911;Transcript_239938
GO:0050660	F:flavin_adenine_dinucleotide_binding	6	1.05272e-48	Transcript_006455;Transcript_090816;Transcript_091504;Transcript_136647;Transcript_203920;Transcript_238909
GO:0031225	C:anchored_component_of_membrane_	9	1.57868e-48	Transcript_005249;Transcript_006455;Transcript_016723;Transcript_139274;Transcript_149202;Transcript_152354;Transcript_155519;Transcript_195279;Transcript_197339
ko04932	Non-alcoholic_fatty_liver_disease_(NAFLD)	8	2.19131e-48	Transcript_016808;Transcript_017791;Transcript_158543;Transcript_165898;Transcript_196980;Transcript_202003;Transcript_227968;Transcript_244520
GO:0015979	P:photosynthesis	5	2.70735e-48	Transcript_036840;Transcript_099826;Transcript_100826;Transcript_156028;Transcript_158761
GO:0043161	P:proteasome-mediated_ubiquitin-dependent_protein_catabolic_process	4	2.88168e-48	Transcript_016835;Transcript_151424;Transcript_167609;Transcript_232172
GO:0009579	C:thylakoid	7	9.97168e-48	Transcript_005103;Transcript_034648;Transcript_036840;Transcript_153991;Transcript_156028;Transcript_157654;Transcript_224719
GO:0005856	C:cytoskeleton	9	5.95072e-47	Transcript_029593;Transcript_031951;Transcript_046081;Transcript_094276;Transcript_123901;Transcript_146566;Transcript_200946;Transcript_232902;Transcript_243744
GO:0030170	F:pyridoxal_phosphate_binding	4	2.38923e-46	Transcript_021678;Transcript_161380;Transcript_190900;Transcript_240627
GO:0022625	C:cytosolic_large_ribosomal_subunit	4	1.25227e-45	Transcript_029884;Transcript_030079;Transcript_034145;Transcript_034522
GO:0010008	C:endosome_membrane_	5	3.82853e-45	Transcript_008603;Transcript_044618;Transcript_198729;Transcript_199976;Transcript_222135
ko04114	Oocyte_meiosis	2	2.38812e-44	Transcript_222074;Transcript_228006
ko03050	Proteasome	2	7.61748e-44	Transcript_226137;Transcript_232172
GO:0009555	P:pollen_development	6	1.30165e-43	Transcript_018071;Transcript_043034;Transcript_078594;Transcript_112590;Transcript_169676;Transcript_181667
ko04146	Peroxisome	2	1.72646e-43	Transcript_003866;Transcript_157041
ko00240	Pyrimidine_metabolism	12	2.19727e-43	Transcript_016858;Transcript_018441;Transcript_031089;Transcript_054998;Transcript_070575;Transcript_190451;Transcript_201274;Transcript_213733;Transcript_214542;Transcript_234047;Transcript_238909;Transcript_242859
ko04151	PI3K-Akt_signaling_pathway	2	2.61119e-43	Transcript_156614;Transcript_207565
GO:0006970	P:response_to_osmotic_stress	2	1.28039e-42	Transcript_007373;Transcript_146007
GO:0042802	F:identical_protein_binding	6	1.37794e-42	Transcript_010715;Transcript_026446;Transcript_161380;Transcript_169084;Transcript_169291;Transcript_232311
GO:0009705	C:plant-type_vacuole_membrane	2	1.91568e-42	Transcript_020623;Transcript_230671
ko04152	AMPK_signaling_pathway	3	2.41464e-42	Transcript_156614;Transcript_223347;Transcript_225598
ko00620	Pyruvate_metabolism	5	3.41593e-42	Transcript_018642;Transcript_090816;Transcript_136647;Transcript_154295;Transcript_186303
GO:0004497	F:monooxygenase_activity	3	8.48603e-42	Transcript_006381;Transcript_141681;Transcript_161381
GO:0016757	F:transferase_activity,_transferring_glycosyl_groups_	8	1.20227e-41	Transcript_001446;Transcript_010173;Transcript_020376;Transcript_030020;Transcript_031089;Transcript_130941;Transcript_195880;Transcript_216339
GO:0035556	P:intracellular_signal_transduction	3	2.61587e-41	Transcript_017434;Transcript_123901;Transcript_149488
GO:0000398	P:mRNA_splicing,_via_spliceosome	9	2.74776e-41	Transcript_025019;Transcript_032544;Transcript_045261;Transcript_069308;Transcript_126907;Transcript_131197;Transcript_181887;Transcript_205045;Transcript_238363
GO:0004386	F:helicase_activity	5	4.00813e-41	Transcript_044761;Transcript_104878;Transcript_202126;Transcript_240217;Transcript_240948
GO:0045892	P:negative_regulation_of_transcription,_DNA-templated	6	4.62504e-41	Transcript_016456;Transcript_059815;Transcript_118655;Transcript_123186;Transcript_158761;Transcript_237619
GO:0006897	P:endocytosis	2	1.61337e-40	Transcript_029440;Transcript_098689
GO:0009524	C:phragmoplast	8	2.0453e-39	Transcript_019030;Transcript_043034;Transcript_090178;Transcript_112590;Transcript_146566;Transcript_169676;Transcript_175654;Transcript_234481
ko00260	Glycine,_serine_and_threonine_metabolism	3	6.86759e-39	Transcript_035652;Transcript_090816;Transcript_240627
GO:0009753	P:response_to_jasmonic_acid	3	1.02379e-38	Transcript_018071;Transcript_235460;Transcript_237710
GO:0007264	P:small_GTPase_mediated_signal_transduction	4	1.03891e-38	Transcript_043054;Transcript_103018;Transcript_234064;Transcript_234101
GO:0016705	F:oxidoreductase_activity,_acting_on_paired_donors,_with_incorporation_or_reduction_of_molecular_oxygen	4	1.11949e-38	Transcript_006381;Transcript_141681;Transcript_161381;Transcript_193996
GO:0016301	F:kinase_activity	6	1.23262e-38	Transcript_026157;Transcript_070575;Transcript_149488;Transcript_156614;Transcript_179869;Transcript_225598
ko05166	HTLV-I_infection	7	1.92867e-38	Transcript_022911;Transcript_054998;Transcript_095035;Transcript_228006;Transcript_242447;Transcript_242859;Transcript_244520
ko01212	Fatty_acid_metabolism	4	2.29092e-38	Transcript_012173;Transcript_152573;Transcript_154295;Transcript_241534
ko04142	Lysosome	2	6.33025e-38	Transcript_033387;Transcript_186964
GO:0016568	P:chromatin_modification	2	6.82209e-37	Transcript_015868;Transcript_083500
GO:0016607	C:nuclear_speck	5	1.05402e-36	Transcript_020644;Transcript_032544;Transcript_169291;Transcript_203844;Transcript_205045
GO:0048364	P:root_development	6	1.27872e-36	Transcript_002570;Transcript_026446;Transcript_163580;Transcript_206885;Transcript_228063;Transcript_235658
GO:0008168	F:methyltransferase_activity	6	1.301e-35	Transcript_005332;Transcript_018089;Transcript_025338;Transcript_152745;Transcript_194671;Transcript_201923
GO:0051539	F:4_iron,_4_sulfur_cluster_binding	6	1.301e-35	Transcript_016808;Transcript_168654;Transcript_190556;Transcript_198439;Transcript_206393;Transcript_227968
GO:0009735	P:response_to_cytokinin	2	2.40267e-35	Transcript_002570;Transcript_140079
GO:0004519	F:endonuclease_activity	3	2.85636e-35	Transcript_019168;Transcript_169085;Transcript_196525
GO:0046658	C:anchored_component_of_plasma_membrane	7	3.08669e-35	Transcript_005249;Transcript_016723;Transcript_139274;Transcript_150312;Transcript_152354;Transcript_162265;Transcript_197339
GO:0006629	P:lipid_metabolic_process	4	4.11405e-35	Transcript_009042;Transcript_150312;Transcript_162265;Transcript_190250
GO:0006417	P:regulation_of_translation	4	6.17066e-35	Transcript_041927;Transcript_102209;Transcript_240948;Transcript_241513
GO:0016311	P:dephosphorylation	5	8.03914e-35	Transcript_003866;Transcript_005103;Transcript_015717;Transcript_150284;Transcript_154296
ko04111	Cell_cycle_-_yeast	3	8.94703e-35	Transcript_028266;Transcript_222074;Transcript_228006
GO:0022627	C:cytosolic_small_ribosomal_subunit_	4	1.29335e-34	Transcript_028268;Transcript_036865;Transcript_041930;Transcript_180432
ko00970	Aminoacyl-tRNA_biosynthesis	2	1.78942e-34	Transcript_084126;Transcript_084534
GO:0016032	P:viral_process	4	1.90992e-34	Transcript_075155;Transcript_185787;Transcript_201475;Transcript_225598
GO:0050661	F:NADP_binding	2	2.69452e-34	Transcript_032311;Transcript_178011
GO:0015293	F:symporter_activity	5	1.79987e-33	Transcript_022464;Transcript_030947;Transcript_164909;Transcript_217335;Transcript_230859
GO:0050662	F:coenzyme_binding	2	1.92817e-32	Transcript_003949;Transcript_241824
GO:0015991	P:ATP_hydrolysis_coupled_proton_transport	3	3.34258e-32	Transcript_002006;Transcript_015364;Transcript_032732
ko04013	MAPK_signaling_pathway_-_fly	2	1.40663e-31	Transcript_008818;Transcript_123901
GO:0005635	C:nuclear_envelope	4	1.41322e-31	Transcript_043034;Transcript_087121;Transcript_155115;Transcript_214753
ko05152	Tuberculosis	2	3.16795e-31	Transcript_015717;Transcript_208330
GO:0006260	P:DNA_replication	6	4.53069e-31	Transcript_014919;Transcript_017392;Transcript_153778;Transcript_165408;Transcript_187202;Transcript_190556
GO:0003755	F:peptidyl-prolyl_cis-trans_isomerase_activity	6	4.53069e-31	Transcript_000349;Transcript_002570;Transcript_005547;Transcript_034648;Transcript_190598;Transcript_222876
GO:0061630	F:ubiquitin_protein_ligase_activity	4	4.60677e-31	Transcript_005619;Transcript_044064;Transcript_057485;Transcript_167609
GO:0003964	F:RNA-directed_DNA_polymerase_activity	3	4.96899e-31	Transcript_019168;Transcript_169085;Transcript_196525
ko04666	Fc_gamma_R-mediated_phagocytosis	2	6.50863e-31	Transcript_031951;Transcript_243744
GO:0043547	P:positive_regulation_of_GTPase_activity	2	6.50863e-31	Transcript_031951;Transcript_059095
ko00680	Methane_metabolism	2	9.62772e-31	Transcript_046002;Transcript_240627
ko00561	Glycerolipid_metabolism	2	1.4275e-30	Transcript_190250;Transcript_229288
GO:0048471	C:perinuclear_region_of_cytoplasm	3	1.53618e-30	Transcript_044064;Transcript_161710;Transcript_232902
GO:0009909	P:regulation_of_flower_development	2	3.16061e-30	Transcript_021802;Transcript_041388
GO:0006486	P:protein_glycosylation	5	5.62322e-30	Transcript_004775;Transcript_017448;Transcript_097235;Transcript_165441;Transcript_237255
ko04212	Longevity_regulating_pathway_-_worm	3	7.35495e-30	Transcript_025019;Transcript_208330;Transcript_220081
ko00280	Valine,_leucine_and_isoleucine_degradation	5	8.33782e-30	Transcript_043932;Transcript_090816;Transcript_154295;Transcript_208325;Transcript_241534
ko00630	Glyoxylate_and_dicarboxylate_metabolism	4	1.00226e-29	Transcript_035652;Transcript_090816;Transcript_154295;Transcript_240627
GO:0010150	P:leaf_senescence	2	1.46865e-29	Transcript_085531;Transcript_238213
GO:0012505	C:endomembrane_system	3	3.66125e-29	Transcript_044618;Transcript_045046;Transcript_175654
GO:0070469	C:respiratory_chain	7	4.45707e-29	Transcript_017791;Transcript_027473;Transcript_090790;Transcript_102552;Transcript_165898;Transcript_227968;Transcript_244637
GO:0052689	F:carboxylic_ester_hydrolase_activity	3	4.98605e-29	Transcript_040695;Transcript_169444;Transcript_170093
GO:0004721	F:phosphoprotein_phosphatase_activity	3	4.98605e-29	Transcript_012381;Transcript_059985;Transcript_240875
GO:0015074	P:DNA_integration	4	6.69025e-29	Transcript_014569;Transcript_019168;Transcript_169085;Transcript_196525
ko05110	Vibrio_cholerae_infection	3	7.34444e-29	Transcript_043054;Transcript_103018;Transcript_239938
ko00480	Glutathione_metabolism	3	1.0844e-28	Transcript_008959;Transcript_033768;Transcript_230648
GO:0009416	P:response_to_light_stimulus	4	1.45339e-28	Transcript_005266;Transcript_032947;Transcript_095035;Transcript_139256
GO:0005096	F:GTPase_activator_activity_	2	1.55833e-28	Transcript_014885;Transcript_140349
GO:0007018	P:microtubule-based_movement	2	1.55833e-28	Transcript_112590;Transcript_169676
GO:0009751	P:response_to_salicylic_acid	2	3.48739e-28	Transcript_085954;Transcript_202003
GO:0010200	P:response_to_chitin	6	5.86765e-28	Transcript_030483;Transcript_059815;Transcript_113094;Transcript_151973;Transcript_158761;Transcript_237619
GO:0004185	F:serine-type_carboxypeptidase_activity	2	7.09225e-28	Transcript_020891;Transcript_050046
ko04113	Meiosis_-_yeast	3	1.18077e-27	Transcript_028266;Transcript_222074;Transcript_228006
ko04011	MAPK_signaling_pathway_-_yeast	2	1.54638e-27	Transcript_029440;Transcript_156614
GO:0031902	C:late_endosome_membrane	2	1.54638e-27	Transcript_024907;Transcript_044618
GO:0006310	P:DNA_recombination	2	1.54638e-27	Transcript_153778;Transcript_196525
ko00071	Fatty_acid_degradation	2	2.29104e-27	Transcript_154295;Transcript_241534
GO:0009826	P:unidimensional_cell_growth	4	3.08233e-27	Transcript_002570;Transcript_035136;Transcript_041388;Transcript_222074
GO:0018298	P:protein-chromophore_linkage	2	3.40188e-27	Transcript_023063;Transcript_035649
GO:0030244	P:cellulose_biosynthetic_process	3	3.45868e-27	Transcript_030020;Transcript_090131;Transcript_231441
ko00052	Galactose_metabolism	2	5.06259e-27	Transcript_020714;Transcript_163031
GO:0005871	C:kinesin_complex	2	5.06259e-27	Transcript_112590;Transcript_169676
ko00710	Carbon_fixation_in_photosynthetic_organisms	2	5.06259e-27	Transcript_046002;Transcript_186303
GO:0006888	P:ER_to_Golgi_vesicle-mediated_transport	3	5.11418e-27	Transcript_029593;Transcript_041952;Transcript_161710
GO:0005764	C:lysosome	2	1.12859e-26	Transcript_033387;Transcript_105109
ko00051	Fructose_and_mannose_metabolism	5	1.62481e-26	Transcript_032093;Transcript_046002;Transcript_166578;Transcript_185930;Transcript_227224
GO:0022857	F:transmembrane_transporter_activity	2	1.6905e-26	Transcript_162704;Transcript_230671
GO:0080167	P:response_to_karrikin	4	2.05153e-26	Transcript_004984;Transcript_087669;Transcript_164909;Transcript_193266
GO:0044212	F:transcription_regulatory_region_DNA_binding	4	2.05153e-26	Transcript_014648;Transcript_026446;Transcript_199136;Transcript_237619
GO:0042254	P:ribosome_biogenesis	2	2.28857e-26	Transcript_034522;Transcript_169483
GO:0051028	P:mRNA_transport	2	2.28857e-26	Transcript_240948;Transcript_242447
GO:0031965	C:nuclear_membrane_	2	3.36961e-26	Transcript_022464;Transcript_216128
ko05205	Proteoglycans_in_cancer	3	3.74114e-26	Transcript_029593;Transcript_156614;Transcript_232902
GO:0006887	P:exocytosis	4	4.39044e-26	Transcript_016956;Transcript_029593;Transcript_175654;Transcript_222074
GO:0006508	P:proteolysis	2	4.97198e-26	Transcript_026141;Transcript_207269
GO:0048366	P:leaf_development	3	1.08483e-25	Transcript_124077;Transcript_167303;Transcript_184034
GO:0009706	C:chloroplast_inner_membrane	7	1.13644e-25	Transcript_014869;Transcript_089751;Transcript_099826;Transcript_152745;Transcript_188020;Transcript_196785;Transcript_236960
ko04072	Phospholipase_D_signaling_pathway	2	3.59198e-25	Transcript_043054;Transcript_103018
GO:0006974	P:cellular_response_to_DNA_damage_stimulus	3	5.23204e-25	Transcript_016835;Transcript_190556;Transcript_200017
GO:0003729	F:mRNA_binding	4	6.77563e-25	Transcript_020644;Transcript_131087;Transcript_131197;Transcript_181887
ko03060	Protein_export	3	7.22344e-25	Transcript_044457;Transcript_056993;Transcript_239938
ko05134	Legionellosis	4	9.07537e-25	Transcript_043054;Transcript_103018;Transcript_146566;Transcript_208330
GO:0006811	P:ion_transport	2	1.06862e-24	Transcript_000812;Transcript_151033
GO:0018105	P:peptidyl-serine_phosphorylation	2	1.06862e-24	Transcript_029440;Transcript_070575
GO:0008137	F:NADH_dehydrogenase_(ubiquinone)_activity	3	1.54758e-24	Transcript_016808;Transcript_027473;Transcript_227968
GO:0045490	P:pectin_catabolic_process	3	1.54758e-24	Transcript_044266;Transcript_227236;Transcript_235233
GO:0016788	F:hydrolase_activity,_acting_on_ester_bonds	2	1.5736e-24	Transcript_019393;Transcript_033032
GO:0008233	F:peptidase_activity	2	2.32206e-24	Transcript_026141;Transcript_222074
ko00053	Ascorbate_and_aldarate_metabolism	2	3.43374e-24	Transcript_230648;Transcript_237710
GO:0004222	F:metalloendopeptidase_activity	3	4.9333e-24	Transcript_007313;Transcript_007889;Transcript_030311
ko04919	Thyroid_hormone_signaling_pathway	2	7.55577e-24	Transcript_095035;Transcript_156614
GO:0031201	C:SNARE_complex	2	7.55577e-24	Transcript_016956;Transcript_175654
ko00900	Terpenoid_backbone_biosynthesis	4	1.26943e-23	Transcript_043932;Transcript_046591;Transcript_154295;Transcript_242727
GO:0044281	P:small_molecule_metabolic_process	3	2.20034e-23	Transcript_003866;Transcript_026141;Transcript_033387
GO:0003777	F:microtubule_motor_activity	3	2.20034e-23	Transcript_087121;Transcript_112590;Transcript_169676
GO:0003899	F:DNA-directed_RNA_polymerase_activity	4	2.69919e-23	Transcript_004956;Transcript_190451;Transcript_201274;Transcript_214542
GO:0005875	C:microtubule_associated_complex	4	3.9491e-23	Transcript_002006;Transcript_069308;Transcript_070575;Transcript_159115
GO:0003746	F:translation_elongation_factor_activity	2	4.90166e-23	Transcript_013497;Transcript_041535
GO:0045087	P:innate_immune_response	2	1.06468e-22	Transcript_005619;Transcript_027334
GO:0042744	P:hydrogen_peroxide_catabolic_process	2	1.57394e-22	Transcript_027305;Transcript_230648
GO:0010228	P:vegetative_to_reproductive_phase_transition_of_meristem	3	2.20214e-22	Transcript_027334;Transcript_152823;Transcript_167609
GO:0000932	C:cytoplasmic_mRNA_processing_body	2	5.14641e-22	Transcript_102209;Transcript_240948
GO:0009965	P:leaf_morphogenesis	2	7.66825e-22	Transcript_027334;Transcript_084933
GO:0009742	P:brassinosteroid_mediated_signaling_pathway	4	7.88088e-22	Transcript_003957;Transcript_059985;Transcript_146007;Transcript_169084
ko04931	Insulin_resistance	5	1.76285e-21	Transcript_005547;Transcript_034685;Transcript_156614;Transcript_216339;Transcript_230386
ko00310	Lysine_degradation	3	2.05429e-21	Transcript_024307;Transcript_154295;Transcript_241534
GO:0009624	P:response_to_nematode	5	2.55058e-21	Transcript_090178;Transcript_114412;Transcript_165017;Transcript_167855;Transcript_199976
GO:0006869	P:lipid_transport	5	2.55058e-21	Transcript_013189;Transcript_020463;Transcript_061651;Transcript_067394;Transcript_069564
GO:0031966	C:mitochondrial_membrane	4	1.06495e-20	Transcript_032311;Transcript_188020;Transcript_196980;Transcript_227224
GO:0004197	F:cysteine-type_endopeptidase_activity	2	1.55342e-20	Transcript_105109;Transcript_222074
ko04972	Pancreatic_secretion	2	1.55342e-20	Transcript_013751;Transcript_190250
GO:0006950	P:response_to_stress	3	2.81847e-20	Transcript_022849;Transcript_032019;Transcript_224734
GO:0016758	F:transferase_activity,_transferring_hexosyl_groups	3	4.11104e-20	Transcript_010952;Transcript_115223;Transcript_142524
ko00510	N-Glycan_biosynthesis	3	4.11104e-20	Transcript_004775;Transcript_228577;Transcript_237255
ko04130	SNARE_interactions_in_vesicular_transport	2	4.5305e-20	Transcript_016956;Transcript_175654
GO:0007017	P:microtubule-based_process	2	6.63716e-20	Transcript_070575;Transcript_232311
GO:0005741	C:mitochondrial_outer_membrane_	3	8.79984e-20	Transcript_020323;Transcript_190900;Transcript_238473
GO:0042626	F:ATPase_activity,_coupled_to_transmembrane_movement_of_substances	3	8.79984e-20	Transcript_019570;Transcript_114412;Transcript_151033
GO:0015297	F:antiporter_activity	5	1.02127e-19	Transcript_147537;Transcript_157041;Transcript_161599;Transcript_165017;Transcript_192923
GO:0010467	P:gene_expression	2	1.43273e-19	Transcript_032544;Transcript_084534
GO:0009658	P:chloroplast_organization	7	2.7126e-19	Transcript_014869;Transcript_042490;Transcript_056651;Transcript_099826;Transcript_169291;Transcript_188020;Transcript_232311
GO:0005747	C:mitochondrial_respiratory_chain_complex_I_	4	2.99536e-19	Transcript_016808;Transcript_022975;Transcript_167468;Transcript_196980
GO:0005198	F:structural_molecule_activity	4	2.99536e-19	Transcript_029593;Transcript_041952;Transcript_047542;Transcript_151075
GO:0042542	P:response_to_hydrogen_peroxide	2	3.11649e-19	Transcript_028700;Transcript_163031
GO:0003697	F:single-stranded_DNA_binding	2	4.60932e-19	Transcript_004956;Transcript_017392
ko00400	Phenylalanine,_tyrosine_and_tryptophan_biosynthesis	5	4.61047e-19	Transcript_006354;Transcript_014426;Transcript_017184;Transcript_178011;Transcript_198376
ko05145	Toxoplasmosis	3	5.58565e-19	Transcript_156614;Transcript_203180;Transcript_225884
GO:0005623	C:cell_	2	1.34347e-18	Transcript_009948;Transcript_146007
GO:0030599	F:pectinesterase_activity	3	1.72397e-18	Transcript_044266;Transcript_227236;Transcript_235233
ko00380	Tryptophan_metabolism	2	1.96293e-18	Transcript_154295;Transcript_241534
ko00640	Propanoate_metabolism	3	2.52e-18	Transcript_090816;Transcript_154295;Transcript_241534
GO:0009744	P:response_to_sucrose	3	3.69086e-18	Transcript_084933;Transcript_140079;Transcript_169578
GO:0008017	F:microtubule_binding	3	3.69086e-18	Transcript_070575;Transcript_090178;Transcript_234481
GO:0005643	C:nuclear_pore	2	4.21406e-18	Transcript_214753;Transcript_242447
GO:0006396	P:RNA_processing	2	6.19175e-18	Transcript_124944;Transcript_199136
GO:0006906	P:vesicle_fusion	2	9.11442e-18	Transcript_016956;Transcript_175654
GO:0042787	P:protein_ubiquitination_involved_in_ubiquitin-dependent_protein_catabolic_process	2	9.11442e-18	Transcript_057485;Transcript_232803
GO:0046961	F:proton-transporting_ATPase_activity,_rotational_mechanism	2	1.98571e-17	Transcript_002006;Transcript_015364
GO:0000149	F:SNARE_binding	2	2.69226e-17	Transcript_016956;Transcript_175654
GO:0016226	P:iron-sulfur_cluster_assembly	2	2.69226e-17	Transcript_183214;Transcript_206393
ko04914	Progesterone-mediated_oocyte_maturation	3	3.32987e-17	Transcript_207565;Transcript_223347;Transcript_228006
GO:0009523	C:photosystem_II	2	3.91573e-17	Transcript_023063;Transcript_035649
GO:0004553	F:hydrolase_activity,_hydrolyzing_O-glycosyl_compounds	2	3.91573e-17	Transcript_017904;Transcript_170776
GO:0005778	C:peroxisomal_membrane	3	4.84816e-17	Transcript_147537;Transcript_170776;Transcript_230648
GO:0000911	P:cytokinesis_by_cell_plate_formation	5	5.04278e-17	Transcript_019030;Transcript_090178;Transcript_112590;Transcript_169676;Transcript_222074
GO:0051258	P:protein_polymerization	2	5.70547e-17	Transcript_193266;Transcript_232311
GO:0043066	P:negative_regulation_of_apoptotic_process	4	7.39184e-17	Transcript_009846;Transcript_057485;Transcript_234047;Transcript_244520
GO:0080008	C:Cul4-RING_E3_ubiquitin_ligase_complex	2	8.32837e-17	Transcript_057485;Transcript_169291
GO:0071013	C:catalytic_step_2_spliceosome_	5	1.06006e-16	Transcript_005619;Transcript_032544;Transcript_069308;Transcript_131197;Transcript_236828
GO:0009585	P:red,_far-red_light_phototransduction	4	1.0649e-16	Transcript_021463;Transcript_041388;Transcript_169291;Transcript_181481
ko04210	Apoptosis	2	1.21792e-16	Transcript_156614;Transcript_202003
GO:0009911	P:positive_regulation_of_flower_development	2	1.21792e-16	Transcript_027562;Transcript_152823
GO:0009739	P:response_to_gibberellin	2	1.7843e-16	Transcript_009806;Transcript_027562
GO:0005813	C:centrosome_	2	1.7843e-16	Transcript_060566;Transcript_222074
ko03320	PPAR_signaling_pathway	2	1.7843e-16	Transcript_013641;Transcript_156614
ko05161	Hepatitis_B	2	1.7843e-16	Transcript_181481;Transcript_223347
ko03420	Nucleotide_excision_repair	4	2.22336e-16	Transcript_054998;Transcript_153778;Transcript_181481;Transcript_242859
ko03020	RNA_polymerase	3	3.26383e-16	Transcript_190451;Transcript_201274;Transcript_214542
GO:0009522	C:photosystem_I	2	3.85035e-16	Transcript_023063;Transcript_035649
GO:0010114	P:response_to_red_light	2	3.85035e-16	Transcript_029855;Transcript_169291
GO:0051603	P:proteolysis_involved_in_cellular_protein_catabolic_process	2	5.67103e-16	Transcript_030311;Transcript_105109
GO:0003887	F:DNA-directed_DNA_polymerase_activity	6	5.8726e-16	Transcript_054998;Transcript_155116;Transcript_165408;Transcript_190556;Transcript_196525;Transcript_242859
GO:0048481	P:ovule_development	2	7.72858e-16	Transcript_015426;Transcript_228006
GO:0006338	P:chromatin_remodeling	2	7.72858e-16	Transcript_029854;Transcript_242479
GO:0016168	F:chlorophyll_binding	2	7.72858e-16	Transcript_023063;Transcript_035649
GO:0048316	P:seed_development	3	9.18822e-16	Transcript_015426;Transcript_140079;Transcript_162434
GO:0048544	P:recognition_of_pollen	3	9.18822e-16	Transcript_006961;Transcript_030477;Transcript_154532
ko04612	Antigen_processing_and_presentation	2	1.12094e-15	Transcript_022911;Transcript_207565
GO:0008236	F:serine-type_peptidase_activity	2	1.12094e-15	Transcript_010715;Transcript_056993
ko00513	Various_types_of_N-glycan_biosynthesis	4	1.44971e-15	Transcript_004775;Transcript_097235;Transcript_228577;Transcript_237255
GO:0016055	P:Wnt_signaling_pathway	2	1.62865e-15	Transcript_029440;Transcript_123901
GO:0019898	C:extrinsic_component_of_membrane	5	1.88683e-15	Transcript_036840;Transcript_045046;Transcript_100826;Transcript_148177;Transcript_156028
GO:0042545	P:cell_wall_modification	3	1.94329e-15	Transcript_044266;Transcript_227236;Transcript_235233
GO:0009543	C:chloroplast_thylakoid_lumen_	6	2.31501e-15	Transcript_034648;Transcript_035637;Transcript_156028;Transcript_190598;Transcript_222876;Transcript_224719
GO:0007052	P:mitotic_spindle_organization	2	2.37049e-15	Transcript_036865;Transcript_181887
GO:0043621	F:protein_self-association	3	4.14076e-15	Transcript_056651;Transcript_123900;Transcript_232311
GO:0030176	C:integral_component_of_endoplasmic_reticulum_membrane	2	5.0486e-15	Transcript_190551;Transcript_244520
GO:0030433	P:ER-associated_ubiquitin-dependent_protein_catabolic_process	3	6.06086e-15	Transcript_026328;Transcript_175752;Transcript_228577
GO:0051726	P:regulation_of_cell_cycle	2	7.38729e-15	Transcript_140079;Transcript_162434
GO:0009637	P:response_to_blue_light	2	7.38729e-15	Transcript_029855;Transcript_232311
GO:0045489	P:pectin_biosynthetic_process	3	8.88693e-15	Transcript_010173;Transcript_020376;Transcript_152744
GO:0004177	F:aminopeptidase_activity	4	1.22825e-14	Transcript_010715;Transcript_020430;Transcript_026141;Transcript_207269
GO:0006334	P:nucleosome_assembly	2	1.58988e-14	Transcript_021918;Transcript_130786
GO:0016592	C:mediator_complex_	2	1.58988e-14	Transcript_119441;Transcript_161434
GO:0009736	P:cytokinin-activated_signaling_pathway	2	1.58988e-14	Transcript_002570;Transcript_003163
GO:0006366	P:transcription_from_RNA_polymerase_II_promoter	2	1.58988e-14	Transcript_214542;Transcript_244520
GO:0031418	F:L-ascorbic_acid_binding_	2	1.58988e-14	Transcript_024307;Transcript_200015
GO:0045330	F:aspartyl_esterase_activity	3	1.71348e-14	Transcript_044266;Transcript_227236;Transcript_235233
GO:0000049	F:tRNA_binding	3	1.71348e-14	Transcript_013972;Transcript_025631;Transcript_084126
ko03030	DNA_replication	5	2.27754e-14	Transcript_017392;Transcript_028266;Transcript_054998;Transcript_153778;Transcript_242859
GO:0003993	F:acid_phosphatase_activity	2	2.33831e-14	Transcript_015717;Transcript_154296
GO:0048038	F:quinone_binding	2	2.33831e-14	Transcript_016808;Transcript_157574
ko05215	Prostate_cancer	2	2.33831e-14	Transcript_156614;Transcript_207565
GO:0000325	C:plant-type_vacuole	2	3.44464e-14	Transcript_105109;Transcript_114412
GO:0009816	P:defense_response_to_bacterium,_incompatible_interaction	3	5.22118e-14	Transcript_021463;Transcript_050482;Transcript_202003
GO:0009553	P:embryo_sac_development	3	7.59714e-14	Transcript_043034;Transcript_163580;Transcript_165017
GO:0048573	P:photoperiodism,_flowering	5	1.31991e-13	Transcript_007373;Transcript_021802;Transcript_041388;Transcript_093975;Transcript_229195
GO:0004129	F:cytochrome-c_oxidase_activity	2	1.40122e-13	Transcript_017791;Transcript_090790
ko00460	Cyanoamino_acid_metabolism	2	1.40122e-13	Transcript_170776;Transcript_240627
GO:0000413	P:protein_peptidyl-prolyl_isomerization	4	2.17145e-13	Transcript_000349;Transcript_002570;Transcript_005547;Transcript_034648
GO:0006635	P:fatty_acid_beta-oxidation	3	2.36519e-13	Transcript_147537;Transcript_203920;Transcript_241534
GO:0015935	C:small_ribosomal_subunit	2	2.98668e-13	Transcript_029064;Transcript_121302
ko03440	Homologous_recombination	2	4.37143e-13	Transcript_017392;Transcript_204936
ko04260	Cardiac_muscle_contraction	2	4.37143e-13	Transcript_017791;Transcript_158543
GO:0090502	P:RNA_phosphodiester_bond_hydrolysis,_endonucleolytic	2	4.37143e-13	Transcript_025338;Transcript_202003
GO:0019901	F:protein_kinase_binding	2	6.40868e-13	Transcript_009916;Transcript_232902
GO:0009707	C:chloroplast_outer_membrane_	3	6.5338e-13	Transcript_000812;Transcript_026130;Transcript_026510
GO:0009636	P:response_to_toxic_substance	4	8.8311e-13	Transcript_003866;Transcript_028226;Transcript_033768;Transcript_188426
GO:0008654	P:phospholipid_biosynthetic_process	2	9.41031e-13	Transcript_001446;Transcript_080859
GO:0009073	P:aromatic_amino_acid_family_biosynthetic_process	2	1.2515e-12	Transcript_017184;Transcript_178011
GO:0009615	P:response_to_virus	2	1.8107e-12	Transcript_199136;Transcript_225598
GO:0003333	P:amino_acid_transmembrane_transport	4	1.81438e-12	Transcript_022464;Transcript_030947;Transcript_161599;Transcript_164909
GO:0010468	P:regulation_of_gene_expression	3	1.98799e-12	Transcript_133653;Transcript_152640;Transcript_200447
GO:0004364	F:glutathione_transferase_activity	3	1.98799e-12	Transcript_008959;Transcript_033768;Transcript_188426
ko00195	Photosynthesis	3	1.98799e-12	Transcript_008682;Transcript_036840;Transcript_195280
GO:0006108	P:malate_metabolic_process	2	2.6242e-12	Transcript_186303;Transcript_229288
ko01040	Biosynthesis_of_unsaturated_fatty_acids	2	3.80959e-12	Transcript_012173;Transcript_152573
GO:0010584	P:pollen_exine_formation	2	3.80959e-12	Transcript_078594;Transcript_181667
GO:0003824	F:catalytic_activity_	2	3.80959e-12	Transcript_003949;Transcript_235765
GO:0005665	C:DNA-directed_RNA_polymerase_II,_core_complex_	2	8.06896e-12	Transcript_190451;Transcript_214542
GO:0000724	P:double-strand_break_repair_via_homologous_recombination	2	8.06896e-12	Transcript_163580;Transcript_204936
GO:0042277	F:peptide_binding	2	1.72022e-11	Transcript_000349;Transcript_026141
GO:0046982	F:protein_heterodimerization_activity	4	2.1573e-11	Transcript_009806;Transcript_031951;Transcript_200447;Transcript_244520
ko03430	Mismatch_repair	2	2.33177e-11	Transcript_017392;Transcript_153778
ko03410	Base_excision_repair	3	2.421e-11	Transcript_054998;Transcript_153778;Transcript_242859
GO:0045944	P:positive_regulation_of_transcription_from_RNA_polymerase_II_promoter	3	2.421e-11	Transcript_199136;Transcript_234047;Transcript_244520
GO:0010311	P:lateral_root_formation	2	2.5176e-11	Transcript_013972;Transcript_193266
GO:0051865	P:protein_autoubiquitination	2	2.5176e-11	Transcript_030483;Transcript_171852
ko04270	Vascular_smooth_muscle_contraction	2	3.35785e-11	Transcript_013751;Transcript_169578
ko00980	Metabolism_of_xenobiotics_by_cytochrome_P450	2	3.35785e-11	Transcript_008959;Transcript_033768
GO:0010091	P:trichome_branching	3	3.4997e-11	Transcript_018886;Transcript_155116;Transcript_232803
GO:0009765	P:photosynthesis,_light_harvesting	2	4.84337e-11	Transcript_023063;Transcript_035649
GO:0042393	F:histone_binding	2	4.84337e-11	Transcript_043798;Transcript_242479
ko00650	Butanoate_metabolism	3	7.34997e-11	Transcript_043932;Transcript_154295;Transcript_241534
ko00982	Drug_metabolism_-_cytochrome_P450	2	1.01266e-10	Transcript_008959;Transcript_033768
GO:0016117	P:carotenoid_biosynthetic_process	2	1.01266e-10	Transcript_193996;Transcript_194031
GO:0022900	P:electron_transport_chain	2	1.01266e-10	Transcript_002006;Transcript_017791
GO:0007034	P:vacuolar_transport	2	1.46788e-10	Transcript_024907;Transcript_198729
GO:0009504	C:cell_plate_	2	2.13117e-10	Transcript_019030;Transcript_175654
GO:0042026	P:protein_refolding	2	2.13117e-10	Transcript_094276;Transcript_208330
GO:0007033	P:vacuole_organization	2	2.13117e-10	Transcript_018886;Transcript_165017
GO:0042302	F:structural_constituent_of_cuticle	3	2.91325e-10	Transcript_077349;Transcript_096153;Transcript_236228
GO:0051087	F:chaperone_binding	2	3.09908e-10	Transcript_007908;Transcript_094276
ko05204	Chemical_carcinogenesis	2	4.51358e-10	Transcript_008959;Transcript_033768
ko00670	One_carbon_pool_by_folate	2	4.51358e-10	Transcript_201923;Transcript_240627
GO:0031977	C:thylakoid_lumen	6	6.10704e-10	Transcript_008682;Transcript_034648;Transcript_036840;Transcript_156028;Transcript_222876;Transcript_224719
GO:0016324	C:apical_plasma_membrane	2	6.12071e-10	Transcript_123901;Transcript_232902
GO:0008601	F:protein_phosphatase_type_2A_regulator_activity	2	6.58356e-10	Transcript_005547;Transcript_241737
GO:0008762	F:UDP-N-acetylmuramate_dehydrogenase_activity	3	8.68927e-10	Transcript_006455;Transcript_091504;Transcript_136647
GO:0019253	P:reductive_pentose-phosphate_cycle	3	8.68927e-10	Transcript_017984;Transcript_156286;Transcript_235792
GO:0003779	F:actin_binding_	2	8.78693e-10	Transcript_136647;Transcript_159115
GO:0007346	P:regulation_of_mitotic_cell_cycle	2	1.26348e-09	Transcript_097307;Transcript_123901
GO:0009423	P:chorismate_biosynthetic_process	2	1.26348e-09	Transcript_017184;Transcript_178011
ko04112	Cell_cycle_-_Caulobacter	2	1.26348e-09	Transcript_220081;Transcript_232311
GO:0006879	P:cellular_iron_ion_homeostasis	2	1.81968e-09	Transcript_009948;Transcript_151033
GO:0042981	P:regulation_of_apoptotic_process	4	2.14041e-09	Transcript_070575;Transcript_123901;Transcript_194105;Transcript_234047
GO:0007030	P:Golgi_organization	3	2.42084e-09	Transcript_013087;Transcript_035136;Transcript_169084
GO:0048511	P:rhythmic_process	2	2.62494e-09	Transcript_027305;Transcript_029855
GO:0000272	P:polysaccharide_catabolic_process	2	2.62494e-09	Transcript_155035;Transcript_240042
GO:0046835	P:carbohydrate_phosphorylation	2	2.62494e-09	Transcript_148938;Transcript_224881
GO:0008094	F:DNA-dependent_ATPase_activity	2	3.79257e-09	Transcript_199136;Transcript_204936
GO:0016298	F:lipase_activity	2	3.79257e-09	Transcript_190250;Transcript_229288
GO:0009788	P:negative_regulation_of_abscisic_acid-activated_signaling_pathway	2	3.79257e-09	Transcript_032683;Transcript_191498
ko00590	Arachidonic_acid_metabolism	3	4.93267e-09	Transcript_003866;Transcript_013751;Transcript_026141
GO:0033612	F:receptor_serine/threonine_kinase_binding	3	4.93267e-09	Transcript_053308;Transcript_169084;Transcript_229020
GO:0009644	P:response_to_high_light_intensity	3	4.93267e-09	Transcript_028700;Transcript_158761;Transcript_163031
GO:0016459	C:myosin_complex_	2	5.48818e-09	Transcript_026702;Transcript_088341
ko04712	Circadian_rhythm_-_plant	2	5.48818e-09	Transcript_041388;Transcript_169291
GO:0019706	F:protein-cysteine_S-palmitoyltransferase_activity	3	7.05865e-09	Transcript_194231;Transcript_201791;Transcript_204554
GO:0043687	P:post-translational_protein_modification	3	7.05865e-09	Transcript_034685;Transcript_093975;Transcript_228577
GO:0010119	P:regulation_of_stomatal_movement	2	7.95403e-09	Transcript_041388;Transcript_203858
GO:0010494	C:cytoplasmic_stress_granule	2	1.1545e-08	Transcript_035672;Transcript_240948
GO:0008121	F:ubiquinol-cytochrome-c_reductase_activity	2	1.1545e-08	Transcript_102552;Transcript_244637
GO:0019899	F:enzyme_binding	3	1.45248e-08	Transcript_013087;Transcript_029593;Transcript_232902
GO:0061077	P:chaperone-mediated_protein_folding	2	1.56149e-08	Transcript_002570;Transcript_188020
GO:0016049	P:cell_growth	4	1.66036e-08	Transcript_016723;Transcript_027334;Transcript_155519;Transcript_244520
GO:0010118	P:stomatal_movement	2	1.67811e-08	Transcript_016956;Transcript_114412
GO:0008219	P:cell_death	2	2.23459e-08	Transcript_085531;Transcript_188020
GO:0031901	C:early_endosome_membrane	2	2.23459e-08	Transcript_035136;Transcript_201791
GO:0008143	F:poly(A)_binding	2	3.20283e-08	Transcript_035672;Transcript_243637
GO:0008285	P:negative_regulation_of_cell_proliferation	3	4.33674e-08	Transcript_053224;Transcript_095418;Transcript_124077
GO:0048477	P:oogenesis	3	4.33674e-08	Transcript_029064;Transcript_069308;Transcript_131197
GO:0031146	P:SCF-dependent_proteasomal_ubiquitin-dependent_protein_catabolic_process	2	4.59779e-08	Transcript_057485;Transcript_065703
GO:0009294	P:DNA_mediated_transformation	2	4.59779e-08	Transcript_006356;Transcript_118655
GO:0009514	C:glyoxysome	3	5.70079e-08	Transcript_149630;Transcript_157041;Transcript_203920
GO:0050897	F:cobalt_ion_binding	4	6.36634e-08	Transcript_165898;Transcript_186303;Transcript_208325;Transcript_220081
GO:0030054	C:cell_junction_	3	8.10946e-08	Transcript_007798;Transcript_014711;Transcript_031951
GO:0010305	P:leaf_vascular_tissue_pattern_formation	3	1.15542e-07	Transcript_026446;Transcript_146007;Transcript_172381
GO:0050821	P:protein_stabilization	2	1.37277e-07	Transcript_009846;Transcript_232902
GO:0008408	F:3'-5'_exonuclease_activity	2	1.37277e-07	Transcript_190556;Transcript_241666
GO:0010229	P:inflorescence_development	2	1.98259e-07	Transcript_152823;Transcript_195503
GO:0004518	F:nuclease_activity	2	1.98259e-07	Transcript_060566;Transcript_235627
GO:0010628	P:positive_regulation_of_gene_expression	2	1.98259e-07	Transcript_003866;Transcript_232902
GO:0015450	F:P-P-bond-hydrolysis-driven_protein_transmembrane_transporter_activity	2	2.8673e-07	Transcript_026510;Transcript_239938
GO:0016791	F:phosphatase_activity	2	2.8673e-07	Transcript_003866;Transcript_005103
GO:0004535	F:poly(A)-specific_ribonuclease_activity	2	2.8673e-07	Transcript_197101;Transcript_241513
GO:0005315	F:inorganic_phosphate_transmembrane_transporter_activity	2	2.8673e-07	Transcript_165017;Transcript_167855
GO:0004806	F:triglyceride_lipase_activity_	2	3.85254e-07	Transcript_190250;Transcript_229288
GO:0018279	P:protein_N-linked_glycosylation_via_asparagine	2	3.85254e-07	Transcript_034685;Transcript_228577
GO:0005685	C:U1_snRNP	2	3.85254e-07	Transcript_020644;Transcript_131087
GO:0006487	P:protein_N-linked_glycosylation	2	4.15232e-07	Transcript_034685;Transcript_097235
GO:0003725	F:double-stranded_RNA_binding	2	5.49492e-07	Transcript_079032;Transcript_199136
GO:0009654	C:photosystem_II_oxygen_evolving_complex	3	6.42901e-07	Transcript_036840;Transcript_100826;Transcript_156028
GO:0007338	P:single_fertilization	2	7.84933e-07	Transcript_067394;Transcript_149202
GO:0006122	P:mitochondrial_electron_transport,_ubiquinol_to_cytochrome_c	3	9.09023e-07	Transcript_102552;Transcript_158543;Transcript_244637
GO:0009060	P:aerobic_respiration	2	1.12294e-06	Transcript_042431;Transcript_090790
GO:0071011	C:precatalytic_spliceosome	3	1.28727e-06	Transcript_069308;Transcript_131197;Transcript_181887
GO:0030126	C:COPI_vesicle_coat	2	1.60887e-06	Transcript_041952;Transcript_047542
GO:0034613	P:cellular_protein_localization	2	2.30838e-06	Transcript_013021;Transcript_232902
GO:0004565	F:beta-galactosidase_activity	2	2.30838e-06	Transcript_013109;Transcript_205169
GO:0007517	P:muscle_organ_development	2	4.77142e-06	Transcript_159115;Transcript_244520
GO:0010227	P:floral_organ_abscission	2	4.77142e-06	Transcript_140349;Transcript_169084
GO:0007010	P:cytoskeleton_organization	2	6.43172e-06	Transcript_029593;Transcript_123901
GO:0030552	F:cAMP_binding	2	6.43172e-06	Transcript_022515;Transcript_192811
GO:0000381	P:regulation_of_alternative_mRNA_splicing,_via_spliceosome	2	6.87286e-06	Transcript_131197;Transcript_181887
GO:0000228	C:nuclear_chromosome	2	6.87286e-06	Transcript_029064;Transcript_036865
GO:0030968	P:endoplasmic_reticulum_unfolded_protein_response	3	7.02754e-06	Transcript_026328;Transcript_034685;Transcript_202003
GO:0009790	P:embryo_development	2	9.12711e-06	Transcript_165017;Transcript_225813
GO:0008559	F:xenobiotic-transporting_ATPase_activity	2	9.12711e-06	Transcript_019570;Transcript_114412
GO:0040007	P:growth	2	1.29708e-05	Transcript_002006;Transcript_198729
GO:0006261	P:DNA-dependent_DNA_replication	3	1.3894e-05	Transcript_054998;Transcript_155116;Transcript_242859
GO:0010152	P:pollen_maturation	2	1.84593e-05	Transcript_165017;Transcript_169084
GO:0016573	P:histone_acetylation	2	1.84593e-05	Transcript_095035;Transcript_118655
GO:0009817	P:defense_response_to_fungus,_incompatible_interaction	2	1.84593e-05	Transcript_027334;Transcript_050482
GO:0072593	P:reactive_oxygen_species_metabolic_process	2	1.84593e-05	Transcript_003866;Transcript_043387
ko00591	Linoleic_acid_metabolism	2	2.63062e-05	Transcript_013751;Transcript_035505
GO:0051568	P:histone_H3-K4_methylation	2	2.63062e-05	Transcript_043798;Transcript_173944
GO:0004521	F:endoribonuclease_activity	2	2.63062e-05	Transcript_085550;Transcript_202003
GO:0010102	P:lateral_root_morphogenesis_	5	3.26363e-05	Transcript_007373;Transcript_095418;Transcript_123186;Transcript_133653;Transcript_152640
GO:0051117	F:ATPase_binding	2	3.7538e-05	Transcript_029593;Transcript_232902
ko00072	Synthesis_and_degradation_of_ketone_bodies	2	3.7538e-05	Transcript_043932;Transcript_154295
GO:0007062	P:sister_chromatid_cohesion	2	3.7538e-05	Transcript_159115;Transcript_163580
GO:0048653	P:anther_development	2	5.36312e-05	Transcript_157821;Transcript_163580
GO:0030553	F:cGMP_binding	3	5.51816e-05	Transcript_022515;Transcript_169578;Transcript_192811
GO:0015171	F:amino_acid_transmembrane_transporter_activity	5	6.19779e-05	Transcript_022464;Transcript_030947;Transcript_161599;Transcript_164909;Transcript_192923
GO:0009960	P:endosperm_development	2	7.67105e-05	Transcript_222074;Transcript_234064
GO:0051131	P:chaperone-mediated_protein_complex_assembly	3	7.81161e-05	Transcript_129194;Transcript_159638;Transcript_207565
GO:0010089	P:xylem_development	3	7.81161e-05	Transcript_044618;Transcript_123900;Transcript_229020
GO:0016866	F:intramolecular_transferase_activity	3	0.000103004	Transcript_030020;Transcript_090131;Transcript_231441
GO:0006464	P:cellular_protein_modification_process	2	0.000109833	Transcript_013810;Transcript_025019
ko00906	Carotenoid_biosynthesis	2	0.00014535	Transcript_193996;Transcript_194031
GO:0006954	P:inflammatory_response	2	0.00014535	Transcript_003866;Transcript_026141
GO:0010207	P:photosystem_II_assembly	2	0.00014535	Transcript_008682;Transcript_034648
GO:0006605	P:protein_targeting	2	0.00014535	Transcript_214753;Transcript_239938
GO:0010051	P:xylem_and_phloem_pattern_formation	2	0.00014535	Transcript_026446;Transcript_123900
GO:0005771	C:multivesicular_body	2	0.00014535	Transcript_018886;Transcript_024907
GO:0009116	P:nucleoside_metabolic_process	2	0.000205387	Transcript_026157;Transcript_235765
GO:0009690	P:cytokinin_metabolic_process	2	0.000205387	Transcript_091504;Transcript_191732
GO:0006874	P:cellular_calcium_ion_homeostasis	2	0.000290582	Transcript_003866;Transcript_232902
GO:0005686	C:U2_snRNP	2	0.000290582	Transcript_181887;Transcript_236828
GO:0042632	P:cholesterol_homeostasis	2	0.000411585	Transcript_003866;Transcript_244520
GO:0048229	P:gametophyte_development	3	0.000554575	Transcript_053308;Transcript_112590;Transcript_169676
GO:0010215	P:cellulose_microfibril_organization	3	0.000554575	Transcript_016723;Transcript_139274;Transcript_155519
GO:0071004	C:U2-type_prespliceosome	2	0.000583571	Transcript_131087;Transcript_236828
GO:0003950	F:NAD+_ADP-ribosyltransferase_activity	2	0.000583571	Transcript_007373;Transcript_209451
GO:0019430	P:removal_of_superoxide_radicals	2	0.000583571	Transcript_043387;Transcript_238909
GO:0030018	C:Z_disc	4	0.00064376	Transcript_029593;Transcript_046002;Transcript_159115;Transcript_232902
GO:0006207	P:'de_novo'_pyrimidine_nucleobase_biosynthetic_process	2	0.000828146	Transcript_014023;Transcript_031089
GO:0043966	P:histone_H3_acetylation	2	0.000828146	Transcript_095035;Transcript_173944
GO:0071806	P:protein_transmembrane_transport	2	0.00111369	Transcript_129194;Transcript_159638
GO:0016323	C:basolateral_plasma_membrane	2	0.00111369	Transcript_029593;Transcript_232902
GO:0009942	P:longitudinal_axis_specification	2	0.00111369	Transcript_026446;Transcript_157821
GO:0006471	P:protein_ADP-ribosylation	2	0.00111369	Transcript_043054;Transcript_103018
GO:0040011	P:locomotion	2	0.00111369	Transcript_087121;Transcript_159115
GO:0007411	P:axon_guidance	2	0.00117603	Transcript_029593;Transcript_232902
GO:0007399	P:nervous_system_development	2	0.00155945	Transcript_033387;Transcript_171519
GO:0010189	P:vitamin_E_biosynthetic_process	2	0.00155945	Transcript_148379;Transcript_152745
ko00531	Glycosaminoglycan_degradation	2	0.00155945	Transcript_033387;Transcript_186964
GO:0009567	P:double_fertilization_forming_a_zygote_and_endosperm	2	0.00155945	Transcript_067394;Transcript_149202
GO:0008568	F:microtubule-severing_ATPase_activity	3	0.0019588	Transcript_007798;Transcript_014711;Transcript_238473
ko04975	Fat_digestion_and_absorption	3	0.0019588	Transcript_013751;Transcript_190250;Transcript_229288
GO:0007498	P:mesoderm_development	2	0.00218592	Transcript_046002;Transcript_159115
GO:0008320	F:protein_transmembrane_transporter_activity	2	0.00306682	Transcript_129194;Transcript_159638
GO:0031122	P:cytoplasmic_microtubule_organization	3	0.00377334	Transcript_007798;Transcript_014711;Transcript_238473
ko00908	Zeatin_biosynthesis	2	0.0043058	Transcript_091504;Transcript_216128
GO:0000038	P:very_long-chain_fatty_acid_metabolic_process	2	0.0043058	Transcript_150337;Transcript_234615
GO:0034551	P:mitochondrial_respiratory_chain_complex_III_assembly	2	0.0043058	Transcript_129194;Transcript_159638
GO:0006241	P:CTP_biosynthetic_process	3	0.00499225	Transcript_018441;Transcript_070575;Transcript_234047
GO:0006163	P:purine_nucleotide_metabolic_process	3	0.0052377	Transcript_070575;Transcript_204142;Transcript_234047
GO:0000244	P:spliceosomal_tri-snRNP_complex_assembly	2	0.00604823	Transcript_032544;Transcript_205045
GO:0005452	F:inorganic_anion_exchanger_activity	2	0.00604823	Transcript_206885;Transcript_228063
GO:0002098	P:tRNA_wobble_uridine_modification	2	0.00849738	Transcript_013972;Transcript_025631
GO:0004550	F:nucleoside_diphosphate_kinase_activity	3	0.00937514	Transcript_018441;Transcript_070575;Transcript_234047
GO:0034047	P:regulation_of_protein_phosphatase_type_2A_activity	2	0.0113186	Transcript_005547;Transcript_241737
GO:0030619	F:U1_snRNA_binding	2	0.0113186	Transcript_032544;Transcript_131087
GO:0004301	F:epoxide_hydrolase_activity	2	0.0113186	Transcript_003866;Transcript_026141
GO:0072661	P:protein_targeting_to_plasma_membrane	2	0.0113186	Transcript_029593;Transcript_232902
GO:0009800	P:cinnamic_acid_biosynthetic_process	2	0.0119362	Transcript_083009;Transcript_085954
GO:0050734	F:hydroxycinnamoyltransferase_activity_	2	0.0119362	Transcript_078594;Transcript_181667
ko00514	Other_types_of_O-glycan_biosynthesis	2	0.0156937	Transcript_024307;Transcript_216339
GO:0044210	P:'de_novo'_CTP_biosynthetic_process	2	0.0156937	Transcript_016858;Transcript_213733
GO:0051453	P:regulation_of_intracellular_pH	2	0.0156937	Transcript_206885;Transcript_228063
GO:0051205	P:protein_insertion_into_membrane	2	0.0156937	Transcript_044457;Transcript_198875
GO:0045211	C:postsynaptic_membrane	4	0.01795	Transcript_007798;Transcript_014711;Transcript_029593;Transcript_232902
GO:0019369	P:arachidonic_acid_metabolic_process	2	0.0217664	Transcript_003866;Transcript_026141
GO:0001047	F:core_promoter_binding	2	0.0217664	Transcript_199136;Transcript_244520
GO:0016779	F:nucleotidyltransferase_activity_	2	0.0217664	Transcript_013972;Transcript_025631
GO:0006228	P:UTP_biosynthetic_process	3	0.0241027	Transcript_018441;Transcript_070575;Transcript_234047
GO:0006183	P:GTP_biosynthetic_process	3	0.0241027	Transcript_018441;Transcript_070575;Transcript_234047
GO:0045037	P:protein_import_into_chloroplast_stroma	2	0.0301859	Transcript_000812;Transcript_236960
GO:0046488	P:phosphatidylinositol_metabolic_process	2	0.0301859	Transcript_001446;Transcript_080859
GO:0000123	C:histone_acetyltransferase_complex	2	0.0301859	Transcript_095035;Transcript_173944
GO:0007586	P:digestion	2	0.0301859	Transcript_155035;Transcript_229288
GO:0032549	F:ribonucleoside_binding	2	0.0301859	Transcript_190451;Transcript_214542
GO:0007286	P:spermatid_development	2	0.0418372	Transcript_002006;Transcript_016456
GO:0006048	P:UDP-N-acetylglucosamine_biosynthetic_process	2	0.0418372	Transcript_034685;Transcript_186471
GO:0006571	P:tyrosine_biosynthetic_process	2	0.0418372	Transcript_006354;Transcript_014426
GO:0080072	F:spermidine:sinapoyl_CoA_N-acyltransferase_activity	2	0.0418372	Transcript_078594;Transcript_181667
GO:0015140	F:malate_transmembrane_transporter_activity	2	0.0579137	Transcript_121498;Transcript_196785
GO:0080111	P:DNA_demethylation	2	0.0579137	Transcript_153778;Transcript_168654
GO:0071423	P:malate_transmembrane_transport	2	0.0579137	Transcript_121498;Transcript_196785
ko04122	Sulfur_relay_system	2	0.0579137	Transcript_013972;Transcript_025631
GO:0016410	F:N-acyltransferase_activity	2	0.0579137	Transcript_078594;Transcript_181667
GO:0009877	P:nodulation	2	0.0579137	Transcript_001570;Transcript_013064
GO:0080075	F:spermidine:feruloyl_CoA_N-acyltransferase_activity	2	0.0764511	Transcript_078594;Transcript_181667
GO:0019829	F:cation-transporting_ATPase_activity	2	0.0764511	Transcript_201827;Transcript_203858
GO:0080088	P:spermidine_hydroxycinnamate_conjugate_biosynthetic_process	2	0.0764511	Transcript_078594;Transcript_181667
GO:0080074	F:spermidine:caffeoyl_CoA_N-acyltransferase_activity	2	0.0764511	Transcript_078594;Transcript_181667
GO:0035445	P:borate_transmembrane_transport	2	0.0764511	Transcript_206885;Transcript_228063
GO:0080073	F:spermidine:coumaroyl_CoA_N-acyltransferase_activity	2	0.0800039	Transcript_078594;Transcript_181667
GO:0033523	P:histone_H2B_ubiquitination	2	0.0800039	Transcript_027334;Transcript_167609
GO:0042826	F:histone_deacetylase_binding	2	0.0800039	Transcript_016456;Transcript_199136
GO:0072659	P:protein_localization_to_plasma_membrane	2	0.0800039	Transcript_123901;Transcript_232902
GO:0009405	P:pathogenesis	2	0.0800039	Transcript_001446;Transcript_118655
GO:0000243	C:commitment_complex_	2	0.0800039	Transcript_126907;Transcript_131087
GO:0043171	P:peptide_catabolic_process	2	0.104405	Transcript_026141;Transcript_030311
ko00627	Aminobenzoate_degradation	2	0.104405	Transcript_015717;Transcript_241534
GO:0035097	C:histone_methyltransferase_complex_	2	0.142332	Transcript_043798;Transcript_173944
GO:0033862	F:UMP_kinase_activity	2	0.19347	Transcript_016858;Transcript_213733
GO:0004576	F:oligosaccharyl_transferase_activity	2	0.19347	Transcript_004775;Transcript_237255
GO:0043434	P:response_to_peptide_hormone	2	0.19347	Transcript_026141;Transcript_190250
GO:0018344	P:protein_geranylgeranylation	2	0.255255	Transcript_032683;Transcript_242727
GO:0033730	F:arogenate_dehydrogenase_(NADP+)_activity	2	0.2618	Transcript_006354;Transcript_014426
GO:0008977	F:prephenate_dehydrogenase_activity	2	0.2618	Transcript_006354;Transcript_014426
GO:0071339	C:MLL1_complex	2	0.2618	Transcript_173944;Transcript_205045
GO:0004665	F:prephenate_dehydrogenase_(NADP+)_activity	2	0.2618	Transcript_006354;Transcript_014426
GO:0008622	C:epsilon_DNA_polymerase_complex_	2	0.341538	Transcript_054998;Transcript_242859
GO:0080139	F:borate_efflux_transmembrane_transporter_activity	2	0.341538	Transcript_206885;Transcript_228063
GO:0042276	P:error-prone_translesion_synthesis	2	0.341538	Transcript_054998;Transcript_242859
GO:0031430	C:M_band	3	0.391535	Transcript_029593;Transcript_046002;Transcript_232902
GO:0008081	F:phosphoric_diester_hydrolase_activity	2	0.454637	Transcript_150312;Transcript_162265
GO:0006220	P:pyrimidine_nucleotide_metabolic_process	2	0.600207	Transcript_070575;Transcript_234047
GO:0001934	P:positive_regulation_of_protein_phosphorylation	2	0.600207	Transcript_123901;Transcript_244520
GO:0034227	P:tRNA_thio-modification	2	0.600207	Transcript_013972;Transcript_025631
GO:0032447	P:protein_urmylation	2	0.600207	Transcript_013972;Transcript_025631
GO:0009558	P:embryo_sac_cellularization	3	0.638903	Transcript_112590;Transcript_169676;Transcript_234064
GO:0042383	C:sarcolemma	2	0.692012	Transcript_029593;Transcript_232902
GO:0030507	F:spectrin_binding	2	0.776109	Transcript_029593;Transcript_232902
GO:0009142	P:nucleoside_triphosphate_biosynthetic_process	2	0.782301	Transcript_070575;Transcript_234047
GO:0008974	F:phosphoribulokinase_activity	2	0.782301	Transcript_017984;Transcript_156286
GO:0004662	F:CAAX-protein_geranylgeranyltransferase_activity	2	1	Transcript_032683;Transcript_242727
GO:0005886	C:plasma_membrane	86		Transcript_003957;Transcript_004775;Transcript_005249;Transcript_006455;Transcript_006961;Transcript_006967;Transcript_009916;Transcript_013021;Transcript_014885;Transcript_015547;Transcript_015691;Transcript_016956;Transcript_017628;Transcript_017773;Transcript_018878;Transcript_019354;Transcript_022464;Transcript_022515;Transcript_029410;Transcript_029593;Transcript_029884;Transcript_030311;Tra…
GO:0005634	C:nucleus	171		Transcript_000349;Transcript_002570;Transcript_003163;Transcript_005103;Transcript_005379;Transcript_005547;Transcript_005619;Transcript_006356;Transcript_006967;Transcript_007908;Transcript_009806;Transcript_009846;Transcript_010715;Transcript_012381;Transcript_012970;Transcript_013021;Transcript_013641;Transcript_014648;Transcript_014919;Transcript_015426;Transcript_015868;Transcript_016282;Tra…
GO:0005524	F:ATP_binding	115		Transcript_002006;Transcript_003957;Transcript_005547;Transcript_006961;Transcript_007313;Transcript_007798;Transcript_007889;Transcript_008818;Transcript_009916;Transcript_010386;Transcript_013064;Transcript_013189;Transcript_014569;Transcript_014711;Transcript_015364;Transcript_015691;Transcript_016726;Transcript_016858;Transcript_017154;Transcript_017434;Transcript_017628;Transcript_017984;Tra…
GO:0046872	F:metal_ion_binding_	81		Transcript_005103;Transcript_006826;Transcript_007313;Transcript_009806;Transcript_011312;Transcript_012173;Transcript_015717;Transcript_016282;Transcript_016456;Transcript_016808;Transcript_017184;Transcript_019202;Transcript_021451;Transcript_021463;Transcript_023063;Transcript_025875;Transcript_026130;Transcript_026639;Transcript_027305;Transcript_028266;Transcript_029892;Transcript_032683;Tra…
GO:0016021	C:integral_component_of_membrane	135		Transcript_001570;Transcript_001902;Transcript_002570;Transcript_004775;Transcript_005103;Transcript_006381;Transcript_006961;Transcript_007889;Transcript_008603;Transcript_010173;Transcript_012012;Transcript_013021;Transcript_013064;Transcript_015691;Transcript_015841;Transcript_016956;Transcript_017448;Transcript_017628;Transcript_017773;Transcript_017791;Transcript_018089;Transcript_019354;Tra…
GO:0005737	C:cytoplasm	103		Transcript_000349;Transcript_002570;Transcript_003163;Transcript_003866;Transcript_003949;Transcript_005103;Transcript_005547;Transcript_006967;Transcript_007908;Transcript_009846;Transcript_010715;Transcript_012381;Transcript_013087;Transcript_013641;Transcript_013778;Transcript_013972;Transcript_015722;Transcript_015922;Transcript_016456;Transcript_016858;Transcript_018550;Transcript_018886;Tra…

## Sheet: GOCC
Category	Description	#Genes	pValue	Genes
GO:0005634	C:nucleus	171		Transcript_000349;Transcript_002570;Transcript_003163;Transcript_005103;Transcript_005379;Transcript_005547;Transcript_005619;Transcript_006356;Transcript_006967;Transcript_007908;Transcript_009806;Transcript_009846;Transcript_010715;Transcript_012381;Transcript_012970;Transcript_013021;Transcript_013641;Transcript_014648;Transcript_014919;Transcript_015426;Transcript_015868;Transcript_016282;Tra…
GO:0016021	C:integral_component_of_membrane	135		Transcript_001570;Transcript_001902;Transcript_002570;Transcript_004775;Transcript_005103;Transcript_006381;Transcript_006961;Transcript_007889;Transcript_008603;Transcript_010173;Transcript_012012;Transcript_013021;Transcript_013064;Transcript_015691;Transcript_015841;Transcript_016956;Transcript_017448;Transcript_017628;Transcript_017773;Transcript_017791;Transcript_018089;Transcript_019354;Tra…
GO:0005737	C:cytoplasm	103		Transcript_000349;Transcript_002570;Transcript_003163;Transcript_003866;Transcript_003949;Transcript_005103;Transcript_005547;Transcript_006967;Transcript_007908;Transcript_009846;Transcript_010715;Transcript_012381;Transcript_013087;Transcript_013641;Transcript_013778;Transcript_013972;Transcript_015722;Transcript_015922;Transcript_016456;Transcript_016858;Transcript_018550;Transcript_018886;Tra…
GO:0005886	C:plasma_membrane	86		Transcript_003957;Transcript_004775;Transcript_005249;Transcript_006455;Transcript_006961;Transcript_006967;Transcript_009916;Transcript_013021;Transcript_014885;Transcript_015547;Transcript_015691;Transcript_016956;Transcript_017628;Transcript_017773;Transcript_018878;Transcript_019354;Transcript_022464;Transcript_022515;Transcript_029410;Transcript_029593;Transcript_029884;Transcript_030311;Tra…
GO:0005829	C:cytosol	66	0	Transcript_002570;Transcript_003163;Transcript_003866;Transcript_003949;Transcript_006356;Transcript_006455;Transcript_010715;Transcript_015547;Transcript_017434;Transcript_025794;Transcript_026141;Transcript_027305;Transcript_028065;Transcript_028700;Transcript_029593;Transcript_030483;Transcript_031089;Transcript_032947;Transcript_033768;Transcript_034685;Transcript_035652;Transcript_036865;Tra…
GO:0009507	C:chloroplast	49	0	Transcript_001997;Transcript_005103;Transcript_006354;Transcript_012173;Transcript_013189;Transcript_013810;Transcript_014426;Transcript_017184;Transcript_017984;Transcript_020430;Transcript_021575;Transcript_028226;Transcript_029884;Transcript_031089;Transcript_034648;Transcript_036840;Transcript_056651;Transcript_077958;Transcript_090816;Transcript_096339;Transcript_099826;Transcript_148379;Tra…
GO:0005739	C:mitochondrion	41	0	Transcript_002006;Transcript_006455;Transcript_006521;Transcript_007313;Transcript_007889;Transcript_007908;Transcript_016991;Transcript_020323;Transcript_024979;Transcript_026157;Transcript_027334;Transcript_030311;Transcript_032253;Transcript_032946;Transcript_041694;Transcript_044457;Transcript_050374;Transcript_079032;Transcript_096339;Transcript_129194;Transcript_133640;Transcript_151033;Tra…
GO:0009506	C:plasmodesma	40	0	Transcript_000349;Transcript_003957;Transcript_005249;Transcript_006455;Transcript_006961;Transcript_012960;Transcript_015547;Transcript_015691;Transcript_016723;Transcript_017628;Transcript_018878;Transcript_018886;Transcript_029440;Transcript_030020;Transcript_031135;Transcript_034289;Transcript_043932;Transcript_044618;Transcript_050046;Transcript_053308;Transcript_087669;Transcript_090131;Tra…
GO:0016020	C:membrane	34	0	Transcript_004775;Transcript_007313;Transcript_008603;Transcript_010419;Transcript_010715;Transcript_013778;Transcript_019639;Transcript_024907;Transcript_026446;Transcript_030079;Transcript_032544;Transcript_042490;Transcript_044064;Transcript_050374;Transcript_079032;Transcript_083500;Transcript_084534;Transcript_119441;Transcript_130786;Transcript_169444;Transcript_175752;Transcript_192923;Tra…
GO:0005794	C:Golgi_apparatus	31	0	Transcript_008603;Transcript_010173;Transcript_013087;Transcript_013751;Transcript_016723;Transcript_017184;Transcript_017448;Transcript_019639;Transcript_020376;Transcript_024907;Transcript_030020;Transcript_035136;Transcript_043054;Transcript_067394;Transcript_090131;Transcript_097235;Transcript_098689;Transcript_103018;Transcript_114412;Transcript_130941;Transcript_146566;Transcript_150334;Tra…
GO:0005576	C:extracellular_region	23	5.28397e-297	Transcript_009042;Transcript_009948;Transcript_013751;Transcript_015717;Transcript_016788;Transcript_019393;Transcript_020891;Transcript_030020;Transcript_032093;Transcript_033032;Transcript_044266;Transcript_050046;Transcript_050448;Transcript_055095;Transcript_125911;Transcript_154296;Transcript_155035;Transcript_169444;Transcript_170093;Transcript_174303;Transcript_227236;Transcript_229288;Tra…
GO:0005789	C:endoplasmic_reticulum_membrane	22	3.58412e-289	Transcript_002570;Transcript_004775;Transcript_022911;Transcript_026328;Transcript_032311;Transcript_032732;Transcript_034277;Transcript_042490;Transcript_056993;Transcript_094276;Transcript_105809;Transcript_115223;Transcript_150337;Transcript_152573;Transcript_156117;Transcript_161710;Transcript_169084;Transcript_175752;Transcript_196075;Transcript_234615;Transcript_237255;Transcript_239938
GO:0000139	C:Golgi_membrane	20	1.82902e-217	Transcript_008603;Transcript_010173;Transcript_017448;Transcript_018089;Transcript_019639;Transcript_020376;Transcript_026695;Transcript_032732;Transcript_094276;Transcript_130941;Transcript_152744;Transcript_161710;Transcript_165441;Transcript_167855;Transcript_194671;Transcript_195880;Transcript_199976;Transcript_201791;Transcript_204554;Transcript_207563
GO:0005743	C:mitochondrial_inner_membrane	19	4.67115e-131	Transcript_002006;Transcript_011312;Transcript_017791;Transcript_018086;Transcript_027473;Transcript_042224;Transcript_044457;Transcript_090790;Transcript_096339;Transcript_102552;Transcript_110612;Transcript_129194;Transcript_150958;Transcript_151033;Transcript_151557;Transcript_159638;Transcript_227573;Transcript_227968;Transcript_244637
GO:0005783	C:endoplasmic_reticulum_	17	5.40186e-274	Transcript_002570;Transcript_004775;Transcript_026328;Transcript_042490;Transcript_044064;Transcript_067394;Transcript_150337;Transcript_175752;Transcript_190551;Transcript_196075;Transcript_198229;Transcript_202003;Transcript_222135;Transcript_228577;Transcript_234615;Transcript_237255;Transcript_244520
GO:0005730	C:nucleolus	17	1.52572e-207	Transcript_005103;Transcript_005619;Transcript_028268;Transcript_029064;Transcript_034522;Transcript_036865;Transcript_041930;Transcript_046126;Transcript_053224;Transcript_085531;Transcript_104878;Transcript_146566;Transcript_153778;Transcript_168654;Transcript_194105;Transcript_207565;Transcript_234481
GO:0009570	C:chloroplast_stroma	17	3.79009e-184	Transcript_005103;Transcript_010419;Transcript_013189;Transcript_014869;Transcript_017184;Transcript_028700;Transcript_036840;Transcript_090816;Transcript_148938;Transcript_157654;Transcript_178011;Transcript_187961;Transcript_188020;Transcript_198376;Transcript_213209;Transcript_230129;Transcript_232311
GO:0005654	C:nucleoplasm	17	4.57392e-118	Transcript_005547;Transcript_020644;Transcript_026141;Transcript_032544;Transcript_041952;Transcript_046126;Transcript_053224;Transcript_054998;Transcript_057485;Transcript_063944;Transcript_083500;Transcript_123901;Transcript_146566;Transcript_165408;Transcript_181887;Transcript_242447;Transcript_242479
GO:0005774	C:vacuolar_membrane	14	3.35105e-173	Transcript_016956;Transcript_019570;Transcript_019639;Transcript_029884;Transcript_034289;Transcript_079175;Transcript_114412;Transcript_121498;Transcript_157041;Transcript_161599;Transcript_201827;Transcript_207269;Transcript_222135;Transcript_234212
GO:0005773	C:vacuole	14	6.05263e-172	Transcript_006455;Transcript_013446;Transcript_013751;Transcript_015717;Transcript_016956;Transcript_018878;Transcript_029884;Transcript_114412;Transcript_154532;Transcript_161599;Transcript_169445;Transcript_186964;Transcript_198874;Transcript_207269
GO:0005840	C:ribosome_	14	1.57777e-160	Transcript_015422;Transcript_019621;Transcript_021575;Transcript_029064;Transcript_036865;Transcript_069732;Transcript_111339;Transcript_165440;Transcript_169483;Transcript_201479;Transcript_204080;Transcript_206649;Transcript_208291;Transcript_230129
GO:0005768	C:endosome_	14	1.70355e-123	Transcript_008603;Transcript_010173;Transcript_016723;Transcript_017184;Transcript_019639;Transcript_020376;Transcript_035136;Transcript_044618;Transcript_130941;Transcript_140349;Transcript_194671;Transcript_195880;Transcript_203858;Transcript_204554
GO:0070062	C:extracellular_exosome	14	2.73844e-117	Transcript_003866;Transcript_005547;Transcript_009846;Transcript_022374;Transcript_024307;Transcript_026141;Transcript_033387;Transcript_034685;Transcript_056993;Transcript_084534;Transcript_123901;Transcript_199136;Transcript_232172;Transcript_234047
GO:0009535	C:chloroplast_thylakoid_membrane	13	4.33697e-137	Transcript_023063;Transcript_035649;Transcript_036840;Transcript_056651;Transcript_099826;Transcript_100826;Transcript_153991;Transcript_156028;Transcript_188020;Transcript_195280;Transcript_198875;Transcript_220081;Transcript_232311
GO:0005802	C:trans-Golgi_network	13	1.61741e-102	Transcript_008603;Transcript_010173;Transcript_016723;Transcript_017184;Transcript_019639;Transcript_020376;Transcript_035136;Transcript_130941;Transcript_140349;Transcript_194671;Transcript_195880;Transcript_203858;Transcript_204554
GO:0005618	C:cell_wall_	12	2.24701e-185	Transcript_013109;Transcript_017904;Transcript_030020;Transcript_044266;Transcript_150334;Transcript_169444;Transcript_170093;Transcript_174303;Transcript_205169;Transcript_227236;Transcript_234481;Transcript_235233
GO:0005874	C:microtubule	9	4.81585e-82	Transcript_019030;Transcript_070575;Transcript_087121;Transcript_090178;Transcript_112590;Transcript_169676;Transcript_222074;Transcript_232311;Transcript_234481
GO:0009536	C:plastid	9	4.11847e-68	Transcript_013189;Transcript_020323;Transcript_026130;Transcript_096339;Transcript_148938;Transcript_165017;Transcript_188020;Transcript_200447;Transcript_216128
GO:0031225	C:anchored_component_of_membrane_	9	1.57868e-48	Transcript_005249;Transcript_006455;Transcript_016723;Transcript_139274;Transcript_149202;Transcript_152354;Transcript_155519;Transcript_195279;Transcript_197339
GO:0005856	C:cytoskeleton	9	5.95072e-47	Transcript_029593;Transcript_031951;Transcript_046081;Transcript_094276;Transcript_123901;Transcript_146566;Transcript_200946;Transcript_232902;Transcript_243744
GO:0009941	C:chloroplast_envelope	8	3.81483e-138	Transcript_028700;Transcript_090816;Transcript_099826;Transcript_153991;Transcript_188020;Transcript_194031;Transcript_230129;Transcript_236960
GO:0048046	C:apoplast_	8	1.2607e-112	Transcript_003949;Transcript_006455;Transcript_013109;Transcript_017904;Transcript_036840;Transcript_150334;Transcript_205169;Transcript_229020
GO:0005887	C:integral_component_of_plasma_membrane_	8	1.50757e-61	Transcript_018878;Transcript_161599;Transcript_169445;Transcript_192811;Transcript_192923;Transcript_206885;Transcript_228063;Transcript_232902
GO:0009524	C:phragmoplast	8	2.0453e-39	Transcript_019030;Transcript_043034;Transcript_090178;Transcript_112590;Transcript_146566;Transcript_169676;Transcript_175654;Transcript_234481
GO:0005777	C:peroxisome	7	1.83801e-68	Transcript_003866;Transcript_007798;Transcript_014711;Transcript_026046;Transcript_030311;Transcript_147537;Transcript_157041
GO:0005615	C:extracellular_space_	7	2.37838e-67	Transcript_043104;Transcript_091504;Transcript_105109;Transcript_150334;Transcript_155035;Transcript_190250;Transcript_229020
GO:0005681	C:spliceosomal_complex	7	1.77012e-52	Transcript_045261;Transcript_120759;Transcript_181887;Transcript_200172;Transcript_203844;Transcript_205045;Transcript_236828
GO:0009505	C:plant-type_cell_wall	7	5.77595e-52	Transcript_006455;Transcript_015691;Transcript_050046;Transcript_139274;Transcript_150334;Transcript_169444;Transcript_186964
GO:0009579	C:thylakoid	7	9.97168e-48	Transcript_005103;Transcript_034648;Transcript_036840;Transcript_153991;Transcript_156028;Transcript_157654;Transcript_224719
GO:0046658	C:anchored_component_of_plasma_membrane	7	3.08669e-35	Transcript_005249;Transcript_016723;Transcript_139274;Transcript_150312;Transcript_152354;Transcript_162265;Transcript_197339
GO:0070469	C:respiratory_chain	7	4.45707e-29	Transcript_017791;Transcript_027473;Transcript_090790;Transcript_102552;Transcript_165898;Transcript_227968;Transcript_244637
GO:0009706	C:chloroplast_inner_membrane	7	1.13644e-25	Transcript_014869;Transcript_089751;Transcript_099826;Transcript_152745;Transcript_188020;Transcript_196785;Transcript_236960
GO:0005622	C:intracellular_	6	3.35879e-71	Transcript_045046;Transcript_070575;Transcript_232902;Transcript_234047;Transcript_234101;Transcript_241513
GO:0009543	C:chloroplast_thylakoid_lumen_	6	2.31501e-15	Transcript_034648;Transcript_035637;Transcript_156028;Transcript_190598;Transcript_222876;Transcript_224719
GO:0031977	C:thylakoid_lumen	6	6.10704e-10	Transcript_008682;Transcript_034648;Transcript_036840;Transcript_156028;Transcript_222876;Transcript_224719
GO:0009534	C:chloroplast_thylakoid	5	6.93134e-50	Transcript_036840;Transcript_099826;Transcript_153991;Transcript_157654;Transcript_188020
GO:0010008	C:endosome_membrane_	5	3.82853e-45	Transcript_008603;Transcript_044618;Transcript_198729;Transcript_199976;Transcript_222135
GO:0016607	C:nuclear_speck	5	1.05402e-36	Transcript_020644;Transcript_032544;Transcript_169291;Transcript_203844;Transcript_205045
GO:0071013	C:catalytic_step_2_spliceosome_	5	1.06006e-16	Transcript_005619;Transcript_032544;Transcript_069308;Transcript_131197;Transcript_236828
GO:0019898	C:extrinsic_component_of_membrane	5	1.88683e-15	Transcript_036840;Transcript_045046;Transcript_100826;Transcript_148177;Transcript_156028
GO:0005759	C:mitochondrial_matrix_	4	7.88029e-52	Transcript_136647;Transcript_165898;Transcript_208325;Transcript_241534
GO:0022625	C:cytosolic_large_ribosomal_subunit	4	1.25227e-45	Transcript_029884;Transcript_030079;Transcript_034145;Transcript_034522
GO:0022627	C:cytosolic_small_ribosomal_subunit_	4	1.29335e-34	Transcript_028268;Transcript_036865;Transcript_041930;Transcript_180432
GO:0005635	C:nuclear_envelope	4	1.41322e-31	Transcript_043034;Transcript_087121;Transcript_155115;Transcript_214753
GO:0005875	C:microtubule_associated_complex	4	3.9491e-23	Transcript_002006;Transcript_069308;Transcript_070575;Transcript_159115
GO:0031966	C:mitochondrial_membrane	4	1.06495e-20	Transcript_032311;Transcript_188020;Transcript_196980;Transcript_227224
GO:0005747	C:mitochondrial_respiratory_chain_complex_I_	4	2.99536e-19	Transcript_016808;Transcript_022975;Transcript_167468;Transcript_196980
GO:0030018	C:Z_disc	4	0.00064376	Transcript_029593;Transcript_046002;Transcript_159115;Transcript_232902
GO:0045211	C:postsynaptic_membrane	4	0.01795	Transcript_007798;Transcript_014711;Transcript_029593;Transcript_232902
GO:0022626	C:cytosolic_ribosome	3	4.65599e-59	Transcript_025794;Transcript_034145;Transcript_207269
GO:0031969	C:chloroplast_membrane_	3	9.51192e-53	Transcript_165017;Transcript_183424;Transcript_194031
GO:0048471	C:perinuclear_region_of_cytoplasm	3	1.53618e-30	Transcript_044064;Transcript_161710;Transcript_232902
GO:0012505	C:endomembrane_system	3	3.66125e-29	Transcript_044618;Transcript_045046;Transcript_175654
GO:0005741	C:mitochondrial_outer_membrane_	3	8.79984e-20	Transcript_020323;Transcript_190900;Transcript_238473
GO:0005778	C:peroxisomal_membrane	3	4.84816e-17	Transcript_147537;Transcript_170776;Transcript_230648
GO:0009707	C:chloroplast_outer_membrane_	3	6.5338e-13	Transcript_000812;Transcript_026130;Transcript_026510
GO:0009514	C:glyoxysome	3	5.70079e-08	Transcript_149630;Transcript_157041;Transcript_203920
GO:0030054	C:cell_junction_	3	8.10946e-08	Transcript_007798;Transcript_014711;Transcript_031951
GO:0009654	C:photosystem_II_oxygen_evolving_complex	3	6.42901e-07	Transcript_036840;Transcript_100826;Transcript_156028
GO:0071011	C:precatalytic_spliceosome	3	1.28727e-06	Transcript_069308;Transcript_131197;Transcript_181887
GO:0031430	C:M_band	3	0.391535	Transcript_029593;Transcript_046002;Transcript_232902
GO:0009705	C:plant-type_vacuole_membrane	2	1.91568e-42	Transcript_020623;Transcript_230671
GO:0031902	C:late_endosome_membrane	2	1.54638e-27	Transcript_024907;Transcript_044618
GO:0005871	C:kinesin_complex	2	5.06259e-27	Transcript_112590;Transcript_169676
GO:0005764	C:lysosome	2	1.12859e-26	Transcript_033387;Transcript_105109
GO:0031965	C:nuclear_membrane_	2	3.36961e-26	Transcript_022464;Transcript_216128
GO:0031201	C:SNARE_complex	2	7.55577e-24	Transcript_016956;Transcript_175654
GO:0000932	C:cytoplasmic_mRNA_processing_body	2	5.14641e-22	Transcript_102209;Transcript_240948
GO:0005623	C:cell_	2	1.34347e-18	Transcript_009948;Transcript_146007
GO:0005643	C:nuclear_pore	2	4.21406e-18	Transcript_214753;Transcript_242447
GO:0009523	C:photosystem_II	2	3.91573e-17	Transcript_023063;Transcript_035649
GO:0080008	C:Cul4-RING_E3_ubiquitin_ligase_complex	2	8.32837e-17	Transcript_057485;Transcript_169291
GO:0005813	C:centrosome_	2	1.7843e-16	Transcript_060566;Transcript_222074
GO:0009522	C:photosystem_I	2	3.85035e-16	Transcript_023063;Transcript_035649
GO:0030176	C:integral_component_of_endoplasmic_reticulum_membrane	2	5.0486e-15	Transcript_190551;Transcript_244520
GO:0016592	C:mediator_complex_	2	1.58988e-14	Transcript_119441;Transcript_161434
GO:0000325	C:plant-type_vacuole	2	3.44464e-14	Transcript_105109;Transcript_114412
GO:0015935	C:small_ribosomal_subunit	2	2.98668e-13	Transcript_029064;Transcript_121302
GO:0005665	C:DNA-directed_RNA_polymerase_II,_core_complex_	2	8.06896e-12	Transcript_190451;Transcript_214542
GO:0009504	C:cell_plate_	2	2.13117e-10	Transcript_019030;Transcript_175654
GO:0016324	C:apical_plasma_membrane	2	6.12071e-10	Transcript_123901;Transcript_232902
GO:0016459	C:myosin_complex_	2	5.48818e-09	Transcript_026702;Transcript_088341
GO:0010494	C:cytoplasmic_stress_granule	2	1.1545e-08	Transcript_035672;Transcript_240948
GO:0031901	C:early_endosome_membrane	2	2.23459e-08	Transcript_035136;Transcript_201791
GO:0005685	C:U1_snRNP	2	3.85254e-07	Transcript_020644;Transcript_131087
GO:0030126	C:COPI_vesicle_coat	2	1.60887e-06	Transcript_041952;Transcript_047542
GO:0000228	C:nuclear_chromosome	2	6.87286e-06	Transcript_029064;Transcript_036865
GO:0005771	C:multivesicular_body	2	0.00014535	Transcript_018886;Transcript_024907
GO:0005686	C:U2_snRNP	2	0.000290582	Transcript_181887;Transcript_236828
GO:0071004	C:U2-type_prespliceosome	2	0.000583571	Transcript_131087;Transcript_236828
GO:0016323	C:basolateral_plasma_membrane	2	0.00111369	Transcript_029593;Transcript_232902
GO:0000123	C:histone_acetyltransferase_complex	2	0.0301859	Transcript_095035;Transcript_173944
GO:0000243	C:commitment_complex_	2	0.0800039	Transcript_126907;Transcript_131087
GO:0035097	C:histone_methyltransferase_complex_	2	0.142332	Transcript_043798;Transcript_173944
GO:0071339	C:MLL1_complex	2	0.2618	Transcript_173944;Transcript_205045
GO:0008622	C:epsilon_DNA_polymerase_complex_	2	0.341538	Transcript_054998;Transcript_242859
GO:0042383	C:sarcolemma	2	0.692012	Transcript_029593;Transcript_232902

## Sheet: GOMF
Category	Description	#Genes	pValue	Genes
GO:0005524	F:ATP_binding	115		Transcript_002006;Transcript_003957;Transcript_005547;Transcript_006961;Transcript_007313;Transcript_007798;Transcript_007889;Transcript_008818;Transcript_009916;Transcript_010386;Transcript_013064;Transcript_013189;Transcript_014569;Transcript_014711;Transcript_015364;Transcript_015691;Transcript_016726;Transcript_016858;Transcript_017154;Transcript_017434;Transcript_017628;Transcript_017984;Tra…
GO:0046872	F:metal_ion_binding_	81		Transcript_005103;Transcript_006826;Transcript_007313;Transcript_009806;Transcript_011312;Transcript_012173;Transcript_015717;Transcript_016282;Transcript_016456;Transcript_016808;Transcript_017184;Transcript_019202;Transcript_021451;Transcript_021463;Transcript_023063;Transcript_025875;Transcript_026130;Transcript_026639;Transcript_027305;Transcript_028266;Transcript_029892;Transcript_032683;Tra…
GO:0008270	F:zinc_ion_binding	48	0	Transcript_004984;Transcript_007889;Transcript_010419;Transcript_012970;Transcript_014569;Transcript_015868;Transcript_016835;Transcript_017547;Transcript_018642;Transcript_019168;Transcript_021826;Transcript_022995;Transcript_024907;Transcript_026141;Transcript_027334;Transcript_030311;Transcript_046001;Transcript_046126;Transcript_056680;Transcript_057485;Transcript_063344;Transcript_085550;Tra…
GO:0003677	F:DNA_binding	45	0	Transcript_009806;Transcript_014919;Transcript_015426;Transcript_019191;Transcript_020644;Transcript_021802;Transcript_027562;Transcript_028266;Transcript_029854;Transcript_032947;Transcript_046801;Transcript_050305;Transcript_054998;Transcript_085954;Transcript_095035;Transcript_099826;Transcript_113094;Transcript_114809;Transcript_123900;Transcript_136856;Transcript_152823;Transcript_153778;Tra…
GO:0003700	F:sequence-specific_DNA_binding_transcription_factor_activity	36	0	Transcript_005379;Transcript_006356;Transcript_009806;Transcript_014648;Transcript_015426;Transcript_016282;Transcript_019191;Transcript_021802;Transcript_026446;Transcript_027562;Transcript_029854;Transcript_029892;Transcript_032947;Transcript_041388;Transcript_046001;Transcript_046801;Transcript_050305;Transcript_059815;Transcript_084933;Transcript_085954;Transcript_113094;Transcript_114809;Tra…
GO:0004674	F:protein_serine/threonine_kinase_activity	29	0	Transcript_006961;Transcript_010386;Transcript_013064;Transcript_015691;Transcript_016726;Transcript_017154;Transcript_017434;Transcript_018119;Transcript_019354;Transcript_029440;Transcript_030477;Transcript_069724;Transcript_085549;Transcript_123901;Transcript_133653;Transcript_149488;Transcript_152640;Transcript_156614;Transcript_157821;Transcript_161985;Transcript_169578;Transcript_170699;Tra…
GO:0003723	F:RNA_binding	29	5.62685e-294	Transcript_006521;Transcript_013778;Transcript_015722;Transcript_029064;Transcript_045261;Transcript_047178;Transcript_085531;Transcript_085550;Transcript_102209;Transcript_104878;Transcript_120759;Transcript_121302;Transcript_124077;Transcript_124944;Transcript_126907;Transcript_181887;Transcript_196525;Transcript_197101;Transcript_201765;Transcript_202126;Transcript_203844;Transcript_204080;Tra…
GO:0003735	F:structural_constituent_of_ribosome	21	7.67563e-280	Transcript_015422;Transcript_019621;Transcript_021575;Transcript_025794;Transcript_028268;Transcript_029064;Transcript_029884;Transcript_030079;Transcript_034145;Transcript_036865;Transcript_041930;Transcript_069732;Transcript_111339;Transcript_121302;Transcript_165440;Transcript_180432;Transcript_201479;Transcript_204080;Transcript_206649;Transcript_208291;Transcript_230129
GO:0016874	F:ligase_activity	21	1.83988e-178	Transcript_004984;Transcript_005266;Transcript_005619;Transcript_008818;Transcript_014701;Transcript_015018;Transcript_017154;Transcript_027334;Transcript_030483;Transcript_044064;Transcript_104470;Transcript_109426;Transcript_139256;Transcript_151424;Transcript_167609;Transcript_171852;Transcript_191732;Transcript_207574;Transcript_218433;Transcript_225813;Transcript_232803
GO:0000166	F:nucleotide_binding	19	1.94749e-143	Transcript_013778;Transcript_019621;Transcript_035672;Transcript_046126;Transcript_085531;Transcript_102209;Transcript_131087;Transcript_131197;Transcript_181887;Transcript_190556;Transcript_201765;Transcript_201827;Transcript_203844;Transcript_220314;Transcript_226835;Transcript_231636;Transcript_237710;Transcript_241824;Transcript_243637
GO:0005509	F:calcium_ion_binding	14	2.03424e-122	Transcript_013751;Transcript_022911;Transcript_026249;Transcript_026328;Transcript_026702;Transcript_036840;Transcript_050448;Transcript_085549;Transcript_100826;Transcript_150958;Transcript_156028;Transcript_203180;Transcript_205166;Transcript_225884
GO:0004842	F:ubiquitin-protein_transferase_activity	13	8.67615e-116	Transcript_004984;Transcript_005619;Transcript_014701;Transcript_017154;Transcript_027334;Transcript_028065;Transcript_030483;Transcript_044064;Transcript_109426;Transcript_167609;Transcript_171852;Transcript_191732;Transcript_232803
GO:0044822	F:poly(A)_RNA_binding	13	9.38953e-88	Transcript_020644;Transcript_026141;Transcript_032544;Transcript_046126;Transcript_053224;Transcript_084126;Transcript_084534;Transcript_130786;Transcript_185787;Transcript_194105;Transcript_199136;Transcript_205045;Transcript_236828
GO:0005525	F:GTP_binding	12	8.82426e-175	Transcript_014869;Transcript_019030;Transcript_023041;Transcript_026130;Transcript_026510;Transcript_031089;Transcript_043054;Transcript_070575;Transcript_103018;Transcript_232311;Transcript_234064;Transcript_234101
GO:0031625	F:ubiquitin_protein_ligase_binding	12	1.07187e-145	Transcript_003957;Transcript_006961;Transcript_017628;Transcript_031135;Transcript_034289;Transcript_044064;Transcript_044618;Transcript_053308;Transcript_154532;Transcript_167609;Transcript_169084;Transcript_229195
GO:0005506	F:iron_ion_binding	11	3.78264e-110	Transcript_006381;Transcript_008834;Transcript_024307;Transcript_034277;Transcript_075155;Transcript_090790;Transcript_141681;Transcript_150337;Transcript_161381;Transcript_194031;Transcript_234615
GO:0016491	F:oxidoreductase_activity	11	6.51057e-101	Transcript_005249;Transcript_016788;Transcript_026046;Transcript_034648;Transcript_089751;Transcript_122407;Transcript_150337;Transcript_190900;Transcript_222136;Transcript_228197;Transcript_234615
GO:0001653	F:peptide_receptor_activity	10	2.32944e-114	Transcript_003957;Transcript_006961;Transcript_017628;Transcript_031135;Transcript_034289;Transcript_044618;Transcript_053308;Transcript_154532;Transcript_169084;Transcript_229195
GO:0004675	F:transmembrane_receptor_protein_serine/threonine_kinase_activity	10	7.37231e-112	Transcript_003957;Transcript_006961;Transcript_017628;Transcript_031135;Transcript_034289;Transcript_044618;Transcript_053308;Transcript_154532;Transcript_169084;Transcript_229195
GO:0020037	F:heme_binding	10	1.11775e-106	Transcript_006381;Transcript_027305;Transcript_034277;Transcript_075155;Transcript_090790;Transcript_141681;Transcript_161381;Transcript_194031;Transcript_198439;Transcript_230648
GO:0003676	F:nucleic_acid_binding	10	1.17625e-70	Transcript_014569;Transcript_019168;Transcript_090153;Transcript_169085;Transcript_174245;Transcript_181481;Transcript_201274;Transcript_216132;Transcript_235627;Transcript_242479
GO:0043565	F:sequence-specific_DNA_binding	9	2.75e-105	Transcript_006356;Transcript_021463;Transcript_021826;Transcript_036221;Transcript_059815;Transcript_084933;Transcript_113094;Transcript_158761;Transcript_237619
GO:0000287	F:magnesium_ion_binding_	9	5.68902e-85	Transcript_003866;Transcript_014869;Transcript_017434;Transcript_022231;Transcript_026157;Transcript_046591;Transcript_070575;Transcript_166578;Transcript_222358
GO:0030246	F:carbohydrate_binding_	9	8.05834e-67	Transcript_006961;Transcript_012691;Transcript_013109;Transcript_022911;Transcript_031657;Transcript_034685;Transcript_154532;Transcript_155035;Transcript_205169
GO:0016787	F:hydrolase_activity	8	7.01394e-100	Transcript_018886;Transcript_026510;Transcript_033139;Transcript_088350;Transcript_118543;Transcript_146566;Transcript_198874;Transcript_237710
GO:0042803	F:protein_homodimerization_activity	8	2.78759e-75	Transcript_000812;Transcript_003866;Transcript_006967;Transcript_027334;Transcript_186303;Transcript_200447;Transcript_206393;Transcript_236960
GO:0016757	F:transferase_activity,_transferring_glycosyl_groups_	8	1.20227e-41	Transcript_001446;Transcript_010173;Transcript_020376;Transcript_030020;Transcript_031089;Transcript_130941;Transcript_195880;Transcript_216339
GO:0004672	F:protein_kinase_activity	7	8.39641e-95	Transcript_123901;Transcript_133653;Transcript_149488;Transcript_152640;Transcript_169291;Transcript_191498;Transcript_225598
GO:0004190	F:aspartic-type_endopeptidase_activity_	7	4.81943e-56	Transcript_014569;Transcript_019168;Transcript_125911;Transcript_152354;Transcript_169085;Transcript_196075;Transcript_196525
GO:0005507	F:copper_ion_binding	7	1.59369e-55	Transcript_005249;Transcript_016788;Transcript_017791;Transcript_157574;Transcript_195280;Transcript_198376;Transcript_203858
GO:0016887	F:ATPase_activity	6	1.49771e-66	Transcript_005547;Transcript_013189;Transcript_112590;Transcript_169676;Transcript_230101;Transcript_238473
GO:0050660	F:flavin_adenine_dinucleotide_binding	6	1.05272e-48	Transcript_006455;Transcript_090816;Transcript_091504;Transcript_136647;Transcript_203920;Transcript_238909
GO:0042802	F:identical_protein_binding	6	1.37794e-42	Transcript_010715;Transcript_026446;Transcript_161380;Transcript_169084;Transcript_169291;Transcript_232311
GO:0016301	F:kinase_activity	6	1.23262e-38	Transcript_026157;Transcript_070575;Transcript_149488;Transcript_156614;Transcript_179869;Transcript_225598
GO:0008168	F:methyltransferase_activity	6	1.301e-35	Transcript_005332;Transcript_018089;Transcript_025338;Transcript_152745;Transcript_194671;Transcript_201923
GO:0051539	F:4_iron,_4_sulfur_cluster_binding	6	1.301e-35	Transcript_016808;Transcript_168654;Transcript_190556;Transcript_198439;Transcript_206393;Transcript_227968
GO:0003755	F:peptidyl-prolyl_cis-trans_isomerase_activity	6	4.53069e-31	Transcript_000349;Transcript_002570;Transcript_005547;Transcript_034648;Transcript_190598;Transcript_222876
GO:0003887	F:DNA-directed_DNA_polymerase_activity	6	5.8726e-16	Transcript_054998;Transcript_155116;Transcript_165408;Transcript_190556;Transcript_196525;Transcript_242859
GO:0003743	F:translation_initiation_factor_activity	5	6.93134e-50	Transcript_023041;Transcript_041927;Transcript_044761;Transcript_059095;Transcript_185787
GO:0004386	F:helicase_activity	5	4.00813e-41	Transcript_044761;Transcript_104878;Transcript_202126;Transcript_240217;Transcript_240948
GO:0015293	F:symporter_activity	5	1.79987e-33	Transcript_022464;Transcript_030947;Transcript_164909;Transcript_217335;Transcript_230859
GO:0015297	F:antiporter_activity	5	1.02127e-19	Transcript_147537;Transcript_157041;Transcript_161599;Transcript_165017;Transcript_192923
GO:0015171	F:amino_acid_transmembrane_transporter_activity	5	6.19779e-05	Transcript_022464;Transcript_030947;Transcript_161599;Transcript_164909;Transcript_192923
GO:0003924	F:GTPase_activity	4	4.40839e-105	Transcript_014869;Transcript_019030;Transcript_023041;Transcript_232311
GO:0019843	F:rRNA_binding	4	3.79745e-64	Transcript_021575;Transcript_036865;Transcript_169483;Transcript_230129
GO:0005215	F:transporter_activity	4	4.05087e-58	Transcript_013189;Transcript_026695;Transcript_151033;Transcript_183424
GO:0030170	F:pyridoxal_phosphate_binding	4	2.38923e-46	Transcript_021678;Transcript_161380;Transcript_190900;Transcript_240627
GO:0016705	F:oxidoreductase_activity,_acting_on_paired_donors,_with_incorporation_or_reduction_of_molecular_oxygen	4	1.11949e-38	Transcript_006381;Transcript_141681;Transcript_161381;Transcript_193996
GO:0061630	F:ubiquitin_protein_ligase_activity	4	4.60677e-31	Transcript_005619;Transcript_044064;Transcript_057485;Transcript_167609
GO:0044212	F:transcription_regulatory_region_DNA_binding	4	2.05153e-26	Transcript_014648;Transcript_026446;Transcript_199136;Transcript_237619
GO:0003729	F:mRNA_binding	4	6.77563e-25	Transcript_020644;Transcript_131087;Transcript_131197;Transcript_181887
GO:0003899	F:DNA-directed_RNA_polymerase_activity	4	2.69919e-23	Transcript_004956;Transcript_190451;Transcript_201274;Transcript_214542
GO:0005198	F:structural_molecule_activity	4	2.99536e-19	Transcript_029593;Transcript_041952;Transcript_047542;Transcript_151075
GO:0004177	F:aminopeptidase_activity	4	1.22825e-14	Transcript_010715;Transcript_020430;Transcript_026141;Transcript_207269
GO:0046982	F:protein_heterodimerization_activity	4	2.1573e-11	Transcript_009806;Transcript_031951;Transcript_200447;Transcript_244520
GO:0050897	F:cobalt_ion_binding	4	6.36634e-08	Transcript_165898;Transcript_186303;Transcript_208325;Transcript_220081
GO:0043531	F:ADP_binding_	3	3.49439e-60	Transcript_106701;Transcript_188595;Transcript_224237
GO:0051287	F:NAD_binding	3	5.49921e-51	Transcript_022231;Transcript_035652;Transcript_186303
GO:0004722	F:protein_serine/threonine_phosphatase_activity	3	5.49921e-51	Transcript_005103;Transcript_190222;Transcript_230386
GO:0004497	F:monooxygenase_activity	3	8.48603e-42	Transcript_006381;Transcript_141681;Transcript_161381
GO:0004519	F:endonuclease_activity	3	2.85636e-35	Transcript_019168;Transcript_169085;Transcript_196525
GO:0003964	F:RNA-directed_DNA_polymerase_activity	3	4.96899e-31	Transcript_019168;Transcript_169085;Transcript_196525
GO:0052689	F:carboxylic_ester_hydrolase_activity	3	4.98605e-29	Transcript_040695;Transcript_169444;Transcript_170093
GO:0004721	F:phosphoprotein_phosphatase_activity	3	4.98605e-29	Transcript_012381;Transcript_059985;Transcript_240875
GO:0008137	F:NADH_dehydrogenase_(ubiquinone)_activity	3	1.54758e-24	Transcript_016808;Transcript_027473;Transcript_227968
GO:0004222	F:metalloendopeptidase_activity	3	4.9333e-24	Transcript_007313;Transcript_007889;Transcript_030311
GO:0003777	F:microtubule_motor_activity	3	2.20034e-23	Transcript_087121;Transcript_112590;Transcript_169676
GO:0016758	F:transferase_activity,_transferring_hexosyl_groups	3	4.11104e-20	Transcript_010952;Transcript_115223;Transcript_142524
GO:0042626	F:ATPase_activity,_coupled_to_transmembrane_movement_of_substances	3	8.79984e-20	Transcript_019570;Transcript_114412;Transcript_151033
GO:0030599	F:pectinesterase_activity	3	1.72397e-18	Transcript_044266;Transcript_227236;Transcript_235233
GO:0008017	F:microtubule_binding	3	3.69086e-18	Transcript_070575;Transcript_090178;Transcript_234481
GO:0043621	F:protein_self-association	3	4.14076e-15	Transcript_056651;Transcript_123900;Transcript_232311
GO:0045330	F:aspartyl_esterase_activity	3	1.71348e-14	Transcript_044266;Transcript_227236;Transcript_235233
GO:0000049	F:tRNA_binding	3	1.71348e-14	Transcript_013972;Transcript_025631;Transcript_084126
GO:0004364	F:glutathione_transferase_activity	3	1.98799e-12	Transcript_008959;Transcript_033768;Transcript_188426
GO:0042302	F:structural_constituent_of_cuticle	3	2.91325e-10	Transcript_077349;Transcript_096153;Transcript_236228
GO:0008762	F:UDP-N-acetylmuramate_dehydrogenase_activity	3	8.68927e-10	Transcript_006455;Transcript_091504;Transcript_136647
GO:0033612	F:receptor_serine/threonine_kinase_binding	3	4.93267e-09	Transcript_053308;Transcript_169084;Transcript_229020
GO:0019706	F:protein-cysteine_S-palmitoyltransferase_activity	3	7.05865e-09	Transcript_194231;Transcript_201791;Transcript_204554
GO:0019899	F:enzyme_binding	3	1.45248e-08	Transcript_013087;Transcript_029593;Transcript_232902
GO:0030553	F:cGMP_binding	3	5.51816e-05	Transcript_022515;Transcript_169578;Transcript_192811
GO:0016866	F:intramolecular_transferase_activity	3	0.000103004	Transcript_030020;Transcript_090131;Transcript_231441
GO:0008568	F:microtubule-severing_ATPase_activity	3	0.0019588	Transcript_007798;Transcript_014711;Transcript_238473
GO:0004550	F:nucleoside_diphosphate_kinase_activity	3	0.00937514	Transcript_018441;Transcript_070575;Transcript_234047
GO:0004252	F:serine-type_endopeptidase_activity	2	5.37811e-52	Transcript_207269;Transcript_220081
GO:0009055	F:electron_carrier_activity	2	8.17451e-52	Transcript_019202;Transcript_195280
GO:0050661	F:NADP_binding	2	2.69452e-34	Transcript_032311;Transcript_178011
GO:0050662	F:coenzyme_binding	2	1.92817e-32	Transcript_003949;Transcript_241824
GO:0005096	F:GTPase_activator_activity_	2	1.55833e-28	Transcript_014885;Transcript_140349
GO:0004185	F:serine-type_carboxypeptidase_activity	2	7.09225e-28	Transcript_020891;Transcript_050046
GO:0022857	F:transmembrane_transporter_activity	2	1.6905e-26	Transcript_162704;Transcript_230671
GO:0016788	F:hydrolase_activity,_acting_on_ester_bonds	2	1.5736e-24	Transcript_019393;Transcript_033032
GO:0008233	F:peptidase_activity	2	2.32206e-24	Transcript_026141;Transcript_222074
GO:0003746	F:translation_elongation_factor_activity	2	4.90166e-23	Transcript_013497;Transcript_041535
GO:0004197	F:cysteine-type_endopeptidase_activity	2	1.55342e-20	Transcript_105109;Transcript_222074
GO:0003697	F:single-stranded_DNA_binding	2	4.60932e-19	Transcript_004956;Transcript_017392
GO:0046961	F:proton-transporting_ATPase_activity,_rotational_mechanism	2	1.98571e-17	Transcript_002006;Transcript_015364
GO:0000149	F:SNARE_binding	2	2.69226e-17	Transcript_016956;Transcript_175654
GO:0004553	F:hydrolase_activity,_hydrolyzing_O-glycosyl_compounds	2	3.91573e-17	Transcript_017904;Transcript_170776
GO:0016168	F:chlorophyll_binding	2	7.72858e-16	Transcript_023063;Transcript_035649
GO:0008236	F:serine-type_peptidase_activity	2	1.12094e-15	Transcript_010715;Transcript_056993
GO:0031418	F:L-ascorbic_acid_binding_	2	1.58988e-14	Transcript_024307;Transcript_200015
GO:0003993	F:acid_phosphatase_activity	2	2.33831e-14	Transcript_015717;Transcript_154296
GO:0048038	F:quinone_binding	2	2.33831e-14	Transcript_016808;Transcript_157574
GO:0004129	F:cytochrome-c_oxidase_activity	2	1.40122e-13	Transcript_017791;Transcript_090790
GO:0019901	F:protein_kinase_binding	2	6.40868e-13	Transcript_009916;Transcript_232902
GO:0003824	F:catalytic_activity_	2	3.80959e-12	Transcript_003949;Transcript_235765
GO:0042277	F:peptide_binding	2	1.72022e-11	Transcript_000349;Transcript_026141
GO:0042393	F:histone_binding	2	4.84337e-11	Transcript_043798;Transcript_242479
GO:0051087	F:chaperone_binding	2	3.09908e-10	Transcript_007908;Transcript_094276
GO:0008601	F:protein_phosphatase_type_2A_regulator_activity	2	6.58356e-10	Transcript_005547;Transcript_241737
GO:0003779	F:actin_binding_	2	8.78693e-10	Transcript_136647;Transcript_159115
GO:0008094	F:DNA-dependent_ATPase_activity	2	3.79257e-09	Transcript_199136;Transcript_204936
GO:0016298	F:lipase_activity	2	3.79257e-09	Transcript_190250;Transcript_229288
GO:0008121	F:ubiquinol-cytochrome-c_reductase_activity	2	1.1545e-08	Transcript_102552;Transcript_244637
GO:0008143	F:poly(A)_binding	2	3.20283e-08	Transcript_035672;Transcript_243637
GO:0008408	F:3'-5'_exonuclease_activity	2	1.37277e-07	Transcript_190556;Transcript_241666
GO:0004518	F:nuclease_activity	2	1.98259e-07	Transcript_060566;Transcript_235627
GO:0015450	F:P-P-bond-hydrolysis-driven_protein_transmembrane_transporter_activity	2	2.8673e-07	Transcript_026510;Transcript_239938
GO:0016791	F:phosphatase_activity	2	2.8673e-07	Transcript_003866;Transcript_005103
GO:0004535	F:poly(A)-specific_ribonuclease_activity	2	2.8673e-07	Transcript_197101;Transcript_241513
GO:0005315	F:inorganic_phosphate_transmembrane_transporter_activity	2	2.8673e-07	Transcript_165017;Transcript_167855
GO:0004806	F:triglyceride_lipase_activity_	2	3.85254e-07	Transcript_190250;Transcript_229288
GO:0003725	F:double-stranded_RNA_binding	2	5.49492e-07	Transcript_079032;Transcript_199136
GO:0004565	F:beta-galactosidase_activity	2	2.30838e-06	Transcript_013109;Transcript_205169
GO:0030552	F:cAMP_binding	2	6.43172e-06	Transcript_022515;Transcript_192811
GO:0008559	F:xenobiotic-transporting_ATPase_activity	2	9.12711e-06	Transcript_019570;Transcript_114412
GO:0004521	F:endoribonuclease_activity	2	2.63062e-05	Transcript_085550;Transcript_202003
GO:0051117	F:ATPase_binding	2	3.7538e-05	Transcript_029593;Transcript_232902
GO:0003950	F:NAD+_ADP-ribosyltransferase_activity	2	0.000583571	Transcript_007373;Transcript_209451
GO:0008320	F:protein_transmembrane_transporter_activity	2	0.00306682	Transcript_129194;Transcript_159638
GO:0005452	F:inorganic_anion_exchanger_activity	2	0.00604823	Transcript_206885;Transcript_228063
GO:0030619	F:U1_snRNA_binding	2	0.0113186	Transcript_032544;Transcript_131087
GO:0004301	F:epoxide_hydrolase_activity	2	0.0113186	Transcript_003866;Transcript_026141
GO:0050734	F:hydroxycinnamoyltransferase_activity_	2	0.0119362	Transcript_078594;Transcript_181667
GO:0001047	F:core_promoter_binding	2	0.0217664	Transcript_199136;Transcript_244520
GO:0016779	F:nucleotidyltransferase_activity_	2	0.0217664	Transcript_013972;Transcript_025631
GO:0032549	F:ribonucleoside_binding	2	0.0301859	Transcript_190451;Transcript_214542
GO:0080072	F:spermidine:sinapoyl_CoA_N-acyltransferase_activity	2	0.0418372	Transcript_078594;Transcript_181667
GO:0015140	F:malate_transmembrane_transporter_activity	2	0.0579137	Transcript_121498;Transcript_196785
GO:0016410	F:N-acyltransferase_activity	2	0.0579137	Transcript_078594;Transcript_181667
GO:0080075	F:spermidine:feruloyl_CoA_N-acyltransferase_activity	2	0.0764511	Transcript_078594;Transcript_181667
GO:0019829	F:cation-transporting_ATPase_activity	2	0.0764511	Transcript_201827;Transcript_203858
GO:0080074	F:spermidine:caffeoyl_CoA_N-acyltransferase_activity	2	0.0764511	Transcript_078594;Transcript_181667
GO:0080073	F:spermidine:coumaroyl_CoA_N-acyltransferase_activity	2	0.0800039	Transcript_078594;Transcript_181667
GO:0042826	F:histone_deacetylase_binding	2	0.0800039	Transcript_016456;Transcript_199136
GO:0033862	F:UMP_kinase_activity	2	0.19347	Transcript_016858;Transcript_213733
GO:0004576	F:oligosaccharyl_transferase_activity	2	0.19347	Transcript_004775;Transcript_237255
GO:0033730	F:arogenate_dehydrogenase_(NADP+)_activity	2	0.2618	Transcript_006354;Transcript_014426
GO:0008977	F:prephenate_dehydrogenase_activity	2	0.2618	Transcript_006354;Transcript_014426
GO:0004665	F:prephenate_dehydrogenase_(NADP+)_activity	2	0.2618	Transcript_006354;Transcript_014426
GO:0080139	F:borate_efflux_transmembrane_transporter_activity	2	0.341538	Transcript_206885;Transcript_228063
GO:0008081	F:phosphoric_diester_hydrolase_activity	2	0.454637	Transcript_150312;Transcript_162265
GO:0030507	F:spectrin_binding	2	0.776109	Transcript_029593;Transcript_232902
GO:0008974	F:phosphoribulokinase_activity	2	0.782301	Transcript_017984;Transcript_156286
GO:0004662	F:CAAX-protein_geranylgeranyltransferase_activity	2	1	Transcript_032683;Transcript_242727

## Sheet: GOBP
Category	Description	#Genes	pValue	Genes
GO:0006351	P:transcription,_DNA-templated	63	0	Transcript_004956;Transcript_005379;Transcript_006356;Transcript_009806;Transcript_014648;Transcript_015426;Transcript_015868;Transcript_016456;Transcript_018071;Transcript_019191;Transcript_021463;Transcript_021802;Transcript_021826;Transcript_026446;Transcript_027562;Transcript_029892;Transcript_036221;Transcript_041388;Transcript_046126;Transcript_046801;Transcript_050305;Transcript_059815;Tra…
GO:0006355	P:regulation_of_transcription,_DNA-templated	43	0	Transcript_005379;Transcript_012970;Transcript_014648;Transcript_015868;Transcript_016282;Transcript_017547;Transcript_018071;Transcript_021802;Transcript_022995;Transcript_026446;Transcript_029854;Transcript_029892;Transcript_036221;Transcript_046001;Transcript_046126;Transcript_046801;Transcript_056680;Transcript_119441;Transcript_123900;Transcript_124944;Transcript_136856;Transcript_137783;Tra…
GO:0006412	P:translation	21	1.49905e-270	Transcript_015422;Transcript_019621;Transcript_021575;Transcript_028268;Transcript_029064;Transcript_029884;Transcript_030079;Transcript_034145;Transcript_036865;Transcript_041930;Transcript_069732;Transcript_084534;Transcript_111339;Transcript_121302;Transcript_165440;Transcript_180432;Transcript_201479;Transcript_204080;Transcript_206649;Transcript_208291;Transcript_230129
GO:0016567	P:protein_ubiquitination	18	1.50595e-223	Transcript_008818;Transcript_014701;Transcript_017502;Transcript_030483;Transcript_034100;Transcript_044064;Transcript_050482;Transcript_063344;Transcript_065703;Transcript_104470;Transcript_171852;Transcript_181481;Transcript_189612;Transcript_191732;Transcript_207574;Transcript_218433;Transcript_225813;Transcript_228006
GO:0046777	P:protein_autophosphorylation	17	1.57305e-173	Transcript_003957;Transcript_006961;Transcript_014701;Transcript_017628;Transcript_031135;Transcript_034289;Transcript_044618;Transcript_053308;Transcript_070575;Transcript_123901;Transcript_133653;Transcript_148938;Transcript_152640;Transcript_154532;Transcript_169084;Transcript_202003;Transcript_229195
GO:0006397	P:mRNA_processing	17	1.4652e-86	Transcript_012381;Transcript_032544;Transcript_032946;Transcript_035672;Transcript_090153;Transcript_102209;Transcript_120759;Transcript_195069;Transcript_197101;Transcript_200172;Transcript_201765;Transcript_202003;Transcript_203844;Transcript_220314;Transcript_226835;Transcript_240948;Transcript_243637
GO:0015031	P:protein_transport	15	9.28823e-175	Transcript_011312;Transcript_016956;Transcript_018886;Transcript_020323;Transcript_026695;Transcript_041952;Transcript_044956;Transcript_089751;Transcript_146566;Transcript_155115;Transcript_191915;Transcript_198729;Transcript_207563;Transcript_234101;Transcript_242447
GO:0051301	P:cell_division	15	2.80757e-107	Transcript_018550;Transcript_027334;Transcript_083500;Transcript_093975;Transcript_140079;Transcript_146566;Transcript_153778;Transcript_159115;Transcript_162434;Transcript_163580;Transcript_175654;Transcript_223347;Transcript_228006;Transcript_229020;Transcript_234481
GO:0005975	P:carbohydrate_metabolic_process	14	2.21001e-144	Transcript_012691;Transcript_013109;Transcript_020714;Transcript_032093;Transcript_033387;Transcript_050448;Transcript_072565;Transcript_170776;Transcript_174303;Transcript_185930;Transcript_186471;Transcript_186964;Transcript_197339;Transcript_205169
GO:0071555	P:cell_wall_organization	13	1.61497e-133	Transcript_003949;Transcript_010173;Transcript_017904;Transcript_020376;Transcript_030020;Transcript_055095;Transcript_090131;Transcript_097235;Transcript_152744;Transcript_169444;Transcript_170093;Transcript_174303;Transcript_231441
GO:0009737	P:response_to_abscisic_acid	13	6.1666e-89	Transcript_006967;Transcript_016956;Transcript_032683;Transcript_041388;Transcript_085954;Transcript_153991;Transcript_158761;Transcript_163031;Transcript_169445;Transcript_190222;Transcript_193266;Transcript_235460;Transcript_238213
GO:0009793	P:embryo_development_ending_in_seed_dormancy	13	7.6123e-64	Transcript_002570;Transcript_007373;Transcript_014869;Transcript_026446;Transcript_163580;Transcript_169084;Transcript_178011;Transcript_188020;Transcript_198729;Transcript_200447;Transcript_222074;Transcript_228006;Transcript_234064
GO:0009651	P:response_to_salt_stress	12	1.24585e-136	Transcript_007373;Transcript_013021;Transcript_016956;Transcript_028226;Transcript_085954;Transcript_090131;Transcript_093975;Transcript_139274;Transcript_158761;Transcript_163031;Transcript_190222;Transcript_235460
GO:0008380	P:RNA_splicing	12	1.30541e-56	Transcript_020644;Transcript_032544;Transcript_032946;Transcript_102209;Transcript_120759;Transcript_181887;Transcript_200172;Transcript_201765;Transcript_202003;Transcript_203844;Transcript_220314;Transcript_226835
GO:0006952	P:defense_response	11	1.06523e-189	Transcript_006356;Transcript_030483;Transcript_072565;Transcript_085531;Transcript_106701;Transcript_137017;Transcript_151424;Transcript_188595;Transcript_197339;Transcript_201475;Transcript_205166
GO:0009755	P:hormone-mediated_signaling_pathway	11	3.13684e-112	Transcript_003957;Transcript_006961;Transcript_017628;Transcript_031135;Transcript_034289;Transcript_044618;Transcript_053308;Transcript_133653;Transcript_152640;Transcript_154532;Transcript_229195
GO:0055114	P:oxidation-reduction_process	11	5.72567e-69	Transcript_019202;Transcript_022975;Transcript_028226;Transcript_034277;Transcript_034648;Transcript_157574;Transcript_165898;Transcript_167468;Transcript_188426;Transcript_195280;Transcript_229288
GO:0007178	P:transmembrane_receptor_protein_serine/threonine_kinase_signaling_pathway	10	7.37231e-112	Transcript_003957;Transcript_006961;Transcript_017628;Transcript_031135;Transcript_034289;Transcript_044618;Transcript_053308;Transcript_154532;Transcript_169084;Transcript_229195
GO:0009414	P:response_to_water_deprivation	10	7.5888e-77	Transcript_021463;Transcript_028226;Transcript_030483;Transcript_032683;Transcript_114412;Transcript_157821;Transcript_158761;Transcript_163031;Transcript_171852;Transcript_190222
GO:0009908	P:flower_development	10	2.66087e-65	Transcript_015426;Transcript_018071;Transcript_021802;Transcript_026446;Transcript_027562;Transcript_095035;Transcript_124077;Transcript_152823;Transcript_224989;Transcript_232909
GO:0009734	P:auxin-activated_signaling_pathway	9	8.11215e-79	Transcript_002570;Transcript_009806;Transcript_019191;Transcript_026446;Transcript_030947;Transcript_123186;Transcript_146007;Transcript_149488;Transcript_162514
GO:0000398	P:mRNA_splicing,_via_spliceosome	9	2.74776e-41	Transcript_025019;Transcript_032544;Transcript_045261;Transcript_069308;Transcript_126907;Transcript_131197;Transcript_181887;Transcript_205045;Transcript_238363
GO:0006457	P:protein_folding	8	1.24458e-106	Transcript_000349;Transcript_007908;Transcript_022911;Transcript_034648;Transcript_056651;Transcript_190598;Transcript_207565;Transcript_222876
GO:0009409	P:response_to_cold	8	1.30672e-86	Transcript_027562;Transcript_028226;Transcript_041388;Transcript_157821;Transcript_158761;Transcript_163031;Transcript_190222;Transcript_241737
GO:0006281	P:DNA_repair	8	9.05728e-71	Transcript_005619;Transcript_054998;Transcript_165408;Transcript_167609;Transcript_168654;Transcript_186471;Transcript_187202;Transcript_204936
GO:0007049	P:cell_cycle_	8	4.1162e-58	Transcript_018550;Transcript_018886;Transcript_093975;Transcript_146566;Transcript_153778;Transcript_162434;Transcript_175654;Transcript_232311
GO:0016192	P:vesicle-mediated_transport	7	1.03576e-76	Transcript_018886;Transcript_035136;Transcript_043054;Transcript_047542;Transcript_103018;Transcript_222074;Transcript_222135
GO:0006979	P:response_to_oxidative_stress	7	6.94653e-74	Transcript_006455;Transcript_007373;Transcript_022198;Transcript_027305;Transcript_158761;Transcript_163031;Transcript_230648
GO:0009733	P:response_to_auxin	7	7.59115e-53	Transcript_005266;Transcript_026446;Transcript_032683;Transcript_041388;Transcript_123186;Transcript_139256;Transcript_235460
GO:0006468	P:protein_phosphorylation	7	8.72553e-52	Transcript_017434;Transcript_070575;Transcript_123901;Transcript_149488;Transcript_169084;Transcript_169578;Transcript_225598
GO:0007067	P:mitotic_nuclear_division	7	7.57695e-50	Transcript_070575;Transcript_090178;Transcript_140079;Transcript_222074;Transcript_223347;Transcript_228006;Transcript_234481
GO:0009658	P:chloroplast_organization	7	2.7126e-19	Transcript_014869;Transcript_042490;Transcript_056651;Transcript_099826;Transcript_169291;Transcript_188020;Transcript_232311
GO:0006886	P:intracellular_protein_transport	6	3.84428e-108	Transcript_026510;Transcript_043054;Transcript_047542;Transcript_103018;Transcript_161710;Transcript_175654
GO:0007275	P:multicellular_organismal_development	6	3.94873e-96	Transcript_009806;Transcript_016282;Transcript_017434;Transcript_029064;Transcript_209451;Transcript_216339
GO:0045893	P:positive_regulation_of_transcription,_DNA-templated	6	4.48844e-65	Transcript_009846;Transcript_021463;Transcript_027562;Transcript_093975;Transcript_095035;Transcript_113094
GO:0030154	P:cell_differentiation	6	2.55784e-60	Transcript_002570;Transcript_015426;Transcript_053308;Transcript_152823;Transcript_171519;Transcript_232909
GO:0009555	P:pollen_development	6	1.30165e-43	Transcript_018071;Transcript_043034;Transcript_078594;Transcript_112590;Transcript_169676;Transcript_181667
GO:0045892	P:negative_regulation_of_transcription,_DNA-templated	6	4.62504e-41	Transcript_016456;Transcript_059815;Transcript_118655;Transcript_123186;Transcript_158761;Transcript_237619
GO:0048364	P:root_development	6	1.27872e-36	Transcript_002570;Transcript_026446;Transcript_163580;Transcript_206885;Transcript_228063;Transcript_235658
GO:0006260	P:DNA_replication	6	4.53069e-31	Transcript_014919;Transcript_017392;Transcript_153778;Transcript_165408;Transcript_187202;Transcript_190556
GO:0010200	P:response_to_chitin	6	5.86765e-28	Transcript_030483;Transcript_059815;Transcript_113094;Transcript_151973;Transcript_158761;Transcript_237619
GO:0009408	P:response_to_heat	5	2.17441e-57	Transcript_021463;Transcript_028700;Transcript_059815;Transcript_163031;Transcript_207565
GO:0016042	P:lipid_catabolic_process	5	1.04509e-49	Transcript_013751;Transcript_019393;Transcript_033032;Transcript_190250;Transcript_229288
GO:0015979	P:photosynthesis	5	2.70735e-48	Transcript_036840;Transcript_099826;Transcript_100826;Transcript_156028;Transcript_158761
GO:0016311	P:dephosphorylation	5	8.03914e-35	Transcript_003866;Transcript_005103;Transcript_015717;Transcript_150284;Transcript_154296
GO:0006486	P:protein_glycosylation	5	5.62322e-30	Transcript_004775;Transcript_017448;Transcript_097235;Transcript_165441;Transcript_237255
GO:0009624	P:response_to_nematode	5	2.55058e-21	Transcript_090178;Transcript_114412;Transcript_165017;Transcript_167855;Transcript_199976
GO:0006869	P:lipid_transport	5	2.55058e-21	Transcript_013189;Transcript_020463;Transcript_061651;Transcript_067394;Transcript_069564
GO:0000911	P:cytokinesis_by_cell_plate_formation	5	5.04278e-17	Transcript_019030;Transcript_090178;Transcript_112590;Transcript_169676;Transcript_222074
GO:0048573	P:photoperiodism,_flowering	5	1.31991e-13	Transcript_007373;Transcript_021802;Transcript_041388;Transcript_093975;Transcript_229195
GO:0010102	P:lateral_root_morphogenesis_	5	3.26363e-05	Transcript_007373;Transcript_095418;Transcript_123186;Transcript_133653;Transcript_152640
GO:0046686	P:response_to_cadmium_ion	4	1.30105e-91	Transcript_005619;Transcript_033768;Transcript_146566;Transcript_151033
GO:0006633	P:fatty_acid_biosynthetic_process	4	7.96036e-61	Transcript_012173;Transcript_150337;Transcript_165898;Transcript_234615
GO:0009611	P:response_to_wounding	4	4.40136e-58	Transcript_085954;Transcript_114412;Transcript_158761;Transcript_222358
GO:0006511	P:ubiquitin-dependent_protein_catabolic_process	4	3.38361e-57	Transcript_013641;Transcript_044064;Transcript_167609;Transcript_244520
GO:0009873	P:ethylene-activated_signaling_pathway	4	1.72201e-56	Transcript_029855;Transcript_183975;Transcript_203858;Transcript_237619
GO:0007165	P:signal_transduction	4	6.31383e-51	Transcript_010386;Transcript_014885;Transcript_017434;Transcript_029593
GO:0043161	P:proteasome-mediated_ubiquitin-dependent_protein_catabolic_process	4	2.88168e-48	Transcript_016835;Transcript_151424;Transcript_167609;Transcript_232172
GO:0007264	P:small_GTPase_mediated_signal_transduction	4	1.03891e-38	Transcript_043054;Transcript_103018;Transcript_234064;Transcript_234101
GO:0006629	P:lipid_metabolic_process	4	4.11405e-35	Transcript_009042;Transcript_150312;Transcript_162265;Transcript_190250
GO:0006417	P:regulation_of_translation	4	6.17066e-35	Transcript_041927;Transcript_102209;Transcript_240948;Transcript_241513
GO:0016032	P:viral_process	4	1.90992e-34	Transcript_075155;Transcript_185787;Transcript_201475;Transcript_225598
GO:0015074	P:DNA_integration	4	6.69025e-29	Transcript_014569;Transcript_019168;Transcript_169085;Transcript_196525
GO:0009416	P:response_to_light_stimulus	4	1.45339e-28	Transcript_005266;Transcript_032947;Transcript_095035;Transcript_139256
GO:0009826	P:unidimensional_cell_growth	4	3.08233e-27	Transcript_002570;Transcript_035136;Transcript_041388;Transcript_222074
GO:0080167	P:response_to_karrikin	4	2.05153e-26	Transcript_004984;Transcript_087669;Transcript_164909;Transcript_193266
GO:0006887	P:exocytosis	4	4.39044e-26	Transcript_016956;Transcript_029593;Transcript_175654;Transcript_222074
GO:0009742	P:brassinosteroid_mediated_signaling_pathway	4	7.88088e-22	Transcript_003957;Transcript_059985;Transcript_146007;Transcript_169084
GO:0043066	P:negative_regulation_of_apoptotic_process	4	7.39184e-17	Transcript_009846;Transcript_057485;Transcript_234047;Transcript_244520
GO:0009585	P:red,_far-red_light_phototransduction	4	1.0649e-16	Transcript_021463;Transcript_041388;Transcript_169291;Transcript_181481
GO:0000413	P:protein_peptidyl-prolyl_isomerization	4	2.17145e-13	Transcript_000349;Transcript_002570;Transcript_005547;Transcript_034648
GO:0009636	P:response_to_toxic_substance	4	8.8311e-13	Transcript_003866;Transcript_028226;Transcript_033768;Transcript_188426
GO:0003333	P:amino_acid_transmembrane_transport	4	1.81438e-12	Transcript_022464;Transcript_030947;Transcript_161599;Transcript_164909
GO:0042981	P:regulation_of_apoptotic_process	4	2.14041e-09	Transcript_070575;Transcript_123901;Transcript_194105;Transcript_234047
GO:0016049	P:cell_growth	4	1.66036e-08	Transcript_016723;Transcript_027334;Transcript_155519;Transcript_244520
GO:0042742	P:defense_response_to_bacterium	3	5.85346e-88	Transcript_005619;Transcript_018071;Transcript_113094
GO:0055085	P:transmembrane_transport	3	5.2083e-76	Transcript_042224;Transcript_079175;Transcript_151033
GO:0009738	P:abscisic_acid-activated_signaling_pathway	3	8.62528e-67	Transcript_006967;Transcript_016726;Transcript_191498
GO:0045454	P:cell_redox_homeostasis	3	5.31632e-62	Transcript_090816;Transcript_146007;Transcript_213209
GO:0006470	P:protein_dephosphorylation	3	5.32281e-60	Transcript_005103;Transcript_190222;Transcript_230386
GO:0006364	P:rRNA_processing	3	1.92847e-50	Transcript_014869;Transcript_053224;Transcript_085550
GO:0035556	P:intracellular_signal_transduction	3	2.61587e-41	Transcript_017434;Transcript_123901;Transcript_149488
GO:0009753	P:response_to_jasmonic_acid	3	1.02379e-38	Transcript_018071;Transcript_235460;Transcript_237710
GO:0015991	P:ATP_hydrolysis_coupled_proton_transport	3	3.34258e-32	Transcript_002006;Transcript_015364;Transcript_032732
GO:0030244	P:cellulose_biosynthetic_process	3	3.45868e-27	Transcript_030020;Transcript_090131;Transcript_231441
GO:0006888	P:ER_to_Golgi_vesicle-mediated_transport	3	5.11418e-27	Transcript_029593;Transcript_041952;Transcript_161710
GO:0048366	P:leaf_development	3	1.08483e-25	Transcript_124077;Transcript_167303;Transcript_184034
GO:0006974	P:cellular_response_to_DNA_damage_stimulus	3	5.23204e-25	Transcript_016835;Transcript_190556;Transcript_200017
GO:0045490	P:pectin_catabolic_process	3	1.54758e-24	Transcript_044266;Transcript_227236;Transcript_235233
GO:0044281	P:small_molecule_metabolic_process	3	2.20034e-23	Transcript_003866;Transcript_026141;Transcript_033387
GO:0010228	P:vegetative_to_reproductive_phase_transition_of_meristem	3	2.20214e-22	Transcript_027334;Transcript_152823;Transcript_167609
GO:0006950	P:response_to_stress	3	2.81847e-20	Transcript_022849;Transcript_032019;Transcript_224734
GO:0009744	P:response_to_sucrose	3	3.69086e-18	Transcript_084933;Transcript_140079;Transcript_169578
GO:0048316	P:seed_development	3	9.18822e-16	Transcript_015426;Transcript_140079;Transcript_162434
GO:0048544	P:recognition_of_pollen	3	9.18822e-16	Transcript_006961;Transcript_030477;Transcript_154532
GO:0042545	P:cell_wall_modification	3	1.94329e-15	Transcript_044266;Transcript_227236;Transcript_235233
GO:0030433	P:ER-associated_ubiquitin-dependent_protein_catabolic_process	3	6.06086e-15	Transcript_026328;Transcript_175752;Transcript_228577
GO:0045489	P:pectin_biosynthetic_process	3	8.88693e-15	Transcript_010173;Transcript_020376;Transcript_152744
GO:0009816	P:defense_response_to_bacterium,_incompatible_interaction	3	5.22118e-14	Transcript_021463;Transcript_050482;Transcript_202003
GO:0009553	P:embryo_sac_development	3	7.59714e-14	Transcript_043034;Transcript_163580;Transcript_165017
GO:0006635	P:fatty_acid_beta-oxidation	3	2.36519e-13	Transcript_147537;Transcript_203920;Transcript_241534
GO:0010468	P:regulation_of_gene_expression	3	1.98799e-12	Transcript_133653;Transcript_152640;Transcript_200447
GO:0045944	P:positive_regulation_of_transcription_from_RNA_polymerase_II_promoter	3	2.421e-11	Transcript_199136;Transcript_234047;Transcript_244520
GO:0010091	P:trichome_branching	3	3.4997e-11	Transcript_018886;Transcript_155116;Transcript_232803
GO:0019253	P:reductive_pentose-phosphate_cycle	3	8.68927e-10	Transcript_017984;Transcript_156286;Transcript_235792
GO:0007030	P:Golgi_organization	3	2.42084e-09	Transcript_013087;Transcript_035136;Transcript_169084
GO:0009644	P:response_to_high_light_intensity	3	4.93267e-09	Transcript_028700;Transcript_158761;Transcript_163031
GO:0043687	P:post-translational_protein_modification	3	7.05865e-09	Transcript_034685;Transcript_093975;Transcript_228577
GO:0008285	P:negative_regulation_of_cell_proliferation	3	4.33674e-08	Transcript_053224;Transcript_095418;Transcript_124077
GO:0048477	P:oogenesis	3	4.33674e-08	Transcript_029064;Transcript_069308;Transcript_131197
GO:0010305	P:leaf_vascular_tissue_pattern_formation	3	1.15542e-07	Transcript_026446;Transcript_146007;Transcript_172381
GO:0006122	P:mitochondrial_electron_transport,_ubiquinol_to_cytochrome_c	3	9.09023e-07	Transcript_102552;Transcript_158543;Transcript_244637
GO:0030968	P:endoplasmic_reticulum_unfolded_protein_response	3	7.02754e-06	Transcript_026328;Transcript_034685;Transcript_202003
GO:0006261	P:DNA-dependent_DNA_replication	3	1.3894e-05	Transcript_054998;Transcript_155116;Transcript_242859
GO:0051131	P:chaperone-mediated_protein_complex_assembly	3	7.81161e-05	Transcript_129194;Transcript_159638;Transcript_207565
GO:0010089	P:xylem_development	3	7.81161e-05	Transcript_044618;Transcript_123900;Transcript_229020
GO:0048229	P:gametophyte_development	3	0.000554575	Transcript_053308;Transcript_112590;Transcript_169676
GO:0010215	P:cellulose_microfibril_organization	3	0.000554575	Transcript_016723;Transcript_139274;Transcript_155519
GO:0031122	P:cytoplasmic_microtubule_organization	3	0.00377334	Transcript_007798;Transcript_014711;Transcript_238473
GO:0006241	P:CTP_biosynthetic_process	3	0.00499225	Transcript_018441;Transcript_070575;Transcript_234047
GO:0006163	P:purine_nucleotide_metabolic_process	3	0.0052377	Transcript_070575;Transcript_204142;Transcript_234047
GO:0006228	P:UTP_biosynthetic_process	3	0.0241027	Transcript_018441;Transcript_070575;Transcript_234047
GO:0006183	P:GTP_biosynthetic_process	3	0.0241027	Transcript_018441;Transcript_070575;Transcript_234047
GO:0009558	P:embryo_sac_cellularization	3	0.638903	Transcript_112590;Transcript_169676;Transcript_234064
GO:0006810	P:transport	2	1.25165e-71	Transcript_211177;Transcript_227573
GO:0006970	P:response_to_osmotic_stress	2	1.28039e-42	Transcript_007373;Transcript_146007
GO:0006897	P:endocytosis	2	1.61337e-40	Transcript_029440;Transcript_098689
GO:0016568	P:chromatin_modification	2	6.82209e-37	Transcript_015868;Transcript_083500
GO:0009735	P:response_to_cytokinin	2	2.40267e-35	Transcript_002570;Transcript_140079
GO:0043547	P:positive_regulation_of_GTPase_activity	2	6.50863e-31	Transcript_031951;Transcript_059095
GO:0009909	P:regulation_of_flower_development	2	3.16061e-30	Transcript_021802;Transcript_041388
GO:0010150	P:leaf_senescence	2	1.46865e-29	Transcript_085531;Transcript_238213
GO:0007018	P:microtubule-based_movement	2	1.55833e-28	Transcript_112590;Transcript_169676
GO:0009751	P:response_to_salicylic_acid	2	3.48739e-28	Transcript_085954;Transcript_202003
GO:0006310	P:DNA_recombination	2	1.54638e-27	Transcript_153778;Transcript_196525
GO:0018298	P:protein-chromophore_linkage	2	3.40188e-27	Transcript_023063;Transcript_035649
GO:0042254	P:ribosome_biogenesis	2	2.28857e-26	Transcript_034522;Transcript_169483
GO:0051028	P:mRNA_transport	2	2.28857e-26	Transcript_240948;Transcript_242447
GO:0006508	P:proteolysis	2	4.97198e-26	Transcript_026141;Transcript_207269
GO:0006811	P:ion_transport	2	1.06862e-24	Transcript_000812;Transcript_151033
GO:0018105	P:peptidyl-serine_phosphorylation	2	1.06862e-24	Transcript_029440;Transcript_070575
GO:0045087	P:innate_immune_response	2	1.06468e-22	Transcript_005619;Transcript_027334
GO:0042744	P:hydrogen_peroxide_catabolic_process	2	1.57394e-22	Transcript_027305;Transcript_230648
GO:0009965	P:leaf_morphogenesis	2	7.66825e-22	Transcript_027334;Transcript_084933
GO:0007017	P:microtubule-based_process	2	6.63716e-20	Transcript_070575;Transcript_232311
GO:0010467	P:gene_expression	2	1.43273e-19	Transcript_032544;Transcript_084534
GO:0042542	P:response_to_hydrogen_peroxide	2	3.11649e-19	Transcript_028700;Transcript_163031
GO:0006396	P:RNA_processing	2	6.19175e-18	Transcript_124944;Transcript_199136
GO:0006906	P:vesicle_fusion	2	9.11442e-18	Transcript_016956;Transcript_175654
GO:0042787	P:protein_ubiquitination_involved_in_ubiquitin-dependent_protein_catabolic_process	2	9.11442e-18	Transcript_057485;Transcript_232803
GO:0016226	P:iron-sulfur_cluster_assembly	2	2.69226e-17	Transcript_183214;Transcript_206393
GO:0051258	P:protein_polymerization	2	5.70547e-17	Transcript_193266;Transcript_232311
GO:0009911	P:positive_regulation_of_flower_development	2	1.21792e-16	Transcript_027562;Transcript_152823
GO:0009739	P:response_to_gibberellin	2	1.7843e-16	Transcript_009806;Transcript_027562
GO:0010114	P:response_to_red_light	2	3.85035e-16	Transcript_029855;Transcript_169291
GO:0051603	P:proteolysis_involved_in_cellular_protein_catabolic_process	2	5.67103e-16	Transcript_030311;Transcript_105109
GO:0048481	P:ovule_development	2	7.72858e-16	Transcript_015426;Transcript_228006
GO:0006338	P:chromatin_remodeling	2	7.72858e-16	Transcript_029854;Transcript_242479
GO:0016055	P:Wnt_signaling_pathway	2	1.62865e-15	Transcript_029440;Transcript_123901
GO:0007052	P:mitotic_spindle_organization	2	2.37049e-15	Transcript_036865;Transcript_181887
GO:0051726	P:regulation_of_cell_cycle	2	7.38729e-15	Transcript_140079;Transcript_162434
GO:0009637	P:response_to_blue_light	2	7.38729e-15	Transcript_029855;Transcript_232311
GO:0006334	P:nucleosome_assembly	2	1.58988e-14	Transcript_021918;Transcript_130786
GO:0009736	P:cytokinin-activated_signaling_pathway	2	1.58988e-14	Transcript_002570;Transcript_003163
GO:0006366	P:transcription_from_RNA_polymerase_II_promoter	2	1.58988e-14	Transcript_214542;Transcript_244520
GO:0090502	P:RNA_phosphodiester_bond_hydrolysis,_endonucleolytic	2	4.37143e-13	Transcript_025338;Transcript_202003
GO:0008654	P:phospholipid_biosynthetic_process	2	9.41031e-13	Transcript_001446;Transcript_080859
GO:0009073	P:aromatic_amino_acid_family_biosynthetic_process	2	1.2515e-12	Transcript_017184;Transcript_178011
GO:0009615	P:response_to_virus	2	1.8107e-12	Transcript_199136;Transcript_225598
GO:0006108	P:malate_metabolic_process	2	2.6242e-12	Transcript_186303;Transcript_229288
GO:0010584	P:pollen_exine_formation	2	3.80959e-12	Transcript_078594;Transcript_181667
GO:0000724	P:double-strand_break_repair_via_homologous_recombination	2	8.06896e-12	Transcript_163580;Transcript_204936
GO:0010311	P:lateral_root_formation	2	2.5176e-11	Transcript_013972;Transcript_193266
GO:0051865	P:protein_autoubiquitination	2	2.5176e-11	Transcript_030483;Transcript_171852
GO:0009765	P:photosynthesis,_light_harvesting	2	4.84337e-11	Transcript_023063;Transcript_035649
GO:0016117	P:carotenoid_biosynthetic_process	2	1.01266e-10	Transcript_193996;Transcript_194031
GO:0022900	P:electron_transport_chain	2	1.01266e-10	Transcript_002006;Transcript_017791
GO:0007034	P:vacuolar_transport	2	1.46788e-10	Transcript_024907;Transcript_198729
GO:0042026	P:protein_refolding	2	2.13117e-10	Transcript_094276;Transcript_208330
GO:0007033	P:vacuole_organization	2	2.13117e-10	Transcript_018886;Transcript_165017
GO:0007346	P:regulation_of_mitotic_cell_cycle	2	1.26348e-09	Transcript_097307;Transcript_123901
GO:0009423	P:chorismate_biosynthetic_process	2	1.26348e-09	Transcript_017184;Transcript_178011
GO:0006879	P:cellular_iron_ion_homeostasis	2	1.81968e-09	Transcript_009948;Transcript_151033
GO:0048511	P:rhythmic_process	2	2.62494e-09	Transcript_027305;Transcript_029855
GO:0000272	P:polysaccharide_catabolic_process	2	2.62494e-09	Transcript_155035;Transcript_240042
GO:0046835	P:carbohydrate_phosphorylation	2	2.62494e-09	Transcript_148938;Transcript_224881
GO:0009788	P:negative_regulation_of_abscisic_acid-activated_signaling_pathway	2	3.79257e-09	Transcript_032683;Transcript_191498
GO:0010119	P:regulation_of_stomatal_movement	2	7.95403e-09	Transcript_041388;Transcript_203858
GO:0061077	P:chaperone-mediated_protein_folding	2	1.56149e-08	Transcript_002570;Transcript_188020
GO:0010118	P:stomatal_movement	2	1.67811e-08	Transcript_016956;Transcript_114412
GO:0008219	P:cell_death	2	2.23459e-08	Transcript_085531;Transcript_188020
GO:0031146	P:SCF-dependent_proteasomal_ubiquitin-dependent_protein_catabolic_process	2	4.59779e-08	Transcript_057485;Transcript_065703
GO:0009294	P:DNA_mediated_transformation	2	4.59779e-08	Transcript_006356;Transcript_118655
GO:0050821	P:protein_stabilization	2	1.37277e-07	Transcript_009846;Transcript_232902
GO:0010229	P:inflorescence_development	2	1.98259e-07	Transcript_152823;Transcript_195503
GO:0010628	P:positive_regulation_of_gene_expression	2	1.98259e-07	Transcript_003866;Transcript_232902
GO:0018279	P:protein_N-linked_glycosylation_via_asparagine	2	3.85254e-07	Transcript_034685;Transcript_228577
GO:0006487	P:protein_N-linked_glycosylation	2	4.15232e-07	Transcript_034685;Transcript_097235
GO:0007338	P:single_fertilization	2	7.84933e-07	Transcript_067394;Transcript_149202
GO:0009060	P:aerobic_respiration	2	1.12294e-06	Transcript_042431;Transcript_090790
GO:0034613	P:cellular_protein_localization	2	2.30838e-06	Transcript_013021;Transcript_232902
GO:0007517	P:muscle_organ_development	2	4.77142e-06	Transcript_159115;Transcript_244520
GO:0010227	P:floral_organ_abscission	2	4.77142e-06	Transcript_140349;Transcript_169084
GO:0007010	P:cytoskeleton_organization	2	6.43172e-06	Transcript_029593;Transcript_123901
GO:0000381	P:regulation_of_alternative_mRNA_splicing,_via_spliceosome	2	6.87286e-06	Transcript_131197;Transcript_181887
GO:0009790	P:embryo_development	2	9.12711e-06	Transcript_165017;Transcript_225813
GO:0040007	P:growth	2	1.29708e-05	Transcript_002006;Transcript_198729
GO:0010152	P:pollen_maturation	2	1.84593e-05	Transcript_165017;Transcript_169084
GO:0016573	P:histone_acetylation	2	1.84593e-05	Transcript_095035;Transcript_118655
GO:0009817	P:defense_response_to_fungus,_incompatible_interaction	2	1.84593e-05	Transcript_027334;Transcript_050482
GO:0072593	P:reactive_oxygen_species_metabolic_process	2	1.84593e-05	Transcript_003866;Transcript_043387
GO:0051568	P:histone_H3-K4_methylation	2	2.63062e-05	Transcript_043798;Transcript_173944
GO:0007062	P:sister_chromatid_cohesion	2	3.7538e-05	Transcript_159115;Transcript_163580
GO:0048653	P:anther_development	2	5.36312e-05	Transcript_157821;Transcript_163580
GO:0009960	P:endosperm_development	2	7.67105e-05	Transcript_222074;Transcript_234064
GO:0006464	P:cellular_protein_modification_process	2	0.000109833	Transcript_013810;Transcript_025019
GO:0006954	P:inflammatory_response	2	0.00014535	Transcript_003866;Transcript_026141
GO:0010207	P:photosystem_II_assembly	2	0.00014535	Transcript_008682;Transcript_034648
GO:0006605	P:protein_targeting	2	0.00014535	Transcript_214753;Transcript_239938
GO:0010051	P:xylem_and_phloem_pattern_formation	2	0.00014535	Transcript_026446;Transcript_123900
GO:0009116	P:nucleoside_metabolic_process	2	0.000205387	Transcript_026157;Transcript_235765
GO:0009690	P:cytokinin_metabolic_process	2	0.000205387	Transcript_091504;Transcript_191732
GO:0006874	P:cellular_calcium_ion_homeostasis	2	0.000290582	Transcript_003866;Transcript_232902
GO:0042632	P:cholesterol_homeostasis	2	0.000411585	Transcript_003866;Transcript_244520
GO:0019430	P:removal_of_superoxide_radicals	2	0.000583571	Transcript_043387;Transcript_238909
GO:0006207	P:'de_novo'_pyrimidine_nucleobase_biosynthetic_process	2	0.000828146	Transcript_014023;Transcript_031089
GO:0043966	P:histone_H3_acetylation	2	0.000828146	Transcript_095035;Transcript_173944
GO:0071806	P:protein_transmembrane_transport	2	0.00111369	Transcript_129194;Transcript_159638
GO:0009942	P:longitudinal_axis_specification	2	0.00111369	Transcript_026446;Transcript_157821
GO:0006471	P:protein_ADP-ribosylation	2	0.00111369	Transcript_043054;Transcript_103018
GO:0040011	P:locomotion	2	0.00111369	Transcript_087121;Transcript_159115
GO:0007411	P:axon_guidance	2	0.00117603	Transcript_029593;Transcript_232902
GO:0007399	P:nervous_system_development	2	0.00155945	Transcript_033387;Transcript_171519
GO:0010189	P:vitamin_E_biosynthetic_process	2	0.00155945	Transcript_148379;Transcript_152745
GO:0009567	P:double_fertilization_forming_a_zygote_and_endosperm	2	0.00155945	Transcript_067394;Transcript_149202
GO:0007498	P:mesoderm_development	2	0.00218592	Transcript_046002;Transcript_159115
GO:0000038	P:very_long-chain_fatty_acid_metabolic_process	2	0.0043058	Transcript_150337;Transcript_234615
GO:0034551	P:mitochondrial_respiratory_chain_complex_III_assembly	2	0.0043058	Transcript_129194;Transcript_159638
GO:0000244	P:spliceosomal_tri-snRNP_complex_assembly	2	0.00604823	Transcript_032544;Transcript_205045
GO:0002098	P:tRNA_wobble_uridine_modification	2	0.00849738	Transcript_013972;Transcript_025631
GO:0034047	P:regulation_of_protein_phosphatase_type_2A_activity	2	0.0113186	Transcript_005547;Transcript_241737
GO:0072661	P:protein_targeting_to_plasma_membrane	2	0.0113186	Transcript_029593;Transcript_232902
GO:0009800	P:cinnamic_acid_biosynthetic_process	2	0.0119362	Transcript_083009;Transcript_085954
GO:0044210	P:'de_novo'_CTP_biosynthetic_process	2	0.0156937	Transcript_016858;Transcript_213733
GO:0051453	P:regulation_of_intracellular_pH	2	0.0156937	Transcript_206885;Transcript_228063
GO:0051205	P:protein_insertion_into_membrane	2	0.0156937	Transcript_044457;Transcript_198875
GO:0019369	P:arachidonic_acid_metabolic_process	2	0.0217664	Transcript_003866;Transcript_026141
GO:0045037	P:protein_import_into_chloroplast_stroma	2	0.0301859	Transcript_000812;Transcript_236960
GO:0046488	P:phosphatidylinositol_metabolic_process	2	0.0301859	Transcript_001446;Transcript_080859
GO:0007586	P:digestion	2	0.0301859	Transcript_155035;Transcript_229288
GO:0007286	P:spermatid_development	2	0.0418372	Transcript_002006;Transcript_016456
GO:0006048	P:UDP-N-acetylglucosamine_biosynthetic_process	2	0.0418372	Transcript_034685;Transcript_186471
GO:0006571	P:tyrosine_biosynthetic_process	2	0.0418372	Transcript_006354;Transcript_014426
GO:0080111	P:DNA_demethylation	2	0.0579137	Transcript_153778;Transcript_168654
GO:0071423	P:malate_transmembrane_transport	2	0.0579137	Transcript_121498;Transcript_196785
GO:0009877	P:nodulation	2	0.0579137	Transcript_001570;Transcript_013064
GO:0080088	P:spermidine_hydroxycinnamate_conjugate_biosynthetic_process	2	0.0764511	Transcript_078594;Transcript_181667
GO:0035445	P:borate_transmembrane_transport	2	0.0764511	Transcript_206885;Transcript_228063
GO:0033523	P:histone_H2B_ubiquitination	2	0.0800039	Transcript_027334;Transcript_167609
GO:0072659	P:protein_localization_to_plasma_membrane	2	0.0800039	Transcript_123901;Transcript_232902
GO:0009405	P:pathogenesis	2	0.0800039	Transcript_001446;Transcript_118655
GO:0043171	P:peptide_catabolic_process	2	0.104405	Transcript_026141;Transcript_030311
GO:0043434	P:response_to_peptide_hormone	2	0.19347	Transcript_026141;Transcript_190250
GO:0018344	P:protein_geranylgeranylation	2	0.255255	Transcript_032683;Transcript_242727
GO:0042276	P:error-prone_translesion_synthesis	2	0.341538	Transcript_054998;Transcript_242859
GO:0006220	P:pyrimidine_nucleotide_metabolic_process	2	0.600207	Transcript_070575;Transcript_234047
GO:0001934	P:positive_regulation_of_protein_phosphorylation	2	0.600207	Transcript_123901;Transcript_244520
GO:0034227	P:tRNA_thio-modification	2	0.600207	Transcript_013972;Transcript_025631
GO:0032447	P:protein_urmylation	2	0.600207	Transcript_013972;Transcript_025631
GO:0009142	P:nucleoside_triphosphate_biosynthetic_process	2	0.782301	Transcript_070575;Transcript_234047
