# Supplementary material for: Characterization of Transcriptome Dynamics during Early Fruit Development in Olive (Olea europaea L.)
Source: Int J Mol Sci. 2023 Jan 4;24(2):961. doi: 10.3390/ijms24020961 (PMC9864153; doi:10.3390/ijms24020961)
Supplement: Supplementary file 1 [file ijms-24-00961-s001.zip › Table S12_P28_VS_P14_DOWN_Functional_Enrichment.xlsx]

## Sheet: Functional_Enrichment
Supplementary Table S12. The enrichment analysis of GO terms based on down-regulated DEGs DEGs in the expanding fruits at 28 (P28) DPA versus the dividing fruits at 14 (P14) during early olive fruit development
Category	Description	#Genes	pValue	Genes
GO:0008270	F:zinc_ion_binding	124	0	Transcript_000056;Transcript_004905;Transcript_005845;Transcript_006390;Transcript_008823;Transcript_009537;Transcript_009745;Transcript_012987;Transcript_013777;Transcript_014344;Transcript_014461;Transcript_014881;Transcript_016420;Transcript_016689;Transcript_018841;Transcript_018842;Transcript_019935;Transcript_020276;Transcript_021152;Transcript_021851;Transcript_021957;Transcript_022952;Tra…
GO:0009507	C:chloroplast	178	0	Transcript_002215;Transcript_002810;Transcript_005179;Transcript_005986;Transcript_006334;Transcript_006370;Transcript_006390;Transcript_007448;Transcript_007473;Transcript_007649;Transcript_008095;Transcript_008323;Transcript_008396;Transcript_008643;Transcript_008882;Transcript_009494;Transcript_010592;Transcript_010828;Transcript_011114;Transcript_013619;Transcript_013672;Transcript_013777;Tra…
GO:0003677	F:DNA_binding	163	0	Transcript_000082;Transcript_002021;Transcript_006467;Transcript_006557;Transcript_007448;Transcript_007694;Transcript_008432;Transcript_012568;Transcript_012987;Transcript_013042;Transcript_014461;Transcript_015927;Transcript_016001;Transcript_016179;Transcript_016420;Transcript_016698;Transcript_018221;Transcript_018858;Transcript_019885;Transcript_020746;Transcript_022974;Transcript_023060;Tra…
GO:0005886	C:plasma_membrane	240	0	Transcript_000223;Transcript_001031;Transcript_002021;Transcript_002169;Transcript_002519;Transcript_002675;Transcript_003016;Transcript_006438;Transcript_006795;Transcript_007304;Transcript_007448;Transcript_007967;Transcript_008354;Transcript_008678;Transcript_009556;Transcript_009701;Transcript_009970;Transcript_010355;Transcript_011264;Transcript_011266;Transcript_011923;Transcript_012422;Tra…
GO:0005634	C:nucleus	429	0	Transcript_000082;Transcript_000211;Transcript_000361;Transcript_001104;Transcript_002021;Transcript_002427;Transcript_002519;Transcript_003016;Transcript_003302;Transcript_003601;Transcript_003602;Transcript_004649;Transcript_005135;Transcript_005845;Transcript_006150;Transcript_006195;Transcript_006467;Transcript_006542;Transcript_006557;Transcript_006795;Transcript_006923;Transcript_007694;Tra…
GO:0005524	F:ATP_binding	363	0	Transcript_000223;Transcript_000361;Transcript_000724;Transcript_001256;Transcript_001691;Transcript_002169;Transcript_003016;Transcript_003555;Transcript_004963;Transcript_004977;Transcript_005402;Transcript_006132;Transcript_006195;Transcript_006438;Transcript_006675;Transcript_006978;Transcript_007304;Transcript_007382;Transcript_007414;Transcript_007427;Transcript_007967;Transcript_008009;Tra…
GO:0016021	C:integral_component_of_membrane	417	0	Transcript_000032;Transcript_001031;Transcript_001032;Transcript_001971;Transcript_002169;Transcript_002810;Transcript_003555;Transcript_004469;Transcript_004778;Transcript_004851;Transcript_004905;Transcript_004982;Transcript_005179;Transcript_005630;Transcript_005985;Transcript_006438;Transcript_006721;Transcript_006913;Transcript_007304;Transcript_007414;Transcript_007967;Transcript_008298;Tra…
GO:0005739	C:mitochondrion	118	0	Transcript_002215;Transcript_002810;Transcript_006390;Transcript_006675;Transcript_007900;Transcript_010828;Transcript_012779;Transcript_015479;Transcript_016540;Transcript_016624;Transcript_016986;Transcript_017394;Transcript_017733;Transcript_017917;Transcript_018331;Transcript_018511;Transcript_018713;Transcript_018784;Transcript_019529;Transcript_020239;Transcript_020553;Transcript_021257;Tra…
GO:0006351	P:transcription,_DNA-templated	180	0	Transcript_000082;Transcript_006542;Transcript_006557;Transcript_006795;Transcript_007694;Transcript_008176;Transcript_009704;Transcript_009730;Transcript_009760;Transcript_009825;Transcript_011939;Transcript_012568;Transcript_013042;Transcript_013172;Transcript_014508;Transcript_016001;Transcript_016179;Transcript_016420;Transcript_016473;Transcript_016601;Transcript_016657;Transcript_016698;Tra…
GO:0005737	C:cytoplasm	289	0	Transcript_001031;Transcript_001256;Transcript_002427;Transcript_002519;Transcript_002621;Transcript_003016;Transcript_003601;Transcript_004649;Transcript_004764;Transcript_004842;Transcript_004843;Transcript_005402;Transcript_006195;Transcript_006236;Transcript_006542;Transcript_006795;Transcript_006978;Transcript_008163;Transcript_008432;Transcript_008582;Transcript_008597;Transcript_009730;Tra…
GO:0005794	C:Golgi_apparatus	72	2.03851e-275	Transcript_001032;Transcript_001104;Transcript_004469;Transcript_004982;Transcript_005015;Transcript_009757;Transcript_009970;Transcript_010111;Transcript_012422;Transcript_013942;Transcript_014494;Transcript_014681;Transcript_015116;Transcript_015198;Transcript_016567;Transcript_017347;Transcript_018712;Transcript_018757;Transcript_021558;Transcript_022100;Transcript_025995;Transcript_026222;Tra…
GO:0003700	F:sequence-specific_DNA_binding_transcription_factor_activity	90	7.15816e-268	Transcript_005135;Transcript_006542;Transcript_006557;Transcript_007694;Transcript_008176;Transcript_009760;Transcript_011939;Transcript_016001;Transcript_016179;Transcript_016420;Transcript_016473;Transcript_016601;Transcript_018221;Transcript_019684;Transcript_023646;Transcript_025821;Transcript_027814;Transcript_027836;Transcript_028211;Transcript_028447;Transcript_030819;Transcript_030836;Tra…
GO:0004674	F:protein_serine/threonine_kinase_activity	75	1.00839e-233	Transcript_000361;Transcript_002169;Transcript_006438;Transcript_007427;Transcript_007967;Transcript_008009;Transcript_010355;Transcript_012506;Transcript_012807;Transcript_014161;Transcript_014265;Transcript_015942;Transcript_015977;Transcript_016625;Transcript_016831;Transcript_018502;Transcript_019367;Transcript_019961;Transcript_020405;Transcript_027687;Transcript_030740;Transcript_031338;Tra…
GO:0005576	C:extracellular_region	64	3.19189e-212	Transcript_000791;Transcript_001865;Transcript_003497;Transcript_004493;Transcript_005963;Transcript_006795;Transcript_006886;Transcript_008009;Transcript_010073;Transcript_010467;Transcript_014088;Transcript_014798;Transcript_016328;Transcript_024035;Transcript_025932;Transcript_028368;Transcript_031041;Transcript_031290;Transcript_041988;Transcript_042796;Transcript_043767;Transcript_059666;Tra…
GO:0005789	C:endoplasmic_reticulum_membrane	58	5.96103e-212	Transcript_009034;Transcript_012422;Transcript_013966;Transcript_014681;Transcript_016203;Transcript_018164;Transcript_018256;Transcript_018920;Transcript_019295;Transcript_020405;Transcript_021285;Transcript_023674;Transcript_026322;Transcript_028401;Transcript_029457;Transcript_032040;Transcript_034041;Transcript_039015;Transcript_041626;Transcript_043014;Transcript_043752;Transcript_045319;Tra…
GO:0003723	F:RNA_binding	74	2.47032e-206	Transcript_001691;Transcript_006307;Transcript_008432;Transcript_009730;Transcript_011484;Transcript_011878;Transcript_013172;Transcript_014461;Transcript_016657;Transcript_019885;Transcript_020362;Transcript_024178;Transcript_025598;Transcript_026077;Transcript_026515;Transcript_026774;Transcript_028833;Transcript_029924;Transcript_032972;Transcript_036952;Transcript_041888;Transcript_043282;Tra…
GO:0003735	F:structural_constituent_of_ribosome	68	1.84547e-193	Transcript_001111;Transcript_004470;Transcript_006434;Transcript_006602;Transcript_007059;Transcript_007649;Transcript_007679;Transcript_009505;Transcript_013258;Transcript_013664;Transcript_015971;Transcript_016218;Transcript_017394;Transcript_017396;Transcript_018304;Transcript_018528;Transcript_022570;Transcript_022733;Transcript_026269;Transcript_026774;Transcript_030297;Transcript_032203;Tra…
GO:0005783	C:endoplasmic_reticulum_	62	1.52796e-190	Transcript_001032;Transcript_001104;Transcript_002621;Transcript_004469;Transcript_005449;Transcript_008597;Transcript_010111;Transcript_012422;Transcript_013966;Transcript_014759;Transcript_015578;Transcript_016203;Transcript_016209;Transcript_018164;Transcript_018256;Transcript_018744;Transcript_018841;Transcript_019295;Transcript_020405;Transcript_021558;Transcript_025498;Transcript_025797;Tra…
GO:0006412	P:translation	66	1.10999e-188	Transcript_001111;Transcript_004470;Transcript_006434;Transcript_006602;Transcript_007059;Transcript_007649;Transcript_007679;Transcript_009505;Transcript_013258;Transcript_013664;Transcript_015971;Transcript_016218;Transcript_017394;Transcript_017396;Transcript_018304;Transcript_018528;Transcript_022570;Transcript_022733;Transcript_026269;Transcript_026774;Transcript_030297;Transcript_032203;Tra…
GO:0000139	C:Golgi_membrane	49	2.50211e-165	Transcript_001032;Transcript_001971;Transcript_002675;Transcript_004469;Transcript_004851;Transcript_004905;Transcript_004982;Transcript_013942;Transcript_027175;Transcript_027303;Transcript_028401;Transcript_033017;Transcript_034534;Transcript_035627;Transcript_035629;Transcript_043014;Transcript_043404;Transcript_043752;Transcript_046845;Transcript_051590;Transcript_058380;Transcript_062135;Tra…
GO:0016567	P:protein_ubiquitination	52	1.59848e-164	Transcript_004649;Transcript_008202;Transcript_008597;Transcript_008823;Transcript_013734;Transcript_014759;Transcript_014881;Transcript_016689;Transcript_018519;Transcript_021020;Transcript_023102;Transcript_028007;Transcript_030009;Transcript_031434;Transcript_031835;Transcript_031866;Transcript_032532;Transcript_033045;Transcript_044014;Transcript_046257;Transcript_048069;Transcript_083204;Tra…
GO:0009570	C:chloroplast_stroma	40	8.70893e-145	Transcript_006334;Transcript_007649;Transcript_008095;Transcript_011114;Transcript_013777;Transcript_014604;Transcript_018511;Transcript_018842;Transcript_020906;Transcript_021247;Transcript_022196;Transcript_023301;Transcript_024497;Transcript_026077;Transcript_026269;Transcript_034344;Transcript_035046;Transcript_035963;Transcript_037644;Transcript_043282;Transcript_047691;Transcript_099844;Tra…
GO:0016874	F:ligase_activity	44	1.01887e-140	Transcript_008202;Transcript_008597;Transcript_014512;Transcript_014759;Transcript_014881;Transcript_016689;Transcript_025456;Transcript_029089;Transcript_030009;Transcript_032532;Transcript_034047;Transcript_041558;Transcript_044014;Transcript_069110;Transcript_090430;Transcript_100197;Transcript_106058;Transcript_122229;Transcript_123520;Transcript_123857;Transcript_131389;Transcript_153091;Tra…
GO:0005730	C:nucleolus	63	2.49012e-140	Transcript_003601;Transcript_006390;Transcript_006795;Transcript_007448;Transcript_007868;Transcript_012987;Transcript_014649;Transcript_015425;Transcript_017225;Transcript_017924;Transcript_018940;Transcript_023999;Transcript_026774;Transcript_027323;Transcript_027575;Transcript_029996;Transcript_032315;Transcript_038402;Transcript_041560;Transcript_041888;Transcript_043071;Transcript_044789;Tra…
GO:0015031	P:protein_transport	37	6.37389e-138	Transcript_004155;Transcript_004905;Transcript_006150;Transcript_010537;Transcript_017347;Transcript_018712;Transcript_022145;Transcript_023404;Transcript_023676;Transcript_027098;Transcript_027175;Transcript_031747;Transcript_032252;Transcript_034316;Transcript_043468;Transcript_045968;Transcript_062135;Transcript_080040;Transcript_082198;Transcript_118749;Transcript_148169;Transcript_158532;Tra…
GO:0005773	C:vacuole	37	1.78932e-134	Transcript_002675;Transcript_008678;Transcript_009757;Transcript_012826;Transcript_015927;Transcript_018304;Transcript_018525;Transcript_028795;Transcript_038402;Transcript_041422;Transcript_041560;Transcript_045319;Transcript_050081;Transcript_059666;Transcript_089463;Transcript_098323;Transcript_127606;Transcript_139231;Transcript_144277;Transcript_147891;Transcript_149601;Transcript_154489;Tra…
GO:0006952	P:defense_response	49	3.04706e-132	Transcript_007304;Transcript_008678;Transcript_014870;Transcript_014881;Transcript_016204;Transcript_018718;Transcript_020324;Transcript_023102;Transcript_026329;Transcript_033045;Transcript_033383;Transcript_041372;Transcript_061772;Transcript_088334;Transcript_096837;Transcript_097377;Transcript_122229;Transcript_125015;Transcript_134246;Transcript_147921;Transcript_149601;Transcript_158717;Tra…
GO:0046777	P:protein_autophosphorylation	44	5.50076e-132	Transcript_000361;Transcript_007427;Transcript_009970;Transcript_010355;Transcript_012506;Transcript_014265;Transcript_019961;Transcript_026258;Transcript_034582;Transcript_037105;Transcript_053567;Transcript_079340;Transcript_081569;Transcript_093212;Transcript_095793;Transcript_100502;Transcript_107140;Transcript_127606;Transcript_145272;Transcript_157999;Transcript_159854;Transcript_163320;Tra…
GO:0005618	C:cell_wall_	49	3.12306e-130	Transcript_003497;Transcript_014604;Transcript_014649;Transcript_016328;Transcript_018940;Transcript_025565;Transcript_025932;Transcript_031041;Transcript_032436;Transcript_033984;Transcript_034831;Transcript_050081;Transcript_059666;Transcript_064798;Transcript_069670;Transcript_077461;Transcript_079374;Transcript_090681;Transcript_095767;Transcript_101405;Transcript_105933;Transcript_136126;Tra…
GO:0005774	C:vacuolar_membrane	44	4.28903e-128	Transcript_002675;Transcript_002810;Transcript_006390;Transcript_006675;Transcript_007448;Transcript_012407;Transcript_018525;Transcript_020455;Transcript_029113;Transcript_033984;Transcript_034831;Transcript_038402;Transcript_045319;Transcript_049892;Transcript_089463;Transcript_098323;Transcript_100187;Transcript_102614;Transcript_127987;Transcript_139231;Transcript_144277;Transcript_155268;Tra…
GO:0000166	F:nucleotide_binding	29	2.16541e-125	Transcript_013172;Transcript_023301;Transcript_024178;Transcript_026515;Transcript_026524;Transcript_026764;Transcript_028833;Transcript_042437;Transcript_042932;Transcript_048932;Transcript_065762;Transcript_097610;Transcript_115897;Transcript_124610;Transcript_128010;Transcript_131597;Transcript_149420;Transcript_158530;Transcript_165598;Transcript_171195;Transcript_180390;Transcript_180857;Tra…
GO:0005840	C:ribosome_	38	5.77475e-124	Transcript_001111;Transcript_004470;Transcript_006602;Transcript_007649;Transcript_007679;Transcript_013664;Transcript_015971;Transcript_016218;Transcript_017394;Transcript_018528;Transcript_022570;Transcript_022733;Transcript_030297;Transcript_032203;Transcript_033020;Transcript_035138;Transcript_044977;Transcript_053087;Transcript_055969;Transcript_088864;Transcript_122696;Transcript_146844;Tra…
GO:0005525	F:GTP_binding	48	1.04125e-122	Transcript_002675;Transcript_004764;Transcript_004842;Transcript_004843;Transcript_008354;Transcript_010526;Transcript_012392;Transcript_016567;Transcript_016986;Transcript_017225;Transcript_017347;Transcript_018712;Transcript_023404;Transcript_027057;Transcript_030679;Transcript_041446;Transcript_041684;Transcript_042217;Transcript_043075;Transcript_043875;Transcript_044858;Transcript_045057;Tra…
GO:0031625	F:ubiquitin_protein_ligase_binding	31	2.02093e-116	Transcript_008597;Transcript_009970;Transcript_010355;Transcript_014759;Transcript_026258;Transcript_093212;Transcript_095793;Transcript_100502;Transcript_123520;Transcript_123857;Transcript_127606;Transcript_157999;Transcript_163320;Transcript_167277;Transcript_168520;Transcript_170391;Transcript_182614;Transcript_191180;Transcript_191679;Transcript_195263;Transcript_197004;Transcript_199469;Tra…
GO:0009651	P:response_to_salt_stress	27	5.57355e-113	Transcript_003302;Transcript_005015;Transcript_006390;Transcript_007694;Transcript_031559;Transcript_038402;Transcript_041372;Transcript_042062;Transcript_042883;Transcript_063895;Transcript_096297;Transcript_099209;Transcript_103275;Transcript_143778;Transcript_150574;Transcript_155240;Transcript_170163;Transcript_184704;Transcript_185552;Transcript_185779;Transcript_192119;Transcript_209211;Tra…
ko03010	Ribosome	53	1.57928e-111	Transcript_004470;Transcript_006602;Transcript_007059;Transcript_007473;Transcript_007649;Transcript_007868;Transcript_009505;Transcript_013258;Transcript_013664;Transcript_017396;Transcript_018304;Transcript_018528;Transcript_022733;Transcript_026269;Transcript_026774;Transcript_032203;Transcript_033020;Transcript_035138;Transcript_039434;Transcript_044835;Transcript_044977;Transcript_048069;Tra…
GO:0005768	C:endosome_	25	1.9472e-106	Transcript_004469;Transcript_004982;Transcript_008354;Transcript_010111;Transcript_021558;Transcript_025995;Transcript_043404;Transcript_044160;Transcript_071779;Transcript_074927;Transcript_076237;Transcript_088132;Transcript_089868;Transcript_096106;Transcript_160512;Transcript_164019;Transcript_170115;Transcript_185131;Transcript_206246;Transcript_218648;Transcript_219802;Transcript_222019;Tra…
GO:0005975	P:carbohydrate_metabolic_process	43	1.12057e-105	Transcript_005053;Transcript_007900;Transcript_008678;Transcript_010174;Transcript_011228;Transcript_016328;Transcript_017810;Transcript_017853;Transcript_023370;Transcript_025932;Transcript_041445;Transcript_043532;Transcript_064798;Transcript_075347;Transcript_077036;Transcript_078260;Transcript_108985;Transcript_144405;Transcript_153867;Transcript_155913;Transcript_176122;Transcript_180845;Tra…
GO:0009535	C:chloroplast_thylakoid_membrane	36	4.03834e-105	Transcript_005179;Transcript_006390;Transcript_009053;Transcript_014604;Transcript_015999;Transcript_016146;Transcript_017733;Transcript_018416;Transcript_026424;Transcript_028942;Transcript_029217;Transcript_032799;Transcript_038206;Transcript_051101;Transcript_079322;Transcript_101984;Transcript_108618;Transcript_142152;Transcript_145533;Transcript_152342;Transcript_155818;Transcript_155928;Tra…
GO:0005743	C:mitochondrial_inner_membrane	40	2.78979e-103	Transcript_002810;Transcript_004880;Transcript_005630;Transcript_009070;Transcript_016315;Transcript_017917;Transcript_021257;Transcript_023555;Transcript_026611;Transcript_026708;Transcript_036083;Transcript_038425;Transcript_039199;Transcript_040111;Transcript_043185;Transcript_045165;Transcript_045337;Transcript_045968;Transcript_057971;Transcript_084246;Transcript_093530;Transcript_150099;Tra…
GO:0071555	P:cell_wall_organization	42	1.98077e-96	Transcript_004851;Transcript_005015;Transcript_012883;Transcript_014494;Transcript_014798;Transcript_015198;Transcript_016328;Transcript_025565;Transcript_025932;Transcript_027303;Transcript_031041;Transcript_031290;Transcript_035627;Transcript_046845;Transcript_051590;Transcript_058380;Transcript_074927;Transcript_077461;Transcript_087796;Transcript_101405;Transcript_105933;Transcript_136126;Tra…
GO:0009941	C:chloroplast_envelope	40	1.3084e-95	Transcript_007649;Transcript_013672;Transcript_014604;Transcript_015003;Transcript_016721;Transcript_017733;Transcript_018416;Transcript_020906;Transcript_021247;Transcript_023301;Transcript_025498;Transcript_026269;Transcript_026424;Transcript_026760;Transcript_030819;Transcript_032252;Transcript_044327;Transcript_045165;Transcript_047691;Transcript_051101;Transcript_055215;Transcript_078260;Tra…
GO:0004842	F:ubiquitin-protein_transferase_activity	28	3.51242e-95	Transcript_008597;Transcript_014759;Transcript_014881;Transcript_025456;Transcript_029089;Transcript_034047;Transcript_041558;Transcript_090430;Transcript_100197;Transcript_112483;Transcript_122229;Transcript_123520;Transcript_123857;Transcript_189146;Transcript_203246;Transcript_209986;Transcript_212191;Transcript_215401;Transcript_222869;Transcript_223414;Transcript_224727;Transcript_228061;Tra…
GO:0005654	C:nucleoplasm	35	6.96531e-95	Transcript_006150;Transcript_006542;Transcript_012987;Transcript_015798;Transcript_017329;Transcript_024541;Transcript_031363;Transcript_036736;Transcript_039672;Transcript_041692;Transcript_043478;Transcript_044789;Transcript_046257;Transcript_050421;Transcript_051286;Transcript_057518;Transcript_058642;Transcript_101332;Transcript_128010;Transcript_133402;Transcript_139813;Transcript_142487;Tra…
GO:0005509	F:calcium_ion_binding	36	5.84321e-94	Transcript_004469;Transcript_010111;Transcript_010369;Transcript_016203;Transcript_016431;Transcript_021018;Transcript_021643;Transcript_023042;Transcript_024497;Transcript_028320;Transcript_029297;Transcript_029746;Transcript_031102;Transcript_033383;Transcript_042217;Transcript_045319;Transcript_049149;Transcript_057971;Transcript_062135;Transcript_069455;Transcript_079322;Transcript_149814;Tra…
GO:0001653	F:peptide_receptor_activity	25	1.79811e-93	Transcript_009970;Transcript_010355;Transcript_026258;Transcript_093212;Transcript_095793;Transcript_100502;Transcript_127606;Transcript_157999;Transcript_163320;Transcript_167277;Transcript_168520;Transcript_170391;Transcript_182614;Transcript_191180;Transcript_191679;Transcript_195263;Transcript_197004;Transcript_199469;Transcript_203446;Transcript_222241;Transcript_223826;Transcript_230943;Tra…
GO:0009755	P:hormone-mediated_signaling_pathway	25	8.29271e-93	Transcript_006542;Transcript_009970;Transcript_010355;Transcript_026258;Transcript_093212;Transcript_095793;Transcript_100502;Transcript_127606;Transcript_157999;Transcript_163320;Transcript_167277;Transcript_170391;Transcript_182614;Transcript_191180;Transcript_191679;Transcript_195263;Transcript_197004;Transcript_199469;Transcript_203446;Transcript_222241;Transcript_223826;Transcript_230943;Tra…
GO:0070062	C:extracellular_exosome	33	1.23159e-92	Transcript_012262;Transcript_014114;Transcript_015798;Transcript_016571;Transcript_016986;Transcript_018791;Transcript_026452;Transcript_041445;Transcript_042380;Transcript_043532;Transcript_043594;Transcript_046257;Transcript_078776;Transcript_079344;Transcript_088645;Transcript_101433;Transcript_110572;Transcript_120546;Transcript_133402;Transcript_137810;Transcript_142487;Transcript_197714;Tra…
ko01200	Carbon_metabolism	38	2.18139e-91	Transcript_007900;Transcript_014114;Transcript_016540;Transcript_016946;Transcript_017810;Transcript_020906;Transcript_023212;Transcript_027666;Transcript_031909;Transcript_034831;Transcript_035046;Transcript_038026;Transcript_041676;Transcript_044198;Transcript_082227;Transcript_089776;Transcript_108985;Transcript_121426;Transcript_142152;Transcript_149539;Transcript_150940;Transcript_161222;Tra…
GO:0004675	F:transmembrane_receptor_protein_serine/threonine_kinase_activity	25	3.65496e-91	Transcript_009970;Transcript_010355;Transcript_026258;Transcript_093212;Transcript_095793;Transcript_100502;Transcript_127606;Transcript_157999;Transcript_163320;Transcript_167277;Transcript_168520;Transcript_170391;Transcript_182614;Transcript_191180;Transcript_191679;Transcript_195263;Transcript_197004;Transcript_199469;Transcript_203446;Transcript_222241;Transcript_223826;Transcript_230943;Tra…
GO:0007178	P:transmembrane_receptor_protein_serine/threonine_kinase_signaling_pathway	25	3.65496e-91	Transcript_009970;Transcript_010355;Transcript_026258;Transcript_093212;Transcript_095793;Transcript_100502;Transcript_127606;Transcript_157999;Transcript_163320;Transcript_167277;Transcript_168520;Transcript_170391;Transcript_182614;Transcript_191180;Transcript_191679;Transcript_195263;Transcript_197004;Transcript_199469;Transcript_203446;Transcript_222241;Transcript_223826;Transcript_230943;Tra…
GO:0006457	P:protein_folding	20	2.24399e-89	Transcript_002621;Transcript_003016;Transcript_014604;Transcript_025598;Transcript_026452;Transcript_029746;Transcript_037644;Transcript_045319;Transcript_048202;Transcript_095486;Transcript_110097;Transcript_133402;Transcript_149814;Transcript_156926;Transcript_157570;Transcript_166879;Transcript_175511;Transcript_194549;Transcript_208901;Transcript_211478
GO:0005802	C:trans-Golgi_network	23	7.5685e-89	Transcript_004469;Transcript_004982;Transcript_010111;Transcript_016567;Transcript_021558;Transcript_025370;Transcript_025995;Transcript_040180;Transcript_043404;Transcript_044160;Transcript_074927;Transcript_076237;Transcript_089868;Transcript_145272;Transcript_160512;Transcript_164019;Transcript_170115;Transcript_193394;Transcript_218648;Transcript_219802;Transcript_223263;Transcript_224265;Tra…
GO:0020037	F:heme_binding	25	1.39382e-86	Transcript_001865;Transcript_017917;Transcript_018511;Transcript_020455;Transcript_023674;Transcript_029457;Transcript_036083;Transcript_040997;Transcript_042298;Transcript_043681;Transcript_044496;Transcript_059959;Transcript_060152;Transcript_090971;Transcript_114216;Transcript_160352;Transcript_176865;Transcript_190763;Transcript_193233;Transcript_196627;Transcript_212035;Transcript_225775;Tra…
ko01230	Biosynthesis_of_amino_acids	33	4.6907e-84	Transcript_000056;Transcript_008396;Transcript_010836;Transcript_011114;Transcript_013619;Transcript_014114;Transcript_016540;Transcript_016946;Transcript_018746;Transcript_023212;Transcript_027666;Transcript_028047;Transcript_034831;Transcript_035046;Transcript_038026;Transcript_041676;Transcript_042248;Transcript_042822;Transcript_089776;Transcript_090733;Transcript_108985;Transcript_109203;Tra…
GO:0009409	P:response_to_cold	10	3.386e-83	Transcript_003016;Transcript_020324;Transcript_024005;Transcript_025598;Transcript_042062;Transcript_049892;Transcript_090430;Transcript_185552;Transcript_232525;Transcript_243612
GO:0043565	F:sequence-specific_DNA_binding	26	3.41276e-83	Transcript_005135;Transcript_008176;Transcript_009760;Transcript_011939;Transcript_016473;Transcript_016601;Transcript_019684;Transcript_022100;Transcript_025821;Transcript_027814;Transcript_027836;Transcript_031619;Transcript_039589;Transcript_040270;Transcript_042062;Transcript_169635;Transcript_185145;Transcript_192644;Transcript_195313;Transcript_205677;Transcript_207585;Transcript_210615;Tra…
GO:0051301	P:cell_division	40	1.12178e-78	Transcript_000211;Transcript_001031;Transcript_003302;Transcript_007763;Transcript_008616;Transcript_015116;Transcript_016024;Transcript_016237;Transcript_016485;Transcript_020142;Transcript_027057;Transcript_027192;Transcript_029712;Transcript_031363;Transcript_031434;Transcript_033017;Transcript_033208;Transcript_034661;Transcript_038402;Transcript_044539;Transcript_048706;Transcript_081381;Tra…
GO:0006886	P:intracellular_protein_transport	29	2.46228e-78	Transcript_001104;Transcript_002675;Transcript_008354;Transcript_015783;Transcript_015947;Transcript_018757;Transcript_025370;Transcript_039199;Transcript_041422;Transcript_043014;Transcript_043468;Transcript_044971;Transcript_065327;Transcript_096106;Transcript_101433;Transcript_119088;Transcript_147891;Transcript_156026;Transcript_176002;Transcript_184894;Transcript_185131;Transcript_187119;Tra…
GO:0005506	F:iron_ion_binding	38	3.87609e-78	Transcript_006542;Transcript_018164;Transcript_018331;Transcript_020455;Transcript_021247;Transcript_023674;Transcript_024085;Transcript_024375;Transcript_028047;Transcript_029457;Transcript_034041;Transcript_036083;Transcript_040997;Transcript_042298;Transcript_043681;Transcript_044496;Transcript_052099;Transcript_052466;Transcript_090971;Transcript_094008;Transcript_095790;Transcript_114216;Tra…
ko04141	Protein_processing_in_endoplasmic_reticulum	44	9.66695e-78	Transcript_002621;Transcript_003016;Transcript_004469;Transcript_008202;Transcript_008597;Transcript_010111;Transcript_014759;Transcript_016571;Transcript_018958;Transcript_021735;Transcript_022485;Transcript_028007;Transcript_029746;Transcript_034582;Transcript_040960;Transcript_043014;Transcript_045319;Transcript_052856;Transcript_061518;Transcript_083204;Transcript_087040;Transcript_106058;Tra…
GO:0048046	C:apoplast_	37	1.43109e-77	Transcript_003701;Transcript_012060;Transcript_012506;Transcript_018514;Transcript_018525;Transcript_018841;Transcript_024129;Transcript_025565;Transcript_033984;Transcript_035581;Transcript_042960;Transcript_044198;Transcript_046112;Transcript_090681;Transcript_098704;Transcript_121426;Transcript_133357;Transcript_142152;Transcript_147921;Transcript_151165;Transcript_152390;Transcript_167488;Tra…
GO:0016787	F:hydrolase_activity	27	3.78674e-76	Transcript_006370;Transcript_006390;Transcript_010828;Transcript_011264;Transcript_015667;Transcript_021881;Transcript_025189;Transcript_025855;Transcript_032723;Transcript_035390;Transcript_080059;Transcript_095911;Transcript_146959;Transcript_157859;Transcript_159017;Transcript_166263;Transcript_171325;Transcript_188434;Transcript_188712;Transcript_189382;Transcript_192363;Transcript_203659;Tra…
GO:0009737	P:response_to_abscisic_acid	24	1.62396e-75	Transcript_007694;Transcript_018802;Transcript_024005;Transcript_025598;Transcript_031559;Transcript_034176;Transcript_042062;Transcript_096297;Transcript_097775;Transcript_156161;Transcript_168520;Transcript_170163;Transcript_179976;Transcript_185779;Transcript_192119;Transcript_192644;Transcript_194997;Transcript_201458;Transcript_209986;Transcript_224727;Transcript_229938;Transcript_232525;Tra…
GO:0007275	P:multicellular_organismal_development	22	3.68682e-75	Transcript_009704;Transcript_015116;Transcript_019060;Transcript_022100;Transcript_025456;Transcript_028368;Transcript_029089;Transcript_041113;Transcript_044539;Transcript_089427;Transcript_100197;Transcript_101405;Transcript_109626;Transcript_140451;Transcript_196414;Transcript_216007;Transcript_222323;Transcript_224109;Transcript_227255;Transcript_228967;Transcript_231660;Transcript_242291
GO:0016491	F:oxidoreductase_activity	34	3.99774e-74	Transcript_004155;Transcript_006773;Transcript_009381;Transcript_013410;Transcript_015584;Transcript_018331;Transcript_019935;Transcript_030205;Transcript_032272;Transcript_033984;Transcript_034041;Transcript_044097;Transcript_045640;Transcript_047321;Transcript_053182;Transcript_057859;Transcript_083010;Transcript_109930;Transcript_131936;Transcript_153953;Transcript_155689;Transcript_158294;Tra…
GO:0004672	F:protein_kinase_activity	24	2.72576e-73	Transcript_000361;Transcript_003555;Transcript_004977;Transcript_007427;Transcript_009556;Transcript_010355;Transcript_014265;Transcript_028197;Transcript_033017;Transcript_034660;Transcript_081569;Transcript_091769;Transcript_100502;Transcript_143441;Transcript_163769;Transcript_187639;Transcript_188104;Transcript_197004;Transcript_220376;Transcript_235878;Transcript_236384;Transcript_237366;Tra…
GO:0003924	F:GTPase_activity	32	5.44101e-70	Transcript_002675;Transcript_004764;Transcript_004842;Transcript_004843;Transcript_008354;Transcript_010526;Transcript_012392;Transcript_016567;Transcript_016986;Transcript_017225;Transcript_030679;Transcript_041684;Transcript_043075;Transcript_043875;Transcript_044858;Transcript_045057;Transcript_046508;Transcript_103380;Transcript_147891;Transcript_150246;Transcript_168236;Transcript_172603;Tra…
GO:0046686	P:response_to_cadmium_ion	21	3.36417e-69	Transcript_006334;Transcript_006675;Transcript_010828;Transcript_011264;Transcript_015798;Transcript_022974;Transcript_035390;Transcript_044198;Transcript_046112;Transcript_096297;Transcript_121426;Transcript_142487;Transcript_147891;Transcript_157859;Transcript_185779;Transcript_199741;Transcript_203246;Transcript_206170;Transcript_230419;Transcript_230751;Transcript_238051
GO:0042742	P:defense_response_to_bacterium	17	1.05808e-68	Transcript_012060;Transcript_014461;Transcript_015927;Transcript_016657;Transcript_023102;Transcript_033045;Transcript_061772;Transcript_100502;Transcript_142152;Transcript_166804;Transcript_167228;Transcript_191165;Transcript_196773;Transcript_197004;Transcript_202542;Transcript_222544;Transcript_238051
GO:0044822	F:poly(A)_RNA_binding	31	6.98348e-68	Transcript_003601;Transcript_003602;Transcript_012262;Transcript_016986;Transcript_022100;Transcript_026774;Transcript_029996;Transcript_043594;Transcript_043875;Transcript_051286;Transcript_058642;Transcript_095317;Transcript_104913;Transcript_125114;Transcript_135796;Transcript_149420;Transcript_150018;Transcript_153181;Transcript_157447;Transcript_159255;Transcript_175896;Transcript_200038;Tra…
GO:0000287	F:magnesium_ion_binding_	27	2.90999e-64	Transcript_000852;Transcript_005986;Transcript_010526;Transcript_010836;Transcript_011114;Transcript_014528;Transcript_014600;Transcript_031663;Transcript_032229;Transcript_034054;Transcript_037155;Transcript_062774;Transcript_077756;Transcript_089776;Transcript_120546;Transcript_148826;Transcript_148905;Transcript_149348;Transcript_156988;Transcript_183290;Transcript_203310;Transcript_227776;Tra…
GO:0006397	P:mRNA_processing	39	4.1517e-64	Transcript_006795;Transcript_007427;Transcript_014265;Transcript_023301;Transcript_026077;Transcript_026515;Transcript_026764;Transcript_034582;Transcript_041888;Transcript_048932;Transcript_065762;Transcript_066301;Transcript_081569;Transcript_097610;Transcript_131597;Transcript_149080;Transcript_149420;Transcript_153181;Transcript_155268;Transcript_158530;Transcript_167985;Transcript_175896;Tra…
GO:0003676	F:nucleic_acid_binding	16	9.90398e-64	Transcript_013527;Transcript_013909;Transcript_016415;Transcript_032315;Transcript_049116;Transcript_066301;Transcript_074557;Transcript_084112;Transcript_155389;Transcript_158012;Transcript_173618;Transcript_197515;Transcript_206484;Transcript_224027;Transcript_224363;Transcript_242218
GO:0009908	P:flower_development	12	4.69866e-63	Transcript_011878;Transcript_012568;Transcript_042145;Transcript_079374;Transcript_108837;Transcript_143265;Transcript_169244;Transcript_181238;Transcript_182308;Transcript_196215;Transcript_196773;Transcript_222390
ko03040	Spliceosome	28	2.65804e-62	Transcript_006849;Transcript_020362;Transcript_026515;Transcript_028952;Transcript_030798;Transcript_033816;Transcript_041888;Transcript_042932;Transcript_043873;Transcript_066301;Transcript_097610;Transcript_149080;Transcript_149744;Transcript_153181;Transcript_159255;Transcript_173618;Transcript_175896;Transcript_182308;Transcript_187789;Transcript_191819;Transcript_191863;Transcript_193507;Tra…
GO:0042803	F:protein_homodimerization_activity	19	2.67581e-62	Transcript_021257;Transcript_025498;Transcript_034016;Transcript_042077;Transcript_043402;Transcript_120546;Transcript_152339;Transcript_153373;Transcript_166590;Transcript_185779;Transcript_194992;Transcript_194997;Transcript_209045;Transcript_221914;Transcript_229005;Transcript_229938;Transcript_238051;Transcript_239667;Transcript_242079
GO:0009414	P:response_to_water_deprivation	23	4.17966e-62	Transcript_024005;Transcript_026193;Transcript_028447;Transcript_031557;Transcript_042062;Transcript_042145;Transcript_063895;Transcript_090430;Transcript_099209;Transcript_103275;Transcript_145272;Transcript_147921;Transcript_150574;Transcript_155240;Transcript_156161;Transcript_156926;Transcript_181429;Transcript_185552;Transcript_192119;Transcript_225177;Transcript_225582;Transcript_227686;Tra…
ko04144	Endocytosis	16	8.29269e-62	Transcript_002675;Transcript_027502;Transcript_040180;Transcript_042004;Transcript_043468;Transcript_084010;Transcript_101433;Transcript_157618;Transcript_185131;Transcript_185415;Transcript_193507;Transcript_197714;Transcript_206246;Transcript_212485;Transcript_222407;Transcript_239448
GO:0005874	C:microtubule	27	9.78753e-62	Transcript_001256;Transcript_004764;Transcript_004842;Transcript_009001;Transcript_010889;Transcript_012506;Transcript_016436;Transcript_018082;Transcript_026452;Transcript_029875;Transcript_030679;Transcript_043075;Transcript_045057;Transcript_050497;Transcript_079374;Transcript_103380;Transcript_154820;Transcript_163901;Transcript_168236;Transcript_168591;Transcript_175416;Transcript_179927;Tra…
GO:0016192	P:vesicle-mediated_transport	20	3.36473e-61	Transcript_010537;Transcript_014681;Transcript_015947;Transcript_017347;Transcript_018082;Transcript_018712;Transcript_018757;Transcript_021558;Transcript_023676;Transcript_025510;Transcript_041422;Transcript_044971;Transcript_048363;Transcript_096106;Transcript_156026;Transcript_169723;Transcript_187119;Transcript_196018;Transcript_218015;Transcript_226688
GO:0055085	P:transmembrane_transport	15	4.64355e-60	Transcript_009070;Transcript_026322;Transcript_031605;Transcript_043294;Transcript_118749;Transcript_169520;Transcript_186722;Transcript_200150;Transcript_204657;Transcript_211117;Transcript_219033;Transcript_222312;Transcript_231056;Transcript_235192;Transcript_235414
GO:0009734	P:auxin-activated_signaling_pathway	26	8.09551e-60	Transcript_018802;Transcript_019743;Transcript_022445;Transcript_028007;Transcript_028447;Transcript_030667;Transcript_034176;Transcript_041922;Transcript_061518;Transcript_080441;Transcript_135542;Transcript_149776;Transcript_155731;Transcript_181018;Transcript_192644;Transcript_192715;Transcript_195811;Transcript_196414;Transcript_200461;Transcript_201458;Transcript_218673;Transcript_225964;Tra…
ko00190	Oxidative_phosphorylation	22	1.47887e-59	Transcript_004880;Transcript_005630;Transcript_009757;Transcript_017917;Transcript_018784;Transcript_020239;Transcript_023779;Transcript_026611;Transcript_038425;Transcript_042963;Transcript_043185;Transcript_058642;Transcript_080670;Transcript_093530;Transcript_152859;Transcript_168752;Transcript_205374;Transcript_213719;Transcript_219022;Transcript_230419;Transcript_230655;Transcript_239152
GO:0005887	C:integral_component_of_plasma_membrane_	10	1.63538e-59	Transcript_002384;Transcript_042104;Transcript_063605;Transcript_079344;Transcript_083711;Transcript_085884;Transcript_097145;Transcript_100187;Transcript_184894;Transcript_213817
ko03013	RNA_transport	20	1.83787e-59	Transcript_003602;Transcript_006150;Transcript_014461;Transcript_016560;Transcript_030122;Transcript_041560;Transcript_042932;Transcript_043594;Transcript_092175;Transcript_118749;Transcript_136358;Transcript_148931;Transcript_149744;Transcript_205336;Transcript_208937;Transcript_215917;Transcript_224218;Transcript_234158;Transcript_235250;Transcript_241440
GO:0030154	P:cell_differentiation	7	2.05608e-59	Transcript_009121;Transcript_022100;Transcript_036202;Transcript_042145;Transcript_046257;Transcript_169244;Transcript_237581
ko00500	Starch_and_sucrose_metabolism	15	5.55264e-58	Transcript_008643;Transcript_012883;Transcript_025190;Transcript_031290;Transcript_040039;Transcript_069670;Transcript_074927;Transcript_144405;Transcript_151634;Transcript_155240;Transcript_218648;Transcript_233010;Transcript_233387;Transcript_235608;Transcript_236296
GO:0045893	P:positive_regulation_of_transcription,_DNA-templated	12	9.34961e-58	Transcript_006542;Transcript_006557;Transcript_011939;Transcript_042145;Transcript_055024;Transcript_108837;Transcript_143778;Transcript_149060;Transcript_180831;Transcript_187506;Transcript_210991;Transcript_239667
ko05169	Epstein-Barr_virus_infection	22	1.13305e-57	Transcript_005845;Transcript_008616;Transcript_012987;Transcript_031618;Transcript_078776;Transcript_093018;Transcript_098438;Transcript_150478;Transcript_152118;Transcript_171325;Transcript_173351;Transcript_180390;Transcript_186849;Transcript_188712;Transcript_191303;Transcript_193507;Transcript_195934;Transcript_201468;Transcript_214254;Transcript_226800;Transcript_234735;Transcript_241708
GO:0006979	P:response_to_oxidative_stress	21	1.28548e-57	Transcript_001865;Transcript_011264;Transcript_014512;Transcript_018511;Transcript_018802;Transcript_027279;Transcript_031909;Transcript_034176;Transcript_035390;Transcript_042062;Transcript_042145;Transcript_060152;Transcript_156926;Transcript_157859;Transcript_170163;Transcript_190763;Transcript_196627;Transcript_197824;Transcript_233284;Transcript_238422;Transcript_239152
ko05016	Huntington's_disease	28	3.34583e-57	Transcript_004880;Transcript_005630;Transcript_017917;Transcript_018784;Transcript_019608;Transcript_020239;Transcript_023779;Transcript_026611;Transcript_027502;Transcript_038425;Transcript_043185;Transcript_043468;Transcript_044737;Transcript_045165;Transcript_058642;Transcript_067992;Transcript_093018;Transcript_093530;Transcript_098438;Transcript_101433;Transcript_150478;Transcript_169520;Tra…
GO:0006281	P:DNA_repair	20	4.42233e-57	Transcript_009825;Transcript_015798;Transcript_022196;Transcript_023610;Transcript_026221;Transcript_031480;Transcript_090284;Transcript_142487;Transcript_145917;Transcript_155807;Transcript_197824;Transcript_202654;Transcript_206107;Transcript_212191;Transcript_215297;Transcript_224333;Transcript_227802;Transcript_229005;Transcript_233893;Transcript_236505
GO:0055114	P:oxidation-reduction_process	22	4.98737e-57	Transcript_009053;Transcript_009692;Transcript_013777;Transcript_014604;Transcript_015584;Transcript_017917;Transcript_018784;Transcript_020239;Transcript_037644;Transcript_041922;Transcript_044737;Transcript_058642;Transcript_083010;Transcript_156926;Transcript_158955;Transcript_193233;Transcript_223263;Transcript_228049;Transcript_230655;Transcript_232471;Transcript_235200;Transcript_241845
GO:0005622	C:intracellular_	18	6.85997e-57	Transcript_014528;Transcript_023404;Transcript_026221;Transcript_039721;Transcript_043022;Transcript_080040;Transcript_109012;Transcript_113548;Transcript_119088;Transcript_148996;Transcript_152161;Transcript_176002;Transcript_202863;Transcript_224027;Transcript_225913;Transcript_232921;Transcript_237130;Transcript_240214
ko04120	Ubiquitin_mediated_proteolysis	24	7.15947e-57	Transcript_008202;Transcript_008597;Transcript_014759;Transcript_025456;Transcript_028007;Transcript_029089;Transcript_031434;Transcript_052856;Transcript_061518;Transcript_083204;Transcript_100197;Transcript_106058;Transcript_112483;Transcript_123520;Transcript_123857;Transcript_137697;Transcript_143265;Transcript_149776;Transcript_188300;Transcript_215401;Transcript_222869;Transcript_226584;Tra…
ko00230	Purine_metabolism	18	4.39538e-56	Transcript_006195;Transcript_012987;Transcript_018744;Transcript_025874;Transcript_026524;Transcript_028183;Transcript_034344;Transcript_046112;Transcript_089776;Transcript_093018;Transcript_099845;Transcript_150478;Transcript_180390;Transcript_183290;Transcript_209045;Transcript_228479;Transcript_229104;Transcript_240346
GO:0004190	F:aspartic-type_endopeptidase_activity_	8	2.33875e-55	Transcript_000434;Transcript_012060;Transcript_037133;Transcript_049116;Transcript_084112;Transcript_130853;Transcript_197515;Transcript_222943
GO:0009536	C:plastid	23	4.45547e-53	Transcript_005986;Transcript_008095;Transcript_013672;Transcript_016721;Transcript_017733;Transcript_025498;Transcript_026708;Transcript_027173;Transcript_032252;Transcript_035046;Transcript_041446;Transcript_044327;Transcript_089463;Transcript_098323;Transcript_153373;Transcript_199469;Transcript_222306;Transcript_222323;Transcript_223819;Transcript_231056;Transcript_231533;Transcript_233389;Tra…
GO:0009793	P:embryo_development_ending_in_seed_dormancy	24	7.67524e-53	Transcript_002021;Transcript_005403;Transcript_008095;Transcript_013672;Transcript_018082;Transcript_020142;Transcript_028007;Transcript_035046;Transcript_043282;Transcript_044327;Transcript_048706;Transcript_061518;Transcript_096084;Transcript_102293;Transcript_149776;Transcript_152324;Transcript_173748;Transcript_178982;Transcript_182614;Transcript_195263;Transcript_216545;Transcript_218059;Tra…
GO:0005777	C:peroxisome	22	6.30286e-52	Transcript_016755;Transcript_018713;Transcript_021257;Transcript_021346;Transcript_021643;Transcript_029830;Transcript_034054;Transcript_036876;Transcript_068167;Transcript_069110;Transcript_079374;Transcript_085323;Transcript_087883;Transcript_120546;Transcript_160618;Transcript_172193;Transcript_200963;Transcript_207612;Transcript_226878;Transcript_235200;Transcript_237775;Transcript_243550
GO:0005615	C:extracellular_space_	21	7.32567e-52	Transcript_002621;Transcript_017329;Transcript_030024;Transcript_032272;Transcript_039672;Transcript_059959;Transcript_077638;Transcript_088203;Transcript_092515;Transcript_095110;Transcript_149814;Transcript_156977;Transcript_157601;Transcript_187190;Transcript_187833;Transcript_201430;Transcript_201752;Transcript_217012;Transcript_219033;Transcript_224193;Transcript_229632
GO:0030246	F:carbohydrate_binding_	24	5.4377e-51	Transcript_006647;Transcript_010174;Transcript_010355;Transcript_029746;Transcript_031866;Transcript_043532;Transcript_045319;Transcript_127606;Transcript_149814;Transcript_152063;Transcript_155913;Transcript_166879;Transcript_170391;Transcript_201020;Transcript_201466;Transcript_217012;Transcript_223483;Transcript_229106;Transcript_231389;Transcript_233702;Transcript_233995;Transcript_235663;Tra…
GO:0006810	P:transport	19	2.53299e-50	Transcript_001031;Transcript_013575;Transcript_015898;Transcript_016377;Transcript_016485;Transcript_026322;Transcript_029712;Transcript_034709;Transcript_042022;Transcript_059959;Transcript_087041;Transcript_157571;Transcript_189533;Transcript_201819;Transcript_217546;Transcript_219033;Transcript_225082;Transcript_233470;Transcript_237958
GO:0006468	P:protein_phosphorylation	9	6.13366e-50	Transcript_000361;Transcript_031338;Transcript_033017;Transcript_100570;Transcript_169722;Transcript_187639;Transcript_188104;Transcript_192590;Transcript_244669
ko04626	Plant-pathogen_interaction	12	1.63153e-48	Transcript_003016;Transcript_016431;Transcript_021643;Transcript_029297;Transcript_069455;Transcript_110097;Transcript_147921;Transcript_159386;Transcript_197004;Transcript_202384;Transcript_220376;Transcript_235878
ko04075	Plant_hormone_signal_transduction	32	2.17784e-48	Transcript_000211;Transcript_007763;Transcript_020405;Transcript_023102;Transcript_024005;Transcript_024208;Transcript_028447;Transcript_033045;Transcript_080059;Transcript_117469;Transcript_147921;Transcript_152339;Transcript_156818;Transcript_157999;Transcript_159449;Transcript_163061;Transcript_168520;Transcript_195377;Transcript_195811;Transcript_196414;Transcript_196770;Transcript_196773;Tra…
GO:0009738	P:abscisic_acid-activated_signaling_pathway	19	7.18723e-48	Transcript_018802;Transcript_024005;Transcript_025370;Transcript_028795;Transcript_034176;Transcript_113548;Transcript_145272;Transcript_152339;Transcript_163061;Transcript_192119;Transcript_195377;Transcript_201137;Transcript_202384;Transcript_220376;Transcript_222613;Transcript_224727;Transcript_229938;Transcript_235878;Transcript_239667
GO:0006633	P:fatty_acid_biosynthetic_process	15	7.34749e-48	Transcript_005449;Transcript_008095;Transcript_009494;Transcript_018164;Transcript_021257;Transcript_027173;Transcript_034041;Transcript_052099;Transcript_095317;Transcript_153867;Transcript_186225;Transcript_203659;Transcript_233389;Transcript_235657;Transcript_242079
ko05010	Alzheimer's_disease	18	1.17164e-47	Transcript_004880;Transcript_005630;Transcript_016203;Transcript_017917;Transcript_018784;Transcript_020239;Transcript_023779;Transcript_026322;Transcript_026611;Transcript_034582;Transcript_038425;Transcript_039672;Transcript_043185;Transcript_058642;Transcript_093530;Transcript_205374;Transcript_230655;Transcript_239152
GO:0009505	C:plant-type_cell_wall	12	1.38074e-46	Transcript_008678;Transcript_010073;Transcript_031041;Transcript_033984;Transcript_045319;Transcript_050536;Transcript_153867;Transcript_169480;Transcript_183278;Transcript_196627;Transcript_202863;Transcript_222950
GO:0005856	C:cytoskeleton	10	1.62801e-46	Transcript_020276;Transcript_028401;Transcript_123266;Transcript_148998;Transcript_169370;Transcript_172827;Transcript_189744;Transcript_226013;Transcript_226379;Transcript_232900
GO:0045454	P:cell_redox_homeostasis	16	1.70325e-46	Transcript_002621;Transcript_006334;Transcript_014604;Transcript_019529;Transcript_020906;Transcript_026795;Transcript_035963;Transcript_037644;Transcript_040960;Transcript_042883;Transcript_065403;Transcript_121426;Transcript_156926;Transcript_223304;Transcript_230068;Transcript_233284
GO:0019843	F:rRNA_binding	20	6.28442e-46	Transcript_007649;Transcript_013664;Transcript_016218;Transcript_017394;Transcript_018528;Transcript_022570;Transcript_026269;Transcript_032203;Transcript_049278;Transcript_081223;Transcript_088864;Transcript_104913;Transcript_110572;Transcript_125114;Transcript_142689;Transcript_157447;Transcript_180586;Transcript_183535;Transcript_184806;Transcript_225057
GO:0031225	C:anchored_component_of_membrane_	12	7.93721e-46	Transcript_000434;Transcript_008678;Transcript_012826;Transcript_020100;Transcript_033984;Transcript_041922;Transcript_079927;Transcript_093665;Transcript_176122;Transcript_183278;Transcript_231204;Transcript_242191
GO:0009733	P:response_to_auxin	14	1.62356e-45	Transcript_018317;Transcript_019743;Transcript_028447;Transcript_038402;Transcript_042145;Transcript_061518;Transcript_149776;Transcript_185779;Transcript_188104;Transcript_195811;Transcript_218673;Transcript_236452;Transcript_238051;Transcript_242340
GO:0006470	P:protein_dephosphorylation	15	1.66766e-45	Transcript_011923;Transcript_013342;Transcript_013781;Transcript_015425;Transcript_016017;Transcript_019538;Transcript_022802;Transcript_024005;Transcript_027279;Transcript_031850;Transcript_059763;Transcript_087103;Transcript_139813;Transcript_225177;Transcript_237889
GO:0016887	F:ATPase_activity	26	2.03578e-45	Transcript_007304;Transcript_009001;Transcript_017225;Transcript_019055;Transcript_020362;Transcript_021257;Transcript_024415;Transcript_027194;Transcript_034709;Transcript_050497;Transcript_087041;Transcript_114532;Transcript_154820;Transcript_163901;Transcript_167806;Transcript_175416;Transcript_186722;Transcript_188668;Transcript_193027;Transcript_195078;Transcript_197170;Transcript_199471;Tra…
ko00240	Pyrimidine_metabolism	11	3.42121e-45	Transcript_006334;Transcript_012987;Transcript_026524;Transcript_027691;Transcript_028183;Transcript_047326;Transcript_093018;Transcript_150478;Transcript_180390;Transcript_183290;Transcript_225771
GO:0007049	P:cell_cycle_	21	6.09422e-45	Transcript_001031;Transcript_008616;Transcript_015116;Transcript_016024;Transcript_016485;Transcript_029712;Transcript_034661;Transcript_044539;Transcript_061518;Transcript_129702;Transcript_143778;Transcript_146959;Transcript_149776;Transcript_160578;Transcript_184234;Transcript_195854;Transcript_195934;Transcript_197413;Transcript_198556;Transcript_201468;Transcript_230984
GO:0043531	F:ADP_binding_	16	8.66097e-45	Transcript_014870;Transcript_018718;Transcript_026681;Transcript_032150;Transcript_089943;Transcript_125015;Transcript_134246;Transcript_159716;Transcript_172479;Transcript_173427;Transcript_191296;Transcript_203157;Transcript_223380;Transcript_228363;Transcript_232040;Transcript_240392
ko00520	Amino_sugar_and_nucleotide_sugar_metabolism	27	8.70175e-45	Transcript_005015;Transcript_008643;Transcript_012883;Transcript_014494;Transcript_014973;Transcript_015198;Transcript_016780;Transcript_025190;Transcript_025940;Transcript_040039;Transcript_050536;Transcript_074927;Transcript_077638;Transcript_096837;Transcript_144405;Transcript_151634;Transcript_155240;Transcript_156289;Transcript_169480;Transcript_180358;Transcript_190643;Transcript_218648;Tra…
GO:0009534	C:chloroplast_thylakoid	10	2.7073e-44	Transcript_005179;Transcript_018416;Transcript_024497;Transcript_028942;Transcript_044737;Transcript_047691;Transcript_051101;Transcript_101984;Transcript_155928;Transcript_187753
GO:0051287	F:NAD_binding	9	1.00729e-43	Transcript_009494;Transcript_016780;Transcript_021635;Transcript_035046;Transcript_149539;Transcript_156988;Transcript_202366;Transcript_236323;Transcript_241886
GO:0007067	P:mitotic_nuclear_division	13	1.25058e-43	Transcript_000211;Transcript_007763;Transcript_018082;Transcript_027057;Transcript_029875;Transcript_031434;Transcript_033017;Transcript_033208;Transcript_137697;Transcript_173351;Transcript_189533;Transcript_208085;Transcript_225636
GO:0008380	P:RNA_splicing	26	1.30766e-43	Transcript_006795;Transcript_026515;Transcript_034582;Transcript_041888;Transcript_048932;Transcript_051286;Transcript_066301;Transcript_097610;Transcript_131597;Transcript_149080;Transcript_149420;Transcript_153181;Transcript_158530;Transcript_159255;Transcript_167985;Transcript_175896;Transcript_187789;Transcript_193507;Transcript_195453;Transcript_208090;Transcript_208937;Transcript_220063;Tra…
GO:0005215	F:transporter_activity	17	1.90408e-43	Transcript_006721;Transcript_009070;Transcript_015003;Transcript_019055;Transcript_024415;Transcript_026942;Transcript_043294;Transcript_106824;Transcript_156394;Transcript_169520;Transcript_191446;Transcript_193027;Transcript_195078;Transcript_197413;Transcript_200150;Transcript_203070;Transcript_241902
GO:0009408	P:response_to_heat	18	3.3835e-43	Transcript_003016;Transcript_006675;Transcript_019684;Transcript_020324;Transcript_025821;Transcript_026193;Transcript_026424;Transcript_136358;Transcript_139661;Transcript_169635;Transcript_185552;Transcript_211478;Transcript_215297;Transcript_222677;Transcript_228895;Transcript_232525;Transcript_235302;Transcript_242959
ko05012	Parkinson's_disease	25	3.41505e-43	Transcript_004880;Transcript_005630;Transcript_008597;Transcript_014759;Transcript_017917;Transcript_018784;Transcript_019608;Transcript_020239;Transcript_023779;Transcript_026611;Transcript_038425;Transcript_043185;Transcript_045165;Transcript_058642;Transcript_093530;Transcript_123857;Transcript_152859;Transcript_169520;Transcript_205374;Transcript_219022;Transcript_230060;Transcript_230655;Tra…
GO:0007165	P:signal_transduction	11	5.14099e-43	Transcript_012966;Transcript_015977;Transcript_023274;Transcript_027836;Transcript_030740;Transcript_043875;Transcript_093206;Transcript_096671;Transcript_128635;Transcript_154489;Transcript_236384
GO:0050832	P:defense_response_to_fungus	16	8.90316e-43	Transcript_023102;Transcript_027836;Transcript_033045;Transcript_041692;Transcript_061772;Transcript_082888;Transcript_108837;Transcript_162578;Transcript_167228;Transcript_181429;Transcript_190763;Transcript_198878;Transcript_202542;Transcript_220063;Transcript_238051;Transcript_243354
ko04932	Non-alcoholic_fatty_liver_disease_(NAFLD)	14	2.20576e-42	Transcript_004880;Transcript_005630;Transcript_017917;Transcript_018784;Transcript_020239;Transcript_023779;Transcript_034582;Transcript_038425;Transcript_058642;Transcript_093530;Transcript_113548;Transcript_209739;Transcript_230655;Transcript_239152
GO:0005681	C:spliceosomal_complex	17	3.3421e-42	Transcript_006849;Transcript_028952;Transcript_033816;Transcript_041888;Transcript_043873;Transcript_048932;Transcript_097610;Transcript_149080;Transcript_159255;Transcript_167985;Transcript_175896;Transcript_191863;Transcript_193507;Transcript_195453;Transcript_208090;Transcript_212567;Transcript_240682
GO:0000398	P:mRNA_splicing,_via_spliceosome	9	3.8523e-42	Transcript_042932;Transcript_144160;Transcript_149420;Transcript_159255;Transcript_165598;Transcript_188701;Transcript_191819;Transcript_212567;Transcript_240682
GO:0010008	C:endosome_membrane_	8	4.85454e-42	Transcript_021558;Transcript_041422;Transcript_088132;Transcript_089868;Transcript_169723;Transcript_222019;Transcript_234135;Transcript_240304
ko03015	mRNA_surveillance_pathway	13	8.21695e-41	Transcript_011878;Transcript_013342;Transcript_014461;Transcript_015425;Transcript_023274;Transcript_025855;Transcript_042932;Transcript_048932;Transcript_088598;Transcript_128635;Transcript_222390;Transcript_222440;Transcript_230984
GO:0015979	P:photosynthesis	12	1.246e-40	Transcript_015584;Transcript_015999;Transcript_024497;Transcript_026572;Transcript_042062;Transcript_079322;Transcript_083010;Transcript_101984;Transcript_223819;Transcript_229399;Transcript_229806;Transcript_240051
ko00010	Glycolysis_/_Gluconeogenesis	14	4.43692e-40	Transcript_014114;Transcript_016946;Transcript_020906;Transcript_027666;Transcript_037155;Transcript_038026;Transcript_043532;Transcript_089776;Transcript_121426;Transcript_150940;Transcript_213712;Transcript_229106;Transcript_230358;Transcript_234175
GO:0016757	F:transferase_activity,_transferring_glycosyl_groups_	10	4.86819e-40	Transcript_004851;Transcript_021186;Transcript_035627;Transcript_046845;Transcript_051590;Transcript_076237;Transcript_087796;Transcript_170115;Transcript_232252;Transcript_236296
ko03018	RNA_degradation	19	4.9135e-40	Transcript_004649;Transcript_006675;Transcript_009730;Transcript_013734;Transcript_016657;Transcript_026221;Transcript_027729;Transcript_032972;Transcript_038026;Transcript_044789;Transcript_048202;Transcript_183290;Transcript_191361;Transcript_212567;Transcript_213712;Transcript_214662;Transcript_224027;Transcript_237558;Transcript_241730
GO:0009611	P:response_to_wounding	21	6.10339e-40	Transcript_007694;Transcript_014461;Transcript_016431;Transcript_020324;Transcript_023102;Transcript_028447;Transcript_031663;Transcript_033045;Transcript_038206;Transcript_042062;Transcript_042145;Transcript_042248;Transcript_044528;Transcript_090430;Transcript_159449;Transcript_176865;Transcript_181429;Transcript_193866;Transcript_202542;Transcript_230274;Transcript_242340
ko05203	Viral_carcinogenesis	17	6.87592e-40	Transcript_001691;Transcript_005845;Transcript_008616;Transcript_037500;Transcript_044690;Transcript_080670;Transcript_089776;Transcript_098438;Transcript_113548;Transcript_137697;Transcript_152118;Transcript_173351;Transcript_186849;Transcript_195934;Transcript_201468;Transcript_214254;Transcript_226800
GO:0006096	P:glycolytic_process	15	8.23513e-40	Transcript_007938;Transcript_014114;Transcript_016946;Transcript_027666;Transcript_029327;Transcript_038026;Transcript_042582;Transcript_062774;Transcript_089776;Transcript_148826;Transcript_148905;Transcript_150940;Transcript_203310;Transcript_213712;Transcript_230358
GO:0009055	F:electron_carrier_activity	12	1.01135e-39	Transcript_009053;Transcript_009517;Transcript_012826;Transcript_017917;Transcript_019529;Transcript_030330;Transcript_035963;Transcript_038425;Transcript_230068;Transcript_237552;Transcript_238422;Transcript_239152
GO:0009873	P:ethylene-activated_signaling_pathway	20	3.09405e-39	Transcript_002675;Transcript_020405;Transcript_025995;Transcript_028007;Transcript_042206;Transcript_061518;Transcript_096084;Transcript_104433;Transcript_145272;Transcript_149776;Transcript_156818;Transcript_161009;Transcript_193866;Transcript_196770;Transcript_221802;Transcript_222544;Transcript_226660;Transcript_227255;Transcript_227686;Transcript_240304
GO:0031969	C:chloroplast_membrane_	15	3.42953e-39	Transcript_007414;Transcript_009381;Transcript_013672;Transcript_015003;Transcript_016721;Transcript_042298;Transcript_044327;Transcript_153952;Transcript_155268;Transcript_170559;Transcript_172794;Transcript_199362;Transcript_203659;Transcript_230685;Transcript_235192
GO:0016042	P:lipid_catabolic_process	15	4.91182e-39	Transcript_021881;Transcript_041988;Transcript_042206;Transcript_055067;Transcript_070780;Transcript_108555;Transcript_167693;Transcript_176855;Transcript_187315;Transcript_188434;Transcript_195839;Transcript_226191;Transcript_226265;Transcript_226282;Transcript_233880
GO:0006511	P:ubiquitin-dependent_protein_catabolic_process	21	5.10534e-39	Transcript_008163;Transcript_008597;Transcript_009825;Transcript_014759;Transcript_022485;Transcript_025456;Transcript_028007;Transcript_029089;Transcript_048069;Transcript_052856;Transcript_088907;Transcript_096377;Transcript_100197;Transcript_123520;Transcript_123857;Transcript_156818;Transcript_209986;Transcript_213671;Transcript_215401;Transcript_222527;Transcript_243787
GO:0005507	F:copper_ion_binding	24	9.2293e-39	Transcript_005630;Transcript_006390;Transcript_006675;Transcript_006886;Transcript_007347;Transcript_009053;Transcript_018514;Transcript_025995;Transcript_032272;Transcript_033984;Transcript_034831;Transcript_035581;Transcript_046112;Transcript_106270;Transcript_121426;Transcript_141694;Transcript_158955;Transcript_177859;Transcript_183278;Transcript_197557;Transcript_222613;Transcript_224193;Tra…
GO:0004722	F:protein_serine/threonine_phosphatase_activity	14	2.33867e-38	Transcript_011923;Transcript_013342;Transcript_013781;Transcript_016017;Transcript_019538;Transcript_022802;Transcript_024005;Transcript_031850;Transcript_035318;Transcript_059763;Transcript_087103;Transcript_204604;Transcript_225177;Transcript_237889
GO:0050660	F:flavin_adenine_dinucleotide_binding	16	2.62652e-38	Transcript_006334;Transcript_020906;Transcript_024129;Transcript_026795;Transcript_028047;Transcript_042960;Transcript_047156;Transcript_121426;Transcript_133357;Transcript_188188;Transcript_201752;Transcript_204893;Transcript_224656;Transcript_232921;Transcript_235200;Transcript_237552
GO:0006364	P:rRNA_processing	14	4.45927e-38	Transcript_003601;Transcript_013970;Transcript_020362;Transcript_027323;Transcript_032315;Transcript_079296;Transcript_129702;Transcript_157447;Transcript_167806;Transcript_205205;Transcript_227688;Transcript_229956;Transcript_231660;Transcript_239729
GO:0009524	C:phragmoplast	10	5.27128e-38	Transcript_009001;Transcript_048706;Transcript_061518;Transcript_149776;Transcript_154200;Transcript_169370;Transcript_175416;Transcript_189744;Transcript_199471;Transcript_227602
GO:0009579	C:thylakoid	17	6.07545e-38	Transcript_005179;Transcript_006390;Transcript_007448;Transcript_014604;Transcript_018416;Transcript_024497;Transcript_028942;Transcript_044737;Transcript_047691;Transcript_079322;Transcript_101984;Transcript_155928;Transcript_166804;Transcript_219776;Transcript_226817;Transcript_231533;Transcript_234806
GO:0022626	C:cytosolic_ribosome	23	9.17083e-38	Transcript_006390;Transcript_006675;Transcript_007473;Transcript_009505;Transcript_018304;Transcript_026269;Transcript_031909;Transcript_039434;Transcript_049892;Transcript_050081;Transcript_128594;Transcript_131551;Transcript_152161;Transcript_162418;Transcript_180586;Transcript_181757;Transcript_195577;Transcript_197887;Transcript_200901;Transcript_210757;Transcript_212812;Transcript_225057;Tra…
GO:0009705	C:plant-type_vacuole_membrane	6	1.29162e-37	Transcript_017321;Transcript_042300;Transcript_062728;Transcript_100187;Transcript_109378;Transcript_199402
GO:0030170	F:pyridoxal_phosphate_binding	12	1.51383e-37	Transcript_010828;Transcript_034831;Transcript_041676;Transcript_042372;Transcript_055405;Transcript_077725;Transcript_135572;Transcript_157858;Transcript_191395;Transcript_209738;Transcript_243351;Transcript_243550
GO:0008289	F:lipid_binding_	15	2.36092e-37	Transcript_001031;Transcript_016485;Transcript_026942;Transcript_029492;Transcript_029712;Transcript_053565;Transcript_087883;Transcript_101433;Transcript_150018;Transcript_194928;Transcript_197413;Transcript_203070;Transcript_217546;Transcript_229632;Transcript_233419
GO:0003755	F:peptidyl-prolyl_cis-trans_isomerase_activity	2	2.89696e-37	Transcript_108778;Transcript_175511
ko04145	Phagosome	12	3.13295e-37	Transcript_009757;Transcript_029746;Transcript_045319;Transcript_080670;Transcript_088132;Transcript_103380;Transcript_113548;Transcript_123266;Transcript_149814;Transcript_168752;Transcript_222019;Transcript_234135
ko00620	Pyruvate_metabolism	10	4.41898e-37	Transcript_007900;Transcript_017810;Transcript_020906;Transcript_089776;Transcript_121426;Transcript_230358;Transcript_233389;Transcript_234175;Transcript_236388;Transcript_236821
GO:0005759	C:mitochondrial_matrix_	18	8.7254e-37	Transcript_006675;Transcript_006795;Transcript_007900;Transcript_007938;Transcript_012779;Transcript_016540;Transcript_016624;Transcript_021346;Transcript_022952;Transcript_033844;Transcript_121426;Transcript_186722;Transcript_187190;Transcript_223630;Transcript_230358;Transcript_234175;Transcript_235200;Transcript_237552
GO:0006970	P:response_to_osmotic_stress	7	1.42373e-36	Transcript_023779;Transcript_090430;Transcript_155240;Transcript_179976;Transcript_192119;Transcript_227686;Transcript_229385
GO:0004252	F:serine-type_endopeptidase_activity	16	4.73208e-36	Transcript_047691;Transcript_092515;Transcript_153193;Transcript_157601;Transcript_158348;Transcript_158550;Transcript_166298;Transcript_172827;Transcript_172934;Transcript_181757;Transcript_182863;Transcript_188304;Transcript_195425;Transcript_197673;Transcript_205619;Transcript_207739
GO:0009626	P:plant-type_hypersensitive_response	11	5.49144e-36	Transcript_026681;Transcript_027731;Transcript_032150;Transcript_042206;Transcript_044014;Transcript_089943;Transcript_172479;Transcript_173427;Transcript_202685;Transcript_232040;Transcript_240304
GO:0000502	C:proteasome_complex	10	5.59766e-36	Transcript_002519;Transcript_009825;Transcript_018525;Transcript_022485;Transcript_031618;Transcript_078776;Transcript_131551;Transcript_171325;Transcript_188712;Transcript_226114
GO:0035556	P:intracellular_signal_transduction	8	1.00085e-35	Transcript_027279;Transcript_100570;Transcript_169722;Transcript_201137;Transcript_202384;Transcript_220376;Transcript_235878;Transcript_244669
GO:0043161	P:proteasome-mediated_ubiquitin-dependent_protein_catabolic_process	16	1.3656e-35	Transcript_002519;Transcript_014881;Transcript_018525;Transcript_021735;Transcript_087040;Transcript_090430;Transcript_122153;Transcript_122229;Transcript_122859;Transcript_131551;Transcript_165796;Transcript_191303;Transcript_222527;Transcript_226114;Transcript_227452;Transcript_233151
GO:0003743	F:translation_initiation_factor_activity	19	1.56764e-35	Transcript_009203;Transcript_012262;Transcript_016560;Transcript_030122;Transcript_031078;Transcript_031558;Transcript_041538;Transcript_042437;Transcript_043594;Transcript_136358;Transcript_148931;Transcript_150246;Transcript_154736;Transcript_215917;Transcript_224218;Transcript_224747;Transcript_234158;Transcript_235250;Transcript_243161
ko04151	PI3K-Akt_signaling_pathway	9	4.56224e-35	Transcript_003016;Transcript_015425;Transcript_023274;Transcript_110097;Transcript_113548;Transcript_128635;Transcript_186849;Transcript_221971;Transcript_226800
GO:0005516	F:calmodulin_binding	11	6.547e-35	Transcript_008176;Transcript_010355;Transcript_103275;Transcript_152063;Transcript_199370;Transcript_201137;Transcript_202384;Transcript_220376;Transcript_233702;Transcript_235878;Transcript_241087
GO:0046658	C:anchored_component_of_plasma_membrane	8	9.0192e-35	Transcript_000434;Transcript_008678;Transcript_012826;Transcript_022530;Transcript_033984;Transcript_176122;Transcript_183278;Transcript_242191
GO:0009555	P:pollen_development	15	9.57434e-35	Transcript_009001;Transcript_035046;Transcript_036091;Transcript_057799;Transcript_061772;Transcript_088132;Transcript_141694;Transcript_153953;Transcript_155818;Transcript_188668;Transcript_196412;Transcript_196773;Transcript_197038;Transcript_220227;Transcript_222019
ko00564	Glycerophospholipid_metabolism	10	1.96221e-34	Transcript_013672;Transcript_026222;Transcript_026934;Transcript_036091;Transcript_059666;Transcript_150805;Transcript_223736;Transcript_226282;Transcript_235785;Transcript_241886
GO:0016607	C:nuclear_speck	8	5.28137e-34	Transcript_032972;Transcript_033017;Transcript_034660;Transcript_051286;Transcript_097610;Transcript_167985;Transcript_195453;Transcript_235950
GO:0016301	F:kinase_activity	11	5.60261e-34	Transcript_014600;Transcript_042217;Transcript_100502;Transcript_107140;Transcript_145272;Transcript_145917;Transcript_172794;Transcript_187797;Transcript_192556;Transcript_221915;Transcript_244669
GO:0006897	P:endocytosis	8	1.56091e-33	Transcript_022145;Transcript_027502;Transcript_033018;Transcript_041385;Transcript_043468;Transcript_101433;Transcript_178285;Transcript_236530
GO:0048364	P:root_development	10	4.79996e-33	Transcript_020142;Transcript_092175;Transcript_109577;Transcript_152324;Transcript_165034;Transcript_180831;Transcript_182308;Transcript_201458;Transcript_209443;Transcript_224333
GO:0004497	F:monooxygenase_activity	11	4.94999e-33	Transcript_020455;Transcript_029457;Transcript_042298;Transcript_043681;Transcript_044496;Transcript_090971;Transcript_160352;Transcript_212035;Transcript_225775;Transcript_226764;Transcript_226799
ko03050	Proteasome	12	1.76272e-32	Transcript_002519;Transcript_018525;Transcript_031618;Transcript_057518;Transcript_078776;Transcript_131551;Transcript_171325;Transcript_188712;Transcript_191303;Transcript_227452;Transcript_234735;Transcript_241708
GO:0007264	P:small_GTPase_mediated_signal_transduction	10	2.00843e-32	Transcript_016567;Transcript_017347;Transcript_018712;Transcript_023404;Transcript_027057;Transcript_080040;Transcript_113548;Transcript_173748;Transcript_196706;Transcript_225636
GO:0045892	P:negative_regulation_of_transcription,_DNA-templated	15	2.36814e-32	Transcript_025821;Transcript_028211;Transcript_042062;Transcript_042145;Transcript_101332;Transcript_153091;Transcript_169635;Transcript_192644;Transcript_193507;Transcript_198631;Transcript_208090;Transcript_212191;Transcript_229810;Transcript_235625;Transcript_238051
ko04071	Sphingolipid_signaling_pathway	5	1.08189e-31	Transcript_015425;Transcript_023274;Transcript_042796;Transcript_113548;Transcript_128635
GO:0022625	C:cytosolic_large_ribosomal_subunit	18	1.39967e-31	Transcript_007059;Transcript_007473;Transcript_007868;Transcript_009505;Transcript_013258;Transcript_017396;Transcript_026774;Transcript_044835;Transcript_048069;Transcript_049892;Transcript_050081;Transcript_128594;Transcript_162418;Transcript_194845;Transcript_200901;Transcript_210757;Transcript_212812;Transcript_225057
GO:0007623	P:circadian_rhythm	3	1.63862e-31	Transcript_024208;Transcript_181018;Transcript_199971
ko04110	Cell_cycle	22	2.56093e-31	Transcript_008616;Transcript_015798;Transcript_018082;Transcript_028007;Transcript_031434;Transcript_036736;Transcript_041712;Transcript_052856;Transcript_061518;Transcript_083204;Transcript_098438;Transcript_137697;Transcript_142487;Transcript_145917;Transcript_149776;Transcript_173351;Transcript_186849;Transcript_189362;Transcript_195934;Transcript_201468;Transcript_208085;Transcript_226800
GO:0042802	F:identical_protein_binding	18	2.78781e-31	Transcript_000361;Transcript_006334;Transcript_015798;Transcript_026452;Transcript_027814;Transcript_034054;Transcript_034660;Transcript_042077;Transcript_101984;Transcript_142487;Transcript_162281;Transcript_199186;Transcript_200038;Transcript_221914;Transcript_227776;Transcript_229385;Transcript_234175;Transcript_242079
ko04114	Oocyte_meiosis	14	4.79443e-31	Transcript_013342;Transcript_015425;Transcript_018082;Transcript_023274;Transcript_028007;Transcript_031434;Transcript_052856;Transcript_061518;Transcript_083204;Transcript_128635;Transcript_137697;Transcript_149776;Transcript_186849;Transcript_226800
GO:0010200	P:response_to_chitin	4	5.47076e-31	Transcript_025821;Transcript_042062;Transcript_169635;Transcript_203246
ko04152	AMPK_signaling_pathway	14	8.93231e-31	Transcript_000223;Transcript_002675;Transcript_008616;Transcript_015425;Transcript_023274;Transcript_038026;Transcript_128635;Transcript_173351;Transcript_195934;Transcript_201468;Transcript_209739;Transcript_213712;Transcript_221971;Transcript_242079
GO:0016705	F:oxidoreductase_activity,_acting_on_paired_donors,_with_incorporation_or_reduction_of_molecular_oxygen	12	1.18551e-30	Transcript_020455;Transcript_029457;Transcript_042298;Transcript_043681;Transcript_044496;Transcript_090971;Transcript_160352;Transcript_171704;Transcript_212035;Transcript_225775;Transcript_226764;Transcript_226799
GO:0004386	F:helicase_activity	16	1.74829e-30	Transcript_001691;Transcript_014461;Transcript_023610;Transcript_029924;Transcript_036952;Transcript_043594;Transcript_093342;Transcript_139660;Transcript_154736;Transcript_165031;Transcript_206170;Transcript_210991;Transcript_222148;Transcript_224218;Transcript_226076;Transcript_239497
GO:0016032	P:viral_process	8	2.09897e-30	Transcript_026774;Transcript_028007;Transcript_043594;Transcript_046112;Transcript_186722;Transcript_188104;Transcript_227686;Transcript_235625
ko05166	HTLV-I_infection	16	3.52819e-30	Transcript_015798;Transcript_019608;Transcript_029746;Transcript_031434;Transcript_044690;Transcript_044881;Transcript_045165;Transcript_045319;Transcript_098438;Transcript_137697;Transcript_142487;Transcript_145917;Transcript_149814;Transcript_169520;Transcript_214254;Transcript_233863
GO:0016311	P:dephosphorylation	10	4.11565e-30	Transcript_008396;Transcript_010467;Transcript_019778;Transcript_028942;Transcript_035318;Transcript_120546;Transcript_149112;Transcript_172102;Transcript_204604;Transcript_223426
GO:0009813	P:flavonoid_biosynthetic_process	5	4.35508e-30	Transcript_017321;Transcript_026411;Transcript_091774;Transcript_144277;Transcript_232480
GO:0030163	P:protein_catabolic_process	4	4.55447e-30	Transcript_012060;Transcript_171325;Transcript_188712;Transcript_225384
GO:0051539	F:4_iron,_4_sulfur_cluster_binding	12	4.87624e-30	Transcript_004880;Transcript_015584;Transcript_018331;Transcript_021247;Transcript_023212;Transcript_049632;Transcript_071931;Transcript_083010;Transcript_090030;Transcript_090284;Transcript_143674;Transcript_238422
ko04142	Lysosome	9	6.19796e-30	Transcript_018757;Transcript_033908;Transcript_041445;Transcript_080670;Transcript_156026;Transcript_168752;Transcript_201430;Transcript_225082;Transcript_235663
GO:0004519	F:endonuclease_activity	8	6.30236e-30	Transcript_049116;Transcript_084112;Transcript_130853;Transcript_158012;Transcript_197515;Transcript_202654;Transcript_227802;Transcript_240360
ko03008	Ribosome_biogenesis_in_eukaryotes	16	1.88281e-29	Transcript_003601;Transcript_003602;Transcript_006150;Transcript_017225;Transcript_041560;Transcript_041888;Transcript_079296;Transcript_086503;Transcript_104913;Transcript_129702;Transcript_157447;Transcript_167806;Transcript_205205;Transcript_205336;Transcript_229956;Transcript_239729
ko00480	Glutathione_metabolism	3	1.94281e-29	Transcript_149539;Transcript_209211;Transcript_232471
ko01212	Fatty_acid_metabolism	13	3.61426e-29	Transcript_008095;Transcript_016755;Transcript_026760;Transcript_027173;Transcript_079374;Transcript_095317;Transcript_160618;Transcript_202366;Transcript_223630;Transcript_233389;Transcript_233892;Transcript_237552;Transcript_242079
GO:0006417	P:regulation_of_translation	10	4.7509e-29	Transcript_006236;Transcript_009704;Transcript_016483;Transcript_136358;Transcript_155268;Transcript_158530;Transcript_223074;Transcript_225044;Transcript_234158;Transcript_243161
ko05231	Choline_metabolism_in_cancer	5	7.58903e-29	Transcript_042004;Transcript_113548;Transcript_150805;Transcript_157618;Transcript_185415
GO:0006260	P:DNA_replication	9	1.01956e-28	Transcript_026221;Transcript_036736;Transcript_047736;Transcript_090284;Transcript_144160;Transcript_155807;Transcript_189362;Transcript_196318;Transcript_236505
ko00260	Glycine,_serine_and_threonine_metabolism	13	1.9167e-28	Transcript_014114;Transcript_016946;Transcript_020906;Transcript_035046;Transcript_041676;Transcript_121426;Transcript_150940;Transcript_157295;Transcript_209738;Transcript_214102;Transcript_222613;Transcript_226878;Transcript_243550
GO:0006486	P:protein_glycosylation	7	2.12379e-28	Transcript_001971;Transcript_004982;Transcript_021186;Transcript_034534;Transcript_180845;Transcript_227688;Transcript_229590
GO:0008168	F:methyltransferase_activity	14	3.2422e-28	Transcript_009517;Transcript_013899;Transcript_016005;Transcript_024085;Transcript_036091;Transcript_095937;Transcript_149653;Transcript_187753;Transcript_200038;Transcript_213337;Transcript_219802;Transcript_224265;Transcript_231963;Transcript_232035
GO:0015293	F:symporter_activity	11	7.37963e-28	Transcript_004778;Transcript_008298;Transcript_041292;Transcript_085884;Transcript_097145;Transcript_097999;Transcript_139829;Transcript_193304;Transcript_229566;Transcript_231533;Transcript_233903
ko00020	Citrate_cycle_(TCA_cycle)	10	8.19999e-28	Transcript_007900;Transcript_016540;Transcript_017810;Transcript_020906;Transcript_023212;Transcript_031909;Transcript_121426;Transcript_203816;Transcript_230358;Transcript_233806
GO:0070469	C:respiratory_chain	9	8.83809e-28	Transcript_004880;Transcript_005630;Transcript_016315;Transcript_017917;Transcript_020239;Transcript_036083;Transcript_152859;Transcript_219022;Transcript_236234
ko00970	Aminoacyl-tRNA_biosynthesis	8	9.21679e-28	Transcript_027485;Transcript_032436;Transcript_043282;Transcript_178982;Transcript_192279;Transcript_206168;Transcript_238069;Transcript_240340
ko05200	Pathways_in_cancer	7	1.20221e-27	Transcript_003016;Transcript_083204;Transcript_098438;Transcript_110097;Transcript_113548;Transcript_172646;Transcript_226584
GO:0050661	F:NADP_binding	8	1.32939e-27	Transcript_010592;Transcript_021285;Transcript_026795;Transcript_045644;Transcript_188188;Transcript_202366;Transcript_204443;Transcript_232471
GO:0061630	F:ubiquitin_protein_ligase_activity	8	2.4985e-27	Transcript_008597;Transcript_014759;Transcript_083204;Transcript_123520;Transcript_123857;Transcript_209986;Transcript_215401;Transcript_243787
GO:0040008	P:regulation_of_growth	12	3.53214e-27	Transcript_009286;Transcript_011266;Transcript_019060;Transcript_022653;Transcript_082825;Transcript_154573;Transcript_172934;Transcript_186849;Transcript_196414;Transcript_209211;Transcript_222148;Transcript_243720
ko05110	Vibrio_cholerae_infection	5	4.0447e-27	Transcript_009757;Transcript_080670;Transcript_123266;Transcript_168752;Transcript_218015
GO:0044212	F:transcription_regulatory_region_DNA_binding	4	4.73952e-27	Transcript_044529;Transcript_183955;Transcript_184165;Transcript_222544
GO:0003964	F:RNA-directed_DNA_polymerase_activity	7	5.07964e-27	Transcript_016415;Transcript_049116;Transcript_084112;Transcript_130853;Transcript_158012;Transcript_197515;Transcript_222943
GO:0050662	F:coenzyme_binding	7	7.29608e-27	Transcript_025190;Transcript_025940;Transcript_131936;Transcript_144405;Transcript_153953;Transcript_233175;Transcript_233387
GO:0009826	P:unidimensional_cell_growth	5	8.34194e-27	Transcript_018082;Transcript_036091;Transcript_074557;Transcript_139328;Transcript_234088
GO:0022627	C:cytosolic_small_ribosomal_subunit_	12	1.00428e-26	Transcript_018304;Transcript_039229;Transcript_039434;Transcript_110572;Transcript_125114;Transcript_180586;Transcript_195577;Transcript_197887;Transcript_212902;Transcript_222784;Transcript_232915;Transcript_242229
ko05168	Herpes_simplex_infection	13	1.19867e-26	Transcript_002021;Transcript_006795;Transcript_013342;Transcript_028007;Transcript_040271;Transcript_052856;Transcript_054599;Transcript_061518;Transcript_098438;Transcript_149776;Transcript_214254;Transcript_223074;Transcript_232617
ko04721	Synaptic_vesicle_cycle	8	2.14301e-26	Transcript_009757;Transcript_023676;Transcript_027502;Transcript_043468;Transcript_080670;Transcript_101433;Transcript_168752;Transcript_234643
ko04146	Peroxisome	19	2.74564e-26	Transcript_016624;Transcript_016755;Transcript_018317;Transcript_018717;Transcript_021257;Transcript_021346;Transcript_026760;Transcript_034054;Transcript_036876;Transcript_044737;Transcript_058641;Transcript_067992;Transcript_087883;Transcript_120546;Transcript_160618;Transcript_162000;Transcript_207612;Transcript_226878;Transcript_233892
GO:0012505	C:endomembrane_system	6	3.05808e-26	Transcript_002621;Transcript_012422;Transcript_027691;Transcript_149814;Transcript_193394;Transcript_234643
ko00940	Phenylpropanoid_biosynthesis	7	3.12796e-26	Transcript_001865;Transcript_011264;Transcript_035390;Transcript_157859;Transcript_196627;Transcript_233010;Transcript_235608
ko00051	Fructose_and_mannose_metabolism	6	4.00052e-26	Transcript_000223;Transcript_027666;Transcript_038026;Transcript_213712;Transcript_224440;Transcript_230751
GO:0015991	P:ATP_hydrolysis_coupled_proton_transport	9	4.16217e-26	Transcript_004585;Transcript_009757;Transcript_023555;Transcript_080670;Transcript_168752;Transcript_201255;Transcript_230521;Transcript_235352;Transcript_239369
ko04910	Insulin_signaling_pathway	3	4.4009e-26	Transcript_013342;Transcript_221971;Transcript_242079
GO:0022857	F:transmembrane_transporter_activity	3	6.37973e-26	Transcript_017321;Transcript_046092;Transcript_059958
ko04931	Insulin_resistance	2	8.31084e-26	Transcript_013342;Transcript_024005
GO:0006099	P:tricarboxylic_acid_cycle	12	8.32176e-26	Transcript_007900;Transcript_016540;Transcript_017810;Transcript_023212;Transcript_031909;Transcript_089463;Transcript_098323;Transcript_156988;Transcript_203816;Transcript_222306;Transcript_233806;Transcript_236821
GO:0009753	P:response_to_jasmonic_acid	16	9.20845e-26	Transcript_007304;Transcript_023102;Transcript_028447;Transcript_033045;Transcript_061518;Transcript_096297;Transcript_149776;Transcript_159449;Transcript_181429;Transcript_185779;Transcript_196773;Transcript_202542;Transcript_217546;Transcript_224109;Transcript_230274;Transcript_238051
ko05152	Tuberculosis	7	9.38883e-26	Transcript_006675;Transcript_027729;Transcript_048202;Transcript_080670;Transcript_098438;Transcript_168752;Transcript_199469
GO:0005635	C:nuclear_envelope	10	1.10771e-25	Transcript_002621;Transcript_014649;Transcript_018940;Transcript_025598;Transcript_149508;Transcript_158395;Transcript_232525;Transcript_235418;Transcript_241108;Transcript_243146
ko05206	MicroRNAs_in_cancer	6	1.1781e-25	Transcript_031605;Transcript_098438;Transcript_101332;Transcript_200150;Transcript_221971;Transcript_222312
GO:0009735	P:response_to_cytokinin	11	1.38989e-25	Transcript_000211;Transcript_007763;Transcript_014604;Transcript_018416;Transcript_018511;Transcript_020313;Transcript_024208;Transcript_025874;Transcript_026269;Transcript_117469;Transcript_166804
GO:0006629	P:lipid_metabolic_process	14	1.48081e-25	Transcript_005986;Transcript_011264;Transcript_018502;Transcript_022530;Transcript_024035;Transcript_034054;Transcript_035390;Transcript_042206;Transcript_059666;Transcript_139231;Transcript_149716;Transcript_157859;Transcript_166298;Transcript_175075
GO:0006887	P:exocytosis	5	1.54814e-25	Transcript_018082;Transcript_018740;Transcript_071779;Transcript_189744;Transcript_234643
GO:0009706	C:chloroplast_inner_membrane	8	1.73421e-25	Transcript_004155;Transcript_013575;Transcript_032252;Transcript_045640;Transcript_078260;Transcript_171704;Transcript_221914;Transcript_222323
ko04666	Fc_gamma_R-mediated_phagocytosis	7	1.75479e-25	Transcript_019534;Transcript_042004;Transcript_113548;Transcript_157618;Transcript_185415;Transcript_197714;Transcript_239448
GO:0031965	C:nuclear_membrane_	3	1.94977e-25	Transcript_026322;Transcript_118749;Transcript_158395
ko00040	Pentose_and_glucuronate_interconversions	5	2.23677e-25	Transcript_067062;Transcript_069670;Transcript_108985;Transcript_142152;Transcript_234175
ko04024	cAMP_signaling_pathway	4	2.53322e-25	Transcript_013342;Transcript_093127;Transcript_098438;Transcript_113548
GO:0006811	P:ion_transport	2	2.54637e-25	Transcript_102614;Transcript_189321
GO:0015074	P:DNA_integration	8	3.51688e-25	Transcript_016415;Transcript_049116;Transcript_084112;Transcript_130853;Transcript_158012;Transcript_176415;Transcript_197515;Transcript_222943
GO:0005788	C:endoplasmic_reticulum_lumen	7	3.58729e-25	Transcript_002621;Transcript_029746;Transcript_040960;Transcript_149814;Transcript_160512;Transcript_181616;Transcript_235388
ko00561	Glycerolipid_metabolism	7	3.58729e-25	Transcript_013672;Transcript_016721;Transcript_025940;Transcript_226282;Transcript_234175;Transcript_238199;Transcript_239329
GO:0052689	F:carboxylic_ester_hydrolase_activity	7	5.13465e-25	Transcript_044198;Transcript_077461;Transcript_158885;Transcript_166474;Transcript_192672;Transcript_223096;Transcript_223799
ko04810	Regulation_of_actin_cytoskeleton	12	6.25378e-25	Transcript_013342;Transcript_019534;Transcript_042004;Transcript_088132;Transcript_113548;Transcript_123266;Transcript_157618;Transcript_185415;Transcript_197714;Transcript_222019;Transcript_234135;Transcript_239448
GO:0043231	C:intracellular_membrane-bounded_organelle_	8	7.15385e-25	Transcript_015116;Transcript_021257;Transcript_036736;Transcript_044539;Transcript_156977;Transcript_176865;Transcript_219033;Transcript_236505
GO:0080167	P:response_to_karrikin	6	1.04071e-24	Transcript_004493;Transcript_016420;Transcript_163988;Transcript_196954;Transcript_209211;Transcript_223119
ko05205	Proteoglycans_in_cancer	5	1.29216e-24	Transcript_013342;Transcript_020362;Transcript_101332;Transcript_113548;Transcript_123266
ko04310	Wnt_signaling_pathway	11	1.49082e-24	Transcript_025456;Transcript_028007;Transcript_029089;Transcript_033017;Transcript_052856;Transcript_061518;Transcript_083204;Transcript_098438;Transcript_100197;Transcript_113548;Transcript_149776
GO:0008565	F:protein_transporter_activity	15	1.73094e-24	Transcript_014649;Transcript_016204;Transcript_018757;Transcript_018940;Transcript_027502;Transcript_033908;Transcript_043468;Transcript_108981;Transcript_156026;Transcript_187119;Transcript_206246;Transcript_207612;Transcript_235418;Transcript_241108;Transcript_243146
ko04072	Phospholipase_D_signaling_pathway	3	1.84707e-24	Transcript_042004;Transcript_157618;Transcript_185415
GO:0043547	P:positive_regulation_of_GTPase_activity	8	2.08748e-24	Transcript_015116;Transcript_016560;Transcript_028795;Transcript_043014;Transcript_043402;Transcript_044539;Transcript_136358;Transcript_194992
ko00280	Valine,_leucine_and_isoleucine_degradation	11	2.1185e-24	Transcript_016624;Transcript_016755;Transcript_020906;Transcript_021346;Transcript_021635;Transcript_121426;Transcript_149539;Transcript_160618;Transcript_223630;Transcript_234175;Transcript_237552
GO:0016568	P:chromatin_modification	14	2.38674e-24	Transcript_023610;Transcript_027836;Transcript_037498;Transcript_063895;Transcript_082825;Transcript_099209;Transcript_150574;Transcript_153091;Transcript_184165;Transcript_195393;Transcript_222148;Transcript_224333;Transcript_235950;Transcript_240345
ko05134	Legionellosis	5	2.6567e-24	Transcript_006675;Transcript_023404;Transcript_027729;Transcript_147891;Transcript_193507
ko05034	Alcoholism	3	3.48287e-24	Transcript_013342;Transcript_015927;Transcript_031079
ko04111	Cell_cycle_-_yeast	14	6.1481e-24	Transcript_015425;Transcript_015977;Transcript_018082;Transcript_028007;Transcript_031434;Transcript_036736;Transcript_041712;Transcript_052856;Transcript_061518;Transcript_083204;Transcript_137697;Transcript_149776;Transcript_189362;Transcript_208085
ko04212	Longevity_regulating_pathway_-_worm	9	8.03832e-24	Transcript_006675;Transcript_027729;Transcript_030798;Transcript_044737;Transcript_047691;Transcript_048202;Transcript_096671;Transcript_168591;Transcript_182863
GO:0009416	P:response_to_light_stimulus	9	8.03832e-24	Transcript_016420;Transcript_163988;Transcript_187753;Transcript_217546;Transcript_230751;Transcript_231234;Transcript_231533;Transcript_242340;Transcript_242667
GO:0009742	P:brassinosteroid_mediated_signaling_pathway	3	1.04784e-23	Transcript_025206;Transcript_168520;Transcript_188104
ko00270	Cysteine_and_methionine_metabolism	12	1.34675e-23	Transcript_000056;Transcript_007900;Transcript_017810;Transcript_034831;Transcript_042822;Transcript_100859;Transcript_135572;Transcript_157295;Transcript_189646;Transcript_216545;Transcript_234396;Transcript_243351
ko00053	Ascorbate_and_aldarate_metabolism	3	1.51429e-23	Transcript_008396;Transcript_016780;Transcript_234175
GO:0015035	F:protein_disulfide_oxidoreductase_activity	7	1.74396e-23	Transcript_014604;Transcript_019529;Transcript_035963;Transcript_037644;Transcript_156926;Transcript_223304;Transcript_230068
GO:0030244	P:cellulose_biosynthetic_process	7	2.48582e-23	Transcript_005015;Transcript_014494;Transcript_015198;Transcript_148491;Transcript_155240;Transcript_180358;Transcript_223233
ko04013	MAPK_signaling_pathway_-_fly	10	2.69764e-23	Transcript_008202;Transcript_015425;Transcript_025456;Transcript_029089;Transcript_044737;Transcript_100197;Transcript_106058;Transcript_113548;Transcript_188300;Transcript_222869
ko04919	Thyroid_hormone_signaling_pathway	3	3.1676e-23	Transcript_019060;Transcript_098438;Transcript_123266
ko00630	Glyoxylate_and_dicarboxylate_metabolism	11	3.24209e-23	Transcript_007900;Transcript_016540;Transcript_017810;Transcript_018746;Transcript_020906;Transcript_023212;Transcript_082227;Transcript_121426;Transcript_214102;Transcript_226878;Transcript_243550
GO:0010150	P:leaf_senescence	8	3.37176e-23	Transcript_042206;Transcript_055024;Transcript_061772;Transcript_159124;Transcript_187590;Transcript_192644;Transcript_196215;Transcript_235625
GO:0004721	F:phosphoprotein_phosphatase_activity	9	4.35764e-23	Transcript_015425;Transcript_015882;Transcript_024005;Transcript_025206;Transcript_027518;Transcript_131765;Transcript_139813;Transcript_154200;Transcript_209422
ko03060	Protein_export	5	4.869e-23	Transcript_016146;Transcript_070004;Transcript_083711;Transcript_217083;Transcript_232885
ko00052	Galactose_metabolism	6	7.30992e-23	Transcript_005053;Transcript_038026;Transcript_043532;Transcript_213712;Transcript_229106;Transcript_238199
GO:0032482	P:Rab_protein_signal_transduction	5	1.01379e-22	Transcript_002675;Transcript_008354;Transcript_147891;Transcript_176002;Transcript_185131
GO:0045490	P:pectin_catabolic_process	5	1.01379e-22	Transcript_003497;Transcript_042628;Transcript_067062;Transcript_069670;Transcript_242246
GO:0048471	C:perinuclear_region_of_cytoplasm	11	1.30399e-22	Transcript_002621;Transcript_008597;Transcript_014759;Transcript_016203;Transcript_022100;Transcript_036736;Transcript_040271;Transcript_108981;Transcript_192590;Transcript_194884;Transcript_223956
GO:0000226	P:microtubule_cytoskeleton_organization	3	1.3949e-22	Transcript_002427;Transcript_029875;Transcript_195701
GO:0005764	C:lysosome	6	1.5079e-22	Transcript_023068;Transcript_025674;Transcript_077638;Transcript_156977;Transcript_201430;Transcript_235663
ko00680	Methane_metabolism	10	2.19556e-22	Transcript_014114;Transcript_016946;Transcript_027666;Transcript_035046;Transcript_038026;Transcript_044198;Transcript_150940;Transcript_213712;Transcript_226878;Transcript_236821
GO:0005096	F:GTPase_activator_activity_	8	2.82435e-22	Transcript_012966;Transcript_015116;Transcript_028795;Transcript_037026;Transcript_043014;Transcript_044539;Transcript_084010;Transcript_204236
GO:0009658	P:chloroplast_organization	5	3.98823e-22	Transcript_034660;Transcript_143265;Transcript_187753;Transcript_192279;Transcript_204443
ko04921	Oxytocin_signaling_pathway	2	4.03251e-22	Transcript_013342;Transcript_123266
GO:0051028	P:mRNA_transport	6	4.4899e-22	Transcript_048932;Transcript_118749;Transcript_128010;Transcript_180857;Transcript_199146;Transcript_208937
GO:0009624	P:response_to_nematode	5	5.7079e-22	Transcript_042145;Transcript_078260;Transcript_127987;Transcript_142152;Transcript_231533
GO:0004601	F:peroxidase_activity	5	5.7079e-22	Transcript_001865;Transcript_029297;Transcript_060152;Transcript_190763;Transcript_196627
GO:0030529	C:ribonucleoprotein_complex	10	6.33485e-22	Transcript_009704;Transcript_013172;Transcript_023301;Transcript_026077;Transcript_027323;Transcript_193507;Transcript_208090;Transcript_225044;Transcript_226817;Transcript_231660
GO:0009909	P:regulation_of_flower_development	10	6.33485e-22	Transcript_000361;Transcript_023102;Transcript_033045;Transcript_042145;Transcript_096084;Transcript_108837;Transcript_144160;Transcript_202542;Transcript_231234;Transcript_242667
GO:0005819	C:spindle	5	1.17136e-21	Transcript_015116;Transcript_044539;Transcript_061518;Transcript_149776;Transcript_154200
GO:0015297	F:antiporter_activity	4	2.21021e-21	Transcript_029830;Transcript_034534;Transcript_042104;Transcript_063605
GO:0006974	P:cellular_response_to_DNA_damage_stimulus	7	2.39534e-21	Transcript_022196;Transcript_042145;Transcript_108778;Transcript_196318;Transcript_226114;Transcript_233284;Transcript_236505
GO:0008233	F:peptidase_activity	5	2.40993e-21	Transcript_018082;Transcript_070004;Transcript_156977;Transcript_158012;Transcript_222943
GO:0006888	P:ER_to_Golgi_vesicle-mediated_transport	9	2.76814e-21	Transcript_001104;Transcript_015783;Transcript_039015;Transcript_043014;Transcript_147891;Transcript_161644;Transcript_184894;Transcript_194884;Transcript_223956
ko00071	Fatty_acid_degradation	8	3.1353e-21	Transcript_016755;Transcript_026760;Transcript_079374;Transcript_160618;Transcript_223630;Transcript_233892;Transcript_234175;Transcript_237552
ko04722	Neurotrophin_signaling_pathway	4	3.19317e-21	Transcript_113548;Transcript_186849;Transcript_199469;Transcript_226800
GO:0008234	F:cysteine-type_peptidase_activity	7	3.40757e-21	Transcript_088907;Transcript_096377;Transcript_153902;Transcript_153950;Transcript_194185;Transcript_201430;Transcript_227277
ko04113	Meiosis_-_yeast	10	4.71662e-21	Transcript_013342;Transcript_015425;Transcript_018082;Transcript_023274;Transcript_031434;Transcript_036736;Transcript_041712;Transcript_128635;Transcript_137697;Transcript_189362
ko00900	Terpenoid_backbone_biosynthesis	7	4.85105e-21	Transcript_018717;Transcript_153355;Transcript_156161;Transcript_172794;Transcript_187797;Transcript_223819;Transcript_226851
GO:0008360	P:regulation_of_cell_shape	8	6.31869e-21	Transcript_033017;Transcript_041385;Transcript_061772;Transcript_149561;Transcript_155810;Transcript_194193;Transcript_230958;Transcript_236530
GO:0009723	P:response_to_ethylene	13	6.53489e-21	Transcript_007304;Transcript_025995;Transcript_038402;Transcript_090430;Transcript_096297;Transcript_145272;Transcript_156818;Transcript_166590;Transcript_185779;Transcript_217546;Transcript_222544;Transcript_227686;Transcript_240304
GO:0015995	P:chlorophyll_biosynthetic_process	3	7.31917e-21	Transcript_026572;Transcript_171704;Transcript_229806
ko04922	Glucagon_signaling_pathway	8	8.98056e-21	Transcript_014114;Transcript_014508;Transcript_016946;Transcript_035318;Transcript_089776;Transcript_096671;Transcript_098438;Transcript_204604
GO:0003682	F:chromatin_binding	4	9.6614e-21	Transcript_015798;Transcript_043402;Transcript_142487;Transcript_194992
GO:0004185	F:serine-type_carboxypeptidase_activity	9	1.11709e-20	Transcript_000791;Transcript_004466;Transcript_010073;Transcript_029823;Transcript_045093;Transcript_118753;Transcript_157341;Transcript_225236;Transcript_230284
GO:0044281	P:small_molecule_metabolic_process	6	1.4794e-20	Transcript_018164;Transcript_120546;Transcript_180845;Transcript_209045;Transcript_228021;Transcript_232471
GO:0015992	P:proton_transport	5	1.47942e-20	Transcript_002810;Transcript_042963;Transcript_084246;Transcript_100187;Transcript_141694
GO:0008283	P:cell_proliferation	12	1.64956e-20	Transcript_015116;Transcript_015798;Transcript_018802;Transcript_024541;Transcript_034176;Transcript_044539;Transcript_083204;Transcript_142487;Transcript_157447;Transcript_201468;Transcript_210757;Transcript_231660
GO:0007018	P:microtubule-based_movement	10	1.90305e-20	Transcript_001256;Transcript_009001;Transcript_016377;Transcript_050497;Transcript_154820;Transcript_163901;Transcript_175416;Transcript_183925;Transcript_199471;Transcript_227602
GO:0051537	F:2_iron,_2_sulfur_cluster_binding	6	2.1204e-20	Transcript_009517;Transcript_019529;Transcript_030330;Transcript_032252;Transcript_035963;Transcript_171704
ko05230	Central_carbon_metabolism_in_cancer	5	2.13068e-20	Transcript_014114;Transcript_016946;Transcript_038026;Transcript_089776;Transcript_213712
GO:0030599	F:pectinesterase_activity	2	2.21527e-20	Transcript_003497;Transcript_069670
ko04011	MAPK_signaling_pathway_-_yeast	9	2.25496e-20	Transcript_041385;Transcript_042004;Transcript_157618;Transcript_185415;Transcript_186849;Transcript_192590;Transcript_226800;Transcript_236530;Transcript_241886
ko04510	Focal_adhesion	3	3.18311e-20	Transcript_013342;Transcript_113548;Transcript_123266
ko04070	Phosphatidylinositol_signaling_system	9	4.56631e-20	Transcript_008396;Transcript_014528;Transcript_042004;Transcript_088132;Transcript_157618;Transcript_185415;Transcript_192590;Transcript_222019;Transcript_234135
GO:0032580	C:Golgi_cisterna_membrane	4	7.72098e-20	Transcript_021186;Transcript_144405;Transcript_180845;Transcript_184894
GO:0010228	P:vegetative_to_reproductive_phase_transition_of_meristem	6	8.32162e-20	Transcript_000361;Transcript_027836;Transcript_074557;Transcript_096084;Transcript_192119;Transcript_222390
GO:0031201	C:SNARE_complex	6	9.00747e-20	Transcript_025370;Transcript_039015;Transcript_041422;Transcript_161644;Transcript_193394;Transcript_234643
GO:0003887	F:DNA-directed_DNA_polymerase_activity	3	9.63909e-20	Transcript_130853;Transcript_210615;Transcript_222943
GO:0003899	F:DNA-directed_RNA_polymerase_activity	8	1.07465e-19	Transcript_012987;Transcript_023999;Transcript_028183;Transcript_045479;Transcript_177859;Transcript_180390;Transcript_235951;Transcript_237292
ko05164	Influenza_A	4	1.10929e-19	Transcript_098438;Transcript_123266;Transcript_193507;Transcript_199469
GO:0031902	C:late_endosome_membrane	10	1.4137e-19	Transcript_015947;Transcript_025370;Transcript_027057;Transcript_039015;Transcript_041422;Transcript_062135;Transcript_161644;Transcript_225636;Transcript_237969;Transcript_244423
ko05120	Epithelial_cell_signaling_in_Helicobacter_pylori_infection	4	1.59466e-19	Transcript_009757;Transcript_080670;Transcript_113548;Transcript_168752
ko00330	Arginine_and_proline_metabolism	6	1.68184e-19	Transcript_034831;Transcript_042380;Transcript_135572;Transcript_160512;Transcript_234175;Transcript_235388
GO:0042254	P:ribosome_biogenesis	9	2.40841e-19	Transcript_007868;Transcript_017225;Transcript_035138;Transcript_041888;Transcript_146844;Transcript_188939;Transcript_226154;Transcript_229572;Transcript_233893
GO:0018298	P:protein-chromophore_linkage	10	2.8121e-19	Transcript_005179;Transcript_018416;Transcript_043402;Transcript_109012;Transcript_145533;Transcript_152342;Transcript_155928;Transcript_194992;Transcript_201460;Transcript_237130
ko04130	SNARE_interactions_in_vesicular_transport	3	2.93233e-19	Transcript_041422;Transcript_193394;Transcript_234643
GO:0009860	P:pollen_tube_growth	6	3.40825e-19	Transcript_009286;Transcript_034316;Transcript_036091;Transcript_155810;Transcript_239941;Transcript_242855
GO:0042973	F:glucan_endo-1,3-beta-D-glucosidase_activity	3	3.87455e-19	Transcript_008678;Transcript_176122;Transcript_231204
GO:0005871	C:kinesin_complex	10	3.97117e-19	Transcript_001256;Transcript_009001;Transcript_016377;Transcript_050497;Transcript_154820;Transcript_163901;Transcript_175416;Transcript_183925;Transcript_199471;Transcript_227602
ko00710	Carbon_fixation_in_photosynthetic_organisms	10	3.97117e-19	Transcript_007900;Transcript_017810;Transcript_027666;Transcript_034831;Transcript_108985;Transcript_142152;Transcript_161222;Transcript_166804;Transcript_236821;Transcript_243550
GO:0006508	P:proteolysis	9	4.8122e-19	Transcript_022485;Transcript_029823;Transcript_031618;Transcript_078776;Transcript_083204;Transcript_156977;Transcript_166298;Transcript_197673;Transcript_227452
GO:0045087	P:innate_immune_response	6	9.88266e-19	Transcript_006795;Transcript_012987;Transcript_023301;Transcript_105842;Transcript_197004;Transcript_226817
GO:0000785	C:chromatin_	5	1.01833e-18	Transcript_024766;Transcript_031363;Transcript_043402;Transcript_185779;Transcript_194992
GO:0018105	P:peptidyl-serine_phosphorylation	8	1.13792e-18	Transcript_015977;Transcript_033017;Transcript_041385;Transcript_201137;Transcript_202384;Transcript_220376;Transcript_235878;Transcript_236530
GO:0016788	F:hydrolase_activity,_acting_on_ester_bonds	8	1.61609e-18	Transcript_024035;Transcript_070780;Transcript_176855;Transcript_187315;Transcript_195839;Transcript_198345;Transcript_218059;Transcript_226191
GO:0006006	P:glucose_metabolic_process	3	1.65012e-18	Transcript_010592;Transcript_043532;Transcript_229106
GO:0071013	C:catalytic_step_2_spliceosome_	4	2.96895e-18	Transcript_153181;Transcript_159255;Transcript_188701;Transcript_241730
ko00562	Inositol_phosphate_metabolism	9	3.6584e-18	Transcript_008396;Transcript_014528;Transcript_042004;Transcript_088132;Transcript_157618;Transcript_185415;Transcript_192590;Transcript_222019;Transcript_234135
GO:0006869	P:lipid_transport	9	3.6584e-18	Transcript_018841;Transcript_029492;Transcript_053565;Transcript_059959;Transcript_087883;Transcript_150018;Transcript_217546;Transcript_219033;Transcript_233419
GO:0000209	P:protein_polyubiquitination	4	3.88434e-18	Transcript_123520;Transcript_123857;Transcript_215401;Transcript_243787
ko04068	FoxO_signaling_pathway	4	3.88434e-18	Transcript_014508;Transcript_044737;Transcript_098438;Transcript_168591
GO:0008137	F:NADH_dehydrogenase_(ubiquinone)_activity	10	4.14571e-18	Transcript_004880;Transcript_016315;Transcript_023779;Transcript_152859;Transcript_198631;Transcript_204893;Transcript_219022;Transcript_235200;Transcript_236234;Transcript_239152
GO:0003729	F:mRNA_binding	12	4.96095e-18	Transcript_006236;Transcript_006795;Transcript_016483;Transcript_023212;Transcript_025855;Transcript_043594;Transcript_051286;Transcript_079374;Transcript_110572;Transcript_185145;Transcript_195453;Transcript_223074
GO:0003746	F:translation_elongation_factor_activity	7	5.3466e-18	Transcript_004843;Transcript_016986;Transcript_028857;Transcript_041538;Transcript_041684;Transcript_190715;Transcript_227097
GO:0009751	P:response_to_salicylic_acid	13	6.93042e-18	Transcript_007304;Transcript_007694;Transcript_020324;Transcript_034582;Transcript_041372;Transcript_042206;Transcript_096297;Transcript_181429;Transcript_185779;Transcript_199534;Transcript_224109;Transcript_238051;Transcript_240304
ko04022	cGMP-PKG_signaling_pathway	9	7.22418e-18	Transcript_013342;Transcript_016203;Transcript_019608;Transcript_026322;Transcript_031338;Transcript_045165;Transcript_093127;Transcript_169520;Transcript_233863
GO:0016226	P:iron-sulfur_cluster_assembly	2	7.62793e-18	Transcript_009517;Transcript_096109
ko00410	beta-Alanine_metabolism	7	1.00829e-17	Transcript_027691;Transcript_042380;Transcript_222613;Transcript_223630;Transcript_225771;Transcript_234175;Transcript_237552
GO:0042744	P:hydrogen_peroxide_catabolic_process	7	1.00829e-17	Transcript_001865;Transcript_006334;Transcript_018511;Transcript_060152;Transcript_190763;Transcript_196627;Transcript_233284
ko00380	Tryptophan_metabolism	3	1.02155e-17	Transcript_203816;Transcript_223630;Transcript_234175
ko01210	2-Oxocarboxylic_acid_metabolism	7	1.09092e-17	Transcript_016540;Transcript_023212;Transcript_031557;Transcript_034831;Transcript_135572;Transcript_157295;Transcript_243550
ko00310	Lysine_degradation	7	1.09092e-17	Transcript_027488;Transcript_031909;Transcript_160957;Transcript_203816;Transcript_223630;Transcript_227947;Transcript_234175
GO:0006950	P:response_to_stress	6	1.11568e-17	Transcript_012241;Transcript_013042;Transcript_110097;Transcript_174640;Transcript_184756;Transcript_238387
ko00860	Porphyrin_and_chlorophyll_metabolism	4	1.13674e-17	Transcript_026572;Transcript_171704;Transcript_211261;Transcript_237396
ko04213	Longevity_regulating_pathway_-_multiple_species	5	1.16587e-17	Transcript_044737;Transcript_067992;Transcript_193507;Transcript_221971;Transcript_228967
GO:0048366	P:leaf_development	12	1.29891e-17	Transcript_011878;Transcript_013781;Transcript_016473;Transcript_031558;Transcript_044327;Transcript_061518;Transcript_074557;Transcript_149776;Transcript_176239;Transcript_182308;Transcript_212191;Transcript_225726
ko00510	N-Glycan_biosynthesis	6	1.58177e-17	Transcript_004469;Transcript_010111;Transcript_019295;Transcript_179976;Transcript_227688;Transcript_229590
GO:0015299	F:solute:proton_antiporter_activity	2	1.58219e-17	Transcript_017321;Transcript_191818
ko04211	Longevity_regulating_pathway	4	1.62785e-17	Transcript_027488;Transcript_044737;Transcript_209739;Transcript_221971
GO:0005643	C:nuclear_pore	3	2.12594e-17	Transcript_118749;Transcript_158395;Transcript_199146
ko04066	HIF-1_signaling_pathway	4	2.33248e-17	Transcript_000223;Transcript_083204;Transcript_098438;Transcript_226584
ko05145	Toxoplasmosis	5	2.36563e-17	Transcript_193507;Transcript_199469;Transcript_202384;Transcript_220376;Transcript_235878
GO:0000932	C:cytoplasmic_mRNA_processing_body	7	2.85053e-17	Transcript_014461;Transcript_032972;Transcript_158530;Transcript_180390;Transcript_191361;Transcript_212567;Transcript_214662
GO:0005741	C:mitochondrial_outer_membrane_	6	3.18584e-17	Transcript_019608;Transcript_026708;Transcript_039199;Transcript_050536;Transcript_150115;Transcript_169480
GO:0042545	P:cell_wall_modification	2	3.28781e-17	Transcript_003497;Transcript_069670
GO:0009585	P:red,_far-red_light_phototransduction	4	3.34407e-17	Transcript_034660;Transcript_108837;Transcript_109012;Transcript_237130
GO:0031047	P:gene_silencing_by_RNA	9	4.01477e-17	Transcript_009704;Transcript_013527;Transcript_013909;Transcript_031558;Transcript_177859;Transcript_206484;Transcript_220063;Transcript_237979;Transcript_242218
GO:0042787	P:protein_ubiquitination_involved_in_ubiquitin-dependent_protein_catabolic_process	3	4.43342e-17	Transcript_061518;Transcript_083204;Transcript_149776
GO:0006098	P:pentose-phosphate_shunt	5	4.81216e-17	Transcript_010592;Transcript_108985;Transcript_142152;Transcript_228021;Transcript_232471
GO:0009845	P:seed_germination	5	4.81216e-17	Transcript_031559;Transcript_096084;Transcript_144277;Transcript_158530;Transcript_159282
GO:0008422	F:beta-glucosidase_activity	3	6.40711e-17	Transcript_189113;Transcript_233010;Transcript_235608
ko04010	MAPK_signaling_pathway	3	6.40711e-17	Transcript_113548;Transcript_139813;Transcript_193507
GO:0003777	F:microtubule_motor_activity	10	6.41406e-17	Transcript_001256;Transcript_009001;Transcript_016377;Transcript_050497;Transcript_154820;Transcript_163901;Transcript_175416;Transcript_183925;Transcript_199471;Transcript_227602
GO:0008237	F:metallopeptidase_activity	5	6.86988e-17	Transcript_018744;Transcript_030606;Transcript_042380;Transcript_079927;Transcript_154408
GO:0009543	C:chloroplast_thylakoid_lumen_	5	6.86988e-17	Transcript_011737;Transcript_024497;Transcript_079322;Transcript_162207;Transcript_198102
ko00400	Phenylalanine,_tyrosine_and_tryptophan_biosynthesis	8	6.89649e-17	Transcript_010836;Transcript_013619;Transcript_034831;Transcript_042248;Transcript_090733;Transcript_109203;Transcript_135572;Transcript_190091
GO:0005198	F:structural_molecule_activity	7	8.11151e-17	Transcript_020236;Transcript_031747;Transcript_043263;Transcript_044971;Transcript_096109;Transcript_149903;Transcript_226688
ko04972	Pancreatic_secretion	6	9.15308e-17	Transcript_002675;Transcript_016203;Transcript_026322;Transcript_093127;Transcript_113548;Transcript_185131
GO:0006915	P:apoptotic_process	8	9.76487e-17	Transcript_006795;Transcript_037498;Transcript_040271;Transcript_101332;Transcript_114187;Transcript_138761;Transcript_195453;Transcript_229810
GO:0005623	C:cell_	4	9.88909e-17	Transcript_018740;Transcript_020324;Transcript_025510;Transcript_065403
GO:0000911	P:cytokinesis_by_cell_plate_formation	6	1.30298e-16	Transcript_009001;Transcript_011266;Transcript_018082;Transcript_175416;Transcript_199471;Transcript_243720
ko04360	Axon_guidance	2	1.42769e-16	Transcript_019534;Transcript_113548
GO:0006310	P:DNA_recombination	14	1.82152e-16	Transcript_009825;Transcript_016415;Transcript_022196;Transcript_026221;Transcript_090284;Transcript_130853;Transcript_155389;Transcript_155807;Transcript_188668;Transcript_196318;Transcript_206170;Transcript_215297;Transcript_222943;Transcript_236505
GO:0010181	F:FMN_binding	3	2.51968e-16	Transcript_018331;Transcript_028047;Transcript_052466
GO:0005875	C:microtubule_associated_complex	12	2.63312e-16	Transcript_048069;Transcript_059959;Transcript_081381;Transcript_109626;Transcript_156448;Transcript_186849;Transcript_188701;Transcript_189533;Transcript_211478;Transcript_225114;Transcript_233284;Transcript_237552
GO:0010287	C:plastoglobule	5	2.87154e-16	Transcript_005179;Transcript_016897;Transcript_021772;Transcript_045938;Transcript_155928
GO:0005811	C:lipid_particle	11	3.49088e-16	Transcript_002621;Transcript_026611;Transcript_042963;Transcript_043185;Transcript_059959;Transcript_109626;Transcript_149539;Transcript_149814;Transcript_184894;Transcript_226282;Transcript_237552
GO:0008643	P:carbohydrate_transport	11	3.49088e-16	Transcript_004778;Transcript_006913;Transcript_027427;Transcript_034534;Transcript_044160;Transcript_097999;Transcript_158070;Transcript_230685;Transcript_233903;Transcript_235414;Transcript_236807
ko04261	Adrenergic_signaling_in_cardiomyocytes	5	4.11219e-16	Transcript_013342;Transcript_015425;Transcript_023274;Transcript_093127;Transcript_128635
GO:0045330	F:aspartyl_esterase_activity	2	4.31576e-16	Transcript_003497;Transcript_069670
GO:0000049	F:tRNA_binding	2	4.31576e-16	Transcript_016005;Transcript_149452
GO:0000786	C:nucleosome	12	4.8373e-16	Transcript_007448;Transcript_015927;Transcript_031079;Transcript_044768;Transcript_130510;Transcript_161679;Transcript_185779;Transcript_199370;Transcript_219776;Transcript_221310;Transcript_229840;Transcript_232594
ko00030	Pentose_phosphate_pathway	12	5.18928e-16	Transcript_005402;Transcript_027666;Transcript_038026;Transcript_108985;Transcript_142152;Transcript_149539;Transcript_161222;Transcript_166804;Transcript_213712;Transcript_227092;Transcript_228021;Transcript_232471
GO:0019898	C:extrinsic_component_of_membrane	5	5.8924e-16	Transcript_024497;Transcript_079322;Transcript_096106;Transcript_168591;Transcript_174990
GO:0004197	F:cysteine-type_endopeptidase_activity	7	6.22778e-16	Transcript_018082;Transcript_122153;Transcript_149903;Transcript_156977;Transcript_175291;Transcript_199141;Transcript_201430
GO:0015986	P:ATP_synthesis_coupled_proton_transport	8	7.27194e-16	Transcript_006390;Transcript_023555;Transcript_026611;Transcript_040111;Transcript_043185;Transcript_045337;Transcript_201255;Transcript_205374
ko00250	Alanine,_aspartate_and_glutamate_metabolism	8	7.27194e-16	Transcript_018746;Transcript_018842;Transcript_028047;Transcript_030288;Transcript_034831;Transcript_135572;Transcript_226878;Transcript_243550
GO:0005758	C:mitochondrial_intermembrane_space	3	7.42826e-16	Transcript_009517;Transcript_018784;Transcript_213719
GO:0005484	F:SNAP_receptor_activity	6	7.69334e-16	Transcript_023676;Transcript_025370;Transcript_039015;Transcript_041422;Transcript_071779;Transcript_161644
GO:0016036	P:cellular_response_to_phosphate_starvation	6	1.01361e-15	Transcript_016721;Transcript_025940;Transcript_028368;Transcript_172102;Transcript_215202;Transcript_239329
GO:0016758	F:transferase_activity,_transferring_hexosyl_groups	8	1.02262e-15	Transcript_008882;Transcript_010048;Transcript_017600;Transcript_021872;Transcript_044017;Transcript_227191;Transcript_230404;Transcript_232163
GO:0010467	P:gene_expression	6	1.09947e-15	Transcript_012987;Transcript_026774;Transcript_043594;Transcript_136358;Transcript_159255;Transcript_230984
GO:0004298	F:threonine-type_endopeptidase_activity	6	1.09947e-15	Transcript_002519;Transcript_008163;Transcript_018525;Transcript_131551;Transcript_213671;Transcript_227452
ko00640	Propanoate_metabolism	6	1.09947e-15	Transcript_020906;Transcript_121426;Transcript_223630;Transcript_233389;Transcript_233806;Transcript_237552
GO:0010224	P:response_to_UV-B	5	1.10989e-15	Transcript_043402;Transcript_143265;Transcript_194992;Transcript_224333;Transcript_242340
GO:0042542	P:response_to_hydrogen_peroxide	6	1.43261e-15	Transcript_011264;Transcript_025598;Transcript_035390;Transcript_139661;Transcript_157859;Transcript_165034
GO:0009607	P:response_to_biotic_stimulus_	5	1.57497e-15	Transcript_088334;Transcript_097377;Transcript_158717;Transcript_177580;Transcript_215244
GO:0005200	F:structural_constituent_of_cytoskeleton	9	1.61921e-15	Transcript_004764;Transcript_004842;Transcript_030679;Transcript_043075;Transcript_103380;Transcript_168236;Transcript_179927;Transcript_197714;Transcript_238919
GO:0043066	P:negative_regulation_of_apoptotic_process	6	2.0262e-15	Transcript_009517;Transcript_101332;Transcript_114187;Transcript_138761;Transcript_229810;Transcript_234175
ko00061	Fatty_acid_biosynthesis	8	2.02694e-15	Transcript_008095;Transcript_026760;Transcript_027173;Transcript_095317;Transcript_202366;Transcript_233389;Transcript_233892;Transcript_242079
GO:0006606	P:protein_import_into_nucleus	8	2.02694e-15	Transcript_014649;Transcript_016204;Transcript_018940;Transcript_108981;Transcript_158395;Transcript_235418;Transcript_241108;Transcript_243146
GO:0009965	P:leaf_morphogenesis	9	2.27939e-15	Transcript_018802;Transcript_034176;Transcript_061772;Transcript_092175;Transcript_188104;Transcript_210757;Transcript_214662;Transcript_238051;Transcript_240169
GO:0004222	F:metalloendopeptidase_activity	13	2.56454e-15	Transcript_022952;Transcript_026424;Transcript_034221;Transcript_039672;Transcript_093665;Transcript_122035;Transcript_184234;Transcript_187190;Transcript_193422;Transcript_198760;Transcript_222677;Transcript_225384;Transcript_238793
GO:0009636	P:response_to_toxic_substance	2	2.75256e-15	Transcript_120546;Transcript_209211
ko05323	Rheumatoid_arthritis	3	3.16327e-15	Transcript_009757;Transcript_080670;Transcript_168752
GO:0006446	P:regulation_of_translational_initiation	5	3.17744e-15	Transcript_031078;Transcript_042437;Transcript_148931;Transcript_224747;Transcript_235250
ko00513	Various_types_of_N-glycan_biosynthesis	5	3.17744e-15	Transcript_004469;Transcript_010111;Transcript_179976;Transcript_227688;Transcript_229590
GO:0004177	F:aminopeptidase_activity	4	3.30064e-15	Transcript_030606;Transcript_044748;Transcript_079927;Transcript_181757
GO:0048544	P:recognition_of_pollen	4	3.30064e-15	Transcript_010355;Transcript_127606;Transcript_152063;Transcript_233702
GO:0031408	P:oxylipin_biosynthetic_process	4	3.30064e-15	Transcript_016755;Transcript_069110;Transcript_160618;Transcript_230274
GO:0007017	P:microtubule-based_process	7	3.47355e-15	Transcript_004764;Transcript_004842;Transcript_030679;Transcript_043075;Transcript_103380;Transcript_168236;Transcript_179927
GO:0009640	P:photomorphogenesis	2	3.99253e-15	Transcript_034660;Transcript_096084
ko04720	Long-term_potentiation	2	3.99253e-15	Transcript_013342;Transcript_098438
GO:0006906	P:vesicle_fusion	5	4.51743e-15	Transcript_025370;Transcript_041422;Transcript_071779;Transcript_193394;Transcript_234643
GO:0048481	P:ovule_development	3	4.55007e-15	Transcript_192279;Transcript_192644;Transcript_222241
GO:0004857	F:enzyme_inhibitor_activity	3	4.55007e-15	Transcript_003497;Transcript_014604;Transcript_069670
GO:0048573	P:photoperiodism,_flowering	4	4.7165e-15	Transcript_000361;Transcript_097610;Transcript_143778;Transcript_240717
GO:0003993	F:acid_phosphatase_activity	2	5.26408e-15	Transcript_010467;Transcript_028942
GO:0004004	F:ATP-dependent_RNA_helicase_activity	8	5.68868e-15	Transcript_012262;Transcript_020362;Transcript_043594;Transcript_167220;Transcript_175896;Transcript_191819;Transcript_224847;Transcript_232525
GO:0043234	C:protein_complex	6	5.75586e-15	Transcript_018920;Transcript_138366;Transcript_138761;Transcript_187629;Transcript_188939;Transcript_208901
ko03420	Nucleotide_excision_repair	6	5.75586e-15	Transcript_015798;Transcript_021735;Transcript_037500;Transcript_083204;Transcript_142487;Transcript_144160
GO:0009058	P:biosynthetic_process	5	6.42658e-15	Transcript_034831;Transcript_135572;Transcript_157858;Transcript_175458;Transcript_243550
GO:0031966	C:mitochondrial_membrane	11	6.65666e-15	Transcript_026424;Transcript_033063;Transcript_042104;Transcript_042963;Transcript_063605;Transcript_198631;Transcript_198760;Transcript_219022;Transcript_222677;Transcript_238422;Transcript_241709
ko04210	Apoptosis	4	6.74362e-15	Transcript_020236;Transcript_034582;Transcript_123266;Transcript_201430
ko04728	Dopaminergic_synapse	4	6.74362e-15	Transcript_013342;Transcript_015425;Transcript_023274;Transcript_128635
ko03020	RNA_polymerase	5	9.14834e-15	Transcript_012987;Transcript_028183;Transcript_093018;Transcript_150478;Transcript_180390
GO:0009809	P:lignin_biosynthetic_process	4	9.64755e-15	Transcript_011264;Transcript_035390;Transcript_035581;Transcript_157859
GO:0009744	P:response_to_sucrose	7	9.82651e-15	Transcript_000211;Transcript_004493;Transcript_007763;Transcript_030348;Transcript_031338;Transcript_180358;Transcript_223119
GO:0009853	P:photorespiration	3	1.35831e-14	Transcript_002810;Transcript_033063;Transcript_226878
GO:0043621	F:protein_self-association	4	1.38099e-14	Transcript_018841;Transcript_125733;Transcript_155268;Transcript_243378
GO:0000149	F:SNARE_binding	5	1.8573e-14	Transcript_039015;Transcript_071779;Transcript_161644;Transcript_193394;Transcript_234643
GO:0043022	F:ribosome_binding	3	1.95777e-14	Transcript_028857;Transcript_041538;Transcript_157447
GO:0009926	P:auxin_polar_transport	2	2.24897e-14	Transcript_080441;Transcript_229566
ko04015	Rap1_signaling_pathway	2	2.24897e-14	Transcript_113548;Transcript_123266
GO:0005747	C:mitochondrial_respiratory_chain_complex_I_	10	2.43473e-14	Transcript_018784;Transcript_023779;Transcript_033063;Transcript_038402;Transcript_058642;Transcript_121426;Transcript_198631;Transcript_230655;Transcript_239152;Transcript_241845
GO:0051603	P:proteolysis_involved_in_cellular_protein_catabolic_process	4	2.83446e-14	Transcript_039672;Transcript_042077;Transcript_156977;Transcript_201430
ko05132	Salmonella_infection	4	2.83446e-14	Transcript_113548;Transcript_123266;Transcript_197714;Transcript_239448
GO:0006631	P:fatty_acid_metabolic_process	8	2.95436e-14	Transcript_018164;Transcript_026760;Transcript_036876;Transcript_150805;Transcript_223736;Transcript_233892;Transcript_239329;Transcript_239894
ko00720	Carbon_fixation_pathways_in_prokaryotes	3	3.73496e-14	Transcript_023212;Transcript_233389;Transcript_236821
ko04020	Calcium_signaling_pathway	7	3.97008e-14	Transcript_016203;Transcript_019608;Transcript_026322;Transcript_045165;Transcript_093127;Transcript_169520;Transcript_233863
GO:0016760	F:cellulose_synthase_(UDP-forming)_activity	3	4.07304e-14	Transcript_148491;Transcript_155240;Transcript_223233
GO:0009617	P:response_to_bacterium	11	4.62647e-14	Transcript_021247;Transcript_042145;Transcript_042206;Transcript_046886;Transcript_077638;Transcript_145272;Transcript_181429;Transcript_213719;Transcript_225582;Transcript_230274;Transcript_241709
GO:0004871	F:signal_transducer_activity	5	5.39735e-14	Transcript_012392;Transcript_018519;Transcript_139813;Transcript_159282;Transcript_202863
GO:0080008	C:Cul4-RING_E3_ubiquitin_ligase_complex	5	5.39735e-14	Transcript_034660;Transcript_079296;Transcript_083204;Transcript_129702;Transcript_143265
GO:0008017	F:microtubule_binding	8	5.80256e-14	Transcript_016436;Transcript_050497;Transcript_059959;Transcript_079374;Transcript_139813;Transcript_154200;Transcript_154820;Transcript_163901
GO:0046982	F:protein_heterodimerization_activity	2	6.71578e-14	Transcript_186849;Transcript_194997
ko03030	DNA_replication	6	6.73358e-14	Transcript_008432;Transcript_015798;Transcript_036736;Transcript_041712;Transcript_142487;Transcript_144160
ko04914	Progesterone-mediated_oocyte_maturation	7	7.28516e-14	Transcript_003016;Transcript_008616;Transcript_031434;Transcript_110097;Transcript_173351;Transcript_195934;Transcript_201468
ko05215	Prostate_cancer	3	7.61762e-14	Transcript_003016;Transcript_098438;Transcript_110097
GO:0009911	P:positive_regulation_of_flower_development	5	7.71125e-14	Transcript_000361;Transcript_027836;Transcript_108837;Transcript_151278;Transcript_192644
GO:0016055	P:Wnt_signaling_pathway	4	7.72497e-14	Transcript_033017;Transcript_041385;Transcript_059959;Transcript_236530
GO:0009620	P:response_to_fungus	6	8.81397e-14	Transcript_042145;Transcript_061772;Transcript_125015;Transcript_145272;Transcript_192463;Transcript_230274
GO:0005778	C:peroxisomal_membrane	7	1.02385e-13	Transcript_018317;Transcript_021257;Transcript_029830;Transcript_036876;Transcript_082198;Transcript_162000;Transcript_207612
GO:0000122	P:negative_regulation_of_transcription_from_RNA_polymerase_II_promoter	3	1.08874e-13	Transcript_006795;Transcript_228198;Transcript_229005
ko04390	Hippo_signaling_pathway	5	1.10234e-13	Transcript_013342;Transcript_015425;Transcript_123266;Transcript_186849;Transcript_226800
GO:0003697	F:single-stranded_DNA_binding	8	1.14314e-13	Transcript_022100;Transcript_022196;Transcript_031480;Transcript_047736;Transcript_071405;Transcript_185145;Transcript_188668;Transcript_215297
ko03440	Homologous_recombination	2	1.39589e-13	Transcript_031618;Transcript_179895
GO:0009789	P:positive_regulation_of_abscisic_acid-activated_signaling_pathway	2	1.39589e-13	Transcript_028795;Transcript_229938
GO:0009522	C:photosystem_I	5	1.43588e-13	Transcript_005179;Transcript_015999;Transcript_018416;Transcript_145533;Transcript_155928
GO:0009846	P:pollen_germination	3	1.55688e-13	Transcript_155810;Transcript_239941;Transcript_242855
ko05131	Shigellosis	6	1.75088e-13	Transcript_026515;Transcript_097610;Transcript_113548;Transcript_123266;Transcript_197714;Transcript_239448
GO:0004553	F:hydrolase_activity,_hydrolyzing_O-glycosyl_compounds	6	1.75088e-13	Transcript_025565;Transcript_152390;Transcript_217012;Transcript_234475;Transcript_238561;Transcript_243850
GO:0030176	C:integral_component_of_endoplasmic_reticulum_membrane	4	2.21585e-13	Transcript_019295;Transcript_197170;Transcript_232885;Transcript_243848
GO:0009553	P:embryo_sac_development	4	2.21585e-13	Transcript_020142;Transcript_129702;Transcript_222241;Transcript_224656
GO:0048316	P:seed_development	6	2.47023e-13	Transcript_000211;Transcript_002021;Transcript_007763;Transcript_153953;Transcript_188668;Transcript_218059
GO:0008654	P:phospholipid_biosynthetic_process	2	2.90678e-13	Transcript_235785;Transcript_241886
ko05014	Amyotrophic_lateral_sclerosis_(ALS)	2	2.90678e-13	Transcript_067992;Transcript_113548
GO:0009637	P:response_to_blue_light	4	3.15201e-13	Transcript_005179;Transcript_018416;Transcript_096084;Transcript_155928
GO:0007059	P:chromosome_segregation	3	3.1886e-13	Transcript_027057;Transcript_028007;Transcript_225636
GO:1902600	P:hydrogen_ion_transmembrane_transport	2	4.1975e-13	Transcript_017321;Transcript_062728
GO:0016597	F:amino_acid_binding_	9	4.45896e-13	Transcript_035046;Transcript_037064;Transcript_045644;Transcript_120726;Transcript_157295;Transcript_190091;Transcript_197209;Transcript_222192;Transcript_242732
ko00600	Sphingolipid_metabolism	4	4.48628e-13	Transcript_005053;Transcript_041445;Transcript_042796;Transcript_238199
GO:0005543	F:phospholipid_binding	4	4.48628e-13	Transcript_001032;Transcript_015578;Transcript_020324;Transcript_028795
GO:0001666	P:response_to_hypoxia	4	4.48628e-13	Transcript_006923;Transcript_042145;Transcript_042206;Transcript_222544
GO:0042626	F:ATPase_activity,_coupled_to_transmembrane_movement_of_substances	11	4.64434e-13	Transcript_015003;Transcript_021257;Transcript_029113;Transcript_031605;Transcript_088879;Transcript_099781;Transcript_120875;Transcript_199082;Transcript_200150;Transcript_219033;Transcript_222312
GO:0046961	F:proton-transporting_ATPase_activity,_rotational_mechanism	7	5.67393e-13	Transcript_004585;Transcript_023555;Transcript_026611;Transcript_043185;Transcript_205374;Transcript_235352;Transcript_239369
GO:0047262	F:polygalacturonate_4-alpha-galacturonosyltransferase_activity	7	5.67393e-13	Transcript_012883;Transcript_058380;Transcript_074927;Transcript_151634;Transcript_176239;Transcript_218648;Transcript_236296
GO:0019252	P:starch_biosynthetic_process	5	5.77596e-13	Transcript_008643;Transcript_040039;Transcript_041688;Transcript_100859;Transcript_232764
GO:0003333	P:amino_acid_transmembrane_transport	4	6.38904e-13	Transcript_041292;Transcript_063605;Transcript_097145;Transcript_139829
GO:0009736	P:cytokinin-activated_signaling_pathway	4	6.38904e-13	Transcript_024208;Transcript_117469;Transcript_201458;Transcript_228794
GO:0004364	F:glutathione_transferase_activity	3	6.54417e-13	Transcript_175483;Transcript_192715;Transcript_209211
ko00460	Cyanoamino_acid_metabolism	3	6.54417e-13	Transcript_082227;Transcript_233010;Transcript_235608
GO:0009739	P:response_to_gibberellin	6	6.96521e-13	Transcript_080059;Transcript_096297;Transcript_122101;Transcript_181429;Transcript_185779;Transcript_238051
GO:0045944	P:positive_regulation_of_transcription_from_RNA_polymerase_II_promoter	2	8.76455e-13	Transcript_006542;Transcript_212191
GO:0035251	F:UDP-glucosyltransferase_activity	2	8.76455e-13	Transcript_026793;Transcript_087017
GO:0010218	P:response_to_far_red_light	8	8.89551e-13	Transcript_005179;Transcript_018416;Transcript_023102;Transcript_033045;Transcript_034660;Transcript_108837;Transcript_155928;Transcript_202542
ko04920	Adipocytokine_signaling_pathway	3	9.38254e-13	Transcript_026760;Transcript_209739;Transcript_233892
GO:0016126	P:sterol_biosynthetic_process	5	1.1628e-12	Transcript_018717;Transcript_052099;Transcript_058180;Transcript_144277;Transcript_229566
ko05210	Colorectal_cancer	2	1.26732e-12	Transcript_113548;Transcript_172646
GO:0030659	C:cytoplasmic_vesicle_membrane_	2	1.26732e-12	Transcript_165277;Transcript_224039
GO:0051607	P:defense_response_to_virus	2	1.26732e-12	Transcript_012987;Transcript_159124
GO:0010091	P:trichome_branching	2	1.26732e-12	Transcript_041113;Transcript_049149
ko00062	Fatty_acid_elongation	2	1.26732e-12	Transcript_005449;Transcript_223630
ko04520	Adherens_junction	3	1.34589e-12	Transcript_098438;Transcript_113548;Transcript_123266
GO:0030433	P:ER-associated_ubiquitin-dependent_protein_catabolic_process	6	1.39475e-12	Transcript_009034;Transcript_010111;Transcript_043014;Transcript_123857;Transcript_234735;Transcript_241708
GO:0009523	C:photosystem_II	7	1.59832e-12	Transcript_005179;Transcript_018416;Transcript_038206;Transcript_145533;Transcript_152342;Transcript_155928;Transcript_201460
GO:0006890	P:retrograde_vesicle-mediated_transport,_Golgi_to_ER	2	1.83327e-12	Transcript_031747;Transcript_183568
GO:0005839	C:proteasome_core_complex	2	1.83327e-12	Transcript_018525;Transcript_227452
GO:0003756	F:protein_disulfide_isomerase_activity	2	1.83327e-12	Transcript_002621;Transcript_040960
GO:0071805	P:potassium_ion_transmembrane_transport	2	1.83327e-12	Transcript_199402;Transcript_213817
GO:0000184	P:nuclear-transcribed_mRNA_catabolic_process,_nonsense-mediated_decay	4	1.85171e-12	Transcript_014461;Transcript_020362;Transcript_026774;Transcript_230984
GO:0006662	P:glycerol_ether_metabolic_process	4	1.85171e-12	Transcript_014604;Transcript_037644;Transcript_156926;Transcript_223304
GO:0019288	P:isopentenyl_diphosphate_biosynthetic_process,_methylerythritol_4-phosphate_pathway	3	1.9316e-12	Transcript_006334;Transcript_021247;Transcript_153355
GO:0045489	P:pectin_biosynthetic_process	6	1.97558e-12	Transcript_012883;Transcript_058380;Transcript_074927;Transcript_151634;Transcript_176239;Transcript_236296
GO:0016740	F:transferase_activity	8	2.24687e-12	Transcript_024375;Transcript_042206;Transcript_077756;Transcript_095317;Transcript_194914;Transcript_239941;Transcript_242855;Transcript_243351
GO:0051258	P:protein_polymerization	7	2.2602e-12	Transcript_004764;Transcript_004842;Transcript_030679;Transcript_043075;Transcript_103380;Transcript_168236;Transcript_179927
GO:0005770	C:late_endosome	4	2.64305e-12	Transcript_016473;Transcript_206246;Transcript_222407;Transcript_225726
GO:0009707	C:chloroplast_outer_membrane_	4	2.64305e-12	Transcript_025498;Transcript_041446;Transcript_153373;Transcript_239329
GO:0019901	F:protein_kinase_binding	3	2.77359e-12	Transcript_024005;Transcript_160066;Transcript_207184
GO:0001731	P:formation_of_translation_preinitiation_complex	5	3.33661e-12	Transcript_031078;Transcript_042437;Transcript_148931;Transcript_224747;Transcript_235250
GO:0015078	F:hydrogen_ion_transmembrane_transporter_activity	5	3.33661e-12	Transcript_006390;Transcript_009757;Transcript_080670;Transcript_168752;Transcript_230521
ko04115	p53_signaling_pathway	5	3.33661e-12	Transcript_025456;Transcript_029089;Transcript_100197;Transcript_143265;Transcript_145917
GO:0051536	F:iron-sulfur_cluster_binding	2	3.46607e-12	Transcript_096109;Transcript_186722
ko04978	Mineral_absorption	2	3.46607e-12	Transcript_024766;Transcript_035843
GO:0022008	P:neurogenesis	6	3.69932e-12	Transcript_043468;Transcript_083204;Transcript_114187;Transcript_149814;Transcript_210991;Transcript_233806
GO:0010411	P:xyloglucan_metabolic_process	6	3.69932e-12	Transcript_004982;Transcript_025565;Transcript_152390;Transcript_234475;Transcript_238561;Transcript_243850
ko05100	Bacterial_invasion_of_epithelial_cells	4	3.77465e-12	Transcript_113548;Transcript_123266;Transcript_197714;Transcript_239448
ko03460	Fanconi_anemia_pathway	3	3.98454e-12	Transcript_145917;Transcript_179895;Transcript_188668
GO:0005813	C:centrosome_	7	4.09966e-12	Transcript_015798;Transcript_018082;Transcript_023704;Transcript_036736;Transcript_142487;Transcript_186849;Transcript_227797
ko03320	PPAR_signaling_pathway	7	4.09966e-12	Transcript_016755;Transcript_026760;Transcript_087883;Transcript_156448;Transcript_160618;Transcript_233892;Transcript_237552
ko00565	Ether_lipid_metabolism	5	4.74693e-12	Transcript_026222;Transcript_026934;Transcript_189533;Transcript_226282;Transcript_235785
ko05162	Measles	2	4.96818e-12	Transcript_193507;Transcript_199469
GO:0016579	P:protein_deubiquitination	2	4.96818e-12	Transcript_009825;Transcript_122153
GO:0031977	C:thylakoid_lumen	4	5.39362e-12	Transcript_011737;Transcript_024497;Transcript_028942;Transcript_079322
ko04966	Collecting_duct_acid_secretion	3	5.72694e-12	Transcript_009757;Transcript_080670;Transcript_168752
ko00340	Histidine_metabolism	5	6.29094e-12	Transcript_008396;Transcript_011114;Transcript_042380;Transcript_077725;Transcript_234175
GO:0006334	P:nucleosome_assembly	5	6.75713e-12	Transcript_007448;Transcript_185779;Transcript_199370;Transcript_219776;Transcript_229005
GO:0033290	C:eukaryotic_48S_preinitiation_complex	5	6.75713e-12	Transcript_031078;Transcript_042437;Transcript_148931;Transcript_224747;Transcript_235250
GO:0010311	P:lateral_root_formation	2	7.12454e-12	Transcript_229566;Transcript_233903
GO:0031348	P:negative_regulation_of_defense_response	7	8.04621e-12	Transcript_020324;Transcript_023102;Transcript_033045;Transcript_042206;Transcript_100502;Transcript_144160;Transcript_202542
ko04341	Hedgehog_signaling_pathway_-_fly	10	8.35224e-12	Transcript_021020;Transcript_028007;Transcript_031835;Transcript_033017;Transcript_052856;Transcript_061518;Transcript_083204;Transcript_149776;Transcript_175356;Transcript_229385
GO:0005769	C:early_endosome	9	8.42024e-12	Transcript_016473;Transcript_035629;Transcript_081763;Transcript_095467;Transcript_145272;Transcript_193877;Transcript_206246;Transcript_225726;Transcript_233014
GO:0016282	C:eukaryotic_43S_preinitiation_complex_	5	8.85708e-12	Transcript_031078;Transcript_042437;Transcript_148931;Transcript_224747;Transcript_235250
GO:0006396	P:RNA_processing	9	9.01747e-12	Transcript_013172;Transcript_149903;Transcript_151404;Transcript_155268;Transcript_165031;Transcript_175896;Transcript_183290;Transcript_199141;Transcript_226817
GO:0015935	C:small_ribosomal_subunit	4	1.01702e-11	Transcript_081223;Transcript_142689;Transcript_228502;Transcript_236663
GO:0009816	P:defense_response_to_bacterium,_incompatible_interaction	6	1.02259e-11	Transcript_010355;Transcript_034582;Transcript_042206;Transcript_197004;Transcript_199534;Transcript_227686
ko05202	Transcriptional_misregulation_in_cancer	3	1.07806e-11	Transcript_020362;Transcript_034661;Transcript_232386
GO:0042128	P:nitrate_assimilation	4	1.10296e-11	Transcript_018713;Transcript_018746;Transcript_042300;Transcript_153867
GO:0005765	C:lysosomal_membrane	7	1.12842e-11	Transcript_015947;Transcript_027057;Transcript_041445;Transcript_206246;Transcript_208179;Transcript_225082;Transcript_225636
GO:0010182	P:sugar_mediated_signaling_pathway	5	1.24777e-11	Transcript_014461;Transcript_026193;Transcript_096084;Transcript_222544;Transcript_223414
ko04260	Cardiac_muscle_contraction	4	1.43912e-11	Transcript_005630;Transcript_017917;Transcript_038425;Transcript_093530
GO:0008299	P:isoprenoid_biosynthetic_process	4	1.43912e-11	Transcript_021285;Transcript_187797;Transcript_223819;Transcript_229806
GO:0004843	F:ubiquitin-specific_protease_activity	2	1.46717e-11	Transcript_009825;Transcript_122153
ko04270	Vascular_smooth_muscle_contraction	2	1.46717e-11	Transcript_013342;Transcript_031338
ko00980	Metabolism_of_xenobiotics_by_cytochrome_P450	2	1.46717e-11	Transcript_017329;Transcript_209211
ko01040	Biosynthesis_of_unsaturated_fatty_acids	3	1.53479e-11	Transcript_016755;Transcript_160618;Transcript_202366
GO:0006813	P:potassium_ion_transport	3	1.53479e-11	Transcript_191818;Transcript_213817;Transcript_225748
GO:0003824	F:catalytic_activity_	3	1.53479e-11	Transcript_107044;Transcript_153867;Transcript_197407
GO:0005852	C:eukaryotic_translation_initiation_factor_3_complex	5	1.75891e-11	Transcript_031078;Transcript_042437;Transcript_148931;Transcript_224747;Transcript_235250
ko00592	alpha-Linolenic_acid_metabolism	5	1.75891e-11	Transcript_016755;Transcript_079374;Transcript_160618;Transcript_226282;Transcript_230274
GO:0051726	P:regulation_of_cell_cycle	6	2.02082e-11	Transcript_000211;Transcript_004649;Transcript_007763;Transcript_013734;Transcript_016237;Transcript_237558
GO:0000278	P:mitotic_cell_cycle	4	2.03757e-11	Transcript_015798;Transcript_027192;Transcript_036736;Transcript_142487
GO:0016114	P:terpenoid_biosynthetic_process	4	2.03757e-11	Transcript_021247;Transcript_153355;Transcript_226851;Transcript_239780
GO:0016168	F:chlorophyll_binding	7	2.22394e-11	Transcript_005179;Transcript_018416;Transcript_038206;Transcript_145533;Transcript_152342;Transcript_155928;Transcript_201460
ko05161	Hepatitis_B	8	2.22679e-11	Transcript_001691;Transcript_008616;Transcript_015798;Transcript_098438;Transcript_142487;Transcript_173351;Transcript_195934;Transcript_201468
GO:0008152	P:metabolic_process	6	2.84361e-11	Transcript_017874;Transcript_120726;Transcript_197209;Transcript_221871;Transcript_222192;Transcript_242732
GO:0006914	P:autophagy	6	2.84361e-11	Transcript_015783;Transcript_156448;Transcript_167228;Transcript_170081;Transcript_197462;Transcript_238103
GO:0010029	P:regulation_of_seed_germination	4	2.88652e-11	Transcript_044529;Transcript_192119;Transcript_199971;Transcript_209986
ko00350	Tyrosine_metabolism	4	2.88652e-11	Transcript_034831;Transcript_135572;Transcript_198102;Transcript_222613
GO:0015288	F:porin_activity	2	3.02702e-11	Transcript_019608;Transcript_231056
GO:0010023	P:proanthocyanidin_biosynthetic_process	2	3.02702e-11	Transcript_017321;Transcript_035581
ko00450	Selenocompound_metabolism	3	3.11557e-11	Transcript_000056;Transcript_006334;Transcript_034344
GO:0006865	P:amino_acid_transport	3	3.11557e-11	Transcript_139829;Transcript_192136;Transcript_229566
GO:0008236	F:serine-type_peptidase_activity	7	3.12525e-11	Transcript_011737;Transcript_023068;Transcript_025674;Transcript_042077;Transcript_105842;Transcript_172193;Transcript_188304
GO:0006635	P:fatty_acid_beta-oxidation	6	4.00398e-11	Transcript_021257;Transcript_029830;Transcript_079374;Transcript_162000;Transcript_223630;Transcript_237552
GO:0031418	F:L-ascorbic_acid_binding_	6	4.00398e-11	Transcript_160512;Transcript_181616;Transcript_215624;Transcript_220342;Transcript_232480;Transcript_235388
GO:0010114	P:response_to_red_light	8	4.29278e-11	Transcript_005179;Transcript_018416;Transcript_024208;Transcript_034660;Transcript_096084;Transcript_108837;Transcript_155268;Transcript_155928
GO:0004175	F:endopeptidase_activity	7	4.39464e-11	Transcript_002519;Transcript_018525;Transcript_078776;Transcript_131551;Transcript_166298;Transcript_172193;Transcript_227452
GO:0004129	F:cytochrome-c_oxidase_activity	5	4.94517e-11	Transcript_005630;Transcript_036083;Transcript_093530;Transcript_203116;Transcript_224588
GO:0005694	C:chromosome_	6	5.64142e-11	Transcript_009537;Transcript_044742;Transcript_155807;Transcript_186849;Transcript_224710;Transcript_231829
GO:0034605	P:cellular_response_to_heat	2	6.25684e-11	Transcript_065762;Transcript_095486
GO:0007034	P:vacuolar_transport	2	6.25684e-11	Transcript_188871;Transcript_222407
GO:0009615	P:response_to_virus	4	8.23451e-11	Transcript_014088;Transcript_077480;Transcript_186722;Transcript_238051
GO:0009740	P:gibberellic_acid_mediated_signaling_pathway	4	8.23451e-11	Transcript_004493;Transcript_043767;Transcript_080059;Transcript_223119
GO:0016049	P:cell_growth	2	9.00167e-11	Transcript_003601;Transcript_038402
GO:0004707	F:MAP_kinase_activity	2	9.00167e-11	Transcript_026329;Transcript_148996
GO:0005925	C:focal_adhesion	2	9.00167e-11	Transcript_110572;Transcript_197714
ko00625	Chloroalkane_and_chloroalkene_degradation	2	9.00167e-11	Transcript_120546;Transcript_234175
GO:0009306	P:protein_secretion	4	1.16917e-10	Transcript_001032;Transcript_002675;Transcript_025510;Transcript_083711
GO:0006108	P:malate_metabolic_process	4	1.16917e-10	Transcript_007900;Transcript_017810;Transcript_018842;Transcript_236323
GO:0042538	P:hyperosmotic_salinity_response	3	1.29183e-10	Transcript_072587;Transcript_166298;Transcript_172211
GO:0019853	P:L-ascorbic_acid_biosynthetic_process	3	1.29183e-10	Transcript_013410;Transcript_016780;Transcript_217542
GO:0051087	F:chaperone_binding	2	1.29565e-10	Transcript_028401;Transcript_133402
GO:0007030	P:Golgi_organization	2	1.29565e-10	Transcript_087040;Transcript_183568
ko04612	Antigen_processing_and_presentation	8	1.60939e-10	Transcript_003016;Transcript_025913;Transcript_029746;Transcript_045319;Transcript_110097;Transcript_149814;Transcript_193507;Transcript_201430
GO:0008284	P:positive_regulation_of_cell_proliferation	4	1.66096e-10	Transcript_018802;Transcript_019060;Transcript_034176;Transcript_229005
GO:0003774	F:motor_activity	4	1.66096e-10	Transcript_010380;Transcript_017736;Transcript_042212;Transcript_191165
ko04915	Estrogen_signaling_pathway	3	1.84575e-10	Transcript_003016;Transcript_110097;Transcript_193507
ko04140	Regulation_of_autophagy	3	1.84575e-10	Transcript_167228;Transcript_168591;Transcript_242610
GO:0006816	P:calcium_ion_transport	2	1.86571e-10	Transcript_016203;Transcript_026322
GO:0000775	C:chromosome,_centromeric_region_	2	1.86571e-10	Transcript_027488;Transcript_208085
GO:0046930	C:pore_complex	2	1.86571e-10	Transcript_019608;Transcript_231056
ko04350	TGF-beta_signaling_pathway	7	2.18508e-10	Transcript_015425;Transcript_028007;Transcript_052856;Transcript_061518;Transcript_083204;Transcript_098438;Transcript_149776
GO:0016592	C:mediator_complex_	7	2.18508e-10	Transcript_019060;Transcript_082888;Transcript_093644;Transcript_108837;Transcript_227996;Transcript_232598;Transcript_243354
GO:0010501	P:RNA_secondary_structure_unwinding	7	2.18508e-10	Transcript_012262;Transcript_020362;Transcript_043594;Transcript_167220;Transcript_191819;Transcript_224847;Transcript_232525
ko00650	Butanoate_metabolism	4	2.36087e-10	Transcript_016624;Transcript_021346;Transcript_194914;Transcript_223630
GO:0071215	P:cellular_response_to_abscisic_acid_stimulus	2	2.68775e-10	Transcript_018802;Transcript_034176
GO:0034976	P:response_to_endoplasmic_reticulum_stress	2	2.68775e-10	Transcript_002621;Transcript_227688
GO:0004029	F:aldehyde_dehydrogenase_(NAD)_activity	2	2.68775e-10	Transcript_033844;Transcript_234175
GO:0048367	P:shoot_system_development	5	2.80268e-10	Transcript_092175;Transcript_152324;Transcript_155240;Transcript_182308;Transcript_235950
ko04139	Regulation_of_mitophagy_-_yeast	5	2.80268e-10	Transcript_042004;Transcript_057971;Transcript_157618;Transcript_168591;Transcript_185415
GO:0010468	P:regulation_of_gene_expression	6	2.89654e-10	Transcript_012262;Transcript_040271;Transcript_043594;Transcript_044861;Transcript_191819;Transcript_237366
GO:0042546	P:cell_wall_biogenesis	6	2.89654e-10	Transcript_025565;Transcript_152390;Transcript_155240;Transcript_234475;Transcript_238561;Transcript_243850
GO:0005905	C:coated_pit_	6	2.89654e-10	Transcript_022145;Transcript_033018;Transcript_033908;Transcript_043468;Transcript_101433;Transcript_178285
GO:0044267	P:cellular_protein_metabolic_process	6	2.89654e-10	Transcript_022952;Transcript_026774;Transcript_043594;Transcript_136358;Transcript_137810;Transcript_230984
GO:0048038	F:quinone_binding	7	3.04872e-10	Transcript_007347;Transcript_106270;Transcript_158955;Transcript_177859;Transcript_197557;Transcript_222613;Transcript_238422
GO:0016706	F:oxidoreductase_activity,_acting_on_paired_donors,_with_incorporation_or_reduction_of_molecular_oxygen,_2-oxoglutarate_as_one_donor,_and_incorporation_of_one_atom_each_of_oxygen_into_both_donors	8	3.12927e-10	Transcript_024085;Transcript_024375;Transcript_095937;Transcript_149653;Transcript_165068;Transcript_198535;Transcript_202132;Transcript_232291
GO:0005665	C:DNA-directed_RNA_polymerase_II,_core_complex_	4	3.35747e-10	Transcript_093018;Transcript_150478;Transcript_177859;Transcript_180390
GO:0000724	P:double-strand_break_repair_via_homologous_recombination	4	3.35747e-10	Transcript_020142;Transcript_031618;Transcript_145917;Transcript_212191
GO:0006636	P:unsaturated_fatty_acid_biosynthetic_process	4	3.35747e-10	Transcript_008095;Transcript_009381;Transcript_176190;Transcript_199362
GO:0009073	P:aromatic_amino_acid_family_biosynthetic_process	5	3.70837e-10	Transcript_010836;Transcript_042248;Transcript_090733;Transcript_109203;Transcript_169264
ko00220	Arginine_biosynthesis	5	3.70837e-10	Transcript_018746;Transcript_034831;Transcript_135572;Transcript_240346;Transcript_243550
GO:0019253	P:reductive_pentose-phosphate_cycle	3	3.77353e-10	Transcript_042582;Transcript_142152;Transcript_166804
GO:0016324	C:apical_plasma_membrane	2	3.87364e-10	Transcript_009286;Transcript_185415
GO:0004402	F:histone_acetyltransferase_activity	2	3.87364e-10	Transcript_204709;Transcript_240717
GO:0018024	F:histone-lysine_N-methyltransferase_activity	5	3.97165e-10	Transcript_009537;Transcript_044742;Transcript_176103;Transcript_224710;Transcript_231829
GO:0004650	F:polygalacturonase_activity	7	4.25657e-10	Transcript_016328;Transcript_025932;Transcript_077036;Transcript_105933;Transcript_187941;Transcript_222225;Transcript_232696
ko03410	Base_excision_repair	5	5.19747e-10	Transcript_015798;Transcript_049632;Transcript_142487;Transcript_143674;Transcript_197824
GO:0005938	C:cell_cortex_	3	5.3994e-10	Transcript_012807;Transcript_096671;Transcript_191165
GO:0006520	P:cellular_amino_acid_metabolic_process	2	5.58509e-10	Transcript_055405;Transcript_157858
GO:0000105	P:histidine_biosynthetic_process	2	5.58509e-10	Transcript_008396;Transcript_011114
GO:0030136	C:clathrin-coated_vesicle_	6	5.66191e-10	Transcript_011266;Transcript_033018;Transcript_178285;Transcript_184894;Transcript_193877;Transcript_243720
GO:0022891	F:substrate-specific_transmembrane_transporter_activity	7	5.94682e-10	Transcript_004778;Transcript_097999;Transcript_158070;Transcript_211117;Transcript_230685;Transcript_233903;Transcript_236807
ko05211	Renal_cell_carcinoma	4	6.8006e-10	Transcript_083204;Transcript_098438;Transcript_113548;Transcript_226584
GO:0004683	F:calmodulin-dependent_protein_kinase_activity	4	6.8006e-10	Transcript_201137;Transcript_202384;Transcript_220376;Transcript_235878
ko04540	Gap_junction	2	7.3777e-10	Transcript_031338;Transcript_103380
GO:0043025	C:neuronal_cell_body	2	7.3777e-10	Transcript_002621;Transcript_139813
GO:0030001	P:metal_ion_transport	2	7.3777e-10	Transcript_172479;Transcript_232040
GO:0015934	C:large_ribosomal_subunit_	2	7.3777e-10	Transcript_006434;Transcript_049278
ko04530	Tight_junction	2	7.3777e-10	Transcript_015425;Transcript_123266
GO:0006825	P:copper_ion_transport	3	7.7293e-10	Transcript_024766;Transcript_025995;Transcript_213719
GO:0019899	F:enzyme_binding	2	8.05592e-10	Transcript_040271;Transcript_157161
GO:0006891	P:intra-Golgi_vesicle-mediated_transport	2	8.05592e-10	Transcript_039015;Transcript_161644
ko04620	Toll-like_receptor_signaling_pathway	2	8.05592e-10	Transcript_113548;Transcript_199469
GO:0000419	C:DNA-directed_RNA_polymerase_V_complex	2	8.05592e-10	Transcript_093018;Transcript_150478
GO:0042302	F:structural_constituent_of_cuticle	4	8.94546e-10	Transcript_023542;Transcript_165127;Transcript_192002;Transcript_199658
ko05130	Pathogenic_Escherichia_coli_infection	4	9.68554e-10	Transcript_103380;Transcript_123266;Transcript_197714;Transcript_239448
GO:0009501	C:amyloplast_	4	9.68554e-10	Transcript_008643;Transcript_040039;Transcript_041688;Transcript_232764
GO:0006623	P:protein_targeting_to_vacuole	4	9.68554e-10	Transcript_039015;Transcript_071779;Transcript_096106;Transcript_161644
GO:0042981	P:regulation_of_apoptotic_process	4	9.68554e-10	Transcript_012506;Transcript_022653;Transcript_154573;Transcript_195453
GO:0016709	F:oxidoreductase_activity,_acting_on_paired_donors,_with_incorporation_or_reduction_of_molecular_oxygen,_NAD(P)H_as_one_donor,_and_incorporation_of_one_atom_of_oxygen	3	1.02326e-09	Transcript_099845;Transcript_114216;Transcript_239963
GO:0006012	P:galactose_metabolic_process	2	1.05338e-09	Transcript_043532;Transcript_229106
GO:0043130	F:ubiquitin_binding	2	1.05338e-09	Transcript_087040;Transcript_209443
GO:0046835	P:carbohydrate_phosphorylation	2	1.05338e-09	Transcript_038026;Transcript_213712
GO:0046854	P:phosphatidylinositol_phosphorylation	8	1.09416e-09	Transcript_008396;Transcript_019778;Transcript_088132;Transcript_157618;Transcript_185415;Transcript_192590;Transcript_222019;Transcript_234135
GO:0006366	P:transcription_from_RNA_polymerase_II_promoter	8	1.09416e-09	Transcript_002021;Transcript_054599;Transcript_093018;Transcript_150478;Transcript_159255;Transcript_177859;Transcript_180390;Transcript_187506
GO:0042026	P:protein_refolding	3	1.10695e-09	Transcript_006675;Transcript_027729;Transcript_028401
GO:0005085	F:guanyl-nucleotide_exchange_factor_activity	3	1.10695e-09	Transcript_027575;Transcript_043402;Transcript_194992
GO:0007033	P:vacuole_organization	3	1.10695e-09	Transcript_071779;Transcript_088132;Transcript_222019
GO:0005388	F:calcium-transporting_ATPase_activity	7	1.16292e-09	Transcript_016203;Transcript_018271;Transcript_026322;Transcript_031587;Transcript_054446;Transcript_059699;Transcript_093127
GO:0010499	P:proteasomal_ubiquitin-independent_protein_catabolic_process	4	1.26031e-09	Transcript_002519;Transcript_018525;Transcript_131551;Transcript_227452
ko00670	One_carbon_pool_by_folate	3	1.44997e-09	Transcript_209045;Transcript_214102;Transcript_228479
GO:0042393	F:histone_binding	4	1.77661e-09	Transcript_183851;Transcript_199156;Transcript_229005;Transcript_240717
ko03022	Basal_transcription_factors	10	1.8097e-09	Transcript_002021;Transcript_005845;Transcript_023060;Transcript_037500;Transcript_040271;Transcript_054599;Transcript_152118;Transcript_204709;Transcript_214254;Transcript_232617
GO:0010540	P:basipetal_auxin_transport	3	2.05564e-09	Transcript_031605;Transcript_222312;Transcript_244669
GO:0046933	F:proton-transporting_ATP_synthase_activity,_rotational_mechanism	7	2.12878e-09	Transcript_023555;Transcript_026611;Transcript_040111;Transcript_043185;Transcript_045337;Transcript_201255;Transcript_205374
GO:0043424	F:protein_histidine_kinase_binding	2	2.15033e-09	Transcript_149718;Transcript_228794
GO:0009867	P:jasmonic_acid_mediated_signaling_pathway	10	2.48197e-09	Transcript_014461;Transcript_023102;Transcript_033045;Transcript_061518;Transcript_108837;Transcript_149776;Transcript_196773;Transcript_199186;Transcript_202542;Transcript_227686
ko04340	Hedgehog_signaling_pathway	8	2.90126e-09	Transcript_021020;Transcript_031835;Transcript_033017;Transcript_052856;Transcript_061518;Transcript_149776;Transcript_175356;Transcript_229385
GO:0019706	F:protein-cysteine_S-palmitoyltransferase_activity	3	2.91579e-09	Transcript_165277;Transcript_196119;Transcript_224039
GO:0010119	P:regulation_of_stomatal_movement	2	3.07444e-09	Transcript_024005;Transcript_025995
GO:0003713	F:transcription_coactivator_activity	4	3.53617e-09	Transcript_040271;Transcript_108837;Transcript_187506;Transcript_204709
GO:0016117	P:carotenoid_biosynthetic_process	4	3.53617e-09	Transcript_006334;Transcript_023190;Transcript_024453;Transcript_203659
GO:0009931	F:calcium-dependent_protein_serine/threonine_kinase_activity	4	3.53617e-09	Transcript_201137;Transcript_202384;Transcript_220376;Transcript_235878
ko00100	Steroid_biosynthesis	4	3.53617e-09	Transcript_018164;Transcript_052099;Transcript_058180;Transcript_226282
GO:0090502	P:RNA_phosphodiester_bond_hydrolysis,_endonucleolytic	7	4.08635e-09	Transcript_022100;Transcript_023948;Transcript_034582;Transcript_048008;Transcript_069789;Transcript_125733;Transcript_185145
GO:0006357	P:regulation_of_transcription_from_RNA_polymerase_II_promoter	7	4.08635e-09	Transcript_002021;Transcript_004649;Transcript_013734;Transcript_054599;Transcript_187506;Transcript_210991;Transcript_237558
GO:0004693	F:cyclin-dependent_protein_serine/threonine_kinase_activity	5	5.61344e-09	Transcript_000724;Transcript_004963;Transcript_021966;Transcript_028959;Transcript_176223
GO:0006284	P:base-excision_repair	6	5.65192e-09	Transcript_015798;Transcript_020776;Transcript_049632;Transcript_142487;Transcript_143674;Transcript_197824
ko04112	Cell_cycle_-_Caulobacter	3	5.87524e-09	Transcript_047691;Transcript_158550;Transcript_182863
GO:0009627	P:systemic_acquired_resistance	6	6.02697e-09	Transcript_019060;Transcript_042206;Transcript_090681;Transcript_147921;Transcript_212580;Transcript_227688
GO:0000062	F:fatty-acyl-CoA_binding	2	6.29333e-09	Transcript_217546;Transcript_237552
GO:0009664	P:plant-type_cell_wall_organization	6	7.84955e-09	Transcript_095767;Transcript_139328;Transcript_152343;Transcript_184760;Transcript_222950;Transcript_233499
ko03430	Mismatch_repair	5	7.90379e-09	Transcript_015798;Transcript_142487;Transcript_144160;Transcript_172646;Transcript_188668
GO:0051260	P:protein_homooligomerization	2	9.0102e-09	Transcript_039672;Transcript_040271
ko04727	GABAergic_synapse	2	9.0102e-09	Transcript_018746;Transcript_168591
ko00770	Pantothenate_and_CoA_biosynthesis	2	9.0102e-09	Transcript_027691;Transcript_225771
GO:0030145	F:manganese_ion_binding	8	1.01787e-08	Transcript_003701;Transcript_044748;Transcript_048008;Transcript_069789;Transcript_150940;Transcript_151165;Transcript_230958;Transcript_240360
GO:0034599	P:cellular_response_to_oxidative_stress	6	1.09084e-08	Transcript_014604;Transcript_025797;Transcript_027279;Transcript_037644;Transcript_156926;Transcript_206711
GO:0016762	F:xyloglucan:xyloglucosyl_transferase_activity	5	1.11342e-08	Transcript_025565;Transcript_152390;Transcript_234475;Transcript_238561;Transcript_243850
ko00360	Phenylalanine_metabolism	3	1.18618e-08	Transcript_034831;Transcript_135572;Transcript_222613
GO:0003690	F:double-stranded_DNA_binding	2	1.29057e-08	Transcript_031480;Transcript_236505
ko04392	Hippo_signaling_pathway_-multiple_species	2	1.29057e-08	Transcript_041385;Transcript_236530
GO:0006817	P:phosphate_ion_transport	2	1.29057e-08	Transcript_085884;Transcript_215202
GO:0019432	P:triglyceride_biosynthetic_process	2	1.29057e-08	Transcript_016897;Transcript_021772
GO:0006730	P:one-carbon_metabolic_process	8	1.3977e-08	Transcript_006978;Transcript_028080;Transcript_030648;Transcript_042822;Transcript_159028;Transcript_222314;Transcript_227819;Transcript_237995
GO:0008033	P:tRNA_processing	7	1.51734e-08	Transcript_013970;Transcript_016005;Transcript_018331;Transcript_041560;Transcript_113876;Transcript_205336;Transcript_207184
GO:0009862	P:systemic_acquired_resistance,_salicylic_acid_mediated_signaling_pathway	5	1.56925e-08	Transcript_017874;Transcript_018841;Transcript_021247;Transcript_042206;Transcript_221871
GO:0009411	P:response_to_UV	3	1.68666e-08	Transcript_043402;Transcript_186849;Transcript_194992
GO:0061025	P:membrane_fusion	3	1.68666e-08	Transcript_023676;Transcript_087040;Transcript_168591
GO:0048477	P:oogenesis	3	1.68666e-08	Transcript_188701;Transcript_210991;Transcript_217583
GO:0042493	P:response_to_drug	2	1.84936e-08	Transcript_021257;Transcript_217083
GO:0008143	F:poly(A)_binding	2	1.84936e-08	Transcript_026764;Transcript_065762
GO:0010214	P:seed_coat_development	2	1.84936e-08	Transcript_044861;Transcript_144277
ko04391	Hippo_signaling_pathway_-_fly	4	1.99471e-08	Transcript_015425;Transcript_123266;Transcript_186849;Transcript_226800
ko00590	Arachidonic_acid_metabolism	4	1.99471e-08	Transcript_017329;Transcript_120546;Transcript_154408;Transcript_226282
GO:0030036	P:actin_cytoskeleton_organization	4	1.99471e-08	Transcript_012807;Transcript_222325;Transcript_234088;Transcript_238919
GO:0000045	P:autophagosome_assembly	5	2.05472e-08	Transcript_015783;Transcript_087040;Transcript_168591;Transcript_174990;Transcript_242610
ko05322	Systemic_lupus_erythematosus	5	2.05472e-08	Transcript_006849;Transcript_015927;Transcript_031079;Transcript_033816;Transcript_191863
GO:0010043	P:response_to_zinc_ion	5	2.05472e-08	Transcript_011264;Transcript_035390;Transcript_131551;Transcript_157859;Transcript_230751
GO:0032040	C:small-subunit_processome	6	2.11044e-08	Transcript_003601;Transcript_104913;Transcript_129702;Transcript_205205;Transcript_229956;Transcript_239729
GO:0008762	F:UDP-N-acetylmuramate_dehydrogenase_activity	5	2.21268e-08	Transcript_024129;Transcript_042960;Transcript_047156;Transcript_133357;Transcript_201752
GO:0009834	P:plant-type_secondary_cell_wall_biogenesis	5	2.21268e-08	Transcript_006557;Transcript_013942;Transcript_027303;Transcript_122101;Transcript_149060
GO:0009825	P:multidimensional_cell_growth	5	2.21268e-08	Transcript_011266;Transcript_188104;Transcript_196215;Transcript_229566;Transcript_243720
GO:0004713	F:protein_tyrosine_kinase_activity	3	2.3994e-08	Transcript_012807;Transcript_223474;Transcript_236330
GO:0016459	C:myosin_complex_	3	2.3994e-08	Transcript_017736;Transcript_042212;Transcript_191165
ko04712	Circadian_rhythm_-_plant	3	2.3994e-08	Transcript_034660;Transcript_091774;Transcript_143265
GO:0009089	P:lysine_biosynthetic_process_via_diaminopimelate	2	2.65123e-08	Transcript_045644;Transcript_157295
GO:0009086	P:methionine_biosynthetic_process	4	2.82344e-08	Transcript_000056;Transcript_045644;Transcript_229104;Transcript_234396
GO:0032508	P:DNA_duplex_unwinding	6	2.93807e-08	Transcript_013970;Transcript_023060;Transcript_041712;Transcript_071405;Transcript_090284;Transcript_155807
GO:0005801	C:cis-Golgi_network_	3	3.41485e-08	Transcript_001104;Transcript_015783;Transcript_089868
GO:0007267	P:cell-cell_signaling	3	3.41485e-08	Transcript_177859;Transcript_202863;Transcript_224656
GO:0009556	P:microsporogenesis	3	3.41485e-08	Transcript_105933;Transcript_154200;Transcript_155810
GO:0010027	P:thylakoid_membrane_organization	3	3.41485e-08	Transcript_006334;Transcript_016146;Transcript_187753
GO:0009741	P:response_to_brassinosteroid	2	3.80238e-08	Transcript_074557;Transcript_107140
GO:0071897	P:DNA_biosynthetic_process	2	3.80238e-08	Transcript_196318;Transcript_222943
ko05133	Pertussis	2	3.80238e-08	Transcript_019534;Transcript_199469
GO:0003779	F:actin_binding_	4	3.9982e-08	Transcript_081381;Transcript_154200;Transcript_217583;Transcript_225114
ko00920	Sulfur_metabolism	5	3.99881e-08	Transcript_019778;Transcript_034344;Transcript_216545;Transcript_218059;Transcript_243351
GO:0006352	P:DNA-templated_transcription,_initiation	5	3.99881e-08	Transcript_005845;Transcript_040271;Transcript_152118;Transcript_204709;Transcript_214254
GO:0000155	F:phosphorelay_sensor_kinase_activity	5	3.99881e-08	Transcript_020405;Transcript_109012;Transcript_196770;Transcript_226660;Transcript_237130
GO:0016485	P:protein_processing	6	4.09255e-08	Transcript_022952;Transcript_039672;Transcript_156977;Transcript_158348;Transcript_158550;Transcript_242959
GO:0016023	C:cytoplasmic_membrane-bounded_vesicle	3	4.86213e-08	Transcript_015818;Transcript_047156;Transcript_179106
GO:0000103	P:sulfate_assimilation	4	5.24842e-08	Transcript_014604;Transcript_034344;Transcript_037644;Transcript_156926
GO:0006754	P:ATP_biosynthetic_process	2	5.45556e-08	Transcript_042963;Transcript_134155
GO:0009654	C:photosystem_II_oxygen_evolving_complex	2	5.45556e-08	Transcript_024497;Transcript_079322
ko04670	Leukocyte_transendothelial_migration	2	5.45556e-08	Transcript_113548;Transcript_123266
GO:0007346	P:regulation_of_mitotic_cell_cycle	4	5.66402e-08	Transcript_012506;Transcript_022653;Transcript_154573;Transcript_229005
GO:0010118	P:stomatal_movement	3	6.92559e-08	Transcript_023102;Transcript_033045;Transcript_202542
ko04214	Apoptosis_-_fly	3	6.92559e-08	Transcript_020236;Transcript_145917;Transcript_233284
GO:0048511	P:rhythmic_process	4	7.35476e-08	Transcript_017450;Transcript_034016;Transcript_096084;Transcript_190763
ko04961	Endocrine_and_other_factor-regulated_calcium_reabsorption	4	7.35476e-08	Transcript_027502;Transcript_043468;Transcript_101433;Transcript_185131
GO:0008353	F:RNA_polymerase_II_carboxy-terminal_domain_kinase_activity	4	7.35476e-08	Transcript_000724;Transcript_004963;Transcript_021966;Transcript_028959
ko02010	ABC_transporters	5	7.7994e-08	Transcript_021257;Transcript_031605;Transcript_200150;Transcript_219033;Transcript_222312
GO:0006122	P:mitochondrial_electron_transport,_ubiquinol_to_cytochrome_c	2	7.83055e-08	Transcript_022952;Transcript_038425
GO:0030131	C:clathrin_adaptor_complex_	2	7.83055e-08	Transcript_101433;Transcript_187119
GO:0032197	P:transposition,_RNA-mediated	2	7.83055e-08	Transcript_130853;Transcript_222943
GO:0006289	P:nucleotide-excision_repair	6	7.95319e-08	Transcript_015798;Transcript_021735;Transcript_037500;Transcript_142487;Transcript_165796;Transcript_197824
GO:0008219	P:cell_death	3	9.1646e-08	Transcript_145272;Transcript_199534;Transcript_202685
GO:0006406	P:mRNA_export_from_nucleus	3	9.1646e-08	Transcript_149744;Transcript_159255;Transcript_220063
ko05416	Viral_myocarditis	3	9.1646e-08	Transcript_113548;Transcript_123266;Transcript_234158
GO:0009695	P:jasmonic_acid_biosynthetic_process	3	9.1646e-08	Transcript_069110;Transcript_079374;Transcript_230274
GO:0015079	F:potassium_ion_transmembrane_transporter_activity	3	9.1646e-08	Transcript_029745;Transcript_040274;Transcript_189378
GO:0005578	C:proteinaceous_extracellular_matrix	3	9.1646e-08	Transcript_014973;Transcript_156289;Transcript_197673
GO:0023014	P:signal_transduction_by_protein_phosphorylation	3	9.86852e-08	Transcript_020405;Transcript_196770;Transcript_226660
GO:0005732	C:small_nucleolar_ribonucleoprotein_complex	3	9.86852e-08	Transcript_003601;Transcript_086503;Transcript_212567
GO:0004003	F:ATP-dependent_DNA_helicase_activity	3	9.86852e-08	Transcript_023060;Transcript_071405;Transcript_090284
GO:0009881	F:photoreceptor_activity	4	1.03117e-07	Transcript_043402;Transcript_109012;Transcript_194992;Transcript_237130
GO:0009788	P:negative_regulation_of_abscisic_acid-activated_signaling_pathway	4	1.03117e-07	Transcript_024005;Transcript_145272;Transcript_156161;Transcript_224727
GO:0007155	P:cell_adhesion	4	1.03117e-07	Transcript_079344;Transcript_122035;Transcript_233284;Transcript_236296
GO:0007031	P:peroxisome_organization	4	1.03117e-07	Transcript_021257;Transcript_082198;Transcript_207612;Transcript_237775
GO:0016746	F:transferase_activity,_transferring_acyl_groups	4	1.03117e-07	Transcript_018802;Transcript_034176;Transcript_098438;Transcript_191437
GO:0008601	F:protein_phosphatase_type_2A_regulator_activity	5	1.0901e-07	Transcript_018791;Transcript_023274;Transcript_033378;Transcript_093206;Transcript_128635
GO:0090305	P:nucleic_acid_phosphodiester_bond_hydrolysis	5	1.0901e-07	Transcript_016657;Transcript_170329;Transcript_202654;Transcript_227802;Transcript_238693
GO:0042147	P:retrograde_transport,_endosome_to_Golgi	6	1.1095e-07	Transcript_015116;Transcript_016567;Transcript_039015;Transcript_044539;Transcript_161644;Transcript_206246
GO:0010102	P:lateral_root_morphogenesis_	2	1.12436e-07	Transcript_227686;Transcript_237366
GO:0010229	P:inflorescence_development	2	1.12436e-07	Transcript_022653;Transcript_154573
GO:0004518	F:nuclease_activity	2	1.12436e-07	Transcript_023704;Transcript_028833
ko04623	Cytosolic_DNA-sensing_pathway	3	1.29193e-07	Transcript_012987;Transcript_093018;Transcript_150478
GO:0009532	C:plastid_stroma	3	1.29193e-07	Transcript_035318;Transcript_047691;Transcript_204604
GO:0003684	F:damaged_DNA_binding	8	1.30972e-07	Transcript_015798;Transcript_020776;Transcript_021735;Transcript_142487;Transcript_165796;Transcript_172646;Transcript_197824;Transcript_228895
GO:0097502	P:mannosylation	2	1.48246e-07	Transcript_155240;Transcript_179976
GO:0000422	P:mitochondrion_degradation	2	1.48246e-07	Transcript_168591;Transcript_174990
GO:0009933	P:meristem_structural_organization	2	1.48246e-07	Transcript_096084;Transcript_182308
GO:0016791	F:phosphatase_activity	2	1.615e-07	Transcript_120546;Transcript_172102
GO:0004535	F:poly(A)-specific_ribonuclease_activity	2	1.615e-07	Transcript_009730;Transcript_016657
GO:0010584	P:pollen_exine_formation	8	1.80699e-07	Transcript_025189;Transcript_027303;Transcript_057799;Transcript_105933;Transcript_131936;Transcript_153953;Transcript_197038;Transcript_220227
GO:0006413	P:translational_initiation	8	1.80699e-07	Transcript_012262;Transcript_016560;Transcript_026774;Transcript_031558;Transcript_043594;Transcript_136358;Transcript_180586;Transcript_224747
GO:0009986	C:cell_surface_	3	1.82207e-07	Transcript_006795;Transcript_039672;Transcript_079344
GO:0006094	P:gluconeogenesis	3	1.82207e-07	Transcript_014114;Transcript_016946;Transcript_080413
GO:0000159	C:protein_phosphatase_type_2A_complex	4	2.03e-07	Transcript_015425;Transcript_023274;Transcript_093206;Transcript_128635
GO:0070417	P:cellular_response_to_cold	2	2.10745e-07	Transcript_095486;Transcript_170021
GO:0030048	P:actin_filament-based_movement	2	2.10745e-07	Transcript_010380;Transcript_042212
GO:0071472	P:cellular_response_to_salt_stress	2	2.10745e-07	Transcript_188960;Transcript_229385
GO:0010087	P:phloem_or_xylem_histogenesis	6	2.77797e-07	Transcript_019743;Transcript_061518;Transcript_149776;Transcript_182308;Transcript_218673;Transcript_243850
ko04611	Platelet_activation	4	2.8503e-07	Transcript_013342;Transcript_031338;Transcript_079344;Transcript_123266
GO:0009423	P:chorismate_biosynthetic_process	5	2.98484e-07	Transcript_010836;Transcript_042248;Transcript_090733;Transcript_109203;Transcript_169264
ko04710	Circadian_rhythm	5	2.98484e-07	Transcript_028007;Transcript_052856;Transcript_061518;Transcript_083204;Transcript_149776
GO:0004022	F:alcohol_dehydrogenase_(NAD)_activity	2	2.99722e-07	Transcript_026193;Transcript_104646
GO:0010267	P:production_of_ta-siRNAs_involved_in_RNA_interference	2	2.99722e-07	Transcript_220063;Transcript_235950
GO:0010073	P:meristem_maintenance	2	2.99722e-07	Transcript_042145;Transcript_044881
GO:0045735	F:nutrient_reservoir_activity	3	3.62929e-07	Transcript_003701;Transcript_030024;Transcript_151165
GO:0010315	P:auxin_efflux	3	3.62929e-07	Transcript_031605;Transcript_080441;Transcript_222312
GO:0009765	P:photosynthesis,_light_harvesting	7	3.65299e-07	Transcript_005179;Transcript_018416;Transcript_038206;Transcript_145533;Transcript_152342;Transcript_155928;Transcript_201460
GO:0042470	C:melanosome	4	4.00388e-07	Transcript_003016;Transcript_193507;Transcript_208090;Transcript_242079
GO:0010305	P:leaf_vascular_tissue_pattern_formation	4	4.00388e-07	Transcript_019743;Transcript_182308;Transcript_188960;Transcript_218673
GO:0000079	P:regulation_of_cyclin-dependent_protein_serine/threonine_kinase_activity	5	4.17931e-07	Transcript_003302;Transcript_016024;Transcript_034661;Transcript_143778;Transcript_195854
GO:0007338	P:single_fertilization	2	4.26452e-07	Transcript_239941;Transcript_242855
GO:0098655	P:cation_transmembrane_transport	2	4.26452e-07	Transcript_198098;Transcript_234293
GO:0012507	C:ER_to_Golgi_transport_vesicle_membrane	2	4.26452e-07	Transcript_039015;Transcript_161644
GO:0048268	P:clathrin_coat_assembly	2	4.26452e-07	Transcript_033018;Transcript_178285
ko04976	Bile_secretion	3	5.12556e-07	Transcript_031605;Transcript_200150;Transcript_222312
ko00983	Drug_metabolism_-_other_enzymes	3	5.12556e-07	Transcript_025874;Transcript_027691;Transcript_225771
GO:0009644	P:response_to_high_light_intensity	6	5.30709e-07	Transcript_025598;Transcript_042062;Transcript_139661;Transcript_202071;Transcript_204443;Transcript_225582
GO:0016298	F:lipase_activity	5	5.48264e-07	Transcript_017874;Transcript_041988;Transcript_042206;Transcript_221871;Transcript_233880
GO:0008285	P:negative_regulation_of_cell_proliferation	5	5.48264e-07	Transcript_011878;Transcript_088645;Transcript_121303;Transcript_192644;Transcript_240050
GO:0006071	P:glycerol_metabolic_process	4	5.62672e-07	Transcript_005986;Transcript_018502;Transcript_059666;Transcript_149716
GO:0000272	P:polysaccharide_catabolic_process	5	5.85385e-07	Transcript_024035;Transcript_077638;Transcript_096837;Transcript_149601;Transcript_162281
GO:0031593	F:polyubiquitin_binding	2	6.07025e-07	Transcript_037498;Transcript_165796
GO:0030234	F:enzyme_regulator_activity	2	6.07025e-07	Transcript_191303;Transcript_226114
GO:0030245	P:cellulose_catabolic_process	2	6.07025e-07	Transcript_014798;Transcript_031290
GO:0003730	F:mRNA_3'-UTR_binding	2	6.07025e-07	Transcript_023212;Transcript_204561
GO:0009060	P:aerobic_respiration	2	6.07025e-07	Transcript_022952;Transcript_036083
GO:0080092	P:regulation_of_pollen_tube_growth	2	6.07025e-07	Transcript_152118;Transcript_155810
GO:0031347	P:regulation_of_defense_response	3	7.2418e-07	Transcript_031434;Transcript_122229;Transcript_199186
GO:0007283	P:spermatogenesis	4	7.91045e-07	Transcript_006542;Transcript_014114;Transcript_022100;Transcript_184894
GO:0016829	F:lyase_activity	4	7.91045e-07	Transcript_018331;Transcript_034054;Transcript_071931;Transcript_090030
GO:0015629	C:actin_cytoskeleton_	2	8.64424e-07	Transcript_019534;Transcript_197714
GO:0008810	F:cellulase_activity	2	8.64424e-07	Transcript_014798;Transcript_031290
GO:0005762	C:mitochondrial_large_ribosomal_subunit_	2	8.64424e-07	Transcript_137860;Transcript_193305
GO:0006360	P:transcription_from_RNA_polymerase_I_promoter	2	8.64424e-07	Transcript_093018;Transcript_150478
ko00780	Biotin_metabolism	3	1.0236e-06	Transcript_008095;Transcript_042372;Transcript_202366
GO:0005315	F:inorganic_phosphate_transmembrane_transporter_activity	3	1.0236e-06	Transcript_085884;Transcript_231533;Transcript_235192
GO:0016671	F:oxidoreductase_activity,_acting_on_a_sulfur_group_of_donors,_disulfide_as_acceptor	4	1.11251e-06	Transcript_006334;Transcript_014604;Transcript_037644;Transcript_156926
GO:0007131	P:reciprocal_meiotic_recombination	2	1.23147e-06	Transcript_172646;Transcript_228895
GO:0005545	F:1-phosphatidylinositol_binding	2	1.23147e-06	Transcript_033018;Transcript_178285
GO:0032403	F:protein_complex_binding	2	1.23147e-06	Transcript_040180;Transcript_184894
GO:0004565	F:beta-galactosidase_activity	2	1.23147e-06	Transcript_005053;Transcript_223483
GO:0009097	P:isoleucine_biosynthetic_process	2	1.23147e-06	Transcript_037064;Transcript_041676
GO:0000922	C:spindle_pole	3	1.44737e-06	Transcript_002427;Transcript_029875;Transcript_157447
GO:0009228	P:thiamine_biosynthetic_process	3	1.44737e-06	Transcript_071931;Transcript_090030;Transcript_226851
GO:0000281	P:mitotic_cytokinesis	3	1.44737e-06	Transcript_175416;Transcript_199471;Transcript_229005
GO:0006995	P:cellular_response_to_nitrogen_starvation	3	1.44737e-06	Transcript_167228;Transcript_168591;Transcript_174990
GO:0030515	F:snoRNA_binding	3	1.44737e-06	Transcript_003601;Transcript_086503;Transcript_129702
ko05142	Chagas_disease_(American_trypanosomiasis)	5	1.45987e-06	Transcript_015425;Transcript_029746;Transcript_149814;Transcript_195425;Transcript_199469
GO:0019773	C:proteasome_core_complex,_alpha-subunit_complex	4	1.47272e-06	Transcript_002519;Transcript_008163;Transcript_131551;Transcript_213671
GO:0045261	C:proton-transporting_ATP_synthase_complex,_catalytic_core_F(1)	4	1.5651e-06	Transcript_023555;Transcript_026611;Transcript_043185;Transcript_201255
GO:0031146	P:SCF-dependent_proteasomal_ubiquitin-dependent_protein_catabolic_process	4	1.5651e-06	Transcript_023102;Transcript_033045;Transcript_083204;Transcript_202542
GO:0009630	P:gravitropism	2	1.75507e-06	Transcript_028447;Transcript_181757
ko04621	NOD-like_receptor_signaling_pathway	2	1.75507e-06	Transcript_003016;Transcript_110097
GO:0000175	F:3'-5'-exoribonuclease_activity	2	1.75507e-06	Transcript_016657;Transcript_183290
GO:0005736	C:DNA-directed_RNA_polymerase_I_complex_	2	1.75507e-06	Transcript_093018;Transcript_150478
GO:0000790	C:nuclear_chromatin	2	1.75507e-06	Transcript_041712;Transcript_139660
GO:0006278	P:RNA-dependent_DNA_replication	2	1.75507e-06	Transcript_158012;Transcript_222943
GO:0005815	C:microtubule_organizing_center	5	2.02528e-06	Transcript_015116;Transcript_033017;Transcript_044539;Transcript_189533;Transcript_205336
GO:0004806	F:triglyceride_lipase_activity_	3	2.04732e-06	Transcript_055067;Transcript_108555;Transcript_226282
GO:0051017	P:actin_filament_bundle_assembly	3	2.04732e-06	Transcript_020276;Transcript_226013;Transcript_232900
GO:0004523	F:RNA-DNA_hybrid_ribonuclease_activity	3	2.04732e-06	Transcript_008432;Transcript_016415;Transcript_222943
GO:0016747	F:transferase_activity,_transferring_acyl_groups_other_than_amino-acyl_groups	4	2.04912e-06	Transcript_005449;Transcript_043237;Transcript_155818;Transcript_160954
GO:0009749	P:response_to_glucose	4	2.04912e-06	Transcript_004493;Transcript_136358;Transcript_180358;Transcript_223119
GO:0000815	C:ESCRT_III_complex_	2	2.50224e-06	Transcript_188871;Transcript_222407
GO:0048765	P:root_hair_cell_differentiation	2	2.50224e-06	Transcript_095911;Transcript_188104
GO:0008094	F:DNA-dependent_ATPase_activity	6	2.55673e-06	Transcript_013970;Transcript_022196;Transcript_139660;Transcript_172646;Transcript_215297;Transcript_228895
GO:0008408	F:3'-5'_exonuclease_activity	4	2.85235e-06	Transcript_016657;Transcript_170329;Transcript_224027;Transcript_238693
GO:0022900	P:electron_transport_chain	8	2.86901e-06	Transcript_005630;Transcript_023779;Transcript_030330;Transcript_033063;Transcript_050536;Transcript_169480;Transcript_235200;Transcript_238422
GO:0016363	C:nuclear_matrix	3	2.89688e-06	Transcript_149508;Transcript_227686;Transcript_236505
GO:0042127	P:regulation_of_cell_proliferation	3	2.89688e-06	Transcript_017225;Transcript_156161;Transcript_212191
GO:0000381	P:regulation_of_alternative_mRNA_splicing,_via_spliceosome	2	3.56878e-06	Transcript_158530;Transcript_195453
GO:0045263	C:proton-transporting_ATP_synthase_complex,_coupling_factor_F(o)	2	3.56878e-06	Transcript_042963;Transcript_141694
GO:0000902	P:cell_morphogenesis	2	3.56878e-06	Transcript_079344;Transcript_238919
GO:0050790	P:regulation_of_catalytic_activity	2	3.56878e-06	Transcript_087040;Transcript_178580
GO:0006378	P:mRNA_polyadenylation	5	3.90245e-06	Transcript_011878;Transcript_013970;Transcript_025855;Transcript_222390;Transcript_222440
GO:0009631	P:cold_acclimation	5	3.90245e-06	Transcript_008095;Transcript_019060;Transcript_023779;Transcript_025797;Transcript_226817
GO:0043085	P:positive_regulation_of_catalytic_activity	4	3.97209e-06	Transcript_014604;Transcript_016571;Transcript_037644;Transcript_100859
GO:0048527	P:lateral_root_development	4	3.97209e-06	Transcript_038402;Transcript_159282;Transcript_201458;Transcript_209211
GO:0006189	P:'de_novo'_IMP_biosynthetic_process	3	4.10015e-06	Transcript_042446;Transcript_209045;Transcript_228479
GO:0003712	F:transcription_cofactor_activity	3	4.10015e-06	Transcript_002021;Transcript_054599;Transcript_098438
GO:0004427	F:inorganic_diphosphatase_activity_	3	4.10015e-06	Transcript_172102;Transcript_223426;Transcript_230419
GO:0010103	P:stomatal_complex_morphogenesis	3	4.10015e-06	Transcript_022653;Transcript_154573;Transcript_222241
ko02020	Two-component_system	3	4.10015e-06	Transcript_017917;Transcript_018746;Transcript_038425
GO:0055072	P:iron_ion_homeostasis	3	4.10015e-06	Transcript_016473;Transcript_102614;Transcript_225726
GO:0050897	F:cobalt_ion_binding	7	4.35047e-06	Transcript_002215;Transcript_010828;Transcript_023779;Transcript_042883;Transcript_121426;Transcript_141694;Transcript_211261
GO:0007010	P:cytoskeleton_organization	2	5.09159e-06	Transcript_016436;Transcript_238919
GO:0036459	F:ubiquitinyl_hydrolase_activity	2	5.09159e-06	Transcript_088907;Transcript_096377
GO:0005838	C:proteasome_regulatory_particle	2	5.09159e-06	Transcript_078776;Transcript_226114
GO:0006383	P:transcription_from_RNA_polymerase_III_promoter	3	5.40643e-06	Transcript_012987;Transcript_093018;Transcript_150478
GO:0005102	F:receptor_binding	3	5.40643e-06	Transcript_034054;Transcript_059959;Transcript_120546
GO:0010329	F:auxin_efflux_transmembrane_transporter_activity	3	5.40643e-06	Transcript_031605;Transcript_080441;Transcript_222312
GO:0005666	C:DNA-directed_RNA_polymerase_III_complex	3	5.40643e-06	Transcript_012987;Transcript_093018;Transcript_150478
GO:0051321	P:meiotic_cell_cycle	4	5.53357e-06	Transcript_003302;Transcript_015783;Transcript_196412;Transcript_240360
GO:0030570	F:pectate_lyase_activity	3	5.80462e-06	Transcript_042628;Transcript_067062;Transcript_242246
GO:0042752	P:regulation_of_circadian_rhythm	3	5.80462e-06	Transcript_061518;Transcript_096084;Transcript_149776
GO:0016853	F:isomerase_activity	3	5.80462e-06	Transcript_020313;Transcript_201020;Transcript_233175
GO:0032147	P:activation_of_protein_kinase_activity	3	5.80462e-06	Transcript_012506;Transcript_022653;Transcript_154573
GO:0006614	P:SRP-dependent_cotranslational_protein_targeting_to_membrane	3	5.80462e-06	Transcript_026774;Transcript_217083;Transcript_232885
GO:0015095	F:magnesium_ion_transmembrane_transporter_activity	7	5.96301e-06	Transcript_035629;Transcript_081763;Transcript_095467;Transcript_170559;Transcript_198098;Transcript_233014;Transcript_234293
GO:0051015	F:actin_filament_binding	6	6.58535e-06	Transcript_020276;Transcript_154200;Transcript_157618;Transcript_192590;Transcript_217583;Transcript_226013
GO:0006402	P:mRNA_catabolic_process	2	7.26638e-06	Transcript_183290;Transcript_214662
GO:0051538	F:3_iron,_4_sulfur_cluster_binding	2	7.26638e-06	Transcript_028047;Transcript_153355
ko00790	Folate_biosynthesis	2	7.26638e-06	Transcript_028080;Transcript_099844
GO:0009790	P:embryo_development	2	7.26638e-06	Transcript_187629;Transcript_213907
ko05020	Prion_diseases	2	7.26638e-06	Transcript_067992;Transcript_208901
GO:0034613	P:cellular_protein_localization	3	7.57145e-06	Transcript_015977;Transcript_016377;Transcript_158395
GO:0051213	F:dioxygenase_activity	4	7.7117e-06	Transcript_006542;Transcript_025442;Transcript_074557;Transcript_226393
GO:0015693	P:magnesium_ion_transport	6	9.03425e-06	Transcript_035629;Transcript_081763;Transcript_095467;Transcript_198098;Transcript_233014;Transcript_234293
GO:0009944	P:polarity_specification_of_adaxial/abaxial_axis	8	9.17691e-06	Transcript_023646;Transcript_042145;Transcript_043478;Transcript_092175;Transcript_155267;Transcript_227776;Transcript_238051;Transcript_240406
GO:0051707	P:response_to_other_organism	2	1.03729e-05	Transcript_042206;Transcript_159124
GO:0000418	C:DNA-directed_RNA_polymerase_IV_complex	2	1.03729e-05	Transcript_093018;Transcript_177859
GO:0048280	P:vesicle_fusion_with_Golgi_apparatus	2	1.03729e-05	Transcript_039015;Transcript_161644
GO:0042335	P:cuticle_development	2	1.03729e-05	Transcript_114532;Transcript_188701
GO:0035435	P:phosphate_ion_transmembrane_transport	2	1.03729e-05	Transcript_085884;Transcript_215202
GO:0006896	P:Golgi_to_vacuole_transport	2	1.03729e-05	Transcript_039015;Transcript_161644
GO:0048278	P:vesicle_docking	2	1.03729e-05	Transcript_193394;Transcript_234643
GO:0042023	P:DNA_endoreduplication	2	1.03729e-05	Transcript_016237;Transcript_027192
GO:0004315	F:3-oxoacyl-acyl-carrier-protein_synthase_activity	2	1.03729e-05	Transcript_008095;Transcript_242079
GO:0010193	P:response_to_ozone	5	1.04617e-05	Transcript_007304;Transcript_027279;Transcript_095793;Transcript_203446;Transcript_227686
GO:0016310	P:phosphorylation	7	1.06055e-05	Transcript_034344;Transcript_072587;Transcript_172211;Transcript_202654;Transcript_222390;Transcript_227802;Transcript_228794
GO:0046274	P:lignin_catabolic_process	3	1.06074e-05	Transcript_018514;Transcript_035581;Transcript_235120
GO:0052716	F:hydroquinone:oxygen_oxidoreductase_activity	3	1.06074e-05	Transcript_018514;Transcript_035581;Transcript_235120
GO:0032543	P:mitochondrial_translation	4	1.07507e-05	Transcript_016986;Transcript_126398;Transcript_156647;Transcript_193305
GO:0004527	F:exonuclease_activity	4	1.07507e-05	Transcript_008432;Transcript_031480;Transcript_032315;Transcript_240360
GO:0004712	F:protein_serine/threonine/tyrosine_kinase_activity	9	1.3659e-05	Transcript_007427;Transcript_014265;Transcript_015977;Transcript_019961;Transcript_037105;Transcript_053567;Transcript_081569;Transcript_145272;Transcript_159854
ko00591	Linoleic_acid_metabolism	2	1.37084e-05	Transcript_226282;Transcript_230274
GO:0051568	P:histone_H3-K4_methylation	2	1.37084e-05	Transcript_183851;Transcript_199156
GO:0016024	P:CDP-diacylglycerol_biosynthetic_process	2	1.37084e-05	Transcript_000605;Transcript_013672
GO:0072686	C:mitotic_spindle	2	1.37084e-05	Transcript_018082;Transcript_228720
GO:0000421	C:autophagosome_membrane_	2	1.37084e-05	Transcript_168591;Transcript_242610
GO:2000024	P:regulation_of_leaf_development	7	1.43884e-05	Transcript_018802;Transcript_023646;Transcript_027836;Transcript_034176;Transcript_042145;Transcript_155267;Transcript_240406
GO:0002181	P:cytoplasmic_translation	2	1.48108e-05	Transcript_044835;Transcript_125114
GO:0072593	P:reactive_oxygen_species_metabolic_process	2	1.48108e-05	Transcript_120546;Transcript_198631
GO:0030127	C:COPII_vesicle_coat_	3	1.4866e-05	Transcript_043014;Transcript_222954;Transcript_223956
GO:0005978	P:glycogen_biosynthetic_process	3	1.4866e-05	Transcript_008643;Transcript_040039;Transcript_041688
GO:0044804	P:nucleophagy	3	1.4866e-05	Transcript_015783;Transcript_168591;Transcript_174990
GO:0006909	P:phagocytosis	8	1.69134e-05	Transcript_012807;Transcript_015835;Transcript_026611;Transcript_033017;Transcript_043185;Transcript_156448;Transcript_210991;Transcript_238919
GO:0007005	P:mitochondrion_organization	5	1.8707e-05	Transcript_006675;Transcript_038402;Transcript_192279;Transcript_198760;Transcript_244675
GO:0004709	F:MAP_kinase_kinase_kinase_activity	5	1.8707e-05	Transcript_012506;Transcript_022653;Transcript_145272;Transcript_154573;Transcript_169370
GO:0010628	P:positive_regulation_of_gene_expression	5	1.8707e-05	Transcript_006557;Transcript_088645;Transcript_120546;Transcript_240050;Transcript_242736
GO:0008061	F:chitin_binding	5	1.8707e-05	Transcript_077638;Transcript_096837;Transcript_149601;Transcript_208164;Transcript_217012
GO:0051117	F:ATPase_binding	2	1.93679e-05	Transcript_087040;Transcript_232386
ko00072	Synthesis_and_degradation_of_ketone_bodies	2	1.93679e-05	Transcript_016624;Transcript_021346
GO:0010310	P:regulation_of_hydrogen_peroxide_metabolic_process	2	1.93679e-05	Transcript_012060;Transcript_042206
ko04730	Long-term_depression	2	1.93679e-05	Transcript_015425;Transcript_031338
GO:0008948	F:oxaloacetate_decarboxylase_activity	2	1.93679e-05	Transcript_193243;Transcript_236323
GO:0000228	C:nuclear_chromosome	3	2.08412e-05	Transcript_172646;Transcript_208085;Transcript_228895
GO:0010541	P:acropetal_auxin_transport	3	2.08412e-05	Transcript_031605;Transcript_159282;Transcript_222312
GO:0008340	P:determination_of_adult_lifespan	4	2.091e-05	Transcript_039672;Transcript_155807;Transcript_186849;Transcript_233284
GO:0009932	P:cell_tip_growth	4	2.091e-05	Transcript_033984;Transcript_095911;Transcript_183278;Transcript_229566
ko00511	Other_glycan_degradation	4	2.091e-05	Transcript_005053;Transcript_041445;Transcript_235663;Transcript_244534
ko00750	Vitamin_B6_metabolism	7	2.65108e-05	Transcript_040273;Transcript_072587;Transcript_162588;Transcript_172102;Transcript_172211;Transcript_209738;Transcript_223426
GO:0007568	P:aging	2	2.73736e-05	Transcript_031559;Transcript_153902
GO:0009231	P:riboflavin_biosynthetic_process	2	2.73736e-05	Transcript_013777;Transcript_204443
ko00740	Riboflavin_metabolism	2	2.73736e-05	Transcript_013777;Transcript_237396
GO:0006644	P:phospholipid_metabolic_process	2	2.73736e-05	Transcript_167693;Transcript_235785
GO:0048653	P:anther_development	2	2.73736e-05	Transcript_020142;Transcript_035963
GO:0004467	F:long-chain_fatty_acid-CoA_ligase_activity	2	2.73736e-05	Transcript_026760;Transcript_233892
GO:0004739	F:pyruvate_dehydrogenase_(acetyl-transferring)_activity	2	2.73736e-05	Transcript_007938;Transcript_029327
GO:0070402	F:NADPH_binding	4	2.917e-05	Transcript_017329;Transcript_040273;Transcript_162588;Transcript_242079
GO:0010492	P:maintenance_of_shoot_apical_meristem_identity	3	2.92265e-05	Transcript_153091;Transcript_212191;Transcript_222148
GO:0044732	C:mitotic_spindle_pole_body_	3	2.92265e-05	Transcript_018920;Transcript_023060;Transcript_167806
GO:0060548	P:negative_regulation_of_cell_death	3	2.92265e-05	Transcript_100502;Transcript_138761;Transcript_139813
GO:0033179	C:proton-transporting_V-type_ATPase,_V0_domain	4	3.84477e-05	Transcript_009757;Transcript_080670;Transcript_168752;Transcript_230521
GO:0045899	P:positive_regulation_of_RNA_polymerase_II_transcriptional_preinitiation_complex_assembly	2	3.87017e-05	Transcript_234735;Transcript_241708
GO:0009266	P:response_to_temperature_stimulus	2	3.87017e-05	Transcript_015927;Transcript_020324
GO:0006270	P:DNA_replication_initiation	2	3.87017e-05	Transcript_036736;Transcript_041712
GO:0016717	F:oxidoreductase_activity,_acting_on_paired_donors,_with_oxidation_of_a_pair_of_donors_resulting_in_the_reduction_of_molecular_oxygen_to_two_molecules_of_water	2	3.87017e-05	Transcript_176190;Transcript_199362
GO:0004872	F:receptor_activity	6	4.40608e-05	Transcript_020405;Transcript_030348;Transcript_152339;Transcript_196770;Transcript_226660;Transcript_229938
GO:0000160	P:phosphorelay_signal_transduction_system	6	4.40608e-05	Transcript_017450;Transcript_020405;Transcript_039721;Transcript_196770;Transcript_226660;Transcript_228794
GO:0005685	C:U1_snRNP	5	4.86897e-05	Transcript_006849;Transcript_033816;Transcript_051286;Transcript_191863;Transcript_240682
GO:0006032	P:chitin_catabolic_process	4	5.30536e-05	Transcript_077638;Transcript_096837;Transcript_149601;Transcript_208164
GO:0006367	P:transcription_initiation_from_RNA_polymerase_II_promoter	4	5.30536e-05	Transcript_023060;Transcript_040271;Transcript_180390;Transcript_204709
GO:0031597	C:cytosolic_proteasome_complex_	2	5.47353e-05	Transcript_234735;Transcript_241708
GO:0046856	P:phosphatidylinositol_dephosphorylation	2	5.47353e-05	Transcript_095911;Transcript_188960
GO:0098656	P:anion_transmembrane_transport	2	5.47353e-05	Transcript_034534;Transcript_235192
GO:0080130	F:L-phenylalanine:2-oxoglutarate_aminotransferase_activity	3	5.75163e-05	Transcript_034831;Transcript_135572;Transcript_157858
GO:0004622	F:lysophospholipase_activity	3	5.75163e-05	Transcript_011264;Transcript_035390;Transcript_157859
ko00960	Tropane,_piperidine_and_pyridine_alkaloid_biosynthesis	3	5.75163e-05	Transcript_034831;Transcript_135572;Transcript_222613
GO:0009820	P:alkaloid_metabolic_process	7	6.64111e-05	Transcript_009692;Transcript_020455;Transcript_024085;Transcript_047156;Transcript_057859;Transcript_095937;Transcript_149653
GO:0003725	F:double-stranded_RNA_binding	5	6.70013e-05	Transcript_012262;Transcript_043594;Transcript_052769;Transcript_125733;Transcript_241334
GO:0007517	P:muscle_organ_development	4	7.32273e-05	Transcript_081381;Transcript_210991;Transcript_225114;Transcript_229005
GO:0001944	P:vasculature_development	4	7.32273e-05	Transcript_093212;Transcript_163320;Transcript_189646;Transcript_193866
GO:0030976	F:thiamine_pyrophosphate_binding	4	7.32273e-05	Transcript_000852;Transcript_034054;Transcript_037155;Transcript_203816
GO:0003989	F:acetyl-CoA_carboxylase_activity	2	7.7434e-05	Transcript_233389;Transcript_235657
GO:0003872	F:6-phosphofructokinase_activity	2	7.7434e-05	Transcript_038026;Transcript_213712
GO:0080148	P:negative_regulation_of_response_to_water_deprivation	2	7.7434e-05	Transcript_209211;Transcript_239820
ko00730	Thiamine_metabolism	3	8.07056e-05	Transcript_071931;Transcript_090030;Transcript_226851
GO:0016866	F:intramolecular_transferase_activity	3	8.07056e-05	Transcript_005015;Transcript_014494;Transcript_015198
GO:0016573	P:histone_acetylation	3	8.07056e-05	Transcript_098438;Transcript_229005;Transcript_240717
GO:0006302	P:double-strand_break_repair	4	0.000101094	Transcript_031480;Transcript_037498;Transcript_196318;Transcript_240360
GO:0008540	C:proteasome_regulatory_particle,_base_subcomplex	4	0.000101094	Transcript_191303;Transcript_226114;Transcript_234735;Transcript_241708
ko00261	Monobactam_biosynthesis	2	0.000109574	Transcript_034344;Transcript_157295
GO:0015114	F:phosphate_ion_transmembrane_transporter_activity	2	0.000109574	Transcript_085884;Transcript_215202
GO:0010256	P:endomembrane_system_organization	2	0.000109574	Transcript_088132;Transcript_222019
GO:0006646	P:phosphatidylethanolamine_biosynthetic_process	2	0.000109574	Transcript_026222;Transcript_026934
GO:0017025	F:TBP-class_protein_binding	2	0.000109574	Transcript_234735;Transcript_241708
GO:0009649	P:entrainment_of_circadian_clock	2	0.000109574	Transcript_043402;Transcript_194992
GO:0042594	P:response_to_starvation	2	0.000109574	Transcript_042217;Transcript_233284
GO:0004181	F:metallocarboxypeptidase_activity	2	0.000109574	Transcript_029823;Transcript_230639
GO:0006626	P:protein_targeting_to_mitochondrion	3	0.000113253	Transcript_022952;Transcript_026708;Transcript_137810
GO:0016571	P:histone_methylation	3	0.000113253	Transcript_027488;Transcript_200038;Transcript_229005
GO:0030018	C:Z_disc	3	0.000113253	Transcript_027666;Transcript_081381;Transcript_225114
GO:0031012	C:extracellular_matrix_	3	0.000113253	Transcript_005963;Transcript_093665;Transcript_197673
GO:0043065	P:positive_regulation_of_apoptotic_process	3	0.000113253	Transcript_006795;Transcript_204893;Transcript_240050
GO:0009934	P:regulation_of_meristem_structural_organization	3	0.000113253	Transcript_009121;Transcript_156161;Transcript_212191
GO:0009561	P:megagametogenesis	3	0.000113253	Transcript_035046;Transcript_129702;Transcript_237979
GO:0000186	P:activation_of_MAPKK_activity	4	0.000139587	Transcript_012506;Transcript_022653;Transcript_145272;Transcript_154573
GO:0003714	F:transcription_corepressor_activity	4	0.000139587	Transcript_006795;Transcript_063895;Transcript_099209;Transcript_150574
GO:0051567	P:histone_H3-K9_methylation	4	0.000139587	Transcript_027488;Transcript_041692;Transcript_144160;Transcript_229005
GO:0000148	C:1,3-beta-D-glucan_synthase_complex_	4	0.000139587	Transcript_061772;Transcript_149561;Transcript_155810;Transcript_194193
ko00950	Isoquinoline_alkaloid_biosynthesis	4	0.000139587	Transcript_034831;Transcript_135572;Transcript_198102;Transcript_222613
GO:0006075	P:(1->3)-beta-D-glucan_biosynthetic_process	4	0.000139587	Transcript_061772;Transcript_149561;Transcript_155810;Transcript_194193
GO:0003843	F:1,3-beta-D-glucan_synthase_activity	4	0.000139587	Transcript_061772;Transcript_149561;Transcript_155810;Transcript_194193
GO:0034314	P:Arp2/3_complex-mediated_actin_nucleation	3	0.000149693	Transcript_197714;Transcript_238919;Transcript_239448
GO:0019915	P:lipid_storage	3	0.000149693	Transcript_071911;Transcript_083204;Transcript_096084
GO:0006839	P:mitochondrial_transport	3	0.000149693	Transcript_002810;Transcript_084246;Transcript_206711
GO:0006002	P:fructose_6-phosphate_metabolic_process	3	0.000149693	Transcript_000223;Transcript_038026;Transcript_213712
GO:0005885	C:Arp2/3_protein_complex_	3	0.000149693	Transcript_197714;Transcript_238919;Transcript_239448
GO:0009116	P:nucleoside_metabolic_process	2	0.000155085	Transcript_014600;Transcript_189646
GO:0010252	P:auxin_homeostasis	3	0.000158924	Transcript_080441;Transcript_227776;Transcript_236452
GO:0004784	F:superoxide_dismutase_activity	3	0.000158924	Transcript_044737;Transcript_065625;Transcript_067992
GO:0046540	C:U4/U6_x_U5_tri-snRNP_complex	3	0.000158924	Transcript_043873;Transcript_182308;Transcript_212567
GO:1902183	P:regulation_of_shoot_apical_meristem_development	5	0.000174602	Transcript_009704;Transcript_023646;Transcript_042145;Transcript_155267;Transcript_240406
ko00910	Nitrogen_metabolism	5	0.000174602	Transcript_018746;Transcript_028047;Transcript_042300;Transcript_082227;Transcript_244104
GO:0000407	C:pre-autophagosomal_structure	5	0.000174602	Transcript_015783;Transcript_168591;Transcript_170081;Transcript_197462;Transcript_238103
GO:0009298	P:GDP-mannose_biosynthetic_process	4	0.000192756	Transcript_009809;Transcript_223241;Transcript_224440;Transcript_230751
GO:0010089	P:xylem_development	4	0.000192756	Transcript_005135;Transcript_093212;Transcript_163320;Transcript_235625
GO:0010105	P:negative_regulation_of_ethylene-activated_signaling_pathway	6	0.000193368	Transcript_020405;Transcript_028368;Transcript_042206;Transcript_156818;Transcript_196770;Transcript_226660
GO:0003968	F:RNA-directed_RNA_polymerase_activity	3	0.00020777	Transcript_149903;Transcript_165031;Transcript_199141
GO:0001104	F:RNA_polymerase_II_transcription_cofactor_activity	3	0.00020777	Transcript_019060;Transcript_093644;Transcript_227996
GO:0035064	F:methylated_histone_binding	3	0.00020777	Transcript_082825;Transcript_139660;Transcript_184165
GO:0033116	C:endoplasmic_reticulum-Golgi_intermediate_compartment_membrane	3	0.00020777	Transcript_014681;Transcript_184894;Transcript_222954
GO:0036402	F:proteasome-activating_ATPase_activity	2	0.000219535	Transcript_234735;Transcript_241708
GO:0000781	C:chromosome,_telomeric_region_	2	0.000219535	Transcript_023610;Transcript_044881
GO:0034707	C:chloride_channel_complex_	2	0.000219535	Transcript_043022;Transcript_062728
GO:0031595	C:nuclear_proteasome_complex	2	0.000219535	Transcript_234735;Transcript_241708
GO:0048040	F:UDP-glucuronate_decarboxylase_activity	2	0.000219535	Transcript_025190;Transcript_233387
GO:0006874	P:cellular_calcium_ion_homeostasis	2	0.000219535	Transcript_120546;Transcript_197170
GO:0008266	F:poly(U)_RNA_binding	2	0.000219535	Transcript_023301;Transcript_226817
GO:0048262	P:determination_of_dorsal/ventral_asymmetry	2	0.000219535	Transcript_012568;Transcript_181238
GO:0009688	P:abscisic_acid_biosynthetic_process	2	0.000219535	Transcript_026193;Transcript_234806
GO:0010417	P:glucuronoxylan_biosynthetic_process	2	0.000219535	Transcript_027303;Transcript_176239
GO:0009863	P:salicylic_acid_mediated_signaling_pathway	2	0.000219535	Transcript_014461;Transcript_061772
GO:0035196	P:production_of_miRNAs_involved_in_gene_silencing_by_miRNA	2	0.000219535	Transcript_052769;Transcript_241334
GO:0000156	F:phosphorelay_response_regulator_activity	5	0.000225177	Transcript_020405;Transcript_024208;Transcript_117469;Transcript_196770;Transcript_226660
GO:0004575	F:sucrose_alpha-glucosidase_activity	6	0.000262811	Transcript_017853;Transcript_023370;Transcript_064798;Transcript_109577;Transcript_165034;Transcript_199971
GO:0004568	F:chitinase_activity	4	0.000266179	Transcript_077638;Transcript_096837;Transcript_149601;Transcript_208164
GO:0005749	C:mitochondrial_respiratory_chain_complex_II,_succinate_dehydrogenase_complex_(ubiquinone)_	3	0.000288428	Transcript_089463;Transcript_098323;Transcript_222306
GO:0006464	P:cellular_protein_modification_process	3	0.000288428	Transcript_048069;Transcript_112483;Transcript_235663
GO:0006414	P:translational_elongation	3	0.000288428	Transcript_016986;Transcript_026774;Transcript_122696
GO:0006400	P:tRNA_modification	2	0.000310795	Transcript_018802;Transcript_034176
GO:0050826	P:response_to_freezing	2	0.000310795	Transcript_093601;Transcript_096084
GO:0006546	P:glycine_catabolic_process	2	0.000310795	Transcript_020553;Transcript_214102
GO:0042632	P:cholesterol_homeostasis	2	0.000310795	Transcript_084987;Transcript_120546
GO:0010333	F:terpene_synthase_activity	2	0.000310795	Transcript_077756;Transcript_239780
GO:0032880	P:regulation_of_protein_localization	2	0.000310795	Transcript_026424;Transcript_222677
GO:0009851	P:auxin_biosynthetic_process	2	0.000310795	Transcript_181018;Transcript_188188
GO:1901800	P:positive_regulation_of_proteasomal_protein_catabolic_process	2	0.000310795	Transcript_234735;Transcript_241708
GO:0008327	F:methyl-CpG_binding	2	0.000310795	Transcript_027488;Transcript_240717
GO:0010183	P:pollen_tube_guidance	2	0.000310795	Transcript_036091;Transcript_152118
GO:0034399	C:nuclear_periphery	2	0.000310795	Transcript_158395;Transcript_191303
GO:0006955	P:immune_response	4	0.000367539	Transcript_043875;Transcript_077638;Transcript_156977;Transcript_202685
GO:0019761	P:glucosinolate_biosynthetic_process	3	0.000400444	Transcript_026424;Transcript_031557;Transcript_222677
GO:0090430	F:caffeoyl-CoA:_alcohol_caffeoyl_transferase_activity	3	0.000400444	Transcript_011264;Transcript_035390;Transcript_157859
GO:0003846	F:2-acylglycerol_O-acyltransferase_activity	3	0.000400444	Transcript_011264;Transcript_035390;Transcript_157859
ko00196	Photosynthesis_-_antenna_proteins	5	0.000417327	Transcript_005179;Transcript_018416;Transcript_152342;Transcript_155928;Transcript_201460
GO:0010223	P:secondary_shoot_formation	5	0.000417327	Transcript_093212;Transcript_095790;Transcript_160849;Transcript_163320;Transcript_240717
GO:0030955	F:potassium_ion_binding	5	0.000417327	Transcript_062774;Transcript_089776;Transcript_148826;Transcript_148905;Transcript_203310
GO:0071004	C:U2-type_prespliceosome	2	0.000439998	Transcript_009745;Transcript_147408
GO:0004144	F:diacylglycerol_O-acyltransferase_activity	2	0.000439998	Transcript_016897;Transcript_021772
GO:0019430	P:removal_of_superoxide_radicals	2	0.000439998	Transcript_006334;Transcript_044737
GO:0008483	F:transaminase_activity	2	0.000439998	Transcript_104102;Transcript_214102
GO:0030259	P:lipid_glycosylation	2	0.000439998	Transcript_144277;Transcript_239329
GO:0010162	P:seed_dormancy_process	2	0.000439998	Transcript_096084;Transcript_234806
GO:0030665	C:clathrin-coated_vesicle_membrane_	6	0.000460323	Transcript_018757;Transcript_062135;Transcript_156026;Transcript_187119;Transcript_237969;Transcript_244423
ko00906	Carotenoid_biosynthesis	3	0.00055599	Transcript_024453;Transcript_026193;Transcript_234806
GO:0006954	P:inflammatory_response	3	0.00055599	Transcript_016571;Transcript_120546;Transcript_208164
GO:0004616	F:phosphogluconate_dehydrogenase_(decarboxylating)_activity	3	0.00055599	Transcript_021635;Transcript_149539;Transcript_232471
GO:0045273	C:respiratory_chain_complex_II	3	0.00055599	Transcript_089463;Transcript_098323;Transcript_222306
GO:0006401	P:RNA_catabolic_process	3	0.00055599	Transcript_023948;Transcript_044789;Transcript_186722
GO:0010051	P:xylem_and_phloem_pattern_formation	3	0.00055599	Transcript_005135;Transcript_044528;Transcript_176239
GO:0004743	F:pyruvate_kinase_activity	5	0.00056808	Transcript_062774;Transcript_089776;Transcript_148826;Transcript_148905;Transcript_203310
GO:0000794	C:condensed_nuclear_chromosome_	5	0.00056808	Transcript_061518;Transcript_081381;Transcript_149776;Transcript_225114;Transcript_229956
GO:0000289	P:nuclear-transcribed_mRNA_poly(A)_tail_shortening	5	0.00056808	Transcript_004649;Transcript_013734;Transcript_016657;Transcript_043594;Transcript_237558
GO:0030060	F:L-malate_dehydrogenase_activity	2	0.000583492	Transcript_007900;Transcript_017810
GO:0009833	P:plant-type_primary_cell_wall_biogenesis	2	0.000583492	Transcript_148491;Transcript_223233
GO:0019985	P:translesion_synthesis	2	0.000583492	Transcript_015798;Transcript_142487
GO:0007076	P:mitotic_chromosome_condensation	2	0.000583492	Transcript_081381;Transcript_225114
GO:0016558	P:protein_import_into_peroxisome_matrix	2	0.000583492	Transcript_158550;Transcript_162000
GO:0033320	P:UDP-D-xylose_biosynthetic_process	2	0.000583492	Transcript_025190;Transcript_233387
GO:0034497	P:protein_localization_to_pre-autophagosomal_structure	2	0.000583492	Transcript_015783;Transcript_174990
GO:0003678	F:DNA_helicase_activity	2	0.000583492	Transcript_036736;Transcript_041712
GO:0000326	C:protein_storage_vacuole	2	0.000622862	Transcript_004905;Transcript_181413
GO:0005247	F:voltage-gated_chloride_channel_activity	2	0.000622862	Transcript_043022;Transcript_062728
GO:0019538	P:protein_metabolic_process	2	0.000622862	Transcript_021518;Transcript_123657
ko03070	Bacterial_secretion_system	2	0.000622862	Transcript_016146;Transcript_083711
GO:0045116	P:protein_neddylation	2	0.000622862	Transcript_083204;Transcript_112483
GO:0005753	C:mitochondrial_proton-transporting_ATP_synthase_complex	2	0.000622862	Transcript_006390;Transcript_141694
GO:0003906	F:DNA-(apurinic_or_apyrimidinic_site)_lyase_activity	2	0.000622862	Transcript_143674;Transcript_233893
GO:0000723	P:telomere_maintenance	4	0.000664015	Transcript_015798;Transcript_044881;Transcript_090284;Transcript_142487
GO:0007062	P:sister_chromatid_cohesion	4	0.000700249	Transcript_020142;Transcript_081381;Transcript_208085;Transcript_225114
GO:0010260	P:organ_senescence	3	0.000771926	Transcript_165068;Transcript_202132;Transcript_232291
GO:0008970	F:phosphatidylcholine_1-acylhydrolase_activity	3	0.000771926	Transcript_055067;Transcript_071911;Transcript_108555
GO:0004656	F:procollagen-proline_4-dioxygenase_activity	3	0.000771926	Transcript_160512;Transcript_181616;Transcript_235388
GO:0071806	P:protein_transmembrane_transport	2	0.000817154	Transcript_016146;Transcript_137810
GO:0006790	P:sulfur_compound_metabolic_process	2	0.000817154	Transcript_018713;Transcript_019778
GO:0017069	F:snRNA_binding	2	0.000817154	Transcript_165598;Transcript_240682
GO:0006695	P:cholesterol_biosynthetic_process	2	0.000817154	Transcript_018164;Transcript_225941
ko04940	Type_I_diabetes_mellitus	2	0.000817154	Transcript_006675;Transcript_027729
GO:0055037	C:recycling_endosome	2	0.000817154	Transcript_016473;Transcript_225726
GO:0005459	F:UDP-galactose_transmembrane_transporter_activity	2	0.000817154	Transcript_061254;Transcript_215450
GO:0048528	P:post-embryonic_root_development	2	0.000817154	Transcript_036091;Transcript_182308
GO:0072334	P:UDP-galactose_transmembrane_transport	2	0.000817154	Transcript_061254;Transcript_215450
GO:0040011	P:locomotion	2	0.000817154	Transcript_081381;Transcript_225114
GO:0030091	P:protein_repair	2	0.00114453	Transcript_025797;Transcript_031559
GO:0007399	P:nervous_system_development	2	0.00114453	Transcript_036202;Transcript_237581
GO:0006749	P:glutathione_metabolic_process	2	0.00114453	Transcript_026795;Transcript_209211
GO:0032266	F:phosphatidylinositol-3-phosphate_binding	2	0.00114453	Transcript_174990;Transcript_234135
GO:0009317	C:acetyl-CoA_carboxylase_complex_	2	0.00114453	Transcript_233389;Transcript_235657
GO:0006368	P:transcription_elongation_from_RNA_polymerase_II_promoter	7	0.00116438	Transcript_004649;Transcript_013734;Transcript_139660;Transcript_149744;Transcript_226584;Transcript_228720;Transcript_237558
GO:0004559	F:alpha-mannosidase_activity	3	0.00148716	Transcript_004469;Transcript_010111;Transcript_235663
GO:0003724	F:RNA_helicase_activity	3	0.00148716	Transcript_025598;Transcript_044789;Transcript_232525
GO:2000377	P:regulation_of_reactive_oxygen_species_metabolic_process	3	0.00148716	Transcript_055024;Transcript_188960;Transcript_227686
GO:0006479	P:protein_methylation	3	0.00148716	Transcript_031559;Transcript_096298;Transcript_200038
GO:0043086	P:negative_regulation_of_catalytic_activity	6	0.00150151	Transcript_014604;Transcript_046257;Transcript_152339;Transcript_186722;Transcript_208901;Transcript_229938
GO:0015786	P:UDP-glucose_transport	2	0.00160318	Transcript_061254;Transcript_215450
GO:0016246	P:RNA_interference	2	0.00160318	Transcript_144160;Transcript_177859
GO:0080031	F:methyl_salicylate_esterase_activity	2	0.00160318	Transcript_017874;Transcript_221871
GO:0009295	C:nucleoid	2	0.00160318	Transcript_044737;Transcript_187753
GO:0046556	F:alpha-L-arabinofuranosidase_activity	2	0.00160318	Transcript_014973;Transcript_156289
GO:0090332	P:stomatal_closure	2	0.00160318	Transcript_088132;Transcript_222019
GO:0010928	P:regulation_of_auxin_mediated_signaling_pathway	2	0.00160318	Transcript_018802;Transcript_034176
ko00909	Sesquiterpenoid_and_triterpenoid_biosynthesis	2	0.00160318	Transcript_032229;Transcript_077756
GO:0033539	P:fatty_acid_beta-oxidation_using_acyl-CoA_dehydrogenase	2	0.00160318	Transcript_237552;Transcript_238422
GO:0007507	P:heart_development	2	0.00160318	Transcript_015798;Transcript_142487
GO:0005460	F:UDP-glucose_transmembrane_transporter_activity	2	0.00160318	Transcript_061254;Transcript_215450
GO:0043488	P:regulation_of_mRNA_stability	2	0.00160318	Transcript_204561;Transcript_223074
GO:0000910	P:cytokinesis	2	0.00160318	Transcript_002427;Transcript_029875
GO:0008097	F:5S_rRNA_binding	2	0.00160318	Transcript_015971;Transcript_210757
GO:0010192	P:mucilage_biosynthetic_process	2	0.00160318	Transcript_042145;Transcript_223233
GO:0009901	P:anther_dehiscence	4	0.00168888	Transcript_023102;Transcript_025189;Transcript_033045;Transcript_202542
GO:0032968	P:positive_regulation_of_transcription_elongation_from_RNA_polymerase_II_promoter	4	0.00168888	Transcript_004649;Transcript_013734;Transcript_023060;Transcript_237558
GO:0008324	F:cation_transmembrane_transporter_activity	3	0.00206309	Transcript_012407;Transcript_127987;Transcript_225748
GO:0006949	P:syncytium_formation	3	0.00206309	Transcript_136126;Transcript_152343;Transcript_222950
GO:0010337	P:regulation_of_salicylic_acid_metabolic_process	3	0.00206309	Transcript_012060;Transcript_103275;Transcript_202685
ko04974	Protein_digestion_and_absorption	2	0.00224556	Transcript_023068;Transcript_025674
GO:0008320	F:protein_transmembrane_transporter_activity	2	0.00224556	Transcript_083711;Transcript_137810
GO:0016132	P:brassinosteroid_biosynthetic_process	2	0.00224556	Transcript_058180;Transcript_229566
GO:0015996	P:chlorophyll_catabolic_process	2	0.00224556	Transcript_018744;Transcript_218288
GO:0005834	C:heterotrimeric_G-protein_complex	2	0.00224556	Transcript_012392;Transcript_159282
GO:0031386	F:protein_tag	2	0.00224556	Transcript_048069;Transcript_156448
GO:0000028	P:ribosomal_small_subunit_assembly	2	0.00224556	Transcript_039229;Transcript_110572
GO:0048829	P:root_cap_development	2	0.00224556	Transcript_006557;Transcript_229566
GO:0008889	F:glycerophosphodiester_phosphodiesterase_activity	4	0.00230414	Transcript_005986;Transcript_018502;Transcript_059666;Transcript_149716
GO:0031087	P:deadenylation-independent_decapping_of_nuclear-transcribed_mRNA	4	0.00230414	Transcript_004649;Transcript_013734;Transcript_214662;Transcript_237558
GO:0000082	P:G1/S_transition_of_mitotic_cell_cycle	6	0.0026054	Transcript_000211;Transcript_007763;Transcript_015798;Transcript_036736;Transcript_040271;Transcript_142487
GO:0009308	P:amine_metabolic_process	6	0.00270427	Transcript_007347;Transcript_106270;Transcript_158955;Transcript_177859;Transcript_197557;Transcript_222613
GO:0045292	P:mRNA_cis_splicing,_via_spliceosome	6	0.00270427	Transcript_009745;Transcript_028952;Transcript_042932;Transcript_147408;Transcript_172886;Transcript_182308
GO:0008203	P:cholesterol_metabolic_process	3	0.00271515	Transcript_032704;Transcript_084987;Transcript_150018
GO:0042651	C:thylakoid_membrane	3	0.00271515	Transcript_017733;Transcript_171704;Transcript_225703
GO:0004316	F:3-oxoacyl-acyl-carrier-protein_reductase_(NADPH)_activity	3	0.00271515	Transcript_009494;Transcript_202366;Transcript_242079
GO:0006415	P:translational_termination	3	0.00271515	Transcript_026774;Transcript_151404;Transcript_230984
GO:0008026	F:ATP-dependent_helicase_activity	3	0.00271515	Transcript_066301;Transcript_155389;Transcript_173618
GO:0007520	P:myoblast_fusion	3	0.00271515	Transcript_081381;Transcript_225114;Transcript_238919
GO:0009657	P:plastid_organization	3	0.00271515	Transcript_076327;Transcript_151404;Transcript_155268
GO:0033512	P:L-lysine_catabolic_process_to_acetyl-CoA_via_saccharopine	3	0.0028604	Transcript_031909;Transcript_160957;Transcript_227947
GO:0009267	P:cellular_response_to_starvation	3	0.0028604	Transcript_017225;Transcript_138761;Transcript_188701
GO:0048813	P:dendrite_morphogenesis	3	0.0028604	Transcript_210991;Transcript_217583;Transcript_229005
GO:0043966	P:histone_H3_acetylation	3	0.0028604	Transcript_040271;Transcript_204709;Transcript_240717
GO:0010078	P:maintenance_of_root_meristem_identity	3	0.0028604	Transcript_180831;Transcript_212191;Transcript_222148
GO:0048037	F:cofactor_binding	3	0.0028604	Transcript_014114;Transcript_034054;Transcript_233806
GO:0004176	F:ATP-dependent_peptidase_activity	3	0.0028604	Transcript_026424;Transcript_158550;Transcript_222677
GO:0004069	F:L-aspartate:2-oxoglutarate_aminotransferase_activity	3	0.0028604	Transcript_034831;Transcript_135572;Transcript_157858
GO:0030663	C:COPI-coated_vesicle_membrane_	3	0.0028604	Transcript_031747;Transcript_044971;Transcript_196018
GO:0005797	C:Golgi_medial_cisterna	2	0.00314496	Transcript_089868;Transcript_180845
GO:0080156	P:mitochondrial_mRNA_modification	2	0.00314496	Transcript_002215;Transcript_243954
GO:0072583	P:clathrin-mediated_endocytosis	2	0.00314496	Transcript_185415;Transcript_193877
GO:0006103	P:2-oxoglutarate_metabolic_process	2	0.00314496	Transcript_034831;Transcript_203816
GO:0004097	F:catechol_oxidase_activity	2	0.00314496	Transcript_162207;Transcript_198102
GO:0042555	C:MCM_complex	2	0.00314496	Transcript_036736;Transcript_041712
GO:0016973	P:poly(A)+_mRNA_export_from_nucleus	2	0.00314496	Transcript_025598;Transcript_232525
GO:0003988	F:acetyl-CoA_C-acyltransferase_activity	2	0.00314496	Transcript_016755;Transcript_160618
GO:0007596	P:blood_coagulation	2	0.00314496	Transcript_026322;Transcript_079344
GO:0010212	P:response_to_ionizing_radiation	2	0.00314496	Transcript_037498;Transcript_155807
GO:0000290	P:deadenylation-dependent_decapping_of_nuclear-transcribed_mRNA	2	0.00314496	Transcript_032972;Transcript_191361
GO:0000919	P:cell_plate_assembly	2	0.00314496	Transcript_169370;Transcript_227602
GO:0009960	P:endosperm_development	5	0.00333875	Transcript_002021;Transcript_018082;Transcript_152118;Transcript_173748;Transcript_218059
GO:0043067	P:regulation_of_programmed_cell_death	3	0.00372376	Transcript_014881;Transcript_122229;Transcript_233151
GO:0009247	P:glycolipid_biosynthetic_process	3	0.00372376	Transcript_016721;Transcript_025940;Transcript_239329
GO:0005452	F:inorganic_anion_exchanger_activity	2	0.00440347	Transcript_070694;Transcript_135845
GO:0005849	C:mRNA_cleavage_factor_complex	2	0.00440347	Transcript_025855;Transcript_222390
GO:0010507	P:negative_regulation_of_autophagy	2	0.00440347	Transcript_138761;Transcript_241709
GO:0009970	P:cellular_response_to_sulfate_starvation	2	0.00440347	Transcript_034344;Transcript_207585
GO:0015867	P:ATP_transport	5	0.00448524	Transcript_017733;Transcript_029830;Transcript_045165;Transcript_206711;Transcript_233863
GO:0004521	F:endoribonuclease_activity	6	0.00459016	Transcript_022100;Transcript_023948;Transcript_034582;Transcript_048008;Transcript_069789;Transcript_185145
GO:0009641	P:shade_avoidance	3	0.00510535	Transcript_023102;Transcript_033045;Transcript_202542
GO:0018106	P:peptidyl-histidine_phosphorylation	3	0.00510535	Transcript_020405;Transcript_196770;Transcript_226660
GO:0010304	P:PSII_associated_light-harvesting_complex_II_catabolic_process	3	0.00510535	Transcript_026424;Transcript_218288;Transcript_222677
GO:0005669	C:transcription_factor_TFIID_complex	4	0.00582867	Transcript_002021;Transcript_040271;Transcript_054599;Transcript_204709
GO:0009750	P:response_to_fructose	4	0.00582867	Transcript_004493;Transcript_026193;Transcript_180358;Transcript_223119
GO:0019509	P:L-methionine_biosynthetic_process_from_methylthioadenosine	4	0.00582867	Transcript_100859;Transcript_108160;Transcript_108262;Transcript_189646
GO:0009927	F:histidine_phosphotransfer_kinase_activity	4	0.00582867	Transcript_020405;Transcript_196770;Transcript_226660;Transcript_228794
GO:0006303	P:double-strand_break_repair_via_nonhomologous_end_joining	2	0.00616304	Transcript_145917;Transcript_196318
GO:0004300	F:enoyl-CoA_hydratase_activity	2	0.00616304	Transcript_079374;Transcript_223630
GO:0043631	P:RNA_polyadenylation	2	0.00616304	Transcript_011878;Transcript_222440
GO:0004652	F:polynucleotide_adenylyltransferase_activity	2	0.00616304	Transcript_011878;Transcript_222440
GO:0050992	P:dimethylallyl_diphosphate_biosynthetic_process	2	0.00616304	Transcript_153355;Transcript_229806
GO:0006542	P:glutamine_biosynthetic_process	2	0.00616304	Transcript_018746;Transcript_091631
GO:0004356	F:glutamate-ammonia_ligase_activity	2	0.00616304	Transcript_018746;Transcript_091631
GO:0006346	P:methylation-dependent_chromatin_silencing	2	0.00616304	Transcript_144160;Transcript_177859
GO:0000003	P:reproduction	2	0.00616304	Transcript_061772;Transcript_189646
GO:0005851	C:eukaryotic_translation_initiation_factor_2B_complex	2	0.00616304	Transcript_016560;Transcript_136358
GO:0000285	F:1-phosphatidylinositol-3-phosphate_5-kinase_activity	3	0.00699613	Transcript_088132;Transcript_222019;Transcript_234135
GO:0006491	P:N-glycan_processing	3	0.00699613	Transcript_004469;Transcript_010111;Transcript_240152
GO:0005782	C:peroxisomal_matrix_	3	0.00699613	Transcript_021257;Transcript_039672;Transcript_158550
GO:0000254	F:C-4_methylsterol_oxidase_activity	2	0.00862044	Transcript_018164;Transcript_052099
GO:0006809	P:nitric_oxide_biosynthetic_process	2	0.00862044	Transcript_222613;Transcript_227686
GO:0007281	P:germ_cell_development	2	0.00862044	Transcript_175896;Transcript_233284
GO:0002213	P:defense_response_to_insect	2	0.00862044	Transcript_042206;Transcript_193866
GO:0042644	C:chloroplast_nucleoid	2	0.00862044	Transcript_044737;Transcript_143674
GO:0015783	P:GDP-fucose_transport	2	0.00862044	Transcript_061254;Transcript_215450
GO:0008453	F:alanine-glyoxylate_transaminase_activity	2	0.00862044	Transcript_226878;Transcript_243550
GO:0005457	F:GDP-fucose_transmembrane_transporter_activity	2	0.00862044	Transcript_061254;Transcript_215450
GO:0010047	P:fruit_dehiscence	2	0.00862044	Transcript_149060;Transcript_192644
GO:0007519	P:skeletal_muscle_tissue_development	2	0.00862044	Transcript_081381;Transcript_225114
GO:0004328	F:formamidase_activity	2	0.00862044	Transcript_030194;Transcript_082227
GO:0045214	P:sarcomere_organization	2	0.00862044	Transcript_081381;Transcript_225114
GO:0051403	P:stress-activated_MAPK_cascade	3	0.0095806	Transcript_012506;Transcript_022653;Transcript_154573
GO:0030983	F:mismatched_DNA_binding	3	0.0095806	Transcript_172646;Transcript_188668;Transcript_228895
GO:0008201	F:heparin_binding	2	0.0114486	Transcript_088645;Transcript_240050
GO:0006376	P:mRNA_splice_site_selection	2	0.0114486	Transcript_051286;Transcript_210034
GO:0008893	F:guanosine-3',5'-bis(diphosphate)_3'-diphosphatase_activity	2	0.0114486	Transcript_042217;Transcript_224141
GO:0033384	P:geranyl_diphosphate_biosynthetic_process	2	0.0114486	Transcript_023190;Transcript_225941
GO:0005763	C:mitochondrial_small_ribosomal_subunit	2	0.0114486	Transcript_126398;Transcript_156647
GO:0004161	F:dimethylallyltranstransferase_activity	2	0.0114486	Transcript_023190;Transcript_225941
GO:2000031	P:regulation_of_salicylic_acid_mediated_signaling_pathway	2	0.0114486	Transcript_042206;Transcript_145272
GO:0032586	C:protein_storage_vacuole_membrane	2	0.0114486	Transcript_004905;Transcript_181413
GO:0045337	P:farnesyl_diphosphate_biosynthetic_process	2	0.0114486	Transcript_023190;Transcript_225941
GO:0006388	P:tRNA_splicing,_via_endonucleolytic_cleavage_and_ligation	2	0.0114486	Transcript_190785;Transcript_222390
GO:0004337	F:geranyltranstransferase_activity	2	0.0114486	Transcript_023190;Transcript_225941
GO:0030587	P:sorocarp_development	2	0.0114486	Transcript_235663;Transcript_242610
GO:0000373	P:Group_II_intron_splicing	2	0.0114486	Transcript_026077;Transcript_225044
GO:0047484	P:regulation_of_response_to_osmotic_stress	2	0.0120475	Transcript_042145;Transcript_227688
GO:0019104	F:DNA_N-glycosylase_activity	2	0.0120475	Transcript_143674;Transcript_197824
GO:0004864	F:protein_phosphatase_inhibitor_activity	2	0.0120475	Transcript_152339;Transcript_229938
GO:0047938	F:glucose-6-phosphate_1-epimerase_activity	2	0.0120475	Transcript_010174;Transcript_233995
GO:0010440	P:stomatal_lineage_progression	2	0.0120475	Transcript_027192;Transcript_143778
GO:0006461	P:protein_complex_assembly	2	0.0120475	Transcript_018791;Transcript_033378
GO:0033281	C:TAT_protein_transport_complex	2	0.0120475	Transcript_016146;Transcript_083711
GO:0004747	F:ribokinase_activity	2	0.0120475	Transcript_005402;Transcript_227092
GO:0007525	P:somatic_muscle_development	2	0.0120475	Transcript_081381;Transcript_225114
GO:0009229	P:thiamine_diphosphate_biosynthetic_process	2	0.0120475	Transcript_071931;Transcript_090030
GO:0015804	P:neutral_amino_acid_transport	2	0.0120475	Transcript_041292;Transcript_097145
GO:0004148	F:dihydrolipoyl_dehydrogenase_activity	2	0.0120475	Transcript_020906;Transcript_121426
GO:0035206	P:regulation_of_hemocyte_proliferation	2	0.0120475	Transcript_081381;Transcript_225114
GO:0016998	P:cell_wall_macromolecule_catabolic_process	2	0.0120475	Transcript_096837;Transcript_149601
GO:0051259	P:protein_oligomerization	2	0.0120475	Transcript_034054;Transcript_139813
GO:0009088	P:threonine_biosynthetic_process	3	0.0131077	Transcript_045644;Transcript_157295;Transcript_209738
GO:0008047	F:enzyme_activator_activity	3	0.0131077	Transcript_006334;Transcript_014604;Transcript_037644
GO:0004180	F:carboxypeptidase_activity	3	0.0131077	Transcript_023068;Transcript_025674;Transcript_042380
GO:0042645	C:mitochondrial_nucleoid	3	0.0131077	Transcript_016986;Transcript_203816;Transcript_244675
GO:0045486	F:naringenin_3-dioxygenase_activity	3	0.0131077	Transcript_215624;Transcript_220342;Transcript_232480
GO:0006807	P:nitrogen_compound_metabolic_process	6	0.0140945	Transcript_018842;Transcript_034831;Transcript_082227;Transcript_187768;Transcript_240152;Transcript_243134
GO:0010117	P:photoprotection	2	0.0158279	Transcript_017733;Transcript_042062
GO:0017022	F:myosin_binding	2	0.0158279	Transcript_027314;Transcript_032123
GO:0010206	P:photosystem_II_repair	2	0.0158279	Transcript_017733;Transcript_028942
GO:0031463	C:Cul3-RING_ubiquitin_ligase_complex_	2	0.0158279	Transcript_031835;Transcript_083204
GO:0016779	F:nucleotidyltransferase_activity_	2	0.0158279	Transcript_030122;Transcript_149452
GO:0003691	F:double-stranded_telomeric_DNA_binding	2	0.0158279	Transcript_171515;Transcript_185779
GO:0070300	F:phosphatidic_acid_binding	3	0.0179115	Transcript_025498;Transcript_153373;Transcript_192590
GO:0004526	F:ribonuclease_P_activity	3	0.0179115	Transcript_041560;Transcript_125733;Transcript_205336
GO:0008878	F:glucose-1-phosphate_adenylyltransferase_activity	3	0.0179115	Transcript_008643;Transcript_040039;Transcript_041688
GO:0005687	C:U4_snRNP	3	0.0179115	Transcript_006849;Transcript_033816;Transcript_191863
GO:0006556	P:S-adenosylmethionine_biosynthetic_process	5	0.0182825	Transcript_006978;Transcript_030648;Transcript_042822;Transcript_159028;Transcript_222314
GO:0006144	P:purine_nucleobase_metabolic_process	4	0.0183376	Transcript_018744;Transcript_099845;Transcript_209045;Transcript_229104
GO:0016308	F:1-phosphatidylinositol-4-phosphate_5-kinase_activity	4	0.0183376	Transcript_042004;Transcript_157618;Transcript_185415;Transcript_187099
GO:0010044	P:response_to_aluminum_ion	2	0.0218705	Transcript_145917;Transcript_224363
GO:0009648	P:photoperiodism	2	0.0218705	Transcript_034016;Transcript_044327
GO:0007021	P:tubulin_complex_assembly	2	0.0218705	Transcript_173748;Transcript_182499
GO:0080110	P:sporopollenin_biosynthetic_process	2	0.0218705	Transcript_131936;Transcript_153953
GO:0030658	C:transport_vesicle_membrane	2	0.0218705	Transcript_027098;Transcript_158532
ko04970	Salivary_secretion	2	0.0218705	Transcript_031338;Transcript_093127
GO:0010427	F:abscisic_acid_binding	2	0.0218705	Transcript_152339;Transcript_229938
ko00440	Phosphonate_and_phosphinate_metabolism	2	0.0218705	Transcript_026222;Transcript_026934
GO:0010264	P:myo-inositol_hexakisphosphate_biosynthetic_process	2	0.0218705	Transcript_014528;Transcript_203823
GO:0000784	C:nuclear_chromosome,_telomeric_region	3	0.0235345	Transcript_041712;Transcript_171515;Transcript_185779
GO:0015866	P:ADP_transport	3	0.0235345	Transcript_029830;Transcript_045165;Transcript_233863
GO:0000347	C:THO_complex	3	0.0235345	Transcript_149744;Transcript_208937;Transcript_220063
GO:0030117	C:membrane_coat	3	0.0235345	Transcript_018757;Transcript_044971;Transcript_156026
GO:0050734	F:hydroxycinnamoyltransferase_activity_	3	0.0235345	Transcript_057799;Transcript_197038;Transcript_220227
GO:0033588	C:Elongator_holoenzyme_complex	3	0.0235345	Transcript_018802;Transcript_034176;Transcript_191437
GO:0033926	F:glycopeptide_alpha-N-acetylgalactosaminidase_activity	5	0.0241676	Transcript_017853;Transcript_023370;Transcript_109577;Transcript_165034;Transcript_199971
GO:0004478	F:methionine_adenosyltransferase_activity	5	0.0241676	Transcript_006978;Transcript_030648;Transcript_042822;Transcript_159028;Transcript_222314
GO:0008131	F:primary_amine_oxidase_activity	3	0.0244375	Transcript_007347;Transcript_158955;Transcript_222613
GO:0000394	P:RNA_splicing,_via_endonucleolytic_cleavage_and_ligation	3	0.0244375	Transcript_042932;Transcript_100859;Transcript_229104
GO:0007498	P:mesoderm_development	4	0.0245891	Transcript_027666;Transcript_081381;Transcript_191165;Transcript_225114
GO:0004430	F:1-phosphatidylinositol_4-kinase_activity_	4	0.0245891	Transcript_012398;Transcript_030476;Transcript_068167;Transcript_192590
GO:0009956	P:radial_pattern_formation	2	0.030196	Transcript_016473;Transcript_225726
GO:0006835	P:dicarboxylic_acid_transport	2	0.030196	Transcript_084246;Transcript_175898
GO:0001701	P:in_utero_embryonic_development	2	0.030196	Transcript_225771;Transcript_240152
GO:0005310	F:dicarboxylic_acid_transmembrane_transporter_activity	2	0.030196	Transcript_084246;Transcript_175898
GO:0010067	P:procambium_histogenesis	2	0.030196	Transcript_093212;Transcript_163320
GO:0045905	P:positive_regulation_of_translational_termination	2	0.030196	Transcript_028857;Transcript_041538
GO:0016798	F:hydrolase_activity,_acting_on_glycosyl_bonds	2	0.030196	Transcript_049632;Transcript_236388
GO:0048812	P:neuron_projection_morphogenesis	2	0.030196	Transcript_045027;Transcript_229005
GO:0016151	F:nickel_cation_binding	2	0.030196	Transcript_187768;Transcript_240346
GO:0009051	P:pentose-phosphate_shunt,_oxidative_branch	2	0.030196	Transcript_228021;Transcript_232471
GO:0006452	P:translational_frameshifting	2	0.030196	Transcript_028857;Transcript_041538
GO:0043044	P:ATP-dependent_chromatin_remodeling	2	0.030196	Transcript_139660;Transcript_210991
GO:0045901	P:positive_regulation_of_translational_elongation	2	0.030196	Transcript_028857;Transcript_041538
GO:0051262	P:protein_tetramerization	2	0.030196	Transcript_172102;Transcript_223426
GO:0004750	F:ribulose-phosphate_3-epimerase_activity	2	0.030196	Transcript_108985;Transcript_142152
GO:0004792	F:thiosulfate_sulfurtransferase_activity	2	0.030196	Transcript_102293;Transcript_216545
GO:0001708	P:cell_fate_specification	2	0.030196	Transcript_005135;Transcript_041113
GO:0008469	F:histone-arginine_N-methyltransferase_activity	2	0.030196	Transcript_014508;Transcript_123272
GO:0015706	P:nitrate_transport	3	0.0317618	Transcript_042300;Transcript_043022;Transcript_062728
GO:0005347	F:ATP_transmembrane_transporter_activity	3	0.0317618	Transcript_017733;Transcript_029830;Transcript_206711
GO:0032957	P:inositol_trisphosphate_metabolic_process	3	0.0317618	Transcript_014528;Transcript_031663;Transcript_240214
GO:0030017	C:sarcomere	3	0.0317618	Transcript_081381;Transcript_217583;Transcript_225114
GO:0031674	C:I_band	3	0.0317618	Transcript_016203;Transcript_081381;Transcript_225114
GO:0016070	P:RNA_metabolic_process	4	0.0329086	Transcript_042932;Transcript_044789;Transcript_191361;Transcript_224847
GO:0019284	P:L-methionine_biosynthetic_process_from_S-adenosylmethionine	2	0.0416444	Transcript_100859;Transcript_108262
ko04614	Renin-angiotensin_system	2	0.0416444	Transcript_023068;Transcript_025674
GO:0004314	F:acyl-carrier-protein_S-malonyltransferase_activity	2	0.0416444	Transcript_095317;Transcript_242079
GO:0006283	P:transcription-coupled_nucleotide-excision_repair	2	0.0416444	Transcript_015798;Transcript_142487
GO:0009787	P:regulation_of_abscisic_acid-activated_signaling_pathway	2	0.0416444	Transcript_018802;Transcript_034176
GO:0004128	F:cytochrome-b5_reductase_activity,_acting_on_NAD(P)H	2	0.0416444	Transcript_050536;Transcript_169480
GO:0005504	F:fatty_acid_binding	2	0.0416444	Transcript_018841;Transcript_059959
GO:0017137	F:Rab_GTPase_binding	2	0.0416444	Transcript_015116;Transcript_044539
GO:0003849	F:3-deoxy-7-phosphoheptulonate_synthase_activity	3	0.0428083	Transcript_042248;Transcript_090733;Transcript_109203
GO:0000339	F:RNA_cap_binding	3	0.0428083	Transcript_042932;Transcript_043594;Transcript_191361
GO:0033169	P:histone_H3-K9_demethylation	3	0.0428083	Transcript_006542;Transcript_074557;Transcript_237979
GO:0000387	P:spliceosomal_snRNP_assembly	4	0.0439386	Transcript_006849;Transcript_033816;Transcript_182308;Transcript_191863
GO:0000288	P:nuclear-transcribed_mRNA_catabolic_process,_deadenylation-dependent_decay	5	0.05513	Transcript_004649;Transcript_013734;Transcript_043594;Transcript_180390;Transcript_237558
GO:0035264	P:multicellular_organism_growth	2	0.057345	Transcript_040271;Transcript_042062
GO:0033178	C:proton-transporting_two-sector_ATPase_complex,_catalytic_domain_	2	0.057345	Transcript_004585;Transcript_235352
GO:0008307	F:structural_constituent_of_muscle	2	0.057345	Transcript_081381;Transcript_225114
GO:0045169	C:fusome	2	0.057345	Transcript_002621;Transcript_149814
GO:0070531	C:BRCA1-A_complex_	2	0.057345	Transcript_037498;Transcript_212191
GO:0000243	C:commitment_complex_	2	0.057345	Transcript_009745;Transcript_147408
GO:0007552	P:metamorphosis	2	0.057345	Transcript_014088;Transcript_077480
GO:0005987	P:sucrose_catabolic_process	2	0.057345	Transcript_109577;Transcript_165034
GO:0007569	P:cell_aging	2	0.057345	Transcript_101332;Transcript_229810
GO:0000023	P:maltose_metabolic_process	3	0.0575962	Transcript_013575;Transcript_078260;Transcript_100859
GO:0045739	P:positive_regulation_of_DNA_repair	3	0.077317	Transcript_015798;Transcript_037498;Transcript_142487
GO:0052594	F:aminoacetone:oxygen_oxidoreductase(deaminating)_activity	3	0.077317	Transcript_007347;Transcript_158955;Transcript_222613
GO:0052596	F:phenethylamine:oxygen_oxidoreductase_(deaminating)_activity	3	0.077317	Transcript_007347;Transcript_158955;Transcript_222613
GO:0045047	P:protein_targeting_to_ER	3	0.077317	Transcript_070004;Transcript_217083;Transcript_232885
GO:0052593	F:tryptamine:oxygen_oxidoreductase_(deaminating)_activity	3	0.077317	Transcript_007347;Transcript_158955;Transcript_222613
GO:0052595	F:aliphatic-amine_oxidase_activity_	3	0.077317	Transcript_007347;Transcript_158955;Transcript_222613
GO:0010289	P:homogalacturonan_biosynthetic_process	2	0.0788008	Transcript_218648;Transcript_236296
GO:0004072	F:aspartate_kinase_activity	2	0.0788008	Transcript_045644;Transcript_157295
GO:0016529	C:sarcoplasmic_reticulum	2	0.0788008	Transcript_016203;Transcript_026322
GO:0010098	P:suspensor_development	2	0.0788008	Transcript_022653;Transcript_154573
GO:0006625	P:protein_targeting_to_peroxisome	2	0.0788008	Transcript_018317;Transcript_207612
GO:0009584	P:detection_of_visible_light	2	0.0788008	Transcript_109012;Transcript_237130
GO:1900150	P:regulation_of_defense_response_to_fungus	2	0.0788008	Transcript_145272;Transcript_240304
GO:0004013	F:adenosylhomocysteinase_activity	2	0.0788008	Transcript_227819;Transcript_237995
GO:0043596	C:nuclear_replication_fork	4	0.0971681	Transcript_015798;Transcript_041712;Transcript_142487;Transcript_210615
GO:0019752	P:carboxylic_acid_metabolic_process	3	0.103488	Transcript_031557;Transcript_075347;Transcript_077725
GO:0005471	F:ATP:ADP_antiporter_activity	3	0.103488	Transcript_007414;Transcript_045165;Transcript_233863
GO:0046688	P:response_to_copper_ion	3	0.103488	Transcript_035581;Transcript_213719;Transcript_235120
GO:0016682	F:oxidoreductase_activity,_acting_on_diphenols_and_related_substances_as_donors,_oxygen_as_acceptor	3	0.103488	Transcript_165068;Transcript_202132;Transcript_232291
GO:0009861	P:jasmonic_acid_and_ethylene-dependent_systemic_resistance	3	0.103488	Transcript_023102;Transcript_033045;Transcript_202542
GO:0006855	P:drug_transmembrane_transport	3	0.103488	Transcript_007304;Transcript_027194;Transcript_114532
GO:1903507	P:negative_regulation_of_nucleic_acid-templated_transcription	3	0.103488	Transcript_063895;Transcript_099209;Transcript_150574
GO:0000974	C:Prp19_complex	3	0.103488	Transcript_028952;Transcript_193507;Transcript_208090
GO:0009052	P:pentose-phosphate_shunt,_non-oxidative_branch	2	0.104294	Transcript_161222;Transcript_166804
GO:0016784	F:3-mercaptopyruvate_sulfurtransferase_activity	2	0.104294	Transcript_102293;Transcript_216545
GO:0045297	P:post-mating_behavior	2	0.104294	Transcript_014088;Transcript_077480
GO:0007095	P:mitotic_G2_DNA_damage_checkpoint	2	0.104294	Transcript_027666;Transcript_186849
GO:0006450	P:regulation_of_translational_fidelity	2	0.104294	Transcript_110572;Transcript_238069
GO:0006574	P:valine_catabolic_process	2	0.104294	Transcript_021635;Transcript_149539
GO:0016203	P:muscle_attachment	2	0.104294	Transcript_081381;Transcript_225114
GO:0004142	F:diacylglycerol_cholinephosphotransferase_activity	2	0.104294	Transcript_026222;Transcript_026934
GO:0042256	P:mature_ribosome_assembly	2	0.104294	Transcript_006795;Transcript_157447
GO:0031369	F:translation_initiation_factor_binding	2	0.104294	Transcript_136358;Transcript_180390
GO:0070987	P:error-free_translesion_synthesis	2	0.104294	Transcript_015798;Transcript_142487
GO:0019483	P:beta-alanine_biosynthetic_process	2	0.104294	Transcript_027691;Transcript_225771
GO:0007368	P:determination_of_left/right_symmetry	2	0.104294	Transcript_161316;Transcript_191165
GO:0070273	F:phosphatidylinositol-4-phosphate_binding	2	0.104294	Transcript_192590;Transcript_240304
GO:0000813	C:ESCRT_I_complex_	2	0.104294	Transcript_040180;Transcript_212485
GO:0034969	P:histone_arginine_methylation	2	0.107984	Transcript_014508;Transcript_123272
GO:0071560	P:cellular_response_to_transforming_growth_factor_beta_stimulus	2	0.107984	Transcript_088645;Transcript_240050
GO:0004615	F:phosphomannomutase_activity	2	0.107984	Transcript_009809;Transcript_223241
GO:0070919	P:production_of_siRNA_involved_in_chromatin_silencing_by_small_RNA	2	0.107984	Transcript_052769;Transcript_241334
GO:0033017	C:sarcoplasmic_reticulum_membrane	2	0.107984	Transcript_016203;Transcript_026322
GO:0046373	P:L-arabinose_metabolic_process	2	0.107984	Transcript_014973;Transcript_156289
GO:0015112	F:nitrate_transmembrane_transporter_activity	2	0.107984	Transcript_042300;Transcript_043022
GO:0005663	C:DNA_replication_factor_C_complex_	2	0.107984	Transcript_015798;Transcript_142487
GO:0008615	P:pyridoxine_biosynthetic_process	2	0.107984	Transcript_072587;Transcript_172211
GO:0031053	P:primary_miRNA_processing	2	0.107984	Transcript_042932;Transcript_235950
GO:0009953	P:dorsal/ventral_pattern_formation	2	0.107984	Transcript_042022;Transcript_201819
GO:0080073	F:spermidine:coumaroyl_CoA_N-acyltransferase_activity	3	0.134412	Transcript_057799;Transcript_197038;Transcript_220227
GO:0009451	P:RNA_modification	3	0.138001	Transcript_002215;Transcript_023301;Transcript_226817
GO:0047911	F:galacturan_1,4-alpha-galacturonidase_activity	3	0.138001	Transcript_025932;Transcript_187941;Transcript_222225
GO:0031461	C:cullin-RING_ubiquitin_ligase_complex_	3	0.138001	Transcript_046257;Transcript_061518;Transcript_149776
GO:0016410	F:N-acyltransferase_activity	3	0.138001	Transcript_057799;Transcript_197038;Transcript_220227
GO:0043508	P:negative_regulation_of_JUN_kinase_activity	2	0.141419	Transcript_101332;Transcript_229810
GO:0034620	P:cellular_response_to_unfolded_protein	2	0.141419	Transcript_095486;Transcript_243848
GO:0008835	F:diaminohydroxyphosphoribosylaminopyrimidine_deaminase_activity	2	0.141419	Transcript_013777;Transcript_204443
GO:0052691	F:UDP-arabinopyranose_mutase_activity	2	0.141419	Transcript_015198;Transcript_180358
GO:0019827	P:stem_cell_maintenance	2	0.141419	Transcript_031558;Transcript_044881
GO:0004571	F:mannosyl-oligosaccharide_1,2-alpha-mannosidase_activity	2	0.141419	Transcript_004469;Transcript_010111
GO:0030337	F:DNA_polymerase_processivity_factor_activity	2	0.141419	Transcript_015798;Transcript_142487
GO:0016810	F:hydrolase_activity,_acting_on_carbon-nitrogen_(but_not_peptide)_bonds	2	0.141419	Transcript_008582;Transcript_234726
GO:0033306	P:phytol_metabolic_process	2	0.141419	Transcript_016897;Transcript_021772
GO:0007522	P:visceral_muscle_development	2	0.141419	Transcript_081381;Transcript_225114
GO:0008428	F:ribonuclease_inhibitor_activity	2	0.141419	Transcript_186722;Transcript_193243
GO:0004751	F:ribose-5-phosphate_isomerase_activity	2	0.141419	Transcript_161222;Transcript_166804
GO:0031538	P:negative_regulation_of_anthocyanin_metabolic_process	2	0.141419	Transcript_018802;Transcript_034176
GO:0005863	C:striated_muscle_myosin_thick_filament	2	0.141419	Transcript_081381;Transcript_225114
GO:0042255	P:ribosome_assembly	2	0.141419	Transcript_017924;Transcript_043071
GO:0001889	P:liver_development	5	0.150053	Transcript_040271;Transcript_048363;Transcript_225771;Transcript_234175;Transcript_240152
GO:0070557	C:PCNA-p21_complex	2	0.160589	Transcript_015798;Transcript_142487
GO:0043626	C:PCNA_complex	2	0.160589	Transcript_015798;Transcript_142487
GO:0008478	F:pyridoxal_kinase_activity	2	0.160589	Transcript_072587;Transcript_172211
GO:0000701	F:purine-specific_mismatch_base_pair_DNA_N-glycosylase_activity	2	0.160589	Transcript_015798;Transcript_142487
GO:0032077	P:positive_regulation_of_deoxyribonuclease_activity	2	0.160589	Transcript_015798;Transcript_142487
GO:0032405	F:MutLalpha_complex_binding	2	0.160589	Transcript_015798;Transcript_142487
GO:0032139	F:dinucleotide_insertion_or_deletion_binding	2	0.160589	Transcript_015798;Transcript_142487
GO:0080075	F:spermidine:feruloyl_CoA_N-acyltransferase_activity	3	0.177343	Transcript_057799;Transcript_197038;Transcript_220227
GO:0052725	F:inositol-1,3,4-trisphosphate_6-kinase_activity	3	0.177343	Transcript_014528;Transcript_031663;Transcript_240214
GO:0080088	P:spermidine_hydroxycinnamate_conjugate_biosynthetic_process	3	0.177343	Transcript_057799;Transcript_197038;Transcript_220227
GO:0030015	C:CCR4-NOT_core_complex_	3	0.177343	Transcript_004649;Transcript_013734;Transcript_237558
GO:0080074	F:spermidine:caffeoyl_CoA_N-acyltransferase_activity	3	0.177343	Transcript_057799;Transcript_197038;Transcript_220227
GO:0006369	P:termination_of_RNA_polymerase_II_transcription	3	0.177343	Transcript_013970;Transcript_139660;Transcript_159255
GO:0035265	P:organ_growth	3	0.177343	Transcript_018802;Transcript_034176;Transcript_232386
GO:0008728	F:GTP_diphosphokinase_activity	2	0.19126	Transcript_042217;Transcript_192556
GO:0042552	P:myelination	2	0.19126	Transcript_016560;Transcript_136358
GO:0015969	P:guanosine_tetraphosphate_metabolic_process	2	0.19126	Transcript_042217;Transcript_192556
GO:0048530	P:fruit_morphogenesis	2	0.19126	Transcript_018802;Transcript_034176
GO:0017006	P:protein-tetrapyrrole_linkage	2	0.19126	Transcript_109012;Transcript_237130
GO:0047130	F:saccharopine_dehydrogenase_(NADP+,_L-lysine-forming)_activity	2	0.19126	Transcript_160957;Transcript_227947
GO:0047131	F:saccharopine_dehydrogenase_(NAD+,_L-glutamate-forming)_activity	2	0.19126	Transcript_160957;Transcript_227947
GO:0008202	P:steroid_metabolic_process	2	0.19126	Transcript_018164;Transcript_044528
GO:0051861	F:glycolipid_binding	2	0.19126	Transcript_170554;Transcript_199534
GO:0042766	P:nucleosome_mobilization	2	0.19126	Transcript_139660;Transcript_229005
GO:0017089	F:glycolipid_transporter_activity	2	0.19126	Transcript_170554;Transcript_199534
GO:0043078	C:polar_nucleus	2	0.19126	Transcript_082888;Transcript_243354
GO:0019307	P:mannose_biosynthetic_process	2	0.19126	Transcript_009809;Transcript_223241
GO:0043140	F:ATP-dependent_3'-5'_DNA_helicase_activity	2	0.19126	Transcript_026221;Transcript_155807
GO:0035067	P:negative_regulation_of_histone_acetylation	2	0.19126	Transcript_074557;Transcript_212191
GO:0006298	P:mismatch_repair	4	0.209614	Transcript_015798;Transcript_142487;Transcript_172646;Transcript_188668
GO:0080072	F:spermidine:sinapoyl_CoA_N-acyltransferase_activity	4	0.209614	Transcript_057799;Transcript_097155;Transcript_197038;Transcript_220227
GO:0034719	C:SMN-Sm_protein_complex	3	0.233088	Transcript_006849;Transcript_033816;Transcript_191863
GO:0034709	C:methylosome	3	0.233088	Transcript_006849;Transcript_033816;Transcript_191863
GO:0047714	F:galactolipase_activity	2	0.257725	Transcript_055067;Transcript_108555
GO:0004307	F:ethanolaminephosphotransferase_activity	2	0.257725	Transcript_026222;Transcript_026934
GO:0031627	P:telomeric_loop_formation	2	0.257725	Transcript_171515;Transcript_185779
GO:0000271	P:polysaccharide_biosynthetic_process	2	0.257725	Transcript_004982;Transcript_229566
ko00281	Geraniol_degradation	2	0.257725	Transcript_016624;Transcript_021346
GO:0016560	P:protein_import_into_peroxisome_matrix,_docking	2	0.257725	Transcript_018317;Transcript_207612
GO:0004737	F:pyruvate_decarboxylase_activity	2	0.257725	Transcript_000852;Transcript_037155
GO:0000036	F:ACP_phosphopantetheine_attachment_site_binding_involved_in_fatty_acid_biosynthetic_process	2	0.257725	Transcript_020239;Transcript_027173
GO:0030855	P:epithelial_cell_differentiation	2	0.257725	Transcript_015798;Transcript_142487
GO:0031072	F:heat_shock_protein_binding	2	0.257725	Transcript_139813;Transcript_208901
GO:0019028	C:viral_capsid_	2	0.257725	Transcript_043263;Transcript_149903
GO:0031124	P:mRNA_3'-end_processing	2	0.257725	Transcript_013970;Transcript_159255
GO:0046538	F:2,3-bisphosphoglycerate-dependent_phosphoglycerate_mutase_activity_	2	0.257725	Transcript_014114;Transcript_016946
GO:0009625	P:response_to_insect	6	0.265148	Transcript_023102;Transcript_031557;Transcript_033045;Transcript_042206;Transcript_181429;Transcript_202542
GO:0010230	P:alternative_respiration	2	0.290201	Transcript_090681;Transcript_212580
GO:0005746	C:mitochondrial_respiratory_chain	3	0.304804	Transcript_022558;Transcript_096433;Transcript_198631
GO:0035097	C:histone_methyltransferase_complex_	3	0.304804	Transcript_183851;Transcript_199156;Transcript_229005
GO:0047325	F:inositol_tetrakisphosphate_1-kinase_activity	3	0.304804	Transcript_014528;Transcript_031663;Transcript_240214
GO:0035242	F:protein-arginine_omega-N_asymmetric_methyltransferase_activity	3	0.304804	Transcript_014508;Transcript_123272;Transcript_200038
GO:0052726	F:inositol-1,3,4-trisphosphate_5-kinase_activity	3	0.304804	Transcript_014528;Transcript_031663;Transcript_240214
GO:0008186	F:RNA-dependent_ATPase_activity	3	0.304804	Transcript_013970;Transcript_025598;Transcript_232525
GO:0006436	P:tryptophanyl-tRNA_aminoacylation	2	0.345502	Transcript_206168;Transcript_240340
GO:0016992	F:lipoate_synthase_activity	2	0.345502	Transcript_015584;Transcript_083010
GO:0017077	F:oxidative_phosphorylation_uncoupler_activity	2	0.345502	Transcript_002810;Transcript_084246
GO:0006068	P:ethanol_catabolic_process	2	0.345502	Transcript_033844;Transcript_234175
GO:0009558	P:embryo_sac_cellularization	2	0.345502	Transcript_009001;Transcript_173748
GO:0045431	F:flavonol_synthase_activity	2	0.345502	Transcript_215624;Transcript_220342
GO:0030008	C:TRAPP_complex	2	0.345502	Transcript_001104;Transcript_015783
GO:0004830	F:tryptophan-tRNA_ligase_activity	2	0.345502	Transcript_206168;Transcript_240340
GO:0010277	F:chlorophyllide_a_oxygenase_overall_activity	2	0.345502	Transcript_032252;Transcript_171704
GO:0004311	F:farnesyltranstransferase_activity	2	0.345502	Transcript_023190;Transcript_156161
GO:0000710	P:meiotic_mismatch_repair	2	0.345502	Transcript_172646;Transcript_228895
GO:0032504	P:multicellular_organism_reproduction	2	0.345502	Transcript_145917;Transcript_176239
GO:0045131	F:pre-mRNA_branch_point_binding	2	0.345502	Transcript_009745;Transcript_147408
GO:0042276	P:error-prone_translesion_synthesis	2	0.345502	Transcript_015798;Transcript_142487
GO:0034715	C:pICln-Sm_protein_complex	3	0.395921	Transcript_006849;Transcript_033816;Transcript_191863
GO:0006107	P:oxaloacetate_metabolic_process	2	0.452387	Transcript_018842;Transcript_236821
GO:0010698	F:acetyltransferase_activator_activity	2	0.452387	Transcript_088645;Transcript_240050
GO:0007004	P:telomere_maintenance_via_telomerase	2	0.452387	Transcript_044881;Transcript_145917
GO:1903645	P:negative_regulation_of_chaperone-mediated_protein_folding	2	0.452387	Transcript_088645;Transcript_240050
GO:0042820	P:vitamin_B6_catabolic_process	2	0.452387	Transcript_040273;Transcript_162588
GO:0014003	P:oligodendrocyte_development	2	0.452387	Transcript_016560;Transcript_136358
GO:0001541	P:ovarian_follicle_development	2	0.452387	Transcript_016560;Transcript_136358
GO:0090200	P:positive_regulation_of_release_of_cytochrome_c_from_mitochondria	2	0.452387	Transcript_088645;Transcript_240050
GO:1903638	P:positive_regulation_of_protein_import_into_mitochondrial_outer_membrane	2	0.452387	Transcript_088645;Transcript_240050
GO:0042821	P:pyridoxal_biosynthetic_process	2	0.452387	Transcript_040273;Transcript_162588
GO:0050236	F:pyridoxine:NADP_4-dehydrogenase_activity	2	0.452387	Transcript_040273;Transcript_162588
GO:0051716	P:cellular_response_to_stimulus	2	0.452387	Transcript_016560;Transcript_136358
GO:0046523	F:S-methyl-5-thioribose-1-phosphate_isomerase_activity	2	0.459823	Transcript_100859;Transcript_108262
GO:0080178	P:5-carbamoylmethyluridine_metabolic_process	2	0.459823	Transcript_018802;Transcript_034176
GO:0006007	P:glucose_catabolic_process	2	0.459823	Transcript_150940;Transcript_180358
GO:0007064	P:mitotic_sister_chromatid_cohesion	2	0.459823	Transcript_031363;Transcript_121303
GO:0000002	P:mitochondrial_genome_maintenance	2	0.459823	Transcript_215297;Transcript_228895
GO:0019788	F:NEDD8_transferase_activity	2	0.459823	Transcript_083204;Transcript_112483
GO:0045088	P:regulation_of_innate_immune_response	2	0.459823	Transcript_210991;Transcript_238051
GO:0030122	C:AP-2_adaptor_complex_	2	0.459823	Transcript_027502;Transcript_043468
GO:0003937	F:IMP_cyclohydrolase_activity	2	0.459823	Transcript_209045;Transcript_228479
GO:0007224	P:smoothened_signaling_pathway	2	0.459823	Transcript_059959;Transcript_083204
GO:0008146	F:sulfotransferase_activity	2	0.459823	Transcript_025940;Transcript_041372
GO:0004643	F:phosphoribosylaminoimidazolecarboxamide_formyltransferase_activity	2	0.459823	Transcript_209045;Transcript_228479
GO:0070008	F:serine-type_exopeptidase_activity	3	0.502614	Transcript_153193;Transcript_172827;Transcript_195425
GO:0008174	F:mRNA_methyltransferase_activity	3	0.502614	Transcript_149903;Transcript_165031;Transcript_199141
GO:0039694	P:viral_RNA_genome_replication	3	0.502614	Transcript_149903;Transcript_165031;Transcript_199141
GO:0043280	P:positive_regulation_of_cysteine-type_endopeptidase_activity_involved_in_apoptotic_process	3	0.509762	Transcript_088645;Transcript_184894;Transcript_240050
GO:0019919	P:peptidyl-arginine_methylation,_to_asymmetrical-dimethyl_arginine	3	0.509762	Transcript_014508;Transcript_123272;Transcript_200038
GO:0008356	P:asymmetric_cell_division	5	0.572236	Transcript_016473;Transcript_019684;Transcript_043468;Transcript_225726;Transcript_238051
GO:0034393	P:positive_regulation_of_smooth_muscle_cell_apoptotic_process	2	0.595789	Transcript_101332;Transcript_229810
GO:0004034	F:aldose_1-epimerase_activity	2	0.595789	Transcript_043532;Transcript_229106
GO:0090558	P:plant_epidermis_development	2	0.595789	Transcript_182614;Transcript_195263
GO:0006968	P:cellular_defense_response	2	0.595789	Transcript_018502;Transcript_149716
GO:0043407	P:negative_regulation_of_MAP_kinase_activity	2	0.595789	Transcript_027279;Transcript_041445
GO:0080146	F:L-cysteine_desulfhydrase_activity	2	0.595789	Transcript_000030;Transcript_006748
GO:0009432	P:SOS_response	3	0.640228	Transcript_022196;Transcript_026221;Transcript_215297
GO:0035250	F:UDP-galactosyltransferase_activity	2	0.657503	Transcript_180845;Transcript_239329
GO:0043039	P:tRNA_aminoacylation	2	0.657503	Transcript_043282;Transcript_178982
GO:0031462	C:Cul2-RING_ubiquitin_ligase_complex_	2	0.657503	Transcript_083204;Transcript_226584
GO:0030971	F:receptor_tyrosine_kinase_binding	2	0.657503	Transcript_015798;Transcript_142487
GO:0000083	P:regulation_of_transcription_involved_in_G1/S_transition_of_mitotic_cell_cycle	2	0.657503	Transcript_015798;Transcript_142487
GO:0010054	P:trichoblast_differentiation	2	0.700387	Transcript_072587;Transcript_172211
GO:0015865	P:purine_nucleotide_transport	2	0.700387	Transcript_045165;Transcript_233863
GO:0034644	P:cellular_response_to_UV	2	0.700387	Transcript_015798;Transcript_142487
GO:0017151	F:DEAD/H-box_RNA_helicase_binding	2	0.700387	Transcript_167220;Transcript_224847
GO:0035035	F:histone_acetyltransferase_binding	3	0.743344	Transcript_015798;Transcript_142487;Transcript_229005
GO:0006285	P:base-excision_repair,_AP_site_formation	2	0.77749	Transcript_020776;Transcript_143674
GO:0030914	C:STAGA_complex	2	0.77749	Transcript_040271;Transcript_204709
GO:0000224	F:peptide-N4-(N-acetyl-beta-glucosaminyl)asparagine_amidase_activity	2	0.77749	Transcript_018958;Transcript_229796
GO:0042769	P:DNA_damage_response,_detection_of_DNA_damage	2	0.77749	Transcript_015798;Transcript_142487
GO:0010447	P:response_to_acidic_pH	2	0.77749	Transcript_156977;Transcript_224363
GO:0046404	F:ATP-dependent_polydeoxyribonucleotide_5'-hydroxyl-kinase_activity	2	0.77749	Transcript_202654;Transcript_227802
GO:0048666	P:neuron_development	2	0.77749	Transcript_210991;Transcript_229005
GO:0004419	F:hydroxymethylglutaryl-CoA_lyase_activity	2	0.77749	Transcript_016624;Transcript_021346
GO:0033993	P:response_to_lipid	2	0.77749	Transcript_015798;Transcript_142487
GO:0018342	P:protein_prenylation	2	0.77749	Transcript_156161;Transcript_159282
GO:0000256	P:allantoin_catabolic_process	2	0.77749	Transcript_018744;Transcript_229104
GO:0019303	P:D-ribose_catabolic_process	2	0.77749	Transcript_005402;Transcript_227092
GO:0032300	C:mismatch_repair_complex_	2	0.77749	Transcript_172646;Transcript_228895
GO:0033276	C:transcription_factor_TFTC_complex	2	0.77749	Transcript_040271;Transcript_204709
GO:0000749	P:response_to_pheromone_involved_in_conjugation_with_cellular_fusion	3	0.806412	Transcript_004649;Transcript_013734;Transcript_237558
GO:0006271	P:DNA_strand_elongation_involved_in_DNA_replication	3	0.806412	Transcript_015798;Transcript_036736;Transcript_142487
GO:0006297	P:nucleotide-excision_repair,_DNA_gap_filling	3	0.806412	Transcript_015798;Transcript_142487;Transcript_196318
GO:0006084	P:acetyl-CoA_metabolic_process	4	0.826528	Transcript_058180;Transcript_194914;Transcript_229566;Transcript_242079
GO:0009443	P:pyridoxal_5'-phosphate_salvage	4	0.826528	Transcript_040273;Transcript_072587;Transcript_162588;Transcript_172211
GO:0006272	P:leading_strand_elongation	2	1	Transcript_015798;Transcript_142487
GO:0004719	F:protein-L-isoaspartate_(D-aspartate)_O-methyltransferase_activity	2	1	Transcript_031559;Transcript_096298
GO:0004831	F:tyrosine-tRNA_ligase_activity	3	1	Transcript_027485;Transcript_043282;Transcript_178982
GO:0042407	P:cristae_formation	2	1	Transcript_150115;Transcript_198760
GO:0019450	P:L-cysteine_catabolic_process_to_pyruvate	2	1	Transcript_000030;Transcript_006748
GO:0045930	P:negative_regulation_of_mitotic_cell_cycle	2	1	Transcript_016473;Transcript_225726
GO:0051740	F:ethylene_binding	3	1	Transcript_020405;Transcript_196770;Transcript_226660
GO:0043144	P:snoRNA_processing	2	1	Transcript_048008;Transcript_069789
GO:0032201	P:telomere_maintenance_via_semi-conservative_replication	2	1	Transcript_015798;Transcript_142487
GO:0000125	C:PCAF_complex	2	1	Transcript_040271;Transcript_204709
GO:1990052	P:ER_to_chloroplast_lipid_transport	2	1	Transcript_025498;Transcript_153373
GO:0032350	P:regulation_of_hormone_metabolic_process	2	1	Transcript_016473;Transcript_225726
GO:0048025	P:negative_regulation_of_mRNA_splicing,_via_spliceosome	2	1	Transcript_006795;Transcript_210034
GO:0031100	P:organ_regeneration	2	1	Transcript_012262;Transcript_043594
GO:0016274	F:protein-arginine_N-methyltransferase_activity	2	1	Transcript_014508;Transcript_200038
GO:0045740	P:positive_regulation_of_DNA_replication	2	1	Transcript_015798;Transcript_142487
GO:0010992	P:ubiquitin_homeostasis	2	1	Transcript_039672;Transcript_156448
GO:0016584	P:nucleosome_positioning	2	1	Transcript_139660;Transcript_229005
GO:0034196	P:acylglycerol_transport	2	1	Transcript_025498;Transcript_153373
GO:0000722	P:telomere_maintenance_via_recombination	2	1	Transcript_015798;Transcript_142487
GO:0008442	F:3-hydroxyisobutyrate_dehydrogenase_activity	2	1	Transcript_021635;Transcript_149539
GO:0004476	F:mannose-6-phosphate_isomerase_activity_	2	1	Transcript_224440;Transcript_230751
GO:0006437	P:tyrosyl-tRNA_aminoacylation	2	1	Transcript_043282;Transcript_178982
GO:0070182	F:DNA_polymerase_binding	2	1	Transcript_015798;Transcript_142487
GO:0070772	C:PAS_complex	2	1	Transcript_044690;Transcript_234135
GO:0006355	P:regulation_of_transcription,_DNA-templated	133	4.940656e-324	Transcript_000082;Transcript_003302;Transcript_005845;Transcript_006467;Transcript_009704;Transcript_009730;Transcript_009825;Transcript_011939;Transcript_012568;Transcript_013042;Transcript_013172;Transcript_014344;Transcript_014508;Transcript_016024;Transcript_016179;Transcript_016657;Transcript_016698;Transcript_017450;Transcript_018221;Transcript_018802;Transcript_018858;Transcript_020746;Tra…
GO:0046872	F:metal_ion_binding_	212	4.940656e-324	Transcript_001032;Transcript_001865;Transcript_004880;Transcript_005179;Transcript_006923;Transcript_006978;Transcript_007059;Transcript_008396;Transcript_008432;Transcript_008984;Transcript_009203;Transcript_009517;Transcript_009730;Transcript_010467;Transcript_011228;Transcript_011878;Transcript_011923;Transcript_012392;Transcript_013342;Transcript_013781;Transcript_015425;Transcript_015578;Tra…
GO:0009506	C:plasmodesma	84	4.940656e-324	Transcript_002519;Transcript_002810;Transcript_003302;Transcript_005015;Transcript_007448;Transcript_008298;Transcript_008678;Transcript_009970;Transcript_010073;Transcript_010355;Transcript_011264;Transcript_014461;Transcript_018841;Transcript_019060;Transcript_026258;Transcript_029113;Transcript_031041;Transcript_033984;Transcript_034831;Transcript_035390;Transcript_041385;Transcript_045319;Tra…
GO:0005829	C:cytosol	193	4.940656e-324	Transcript_000030;Transcript_000056;Transcript_000223;Transcript_001104;Transcript_002519;Transcript_005015;Transcript_006150;Transcript_006675;Transcript_006748;Transcript_006795;Transcript_006849;Transcript_006923;Transcript_007059;Transcript_007448;Transcript_008582;Transcript_009034;Transcript_009692;Transcript_009745;Transcript_009825;Transcript_010828;Transcript_012987;Transcript_014114;Tra…
GO:0016020	C:membrane	83	9.921631e-311	Transcript_003601;Transcript_005179;Transcript_005449;Transcript_006542;Transcript_006773;Transcript_007473;Transcript_008597;Transcript_012262;Transcript_012807;Transcript_014759;Transcript_016203;Transcript_016567;Transcript_016986;Transcript_018416;Transcript_018511;Transcript_019295;Transcript_020324;Transcript_021257;Transcript_025498;Transcript_026269;Transcript_026681;Transcript_026774;Tra…

## Sheet: GOCC
Category	Description	#Genes	pValue	Genes
GO:0005634	C:nucleus	429	0	Transcript_000082;Transcript_000211;Transcript_000361;Transcript_001104;Transcript_002021;Transcript_002427;Transcript_002519;Transcript_003016;Transcript_003302;Transcript_003601;Transcript_003602;Transcript_004649;Transcript_005135;Transcript_005845;Transcript_006150;Transcript_006195;Transcript_006467;Transcript_006542;Transcript_006557;Transcript_006795;Transcript_006923;Transcript_007694;Tra…
GO:0016021	C:integral_component_of_membrane	417	0	Transcript_000032;Transcript_001031;Transcript_001032;Transcript_001971;Transcript_002169;Transcript_002810;Transcript_003555;Transcript_004469;Transcript_004778;Transcript_004851;Transcript_004905;Transcript_004982;Transcript_005179;Transcript_005630;Transcript_005985;Transcript_006438;Transcript_006721;Transcript_006913;Transcript_007304;Transcript_007414;Transcript_007967;Transcript_008298;Tra…
GO:0005737	C:cytoplasm	289	0	Transcript_001031;Transcript_001256;Transcript_002427;Transcript_002519;Transcript_002621;Transcript_003016;Transcript_003601;Transcript_004649;Transcript_004764;Transcript_004842;Transcript_004843;Transcript_005402;Transcript_006195;Transcript_006236;Transcript_006542;Transcript_006795;Transcript_006978;Transcript_008163;Transcript_008432;Transcript_008582;Transcript_008597;Transcript_009730;Tra…
GO:0005886	C:plasma_membrane	240	0	Transcript_000223;Transcript_001031;Transcript_002021;Transcript_002169;Transcript_002519;Transcript_002675;Transcript_003016;Transcript_006438;Transcript_006795;Transcript_007304;Transcript_007448;Transcript_007967;Transcript_008354;Transcript_008678;Transcript_009556;Transcript_009701;Transcript_009970;Transcript_010355;Transcript_011264;Transcript_011266;Transcript_011923;Transcript_012422;Tra…
GO:0005829	C:cytosol	193	4.940656e-324	Transcript_000030;Transcript_000056;Transcript_000223;Transcript_001104;Transcript_002519;Transcript_005015;Transcript_006150;Transcript_006675;Transcript_006748;Transcript_006795;Transcript_006849;Transcript_006923;Transcript_007059;Transcript_007448;Transcript_008582;Transcript_009034;Transcript_009692;Transcript_009745;Transcript_009825;Transcript_010828;Transcript_012987;Transcript_014114;Tra…
GO:0009507	C:chloroplast	178	0	Transcript_002215;Transcript_002810;Transcript_005179;Transcript_005986;Transcript_006334;Transcript_006370;Transcript_006390;Transcript_007448;Transcript_007473;Transcript_007649;Transcript_008095;Transcript_008323;Transcript_008396;Transcript_008643;Transcript_008882;Transcript_009494;Transcript_010592;Transcript_010828;Transcript_011114;Transcript_013619;Transcript_013672;Transcript_013777;Tra…
GO:0005739	C:mitochondrion	118	0	Transcript_002215;Transcript_002810;Transcript_006390;Transcript_006675;Transcript_007900;Transcript_010828;Transcript_012779;Transcript_015479;Transcript_016540;Transcript_016624;Transcript_016986;Transcript_017394;Transcript_017733;Transcript_017917;Transcript_018331;Transcript_018511;Transcript_018713;Transcript_018784;Transcript_019529;Transcript_020239;Transcript_020553;Transcript_021257;Tra…
GO:0009506	C:plasmodesma	84	4.940656e-324	Transcript_002519;Transcript_002810;Transcript_003302;Transcript_005015;Transcript_007448;Transcript_008298;Transcript_008678;Transcript_009970;Transcript_010073;Transcript_010355;Transcript_011264;Transcript_014461;Transcript_018841;Transcript_019060;Transcript_026258;Transcript_029113;Transcript_031041;Transcript_033984;Transcript_034831;Transcript_035390;Transcript_041385;Transcript_045319;Tra…
GO:0016020	C:membrane	83	9.921631e-311	Transcript_003601;Transcript_005179;Transcript_005449;Transcript_006542;Transcript_006773;Transcript_007473;Transcript_008597;Transcript_012262;Transcript_012807;Transcript_014759;Transcript_016203;Transcript_016567;Transcript_016986;Transcript_018416;Transcript_018511;Transcript_019295;Transcript_020324;Transcript_021257;Transcript_025498;Transcript_026269;Transcript_026681;Transcript_026774;Tra…
GO:0005794	C:Golgi_apparatus	72	2.03851e-275	Transcript_001032;Transcript_001104;Transcript_004469;Transcript_004982;Transcript_005015;Transcript_009757;Transcript_009970;Transcript_010111;Transcript_012422;Transcript_013942;Transcript_014494;Transcript_014681;Transcript_015116;Transcript_015198;Transcript_016567;Transcript_017347;Transcript_018712;Transcript_018757;Transcript_021558;Transcript_022100;Transcript_025995;Transcript_026222;Tra…
GO:0005576	C:extracellular_region	64	3.19189e-212	Transcript_000791;Transcript_001865;Transcript_003497;Transcript_004493;Transcript_005963;Transcript_006795;Transcript_006886;Transcript_008009;Transcript_010073;Transcript_010467;Transcript_014088;Transcript_014798;Transcript_016328;Transcript_024035;Transcript_025932;Transcript_028368;Transcript_031041;Transcript_031290;Transcript_041988;Transcript_042796;Transcript_043767;Transcript_059666;Tra…
GO:0005730	C:nucleolus	63	2.49012e-140	Transcript_003601;Transcript_006390;Transcript_006795;Transcript_007448;Transcript_007868;Transcript_012987;Transcript_014649;Transcript_015425;Transcript_017225;Transcript_017924;Transcript_018940;Transcript_023999;Transcript_026774;Transcript_027323;Transcript_027575;Transcript_029996;Transcript_032315;Transcript_038402;Transcript_041560;Transcript_041888;Transcript_043071;Transcript_044789;Tra…
GO:0005783	C:endoplasmic_reticulum_	62	1.52796e-190	Transcript_001032;Transcript_001104;Transcript_002621;Transcript_004469;Transcript_005449;Transcript_008597;Transcript_010111;Transcript_012422;Transcript_013966;Transcript_014759;Transcript_015578;Transcript_016203;Transcript_016209;Transcript_018164;Transcript_018256;Transcript_018744;Transcript_018841;Transcript_019295;Transcript_020405;Transcript_021558;Transcript_025498;Transcript_025797;Tra…
GO:0005789	C:endoplasmic_reticulum_membrane	58	5.96103e-212	Transcript_009034;Transcript_012422;Transcript_013966;Transcript_014681;Transcript_016203;Transcript_018164;Transcript_018256;Transcript_018920;Transcript_019295;Transcript_020405;Transcript_021285;Transcript_023674;Transcript_026322;Transcript_028401;Transcript_029457;Transcript_032040;Transcript_034041;Transcript_039015;Transcript_041626;Transcript_043014;Transcript_043752;Transcript_045319;Tra…
GO:0000139	C:Golgi_membrane	49	2.50211e-165	Transcript_001032;Transcript_001971;Transcript_002675;Transcript_004469;Transcript_004851;Transcript_004905;Transcript_004982;Transcript_013942;Transcript_027175;Transcript_027303;Transcript_028401;Transcript_033017;Transcript_034534;Transcript_035627;Transcript_035629;Transcript_043014;Transcript_043404;Transcript_043752;Transcript_046845;Transcript_051590;Transcript_058380;Transcript_062135;Tra…
GO:0005618	C:cell_wall_	49	3.12306e-130	Transcript_003497;Transcript_014604;Transcript_014649;Transcript_016328;Transcript_018940;Transcript_025565;Transcript_025932;Transcript_031041;Transcript_032436;Transcript_033984;Transcript_034831;Transcript_050081;Transcript_059666;Transcript_064798;Transcript_069670;Transcript_077461;Transcript_079374;Transcript_090681;Transcript_095767;Transcript_101405;Transcript_105933;Transcript_136126;Tra…
GO:0005774	C:vacuolar_membrane	44	4.28903e-128	Transcript_002675;Transcript_002810;Transcript_006390;Transcript_006675;Transcript_007448;Transcript_012407;Transcript_018525;Transcript_020455;Transcript_029113;Transcript_033984;Transcript_034831;Transcript_038402;Transcript_045319;Transcript_049892;Transcript_089463;Transcript_098323;Transcript_100187;Transcript_102614;Transcript_127987;Transcript_139231;Transcript_144277;Transcript_155268;Tra…
GO:0009570	C:chloroplast_stroma	40	8.70893e-145	Transcript_006334;Transcript_007649;Transcript_008095;Transcript_011114;Transcript_013777;Transcript_014604;Transcript_018511;Transcript_018842;Transcript_020906;Transcript_021247;Transcript_022196;Transcript_023301;Transcript_024497;Transcript_026077;Transcript_026269;Transcript_034344;Transcript_035046;Transcript_035963;Transcript_037644;Transcript_043282;Transcript_047691;Transcript_099844;Tra…
GO:0005743	C:mitochondrial_inner_membrane	40	2.78979e-103	Transcript_002810;Transcript_004880;Transcript_005630;Transcript_009070;Transcript_016315;Transcript_017917;Transcript_021257;Transcript_023555;Transcript_026611;Transcript_026708;Transcript_036083;Transcript_038425;Transcript_039199;Transcript_040111;Transcript_043185;Transcript_045165;Transcript_045337;Transcript_045968;Transcript_057971;Transcript_084246;Transcript_093530;Transcript_150099;Tra…
GO:0009941	C:chloroplast_envelope	40	1.3084e-95	Transcript_007649;Transcript_013672;Transcript_014604;Transcript_015003;Transcript_016721;Transcript_017733;Transcript_018416;Transcript_020906;Transcript_021247;Transcript_023301;Transcript_025498;Transcript_026269;Transcript_026424;Transcript_026760;Transcript_030819;Transcript_032252;Transcript_044327;Transcript_045165;Transcript_047691;Transcript_051101;Transcript_055215;Transcript_078260;Tra…
GO:0005840	C:ribosome_	38	5.77475e-124	Transcript_001111;Transcript_004470;Transcript_006602;Transcript_007649;Transcript_007679;Transcript_013664;Transcript_015971;Transcript_016218;Transcript_017394;Transcript_018528;Transcript_022570;Transcript_022733;Transcript_030297;Transcript_032203;Transcript_033020;Transcript_035138;Transcript_044977;Transcript_053087;Transcript_055969;Transcript_088864;Transcript_122696;Transcript_146844;Tra…
GO:0005773	C:vacuole	37	1.78932e-134	Transcript_002675;Transcript_008678;Transcript_009757;Transcript_012826;Transcript_015927;Transcript_018304;Transcript_018525;Transcript_028795;Transcript_038402;Transcript_041422;Transcript_041560;Transcript_045319;Transcript_050081;Transcript_059666;Transcript_089463;Transcript_098323;Transcript_127606;Transcript_139231;Transcript_144277;Transcript_147891;Transcript_149601;Transcript_154489;Tra…
GO:0048046	C:apoplast_	37	1.43109e-77	Transcript_003701;Transcript_012060;Transcript_012506;Transcript_018514;Transcript_018525;Transcript_018841;Transcript_024129;Transcript_025565;Transcript_033984;Transcript_035581;Transcript_042960;Transcript_044198;Transcript_046112;Transcript_090681;Transcript_098704;Transcript_121426;Transcript_133357;Transcript_142152;Transcript_147921;Transcript_151165;Transcript_152390;Transcript_167488;Tra…
GO:0009535	C:chloroplast_thylakoid_membrane	36	4.03834e-105	Transcript_005179;Transcript_006390;Transcript_009053;Transcript_014604;Transcript_015999;Transcript_016146;Transcript_017733;Transcript_018416;Transcript_026424;Transcript_028942;Transcript_029217;Transcript_032799;Transcript_038206;Transcript_051101;Transcript_079322;Transcript_101984;Transcript_108618;Transcript_142152;Transcript_145533;Transcript_152342;Transcript_155818;Transcript_155928;Tra…
GO:0005654	C:nucleoplasm	35	6.96531e-95	Transcript_006150;Transcript_006542;Transcript_012987;Transcript_015798;Transcript_017329;Transcript_024541;Transcript_031363;Transcript_036736;Transcript_039672;Transcript_041692;Transcript_043478;Transcript_044789;Transcript_046257;Transcript_050421;Transcript_051286;Transcript_057518;Transcript_058642;Transcript_101332;Transcript_128010;Transcript_133402;Transcript_139813;Transcript_142487;Tra…
GO:0070062	C:extracellular_exosome	33	1.23159e-92	Transcript_012262;Transcript_014114;Transcript_015798;Transcript_016571;Transcript_016986;Transcript_018791;Transcript_026452;Transcript_041445;Transcript_042380;Transcript_043532;Transcript_043594;Transcript_046257;Transcript_078776;Transcript_079344;Transcript_088645;Transcript_101433;Transcript_110572;Transcript_120546;Transcript_133402;Transcript_137810;Transcript_142487;Transcript_197714;Tra…
GO:0005874	C:microtubule	27	9.78753e-62	Transcript_001256;Transcript_004764;Transcript_004842;Transcript_009001;Transcript_010889;Transcript_012506;Transcript_016436;Transcript_018082;Transcript_026452;Transcript_029875;Transcript_030679;Transcript_043075;Transcript_045057;Transcript_050497;Transcript_079374;Transcript_103380;Transcript_154820;Transcript_163901;Transcript_168236;Transcript_168591;Transcript_175416;Transcript_179927;Tra…
GO:0005768	C:endosome_	25	1.9472e-106	Transcript_004469;Transcript_004982;Transcript_008354;Transcript_010111;Transcript_021558;Transcript_025995;Transcript_043404;Transcript_044160;Transcript_071779;Transcript_074927;Transcript_076237;Transcript_088132;Transcript_089868;Transcript_096106;Transcript_160512;Transcript_164019;Transcript_170115;Transcript_185131;Transcript_206246;Transcript_218648;Transcript_219802;Transcript_222019;Tra…
GO:0005802	C:trans-Golgi_network	23	7.5685e-89	Transcript_004469;Transcript_004982;Transcript_010111;Transcript_016567;Transcript_021558;Transcript_025370;Transcript_025995;Transcript_040180;Transcript_043404;Transcript_044160;Transcript_074927;Transcript_076237;Transcript_089868;Transcript_145272;Transcript_160512;Transcript_164019;Transcript_170115;Transcript_193394;Transcript_218648;Transcript_219802;Transcript_223263;Transcript_224265;Tra…
GO:0009536	C:plastid	23	4.45547e-53	Transcript_005986;Transcript_008095;Transcript_013672;Transcript_016721;Transcript_017733;Transcript_025498;Transcript_026708;Transcript_027173;Transcript_032252;Transcript_035046;Transcript_041446;Transcript_044327;Transcript_089463;Transcript_098323;Transcript_153373;Transcript_199469;Transcript_222306;Transcript_222323;Transcript_223819;Transcript_231056;Transcript_231533;Transcript_233389;Tra…
GO:0022626	C:cytosolic_ribosome	23	9.17083e-38	Transcript_006390;Transcript_006675;Transcript_007473;Transcript_009505;Transcript_018304;Transcript_026269;Transcript_031909;Transcript_039434;Transcript_049892;Transcript_050081;Transcript_128594;Transcript_131551;Transcript_152161;Transcript_162418;Transcript_180586;Transcript_181757;Transcript_195577;Transcript_197887;Transcript_200901;Transcript_210757;Transcript_212812;Transcript_225057;Tra…
GO:0005777	C:peroxisome	22	6.30286e-52	Transcript_016755;Transcript_018713;Transcript_021257;Transcript_021346;Transcript_021643;Transcript_029830;Transcript_034054;Transcript_036876;Transcript_068167;Transcript_069110;Transcript_079374;Transcript_085323;Transcript_087883;Transcript_120546;Transcript_160618;Transcript_172193;Transcript_200963;Transcript_207612;Transcript_226878;Transcript_235200;Transcript_237775;Transcript_243550
GO:0005615	C:extracellular_space_	21	7.32567e-52	Transcript_002621;Transcript_017329;Transcript_030024;Transcript_032272;Transcript_039672;Transcript_059959;Transcript_077638;Transcript_088203;Transcript_092515;Transcript_095110;Transcript_149814;Transcript_156977;Transcript_157601;Transcript_187190;Transcript_187833;Transcript_201430;Transcript_201752;Transcript_217012;Transcript_219033;Transcript_224193;Transcript_229632
GO:0005622	C:intracellular_	18	6.85997e-57	Transcript_014528;Transcript_023404;Transcript_026221;Transcript_039721;Transcript_043022;Transcript_080040;Transcript_109012;Transcript_113548;Transcript_119088;Transcript_148996;Transcript_152161;Transcript_176002;Transcript_202863;Transcript_224027;Transcript_225913;Transcript_232921;Transcript_237130;Transcript_240214
GO:0005759	C:mitochondrial_matrix_	18	8.7254e-37	Transcript_006675;Transcript_006795;Transcript_007900;Transcript_007938;Transcript_012779;Transcript_016540;Transcript_016624;Transcript_021346;Transcript_022952;Transcript_033844;Transcript_121426;Transcript_186722;Transcript_187190;Transcript_223630;Transcript_230358;Transcript_234175;Transcript_235200;Transcript_237552
GO:0022625	C:cytosolic_large_ribosomal_subunit	18	1.39967e-31	Transcript_007059;Transcript_007473;Transcript_007868;Transcript_009505;Transcript_013258;Transcript_017396;Transcript_026774;Transcript_044835;Transcript_048069;Transcript_049892;Transcript_050081;Transcript_128594;Transcript_162418;Transcript_194845;Transcript_200901;Transcript_210757;Transcript_212812;Transcript_225057
GO:0005681	C:spliceosomal_complex	17	3.3421e-42	Transcript_006849;Transcript_028952;Transcript_033816;Transcript_041888;Transcript_043873;Transcript_048932;Transcript_097610;Transcript_149080;Transcript_159255;Transcript_167985;Transcript_175896;Transcript_191863;Transcript_193507;Transcript_195453;Transcript_208090;Transcript_212567;Transcript_240682
GO:0009579	C:thylakoid	17	6.07545e-38	Transcript_005179;Transcript_006390;Transcript_007448;Transcript_014604;Transcript_018416;Transcript_024497;Transcript_028942;Transcript_044737;Transcript_047691;Transcript_079322;Transcript_101984;Transcript_155928;Transcript_166804;Transcript_219776;Transcript_226817;Transcript_231533;Transcript_234806
GO:0031969	C:chloroplast_membrane_	15	3.42953e-39	Transcript_007414;Transcript_009381;Transcript_013672;Transcript_015003;Transcript_016721;Transcript_042298;Transcript_044327;Transcript_153952;Transcript_155268;Transcript_170559;Transcript_172794;Transcript_199362;Transcript_203659;Transcript_230685;Transcript_235192
GO:0009505	C:plant-type_cell_wall	12	1.38074e-46	Transcript_008678;Transcript_010073;Transcript_031041;Transcript_033984;Transcript_045319;Transcript_050536;Transcript_153867;Transcript_169480;Transcript_183278;Transcript_196627;Transcript_202863;Transcript_222950
GO:0031225	C:anchored_component_of_membrane_	12	7.93721e-46	Transcript_000434;Transcript_008678;Transcript_012826;Transcript_020100;Transcript_033984;Transcript_041922;Transcript_079927;Transcript_093665;Transcript_176122;Transcript_183278;Transcript_231204;Transcript_242191
GO:0022627	C:cytosolic_small_ribosomal_subunit_	12	1.00428e-26	Transcript_018304;Transcript_039229;Transcript_039434;Transcript_110572;Transcript_125114;Transcript_180586;Transcript_195577;Transcript_197887;Transcript_212902;Transcript_222784;Transcript_232915;Transcript_242229
GO:0005875	C:microtubule_associated_complex	12	2.63312e-16	Transcript_048069;Transcript_059959;Transcript_081381;Transcript_109626;Transcript_156448;Transcript_186849;Transcript_188701;Transcript_189533;Transcript_211478;Transcript_225114;Transcript_233284;Transcript_237552
GO:0000786	C:nucleosome	12	4.8373e-16	Transcript_007448;Transcript_015927;Transcript_031079;Transcript_044768;Transcript_130510;Transcript_161679;Transcript_185779;Transcript_199370;Transcript_219776;Transcript_221310;Transcript_229840;Transcript_232594
GO:0048471	C:perinuclear_region_of_cytoplasm	11	1.30399e-22	Transcript_002621;Transcript_008597;Transcript_014759;Transcript_016203;Transcript_022100;Transcript_036736;Transcript_040271;Transcript_108981;Transcript_192590;Transcript_194884;Transcript_223956
GO:0005811	C:lipid_particle	11	3.49088e-16	Transcript_002621;Transcript_026611;Transcript_042963;Transcript_043185;Transcript_059959;Transcript_109626;Transcript_149539;Transcript_149814;Transcript_184894;Transcript_226282;Transcript_237552
GO:0031966	C:mitochondrial_membrane	11	6.65666e-15	Transcript_026424;Transcript_033063;Transcript_042104;Transcript_042963;Transcript_063605;Transcript_198631;Transcript_198760;Transcript_219022;Transcript_222677;Transcript_238422;Transcript_241709
GO:0005887	C:integral_component_of_plasma_membrane_	10	1.63538e-59	Transcript_002384;Transcript_042104;Transcript_063605;Transcript_079344;Transcript_083711;Transcript_085884;Transcript_097145;Transcript_100187;Transcript_184894;Transcript_213817
GO:0005856	C:cytoskeleton	10	1.62801e-46	Transcript_020276;Transcript_028401;Transcript_123266;Transcript_148998;Transcript_169370;Transcript_172827;Transcript_189744;Transcript_226013;Transcript_226379;Transcript_232900
GO:0009534	C:chloroplast_thylakoid	10	2.7073e-44	Transcript_005179;Transcript_018416;Transcript_024497;Transcript_028942;Transcript_044737;Transcript_047691;Transcript_051101;Transcript_101984;Transcript_155928;Transcript_187753
GO:0009524	C:phragmoplast	10	5.27128e-38	Transcript_009001;Transcript_048706;Transcript_061518;Transcript_149776;Transcript_154200;Transcript_169370;Transcript_175416;Transcript_189744;Transcript_199471;Transcript_227602
GO:0000502	C:proteasome_complex	10	5.59766e-36	Transcript_002519;Transcript_009825;Transcript_018525;Transcript_022485;Transcript_031618;Transcript_078776;Transcript_131551;Transcript_171325;Transcript_188712;Transcript_226114
GO:0005635	C:nuclear_envelope	10	1.10771e-25	Transcript_002621;Transcript_014649;Transcript_018940;Transcript_025598;Transcript_149508;Transcript_158395;Transcript_232525;Transcript_235418;Transcript_241108;Transcript_243146
GO:0030529	C:ribonucleoprotein_complex	10	6.33485e-22	Transcript_009704;Transcript_013172;Transcript_023301;Transcript_026077;Transcript_027323;Transcript_193507;Transcript_208090;Transcript_225044;Transcript_226817;Transcript_231660
GO:0031902	C:late_endosome_membrane	10	1.4137e-19	Transcript_015947;Transcript_025370;Transcript_027057;Transcript_039015;Transcript_041422;Transcript_062135;Transcript_161644;Transcript_225636;Transcript_237969;Transcript_244423
GO:0005871	C:kinesin_complex	10	3.97117e-19	Transcript_001256;Transcript_009001;Transcript_016377;Transcript_050497;Transcript_154820;Transcript_163901;Transcript_175416;Transcript_183925;Transcript_199471;Transcript_227602
GO:0005747	C:mitochondrial_respiratory_chain_complex_I_	10	2.43473e-14	Transcript_018784;Transcript_023779;Transcript_033063;Transcript_038402;Transcript_058642;Transcript_121426;Transcript_198631;Transcript_230655;Transcript_239152;Transcript_241845
GO:0070469	C:respiratory_chain	9	8.83809e-28	Transcript_004880;Transcript_005630;Transcript_016315;Transcript_017917;Transcript_020239;Transcript_036083;Transcript_152859;Transcript_219022;Transcript_236234
GO:0005769	C:early_endosome	9	8.42024e-12	Transcript_016473;Transcript_035629;Transcript_081763;Transcript_095467;Transcript_145272;Transcript_193877;Transcript_206246;Transcript_225726;Transcript_233014
GO:0010008	C:endosome_membrane_	8	4.85454e-42	Transcript_021558;Transcript_041422;Transcript_088132;Transcript_089868;Transcript_169723;Transcript_222019;Transcript_234135;Transcript_240304
GO:0046658	C:anchored_component_of_plasma_membrane	8	9.0192e-35	Transcript_000434;Transcript_008678;Transcript_012826;Transcript_022530;Transcript_033984;Transcript_176122;Transcript_183278;Transcript_242191
GO:0016607	C:nuclear_speck	8	5.28137e-34	Transcript_032972;Transcript_033017;Transcript_034660;Transcript_051286;Transcript_097610;Transcript_167985;Transcript_195453;Transcript_235950
GO:0009706	C:chloroplast_inner_membrane	8	1.73421e-25	Transcript_004155;Transcript_013575;Transcript_032252;Transcript_045640;Transcript_078260;Transcript_171704;Transcript_221914;Transcript_222323
GO:0043231	C:intracellular_membrane-bounded_organelle_	8	7.15385e-25	Transcript_015116;Transcript_021257;Transcript_036736;Transcript_044539;Transcript_156977;Transcript_176865;Transcript_219033;Transcript_236505
GO:0005788	C:endoplasmic_reticulum_lumen	7	3.58729e-25	Transcript_002621;Transcript_029746;Transcript_040960;Transcript_149814;Transcript_160512;Transcript_181616;Transcript_235388
GO:0000932	C:cytoplasmic_mRNA_processing_body	7	2.85053e-17	Transcript_014461;Transcript_032972;Transcript_158530;Transcript_180390;Transcript_191361;Transcript_212567;Transcript_214662
GO:0005778	C:peroxisomal_membrane	7	1.02385e-13	Transcript_018317;Transcript_021257;Transcript_029830;Transcript_036876;Transcript_082198;Transcript_162000;Transcript_207612
GO:0009523	C:photosystem_II	7	1.59832e-12	Transcript_005179;Transcript_018416;Transcript_038206;Transcript_145533;Transcript_152342;Transcript_155928;Transcript_201460
GO:0005813	C:centrosome_	7	4.09966e-12	Transcript_015798;Transcript_018082;Transcript_023704;Transcript_036736;Transcript_142487;Transcript_186849;Transcript_227797
GO:0005765	C:lysosomal_membrane	7	1.12842e-11	Transcript_015947;Transcript_027057;Transcript_041445;Transcript_206246;Transcript_208179;Transcript_225082;Transcript_225636
GO:0016592	C:mediator_complex_	7	2.18508e-10	Transcript_019060;Transcript_082888;Transcript_093644;Transcript_108837;Transcript_227996;Transcript_232598;Transcript_243354
GO:0009705	C:plant-type_vacuole_membrane	6	1.29162e-37	Transcript_017321;Transcript_042300;Transcript_062728;Transcript_100187;Transcript_109378;Transcript_199402
GO:0012505	C:endomembrane_system	6	3.05808e-26	Transcript_002621;Transcript_012422;Transcript_027691;Transcript_149814;Transcript_193394;Transcript_234643
GO:0005764	C:lysosome	6	1.5079e-22	Transcript_023068;Transcript_025674;Transcript_077638;Transcript_156977;Transcript_201430;Transcript_235663
GO:0031201	C:SNARE_complex	6	9.00747e-20	Transcript_025370;Transcript_039015;Transcript_041422;Transcript_161644;Transcript_193394;Transcript_234643
GO:0005741	C:mitochondrial_outer_membrane_	6	3.18584e-17	Transcript_019608;Transcript_026708;Transcript_039199;Transcript_050536;Transcript_150115;Transcript_169480
GO:0043234	C:protein_complex	6	5.75586e-15	Transcript_018920;Transcript_138366;Transcript_138761;Transcript_187629;Transcript_188939;Transcript_208901
GO:0005694	C:chromosome_	6	5.64142e-11	Transcript_009537;Transcript_044742;Transcript_155807;Transcript_186849;Transcript_224710;Transcript_231829
GO:0005905	C:coated_pit_	6	2.89654e-10	Transcript_022145;Transcript_033018;Transcript_033908;Transcript_043468;Transcript_101433;Transcript_178285
GO:0030136	C:clathrin-coated_vesicle_	6	5.66191e-10	Transcript_011266;Transcript_033018;Transcript_178285;Transcript_184894;Transcript_193877;Transcript_243720
GO:0032040	C:small-subunit_processome	6	2.11044e-08	Transcript_003601;Transcript_104913;Transcript_129702;Transcript_205205;Transcript_229956;Transcript_239729
GO:0030665	C:clathrin-coated_vesicle_membrane_	6	0.000460323	Transcript_018757;Transcript_062135;Transcript_156026;Transcript_187119;Transcript_237969;Transcript_244423
GO:0005819	C:spindle	5	1.17136e-21	Transcript_015116;Transcript_044539;Transcript_061518;Transcript_149776;Transcript_154200
GO:0000785	C:chromatin_	5	1.01833e-18	Transcript_024766;Transcript_031363;Transcript_043402;Transcript_185779;Transcript_194992
GO:0009543	C:chloroplast_thylakoid_lumen_	5	6.86988e-17	Transcript_011737;Transcript_024497;Transcript_079322;Transcript_162207;Transcript_198102
GO:0010287	C:plastoglobule	5	2.87154e-16	Transcript_005179;Transcript_016897;Transcript_021772;Transcript_045938;Transcript_155928
GO:0019898	C:extrinsic_component_of_membrane	5	5.8924e-16	Transcript_024497;Transcript_079322;Transcript_096106;Transcript_168591;Transcript_174990
GO:0080008	C:Cul4-RING_E3_ubiquitin_ligase_complex	5	5.39735e-14	Transcript_034660;Transcript_079296;Transcript_083204;Transcript_129702;Transcript_143265
GO:0009522	C:photosystem_I	5	1.43588e-13	Transcript_005179;Transcript_015999;Transcript_018416;Transcript_145533;Transcript_155928
GO:0033290	C:eukaryotic_48S_preinitiation_complex	5	6.75713e-12	Transcript_031078;Transcript_042437;Transcript_148931;Transcript_224747;Transcript_235250
GO:0016282	C:eukaryotic_43S_preinitiation_complex_	5	8.85708e-12	Transcript_031078;Transcript_042437;Transcript_148931;Transcript_224747;Transcript_235250
GO:0005852	C:eukaryotic_translation_initiation_factor_3_complex	5	1.75891e-11	Transcript_031078;Transcript_042437;Transcript_148931;Transcript_224747;Transcript_235250
GO:0005815	C:microtubule_organizing_center	5	2.02528e-06	Transcript_015116;Transcript_033017;Transcript_044539;Transcript_189533;Transcript_205336
GO:0005685	C:U1_snRNP	5	4.86897e-05	Transcript_006849;Transcript_033816;Transcript_051286;Transcript_191863;Transcript_240682
GO:0000407	C:pre-autophagosomal_structure	5	0.000174602	Transcript_015783;Transcript_168591;Transcript_170081;Transcript_197462;Transcript_238103
GO:0000794	C:condensed_nuclear_chromosome_	5	0.00056808	Transcript_061518;Transcript_081381;Transcript_149776;Transcript_225114;Transcript_229956
GO:0032580	C:Golgi_cisterna_membrane	4	7.72098e-20	Transcript_021186;Transcript_144405;Transcript_180845;Transcript_184894
GO:0071013	C:catalytic_step_2_spliceosome_	4	2.96895e-18	Transcript_153181;Transcript_159255;Transcript_188701;Transcript_241730
GO:0005623	C:cell_	4	9.88909e-17	Transcript_018740;Transcript_020324;Transcript_025510;Transcript_065403
GO:0030176	C:integral_component_of_endoplasmic_reticulum_membrane	4	2.21585e-13	Transcript_019295;Transcript_197170;Transcript_232885;Transcript_243848
GO:0005770	C:late_endosome	4	2.64305e-12	Transcript_016473;Transcript_206246;Transcript_222407;Transcript_225726
GO:0009707	C:chloroplast_outer_membrane_	4	2.64305e-12	Transcript_025498;Transcript_041446;Transcript_153373;Transcript_239329
GO:0031977	C:thylakoid_lumen	4	5.39362e-12	Transcript_011737;Transcript_024497;Transcript_028942;Transcript_079322
GO:0015935	C:small_ribosomal_subunit	4	1.01702e-11	Transcript_081223;Transcript_142689;Transcript_228502;Transcript_236663
GO:0005665	C:DNA-directed_RNA_polymerase_II,_core_complex_	4	3.35747e-10	Transcript_093018;Transcript_150478;Transcript_177859;Transcript_180390
GO:0009501	C:amyloplast_	4	9.68554e-10	Transcript_008643;Transcript_040039;Transcript_041688;Transcript_232764
GO:0000159	C:protein_phosphatase_type_2A_complex	4	2.03e-07	Transcript_015425;Transcript_023274;Transcript_093206;Transcript_128635
GO:0042470	C:melanosome	4	4.00388e-07	Transcript_003016;Transcript_193507;Transcript_208090;Transcript_242079
GO:0019773	C:proteasome_core_complex,_alpha-subunit_complex	4	1.47272e-06	Transcript_002519;Transcript_008163;Transcript_131551;Transcript_213671
GO:0045261	C:proton-transporting_ATP_synthase_complex,_catalytic_core_F(1)	4	1.5651e-06	Transcript_023555;Transcript_026611;Transcript_043185;Transcript_201255
GO:0033179	C:proton-transporting_V-type_ATPase,_V0_domain	4	3.84477e-05	Transcript_009757;Transcript_080670;Transcript_168752;Transcript_230521
GO:0008540	C:proteasome_regulatory_particle,_base_subcomplex	4	0.000101094	Transcript_191303;Transcript_226114;Transcript_234735;Transcript_241708
GO:0000148	C:1,3-beta-D-glucan_synthase_complex_	4	0.000139587	Transcript_061772;Transcript_149561;Transcript_155810;Transcript_194193
GO:0005669	C:transcription_factor_TFIID_complex	4	0.00582867	Transcript_002021;Transcript_040271;Transcript_054599;Transcript_204709
GO:0043596	C:nuclear_replication_fork	4	0.0971681	Transcript_015798;Transcript_041712;Transcript_142487;Transcript_210615
GO:0031965	C:nuclear_membrane_	3	1.94977e-25	Transcript_026322;Transcript_118749;Transcript_158395
GO:0005643	C:nuclear_pore	3	2.12594e-17	Transcript_118749;Transcript_158395;Transcript_199146
GO:0005758	C:mitochondrial_intermembrane_space	3	7.42826e-16	Transcript_009517;Transcript_018784;Transcript_213719
GO:0005938	C:cell_cortex_	3	5.3994e-10	Transcript_012807;Transcript_096671;Transcript_191165
GO:0016459	C:myosin_complex_	3	2.3994e-08	Transcript_017736;Transcript_042212;Transcript_191165
GO:0005801	C:cis-Golgi_network_	3	3.41485e-08	Transcript_001104;Transcript_015783;Transcript_089868
GO:0016023	C:cytoplasmic_membrane-bounded_vesicle	3	4.86213e-08	Transcript_015818;Transcript_047156;Transcript_179106
GO:0005578	C:proteinaceous_extracellular_matrix	3	9.1646e-08	Transcript_014973;Transcript_156289;Transcript_197673
GO:0005732	C:small_nucleolar_ribonucleoprotein_complex	3	9.86852e-08	Transcript_003601;Transcript_086503;Transcript_212567
GO:0009532	C:plastid_stroma	3	1.29193e-07	Transcript_035318;Transcript_047691;Transcript_204604
GO:0009986	C:cell_surface_	3	1.82207e-07	Transcript_006795;Transcript_039672;Transcript_079344
GO:0000922	C:spindle_pole	3	1.44737e-06	Transcript_002427;Transcript_029875;Transcript_157447
GO:0016363	C:nuclear_matrix	3	2.89688e-06	Transcript_149508;Transcript_227686;Transcript_236505
GO:0005666	C:DNA-directed_RNA_polymerase_III_complex	3	5.40643e-06	Transcript_012987;Transcript_093018;Transcript_150478
GO:0030127	C:COPII_vesicle_coat_	3	1.4866e-05	Transcript_043014;Transcript_222954;Transcript_223956
GO:0000228	C:nuclear_chromosome	3	2.08412e-05	Transcript_172646;Transcript_208085;Transcript_228895
GO:0044732	C:mitotic_spindle_pole_body_	3	2.92265e-05	Transcript_018920;Transcript_023060;Transcript_167806
GO:0030018	C:Z_disc	3	0.000113253	Transcript_027666;Transcript_081381;Transcript_225114
GO:0031012	C:extracellular_matrix_	3	0.000113253	Transcript_005963;Transcript_093665;Transcript_197673
GO:0005885	C:Arp2/3_protein_complex_	3	0.000149693	Transcript_197714;Transcript_238919;Transcript_239448
GO:0046540	C:U4/U6_x_U5_tri-snRNP_complex	3	0.000158924	Transcript_043873;Transcript_182308;Transcript_212567
GO:0033116	C:endoplasmic_reticulum-Golgi_intermediate_compartment_membrane	3	0.00020777	Transcript_014681;Transcript_184894;Transcript_222954
GO:0005749	C:mitochondrial_respiratory_chain_complex_II,_succinate_dehydrogenase_complex_(ubiquinone)_	3	0.000288428	Transcript_089463;Transcript_098323;Transcript_222306
GO:0045273	C:respiratory_chain_complex_II	3	0.00055599	Transcript_089463;Transcript_098323;Transcript_222306
GO:0042651	C:thylakoid_membrane	3	0.00271515	Transcript_017733;Transcript_171704;Transcript_225703
GO:0030663	C:COPI-coated_vesicle_membrane_	3	0.0028604	Transcript_031747;Transcript_044971;Transcript_196018
GO:0005782	C:peroxisomal_matrix_	3	0.00699613	Transcript_021257;Transcript_039672;Transcript_158550
GO:0042645	C:mitochondrial_nucleoid	3	0.0131077	Transcript_016986;Transcript_203816;Transcript_244675
GO:0005687	C:U4_snRNP	3	0.0179115	Transcript_006849;Transcript_033816;Transcript_191863
GO:0000784	C:nuclear_chromosome,_telomeric_region	3	0.0235345	Transcript_041712;Transcript_171515;Transcript_185779
GO:0000347	C:THO_complex	3	0.0235345	Transcript_149744;Transcript_208937;Transcript_220063
GO:0030117	C:membrane_coat	3	0.0235345	Transcript_018757;Transcript_044971;Transcript_156026
GO:0033588	C:Elongator_holoenzyme_complex	3	0.0235345	Transcript_018802;Transcript_034176;Transcript_191437
GO:0030017	C:sarcomere	3	0.0317618	Transcript_081381;Transcript_217583;Transcript_225114
GO:0031674	C:I_band	3	0.0317618	Transcript_016203;Transcript_081381;Transcript_225114
GO:0000974	C:Prp19_complex	3	0.103488	Transcript_028952;Transcript_193507;Transcript_208090
GO:0031461	C:cullin-RING_ubiquitin_ligase_complex_	3	0.138001	Transcript_046257;Transcript_061518;Transcript_149776
GO:0030015	C:CCR4-NOT_core_complex_	3	0.177343	Transcript_004649;Transcript_013734;Transcript_237558
GO:0034719	C:SMN-Sm_protein_complex	3	0.233088	Transcript_006849;Transcript_033816;Transcript_191863
GO:0034709	C:methylosome	3	0.233088	Transcript_006849;Transcript_033816;Transcript_191863
GO:0005746	C:mitochondrial_respiratory_chain	3	0.304804	Transcript_022558;Transcript_096433;Transcript_198631
GO:0035097	C:histone_methyltransferase_complex_	3	0.304804	Transcript_183851;Transcript_199156;Transcript_229005
GO:0034715	C:pICln-Sm_protein_complex	3	0.395921	Transcript_006849;Transcript_033816;Transcript_191863
GO:0030659	C:cytoplasmic_vesicle_membrane_	2	1.26732e-12	Transcript_165277;Transcript_224039
GO:0005839	C:proteasome_core_complex	2	1.83327e-12	Transcript_018525;Transcript_227452
GO:0005925	C:focal_adhesion	2	9.00167e-11	Transcript_110572;Transcript_197714
GO:0000775	C:chromosome,_centromeric_region_	2	1.86571e-10	Transcript_027488;Transcript_208085
GO:0046930	C:pore_complex	2	1.86571e-10	Transcript_019608;Transcript_231056
GO:0016324	C:apical_plasma_membrane	2	3.87364e-10	Transcript_009286;Transcript_185415
GO:0043025	C:neuronal_cell_body	2	7.3777e-10	Transcript_002621;Transcript_139813
GO:0015934	C:large_ribosomal_subunit_	2	7.3777e-10	Transcript_006434;Transcript_049278
GO:0000419	C:DNA-directed_RNA_polymerase_V_complex	2	8.05592e-10	Transcript_093018;Transcript_150478
GO:0009654	C:photosystem_II_oxygen_evolving_complex	2	5.45556e-08	Transcript_024497;Transcript_079322
GO:0030131	C:clathrin_adaptor_complex_	2	7.83055e-08	Transcript_101433;Transcript_187119
GO:0012507	C:ER_to_Golgi_transport_vesicle_membrane	2	4.26452e-07	Transcript_039015;Transcript_161644
GO:0015629	C:actin_cytoskeleton_	2	8.64424e-07	Transcript_019534;Transcript_197714
GO:0005762	C:mitochondrial_large_ribosomal_subunit_	2	8.64424e-07	Transcript_137860;Transcript_193305
GO:0005736	C:DNA-directed_RNA_polymerase_I_complex_	2	1.75507e-06	Transcript_093018;Transcript_150478
GO:0000790	C:nuclear_chromatin	2	1.75507e-06	Transcript_041712;Transcript_139660
GO:0000815	C:ESCRT_III_complex_	2	2.50224e-06	Transcript_188871;Transcript_222407
GO:0045263	C:proton-transporting_ATP_synthase_complex,_coupling_factor_F(o)	2	3.56878e-06	Transcript_042963;Transcript_141694
GO:0005838	C:proteasome_regulatory_particle	2	5.09159e-06	Transcript_078776;Transcript_226114
GO:0000418	C:DNA-directed_RNA_polymerase_IV_complex	2	1.03729e-05	Transcript_093018;Transcript_177859
GO:0072686	C:mitotic_spindle	2	1.37084e-05	Transcript_018082;Transcript_228720
GO:0000421	C:autophagosome_membrane_	2	1.37084e-05	Transcript_168591;Transcript_242610
GO:0031597	C:cytosolic_proteasome_complex_	2	5.47353e-05	Transcript_234735;Transcript_241708
GO:0000781	C:chromosome,_telomeric_region_	2	0.000219535	Transcript_023610;Transcript_044881
GO:0034707	C:chloride_channel_complex_	2	0.000219535	Transcript_043022;Transcript_062728
GO:0031595	C:nuclear_proteasome_complex	2	0.000219535	Transcript_234735;Transcript_241708
GO:0034399	C:nuclear_periphery	2	0.000310795	Transcript_158395;Transcript_191303
GO:0071004	C:U2-type_prespliceosome	2	0.000439998	Transcript_009745;Transcript_147408
GO:0000326	C:protein_storage_vacuole	2	0.000622862	Transcript_004905;Transcript_181413
GO:0005753	C:mitochondrial_proton-transporting_ATP_synthase_complex	2	0.000622862	Transcript_006390;Transcript_141694
GO:0055037	C:recycling_endosome	2	0.000817154	Transcript_016473;Transcript_225726
GO:0009317	C:acetyl-CoA_carboxylase_complex_	2	0.00114453	Transcript_233389;Transcript_235657
GO:0009295	C:nucleoid	2	0.00160318	Transcript_044737;Transcript_187753
GO:0005834	C:heterotrimeric_G-protein_complex	2	0.00224556	Transcript_012392;Transcript_159282
GO:0005797	C:Golgi_medial_cisterna	2	0.00314496	Transcript_089868;Transcript_180845
GO:0042555	C:MCM_complex	2	0.00314496	Transcript_036736;Transcript_041712
GO:0005849	C:mRNA_cleavage_factor_complex	2	0.00440347	Transcript_025855;Transcript_222390
GO:0005851	C:eukaryotic_translation_initiation_factor_2B_complex	2	0.00616304	Transcript_016560;Transcript_136358
GO:0042644	C:chloroplast_nucleoid	2	0.00862044	Transcript_044737;Transcript_143674
GO:0005763	C:mitochondrial_small_ribosomal_subunit	2	0.0114486	Transcript_126398;Transcript_156647
GO:0032586	C:protein_storage_vacuole_membrane	2	0.0114486	Transcript_004905;Transcript_181413
GO:0033281	C:TAT_protein_transport_complex	2	0.0120475	Transcript_016146;Transcript_083711
GO:0031463	C:Cul3-RING_ubiquitin_ligase_complex_	2	0.0158279	Transcript_031835;Transcript_083204
GO:0030658	C:transport_vesicle_membrane	2	0.0218705	Transcript_027098;Transcript_158532
GO:0033178	C:proton-transporting_two-sector_ATPase_complex,_catalytic_domain_	2	0.057345	Transcript_004585;Transcript_235352
GO:0045169	C:fusome	2	0.057345	Transcript_002621;Transcript_149814
GO:0070531	C:BRCA1-A_complex_	2	0.057345	Transcript_037498;Transcript_212191
GO:0000243	C:commitment_complex_	2	0.057345	Transcript_009745;Transcript_147408
GO:0016529	C:sarcoplasmic_reticulum	2	0.0788008	Transcript_016203;Transcript_026322
GO:0000813	C:ESCRT_I_complex_	2	0.104294	Transcript_040180;Transcript_212485
GO:0033017	C:sarcoplasmic_reticulum_membrane	2	0.107984	Transcript_016203;Transcript_026322
GO:0005663	C:DNA_replication_factor_C_complex_	2	0.107984	Transcript_015798;Transcript_142487
GO:0005863	C:striated_muscle_myosin_thick_filament	2	0.141419	Transcript_081381;Transcript_225114
GO:0070557	C:PCNA-p21_complex	2	0.160589	Transcript_015798;Transcript_142487
GO:0043626	C:PCNA_complex	2	0.160589	Transcript_015798;Transcript_142487
GO:0043078	C:polar_nucleus	2	0.19126	Transcript_082888;Transcript_243354
GO:0019028	C:viral_capsid_	2	0.257725	Transcript_043263;Transcript_149903
GO:0030008	C:TRAPP_complex	2	0.345502	Transcript_001104;Transcript_015783
GO:0030122	C:AP-2_adaptor_complex_	2	0.459823	Transcript_027502;Transcript_043468
GO:0031462	C:Cul2-RING_ubiquitin_ligase_complex_	2	0.657503	Transcript_083204;Transcript_226584
GO:0030914	C:STAGA_complex	2	0.77749	Transcript_040271;Transcript_204709
GO:0032300	C:mismatch_repair_complex_	2	0.77749	Transcript_172646;Transcript_228895
GO:0033276	C:transcription_factor_TFTC_complex	2	0.77749	Transcript_040271;Transcript_204709
GO:0000125	C:PCAF_complex	2	1	Transcript_040271;Transcript_204709
GO:0070772	C:PAS_complex	2	1	Transcript_044690;Transcript_234135

## Sheet: GOMF
Category	Description	#Genes	pValue	Genes
GO:0005524	F:ATP_binding	363	0	Transcript_000223;Transcript_000361;Transcript_000724;Transcript_001256;Transcript_001691;Transcript_002169;Transcript_003016;Transcript_003555;Transcript_004963;Transcript_004977;Transcript_005402;Transcript_006132;Transcript_006195;Transcript_006438;Transcript_006675;Transcript_006978;Transcript_007304;Transcript_007382;Transcript_007414;Transcript_007427;Transcript_007967;Transcript_008009;Tra…
GO:0046872	F:metal_ion_binding_	212	4.940656e-324	Transcript_001032;Transcript_001865;Transcript_004880;Transcript_005179;Transcript_006923;Transcript_006978;Transcript_007059;Transcript_008396;Transcript_008432;Transcript_008984;Transcript_009203;Transcript_009517;Transcript_009730;Transcript_010467;Transcript_011228;Transcript_011878;Transcript_011923;Transcript_012392;Transcript_013342;Transcript_013781;Transcript_015425;Transcript_015578;Tra…
GO:0003677	F:DNA_binding	163	0	Transcript_000082;Transcript_002021;Transcript_006467;Transcript_006557;Transcript_007448;Transcript_007694;Transcript_008432;Transcript_012568;Transcript_012987;Transcript_013042;Transcript_014461;Transcript_015927;Transcript_016001;Transcript_016179;Transcript_016420;Transcript_016698;Transcript_018221;Transcript_018858;Transcript_019885;Transcript_020746;Transcript_022974;Transcript_023060;Tra…
GO:0008270	F:zinc_ion_binding	124	0	Transcript_000056;Transcript_004905;Transcript_005845;Transcript_006390;Transcript_008823;Transcript_009537;Transcript_009745;Transcript_012987;Transcript_013777;Transcript_014344;Transcript_014461;Transcript_014881;Transcript_016420;Transcript_016689;Transcript_018841;Transcript_018842;Transcript_019935;Transcript_020276;Transcript_021152;Transcript_021851;Transcript_021957;Transcript_022952;Tra…
GO:0003700	F:sequence-specific_DNA_binding_transcription_factor_activity	90	7.15816e-268	Transcript_005135;Transcript_006542;Transcript_006557;Transcript_007694;Transcript_008176;Transcript_009760;Transcript_011939;Transcript_016001;Transcript_016179;Transcript_016420;Transcript_016473;Transcript_016601;Transcript_018221;Transcript_019684;Transcript_023646;Transcript_025821;Transcript_027814;Transcript_027836;Transcript_028211;Transcript_028447;Transcript_030819;Transcript_030836;Tra…
GO:0004674	F:protein_serine/threonine_kinase_activity	75	1.00839e-233	Transcript_000361;Transcript_002169;Transcript_006438;Transcript_007427;Transcript_007967;Transcript_008009;Transcript_010355;Transcript_012506;Transcript_012807;Transcript_014161;Transcript_014265;Transcript_015942;Transcript_015977;Transcript_016625;Transcript_016831;Transcript_018502;Transcript_019367;Transcript_019961;Transcript_020405;Transcript_027687;Transcript_030740;Transcript_031338;Tra…
GO:0003723	F:RNA_binding	74	2.47032e-206	Transcript_001691;Transcript_006307;Transcript_008432;Transcript_009730;Transcript_011484;Transcript_011878;Transcript_013172;Transcript_014461;Transcript_016657;Transcript_019885;Transcript_020362;Transcript_024178;Transcript_025598;Transcript_026077;Transcript_026515;Transcript_026774;Transcript_028833;Transcript_029924;Transcript_032972;Transcript_036952;Transcript_041888;Transcript_043282;Tra…
GO:0003735	F:structural_constituent_of_ribosome	68	1.84547e-193	Transcript_001111;Transcript_004470;Transcript_006434;Transcript_006602;Transcript_007059;Transcript_007649;Transcript_007679;Transcript_009505;Transcript_013258;Transcript_013664;Transcript_015971;Transcript_016218;Transcript_017394;Transcript_017396;Transcript_018304;Transcript_018528;Transcript_022570;Transcript_022733;Transcript_026269;Transcript_026774;Transcript_030297;Transcript_032203;Tra…
GO:0005525	F:GTP_binding	48	1.04125e-122	Transcript_002675;Transcript_004764;Transcript_004842;Transcript_004843;Transcript_008354;Transcript_010526;Transcript_012392;Transcript_016567;Transcript_016986;Transcript_017225;Transcript_017347;Transcript_018712;Transcript_023404;Transcript_027057;Transcript_030679;Transcript_041446;Transcript_041684;Transcript_042217;Transcript_043075;Transcript_043875;Transcript_044858;Transcript_045057;Tra…
GO:0016874	F:ligase_activity	44	1.01887e-140	Transcript_008202;Transcript_008597;Transcript_014512;Transcript_014759;Transcript_014881;Transcript_016689;Transcript_025456;Transcript_029089;Transcript_030009;Transcript_032532;Transcript_034047;Transcript_041558;Transcript_044014;Transcript_069110;Transcript_090430;Transcript_100197;Transcript_106058;Transcript_122229;Transcript_123520;Transcript_123857;Transcript_131389;Transcript_153091;Tra…
GO:0005506	F:iron_ion_binding	38	3.87609e-78	Transcript_006542;Transcript_018164;Transcript_018331;Transcript_020455;Transcript_021247;Transcript_023674;Transcript_024085;Transcript_024375;Transcript_028047;Transcript_029457;Transcript_034041;Transcript_036083;Transcript_040997;Transcript_042298;Transcript_043681;Transcript_044496;Transcript_052099;Transcript_052466;Transcript_090971;Transcript_094008;Transcript_095790;Transcript_114216;Tra…
GO:0005509	F:calcium_ion_binding	36	5.84321e-94	Transcript_004469;Transcript_010111;Transcript_010369;Transcript_016203;Transcript_016431;Transcript_021018;Transcript_021643;Transcript_023042;Transcript_024497;Transcript_028320;Transcript_029297;Transcript_029746;Transcript_031102;Transcript_033383;Transcript_042217;Transcript_045319;Transcript_049149;Transcript_057971;Transcript_062135;Transcript_069455;Transcript_079322;Transcript_149814;Tra…
GO:0016491	F:oxidoreductase_activity	34	3.99774e-74	Transcript_004155;Transcript_006773;Transcript_009381;Transcript_013410;Transcript_015584;Transcript_018331;Transcript_019935;Transcript_030205;Transcript_032272;Transcript_033984;Transcript_034041;Transcript_044097;Transcript_045640;Transcript_047321;Transcript_053182;Transcript_057859;Transcript_083010;Transcript_109930;Transcript_131936;Transcript_153953;Transcript_155689;Transcript_158294;Tra…
GO:0003924	F:GTPase_activity	32	5.44101e-70	Transcript_002675;Transcript_004764;Transcript_004842;Transcript_004843;Transcript_008354;Transcript_010526;Transcript_012392;Transcript_016567;Transcript_016986;Transcript_017225;Transcript_030679;Transcript_041684;Transcript_043075;Transcript_043875;Transcript_044858;Transcript_045057;Transcript_046508;Transcript_103380;Transcript_147891;Transcript_150246;Transcript_168236;Transcript_172603;Tra…
GO:0031625	F:ubiquitin_protein_ligase_binding	31	2.02093e-116	Transcript_008597;Transcript_009970;Transcript_010355;Transcript_014759;Transcript_026258;Transcript_093212;Transcript_095793;Transcript_100502;Transcript_123520;Transcript_123857;Transcript_127606;Transcript_157999;Transcript_163320;Transcript_167277;Transcript_168520;Transcript_170391;Transcript_182614;Transcript_191180;Transcript_191679;Transcript_195263;Transcript_197004;Transcript_199469;Tra…
GO:0044822	F:poly(A)_RNA_binding	31	6.98348e-68	Transcript_003601;Transcript_003602;Transcript_012262;Transcript_016986;Transcript_022100;Transcript_026774;Transcript_029996;Transcript_043594;Transcript_043875;Transcript_051286;Transcript_058642;Transcript_095317;Transcript_104913;Transcript_125114;Transcript_135796;Transcript_149420;Transcript_150018;Transcript_153181;Transcript_157447;Transcript_159255;Transcript_175896;Transcript_200038;Tra…
GO:0000166	F:nucleotide_binding	29	2.16541e-125	Transcript_013172;Transcript_023301;Transcript_024178;Transcript_026515;Transcript_026524;Transcript_026764;Transcript_028833;Transcript_042437;Transcript_042932;Transcript_048932;Transcript_065762;Transcript_097610;Transcript_115897;Transcript_124610;Transcript_128010;Transcript_131597;Transcript_149420;Transcript_158530;Transcript_165598;Transcript_171195;Transcript_180390;Transcript_180857;Tra…
GO:0004842	F:ubiquitin-protein_transferase_activity	28	3.51242e-95	Transcript_008597;Transcript_014759;Transcript_014881;Transcript_025456;Transcript_029089;Transcript_034047;Transcript_041558;Transcript_090430;Transcript_100197;Transcript_112483;Transcript_122229;Transcript_123520;Transcript_123857;Transcript_189146;Transcript_203246;Transcript_209986;Transcript_212191;Transcript_215401;Transcript_222869;Transcript_223414;Transcript_224727;Transcript_228061;Tra…
GO:0016787	F:hydrolase_activity	27	3.78674e-76	Transcript_006370;Transcript_006390;Transcript_010828;Transcript_011264;Transcript_015667;Transcript_021881;Transcript_025189;Transcript_025855;Transcript_032723;Transcript_035390;Transcript_080059;Transcript_095911;Transcript_146959;Transcript_157859;Transcript_159017;Transcript_166263;Transcript_171325;Transcript_188434;Transcript_188712;Transcript_189382;Transcript_192363;Transcript_203659;Tra…
GO:0000287	F:magnesium_ion_binding_	27	2.90999e-64	Transcript_000852;Transcript_005986;Transcript_010526;Transcript_010836;Transcript_011114;Transcript_014528;Transcript_014600;Transcript_031663;Transcript_032229;Transcript_034054;Transcript_037155;Transcript_062774;Transcript_077756;Transcript_089776;Transcript_120546;Transcript_148826;Transcript_148905;Transcript_149348;Transcript_156988;Transcript_183290;Transcript_203310;Transcript_227776;Tra…
GO:0043565	F:sequence-specific_DNA_binding	26	3.41276e-83	Transcript_005135;Transcript_008176;Transcript_009760;Transcript_011939;Transcript_016473;Transcript_016601;Transcript_019684;Transcript_022100;Transcript_025821;Transcript_027814;Transcript_027836;Transcript_031619;Transcript_039589;Transcript_040270;Transcript_042062;Transcript_169635;Transcript_185145;Transcript_192644;Transcript_195313;Transcript_205677;Transcript_207585;Transcript_210615;Tra…
GO:0016887	F:ATPase_activity	26	2.03578e-45	Transcript_007304;Transcript_009001;Transcript_017225;Transcript_019055;Transcript_020362;Transcript_021257;Transcript_024415;Transcript_027194;Transcript_034709;Transcript_050497;Transcript_087041;Transcript_114532;Transcript_154820;Transcript_163901;Transcript_167806;Transcript_175416;Transcript_186722;Transcript_188668;Transcript_193027;Transcript_195078;Transcript_197170;Transcript_199471;Tra…
GO:0001653	F:peptide_receptor_activity	25	1.79811e-93	Transcript_009970;Transcript_010355;Transcript_026258;Transcript_093212;Transcript_095793;Transcript_100502;Transcript_127606;Transcript_157999;Transcript_163320;Transcript_167277;Transcript_168520;Transcript_170391;Transcript_182614;Transcript_191180;Transcript_191679;Transcript_195263;Transcript_197004;Transcript_199469;Transcript_203446;Transcript_222241;Transcript_223826;Transcript_230943;Tra…
GO:0004675	F:transmembrane_receptor_protein_serine/threonine_kinase_activity	25	3.65496e-91	Transcript_009970;Transcript_010355;Transcript_026258;Transcript_093212;Transcript_095793;Transcript_100502;Transcript_127606;Transcript_157999;Transcript_163320;Transcript_167277;Transcript_168520;Transcript_170391;Transcript_182614;Transcript_191180;Transcript_191679;Transcript_195263;Transcript_197004;Transcript_199469;Transcript_203446;Transcript_222241;Transcript_223826;Transcript_230943;Tra…
GO:0020037	F:heme_binding	25	1.39382e-86	Transcript_001865;Transcript_017917;Transcript_018511;Transcript_020455;Transcript_023674;Transcript_029457;Transcript_036083;Transcript_040997;Transcript_042298;Transcript_043681;Transcript_044496;Transcript_059959;Transcript_060152;Transcript_090971;Transcript_114216;Transcript_160352;Transcript_176865;Transcript_190763;Transcript_193233;Transcript_196627;Transcript_212035;Transcript_225775;Tra…
GO:0004672	F:protein_kinase_activity	24	2.72576e-73	Transcript_000361;Transcript_003555;Transcript_004977;Transcript_007427;Transcript_009556;Transcript_010355;Transcript_014265;Transcript_028197;Transcript_033017;Transcript_034660;Transcript_081569;Transcript_091769;Transcript_100502;Transcript_143441;Transcript_163769;Transcript_187639;Transcript_188104;Transcript_197004;Transcript_220376;Transcript_235878;Transcript_236384;Transcript_237366;Tra…
GO:0030246	F:carbohydrate_binding_	24	5.4377e-51	Transcript_006647;Transcript_010174;Transcript_010355;Transcript_029746;Transcript_031866;Transcript_043532;Transcript_045319;Transcript_127606;Transcript_149814;Transcript_152063;Transcript_155913;Transcript_166879;Transcript_170391;Transcript_201020;Transcript_201466;Transcript_217012;Transcript_223483;Transcript_229106;Transcript_231389;Transcript_233702;Transcript_233995;Transcript_235663;Tra…
GO:0005507	F:copper_ion_binding	24	9.2293e-39	Transcript_005630;Transcript_006390;Transcript_006675;Transcript_006886;Transcript_007347;Transcript_009053;Transcript_018514;Transcript_025995;Transcript_032272;Transcript_033984;Transcript_034831;Transcript_035581;Transcript_046112;Transcript_106270;Transcript_121426;Transcript_141694;Transcript_158955;Transcript_177859;Transcript_183278;Transcript_197557;Transcript_222613;Transcript_224193;Tra…
GO:0019843	F:rRNA_binding	20	6.28442e-46	Transcript_007649;Transcript_013664;Transcript_016218;Transcript_017394;Transcript_018528;Transcript_022570;Transcript_026269;Transcript_032203;Transcript_049278;Transcript_081223;Transcript_088864;Transcript_104913;Transcript_110572;Transcript_125114;Transcript_142689;Transcript_157447;Transcript_180586;Transcript_183535;Transcript_184806;Transcript_225057
GO:0042803	F:protein_homodimerization_activity	19	2.67581e-62	Transcript_021257;Transcript_025498;Transcript_034016;Transcript_042077;Transcript_043402;Transcript_120546;Transcript_152339;Transcript_153373;Transcript_166590;Transcript_185779;Transcript_194992;Transcript_194997;Transcript_209045;Transcript_221914;Transcript_229005;Transcript_229938;Transcript_238051;Transcript_239667;Transcript_242079
GO:0003743	F:translation_initiation_factor_activity	19	1.56764e-35	Transcript_009203;Transcript_012262;Transcript_016560;Transcript_030122;Transcript_031078;Transcript_031558;Transcript_041538;Transcript_042437;Transcript_043594;Transcript_136358;Transcript_148931;Transcript_150246;Transcript_154736;Transcript_215917;Transcript_224218;Transcript_224747;Transcript_234158;Transcript_235250;Transcript_243161
GO:0042802	F:identical_protein_binding	18	2.78781e-31	Transcript_000361;Transcript_006334;Transcript_015798;Transcript_026452;Transcript_027814;Transcript_034054;Transcript_034660;Transcript_042077;Transcript_101984;Transcript_142487;Transcript_162281;Transcript_199186;Transcript_200038;Transcript_221914;Transcript_227776;Transcript_229385;Transcript_234175;Transcript_242079
GO:0005215	F:transporter_activity	17	1.90408e-43	Transcript_006721;Transcript_009070;Transcript_015003;Transcript_019055;Transcript_024415;Transcript_026942;Transcript_043294;Transcript_106824;Transcript_156394;Transcript_169520;Transcript_191446;Transcript_193027;Transcript_195078;Transcript_197413;Transcript_200150;Transcript_203070;Transcript_241902
GO:0003676	F:nucleic_acid_binding	16	9.90398e-64	Transcript_013527;Transcript_013909;Transcript_016415;Transcript_032315;Transcript_049116;Transcript_066301;Transcript_074557;Transcript_084112;Transcript_155389;Transcript_158012;Transcript_173618;Transcript_197515;Transcript_206484;Transcript_224027;Transcript_224363;Transcript_242218
GO:0043531	F:ADP_binding_	16	8.66097e-45	Transcript_014870;Transcript_018718;Transcript_026681;Transcript_032150;Transcript_089943;Transcript_125015;Transcript_134246;Transcript_159716;Transcript_172479;Transcript_173427;Transcript_191296;Transcript_203157;Transcript_223380;Transcript_228363;Transcript_232040;Transcript_240392
GO:0050660	F:flavin_adenine_dinucleotide_binding	16	2.62652e-38	Transcript_006334;Transcript_020906;Transcript_024129;Transcript_026795;Transcript_028047;Transcript_042960;Transcript_047156;Transcript_121426;Transcript_133357;Transcript_188188;Transcript_201752;Transcript_204893;Transcript_224656;Transcript_232921;Transcript_235200;Transcript_237552
GO:0004252	F:serine-type_endopeptidase_activity	16	4.73208e-36	Transcript_047691;Transcript_092515;Transcript_153193;Transcript_157601;Transcript_158348;Transcript_158550;Transcript_166298;Transcript_172827;Transcript_172934;Transcript_181757;Transcript_182863;Transcript_188304;Transcript_195425;Transcript_197673;Transcript_205619;Transcript_207739
GO:0004386	F:helicase_activity	16	1.74829e-30	Transcript_001691;Transcript_014461;Transcript_023610;Transcript_029924;Transcript_036952;Transcript_043594;Transcript_093342;Transcript_139660;Transcript_154736;Transcript_165031;Transcript_206170;Transcript_210991;Transcript_222148;Transcript_224218;Transcript_226076;Transcript_239497
GO:0008289	F:lipid_binding_	15	2.36092e-37	Transcript_001031;Transcript_016485;Transcript_026942;Transcript_029492;Transcript_029712;Transcript_053565;Transcript_087883;Transcript_101433;Transcript_150018;Transcript_194928;Transcript_197413;Transcript_203070;Transcript_217546;Transcript_229632;Transcript_233419
GO:0008565	F:protein_transporter_activity	15	1.73094e-24	Transcript_014649;Transcript_016204;Transcript_018757;Transcript_018940;Transcript_027502;Transcript_033908;Transcript_043468;Transcript_108981;Transcript_156026;Transcript_187119;Transcript_206246;Transcript_207612;Transcript_235418;Transcript_241108;Transcript_243146
GO:0004722	F:protein_serine/threonine_phosphatase_activity	14	2.33867e-38	Transcript_011923;Transcript_013342;Transcript_013781;Transcript_016017;Transcript_019538;Transcript_022802;Transcript_024005;Transcript_031850;Transcript_035318;Transcript_059763;Transcript_087103;Transcript_204604;Transcript_225177;Transcript_237889
GO:0008168	F:methyltransferase_activity	14	3.2422e-28	Transcript_009517;Transcript_013899;Transcript_016005;Transcript_024085;Transcript_036091;Transcript_095937;Transcript_149653;Transcript_187753;Transcript_200038;Transcript_213337;Transcript_219802;Transcript_224265;Transcript_231963;Transcript_232035
GO:0004222	F:metalloendopeptidase_activity	13	2.56454e-15	Transcript_022952;Transcript_026424;Transcript_034221;Transcript_039672;Transcript_093665;Transcript_122035;Transcript_184234;Transcript_187190;Transcript_193422;Transcript_198760;Transcript_222677;Transcript_225384;Transcript_238793
GO:0009055	F:electron_carrier_activity	12	1.01135e-39	Transcript_009053;Transcript_009517;Transcript_012826;Transcript_017917;Transcript_019529;Transcript_030330;Transcript_035963;Transcript_038425;Transcript_230068;Transcript_237552;Transcript_238422;Transcript_239152
GO:0030170	F:pyridoxal_phosphate_binding	12	1.51383e-37	Transcript_010828;Transcript_034831;Transcript_041676;Transcript_042372;Transcript_055405;Transcript_077725;Transcript_135572;Transcript_157858;Transcript_191395;Transcript_209738;Transcript_243351;Transcript_243550
GO:0016705	F:oxidoreductase_activity,_acting_on_paired_donors,_with_incorporation_or_reduction_of_molecular_oxygen	12	1.18551e-30	Transcript_020455;Transcript_029457;Transcript_042298;Transcript_043681;Transcript_044496;Transcript_090971;Transcript_160352;Transcript_171704;Transcript_212035;Transcript_225775;Transcript_226764;Transcript_226799
GO:0051539	F:4_iron,_4_sulfur_cluster_binding	12	4.87624e-30	Transcript_004880;Transcript_015584;Transcript_018331;Transcript_021247;Transcript_023212;Transcript_049632;Transcript_071931;Transcript_083010;Transcript_090030;Transcript_090284;Transcript_143674;Transcript_238422
GO:0003729	F:mRNA_binding	12	4.96095e-18	Transcript_006236;Transcript_006795;Transcript_016483;Transcript_023212;Transcript_025855;Transcript_043594;Transcript_051286;Transcript_079374;Transcript_110572;Transcript_185145;Transcript_195453;Transcript_223074
GO:0005516	F:calmodulin_binding	11	6.547e-35	Transcript_008176;Transcript_010355;Transcript_103275;Transcript_152063;Transcript_199370;Transcript_201137;Transcript_202384;Transcript_220376;Transcript_233702;Transcript_235878;Transcript_241087
GO:0016301	F:kinase_activity	11	5.60261e-34	Transcript_014600;Transcript_042217;Transcript_100502;Transcript_107140;Transcript_145272;Transcript_145917;Transcript_172794;Transcript_187797;Transcript_192556;Transcript_221915;Transcript_244669
GO:0004497	F:monooxygenase_activity	11	4.94999e-33	Transcript_020455;Transcript_029457;Transcript_042298;Transcript_043681;Transcript_044496;Transcript_090971;Transcript_160352;Transcript_212035;Transcript_225775;Transcript_226764;Transcript_226799
GO:0015293	F:symporter_activity	11	7.37963e-28	Transcript_004778;Transcript_008298;Transcript_041292;Transcript_085884;Transcript_097145;Transcript_097999;Transcript_139829;Transcript_193304;Transcript_229566;Transcript_231533;Transcript_233903
GO:0042626	F:ATPase_activity,_coupled_to_transmembrane_movement_of_substances	11	4.64434e-13	Transcript_015003;Transcript_021257;Transcript_029113;Transcript_031605;Transcript_088879;Transcript_099781;Transcript_120875;Transcript_199082;Transcript_200150;Transcript_219033;Transcript_222312
GO:0016757	F:transferase_activity,_transferring_glycosyl_groups_	10	4.86819e-40	Transcript_004851;Transcript_021186;Transcript_035627;Transcript_046845;Transcript_051590;Transcript_076237;Transcript_087796;Transcript_170115;Transcript_232252;Transcript_236296
GO:0008137	F:NADH_dehydrogenase_(ubiquinone)_activity	10	4.14571e-18	Transcript_004880;Transcript_016315;Transcript_023779;Transcript_152859;Transcript_198631;Transcript_204893;Transcript_219022;Transcript_235200;Transcript_236234;Transcript_239152
GO:0003777	F:microtubule_motor_activity	10	6.41406e-17	Transcript_001256;Transcript_009001;Transcript_016377;Transcript_050497;Transcript_154820;Transcript_163901;Transcript_175416;Transcript_183925;Transcript_199471;Transcript_227602
GO:0051287	F:NAD_binding	9	1.00729e-43	Transcript_009494;Transcript_016780;Transcript_021635;Transcript_035046;Transcript_149539;Transcript_156988;Transcript_202366;Transcript_236323;Transcript_241886
GO:0004721	F:phosphoprotein_phosphatase_activity	9	4.35764e-23	Transcript_015425;Transcript_015882;Transcript_024005;Transcript_025206;Transcript_027518;Transcript_131765;Transcript_139813;Transcript_154200;Transcript_209422
GO:0004185	F:serine-type_carboxypeptidase_activity	9	1.11709e-20	Transcript_000791;Transcript_004466;Transcript_010073;Transcript_029823;Transcript_045093;Transcript_118753;Transcript_157341;Transcript_225236;Transcript_230284
GO:0005200	F:structural_constituent_of_cytoskeleton	9	1.61921e-15	Transcript_004764;Transcript_004842;Transcript_030679;Transcript_043075;Transcript_103380;Transcript_168236;Transcript_179927;Transcript_197714;Transcript_238919
GO:0016597	F:amino_acid_binding_	9	4.45896e-13	Transcript_035046;Transcript_037064;Transcript_045644;Transcript_120726;Transcript_157295;Transcript_190091;Transcript_197209;Transcript_222192;Transcript_242732
GO:0004712	F:protein_serine/threonine/tyrosine_kinase_activity	9	1.3659e-05	Transcript_007427;Transcript_014265;Transcript_015977;Transcript_019961;Transcript_037105;Transcript_053567;Transcript_081569;Transcript_145272;Transcript_159854
GO:0004190	F:aspartic-type_endopeptidase_activity_	8	2.33875e-55	Transcript_000434;Transcript_012060;Transcript_037133;Transcript_049116;Transcript_084112;Transcript_130853;Transcript_197515;Transcript_222943
GO:0004519	F:endonuclease_activity	8	6.30236e-30	Transcript_049116;Transcript_084112;Transcript_130853;Transcript_158012;Transcript_197515;Transcript_202654;Transcript_227802;Transcript_240360
GO:0050661	F:NADP_binding	8	1.32939e-27	Transcript_010592;Transcript_021285;Transcript_026795;Transcript_045644;Transcript_188188;Transcript_202366;Transcript_204443;Transcript_232471
GO:0061630	F:ubiquitin_protein_ligase_activity	8	2.4985e-27	Transcript_008597;Transcript_014759;Transcript_083204;Transcript_123520;Transcript_123857;Transcript_209986;Transcript_215401;Transcript_243787
GO:0005096	F:GTPase_activator_activity_	8	2.82435e-22	Transcript_012966;Transcript_015116;Transcript_028795;Transcript_037026;Transcript_043014;Transcript_044539;Transcript_084010;Transcript_204236
GO:0003899	F:DNA-directed_RNA_polymerase_activity	8	1.07465e-19	Transcript_012987;Transcript_023999;Transcript_028183;Transcript_045479;Transcript_177859;Transcript_180390;Transcript_235951;Transcript_237292
GO:0016788	F:hydrolase_activity,_acting_on_ester_bonds	8	1.61609e-18	Transcript_024035;Transcript_070780;Transcript_176855;Transcript_187315;Transcript_195839;Transcript_198345;Transcript_218059;Transcript_226191
GO:0016758	F:transferase_activity,_transferring_hexosyl_groups	8	1.02262e-15	Transcript_008882;Transcript_010048;Transcript_017600;Transcript_021872;Transcript_044017;Transcript_227191;Transcript_230404;Transcript_232163
GO:0004004	F:ATP-dependent_RNA_helicase_activity	8	5.68868e-15	Transcript_012262;Transcript_020362;Transcript_043594;Transcript_167220;Transcript_175896;Transcript_191819;Transcript_224847;Transcript_232525
GO:0008017	F:microtubule_binding	8	5.80256e-14	Transcript_016436;Transcript_050497;Transcript_059959;Transcript_079374;Transcript_139813;Transcript_154200;Transcript_154820;Transcript_163901
GO:0003697	F:single-stranded_DNA_binding	8	1.14314e-13	Transcript_022100;Transcript_022196;Transcript_031480;Transcript_047736;Transcript_071405;Transcript_185145;Transcript_188668;Transcript_215297
GO:0016740	F:transferase_activity	8	2.24687e-12	Transcript_024375;Transcript_042206;Transcript_077756;Transcript_095317;Transcript_194914;Transcript_239941;Transcript_242855;Transcript_243351
GO:0016706	F:oxidoreductase_activity,_acting_on_paired_donors,_with_incorporation_or_reduction_of_molecular_oxygen,_2-oxoglutarate_as_one_donor,_and_incorporation_of_one_atom_each_of_oxygen_into_both_donors	8	3.12927e-10	Transcript_024085;Transcript_024375;Transcript_095937;Transcript_149653;Transcript_165068;Transcript_198535;Transcript_202132;Transcript_232291
GO:0030145	F:manganese_ion_binding	8	1.01787e-08	Transcript_003701;Transcript_044748;Transcript_048008;Transcript_069789;Transcript_150940;Transcript_151165;Transcript_230958;Transcript_240360
GO:0003684	F:damaged_DNA_binding	8	1.30972e-07	Transcript_015798;Transcript_020776;Transcript_021735;Transcript_142487;Transcript_165796;Transcript_172646;Transcript_197824;Transcript_228895
GO:0003964	F:RNA-directed_DNA_polymerase_activity	7	5.07964e-27	Transcript_016415;Transcript_049116;Transcript_084112;Transcript_130853;Transcript_158012;Transcript_197515;Transcript_222943
GO:0050662	F:coenzyme_binding	7	7.29608e-27	Transcript_025190;Transcript_025940;Transcript_131936;Transcript_144405;Transcript_153953;Transcript_233175;Transcript_233387
GO:0052689	F:carboxylic_ester_hydrolase_activity	7	5.13465e-25	Transcript_044198;Transcript_077461;Transcript_158885;Transcript_166474;Transcript_192672;Transcript_223096;Transcript_223799
GO:0015035	F:protein_disulfide_oxidoreductase_activity	7	1.74396e-23	Transcript_014604;Transcript_019529;Transcript_035963;Transcript_037644;Transcript_156926;Transcript_223304;Transcript_230068
GO:0008234	F:cysteine-type_peptidase_activity	7	3.40757e-21	Transcript_088907;Transcript_096377;Transcript_153902;Transcript_153950;Transcript_194185;Transcript_201430;Transcript_227277
GO:0003746	F:translation_elongation_factor_activity	7	5.3466e-18	Transcript_004843;Transcript_016986;Transcript_028857;Transcript_041538;Transcript_041684;Transcript_190715;Transcript_227097
GO:0005198	F:structural_molecule_activity	7	8.11151e-17	Transcript_020236;Transcript_031747;Transcript_043263;Transcript_044971;Transcript_096109;Transcript_149903;Transcript_226688
GO:0004197	F:cysteine-type_endopeptidase_activity	7	6.22778e-16	Transcript_018082;Transcript_122153;Transcript_149903;Transcript_156977;Transcript_175291;Transcript_199141;Transcript_201430
GO:0046961	F:proton-transporting_ATPase_activity,_rotational_mechanism	7	5.67393e-13	Transcript_004585;Transcript_023555;Transcript_026611;Transcript_043185;Transcript_205374;Transcript_235352;Transcript_239369
GO:0047262	F:polygalacturonate_4-alpha-galacturonosyltransferase_activity	7	5.67393e-13	Transcript_012883;Transcript_058380;Transcript_074927;Transcript_151634;Transcript_176239;Transcript_218648;Transcript_236296
GO:0016168	F:chlorophyll_binding	7	2.22394e-11	Transcript_005179;Transcript_018416;Transcript_038206;Transcript_145533;Transcript_152342;Transcript_155928;Transcript_201460
GO:0008236	F:serine-type_peptidase_activity	7	3.12525e-11	Transcript_011737;Transcript_023068;Transcript_025674;Transcript_042077;Transcript_105842;Transcript_172193;Transcript_188304
GO:0004175	F:endopeptidase_activity	7	4.39464e-11	Transcript_002519;Transcript_018525;Transcript_078776;Transcript_131551;Transcript_166298;Transcript_172193;Transcript_227452
GO:0048038	F:quinone_binding	7	3.04872e-10	Transcript_007347;Transcript_106270;Transcript_158955;Transcript_177859;Transcript_197557;Transcript_222613;Transcript_238422
GO:0004650	F:polygalacturonase_activity	7	4.25657e-10	Transcript_016328;Transcript_025932;Transcript_077036;Transcript_105933;Transcript_187941;Transcript_222225;Transcript_232696
GO:0022891	F:substrate-specific_transmembrane_transporter_activity	7	5.94682e-10	Transcript_004778;Transcript_097999;Transcript_158070;Transcript_211117;Transcript_230685;Transcript_233903;Transcript_236807
GO:0005388	F:calcium-transporting_ATPase_activity	7	1.16292e-09	Transcript_016203;Transcript_018271;Transcript_026322;Transcript_031587;Transcript_054446;Transcript_059699;Transcript_093127
GO:0046933	F:proton-transporting_ATP_synthase_activity,_rotational_mechanism	7	2.12878e-09	Transcript_023555;Transcript_026611;Transcript_040111;Transcript_043185;Transcript_045337;Transcript_201255;Transcript_205374
GO:0050897	F:cobalt_ion_binding	7	4.35047e-06	Transcript_002215;Transcript_010828;Transcript_023779;Transcript_042883;Transcript_121426;Transcript_141694;Transcript_211261
GO:0015095	F:magnesium_ion_transmembrane_transporter_activity	7	5.96301e-06	Transcript_035629;Transcript_081763;Transcript_095467;Transcript_170559;Transcript_198098;Transcript_233014;Transcript_234293
GO:0051537	F:2_iron,_2_sulfur_cluster_binding	6	2.1204e-20	Transcript_009517;Transcript_019529;Transcript_030330;Transcript_032252;Transcript_035963;Transcript_171704
GO:0005484	F:SNAP_receptor_activity	6	7.69334e-16	Transcript_023676;Transcript_025370;Transcript_039015;Transcript_041422;Transcript_071779;Transcript_161644
GO:0004298	F:threonine-type_endopeptidase_activity	6	1.09947e-15	Transcript_002519;Transcript_008163;Transcript_018525;Transcript_131551;Transcript_213671;Transcript_227452
GO:0004553	F:hydrolase_activity,_hydrolyzing_O-glycosyl_compounds	6	1.75088e-13	Transcript_025565;Transcript_152390;Transcript_217012;Transcript_234475;Transcript_238561;Transcript_243850
GO:0031418	F:L-ascorbic_acid_binding_	6	4.00398e-11	Transcript_160512;Transcript_181616;Transcript_215624;Transcript_220342;Transcript_232480;Transcript_235388
GO:0008094	F:DNA-dependent_ATPase_activity	6	2.55673e-06	Transcript_013970;Transcript_022196;Transcript_139660;Transcript_172646;Transcript_215297;Transcript_228895
GO:0051015	F:actin_filament_binding	6	6.58535e-06	Transcript_020276;Transcript_154200;Transcript_157618;Transcript_192590;Transcript_217583;Transcript_226013
GO:0004872	F:receptor_activity	6	4.40608e-05	Transcript_020405;Transcript_030348;Transcript_152339;Transcript_196770;Transcript_226660;Transcript_229938
GO:0004575	F:sucrose_alpha-glucosidase_activity	6	0.000262811	Transcript_017853;Transcript_023370;Transcript_064798;Transcript_109577;Transcript_165034;Transcript_199971
GO:0004521	F:endoribonuclease_activity	6	0.00459016	Transcript_022100;Transcript_023948;Transcript_034582;Transcript_048008;Transcript_069789;Transcript_185145
GO:0004601	F:peroxidase_activity	5	5.7079e-22	Transcript_001865;Transcript_029297;Transcript_060152;Transcript_190763;Transcript_196627
GO:0008233	F:peptidase_activity	5	2.40993e-21	Transcript_018082;Transcript_070004;Transcript_156977;Transcript_158012;Transcript_222943
GO:0008237	F:metallopeptidase_activity	5	6.86988e-17	Transcript_018744;Transcript_030606;Transcript_042380;Transcript_079927;Transcript_154408
GO:0000149	F:SNARE_binding	5	1.8573e-14	Transcript_039015;Transcript_071779;Transcript_161644;Transcript_193394;Transcript_234643
GO:0004871	F:signal_transducer_activity	5	5.39735e-14	Transcript_012392;Transcript_018519;Transcript_139813;Transcript_159282;Transcript_202863
GO:0015078	F:hydrogen_ion_transmembrane_transporter_activity	5	3.33661e-12	Transcript_006390;Transcript_009757;Transcript_080670;Transcript_168752;Transcript_230521
GO:0004129	F:cytochrome-c_oxidase_activity	5	4.94517e-11	Transcript_005630;Transcript_036083;Transcript_093530;Transcript_203116;Transcript_224588
GO:0018024	F:histone-lysine_N-methyltransferase_activity	5	3.97165e-10	Transcript_009537;Transcript_044742;Transcript_176103;Transcript_224710;Transcript_231829
GO:0004693	F:cyclin-dependent_protein_serine/threonine_kinase_activity	5	5.61344e-09	Transcript_000724;Transcript_004963;Transcript_021966;Transcript_028959;Transcript_176223
GO:0016762	F:xyloglucan:xyloglucosyl_transferase_activity	5	1.11342e-08	Transcript_025565;Transcript_152390;Transcript_234475;Transcript_238561;Transcript_243850
GO:0008762	F:UDP-N-acetylmuramate_dehydrogenase_activity	5	2.21268e-08	Transcript_024129;Transcript_042960;Transcript_047156;Transcript_133357;Transcript_201752
GO:0000155	F:phosphorelay_sensor_kinase_activity	5	3.99881e-08	Transcript_020405;Transcript_109012;Transcript_196770;Transcript_226660;Transcript_237130
GO:0008601	F:protein_phosphatase_type_2A_regulator_activity	5	1.0901e-07	Transcript_018791;Transcript_023274;Transcript_033378;Transcript_093206;Transcript_128635
GO:0016298	F:lipase_activity	5	5.48264e-07	Transcript_017874;Transcript_041988;Transcript_042206;Transcript_221871;Transcript_233880
GO:0004709	F:MAP_kinase_kinase_kinase_activity	5	1.8707e-05	Transcript_012506;Transcript_022653;Transcript_145272;Transcript_154573;Transcript_169370
GO:0008061	F:chitin_binding	5	1.8707e-05	Transcript_077638;Transcript_096837;Transcript_149601;Transcript_208164;Transcript_217012
GO:0003725	F:double-stranded_RNA_binding	5	6.70013e-05	Transcript_012262;Transcript_043594;Transcript_052769;Transcript_125733;Transcript_241334
GO:0000156	F:phosphorelay_response_regulator_activity	5	0.000225177	Transcript_020405;Transcript_024208;Transcript_117469;Transcript_196770;Transcript_226660
GO:0030955	F:potassium_ion_binding	5	0.000417327	Transcript_062774;Transcript_089776;Transcript_148826;Transcript_148905;Transcript_203310
GO:0004743	F:pyruvate_kinase_activity	5	0.00056808	Transcript_062774;Transcript_089776;Transcript_148826;Transcript_148905;Transcript_203310
GO:0033926	F:glycopeptide_alpha-N-acetylgalactosaminidase_activity	5	0.0241676	Transcript_017853;Transcript_023370;Transcript_109577;Transcript_165034;Transcript_199971
GO:0004478	F:methionine_adenosyltransferase_activity	5	0.0241676	Transcript_006978;Transcript_030648;Transcript_042822;Transcript_159028;Transcript_222314
GO:0044212	F:transcription_regulatory_region_DNA_binding	4	4.73952e-27	Transcript_044529;Transcript_183955;Transcript_184165;Transcript_222544
GO:0015297	F:antiporter_activity	4	2.21021e-21	Transcript_029830;Transcript_034534;Transcript_042104;Transcript_063605
GO:0003682	F:chromatin_binding	4	9.6614e-21	Transcript_015798;Transcript_043402;Transcript_142487;Transcript_194992
GO:0004177	F:aminopeptidase_activity	4	3.30064e-15	Transcript_030606;Transcript_044748;Transcript_079927;Transcript_181757
GO:0043621	F:protein_self-association	4	1.38099e-14	Transcript_018841;Transcript_125733;Transcript_155268;Transcript_243378
GO:0005543	F:phospholipid_binding	4	4.48628e-13	Transcript_001032;Transcript_015578;Transcript_020324;Transcript_028795
GO:0003774	F:motor_activity	4	1.66096e-10	Transcript_010380;Transcript_017736;Transcript_042212;Transcript_191165
GO:0004683	F:calmodulin-dependent_protein_kinase_activity	4	6.8006e-10	Transcript_201137;Transcript_202384;Transcript_220376;Transcript_235878
GO:0042302	F:structural_constituent_of_cuticle	4	8.94546e-10	Transcript_023542;Transcript_165127;Transcript_192002;Transcript_199658
GO:0042393	F:histone_binding	4	1.77661e-09	Transcript_183851;Transcript_199156;Transcript_229005;Transcript_240717
GO:0003713	F:transcription_coactivator_activity	4	3.53617e-09	Transcript_040271;Transcript_108837;Transcript_187506;Transcript_204709
GO:0009931	F:calcium-dependent_protein_serine/threonine_kinase_activity	4	3.53617e-09	Transcript_201137;Transcript_202384;Transcript_220376;Transcript_235878
GO:0003779	F:actin_binding_	4	3.9982e-08	Transcript_081381;Transcript_154200;Transcript_217583;Transcript_225114
GO:0008353	F:RNA_polymerase_II_carboxy-terminal_domain_kinase_activity	4	7.35476e-08	Transcript_000724;Transcript_004963;Transcript_021966;Transcript_028959
GO:0009881	F:photoreceptor_activity	4	1.03117e-07	Transcript_043402;Transcript_109012;Transcript_194992;Transcript_237130
GO:0016746	F:transferase_activity,_transferring_acyl_groups	4	1.03117e-07	Transcript_018802;Transcript_034176;Transcript_098438;Transcript_191437
GO:0016829	F:lyase_activity	4	7.91045e-07	Transcript_018331;Transcript_034054;Transcript_071931;Transcript_090030
GO:0016671	F:oxidoreductase_activity,_acting_on_a_sulfur_group_of_donors,_disulfide_as_acceptor	4	1.11251e-06	Transcript_006334;Transcript_014604;Transcript_037644;Transcript_156926
GO:0016747	F:transferase_activity,_transferring_acyl_groups_other_than_amino-acyl_groups	4	2.04912e-06	Transcript_005449;Transcript_043237;Transcript_155818;Transcript_160954
GO:0008408	F:3'-5'_exonuclease_activity	4	2.85235e-06	Transcript_016657;Transcript_170329;Transcript_224027;Transcript_238693
GO:0051213	F:dioxygenase_activity	4	7.7117e-06	Transcript_006542;Transcript_025442;Transcript_074557;Transcript_226393
GO:0004527	F:exonuclease_activity	4	1.07507e-05	Transcript_008432;Transcript_031480;Transcript_032315;Transcript_240360
GO:0070402	F:NADPH_binding	4	2.917e-05	Transcript_017329;Transcript_040273;Transcript_162588;Transcript_242079
GO:0030976	F:thiamine_pyrophosphate_binding	4	7.32273e-05	Transcript_000852;Transcript_034054;Transcript_037155;Transcript_203816
GO:0003714	F:transcription_corepressor_activity	4	0.000139587	Transcript_006795;Transcript_063895;Transcript_099209;Transcript_150574
GO:0003843	F:1,3-beta-D-glucan_synthase_activity	4	0.000139587	Transcript_061772;Transcript_149561;Transcript_155810;Transcript_194193
GO:0004568	F:chitinase_activity	4	0.000266179	Transcript_077638;Transcript_096837;Transcript_149601;Transcript_208164
GO:0008889	F:glycerophosphodiester_phosphodiesterase_activity	4	0.00230414	Transcript_005986;Transcript_018502;Transcript_059666;Transcript_149716
GO:0009927	F:histidine_phosphotransfer_kinase_activity	4	0.00582867	Transcript_020405;Transcript_196770;Transcript_226660;Transcript_228794
GO:0016308	F:1-phosphatidylinositol-4-phosphate_5-kinase_activity	4	0.0183376	Transcript_042004;Transcript_157618;Transcript_185415;Transcript_187099
GO:0004430	F:1-phosphatidylinositol_4-kinase_activity_	4	0.0245891	Transcript_012398;Transcript_030476;Transcript_068167;Transcript_192590
GO:0080072	F:spermidine:sinapoyl_CoA_N-acyltransferase_activity	4	0.209614	Transcript_057799;Transcript_097155;Transcript_197038;Transcript_220227
GO:0022857	F:transmembrane_transporter_activity	3	6.37973e-26	Transcript_017321;Transcript_046092;Transcript_059958
GO:0003887	F:DNA-directed_DNA_polymerase_activity	3	9.63909e-20	Transcript_130853;Transcript_210615;Transcript_222943
GO:0042973	F:glucan_endo-1,3-beta-D-glucosidase_activity	3	3.87455e-19	Transcript_008678;Transcript_176122;Transcript_231204
GO:0008422	F:beta-glucosidase_activity	3	6.40711e-17	Transcript_189113;Transcript_233010;Transcript_235608
GO:0010181	F:FMN_binding	3	2.51968e-16	Transcript_018331;Transcript_028047;Transcript_052466
GO:0004857	F:enzyme_inhibitor_activity	3	4.55007e-15	Transcript_003497;Transcript_014604;Transcript_069670
GO:0043022	F:ribosome_binding	3	1.95777e-14	Transcript_028857;Transcript_041538;Transcript_157447
GO:0016760	F:cellulose_synthase_(UDP-forming)_activity	3	4.07304e-14	Transcript_148491;Transcript_155240;Transcript_223233
GO:0004364	F:glutathione_transferase_activity	3	6.54417e-13	Transcript_175483;Transcript_192715;Transcript_209211
GO:0019901	F:protein_kinase_binding	3	2.77359e-12	Transcript_024005;Transcript_160066;Transcript_207184
GO:0003824	F:catalytic_activity_	3	1.53479e-11	Transcript_107044;Transcript_153867;Transcript_197407
GO:0016709	F:oxidoreductase_activity,_acting_on_paired_donors,_with_incorporation_or_reduction_of_molecular_oxygen,_NAD(P)H_as_one_donor,_and_incorporation_of_one_atom_of_oxygen	3	1.02326e-09	Transcript_099845;Transcript_114216;Transcript_239963
GO:0005085	F:guanyl-nucleotide_exchange_factor_activity	3	1.10695e-09	Transcript_027575;Transcript_043402;Transcript_194992
GO:0019706	F:protein-cysteine_S-palmitoyltransferase_activity	3	2.91579e-09	Transcript_165277;Transcript_196119;Transcript_224039
GO:0004713	F:protein_tyrosine_kinase_activity	3	2.3994e-08	Transcript_012807;Transcript_223474;Transcript_236330
GO:0015079	F:potassium_ion_transmembrane_transporter_activity	3	9.1646e-08	Transcript_029745;Transcript_040274;Transcript_189378
GO:0004003	F:ATP-dependent_DNA_helicase_activity	3	9.86852e-08	Transcript_023060;Transcript_071405;Transcript_090284
GO:0045735	F:nutrient_reservoir_activity	3	3.62929e-07	Transcript_003701;Transcript_030024;Transcript_151165
GO:0005315	F:inorganic_phosphate_transmembrane_transporter_activity	3	1.0236e-06	Transcript_085884;Transcript_231533;Transcript_235192
GO:0030515	F:snoRNA_binding	3	1.44737e-06	Transcript_003601;Transcript_086503;Transcript_129702
GO:0004806	F:triglyceride_lipase_activity_	3	2.04732e-06	Transcript_055067;Transcript_108555;Transcript_226282
GO:0004523	F:RNA-DNA_hybrid_ribonuclease_activity	3	2.04732e-06	Transcript_008432;Transcript_016415;Transcript_222943
GO:0003712	F:transcription_cofactor_activity	3	4.10015e-06	Transcript_002021;Transcript_054599;Transcript_098438
GO:0004427	F:inorganic_diphosphatase_activity_	3	4.10015e-06	Transcript_172102;Transcript_223426;Transcript_230419
GO:0005102	F:receptor_binding	3	5.40643e-06	Transcript_034054;Transcript_059959;Transcript_120546
GO:0010329	F:auxin_efflux_transmembrane_transporter_activity	3	5.40643e-06	Transcript_031605;Transcript_080441;Transcript_222312
GO:0030570	F:pectate_lyase_activity	3	5.80462e-06	Transcript_042628;Transcript_067062;Transcript_242246
GO:0016853	F:isomerase_activity	3	5.80462e-06	Transcript_020313;Transcript_201020;Transcript_233175
GO:0052716	F:hydroquinone:oxygen_oxidoreductase_activity	3	1.06074e-05	Transcript_018514;Transcript_035581;Transcript_235120
GO:0080130	F:L-phenylalanine:2-oxoglutarate_aminotransferase_activity	3	5.75163e-05	Transcript_034831;Transcript_135572;Transcript_157858
GO:0004622	F:lysophospholipase_activity	3	5.75163e-05	Transcript_011264;Transcript_035390;Transcript_157859
GO:0016866	F:intramolecular_transferase_activity	3	8.07056e-05	Transcript_005015;Transcript_014494;Transcript_015198
GO:0004784	F:superoxide_dismutase_activity	3	0.000158924	Transcript_044737;Transcript_065625;Transcript_067992
GO:0003968	F:RNA-directed_RNA_polymerase_activity	3	0.00020777	Transcript_149903;Transcript_165031;Transcript_199141
GO:0001104	F:RNA_polymerase_II_transcription_cofactor_activity	3	0.00020777	Transcript_019060;Transcript_093644;Transcript_227996
GO:0035064	F:methylated_histone_binding	3	0.00020777	Transcript_082825;Transcript_139660;Transcript_184165
GO:0090430	F:caffeoyl-CoA:_alcohol_caffeoyl_transferase_activity	3	0.000400444	Transcript_011264;Transcript_035390;Transcript_157859
GO:0003846	F:2-acylglycerol_O-acyltransferase_activity	3	0.000400444	Transcript_011264;Transcript_035390;Transcript_157859
GO:0004616	F:phosphogluconate_dehydrogenase_(decarboxylating)_activity	3	0.00055599	Transcript_021635;Transcript_149539;Transcript_232471
GO:0008970	F:phosphatidylcholine_1-acylhydrolase_activity	3	0.000771926	Transcript_055067;Transcript_071911;Transcript_108555
GO:0004656	F:procollagen-proline_4-dioxygenase_activity	3	0.000771926	Transcript_160512;Transcript_181616;Transcript_235388
GO:0004559	F:alpha-mannosidase_activity	3	0.00148716	Transcript_004469;Transcript_010111;Transcript_235663
GO:0003724	F:RNA_helicase_activity	3	0.00148716	Transcript_025598;Transcript_044789;Transcript_232525
GO:0008324	F:cation_transmembrane_transporter_activity	3	0.00206309	Transcript_012407;Transcript_127987;Transcript_225748
GO:0004316	F:3-oxoacyl-acyl-carrier-protein_reductase_(NADPH)_activity	3	0.00271515	Transcript_009494;Transcript_202366;Transcript_242079
GO:0008026	F:ATP-dependent_helicase_activity	3	0.00271515	Transcript_066301;Transcript_155389;Transcript_173618
GO:0048037	F:cofactor_binding	3	0.0028604	Transcript_014114;Transcript_034054;Transcript_233806
GO:0004176	F:ATP-dependent_peptidase_activity	3	0.0028604	Transcript_026424;Transcript_158550;Transcript_222677
GO:0004069	F:L-aspartate:2-oxoglutarate_aminotransferase_activity	3	0.0028604	Transcript_034831;Transcript_135572;Transcript_157858
GO:0000285	F:1-phosphatidylinositol-3-phosphate_5-kinase_activity	3	0.00699613	Transcript_088132;Transcript_222019;Transcript_234135
GO:0030983	F:mismatched_DNA_binding	3	0.0095806	Transcript_172646;Transcript_188668;Transcript_228895
GO:0008047	F:enzyme_activator_activity	3	0.0131077	Transcript_006334;Transcript_014604;Transcript_037644
GO:0004180	F:carboxypeptidase_activity	3	0.0131077	Transcript_023068;Transcript_025674;Transcript_042380
GO:0045486	F:naringenin_3-dioxygenase_activity	3	0.0131077	Transcript_215624;Transcript_220342;Transcript_232480
GO:0070300	F:phosphatidic_acid_binding	3	0.0179115	Transcript_025498;Transcript_153373;Transcript_192590
GO:0004526	F:ribonuclease_P_activity	3	0.0179115	Transcript_041560;Transcript_125733;Transcript_205336
GO:0008878	F:glucose-1-phosphate_adenylyltransferase_activity	3	0.0179115	Transcript_008643;Transcript_040039;Transcript_041688
GO:0050734	F:hydroxycinnamoyltransferase_activity_	3	0.0235345	Transcript_057799;Transcript_197038;Transcript_220227
GO:0008131	F:primary_amine_oxidase_activity	3	0.0244375	Transcript_007347;Transcript_158955;Transcript_222613
GO:0005347	F:ATP_transmembrane_transporter_activity	3	0.0317618	Transcript_017733;Transcript_029830;Transcript_206711
GO:0003849	F:3-deoxy-7-phosphoheptulonate_synthase_activity	3	0.0428083	Transcript_042248;Transcript_090733;Transcript_109203
GO:0000339	F:RNA_cap_binding	3	0.0428083	Transcript_042932;Transcript_043594;Transcript_191361
GO:0052594	F:aminoacetone:oxygen_oxidoreductase(deaminating)_activity	3	0.077317	Transcript_007347;Transcript_158955;Transcript_222613
GO:0052596	F:phenethylamine:oxygen_oxidoreductase_(deaminating)_activity	3	0.077317	Transcript_007347;Transcript_158955;Transcript_222613
GO:0052593	F:tryptamine:oxygen_oxidoreductase_(deaminating)_activity	3	0.077317	Transcript_007347;Transcript_158955;Transcript_222613
GO:0052595	F:aliphatic-amine_oxidase_activity_	3	0.077317	Transcript_007347;Transcript_158955;Transcript_222613
GO:0005471	F:ATP:ADP_antiporter_activity	3	0.103488	Transcript_007414;Transcript_045165;Transcript_233863
GO:0016682	F:oxidoreductase_activity,_acting_on_diphenols_and_related_substances_as_donors,_oxygen_as_acceptor	3	0.103488	Transcript_165068;Transcript_202132;Transcript_232291
GO:0080073	F:spermidine:coumaroyl_CoA_N-acyltransferase_activity	3	0.134412	Transcript_057799;Transcript_197038;Transcript_220227
GO:0047911	F:galacturan_1,4-alpha-galacturonidase_activity	3	0.138001	Transcript_025932;Transcript_187941;Transcript_222225
GO:0016410	F:N-acyltransferase_activity	3	0.138001	Transcript_057799;Transcript_197038;Transcript_220227
GO:0080075	F:spermidine:feruloyl_CoA_N-acyltransferase_activity	3	0.177343	Transcript_057799;Transcript_197038;Transcript_220227
GO:0052725	F:inositol-1,3,4-trisphosphate_6-kinase_activity	3	0.177343	Transcript_014528;Transcript_031663;Transcript_240214
GO:0080074	F:spermidine:caffeoyl_CoA_N-acyltransferase_activity	3	0.177343	Transcript_057799;Transcript_197038;Transcript_220227
GO:0047325	F:inositol_tetrakisphosphate_1-kinase_activity	3	0.304804	Transcript_014528;Transcript_031663;Transcript_240214
GO:0035242	F:protein-arginine_omega-N_asymmetric_methyltransferase_activity	3	0.304804	Transcript_014508;Transcript_123272;Transcript_200038
GO:0052726	F:inositol-1,3,4-trisphosphate_5-kinase_activity	3	0.304804	Transcript_014528;Transcript_031663;Transcript_240214
GO:0008186	F:RNA-dependent_ATPase_activity	3	0.304804	Transcript_013970;Transcript_025598;Transcript_232525
GO:0070008	F:serine-type_exopeptidase_activity	3	0.502614	Transcript_153193;Transcript_172827;Transcript_195425
GO:0008174	F:mRNA_methyltransferase_activity	3	0.502614	Transcript_149903;Transcript_165031;Transcript_199141
GO:0035035	F:histone_acetyltransferase_binding	3	0.743344	Transcript_015798;Transcript_142487;Transcript_229005
GO:0004831	F:tyrosine-tRNA_ligase_activity	3	1	Transcript_027485;Transcript_043282;Transcript_178982
GO:0051740	F:ethylene_binding	3	1	Transcript_020405;Transcript_196770;Transcript_226660
GO:0003755	F:peptidyl-prolyl_cis-trans_isomerase_activity	2	2.89696e-37	Transcript_108778;Transcript_175511
GO:0030599	F:pectinesterase_activity	2	2.21527e-20	Transcript_003497;Transcript_069670
GO:0015299	F:solute:proton_antiporter_activity	2	1.58219e-17	Transcript_017321;Transcript_191818
GO:0045330	F:aspartyl_esterase_activity	2	4.31576e-16	Transcript_003497;Transcript_069670
GO:0000049	F:tRNA_binding	2	4.31576e-16	Transcript_016005;Transcript_149452
GO:0003993	F:acid_phosphatase_activity	2	5.26408e-15	Transcript_010467;Transcript_028942
GO:0046982	F:protein_heterodimerization_activity	2	6.71578e-14	Transcript_186849;Transcript_194997
GO:0035251	F:UDP-glucosyltransferase_activity	2	8.76455e-13	Transcript_026793;Transcript_087017
GO:0003756	F:protein_disulfide_isomerase_activity	2	1.83327e-12	Transcript_002621;Transcript_040960
GO:0051536	F:iron-sulfur_cluster_binding	2	3.46607e-12	Transcript_096109;Transcript_186722
GO:0004843	F:ubiquitin-specific_protease_activity	2	1.46717e-11	Transcript_009825;Transcript_122153
GO:0015288	F:porin_activity	2	3.02702e-11	Transcript_019608;Transcript_231056
GO:0004707	F:MAP_kinase_activity	2	9.00167e-11	Transcript_026329;Transcript_148996
GO:0051087	F:chaperone_binding	2	1.29565e-10	Transcript_028401;Transcript_133402
GO:0004029	F:aldehyde_dehydrogenase_(NAD)_activity	2	2.68775e-10	Transcript_033844;Transcript_234175
GO:0004402	F:histone_acetyltransferase_activity	2	3.87364e-10	Transcript_204709;Transcript_240717
GO:0019899	F:enzyme_binding	2	8.05592e-10	Transcript_040271;Transcript_157161
GO:0043130	F:ubiquitin_binding	2	1.05338e-09	Transcript_087040;Transcript_209443
GO:0043424	F:protein_histidine_kinase_binding	2	2.15033e-09	Transcript_149718;Transcript_228794
GO:0000062	F:fatty-acyl-CoA_binding	2	6.29333e-09	Transcript_217546;Transcript_237552
GO:0003690	F:double-stranded_DNA_binding	2	1.29057e-08	Transcript_031480;Transcript_236505
GO:0008143	F:poly(A)_binding	2	1.84936e-08	Transcript_026764;Transcript_065762
GO:0004518	F:nuclease_activity	2	1.12436e-07	Transcript_023704;Transcript_028833
GO:0016791	F:phosphatase_activity	2	1.615e-07	Transcript_120546;Transcript_172102
GO:0004535	F:poly(A)-specific_ribonuclease_activity	2	1.615e-07	Transcript_009730;Transcript_016657
GO:0004022	F:alcohol_dehydrogenase_(NAD)_activity	2	2.99722e-07	Transcript_026193;Transcript_104646
GO:0031593	F:polyubiquitin_binding	2	6.07025e-07	Transcript_037498;Transcript_165796
GO:0030234	F:enzyme_regulator_activity	2	6.07025e-07	Transcript_191303;Transcript_226114
GO:0003730	F:mRNA_3'-UTR_binding	2	6.07025e-07	Transcript_023212;Transcript_204561
GO:0008810	F:cellulase_activity	2	8.64424e-07	Transcript_014798;Transcript_031290
GO:0005545	F:1-phosphatidylinositol_binding	2	1.23147e-06	Transcript_033018;Transcript_178285
GO:0032403	F:protein_complex_binding	2	1.23147e-06	Transcript_040180;Transcript_184894
GO:0004565	F:beta-galactosidase_activity	2	1.23147e-06	Transcript_005053;Transcript_223483
GO:0000175	F:3'-5'-exoribonuclease_activity	2	1.75507e-06	Transcript_016657;Transcript_183290
GO:0036459	F:ubiquitinyl_hydrolase_activity	2	5.09159e-06	Transcript_088907;Transcript_096377
GO:0051538	F:3_iron,_4_sulfur_cluster_binding	2	7.26638e-06	Transcript_028047;Transcript_153355
GO:0004315	F:3-oxoacyl-acyl-carrier-protein_synthase_activity	2	1.03729e-05	Transcript_008095;Transcript_242079
GO:0051117	F:ATPase_binding	2	1.93679e-05	Transcript_087040;Transcript_232386
GO:0008948	F:oxaloacetate_decarboxylase_activity	2	1.93679e-05	Transcript_193243;Transcript_236323
GO:0004467	F:long-chain_fatty_acid-CoA_ligase_activity	2	2.73736e-05	Transcript_026760;Transcript_233892
GO:0004739	F:pyruvate_dehydrogenase_(acetyl-transferring)_activity	2	2.73736e-05	Transcript_007938;Transcript_029327
GO:0016717	F:oxidoreductase_activity,_acting_on_paired_donors,_with_oxidation_of_a_pair_of_donors_resulting_in_the_reduction_of_molecular_oxygen_to_two_molecules_of_water	2	3.87017e-05	Transcript_176190;Transcript_199362
GO:0003989	F:acetyl-CoA_carboxylase_activity	2	7.7434e-05	Transcript_233389;Transcript_235657
GO:0003872	F:6-phosphofructokinase_activity	2	7.7434e-05	Transcript_038026;Transcript_213712
GO:0015114	F:phosphate_ion_transmembrane_transporter_activity	2	0.000109574	Transcript_085884;Transcript_215202
GO:0017025	F:TBP-class_protein_binding	2	0.000109574	Transcript_234735;Transcript_241708
GO:0004181	F:metallocarboxypeptidase_activity	2	0.000109574	Transcript_029823;Transcript_230639
GO:0036402	F:proteasome-activating_ATPase_activity	2	0.000219535	Transcript_234735;Transcript_241708
GO:0048040	F:UDP-glucuronate_decarboxylase_activity	2	0.000219535	Transcript_025190;Transcript_233387
GO:0008266	F:poly(U)_RNA_binding	2	0.000219535	Transcript_023301;Transcript_226817
GO:0010333	F:terpene_synthase_activity	2	0.000310795	Transcript_077756;Transcript_239780
GO:0008327	F:methyl-CpG_binding	2	0.000310795	Transcript_027488;Transcript_240717
GO:0004144	F:diacylglycerol_O-acyltransferase_activity	2	0.000439998	Transcript_016897;Transcript_021772
GO:0008483	F:transaminase_activity	2	0.000439998	Transcript_104102;Transcript_214102
GO:0030060	F:L-malate_dehydrogenase_activity	2	0.000583492	Transcript_007900;Transcript_017810
GO:0003678	F:DNA_helicase_activity	2	0.000583492	Transcript_036736;Transcript_041712
GO:0005247	F:voltage-gated_chloride_channel_activity	2	0.000622862	Transcript_043022;Transcript_062728
GO:0003906	F:DNA-(apurinic_or_apyrimidinic_site)_lyase_activity	2	0.000622862	Transcript_143674;Transcript_233893
GO:0017069	F:snRNA_binding	2	0.000817154	Transcript_165598;Transcript_240682
GO:0005459	F:UDP-galactose_transmembrane_transporter_activity	2	0.000817154	Transcript_061254;Transcript_215450
GO:0032266	F:phosphatidylinositol-3-phosphate_binding	2	0.00114453	Transcript_174990;Transcript_234135
GO:0080031	F:methyl_salicylate_esterase_activity	2	0.00160318	Transcript_017874;Transcript_221871
GO:0046556	F:alpha-L-arabinofuranosidase_activity	2	0.00160318	Transcript_014973;Transcript_156289
GO:0005460	F:UDP-glucose_transmembrane_transporter_activity	2	0.00160318	Transcript_061254;Transcript_215450
GO:0008097	F:5S_rRNA_binding	2	0.00160318	Transcript_015971;Transcript_210757
GO:0008320	F:protein_transmembrane_transporter_activity	2	0.00224556	Transcript_083711;Transcript_137810
GO:0031386	F:protein_tag	2	0.00224556	Transcript_048069;Transcript_156448
GO:0004097	F:catechol_oxidase_activity	2	0.00314496	Transcript_162207;Transcript_198102
GO:0003988	F:acetyl-CoA_C-acyltransferase_activity	2	0.00314496	Transcript_016755;Transcript_160618
GO:0005452	F:inorganic_anion_exchanger_activity	2	0.00440347	Transcript_070694;Transcript_135845
GO:0004300	F:enoyl-CoA_hydratase_activity	2	0.00616304	Transcript_079374;Transcript_223630
GO:0004652	F:polynucleotide_adenylyltransferase_activity	2	0.00616304	Transcript_011878;Transcript_222440
GO:0004356	F:glutamate-ammonia_ligase_activity	2	0.00616304	Transcript_018746;Transcript_091631
GO:0000254	F:C-4_methylsterol_oxidase_activity	2	0.00862044	Transcript_018164;Transcript_052099
GO:0008453	F:alanine-glyoxylate_transaminase_activity	2	0.00862044	Transcript_226878;Transcript_243550
GO:0005457	F:GDP-fucose_transmembrane_transporter_activity	2	0.00862044	Transcript_061254;Transcript_215450
GO:0004328	F:formamidase_activity	2	0.00862044	Transcript_030194;Transcript_082227
GO:0008201	F:heparin_binding	2	0.0114486	Transcript_088645;Transcript_240050
GO:0008893	F:guanosine-3',5'-bis(diphosphate)_3'-diphosphatase_activity	2	0.0114486	Transcript_042217;Transcript_224141
GO:0004161	F:dimethylallyltranstransferase_activity	2	0.0114486	Transcript_023190;Transcript_225941
GO:0004337	F:geranyltranstransferase_activity	2	0.0114486	Transcript_023190;Transcript_225941
GO:0019104	F:DNA_N-glycosylase_activity	2	0.0120475	Transcript_143674;Transcript_197824
GO:0004864	F:protein_phosphatase_inhibitor_activity	2	0.0120475	Transcript_152339;Transcript_229938
GO:0047938	F:glucose-6-phosphate_1-epimerase_activity	2	0.0120475	Transcript_010174;Transcript_233995
GO:0004747	F:ribokinase_activity	2	0.0120475	Transcript_005402;Transcript_227092
GO:0004148	F:dihydrolipoyl_dehydrogenase_activity	2	0.0120475	Transcript_020906;Transcript_121426
GO:0017022	F:myosin_binding	2	0.0158279	Transcript_027314;Transcript_032123
GO:0016779	F:nucleotidyltransferase_activity_	2	0.0158279	Transcript_030122;Transcript_149452
GO:0003691	F:double-stranded_telomeric_DNA_binding	2	0.0158279	Transcript_171515;Transcript_185779
GO:0010427	F:abscisic_acid_binding	2	0.0218705	Transcript_152339;Transcript_229938
GO:0005310	F:dicarboxylic_acid_transmembrane_transporter_activity	2	0.030196	Transcript_084246;Transcript_175898
GO:0016798	F:hydrolase_activity,_acting_on_glycosyl_bonds	2	0.030196	Transcript_049632;Transcript_236388
GO:0016151	F:nickel_cation_binding	2	0.030196	Transcript_187768;Transcript_240346
GO:0004750	F:ribulose-phosphate_3-epimerase_activity	2	0.030196	Transcript_108985;Transcript_142152
GO:0004792	F:thiosulfate_sulfurtransferase_activity	2	0.030196	Transcript_102293;Transcript_216545
GO:0008469	F:histone-arginine_N-methyltransferase_activity	2	0.030196	Transcript_014508;Transcript_123272
GO:0004314	F:acyl-carrier-protein_S-malonyltransferase_activity	2	0.0416444	Transcript_095317;Transcript_242079
GO:0004128	F:cytochrome-b5_reductase_activity,_acting_on_NAD(P)H	2	0.0416444	Transcript_050536;Transcript_169480
GO:0005504	F:fatty_acid_binding	2	0.0416444	Transcript_018841;Transcript_059959
GO:0017137	F:Rab_GTPase_binding	2	0.0416444	Transcript_015116;Transcript_044539
GO:0008307	F:structural_constituent_of_muscle	2	0.057345	Transcript_081381;Transcript_225114
GO:0004072	F:aspartate_kinase_activity	2	0.0788008	Transcript_045644;Transcript_157295
GO:0004013	F:adenosylhomocysteinase_activity	2	0.0788008	Transcript_227819;Transcript_237995
GO:0016784	F:3-mercaptopyruvate_sulfurtransferase_activity	2	0.104294	Transcript_102293;Transcript_216545
GO:0004142	F:diacylglycerol_cholinephosphotransferase_activity	2	0.104294	Transcript_026222;Transcript_026934
GO:0031369	F:translation_initiation_factor_binding	2	0.104294	Transcript_136358;Transcript_180390
GO:0070273	F:phosphatidylinositol-4-phosphate_binding	2	0.104294	Transcript_192590;Transcript_240304
GO:0004615	F:phosphomannomutase_activity	2	0.107984	Transcript_009809;Transcript_223241
GO:0015112	F:nitrate_transmembrane_transporter_activity	2	0.107984	Transcript_042300;Transcript_043022
GO:0008835	F:diaminohydroxyphosphoribosylaminopyrimidine_deaminase_activity	2	0.141419	Transcript_013777;Transcript_204443
GO:0052691	F:UDP-arabinopyranose_mutase_activity	2	0.141419	Transcript_015198;Transcript_180358
GO:0004571	F:mannosyl-oligosaccharide_1,2-alpha-mannosidase_activity	2	0.141419	Transcript_004469;Transcript_010111
GO:0030337	F:DNA_polymerase_processivity_factor_activity	2	0.141419	Transcript_015798;Transcript_142487
GO:0016810	F:hydrolase_activity,_acting_on_carbon-nitrogen_(but_not_peptide)_bonds	2	0.141419	Transcript_008582;Transcript_234726
GO:0008428	F:ribonuclease_inhibitor_activity	2	0.141419	Transcript_186722;Transcript_193243
GO:0004751	F:ribose-5-phosphate_isomerase_activity	2	0.141419	Transcript_161222;Transcript_166804
GO:0008478	F:pyridoxal_kinase_activity	2	0.160589	Transcript_072587;Transcript_172211
GO:0000701	F:purine-specific_mismatch_base_pair_DNA_N-glycosylase_activity	2	0.160589	Transcript_015798;Transcript_142487
GO:0032405	F:MutLalpha_complex_binding	2	0.160589	Transcript_015798;Transcript_142487
GO:0032139	F:dinucleotide_insertion_or_deletion_binding	2	0.160589	Transcript_015798;Transcript_142487
GO:0008728	F:GTP_diphosphokinase_activity	2	0.19126	Transcript_042217;Transcript_192556
GO:0047130	F:saccharopine_dehydrogenase_(NADP+,_L-lysine-forming)_activity	2	0.19126	Transcript_160957;Transcript_227947
GO:0047131	F:saccharopine_dehydrogenase_(NAD+,_L-glutamate-forming)_activity	2	0.19126	Transcript_160957;Transcript_227947
GO:0051861	F:glycolipid_binding	2	0.19126	Transcript_170554;Transcript_199534
GO:0017089	F:glycolipid_transporter_activity	2	0.19126	Transcript_170554;Transcript_199534
GO:0043140	F:ATP-dependent_3'-5'_DNA_helicase_activity	2	0.19126	Transcript_026221;Transcript_155807
GO:0047714	F:galactolipase_activity	2	0.257725	Transcript_055067;Transcript_108555
GO:0004307	F:ethanolaminephosphotransferase_activity	2	0.257725	Transcript_026222;Transcript_026934
GO:0004737	F:pyruvate_decarboxylase_activity	2	0.257725	Transcript_000852;Transcript_037155
GO:0000036	F:ACP_phosphopantetheine_attachment_site_binding_involved_in_fatty_acid_biosynthetic_process	2	0.257725	Transcript_020239;Transcript_027173
GO:0031072	F:heat_shock_protein_binding	2	0.257725	Transcript_139813;Transcript_208901
GO:0046538	F:2,3-bisphosphoglycerate-dependent_phosphoglycerate_mutase_activity_	2	0.257725	Transcript_014114;Transcript_016946
GO:0016992	F:lipoate_synthase_activity	2	0.345502	Transcript_015584;Transcript_083010
GO:0017077	F:oxidative_phosphorylation_uncoupler_activity	2	0.345502	Transcript_002810;Transcript_084246
GO:0045431	F:flavonol_synthase_activity	2	0.345502	Transcript_215624;Transcript_220342
GO:0004830	F:tryptophan-tRNA_ligase_activity	2	0.345502	Transcript_206168;Transcript_240340
GO:0010277	F:chlorophyllide_a_oxygenase_overall_activity	2	0.345502	Transcript_032252;Transcript_171704
GO:0004311	F:farnesyltranstransferase_activity	2	0.345502	Transcript_023190;Transcript_156161
GO:0045131	F:pre-mRNA_branch_point_binding	2	0.345502	Transcript_009745;Transcript_147408
GO:0010698	F:acetyltransferase_activator_activity	2	0.452387	Transcript_088645;Transcript_240050
GO:0050236	F:pyridoxine:NADP_4-dehydrogenase_activity	2	0.452387	Transcript_040273;Transcript_162588
GO:0046523	F:S-methyl-5-thioribose-1-phosphate_isomerase_activity	2	0.459823	Transcript_100859;Transcript_108262
GO:0019788	F:NEDD8_transferase_activity	2	0.459823	Transcript_083204;Transcript_112483
GO:0003937	F:IMP_cyclohydrolase_activity	2	0.459823	Transcript_209045;Transcript_228479
GO:0008146	F:sulfotransferase_activity	2	0.459823	Transcript_025940;Transcript_041372
GO:0004643	F:phosphoribosylaminoimidazolecarboxamide_formyltransferase_activity	2	0.459823	Transcript_209045;Transcript_228479
GO:0004034	F:aldose_1-epimerase_activity	2	0.595789	Transcript_043532;Transcript_229106
GO:0080146	F:L-cysteine_desulfhydrase_activity	2	0.595789	Transcript_000030;Transcript_006748
GO:0035250	F:UDP-galactosyltransferase_activity	2	0.657503	Transcript_180845;Transcript_239329
GO:0030971	F:receptor_tyrosine_kinase_binding	2	0.657503	Transcript_015798;Transcript_142487
GO:0017151	F:DEAD/H-box_RNA_helicase_binding	2	0.700387	Transcript_167220;Transcript_224847
GO:0000224	F:peptide-N4-(N-acetyl-beta-glucosaminyl)asparagine_amidase_activity	2	0.77749	Transcript_018958;Transcript_229796
GO:0046404	F:ATP-dependent_polydeoxyribonucleotide_5'-hydroxyl-kinase_activity	2	0.77749	Transcript_202654;Transcript_227802
GO:0004419	F:hydroxymethylglutaryl-CoA_lyase_activity	2	0.77749	Transcript_016624;Transcript_021346
GO:0004719	F:protein-L-isoaspartate_(D-aspartate)_O-methyltransferase_activity	2	1	Transcript_031559;Transcript_096298
GO:0016274	F:protein-arginine_N-methyltransferase_activity	2	1	Transcript_014508;Transcript_200038
GO:0008442	F:3-hydroxyisobutyrate_dehydrogenase_activity	2	1	Transcript_021635;Transcript_149539
GO:0004476	F:mannose-6-phosphate_isomerase_activity_	2	1	Transcript_224440;Transcript_230751
GO:0070182	F:DNA_polymerase_binding	2	1	Transcript_015798;Transcript_142487

## Sheet: GOBP
Category	Description	#Genes	pValue	Genes
GO:0006351	P:transcription,_DNA-templated	180	0	Transcript_000082;Transcript_006542;Transcript_006557;Transcript_006795;Transcript_007694;Transcript_008176;Transcript_009704;Transcript_009730;Transcript_009760;Transcript_009825;Transcript_011939;Transcript_012568;Transcript_013042;Transcript_013172;Transcript_014508;Transcript_016001;Transcript_016179;Transcript_016420;Transcript_016473;Transcript_016601;Transcript_016657;Transcript_016698;Tra…
GO:0006355	P:regulation_of_transcription,_DNA-templated	133	4.940656e-324	Transcript_000082;Transcript_003302;Transcript_005845;Transcript_006467;Transcript_009704;Transcript_009730;Transcript_009825;Transcript_011939;Transcript_012568;Transcript_013042;Transcript_013172;Transcript_014344;Transcript_014508;Transcript_016024;Transcript_016179;Transcript_016657;Transcript_016698;Transcript_017450;Transcript_018221;Transcript_018802;Transcript_018858;Transcript_020746;Tra…
GO:0006412	P:translation	66	1.10999e-188	Transcript_001111;Transcript_004470;Transcript_006434;Transcript_006602;Transcript_007059;Transcript_007649;Transcript_007679;Transcript_009505;Transcript_013258;Transcript_013664;Transcript_015971;Transcript_016218;Transcript_017394;Transcript_017396;Transcript_018304;Transcript_018528;Transcript_022570;Transcript_022733;Transcript_026269;Transcript_026774;Transcript_030297;Transcript_032203;Tra…
GO:0016567	P:protein_ubiquitination	52	1.59848e-164	Transcript_004649;Transcript_008202;Transcript_008597;Transcript_008823;Transcript_013734;Transcript_014759;Transcript_014881;Transcript_016689;Transcript_018519;Transcript_021020;Transcript_023102;Transcript_028007;Transcript_030009;Transcript_031434;Transcript_031835;Transcript_031866;Transcript_032532;Transcript_033045;Transcript_044014;Transcript_046257;Transcript_048069;Transcript_083204;Tra…
GO:0006952	P:defense_response	49	3.04706e-132	Transcript_007304;Transcript_008678;Transcript_014870;Transcript_014881;Transcript_016204;Transcript_018718;Transcript_020324;Transcript_023102;Transcript_026329;Transcript_033045;Transcript_033383;Transcript_041372;Transcript_061772;Transcript_088334;Transcript_096837;Transcript_097377;Transcript_122229;Transcript_125015;Transcript_134246;Transcript_147921;Transcript_149601;Transcript_158717;Tra…
GO:0046777	P:protein_autophosphorylation	44	5.50076e-132	Transcript_000361;Transcript_007427;Transcript_009970;Transcript_010355;Transcript_012506;Transcript_014265;Transcript_019961;Transcript_026258;Transcript_034582;Transcript_037105;Transcript_053567;Transcript_079340;Transcript_081569;Transcript_093212;Transcript_095793;Transcript_100502;Transcript_107140;Transcript_127606;Transcript_145272;Transcript_157999;Transcript_159854;Transcript_163320;Tra…
GO:0005975	P:carbohydrate_metabolic_process	43	1.12057e-105	Transcript_005053;Transcript_007900;Transcript_008678;Transcript_010174;Transcript_011228;Transcript_016328;Transcript_017810;Transcript_017853;Transcript_023370;Transcript_025932;Transcript_041445;Transcript_043532;Transcript_064798;Transcript_075347;Transcript_077036;Transcript_078260;Transcript_108985;Transcript_144405;Transcript_153867;Transcript_155913;Transcript_176122;Transcript_180845;Tra…
GO:0071555	P:cell_wall_organization	42	1.98077e-96	Transcript_004851;Transcript_005015;Transcript_012883;Transcript_014494;Transcript_014798;Transcript_015198;Transcript_016328;Transcript_025565;Transcript_025932;Transcript_027303;Transcript_031041;Transcript_031290;Transcript_035627;Transcript_046845;Transcript_051590;Transcript_058380;Transcript_074927;Transcript_077461;Transcript_087796;Transcript_101405;Transcript_105933;Transcript_136126;Tra…
GO:0051301	P:cell_division	40	1.12178e-78	Transcript_000211;Transcript_001031;Transcript_003302;Transcript_007763;Transcript_008616;Transcript_015116;Transcript_016024;Transcript_016237;Transcript_016485;Transcript_020142;Transcript_027057;Transcript_027192;Transcript_029712;Transcript_031363;Transcript_031434;Transcript_033017;Transcript_033208;Transcript_034661;Transcript_038402;Transcript_044539;Transcript_048706;Transcript_081381;Tra…
GO:0006397	P:mRNA_processing	39	4.1517e-64	Transcript_006795;Transcript_007427;Transcript_014265;Transcript_023301;Transcript_026077;Transcript_026515;Transcript_026764;Transcript_034582;Transcript_041888;Transcript_048932;Transcript_065762;Transcript_066301;Transcript_081569;Transcript_097610;Transcript_131597;Transcript_149080;Transcript_149420;Transcript_153181;Transcript_155268;Transcript_158530;Transcript_167985;Transcript_175896;Tra…
GO:0015031	P:protein_transport	37	6.37389e-138	Transcript_004155;Transcript_004905;Transcript_006150;Transcript_010537;Transcript_017347;Transcript_018712;Transcript_022145;Transcript_023404;Transcript_023676;Transcript_027098;Transcript_027175;Transcript_031747;Transcript_032252;Transcript_034316;Transcript_043468;Transcript_045968;Transcript_062135;Transcript_080040;Transcript_082198;Transcript_118749;Transcript_148169;Transcript_158532;Tra…
GO:0006886	P:intracellular_protein_transport	29	2.46228e-78	Transcript_001104;Transcript_002675;Transcript_008354;Transcript_015783;Transcript_015947;Transcript_018757;Transcript_025370;Transcript_039199;Transcript_041422;Transcript_043014;Transcript_043468;Transcript_044971;Transcript_065327;Transcript_096106;Transcript_101433;Transcript_119088;Transcript_147891;Transcript_156026;Transcript_176002;Transcript_184894;Transcript_185131;Transcript_187119;Tra…
GO:0009651	P:response_to_salt_stress	27	5.57355e-113	Transcript_003302;Transcript_005015;Transcript_006390;Transcript_007694;Transcript_031559;Transcript_038402;Transcript_041372;Transcript_042062;Transcript_042883;Transcript_063895;Transcript_096297;Transcript_099209;Transcript_103275;Transcript_143778;Transcript_150574;Transcript_155240;Transcript_170163;Transcript_184704;Transcript_185552;Transcript_185779;Transcript_192119;Transcript_209211;Tra…
GO:0009734	P:auxin-activated_signaling_pathway	26	8.09551e-60	Transcript_018802;Transcript_019743;Transcript_022445;Transcript_028007;Transcript_028447;Transcript_030667;Transcript_034176;Transcript_041922;Transcript_061518;Transcript_080441;Transcript_135542;Transcript_149776;Transcript_155731;Transcript_181018;Transcript_192644;Transcript_192715;Transcript_195811;Transcript_196414;Transcript_200461;Transcript_201458;Transcript_218673;Transcript_225964;Tra…
GO:0008380	P:RNA_splicing	26	1.30766e-43	Transcript_006795;Transcript_026515;Transcript_034582;Transcript_041888;Transcript_048932;Transcript_051286;Transcript_066301;Transcript_097610;Transcript_131597;Transcript_149080;Transcript_149420;Transcript_153181;Transcript_158530;Transcript_159255;Transcript_167985;Transcript_175896;Transcript_187789;Transcript_193507;Transcript_195453;Transcript_208090;Transcript_208937;Transcript_220063;Tra…
GO:0009755	P:hormone-mediated_signaling_pathway	25	8.29271e-93	Transcript_006542;Transcript_009970;Transcript_010355;Transcript_026258;Transcript_093212;Transcript_095793;Transcript_100502;Transcript_127606;Transcript_157999;Transcript_163320;Transcript_167277;Transcript_170391;Transcript_182614;Transcript_191180;Transcript_191679;Transcript_195263;Transcript_197004;Transcript_199469;Transcript_203446;Transcript_222241;Transcript_223826;Transcript_230943;Tra…
GO:0007178	P:transmembrane_receptor_protein_serine/threonine_kinase_signaling_pathway	25	3.65496e-91	Transcript_009970;Transcript_010355;Transcript_026258;Transcript_093212;Transcript_095793;Transcript_100502;Transcript_127606;Transcript_157999;Transcript_163320;Transcript_167277;Transcript_168520;Transcript_170391;Transcript_182614;Transcript_191180;Transcript_191679;Transcript_195263;Transcript_197004;Transcript_199469;Transcript_203446;Transcript_222241;Transcript_223826;Transcript_230943;Tra…
GO:0009737	P:response_to_abscisic_acid	24	1.62396e-75	Transcript_007694;Transcript_018802;Transcript_024005;Transcript_025598;Transcript_031559;Transcript_034176;Transcript_042062;Transcript_096297;Transcript_097775;Transcript_156161;Transcript_168520;Transcript_170163;Transcript_179976;Transcript_185779;Transcript_192119;Transcript_192644;Transcript_194997;Transcript_201458;Transcript_209986;Transcript_224727;Transcript_229938;Transcript_232525;Tra…
GO:0009793	P:embryo_development_ending_in_seed_dormancy	24	7.67524e-53	Transcript_002021;Transcript_005403;Transcript_008095;Transcript_013672;Transcript_018082;Transcript_020142;Transcript_028007;Transcript_035046;Transcript_043282;Transcript_044327;Transcript_048706;Transcript_061518;Transcript_096084;Transcript_102293;Transcript_149776;Transcript_152324;Transcript_173748;Transcript_178982;Transcript_182614;Transcript_195263;Transcript_216545;Transcript_218059;Tra…
GO:0009414	P:response_to_water_deprivation	23	4.17966e-62	Transcript_024005;Transcript_026193;Transcript_028447;Transcript_031557;Transcript_042062;Transcript_042145;Transcript_063895;Transcript_090430;Transcript_099209;Transcript_103275;Transcript_145272;Transcript_147921;Transcript_150574;Transcript_155240;Transcript_156161;Transcript_156926;Transcript_181429;Transcript_185552;Transcript_192119;Transcript_225177;Transcript_225582;Transcript_227686;Tra…
GO:0007275	P:multicellular_organismal_development	22	3.68682e-75	Transcript_009704;Transcript_015116;Transcript_019060;Transcript_022100;Transcript_025456;Transcript_028368;Transcript_029089;Transcript_041113;Transcript_044539;Transcript_089427;Transcript_100197;Transcript_101405;Transcript_109626;Transcript_140451;Transcript_196414;Transcript_216007;Transcript_222323;Transcript_224109;Transcript_227255;Transcript_228967;Transcript_231660;Transcript_242291
GO:0055114	P:oxidation-reduction_process	22	4.98737e-57	Transcript_009053;Transcript_009692;Transcript_013777;Transcript_014604;Transcript_015584;Transcript_017917;Transcript_018784;Transcript_020239;Transcript_037644;Transcript_041922;Transcript_044737;Transcript_058642;Transcript_083010;Transcript_156926;Transcript_158955;Transcript_193233;Transcript_223263;Transcript_228049;Transcript_230655;Transcript_232471;Transcript_235200;Transcript_241845
GO:0046686	P:response_to_cadmium_ion	21	3.36417e-69	Transcript_006334;Transcript_006675;Transcript_010828;Transcript_011264;Transcript_015798;Transcript_022974;Transcript_035390;Transcript_044198;Transcript_046112;Transcript_096297;Transcript_121426;Transcript_142487;Transcript_147891;Transcript_157859;Transcript_185779;Transcript_199741;Transcript_203246;Transcript_206170;Transcript_230419;Transcript_230751;Transcript_238051
GO:0006979	P:response_to_oxidative_stress	21	1.28548e-57	Transcript_001865;Transcript_011264;Transcript_014512;Transcript_018511;Transcript_018802;Transcript_027279;Transcript_031909;Transcript_034176;Transcript_035390;Transcript_042062;Transcript_042145;Transcript_060152;Transcript_156926;Transcript_157859;Transcript_170163;Transcript_190763;Transcript_196627;Transcript_197824;Transcript_233284;Transcript_238422;Transcript_239152
GO:0007049	P:cell_cycle_	21	6.09422e-45	Transcript_001031;Transcript_008616;Transcript_015116;Transcript_016024;Transcript_016485;Transcript_029712;Transcript_034661;Transcript_044539;Transcript_061518;Transcript_129702;Transcript_143778;Transcript_146959;Transcript_149776;Transcript_160578;Transcript_184234;Transcript_195854;Transcript_195934;Transcript_197413;Transcript_198556;Transcript_201468;Transcript_230984
GO:0009611	P:response_to_wounding	21	6.10339e-40	Transcript_007694;Transcript_014461;Transcript_016431;Transcript_020324;Transcript_023102;Transcript_028447;Transcript_031663;Transcript_033045;Transcript_038206;Transcript_042062;Transcript_042145;Transcript_042248;Transcript_044528;Transcript_090430;Transcript_159449;Transcript_176865;Transcript_181429;Transcript_193866;Transcript_202542;Transcript_230274;Transcript_242340
GO:0006511	P:ubiquitin-dependent_protein_catabolic_process	21	5.10534e-39	Transcript_008163;Transcript_008597;Transcript_009825;Transcript_014759;Transcript_022485;Transcript_025456;Transcript_028007;Transcript_029089;Transcript_048069;Transcript_052856;Transcript_088907;Transcript_096377;Transcript_100197;Transcript_123520;Transcript_123857;Transcript_156818;Transcript_209986;Transcript_213671;Transcript_215401;Transcript_222527;Transcript_243787
GO:0006457	P:protein_folding	20	2.24399e-89	Transcript_002621;Transcript_003016;Transcript_014604;Transcript_025598;Transcript_026452;Transcript_029746;Transcript_037644;Transcript_045319;Transcript_048202;Transcript_095486;Transcript_110097;Transcript_133402;Transcript_149814;Transcript_156926;Transcript_157570;Transcript_166879;Transcript_175511;Transcript_194549;Transcript_208901;Transcript_211478
GO:0016192	P:vesicle-mediated_transport	20	3.36473e-61	Transcript_010537;Transcript_014681;Transcript_015947;Transcript_017347;Transcript_018082;Transcript_018712;Transcript_018757;Transcript_021558;Transcript_023676;Transcript_025510;Transcript_041422;Transcript_044971;Transcript_048363;Transcript_096106;Transcript_156026;Transcript_169723;Transcript_187119;Transcript_196018;Transcript_218015;Transcript_226688
GO:0006281	P:DNA_repair	20	4.42233e-57	Transcript_009825;Transcript_015798;Transcript_022196;Transcript_023610;Transcript_026221;Transcript_031480;Transcript_090284;Transcript_142487;Transcript_145917;Transcript_155807;Transcript_197824;Transcript_202654;Transcript_206107;Transcript_212191;Transcript_215297;Transcript_224333;Transcript_227802;Transcript_229005;Transcript_233893;Transcript_236505
GO:0009873	P:ethylene-activated_signaling_pathway	20	3.09405e-39	Transcript_002675;Transcript_020405;Transcript_025995;Transcript_028007;Transcript_042206;Transcript_061518;Transcript_096084;Transcript_104433;Transcript_145272;Transcript_149776;Transcript_156818;Transcript_161009;Transcript_193866;Transcript_196770;Transcript_221802;Transcript_222544;Transcript_226660;Transcript_227255;Transcript_227686;Transcript_240304
GO:0006810	P:transport	19	2.53299e-50	Transcript_001031;Transcript_013575;Transcript_015898;Transcript_016377;Transcript_016485;Transcript_026322;Transcript_029712;Transcript_034709;Transcript_042022;Transcript_059959;Transcript_087041;Transcript_157571;Transcript_189533;Transcript_201819;Transcript_217546;Transcript_219033;Transcript_225082;Transcript_233470;Transcript_237958
GO:0009738	P:abscisic_acid-activated_signaling_pathway	19	7.18723e-48	Transcript_018802;Transcript_024005;Transcript_025370;Transcript_028795;Transcript_034176;Transcript_113548;Transcript_145272;Transcript_152339;Transcript_163061;Transcript_192119;Transcript_195377;Transcript_201137;Transcript_202384;Transcript_220376;Transcript_222613;Transcript_224727;Transcript_229938;Transcript_235878;Transcript_239667
GO:0009408	P:response_to_heat	18	3.3835e-43	Transcript_003016;Transcript_006675;Transcript_019684;Transcript_020324;Transcript_025821;Transcript_026193;Transcript_026424;Transcript_136358;Transcript_139661;Transcript_169635;Transcript_185552;Transcript_211478;Transcript_215297;Transcript_222677;Transcript_228895;Transcript_232525;Transcript_235302;Transcript_242959
GO:0042742	P:defense_response_to_bacterium	17	1.05808e-68	Transcript_012060;Transcript_014461;Transcript_015927;Transcript_016657;Transcript_023102;Transcript_033045;Transcript_061772;Transcript_100502;Transcript_142152;Transcript_166804;Transcript_167228;Transcript_191165;Transcript_196773;Transcript_197004;Transcript_202542;Transcript_222544;Transcript_238051
GO:0045454	P:cell_redox_homeostasis	16	1.70325e-46	Transcript_002621;Transcript_006334;Transcript_014604;Transcript_019529;Transcript_020906;Transcript_026795;Transcript_035963;Transcript_037644;Transcript_040960;Transcript_042883;Transcript_065403;Transcript_121426;Transcript_156926;Transcript_223304;Transcript_230068;Transcript_233284
GO:0050832	P:defense_response_to_fungus	16	8.90316e-43	Transcript_023102;Transcript_027836;Transcript_033045;Transcript_041692;Transcript_061772;Transcript_082888;Transcript_108837;Transcript_162578;Transcript_167228;Transcript_181429;Transcript_190763;Transcript_198878;Transcript_202542;Transcript_220063;Transcript_238051;Transcript_243354
GO:0043161	P:proteasome-mediated_ubiquitin-dependent_protein_catabolic_process	16	1.3656e-35	Transcript_002519;Transcript_014881;Transcript_018525;Transcript_021735;Transcript_087040;Transcript_090430;Transcript_122153;Transcript_122229;Transcript_122859;Transcript_131551;Transcript_165796;Transcript_191303;Transcript_222527;Transcript_226114;Transcript_227452;Transcript_233151
GO:0009753	P:response_to_jasmonic_acid	16	9.20845e-26	Transcript_007304;Transcript_023102;Transcript_028447;Transcript_033045;Transcript_061518;Transcript_096297;Transcript_149776;Transcript_159449;Transcript_181429;Transcript_185779;Transcript_196773;Transcript_202542;Transcript_217546;Transcript_224109;Transcript_230274;Transcript_238051
GO:0055085	P:transmembrane_transport	15	4.64355e-60	Transcript_009070;Transcript_026322;Transcript_031605;Transcript_043294;Transcript_118749;Transcript_169520;Transcript_186722;Transcript_200150;Transcript_204657;Transcript_211117;Transcript_219033;Transcript_222312;Transcript_231056;Transcript_235192;Transcript_235414
GO:0006633	P:fatty_acid_biosynthetic_process	15	7.34749e-48	Transcript_005449;Transcript_008095;Transcript_009494;Transcript_018164;Transcript_021257;Transcript_027173;Transcript_034041;Transcript_052099;Transcript_095317;Transcript_153867;Transcript_186225;Transcript_203659;Transcript_233389;Transcript_235657;Transcript_242079
GO:0006470	P:protein_dephosphorylation	15	1.66766e-45	Transcript_011923;Transcript_013342;Transcript_013781;Transcript_015425;Transcript_016017;Transcript_019538;Transcript_022802;Transcript_024005;Transcript_027279;Transcript_031850;Transcript_059763;Transcript_087103;Transcript_139813;Transcript_225177;Transcript_237889
GO:0006096	P:glycolytic_process	15	8.23513e-40	Transcript_007938;Transcript_014114;Transcript_016946;Transcript_027666;Transcript_029327;Transcript_038026;Transcript_042582;Transcript_062774;Transcript_089776;Transcript_148826;Transcript_148905;Transcript_150940;Transcript_203310;Transcript_213712;Transcript_230358
GO:0016042	P:lipid_catabolic_process	15	4.91182e-39	Transcript_021881;Transcript_041988;Transcript_042206;Transcript_055067;Transcript_070780;Transcript_108555;Transcript_167693;Transcript_176855;Transcript_187315;Transcript_188434;Transcript_195839;Transcript_226191;Transcript_226265;Transcript_226282;Transcript_233880
GO:0009555	P:pollen_development	15	9.57434e-35	Transcript_009001;Transcript_035046;Transcript_036091;Transcript_057799;Transcript_061772;Transcript_088132;Transcript_141694;Transcript_153953;Transcript_155818;Transcript_188668;Transcript_196412;Transcript_196773;Transcript_197038;Transcript_220227;Transcript_222019
GO:0045892	P:negative_regulation_of_transcription,_DNA-templated	15	2.36814e-32	Transcript_025821;Transcript_028211;Transcript_042062;Transcript_042145;Transcript_101332;Transcript_153091;Transcript_169635;Transcript_192644;Transcript_193507;Transcript_198631;Transcript_208090;Transcript_212191;Transcript_229810;Transcript_235625;Transcript_238051
GO:0009733	P:response_to_auxin	14	1.62356e-45	Transcript_018317;Transcript_019743;Transcript_028447;Transcript_038402;Transcript_042145;Transcript_061518;Transcript_149776;Transcript_185779;Transcript_188104;Transcript_195811;Transcript_218673;Transcript_236452;Transcript_238051;Transcript_242340
GO:0006364	P:rRNA_processing	14	4.45927e-38	Transcript_003601;Transcript_013970;Transcript_020362;Transcript_027323;Transcript_032315;Transcript_079296;Transcript_129702;Transcript_157447;Transcript_167806;Transcript_205205;Transcript_227688;Transcript_229956;Transcript_231660;Transcript_239729
GO:0006629	P:lipid_metabolic_process	14	1.48081e-25	Transcript_005986;Transcript_011264;Transcript_018502;Transcript_022530;Transcript_024035;Transcript_034054;Transcript_035390;Transcript_042206;Transcript_059666;Transcript_139231;Transcript_149716;Transcript_157859;Transcript_166298;Transcript_175075
GO:0016568	P:chromatin_modification	14	2.38674e-24	Transcript_023610;Transcript_027836;Transcript_037498;Transcript_063895;Transcript_082825;Transcript_099209;Transcript_150574;Transcript_153091;Transcript_184165;Transcript_195393;Transcript_222148;Transcript_224333;Transcript_235950;Transcript_240345
GO:0006310	P:DNA_recombination	14	1.82152e-16	Transcript_009825;Transcript_016415;Transcript_022196;Transcript_026221;Transcript_090284;Transcript_130853;Transcript_155389;Transcript_155807;Transcript_188668;Transcript_196318;Transcript_206170;Transcript_215297;Transcript_222943;Transcript_236505
GO:0007067	P:mitotic_nuclear_division	13	1.25058e-43	Transcript_000211;Transcript_007763;Transcript_018082;Transcript_027057;Transcript_029875;Transcript_031434;Transcript_033017;Transcript_033208;Transcript_137697;Transcript_173351;Transcript_189533;Transcript_208085;Transcript_225636
GO:0009723	P:response_to_ethylene	13	6.53489e-21	Transcript_007304;Transcript_025995;Transcript_038402;Transcript_090430;Transcript_096297;Transcript_145272;Transcript_156818;Transcript_166590;Transcript_185779;Transcript_217546;Transcript_222544;Transcript_227686;Transcript_240304
GO:0009751	P:response_to_salicylic_acid	13	6.93042e-18	Transcript_007304;Transcript_007694;Transcript_020324;Transcript_034582;Transcript_041372;Transcript_042206;Transcript_096297;Transcript_181429;Transcript_185779;Transcript_199534;Transcript_224109;Transcript_238051;Transcript_240304
GO:0009908	P:flower_development	12	4.69866e-63	Transcript_011878;Transcript_012568;Transcript_042145;Transcript_079374;Transcript_108837;Transcript_143265;Transcript_169244;Transcript_181238;Transcript_182308;Transcript_196215;Transcript_196773;Transcript_222390
GO:0045893	P:positive_regulation_of_transcription,_DNA-templated	12	9.34961e-58	Transcript_006542;Transcript_006557;Transcript_011939;Transcript_042145;Transcript_055024;Transcript_108837;Transcript_143778;Transcript_149060;Transcript_180831;Transcript_187506;Transcript_210991;Transcript_239667
GO:0015979	P:photosynthesis	12	1.246e-40	Transcript_015584;Transcript_015999;Transcript_024497;Transcript_026572;Transcript_042062;Transcript_079322;Transcript_083010;Transcript_101984;Transcript_223819;Transcript_229399;Transcript_229806;Transcript_240051
GO:0040008	P:regulation_of_growth	12	3.53214e-27	Transcript_009286;Transcript_011266;Transcript_019060;Transcript_022653;Transcript_082825;Transcript_154573;Transcript_172934;Transcript_186849;Transcript_196414;Transcript_209211;Transcript_222148;Transcript_243720
GO:0006099	P:tricarboxylic_acid_cycle	12	8.32176e-26	Transcript_007900;Transcript_016540;Transcript_017810;Transcript_023212;Transcript_031909;Transcript_089463;Transcript_098323;Transcript_156988;Transcript_203816;Transcript_222306;Transcript_233806;Transcript_236821
GO:0008283	P:cell_proliferation	12	1.64956e-20	Transcript_015116;Transcript_015798;Transcript_018802;Transcript_024541;Transcript_034176;Transcript_044539;Transcript_083204;Transcript_142487;Transcript_157447;Transcript_201468;Transcript_210757;Transcript_231660
GO:0048366	P:leaf_development	12	1.29891e-17	Transcript_011878;Transcript_013781;Transcript_016473;Transcript_031558;Transcript_044327;Transcript_061518;Transcript_074557;Transcript_149776;Transcript_176239;Transcript_182308;Transcript_212191;Transcript_225726
GO:0007165	P:signal_transduction	11	5.14099e-43	Transcript_012966;Transcript_015977;Transcript_023274;Transcript_027836;Transcript_030740;Transcript_043875;Transcript_093206;Transcript_096671;Transcript_128635;Transcript_154489;Transcript_236384
GO:0009626	P:plant-type_hypersensitive_response	11	5.49144e-36	Transcript_026681;Transcript_027731;Transcript_032150;Transcript_042206;Transcript_044014;Transcript_089943;Transcript_172479;Transcript_173427;Transcript_202685;Transcript_232040;Transcript_240304
GO:0009735	P:response_to_cytokinin	11	1.38989e-25	Transcript_000211;Transcript_007763;Transcript_014604;Transcript_018416;Transcript_018511;Transcript_020313;Transcript_024208;Transcript_025874;Transcript_026269;Transcript_117469;Transcript_166804
GO:0008643	P:carbohydrate_transport	11	3.49088e-16	Transcript_004778;Transcript_006913;Transcript_027427;Transcript_034534;Transcript_044160;Transcript_097999;Transcript_158070;Transcript_230685;Transcript_233903;Transcript_235414;Transcript_236807
GO:0009617	P:response_to_bacterium	11	4.62647e-14	Transcript_021247;Transcript_042145;Transcript_042206;Transcript_046886;Transcript_077638;Transcript_145272;Transcript_181429;Transcript_213719;Transcript_225582;Transcript_230274;Transcript_241709
GO:0009409	P:response_to_cold	10	3.386e-83	Transcript_003016;Transcript_020324;Transcript_024005;Transcript_025598;Transcript_042062;Transcript_049892;Transcript_090430;Transcript_185552;Transcript_232525;Transcript_243612
GO:0048364	P:root_development	10	4.79996e-33	Transcript_020142;Transcript_092175;Transcript_109577;Transcript_152324;Transcript_165034;Transcript_180831;Transcript_182308;Transcript_201458;Transcript_209443;Transcript_224333
GO:0007264	P:small_GTPase_mediated_signal_transduction	10	2.00843e-32	Transcript_016567;Transcript_017347;Transcript_018712;Transcript_023404;Transcript_027057;Transcript_080040;Transcript_113548;Transcript_173748;Transcript_196706;Transcript_225636
GO:0016311	P:dephosphorylation	10	4.11565e-30	Transcript_008396;Transcript_010467;Transcript_019778;Transcript_028942;Transcript_035318;Transcript_120546;Transcript_149112;Transcript_172102;Transcript_204604;Transcript_223426
GO:0006417	P:regulation_of_translation	10	4.7509e-29	Transcript_006236;Transcript_009704;Transcript_016483;Transcript_136358;Transcript_155268;Transcript_158530;Transcript_223074;Transcript_225044;Transcript_234158;Transcript_243161
GO:0009909	P:regulation_of_flower_development	10	6.33485e-22	Transcript_000361;Transcript_023102;Transcript_033045;Transcript_042145;Transcript_096084;Transcript_108837;Transcript_144160;Transcript_202542;Transcript_231234;Transcript_242667
GO:0007018	P:microtubule-based_movement	10	1.90305e-20	Transcript_001256;Transcript_009001;Transcript_016377;Transcript_050497;Transcript_154820;Transcript_163901;Transcript_175416;Transcript_183925;Transcript_199471;Transcript_227602
GO:0018298	P:protein-chromophore_linkage	10	2.8121e-19	Transcript_005179;Transcript_018416;Transcript_043402;Transcript_109012;Transcript_145533;Transcript_152342;Transcript_155928;Transcript_194992;Transcript_201460;Transcript_237130
GO:0009867	P:jasmonic_acid_mediated_signaling_pathway	10	2.48197e-09	Transcript_014461;Transcript_023102;Transcript_033045;Transcript_061518;Transcript_108837;Transcript_149776;Transcript_196773;Transcript_199186;Transcript_202542;Transcript_227686
GO:0006468	P:protein_phosphorylation	9	6.13366e-50	Transcript_000361;Transcript_031338;Transcript_033017;Transcript_100570;Transcript_169722;Transcript_187639;Transcript_188104;Transcript_192590;Transcript_244669
GO:0000398	P:mRNA_splicing,_via_spliceosome	9	3.8523e-42	Transcript_042932;Transcript_144160;Transcript_149420;Transcript_159255;Transcript_165598;Transcript_188701;Transcript_191819;Transcript_212567;Transcript_240682
GO:0006260	P:DNA_replication	9	1.01956e-28	Transcript_026221;Transcript_036736;Transcript_047736;Transcript_090284;Transcript_144160;Transcript_155807;Transcript_189362;Transcript_196318;Transcript_236505
GO:0015991	P:ATP_hydrolysis_coupled_proton_transport	9	4.16217e-26	Transcript_004585;Transcript_009757;Transcript_023555;Transcript_080670;Transcript_168752;Transcript_201255;Transcript_230521;Transcript_235352;Transcript_239369
GO:0009416	P:response_to_light_stimulus	9	8.03832e-24	Transcript_016420;Transcript_163988;Transcript_187753;Transcript_217546;Transcript_230751;Transcript_231234;Transcript_231533;Transcript_242340;Transcript_242667
GO:0006888	P:ER_to_Golgi_vesicle-mediated_transport	9	2.76814e-21	Transcript_001104;Transcript_015783;Transcript_039015;Transcript_043014;Transcript_147891;Transcript_161644;Transcript_184894;Transcript_194884;Transcript_223956
GO:0042254	P:ribosome_biogenesis	9	2.40841e-19	Transcript_007868;Transcript_017225;Transcript_035138;Transcript_041888;Transcript_146844;Transcript_188939;Transcript_226154;Transcript_229572;Transcript_233893
GO:0006508	P:proteolysis	9	4.8122e-19	Transcript_022485;Transcript_029823;Transcript_031618;Transcript_078776;Transcript_083204;Transcript_156977;Transcript_166298;Transcript_197673;Transcript_227452
GO:0006869	P:lipid_transport	9	3.6584e-18	Transcript_018841;Transcript_029492;Transcript_053565;Transcript_059959;Transcript_087883;Transcript_150018;Transcript_217546;Transcript_219033;Transcript_233419
GO:0031047	P:gene_silencing_by_RNA	9	4.01477e-17	Transcript_009704;Transcript_013527;Transcript_013909;Transcript_031558;Transcript_177859;Transcript_206484;Transcript_220063;Transcript_237979;Transcript_242218
GO:0009965	P:leaf_morphogenesis	9	2.27939e-15	Transcript_018802;Transcript_034176;Transcript_061772;Transcript_092175;Transcript_188104;Transcript_210757;Transcript_214662;Transcript_238051;Transcript_240169
GO:0006396	P:RNA_processing	9	9.01747e-12	Transcript_013172;Transcript_149903;Transcript_151404;Transcript_155268;Transcript_165031;Transcript_175896;Transcript_183290;Transcript_199141;Transcript_226817
GO:0035556	P:intracellular_signal_transduction	8	1.00085e-35	Transcript_027279;Transcript_100570;Transcript_169722;Transcript_201137;Transcript_202384;Transcript_220376;Transcript_235878;Transcript_244669
GO:0006897	P:endocytosis	8	1.56091e-33	Transcript_022145;Transcript_027502;Transcript_033018;Transcript_041385;Transcript_043468;Transcript_101433;Transcript_178285;Transcript_236530
GO:0016032	P:viral_process	8	2.09897e-30	Transcript_026774;Transcript_028007;Transcript_043594;Transcript_046112;Transcript_186722;Transcript_188104;Transcript_227686;Transcript_235625
GO:0015074	P:DNA_integration	8	3.51688e-25	Transcript_016415;Transcript_049116;Transcript_084112;Transcript_130853;Transcript_158012;Transcript_176415;Transcript_197515;Transcript_222943
GO:0043547	P:positive_regulation_of_GTPase_activity	8	2.08748e-24	Transcript_015116;Transcript_016560;Transcript_028795;Transcript_043014;Transcript_043402;Transcript_044539;Transcript_136358;Transcript_194992
GO:0010150	P:leaf_senescence	8	3.37176e-23	Transcript_042206;Transcript_055024;Transcript_061772;Transcript_159124;Transcript_187590;Transcript_192644;Transcript_196215;Transcript_235625
GO:0008360	P:regulation_of_cell_shape	8	6.31869e-21	Transcript_033017;Transcript_041385;Transcript_061772;Transcript_149561;Transcript_155810;Transcript_194193;Transcript_230958;Transcript_236530
GO:0018105	P:peptidyl-serine_phosphorylation	8	1.13792e-18	Transcript_015977;Transcript_033017;Transcript_041385;Transcript_201137;Transcript_202384;Transcript_220376;Transcript_235878;Transcript_236530
GO:0006915	P:apoptotic_process	8	9.76487e-17	Transcript_006795;Transcript_037498;Transcript_040271;Transcript_101332;Transcript_114187;Transcript_138761;Transcript_195453;Transcript_229810
GO:0015986	P:ATP_synthesis_coupled_proton_transport	8	7.27194e-16	Transcript_006390;Transcript_023555;Transcript_026611;Transcript_040111;Transcript_043185;Transcript_045337;Transcript_201255;Transcript_205374
GO:0006606	P:protein_import_into_nucleus	8	2.02694e-15	Transcript_014649;Transcript_016204;Transcript_018940;Transcript_108981;Transcript_158395;Transcript_235418;Transcript_241108;Transcript_243146
GO:0006631	P:fatty_acid_metabolic_process	8	2.95436e-14	Transcript_018164;Transcript_026760;Transcript_036876;Transcript_150805;Transcript_223736;Transcript_233892;Transcript_239329;Transcript_239894
GO:0010218	P:response_to_far_red_light	8	8.89551e-13	Transcript_005179;Transcript_018416;Transcript_023102;Transcript_033045;Transcript_034660;Transcript_108837;Transcript_155928;Transcript_202542
GO:0010114	P:response_to_red_light	8	4.29278e-11	Transcript_005179;Transcript_018416;Transcript_024208;Transcript_034660;Transcript_096084;Transcript_108837;Transcript_155268;Transcript_155928
GO:0046854	P:phosphatidylinositol_phosphorylation	8	1.09416e-09	Transcript_008396;Transcript_019778;Transcript_088132;Transcript_157618;Transcript_185415;Transcript_192590;Transcript_222019;Transcript_234135
GO:0006366	P:transcription_from_RNA_polymerase_II_promoter	8	1.09416e-09	Transcript_002021;Transcript_054599;Transcript_093018;Transcript_150478;Transcript_159255;Transcript_177859;Transcript_180390;Transcript_187506
GO:0006730	P:one-carbon_metabolic_process	8	1.3977e-08	Transcript_006978;Transcript_028080;Transcript_030648;Transcript_042822;Transcript_159028;Transcript_222314;Transcript_227819;Transcript_237995
GO:0010584	P:pollen_exine_formation	8	1.80699e-07	Transcript_025189;Transcript_027303;Transcript_057799;Transcript_105933;Transcript_131936;Transcript_153953;Transcript_197038;Transcript_220227
GO:0006413	P:translational_initiation	8	1.80699e-07	Transcript_012262;Transcript_016560;Transcript_026774;Transcript_031558;Transcript_043594;Transcript_136358;Transcript_180586;Transcript_224747
GO:0022900	P:electron_transport_chain	8	2.86901e-06	Transcript_005630;Transcript_023779;Transcript_030330;Transcript_033063;Transcript_050536;Transcript_169480;Transcript_235200;Transcript_238422
GO:0009944	P:polarity_specification_of_adaxial/abaxial_axis	8	9.17691e-06	Transcript_023646;Transcript_042145;Transcript_043478;Transcript_092175;Transcript_155267;Transcript_227776;Transcript_238051;Transcript_240406
GO:0006909	P:phagocytosis	8	1.69134e-05	Transcript_012807;Transcript_015835;Transcript_026611;Transcript_033017;Transcript_043185;Transcript_156448;Transcript_210991;Transcript_238919
GO:0030154	P:cell_differentiation	7	2.05608e-59	Transcript_009121;Transcript_022100;Transcript_036202;Transcript_042145;Transcript_046257;Transcript_169244;Transcript_237581
GO:0006970	P:response_to_osmotic_stress	7	1.42373e-36	Transcript_023779;Transcript_090430;Transcript_155240;Transcript_179976;Transcript_192119;Transcript_227686;Transcript_229385
GO:0006486	P:protein_glycosylation	7	2.12379e-28	Transcript_001971;Transcript_004982;Transcript_021186;Transcript_034534;Transcript_180845;Transcript_227688;Transcript_229590
GO:0030244	P:cellulose_biosynthetic_process	7	2.48582e-23	Transcript_005015;Transcript_014494;Transcript_015198;Transcript_148491;Transcript_155240;Transcript_180358;Transcript_223233
GO:0006974	P:cellular_response_to_DNA_damage_stimulus	7	2.39534e-21	Transcript_022196;Transcript_042145;Transcript_108778;Transcript_196318;Transcript_226114;Transcript_233284;Transcript_236505
GO:0042744	P:hydrogen_peroxide_catabolic_process	7	1.00829e-17	Transcript_001865;Transcript_006334;Transcript_018511;Transcript_060152;Transcript_190763;Transcript_196627;Transcript_233284
GO:0007017	P:microtubule-based_process	7	3.47355e-15	Transcript_004764;Transcript_004842;Transcript_030679;Transcript_043075;Transcript_103380;Transcript_168236;Transcript_179927
GO:0009744	P:response_to_sucrose	7	9.82651e-15	Transcript_000211;Transcript_004493;Transcript_007763;Transcript_030348;Transcript_031338;Transcript_180358;Transcript_223119
GO:0051258	P:protein_polymerization	7	2.2602e-12	Transcript_004764;Transcript_004842;Transcript_030679;Transcript_043075;Transcript_103380;Transcript_168236;Transcript_179927
GO:0031348	P:negative_regulation_of_defense_response	7	8.04621e-12	Transcript_020324;Transcript_023102;Transcript_033045;Transcript_042206;Transcript_100502;Transcript_144160;Transcript_202542
GO:0010501	P:RNA_secondary_structure_unwinding	7	2.18508e-10	Transcript_012262;Transcript_020362;Transcript_043594;Transcript_167220;Transcript_191819;Transcript_224847;Transcript_232525
GO:0090502	P:RNA_phosphodiester_bond_hydrolysis,_endonucleolytic	7	4.08635e-09	Transcript_022100;Transcript_023948;Transcript_034582;Transcript_048008;Transcript_069789;Transcript_125733;Transcript_185145
GO:0006357	P:regulation_of_transcription_from_RNA_polymerase_II_promoter	7	4.08635e-09	Transcript_002021;Transcript_004649;Transcript_013734;Transcript_054599;Transcript_187506;Transcript_210991;Transcript_237558
GO:0008033	P:tRNA_processing	7	1.51734e-08	Transcript_013970;Transcript_016005;Transcript_018331;Transcript_041560;Transcript_113876;Transcript_205336;Transcript_207184
GO:0009765	P:photosynthesis,_light_harvesting	7	3.65299e-07	Transcript_005179;Transcript_018416;Transcript_038206;Transcript_145533;Transcript_152342;Transcript_155928;Transcript_201460
GO:0016310	P:phosphorylation	7	1.06055e-05	Transcript_034344;Transcript_072587;Transcript_172211;Transcript_202654;Transcript_222390;Transcript_227802;Transcript_228794
GO:2000024	P:regulation_of_leaf_development	7	1.43884e-05	Transcript_018802;Transcript_023646;Transcript_027836;Transcript_034176;Transcript_042145;Transcript_155267;Transcript_240406
GO:0009820	P:alkaloid_metabolic_process	7	6.64111e-05	Transcript_009692;Transcript_020455;Transcript_024085;Transcript_047156;Transcript_057859;Transcript_095937;Transcript_149653
GO:0006368	P:transcription_elongation_from_RNA_polymerase_II_promoter	7	0.00116438	Transcript_004649;Transcript_013734;Transcript_139660;Transcript_149744;Transcript_226584;Transcript_228720;Transcript_237558
GO:0080167	P:response_to_karrikin	6	1.04071e-24	Transcript_004493;Transcript_016420;Transcript_163988;Transcript_196954;Transcript_209211;Transcript_223119
GO:0051028	P:mRNA_transport	6	4.4899e-22	Transcript_048932;Transcript_118749;Transcript_128010;Transcript_180857;Transcript_199146;Transcript_208937
GO:0044281	P:small_molecule_metabolic_process	6	1.4794e-20	Transcript_018164;Transcript_120546;Transcript_180845;Transcript_209045;Transcript_228021;Transcript_232471
GO:0010228	P:vegetative_to_reproductive_phase_transition_of_meristem	6	8.32162e-20	Transcript_000361;Transcript_027836;Transcript_074557;Transcript_096084;Transcript_192119;Transcript_222390
GO:0009860	P:pollen_tube_growth	6	3.40825e-19	Transcript_009286;Transcript_034316;Transcript_036091;Transcript_155810;Transcript_239941;Transcript_242855
GO:0045087	P:innate_immune_response	6	9.88266e-19	Transcript_006795;Transcript_012987;Transcript_023301;Transcript_105842;Transcript_197004;Transcript_226817
GO:0006950	P:response_to_stress	6	1.11568e-17	Transcript_012241;Transcript_013042;Transcript_110097;Transcript_174640;Transcript_184756;Transcript_238387
GO:0000911	P:cytokinesis_by_cell_plate_formation	6	1.30298e-16	Transcript_009001;Transcript_011266;Transcript_018082;Transcript_175416;Transcript_199471;Transcript_243720
GO:0016036	P:cellular_response_to_phosphate_starvation	6	1.01361e-15	Transcript_016721;Transcript_025940;Transcript_028368;Transcript_172102;Transcript_215202;Transcript_239329
GO:0010467	P:gene_expression	6	1.09947e-15	Transcript_012987;Transcript_026774;Transcript_043594;Transcript_136358;Transcript_159255;Transcript_230984
GO:0042542	P:response_to_hydrogen_peroxide	6	1.43261e-15	Transcript_011264;Transcript_025598;Transcript_035390;Transcript_139661;Transcript_157859;Transcript_165034
GO:0043066	P:negative_regulation_of_apoptotic_process	6	2.0262e-15	Transcript_009517;Transcript_101332;Transcript_114187;Transcript_138761;Transcript_229810;Transcript_234175
GO:0009620	P:response_to_fungus	6	8.81397e-14	Transcript_042145;Transcript_061772;Transcript_125015;Transcript_145272;Transcript_192463;Transcript_230274
GO:0048316	P:seed_development	6	2.47023e-13	Transcript_000211;Transcript_002021;Transcript_007763;Transcript_153953;Transcript_188668;Transcript_218059
GO:0009739	P:response_to_gibberellin	6	6.96521e-13	Transcript_080059;Transcript_096297;Transcript_122101;Transcript_181429;Transcript_185779;Transcript_238051
GO:0030433	P:ER-associated_ubiquitin-dependent_protein_catabolic_process	6	1.39475e-12	Transcript_009034;Transcript_010111;Transcript_043014;Transcript_123857;Transcript_234735;Transcript_241708
GO:0045489	P:pectin_biosynthetic_process	6	1.97558e-12	Transcript_012883;Transcript_058380;Transcript_074927;Transcript_151634;Transcript_176239;Transcript_236296
GO:0022008	P:neurogenesis	6	3.69932e-12	Transcript_043468;Transcript_083204;Transcript_114187;Transcript_149814;Transcript_210991;Transcript_233806
GO:0010411	P:xyloglucan_metabolic_process	6	3.69932e-12	Transcript_004982;Transcript_025565;Transcript_152390;Transcript_234475;Transcript_238561;Transcript_243850
GO:0009816	P:defense_response_to_bacterium,_incompatible_interaction	6	1.02259e-11	Transcript_010355;Transcript_034582;Transcript_042206;Transcript_197004;Transcript_199534;Transcript_227686
GO:0051726	P:regulation_of_cell_cycle	6	2.02082e-11	Transcript_000211;Transcript_004649;Transcript_007763;Transcript_013734;Transcript_016237;Transcript_237558
GO:0008152	P:metabolic_process	6	2.84361e-11	Transcript_017874;Transcript_120726;Transcript_197209;Transcript_221871;Transcript_222192;Transcript_242732
GO:0006914	P:autophagy	6	2.84361e-11	Transcript_015783;Transcript_156448;Transcript_167228;Transcript_170081;Transcript_197462;Transcript_238103
GO:0006635	P:fatty_acid_beta-oxidation	6	4.00398e-11	Transcript_021257;Transcript_029830;Transcript_079374;Transcript_162000;Transcript_223630;Transcript_237552
GO:0010468	P:regulation_of_gene_expression	6	2.89654e-10	Transcript_012262;Transcript_040271;Transcript_043594;Transcript_044861;Transcript_191819;Transcript_237366
GO:0042546	P:cell_wall_biogenesis	6	2.89654e-10	Transcript_025565;Transcript_152390;Transcript_155240;Transcript_234475;Transcript_238561;Transcript_243850
GO:0044267	P:cellular_protein_metabolic_process	6	2.89654e-10	Transcript_022952;Transcript_026774;Transcript_043594;Transcript_136358;Transcript_137810;Transcript_230984
GO:0006284	P:base-excision_repair	6	5.65192e-09	Transcript_015798;Transcript_020776;Transcript_049632;Transcript_142487;Transcript_143674;Transcript_197824
GO:0009627	P:systemic_acquired_resistance	6	6.02697e-09	Transcript_019060;Transcript_042206;Transcript_090681;Transcript_147921;Transcript_212580;Transcript_227688
GO:0009664	P:plant-type_cell_wall_organization	6	7.84955e-09	Transcript_095767;Transcript_139328;Transcript_152343;Transcript_184760;Transcript_222950;Transcript_233499
GO:0034599	P:cellular_response_to_oxidative_stress	6	1.09084e-08	Transcript_014604;Transcript_025797;Transcript_027279;Transcript_037644;Transcript_156926;Transcript_206711
GO:0032508	P:DNA_duplex_unwinding	6	2.93807e-08	Transcript_013970;Transcript_023060;Transcript_041712;Transcript_071405;Transcript_090284;Transcript_155807
GO:0016485	P:protein_processing	6	4.09255e-08	Transcript_022952;Transcript_039672;Transcript_156977;Transcript_158348;Transcript_158550;Transcript_242959
GO:0006289	P:nucleotide-excision_repair	6	7.95319e-08	Transcript_015798;Transcript_021735;Transcript_037500;Transcript_142487;Transcript_165796;Transcript_197824
GO:0042147	P:retrograde_transport,_endosome_to_Golgi	6	1.1095e-07	Transcript_015116;Transcript_016567;Transcript_039015;Transcript_044539;Transcript_161644;Transcript_206246
GO:0010087	P:phloem_or_xylem_histogenesis	6	2.77797e-07	Transcript_019743;Transcript_061518;Transcript_149776;Transcript_182308;Transcript_218673;Transcript_243850
GO:0009644	P:response_to_high_light_intensity	6	5.30709e-07	Transcript_025598;Transcript_042062;Transcript_139661;Transcript_202071;Transcript_204443;Transcript_225582
GO:0015693	P:magnesium_ion_transport	6	9.03425e-06	Transcript_035629;Transcript_081763;Transcript_095467;Transcript_198098;Transcript_233014;Transcript_234293
GO:0000160	P:phosphorelay_signal_transduction_system	6	4.40608e-05	Transcript_017450;Transcript_020405;Transcript_039721;Transcript_196770;Transcript_226660;Transcript_228794
GO:0010105	P:negative_regulation_of_ethylene-activated_signaling_pathway	6	0.000193368	Transcript_020405;Transcript_028368;Transcript_042206;Transcript_156818;Transcript_196770;Transcript_226660
GO:0043086	P:negative_regulation_of_catalytic_activity	6	0.00150151	Transcript_014604;Transcript_046257;Transcript_152339;Transcript_186722;Transcript_208901;Transcript_229938
GO:0000082	P:G1/S_transition_of_mitotic_cell_cycle	6	0.0026054	Transcript_000211;Transcript_007763;Transcript_015798;Transcript_036736;Transcript_040271;Transcript_142487
GO:0009308	P:amine_metabolic_process	6	0.00270427	Transcript_007347;Transcript_106270;Transcript_158955;Transcript_177859;Transcript_197557;Transcript_222613
GO:0045292	P:mRNA_cis_splicing,_via_spliceosome	6	0.00270427	Transcript_009745;Transcript_028952;Transcript_042932;Transcript_147408;Transcript_172886;Transcript_182308
GO:0006807	P:nitrogen_compound_metabolic_process	6	0.0140945	Transcript_018842;Transcript_034831;Transcript_082227;Transcript_187768;Transcript_240152;Transcript_243134
GO:0009625	P:response_to_insect	6	0.265148	Transcript_023102;Transcript_031557;Transcript_033045;Transcript_042206;Transcript_181429;Transcript_202542
GO:0009813	P:flavonoid_biosynthetic_process	5	4.35508e-30	Transcript_017321;Transcript_026411;Transcript_091774;Transcript_144277;Transcript_232480
GO:0009826	P:unidimensional_cell_growth	5	8.34194e-27	Transcript_018082;Transcript_036091;Transcript_074557;Transcript_139328;Transcript_234088
GO:0006887	P:exocytosis	5	1.54814e-25	Transcript_018082;Transcript_018740;Transcript_071779;Transcript_189744;Transcript_234643
[truncated: 548 more rows]
