# Supplementary material for: Characterization of Transcriptome Dynamics during Early Fruit Development in Olive (Olea europaea L.)
Source: Int J Mol Sci. 2023 Jan 4;24(2):961. doi: 10.3390/ijms24020961 (PMC9864153; doi:10.3390/ijms24020961)
Supplement: Supplementary file 1 [file ijms-24-00961-s001.zip › Table S13_.xlsx]

## Sheet: P14 vs. P0_UP
Supplementary Table S13
P14 vs. P0_UP
Genes	log2FoldChange	FoldChange	p value	Gene_ID	Description
LOC111374859	6.04837	66.1822	8.86e-26	XP_022853377.1	MYB3R-1 transcription factor MYB3R-1-like=Olea europaea var. sylvestris
LOC111409023	5.77258	54.6663	4.34e-154	XP_022894685.1	CYCD3;1cyclin-D3-1-like=Olea europaea var. sylvestris
LOC111372156	4.47924	22.3042	1.22e-17	XP_022850120.1	CYCD6;1 cyclin-D6-1, transcript variant X2=Olea europaea var. sylvestris
LOC111413007	3.44397	10.8827	5.55e-15	XP_022899656.1	cyclin S13-7 G2/mitotic-specific cyclin S13-7-like=Olea europaea var. sylvestris
LOC111379297	3.40774	10.6129	5.19e-23	XP_022858425.1	cyclin-2 G2/mitotic-specific cyclin-2-like, transcript variant X3=Olea europaea var. sylvestris
LOC111398716	3.32476	10.0196	6.21e-27	XP_022881536.1	CYCA2;1 cyclin-A2-1-like=Olea europaea var. sylvestris
LOC111378817	3.2053	9.22341	1.46e-38	XP_022857856.1	CYCD3;1 cyclin-D3-1-like=Olea europaea var. sylvestris
LOC111383417	3.18473	9.09284	1.98e-24	XP_022863293.1	cyclin-2 G2/mitotic-specific cyclin-2-like=Olea europaea var. sylvestris
LOC111409342	2.94118	7.68038	9.25e-20	XP_022895161.1	CYCB2;3 cyclin-B2-3-like, transcript variant X2=Olea europaea var. sylvestris
LOC111385349	2.7992	6.96053	5.44e-10	XP_022865500.1	SMR6 cyclin-dependent protein kinase inhibitor SMR6-like=Olea europaea var. sylvestris
LOC111380900	2.76218	6.78421	1.2e-55	XP_022860331.1	SCL6 scarecrow-like protein 6, transcript variant X2=Olea europaea var. sylvestris
LOC111382893	2.75656	6.75785	3.53e-09	XP_022862696.1	SMR6 cyclin-dependent protein kinase inhibitor SMR6-like=Olea europaea var. sylvestris
LOC111389737	2.71291	6.55642	2.5e-13	XP_022870456.1	CYCD6;1 cyclin-D6-1=Olea europaea var. sylvestris
LOC111368834	2.67208	6.37347	1.12e-42	XP_022846070.1	SCL28 scarecrow-like protein 28=Olea europaea var. sylvestris
LOC111381523	2.64055	6.23567	8.98e-12	XP_022861077.1	MYB3R-4 transcription factor MYB3R-4-like=Olea europaea var. sylvestris
LOC111394360	2.56986	5.93751	9.64e-33	XP_022875899.1	CYCA1;4 cyclin-A1-4-like=Olea europaea var. sylvestris
LOC111396137	2.49006	5.61802	2.13e-12	XP_022878218.1	CYCD1;1 cyclin-D1-1-like=Olea europaea var. sylvestris
LOC111387421	2.45698	5.49067	2.87e-27	XP_022867743.1	cyclin-1 G2/mitotic-specific cyclin-1-like=Olea europaea var. sylvestris
LOC111388187	2.44771	5.45549	8.61e-16	XP_022868640.1	CYCD3;1 cyclin-D3-1-like=Olea europaea var. sylvestris
LOC111400590	2.43904	5.42282	6.14e-37	XP_022883766.1	cyclin S13-7 G2/mitotic-specific cyclin S13-7-like=Olea europaea var. sylvestris
LOC111407526	2.3175	4.98467	1.78e-19	XP_022892830.1	SCL28 scarecrow-like protein 28=Olea europaea var. sylvestris
LOC111401639	2.18124	4.53544	1.19e-17	XP_022885233.1	E2FE transcription factor-like E2FE=Olea europaea var. sylvestris
LOC111381105	2.11489	4.33156	1.41e-06	XP_022860599.1	CYCA3;1 cyclin-A3-1-like=Olea europaea var. sylvestris
LOC111375324	2.10857	4.31265	7.31e-29	XP_022853898.1	cyclin S13-7 G2/mitotic-specific cyclin S13-7-like, transcript variant X2=Olea europaea var. sylvestris
LOC111368142	2.10659	4.30671	2.83e-12	XP_022845140.1	E2FE transcription factor-like E2FE=Olea europaea var. sylvestris
LOC111397535	2.05731	4.1621	3.84e-16	XP_022880286.1	CYCB2;3 cyclin-B2-3-like=Olea europaea var. sylvestris
LOC111387967	1.97544	3.93249	1.65e-31	XP_022868378.1	SCL6 scarecrow-like protein 6=Olea europaea var. sylvestris
LOC111365450	1.94589	3.85274	6.26e-16	XP_022841766.1	SCL4 scarecrow-like protein 4=Olea europaea var. sylvestris
LOC111374856	1.88901	3.70382	9.16e-16	XP_022853374.1	MYB3R-1 transcription factor MYB3R-1-like, transcript variant X4=Olea europaea var. sylvestris
LOC111387106	1.83175	3.55968	8.22e-18	XP_022867393.1	CYCA1;4 cyclin-A1-4-like=Olea europaea var. sylvestris
LOC111381297	1.82172	3.53501	2.59e-22	XP_022860837.1	CDKB;1 cyclin-dependent kinase B1-1=Olea europaea var. sylvestris
LOC111390525	1.76696	3.40336	6.46e-11	XP_022871347.1	CYCD4;2 cyclin-D4-2-like=Olea europaea var. sylvestris
LOC111398618	1.75487	3.37495	2.24e-16	XP_022881380.1	CYCB2;4 cyclin-B2-4-like, transcript variant X4=Olea europaea var. sylvestris
LOC111401995	1.68889	3.22408	2.82e-14	XP_022885770.1	CYCD3;3 cyclin-D3-3-like, transcript variant X2=Olea europaea var. sylvestris
LOC111380714	1.65724	3.15412	3.51e-12	XP_022860117.1	CYCD5;1 cyclin-D5-1-like=Olea europaea var. sylvestris
LOC111395860	1.61184	3.05642	7.72e-09	XP_022877828.1	CYCB3;1 cyclin-B3-1=Olea europaea var. sylvestris
LOC111376836	1.59064	3.01183	5.95e-07	XP_022855600.1	CYCD5;1 cyclin-D5-1-like=Olea europaea var. sylvestris
LOC111373586	1.56467	2.9581	7.03e-05	XP_022851907.1	CKI3 cyclin-dependent kinase inhibitor 3-like=Olea europaea var. sylvestris
LOC111397931	1.23691	2.35693	9.88e-09	XP_022880663.1	CDKC;1 cyclin-dependent kinase C-1-like=Olea europaea var. sylvestris
LOC111368503	1.18687	2.27658	1.62e-05	XP_022845538.1	CYCU1;1 cyclin-U1-1-like=Olea europaea var. sylvestris
LOC111376211	1.17103	2.25172	1.08e-11	XP_022854929.1	MYB3R-1 transcription factor MYB3R-1-like, transcript variant X2=Olea europaea var. sylvestris
LOC111365512	1.11726	2.16935	0.000362873	XP_022841835.1	E2FA transcription factor E2FA-like=Olea europaea var. sylvestris
LOC111411897	1.11171	2.16102	2.23e-06	XP_022898321.1	SCL3 scarecrow-like protein 3=Olea europaea var. sylvestris
LOC111404452	1.10117	2.14528	1.62e-10	XP_022889026.1	RBR3-like cell wall protein RBR3-like=Olea europaea var. sylvestris
LOC111378780	1.07362	2.10471	0.00052421	XP_022857787.1	E2FA transcription factor E2FA-like, transcript variant X5=Olea europaea var. sylvestris
LOC111392136	0.979411	1.97166	4.3e-06	XP_022873165.1	CYCA3;1 cyclin-A3-1=Olea europaea var. sylvestris
LOC111381566	0.646816	1.56571	0.0226899	XP_022861127.1	CYCD6;1 cyclin-D6-1=Olea europaea var. sylvestris
LOC111391530	0.61575	1.53235	0.000623348	XP_022872530.1	SCL21 scarecrow-like protein 21, transcript variant X3=Olea europaea var. sylvestris
LOC111381677	0.599358	1.51504	0.000184312	XP_022861258.1	CYCL1;1 cyclin-L1-1-like, transcript variant X9=Olea europaea var. sylvestris
LOC111373799	0.592906	1.50828	1.66e-05	XP_022852131.1	SCL22 scarecrow-like protein 22, transcript variant X2=Olea europaea var. sylvestris
LOC111410139	0.590042	1.50529	0.0228751	XP_022896126.1	CYCD3;1 cyclin-D3-1-like=Olea europaea var. sylvestris
LOC111370390	0.562922	1.47726	0.000414886	XP_022847840.1	SCL23 scarecrow-like protein 23=Olea europaea var. sylvestris
LOC111367209	0.541832	1.45582	0.00200375	XP_022843732.1	CYCD3;3 cyclin-D3-3-like=Olea europaea var. sylvestris
LOC111389206	0.420317	1.33822	0.021008	XP_022869865.1	SCL4 scarecrow-like protein 4=Olea europaea var. sylvestris
LOC111412542	4.86984	29.2394	2.18e-16	XP_022899245.1	SMR9 cyclin-dependent protein kinase inhibitor SMR9-like=Olea europaea var. sylvestris

## Sheet: P14 vs. P0_DOWN
P14 vs. P0_DOWN
Genes	log2FoldChange	FoldChange	p value	Gene_ID	Description
LOC111383345	-5.42261	-42.8912	5.42e-57	XP_022863230.1	CYCU4;1 cyclin-U4-1-like, transcript variant X3=Olea europaea var. sylvestris
LOC111393529	-4.6036	-24.3121	2.31e-69	XP_022874865.1	SCL14 scarecrow-like protein 14=Olea europaea var. sylvestris
LOC111411586	-4.17691	-18.0873	6.73e-17	XP_022897859.1	CKI7 X2 cyclin-dependent kinase inhibitor 7-like, transcript variant X2=Olea europaea var. sylvestris
LOC111410601	-3.6734	-12.7586	1.41e-34	XP_022896795.1	CKI7 X2 cyclin-dependent kinase inhibitor 7-like, transcript variant X2=Olea europaea var. sylvestris
LOC111410267	-3.51863	-11.4608	4.26e-22	XP_022896307.1	CYCU4;1 cyclin-U4-1-like=Olea europaea var. sylvestris
LOC111381245	-2.3775	-5.19634	1.43e-28	XP_022860768.1	SCL3 scarecrow-like protein 3, transcript variant X2=Olea europaea var. sylvestris
LOC111390501	-2.14179	-4.41309	1.92e-34	XP_022871314.1	CYCT1;3 cyclin-T1-3-like=Olea europaea var. sylvestris
LOC111409888	-1.95737	-3.88353	2.07e-52	XP_022895752.1	SCL6 scarecrow-like protein 6, transcript variant X2=Olea europaea var. sylvestris
LOC111391983	-1.93933	-3.83527	1.04e-06	XP_022873042.1	SCL3 scarecrow-like protein 3, transcript variant X2=Olea europaea var. sylvestris
LOC111393263	-1.89447	-3.71786	6.39e-60	XP_022874491.1	SCL8 scarecrow-like protein 8, transcript variant X2=Olea europaea var. sylvestris
LOC111403941	-1.87972	-3.68005	1.1e-10	XP_022888392.1	SCL21 scarecrow-like protein 21=Olea europaea var. sylvestris
LOC111378462	-1.60935	-3.05115	6.13e-15	XP_022857427.1	CYCU4;1 cyclin-U4-1-like=Olea europaea var. sylvestris
LOC111408955	-1.60385	-3.03954	1.68e-18	XP_022894579.1	CYCT1;3 cyclin-T1-3-like, transcript variant X3=Olea europaea var. sylvestris
LOC111374402	-1.58547	-3.00106	3.67e-21	XP_022852839.1	CKI4 cyclin-dependent kinase inhibitor 4-like=Olea europaea var. sylvestris
LOC111395674	-1.52191	-2.87171	7.16e-39	XP_022877549.1	SCL21 scarecrow-like protein 21=Olea europaea var. sylvestris
LOC111367864	-1.44979	-2.73169	6.06e-22	XP_022844706.1	CKI7 cyclin-dependent kinase inhibitor 7-like=Olea europaea var. sylvestris
LOC111407903	-1.41034	-2.65799	1.86e-24	XP_022893380.1	CDKF;1 cyclin-dependent kinase F-1=Olea europaea var. sylvestris
LOC111395898	-1.29478	-2.45339	1.74e-30	XP_022877882.1	SCL13 scarecrow-like protein 13, transcript variant X2=Olea europaea var. sylvestris
LOC111377566	-1.20899	-2.31176	7.55e-11	XP_022856462.1	SCL3 scarecrow-like protein 3=Olea europaea var. sylvestris
LOC111401867	-1.15012	-2.21933	2.75e-24	XP_022885594.1	CDKG;2 X3 cyclin-dependent kinase G-2-like, transcript variant X3=Olea europaea var. sylvestris
LOC111387356	-1.09754	-2.1399	1.77e-08	XP_022867679.1	CDKF;4 cyclin-dependent kinase F-4=Olea europaea var. sylvestris
LOC111376230	-1.06247	-2.0885	2.84e-06	XP_022854951.1	CYCD1;1 cyclin-D1-1-like=Olea europaea var. sylvestris
LOC111380541	-0.963753	-1.95038	7.22e-07	XP_022859897.1	CYCL1;1 cyclin-L1-1-like, transcript variant X5=Olea europaea var. sylvestris
LOC111410342	-0.926341	-1.90045	1.75e-06	XP_022896390.1	CKI7 X2 cyclin-dependent kinase inhibitor 7-like, transcript variant X2=Olea europaea var. sylvestris
LOC111385820	-0.778537	-1.71539	0.00189796	XP_022866013.1	CYCU4;1 cyclin-U4-1-like=Olea europaea var. sylvestris
LOC111369301	-0.777663	-1.71435	5.54e-07	XP_022846530.1	CDKG;2 X3 cyclin-dependent kinase G-2-like, transcript variant X3=Olea europaea var. sylvestris
LOC111409194	-0.757088	-1.69008	2.48e-06	XP_022894949.1	CYCB1;2 cyclin-B1-2-like=Olea europaea var. sylvestris
LOC111379178	-0.740875	-1.67119	3.05e-06	XP_022858287.1	SCL15 scarecrow-like protein 15=Olea europaea var. sylvestris
LOC111401071	-0.708222	-1.63379	4.33e-05	XP_022884381.1	SCL15 scarecrow-like protein 15=Olea europaea var. sylvestris
LOC111403429	-0.682859	-1.60532	7.49e-06	XP_022887697.1	CDKC;2 cyclin-dependent kinase C-2-like=Olea europaea var. sylvestris
LOC111408509	-0.654624	-1.57421	0.00243479	XP_022894024.1	CYCL1;1 cyclin-L1-1-like=Olea europaea var. sylvestris
LOC111406285	-0.638949	-1.55719	1.83e-08	XP_022891400.1	CDKG;2 X8 cyclin-dependent kinase G-2-like, transcript variant X8=Olea europaea var. sylvestris
LOC111399724	-0.629241	-1.54675	0.00757612	XP_022882955.1	MYB3R-5 transcription factor MYB3R-5-like transcript variant X2=Olea europaea var. sylvestris
LOC111374749	-0.626187	-1.54348	0.000325848	XP_022853254.1	MYB3R-5 transcription factor MYB3R-5-like=Olea europaea var. sylvestris
LOC111389861	-0.608925	-1.52512	4.16e-05	XP_022870605.1	SCL15 scarecrow-like protein 15=Olea europaea var. sylvestris
LOC111402001	-0.59967	-1.51537	0.00016155	XP_022885787.1	CYCP3;1 cyclin-P3-1-like=Olea europaea var. sylvestris
LOC111385852	-0.576506	-1.49123	3.83e-06	XP_022866049.1	CYCT1;5 cyclin-T1-5-like=Olea europaea var. sylvestris
LOC111396796	-0.550519	-1.46461	0.000300934	XP_022879084.1	SCL1 scarecrow-like protein 1, transcript variant X4=Olea europaea var. sylvestris
LOC111367616	-0.548019	-1.46208	0.00100875	XP_022844355.1	SCL4 scarecrow-like protein 4=Olea europaea var. sylvestris
LOC111371348	-0.524326	-1.43826	0.00671104	XP_022849040.1	CKI3 X2 cyclin-dependent kinase inhibitor 3-like, transcript variant X2=Olea europaea var. sylvestris
LOC111412051	-0.516225	-1.43021	0.000590733	XP_022898562.1	PAT1 scarecrow-like transcription factor PAT1, transcript variant X3=Olea europaea var. sylvestris
LOC111388925	-0.501021	-1.41521	0.00752113	XP_022869522.1	MYB3R-3 transcription factor MYB3R-3-like=Olea europaea var. sylvestris
LOC111408732	-0.500615	-1.41482	5.77e-06	XP_022894259.1	SCL1 scarecrow-like protein 1=Olea europaea var. sylvestris
LOC111393407	-0.492379	-1.40676	0.00223053	XP_022874693.1	CYCC1;2 cyclin-C1-2-like, transcript variant X2=Olea europaea var. sylvestris
LOC111407544	-0.356827	-1.28061	0.0010308	XP_022892874.1	SCL14 scarecrow-like protein 14, transcript variant X3=Olea europaea var. sylvestris
LOC111369670	-0.324514	-1.25224	0.0156514	XP_022847042.1	SCL30 scarecrow-like protein 30=Olea europaea var. sylvestris

## Sheet: P28 vs. P14_UP
P28 vs. P14_UP
Genes	log2FoldChange	FoldChange	p value	Gene_ID	Description
LOC111410601	2.88762	7.4005	2.69504e-18	XP_022896795.1	CKI7 X2 cyclin-dependent kinase inhibitor 7-like, transcript variant X2=Olea europaea var. sylvestris
LOC111372156	1.41702	2.67034	2.25242e-09	XP_022850120.1	CYCD6;1 cyclin-D6-1, transcript variant X2=Olea europaea var. sylvestris
LOC111378814	1.37802	2.59911	4.39087e-08	XP_022857853.1	CYCD3;1 cyclin-D3-1-like=Olea europaea var. sylvestris
LOC111393406	1.16472	2.2419	0.00110617	XP_022874690.1	CYCC1;1 cyclin-C1-1-like=Olea europaea var. sylvestris
LOC111375947	1.08851	2.12654	0.0012766	XP_022854637.1	SCL9 scarecrow-like protein 9=Olea europaea var. sylvestris
LOC111389627	0.995668	1.994	0.00121378	XP_022870326.1	CYCU2;1 cyclin-U2-1-like=Olea europaea var. sylvestris
LOC111387106	0.970238	1.95916	2.81243e-07	XP_022867393.1	CYCA1;4 cyclin-A1-4-like=Olea europaea var. sylvestris
LOC111393407	0.955667	1.93948	2.98056e-08	XP_022874693.1	CYCC1;2 cyclin-C1-2-like, transcript variant X2=Olea europaea var. sylvestris
LOC111374859	0.913615	1.88376	6.31531e-05	XP_022853377.1	MYB3R-1 transcription factor MYB3R-1-like=Olea europaea var. sylvestris
LOC111397535	0.886455	1.84863	0.00127162	XP_022880286.1	CYCB2;3 cyclin-B2-3-like=Olea europaea var. sylvestris
LOC111367504	0.881738	1.84259	0.00462234	XP_022844184.1	CYCD4;1 cyclin-D4-1-like=Olea europaea var. sylvestris
LOC111394360	0.853772	1.80722	1.74463e-05	XP_022875899.1	CYCA1;4 cyclin-A1-4-like=Olea europaea var. sylvestris
LOC111412542	0.847496	1.79937	0.00181405	XP_022899245.1	SMR9 cyclin-dependent protein kinase inhibitor SMR9-like=Olea europaea var. sylvestris
LOC111398618	0.812512	1.75627	5.96779e-08	XP_022881380.1	CYCB2;4 cyclin-B2-4-like, transcript variant X4=Olea europaea var. sylvestris
LOC111389737	0.758529	1.69176	0.000486705	XP_022870456.1	CYCD6;1 cyclin-D6-1=Olea europaea var. sylvestris
LOC111409342	0.687669	1.61068	0.000593258	XP_022895161.1	CYCB2;3 cyclin-B2-3-like, transcript variant X2=Olea europaea var. sylvestris
LOC111383417	0.678756	1.60076	0.000608178	XP_022863293.1	cyclin-2 G2/mitotic-specific cyclin-2-like=Olea europaea var. sylvestris
LOC111381297	0.658374	1.5783	0.000225804	XP_022860837.1	CDKB;1 cyclin-dependent kinase B1-1=Olea europaea var. sylvestris
LOC111378817	0.656596	1.57636	0.00505332	XP_022857856.1	CYCD3;1 cyclin-D3-1-like=Olea europaea var. sylvestris
LOC111401639	0.648748	1.56781	0.000267717	XP_022885233.1	E2FE transcription factor-like E2FE=Olea europaea var. sylvestris
LOC111365450	0.625352	1.54259	0.000526571	XP_022841766.1	SCL4 scarecrow-like protein 4=Olea europaea var. sylvestris
LOC111368850	0.609255	1.52547	0.00226086	XP_022846093.1	CYCD3;3 cyclin-D3-3-like=Olea europaea var. sylvestris
LOC111380714	0.592264	1.50761	0.00322828	XP_022860117.1	CYCD5;1 cyclin-D5-1-like=Olea europaea var. sylvestris
LOC111381566	0.55774	1.47196	0.00335659	XP_022861127.1	CYCD6;1 cyclin-D6-1=Olea europaea var. sylvestris
LOC111379297	0.533283	1.44722	0.00891495	XP_022858425.1	cyclin-2 G2/mitotic-specific cyclin-2-like, transcript variant X3=Olea europaea var. sylvestris
LOC111396137	0.50666	1.42076	0.00746107	XP_022878218.1	CYCD1;1 cyclin-D1-1-like=Olea europaea var. sylvestris
LOC111380541	0.498809	1.41305	0.0043454	XP_022859897.1	CYCL1;1 cyclin-L1-1-like, transcript variant X5=Olea europaea var. sylvestris
LOC111368834	0.469945	1.38506	0.000836377	XP_022846070.1	SCL28 scarecrow-like protein 28=Olea europaea var. sylvestris
LOC111385600	0.464907	1.38023	0.0091206	XP_022865775.1	RBRA probable E3 ubiquitin-protein ligase rbrA=Olea europaea var. sylvestris

## Sheet: P28 vs. P14_DOWN
P28 vs. P14_DOWN
Genes	log2FoldChange	FoldChange	p value	Gene_ID	Description
LOC111401071	-2.36391	-5.14762	1.88138e-25	XP_022884381.1	SCL15 scarecrow-like protein 15=Olea europaea var. sylvestris
LOC111379178	-2.12749	-4.36957	3.85987e-21	XP_022858287.1	SCL15 scarecrow-like protein 15=Olea europaea var. sylvestris
LOC111381245	-2.00353	-4.00979	7.6972e-07	XP_022860768.1	SCL3 scarecrow-like protein 3, transcript_variant X2=Olea europaea var. sylvestris
LOC111411897	-1.80324	-3.49003	1.58331e-14	XP_022898321.1	SCL3 scarecrow-like protein 3=Olea europaea var. sylvestris
LOC111365512	-1.53745	-2.90282	1.29167e-07	XP_022841835.1	E2FA transcription factor E2FA-like=Olea europaea var. sylvestris
LOC111410139	-1.50628	-2.84077	1.65267e-07	XP_022896126.1	CYCD3;1 cyclin-D3-1-like=Olea europaea var. sylvestris
LOC111393263	-1.29879	-2.46023	3.82049e-13	XP_022874491.1	SCL8 scarecrow-like protein 8, transcript variant X2=Olea europaea var. sylvestris
LOC111412051	-1.28455	-2.43605	3.49463e-15	XP_022898562.1	PAT1 scarecrow-like transcription factor PAT1, transcript variant X3=Olea europaea var. sylvestris
LOC111369660	-0.930676	-1.90617	3.30135e-10	XP_022847027.1	SCL33 scarecrow-like protein 33=Olea europaea var. sylvestris
LOC111369670	-0.894883	-1.85946	2.99016e-08	XP_022847042.1	SCL30 scarecrow-like protein 30=Olea europaea var. sylvestris
LOC111409888	-0.847478	-1.79935	0.00171284	XP_022895752.1	SCL6 scarecrow-like protein 6, transcript variant X2=Olea europaea var. sylvestris
LOC111397931	-0.812624	-1.7564	0.000164532	XP_022880663.1	CDKC;1 cyclin-dependent kinase C-1-like=Olea europaea var. sylvestris
LOC111410841	-0.746919	-1.6782	0.00189192	XP_022897183.1	SCL6 scarecrow-like protein 6=Olea europaea var. sylvestris
LOC111385124	-0.739125	-1.66916	0.00199457	XP_022865268.1	SCL9 scarecrow-like protein 9, transcript variant X4=Olea europaea var. sylvestris
LOC111396796	-0.736734	-1.6664	6.44923e-07	XP_022879084.1	SCL1 scarecrow-like protein 1, transcript variant X4=Olea europaea var. sylvestris
LOC111367864	-0.725241	-1.65318	0.000157563	XP_022844706.1	CKI7 cyclin-dependent kinase inhibitor 7-like=Olea europaea var. sylvestris
LOC111387241	-0.677697	-1.59958	0.00451169	XP_022867562.1	SCL27 scarecrow-like protein 27, transcript variant X2=Olea europaea var. sylvestris
LOC111406004	-0.669315	-1.59032	0.000135298	XP_022890935.1	SCL14 scarecrow-like protein 14, transcript variant X3=Olea europaea var. sylvestris
LOC111371348	-0.665207	-1.5858	0.0017432	XP_022849040.1	CKI3 X2 cyclin-dependent kinase inhibitor 3-like, transcript variant X2=Olea europaea var. sylvestris
LOC111374402	-0.649098	-1.56819	0.000709268	XP_022852839.1	CKI4 cyclin-dependent kinase inhibitor 4-like=Olea europaea var. sylvestris
LOC111408732	-0.589869	-1.50511	1.03631e-05	XP_022894259.1	SCL1 scarecrow-like protein 1=Olea europaea var. sylvestris
LOC111373799	-0.540585	-1.45456	0.000973136	XP_022852131.1	SCL22 scarecrow-like protein 22, transcript_variant X2=Olea europaea var. sylvestris
LOC111389861	-0.495138	-1.40946	0.0108679	XP_022870605.1	SCL15 scarecrow-like protein 15=Olea europaea var. sylvestris
LOC111395674	-0.48973	-1.40418	0.00124431	XP_022877549.1	SCL21 scarecrow-like protein 21=Olea europaea var. sylvestris
LOC111407544	-0.410513	-1.32916	0.00229879	XP_022892874.1	SCL14 scarecrow-like protein 14, transcript variant X3=Olea europaea var. sylvestris
