# Supplementary material for: Characterization of Transcriptome Dynamics during Early Fruit Development in Olive (Olea europaea L.)
Source: Int J Mol Sci. 2023 Jan 4;24(2):961. doi: 10.3390/ijms24020961 (PMC9864153; doi:10.3390/ijms24020961)
Supplement: Supplementary file 1 [file ijms-24-00961-s001.zip › Table S14_.xlsx]

## Sheet: Table S14
Table S14
AUXIN
P14 vs. P0_UP
Genes	log2FoldChange	FoldChange	pvalue	Gene_ID	Description
LOC111411837	1.13604	2.19776	0.000190924	XP_022898235.1	TSA tryptophan synthase alpha chain-like=Olea europaea var. sylvestris
LOC111389323	1.68825	3.22266	4.96e-21	XP_022870014.1	TSB tryptophan synthase beta chain uncharacterized LOC111389323=Olea europaea var. sylvestris
LOC111404721	0.932867	1.90907	9.6e-07	XP_022889255.1	TSB tryptophan synthase beta chain uncharacterized LOC111404721=Olea europaea var. sylvestris
LOC111372240	3.85437	14.4637	7.32e-33	XP_022850243.1	TAR4 tryptophan aminotransferase-related protein 4-like=Olea europaea var. sylvestris
LOC111373056	0.788396	1.72715	0.00140615	XP_022851294.1	TAR4 tryptophan aminotransferase-related protein 4-like=Olea europaea var. sylvestris
LOC111387700	1.19446	2.2886	2.89e-05	XP_022868051.1	PIL3 X3 protein PIN-LIKES 3-like, transcript variant X3=Olea europaea var. sylvestris
LOC111402155	0.866248	1.82292	2.6e-06	XP_022886082.1	PIN1 auxin efflux carrier component 1-like=Olea europaea var. sylvestris
LOC111365275	0.763143	1.69718	9.13e-09	XP_022841487.1	PIN1 X2 auxin efflux carrier component 1-like, transcript variant X2=Olea europaea var. sylvestris
LOC111373998	0.646801	1.56569	6.35e-05	XP_022852367.1	PIN1B auxin efflux carrier component 1b=Olea europaea var. sylvestris
LOC111409368	1.21907	2.32797	3.02e-06	XP_022895191.1	PIN6 auxin efflux carrier component 6=Olea europaea var. sylvestris
LOC111395225	0.37307	1.29511	0.0146282	XP_022876988.1	PIN7 auxin efflux carrier component 7-like=Olea europaea var. sylvestris
LOC111399043	0.649897	1.56906	3.67e-07	XP_022882020.1	PIN7 auxin efflux carrier component 7-like=Olea europaea var. sylvestris
LOC111406943	4.27652	19.3803	4.62e-13	XP_022892064.1	PIN5 auxin efflux carrier component 5-like=Olea europaea var. sylvestris
LOC111380268	0.356305	1.28014	0.00961132	XP_022859549.1	LAX2 auxin transporter-like protein 2=Olea europaea var. sylvestris
LOC111392494	3.5405	11.6358	1.76e-38	XP_022873616.1	LAX2 auxin transporter-like protein 2=Olea europaea var. sylvestris
LOC111403236	1.59351	3.01783	1.54e-22	XP_022887436.1	LAX4 X5 auxin transporter-like protein 4, transcript variant X5=Olea europaea var. sylvestris
LOC111374882	5.26564	38.4694	2.14e-55	XP_022853409.1	LAX5 auxin transporter-like protein 5=Olea europaea var. sylvestris
LOC111368599	2.41611	5.33729	4.36e-68	XP_022845709.1	GH3.10 indole-3-acetic acid-amido synthetase GH3.10, transcript variant X2=Olea europaea var. sylvestris
LOC111397432	0.914297	1.88465	3.03e-12	XP_022880124.1	GH3.6 indole-3-acetic acid-amido synthetase GH3.6=Olea europaea var. sylvestris
LOC111379390	0.900418	1.86661	1.93e-06	XP_022858515.1	GH3.6 indole-3-acetic acid-amido synthetase GH3.6-like=Olea europaea var. sylvestris
LOC111395681	3.77347	13.675	7e-42	XP_022877558.1	GH3.6 indole-3-acetic acid-amido synthetase GH3.6-like=Olea europaea var. sylvestris
LOC111412397	1.04278	2.0602	7.64e-09	XP_022899083.1	GH3.9 indole-3-acetic acid-amido synthetase GH3.9=Olea europaea var. sylvestris
LOC111388848	0.522246	1.43619	0.0122486	XP_022869430.1	ILR1 1 IAA-amino acid hydrolase ILR1-like 1=Olea europaea var. sylvestris
LOC111403979	0.542843	1.45684	0.00101045	XP_022888443.1	ILR1 3 IAA-amino acid hydrolase ILR1-like 3=Olea europaea var. sylvestris
LOC111367744	0.568794	1.48328	0.000128681	XP_022844546.1	ILR1 5 IAA-amino acid hydrolase ILR1-like 5, transcript variant X2=Olea europaea var. sylvestris
LOC111412738	0.256682	1.19473	0.0187208	XP_022899424.1	TIR1 protein TRANSPORT INHIBITOR RESPONSE 1-like=Olea europaea var. sylvestris
LOC111366102	5.18061	36.2676	1.63e-96	XP_022842525.1	ABP20 auxin-binding protein ABP20-like=Olea europaea var. sylvestris
LOC111411589	4.77009	27.286	1.73e-98	XP_022897866.1	ABP20 auxin-binding protein ABP20-like=Olea europaea var. sylvestris
LOC111377657	1.05289	2.07469	2.56e-10	XP_022856551.1	IAA26 auxin-responsive protein IAA26-like, transcript variant X3=Olea europaea var. sylvestris
LOC111367154	1.03797	2.05333	1.12e-12	XP_022843651.1	IAA27 auxin-responsive protein IAA27-like=Olea europaea var. sylvestris
LOC111405132	0.698074	1.62234	8.59e-06	XP_022889652.1	IAA27 auxin-responsive protein IAA27-like=Olea europaea var. sylvestris
LOC111402809	1.5245	2.87688	1.94e-12	XP_022886908.1	IAA8 auxin-responsive protein IAA8-like=Olea europaea var. sylvestris
LOC111380428	0.732456	1.66146	1.12e-10	XP_022859760.1	IAA9 auxin-responsive protein IAA9-like, transcript variant X5=Olea europaea var. sylvestris
LOC111397453	0.562381	1.4767	1.05e-07	XP_022880166.1	AFB2 AUXIN SIGNALING F-BOX 2 protein AUXIN SIGNALING F-BOX 2-like, transcript variant X2=Olea europaea var. sylvestris
LOC111374039	1.9801	3.9452	1.63e-23	XP_022852429.1	ARF uncharacterized LOC111374039=Olea europaea var. sylvestris
LOC111409807	1.30299	2.46739	1.11e-26	XP_022895634.1	ARF1 X6 auxin response factor 1, transcript variant X6=Olea europaea var. sylvestris
LOC111369910	2.82248	7.0738	3.04e-12	XP_022847394.1	ARF10 X3 auxin response factor 10-like, transcript variant X3=Olea europaea var. sylvestris
LOC111372350	0.956606	1.94074	1.67e-15	XP_022850416.1	ARF17 auxin response factor 17-like=Olea europaea var. sylvestris
LOC111386416	0.786279	1.72462	0.00382393	XP_022866648.1	ARF17 auxin response factor 17-like=Olea europaea var. sylvestris
LOC111369403	1.1538	2.22499	1.38e-11	XP_022846671.1	ARF18 X2 auxin response factor 18-like, transcript variant X2=Olea europaea var. sylvestris
LOC111409930	0.993329	1.99077	8.21e-05	XP_022895821.1	ARF18 X4 auxin response factor 18-like, transcript variant X4=Olea europaea var. sylvestris
LOC111366326	1.15474	2.22645	1.56e-16	XP_022842837.1	ARF19 X2 auxin response factor 19-like, transcript variant X2=Olea europaea var. sylvestris
LOC111369829	0.803921	1.74584	7.4e-09	XP_022847289.1	ARF19 X3 auxin response factor 19-like, transcript variant X3=Olea europaea var. sylvestris
LOC111393500	1.3209	2.49821	1.2e-05	XP_022874817.1	ARF22 auxin response factor 22-like=Olea europaea var. sylvestris
LOC111401409	0.437997	1.35472	0.000825512	XP_022884900.1	ARF2B X2 auxin response factor 2B, transcript variant X2=Olea europaea var. sylvestris
LOC111370596	2.24467	4.73929	8.29e-24	XP_022848157.1	ARF3 X3 auxin response factor 3-like, transcript variant X3=Olea europaea var. sylvestris
LOC111385592	3.72998	13.2689	2.24e-39	XP_022865769.1	ARF4 auxin response factor 4-like=Olea europaea var. sylvestris
LOC111393658	0.746396	1.6776	8.89e-11	XP_022875076.1	ARF4 X2 auxin response factor 4, transcript variant X2=Olea europaea var. sylvestris
LOC111380232	1.72055	3.29563	1.74e-37	XP_022859505.1	ARF5 X6 auxin response factor 5-like, transcript variant X6=Olea europaea var. sylvestris
LOC111412249	0.279088	1.21343	0.0131707	XP_022898867.1	ARF6 auxin response factor 6=Olea europaea var. sylvestris
LOC111370501	1.00108	2.0015	2.82e-13	XP_022847985.1	ARF6 auxin response factor 6-like=Olea europaea var. sylvestris
LOC111380460	0.656374	1.57612	3.8e-08	XP_022859803.1	ARF8 X3 auxin response factor 8-like, transcript variant X3=Olea europaea var. sylvestris
LOC111381921	3.7944	13.8748	2.71e-105	XP_022861541.1	ARF9 auxin response factor 9-like=Olea europaea var. sylvestris
LOC111390474	3.50305	11.3377	1.39e-86	XP_022871290.1	ARF9 auxin response factor 9-like=Olea europaea var. sylvestris
LOC111375479	6.83284	113.996	3.86e-171	XP_022854076.1	ARF9 X2 auxin response factor 9-like, transcript variant X2=Olea europaea var. sylvestris
LOC111371732	4.1848	18.1865	1.99e-26	XP_022849636.1	ARF9 X3 auxin response factor 9-like, transcript variant X3=Olea europaea var. sylvestris
LOC111388879	3.66566	12.6904	2.46e-77	XP_022869468.1	ARF9 X5 auxin response factor 9-like, transcript variant X5=Olea europaea var. sylvestris
LOC111388047	0.822803	1.76884	0.00837816	XP_022868478.1	SAUR50 auxin-responsive protein SAUR50-like=Olea europaea var. sylvestris
LOC111394934	1.53295	2.89376	2.55e-05	XP_022876747.1	SAUR50 auxin-responsive protein SAUR50-like=Olea europaea var. sylvestris
LOC111410569	2.20634	4.61501	3.4e-39	XP_022896750.1	SAUR50 auxin-responsive protein SAUR50-like=Olea europaea var. sylvestris
LOC111409760	0.350331	1.27485	0.00746625	XP_022895547.1	LNK1 protein LNK1-like, transcript variant X4=Olea europaea var. sylvestris
LOC111396641	1.01288	2.01794	1.02e-05	XP_022878843.1	PCNT115 auxin-induced protein PCNT115-like=Olea europaea var. sylvestris
LOC111398769	1.43505	2.70391	6.05e-06	XP_022881624.1	PCNT115 auxin-induced protein PCNT115-like=Olea europaea var. sylvestris
LOC111393760	1.58056	2.99087	1.85e-35	XP_022875219.1	AIR12 auxin-induced in root cultures protein 12=Olea europaea var. sylvestris
LOC111366183	3.06028	8.34136	3.54e-18	XP_022842648.1	AUX22C auxin-induced protein 22C-like=Olea europaea var. sylvestris
LOC111376976	2.20798	4.62026	3.25e-28	XP_022855757.1	AUX22C auxin-induced protein 22C-like=Olea europaea var. sylvestris
LOC111373403	5.16619	35.9069	6.84e-13	XP_022851712.1	AUX22D auxin-induced protein 22D-like=Olea europaea var. sylvestris
LOC111396072	0.815933	1.76044	2.66e-10	XP_022878113.1	ARP auxin-repressed 12.5 kDa protein-like, transcript variant X2=Olea europaea var. sylvestris
LOC111410034	0.677077	1.5989	5.79e-05	XP_022895959.1	DAM3 dormancy-associated protein homolog 3-like=Olea europaea var. sylvestris
LOC111393060	1.15007	2.21925	1.09e-06	XP_022874228.1	FORKED1 VAN3-binding protein-like=Olea europaea var. sylvestris
LOC111411816	3.5459	11.6795	6.82e-26	XP_022898201.1	FORKED1 VAN3-binding protein-like=Olea europaea var. sylvestris
LOC111393893	0.992637	1.98982	9.85e-05	XP_022875431.1	FORKED1 VAN3-binding protein-like, transcript variant X2=Olea europaea var. sylvestris
P14 vs. P0_DOWN
Genes	log2FoldChange	FoldChange	pvalue	Gene_ID	Description
LOC111402434	-0.701908	-1.62665	0.00193961	XP_022886496.1	TSB1 tryptophan synthase beta chain 1-like=Olea europaea var. sylvestris
LOC111374581	-0.638914	-1.55716	0.00637937	XP_022853045.1	TSB2 tryptophan synthase beta chain 2=Olea europaea var. sylvestris
LOC111401708	-1.00325	-2.00452	3.31e-06	XP_022885335.1	TAR2 tryptophan aminotransferase-related protein 2-like, transcript variant X2=Olea europaea var. sylvestris
LOC111388559	-0.427492	-1.34489	0.0042436	XP_022869081.1	YUCCA10 indole-3-pyruvate monooxygenase YUCCA10=Olea europaea var. sylvestris
LOC111376415	-2.22675	-4.68078	6.08e-12	XP_022855144.1	YUCCA7 indole-3-pyruvate monooxygenase YUCCA7=Olea europaea var. sylvestris
LOC111404113	-1.58389	-2.99778	0.00109595	XP_022888622.1	PIN1b auxin efflux carrier component 1b=Olea europaea var. sylvestris
LOC111394988	-2.53804	-5.80801	5.64e-10	XP_022876783.1	PIL2 protein PIN-LIKES 2-like=Olea europaea var. sylvestris
LOC111367367	-1.3809	-2.60431	3.63e-36	XP_022843960.1	PIL2 X3 protein PIN-LIKES 2-like, transcript variant X3=Olea europaea var. sylvestris
LOC111396747	-2.31521	-4.97676	1.75e-18	XP_022879017.1	PIL3 X6 protein PIN-LIKES 3-like, transcript variant X6=Olea europaea var. sylvestris
LOC111392867	-0.734058	-1.66331	0.000623805	XP_022874037.1	PIL4 X3 protein PIN-LIKES 4-like, transcript variant X3=Olea europaea var. sylvestris
LOC111381291	-1.23942	-2.36104	3.77e-15	XP_022860832.1	PIL6 X3 protein PIN-LIKES 6-like, transcript variant X3=Olea europaea var. sylvestris
LOC111376321	-0.556267	-1.47046	8.21e-05	XP_022855041.1	PIL7 X3 protein PIN-LIKES 7, transcript variant X3=Olea europaea var. sylvestris
LOC111397193	-1.29119	-2.4473	3.87e-13	XP_022879740.1	PIL7 X32 rotein PIN-LIKES 7-like, transcript variant X2=Olea europaea var. sylvestris
LOC111365244	-2.11486	-4.33149	1.57e-43	XP_022841429.1	LAX2 auxin transporter-like protein 2=Olea europaea var. sylvestris
LOC111408115	-1.0566	-2.08003	5.02e-20	XP_022893678.1	LAX2 auxin transporter-like protein 2=Olea europaea var. sylvestris
LOC111402029	-1.71865	-3.29128	3.85e-16	XP_022885827.1	LAX3 auxin transporter-like protein 3=Olea europaea var. sylvestris
LOC111411983	-1.69153	-3.23	1.2e-28	XP_022898464.1	GH3.1 indole-3-acetic acid-amido synthetase GH3.1=Olea europaea var. sylvestris
LOC111375834	-1.46411	-2.75893	5.22e-32	XP_022854515.1	GH3.1 indole-3-acetic acid-amido synthetase GH3.1=Olea europaea var. sylvestris
LOC111405087	-0.588115	-1.50328	0.000267201	XP_022889573.1	ILR1 1 IAA-amino acid hydrolase ILR1-like 1=Olea europaea var. sylvestris
LOC111380794	-1.4887	-2.80637	2.52e-43	XP_022860209.1	ILR1 6 X3 IAA-amino acid hydrolase ILR1-like 6, transcript variant X3=Olea europaea var. sylvestris
LOC111394354	-2.07014	-4.19928	1.44e-45	XP_022875891.1	ILR1 6 X3 IAA-amino acid hydrolase ILR1-like 6, transcript variant X3=Olea europaea var. sylvestris
LOC111388560	-0.313527	-1.24274	0.00728792	XP_022869083.1	TIR1 X2 protein TRANSPORT INHIBITOR RESPONSE 1-like, transcript variant X2=Olea europaea var. sylvestris
LOC111407157	-2.1992	-4.59225	4.09e-67	XP_022892250.1	TIR1 X2 protein TRANSPORT INHIBITOR RESPONSE 1-like, transcript variant X2=Olea europaea var. sylvestris
LOC111378080	-0.50174	-1.41592	0.0189681	XP_022857015.1	IAA14 auxin-responsive protein IAA14-like=Olea europaea var. sylvestris
LOC111393714	-4.14892	-17.7398	3.65e-51	XP_022875154.1	IAA14 auxin-responsive protein IAA14-like=Olea europaea var. sylvestris
LOC111383761	-0.784469	-1.72246	1.79e-07	XP_022863678.1	IAA16 auxin-responsive protein IAA16=Olea europaea var. sylvestris
LOC111377488	-0.663657	-1.58409	5.97e-05	XP_022856362.1	IAA16 auxin-responsive protein IAA16-like=Olea europaea var. sylvestris
LOC111376975	-1.93695	-3.82896	4.24e-10	XP_022855756.1	IAA17 X4 auxin-responsive protein IAA17-like, transcript variant X4=Olea europaea var. sylvestris
LOC111401565	-1.583	-2.99591	2.82e-21	XP_022885126.1	IAA26 auxin-responsive protein IAA26-like=Olea europaea var. sylvestris
LOC111404933	-2.80959	-7.01084	7.38e-23	XP_022889427.1	IAA33 auxin-responsive protein IAA33-like=Olea europaea var. sylvestris
LOC111365464	-0.531325	-1.44526	0.00937542	XP_022841785.1	ARF18 auxin response factor 18-like=Olea europaea var. sylvestris
LOC111374034	-0.916153	-1.88708	6.06e-09	XP_022852417.1	ARF18 auxin response factor 18-like=Olea europaea var. sylvestris
LOC111375524	-0.748823	-1.68042	0.0264976	XP_022854132.1	ARF18 auxin response factor 18-like=Olea europaea var. sylvestris
LOC111366099	-1.09261	-2.1326	9.2e-21	XP_022842521.1	ARF19 auxin response factor 19-like=Olea europaea var. sylvestris
LOC111366891	-1.16088	-2.23594	5.15e-19	XP_022843346.1	ARF19 auxin response factor 19-like=Olea europaea var. sylvestris
LOC111399798	-0.882753	-1.84389	1.61e-14	XP_022883057.1	ARF19 auxin response factor 19-like=Olea europaea var. sylvestris
LOC111406439	-0.628433	-1.54589	9.76e-05	XP_022891632.1	ARF2A auxin response factor 2A-like=Olea europaea var. sylvestris
LOC111407245	-0.89409	-1.85844	4.74e-12	XP_022892388.1	ARF3 X6 auxin response factor 3-like, transcript variant X6=Olea europaea var. sylvestris
LOC111367727	-1.51	-2.84809	1.89e-24	XP_022844523.1	SAUR32 auxin-responsive protein SAUR32-like=Olea europaea var. sylvestris
LOC111393889	-3.73713	-13.3349	7.62e-90	XP_022875429.1	SAUR32 auxin-responsive protein SAUR32-like=Olea europaea var. sylvestris
LOC111405653	-2.86931	-7.30716	2.47e-74	XP_022890399.1	SAUR32 auxin-responsive protein SAUR32-like=Olea europaea var. sylvestris
LOC111368774	-2.62023	-6.14847	3.22e-24	XP_022845979.1	SAUR36 auxin-responsive protein SAUR36=Olea europaea var. sylvestris
LOC111382928	-1.31564	-2.48912	2.15e-16	XP_022862740.1	SAUR36 auxin-responsive protein SAUR36-like=Olea europaea var. sylvestris
LOC111384477	-5.95384	-61.9846	1.42e-170	XP_022864521.1	SAUR36 auxin-responsive protein SAUR36-like=Olea europaea var. sylvestris
LOC111394028	-1.42355	-2.68245	9.44e-06	XP_022875586.1	SAUR36 auxin-responsive protein SAUR36-like=Olea europaea var. sylvestris
LOC111399808	-5.95788	-62.1585	6.95e-230	XP_022883071.1	SAUR41 X3 auxin-responsive protein SAUR41-like, transcript variant X3=Olea europaea var. sylvestris
LOC111402646	-4.7848	-27.5656	2.25e-29	XP_022886787.1	SAUR50 auxin-responsive protein SAUR50-like=Olea europaea var. sylvestris
LOC111378179	-2.79679	-6.94892	7.78e-35	XP_022857113.1	SAUR50 auxin-responsive protein SAUR50-like=Olea europaea var. sylvestris
LOC111394563	-3.63571	-12.4296	6.35e-15	XP_022876198.1	SAUR50 auxin-responsive protein SAUR50-like=Olea europaea var. sylvestris
LOC111381635	-5.6296	-49.5084	1.23e-183	XP_022861202.1	SAUR62 auxin-responsive protein SAUR62-like, transcript variant X2=Olea europaea var. sylvestris
LOC111385898	-0.661786	-1.58204	7.9e-05	XP_022866088.1	SAUR66 auxin-responsive protein SAUR66-like=Olea europaea var. sylvestris
LOC111370706	-0.985118	-1.97948	0.000333198	XP_022848311.1	SAUR71 auxin-responsive protein SAUR71-like=Olea europaea var. sylvestris
LOC111400044	-1.01885	-2.02631	5.32e-05	XP_022883272.1	SAUR71 auxin-responsive protein SAUR71-like=Olea europaea var. sylvestris
LOC111365787	-2.70409	-6.51646	5.7e-39	XP_022842078.1	SAUR72 auxin-responsive protein SAUR72-like=Olea europaea var. sylvestris
LOC111371435	-2.11896	-4.3438	4.57e-38	XP_022849189.1	ARGOS protein AUXIN-REGULATED GENE INVOLVED IN ORGAN SIZE=Olea europaea var. sylvestris
LOC111382211	-7.01454	-129.297	0	XP_022861884.1	DAM1 dormancy-associated protein 1-like=Olea europaea var. sylvestris
LOC111389844	-1.07692	-2.10953	0.000407885	XP_022870589.1	DAM3 dormancy-associated protein homolog 3-like=Olea europaea var. sylvestris
LOC111367668	-2.93352	-7.63974	4e-11	XP_022844423.1	DAM4 dormancy-associated protein homolog 4-like=Olea europaea var. sylvestris
LOC111401862	-5.32512	-40.0886	9.41e-145	XP_022885586.1	DAM4 X2 dormancy-associated protein homolog 4-like, transcript variant X2=Olea europaea var. sylvestris
LOC111373109	-3.12918	-8.74937	9.54e-13	XP_022851361.1	AUX15A auxin-induced protein 15A-like=Olea europaea var. sylvestris
LOC111380646	-4.00624	-16.0693	7.22e-29	XP_022860044.1	AUX15A auxin-induced protein 15A-like=Olea europaea var. sylvestris
LOC111410572	-2.73993	-6.68037	7.37e-23	XP_022896752.1	AUX15A auxin-induced protein 15A-like=Olea europaea var. sylvestris
LOC111383589	-2.08209	-4.2342	8.86e-43	XP_022863474.1	AUX22D auxin-induced protein 22D-like=Olea europaea var. sylvestris
LOC111391421	-0.846559	-1.79821	8.82e-07	XP_022872404.1	AUX22D auxin-induced protein 22D-like=Olea europaea var. sylvestris
LOC111371699	-1.48275	-2.79482	1.41e-24	XP_022849596.1	FORKED1 VAN3-binding protein-like=Olea europaea var. sylvestris
P28 vs. P14_UP
Genes	log2FoldChange	FoldChange	pvalue	Gene_ID	Description
LOC111376046	0.992863	1.99013	6.91472e-06	XP_022854742.1	TRPA1 tryptophan synthase alpha chain-like, transcript variant X2=Olea europaea var. sylvestris
LOC111367367	0.521916	1.43586	0.0107456	XP_022843960.1	PIL2 X3 protein PIN-LIKES 2-like, transcript variant X3=Olea europaea var. sylvestris
LOC111381291	1.2524	2.38238	5.44417e-18	XP_022860832.1	PIL6 X3 protein PIN-LIKES 6-like, transcript variant X3=Olea europaea var. sylvestris
LOC111397193	0.696736	1.62083	1.11587e-06	XP_022879740.1	PIL7 X2 protein PIN-LIKES 7-like, transcript variant X2=Olea europaea var. sylvestris
LOC111365275	0.401011	1.32043	0.00454856	XP_022841487.1	PIN1 X2, auxin efflux carrier component 1-like, transcript variant X2=Olea europaea var. sylvestris
LOC111406943	2.73129	6.64047	1.1513e-24	XP_022892064.1	PIN5 auxin efflux carrier component 5-like=Olea europaea var. sylvestris
LOC111411983	2.93583	7.65195	9.98688e-57	XP_022898464.1	GH3.1 indole-3-acetic acid-amido synthetase GH3.1=Olea europaea var. sylvestris
LOC111390207	2.25678	4.77922	3.84605e-14	XP_022870980.1	GH3.1 indole-3-acetic acid-amido synthetase GH3.1=Olea europaea var. sylvestris
LOC111401397	0.386517	1.30723	0.00698727	XP_022884881.1	TIR1 transport inhibitor response 1-like protein=Olea europaea var. sylvestris
LOC111385397	0.495688	1.40999	0.00161764	XP_022865551.1	TIR1 X4 protein TRANSPORT INHIBITOR RESPONSE 1-like, transcript variant X4=Olea europaea var. sylvestris
LOC111388552	0.637048	1.55514	0.00218049	XP_022869072.1	T85 X4 auxin-binding protein T85-like, transcript variant X4=Olea europaea var. sylvestris
LOC111366102	1.53716	2.90223	2.44103e-09	XP_022842525.1	ABP20 auxin-binding protein ABP20-like=Olea europaea var. sylvestris
LOC111411589	1.0881	2.12593	1.20933e-05	XP_022897866.1	ABP20 auxin-binding protein ABP20-like=Olea europaea var. sylvestris
LOC111367154	0.589219	1.50443	0.00543864	XP_022843651.1	IAA27 auxin-responsive protein IAA27-like=Olea europaea var. sylvestris
LOC111400014	1.35182	2.55233	5.72652e-06	XP_022883260.1	IAA29 X2 auxin-responsive protein IAA29-like, transcript variant X2=Olea europaea var. sylvestris
LOC111380428	0.319814	1.24817	0.0094646	XP_022859760.1	IAA9 X5 auxin-responsive protein IAA9-like, transcript variant X5=Olea europaea var. sylvestris
LOC111373477	1.89929	3.73029	3.33196e-05	XP_022851781.1	ARF auxin responsive protein uncharacterized LOC111373477=Olea europaea var. sylvestris
LOC111374039	0.392515	1.31268	0.0114255	XP_022852429.1	ARF auxin responsive protein uncharacterized LOC111374039=Olea europaea var. sylvestris
LOC111400085	0.735828	1.66535	0.00570196	XP_022883302.1	ARF auxin responsive protein uncharacterized LOC111400085=Olea europaea var. sylvestris
LOC111385610	0.882186	1.84317	0.00111949	XP_022865785.1	ARF18 auxin response factor 18-like=Olea europaea var. sylvestris
LOC111375524	0.856695	1.81089	0.00669262	XP_022854132.1	ARF18 auxin response factor 18-like=Olea europaea var. sylvestris
LOC111409930	1.04445	2.06258	5.09163e-08	XP_022895821.1	ARF18 X4 auxin response factor 18-like, transcript variant X4=Olea europaea var. sylvestris
LOC111385592	0.80014	1.74127	2.97338e-07	XP_022865769.1	ARF4 auxin response factor 4-like=Olea europaea var. sylvestris
LOC111371065	1.40984	2.65708	0.000873748	XP_022848749.1	ARF4 auxin response factor 4-like=Olea europaea var. sylvestris
LOC111380460	0.96923	1.9578	9.89769e-13	XP_022859803.1	ARF8 X3 auxin response factor 8-like, transcript variant X3=Olea europaea var. sylvestris
LOC111368066	0.627138	1.5445	6.95552e-06	XP_022845024.1	ARF8 X5 auxin response factor 8-like, transcript variant X5=Olea europaea var. sylvestris
LOC111390474	1.17514	2.25816	4.45087e-06	XP_022871290.1	ARF9 auxin response factor 9-like=Olea europaea var. sylvestris
LOC111381921	0.607498	1.52361	0.00908072	XP_022861541.1	ARF9 auxin response factor 9-like=Olea europaea var. sylvestris
LOC111375479	0.822867	1.76892	3.21753e-05	XP_022854076.1	ARF9 X2 auxin response factor 9-like, transcript variant X2=Olea europaea var. sylvestris
LOC111371732	0.654534	1.57411	0.00399149	XP_022849636.1	ARF9 X3 auxin response factor 9-like, transcript variant X3=Olea europaea var. sylvestris
LOC111394934	1.3985	2.63627	2.11204e-10	XP_022876747.1	SAUR50 auxin-responsive protein SAUR50-like=Olea europaea var. sylvestris
LOC111410569	0.996655	1.99537	1.69445e-05	XP_022896750.1	SAUR50 auxin-responsive protein SAUR50-like=Olea europaea var. sylvestris
LOC111388047	0.973992	1.96427	2.28115e-05	XP_022868478.1	SAUR50 auxin-responsive protein SAUR50-like=Olea europaea var. sylvestris
LOC111365787	1.14138	2.20592	0.00227506	XP_022842078.1	SAUR72 auxin-responsive protein SAUR72-like=Olea europaea var. sylvestris
LOC111394931	1.77153	3.41415	3.57751e-08	XP_022876745.1	ARG7 indole-3-acetic acid-induced protein ARG7-like=Olea europaea var. sylvestris
LOC111393760	1.14499	2.21145	4.24182e-14	XP_022875219.1	AIR12 auxin-induced in root cultures protein 12=Olea europaea var. sylvestris
LOC111366183	0.716496	1.64319	0.000355703	XP_022842648.1	AUX22C auxin-induced protein 22C-like=Olea europaea var. sylvestris
LOC111380256	1.64547	3.1285	1.53067e-11	XP_022859538.1	AUX22D auxin-induced protein 22D-like=Olea europaea var. sylvestris
LOC111384867	1.14894	2.21751	0.00140011	XP_022864974.1	FORKED1 VAN3-binding protein-like=Olea europaea var. sylvestris
LOC111393060	0.61757	1.53429	0.00235483	XP_022874228.1	FORKED1 VAN3-binding protein-like=Olea europaea var. sylvestris
P28 vs. P14_DOWN
Genes	log2FoldChange	FoldChange	pvalue	Gene_ID	Description
LOC111402434	-4.31379	-19.8876	1.3838e-21	XP_022886496.1	TSB1 tryptophan synthase beta chain 1-like=Olea europaea var. sylvestris
LOC111373056	-0.857685	-1.81213	0.00445661	XP_022851294.1	TAR4 tryptophan aminotransferase-related protein 4-like=Olea europaea var. sylvestris
LOC111388559	-0.930778	-1.9063	1.07715e-07	XP_022869081.1	YUCCA10 indole-3-pyruvate monooxygenase YUCCA10=Olea europaea var. sylvestris
LOC111376321	-5.71629	-52.5745	1.805e-54	XP_022855041.1	PIL7 X3 protein PIN-LIKES 7, transcript variant X3=Olea europaea var. sylvestris
LOC111402155	-0.63822	-1.55641	0.000796448	XP_022886082.1	PIN1 auxin efflux carrier component 1-like=Olea europaea var. sylvestris
LOC111405232	-0.726412	-1.65452	0.000377227	XP_022889803.1	PIN1C auxin efflux carrier component 1c, transcript variant X3=Olea europaea var. sylvestris
LOC111395225	-1.21812	-2.32644	3.35766e-16	XP_022876988.1	PIN7 auxin efflux carrier component 7-like=Olea europaea var. sylvestris
LOC111396336	-3.06349	-8.35995	1.76807e-15	XP_022878513.1	PIN7 auxin efflux carrier component 7-like=Olea europaea var. sylvestris
LOC111380268	-2.6803	-6.4099	1.50705e-73	XP_022859549.1	LAX2 auxin transporter-like protein 2=Olea europaea var. sylvestris
LOC111365244	-0.950934	-1.93312	1.31711e-06	XP_022841429.1	LAX2 auxin transporter-like protein 2=Olea europaea var. sylvestris
LOC111408115	-0.782959	-1.72066	2.54152e-05	XP_022893678.1	LAX2 auxin transporter-like protein 2=Olea europaea var. sylvestris
LOC111399329	-0.620547	-1.53746	0.00164195	XP_022882353.1	LAX2 auxin transporter-like protein 2=Olea europaea var. sylvestris
LOC111397432	-1.49462	-2.8179	1.42479e-09	XP_022880124.1	GH3.6 indole-3-acetic acid-amido synthetase GH3.6=Olea europaea var. sylvestris
LOC111403938	-3.34137	-10.1357	1.31727e-57	XP_022888388.1	GH3.6 indole-3-acetic acid-amido synthetase GH3.6-like=Olea europaea var. sylvestris
LOC111395681	-1.47933	-2.78819	9.7758e-13	XP_022877558.1	GH3.6 indole-3-acetic acid-amido synthetase GH3.6-like=Olea europaea var. sylvestris
LOC111412397	-1.63725	-3.11072	1.8568e-12	XP_022899083.1	GH3.9 indole-3-acetic acid-amido synthetase GH3.9=Olea europaea var. sylvestris
LOC111380794	-2.84906	-7.20531	3.17863e-63	XP_022860209.1	ILR1 6 IAA-amino acid hydrolase ILR1-like 6, transcript variant X3=Olea europaea var. sylvestris
LOC111394354	-1.9246	-3.79632	6.0938e-16	XP_022875891.1	ILR1 6 IAA-amino acid hydrolase ILR1-like 6, transcript variant X3=Olea europaea var. sylvestris
LOC111369824	-0.998362	-1.99773	1.34414e-10	XP_022847260.1	TIR1 protein TRANSPORT INHIBITOR RESPONSE 1-like=Olea europaea var. sylvestris
LOC111407157	-1.56949	-2.968	2.1996e-24	XP_022892250.1	TIR1 X2 protein TRANSPORT INHIBITOR RESPONSE 1-like, transcript variant X2=Olea europaea var. sylvestris
LOC111378080	-1.96561	-3.90577	4.09212e-12	XP_022857015.1	IAA14 auxin-responsive protein IAA14-like=Olea europaea var. sylvestris
LOC111401565	-2.24509	-4.74067	1.36029e-23	XP_022885126.1	IAA26 auxin-responsive protein IAA26-like=Olea europaea var. sylvestris
LOC111377657	-1.89954	-3.73095	3.7656e-17	XP_022856551.1	IAA26 X3 auxin-responsive protein IAA26-like, transcript variant X3=Olea europaea var. sylvestris
LOC111405132	-0.693606	-1.61732	0.000380097	XP_022889652.1	IAA27 auxin-responsive protein IAA27-like=Olea europaea var. sylvestris
LOC111405041	-1.83817	-3.57555	2.40482e-28	XP_022889499.1	IAA7 auxin-responsive protein IAA7-like=Olea europaea var. sylvestris
LOC111386508	-0.627564	-1.54495	1.20759e-05	XP_022866743.1	AFB2 protein AUXIN SIGNALING F-BOX 2-like=Olea europaea var. sylvestris
LOC111369403	-0.849706	-1.80213	5.82502e-08	XP_022846671.1	ARF18 X2 auxin response factor 18-like, transcript variant X2=Olea europaea var. sylvestris
LOC111372818	-0.498085	-1.41234	0.000181694	XP_022850995.1	ARF18 X3 auxin response factor 18-like, transcript variant X3=Olea europaea var. sylvestris
LOC111366891	-1.22801	-2.34243	1.32814e-12	XP_022843346.1	ARF19 auxin response factor 19-like=Olea europaea var. sylvestris
LOC111399798	-1.18893	-2.27984	8.00715e-10	XP_022883057.1	ARF19 auxin response factor 19-like=Olea europaea var. sylvestris
LOC111366099	-0.868736	-1.82606	2.48471e-08	XP_022842521.1	ARF19 auxin response factor 19-like=Olea europaea var. sylvestris
LOC111404210	-1.47326	-2.77649	2.70154e-19	XP_022888756.1	ARF19 X2 auxin response factor 19-like, transcript variant X2=Olea europaea var. sylvestris
LOC111369829	-0.65326	-1.57272	0.0103634	XP_022847289.1	ARF19 X3 auxin response factor 19-like, transcript variant X3=Olea europaea var. sylvestris
LOC111406439	-0.54212	-1.45611	0.00420225	XP_022891632.1	ARF2 A auxin response factor 2A-like=Olea europaea var. sylvestris
LOC111407245	-0.769045	-1.70414	5.30038e-07	XP_022892388.1	ARF3 X6 auxin response factor 3-like, transcript variant X6=Olea europaea var. sylvestris
LOC111408863	-1.83375	-3.56461	6.57637e-06	XP_022894443.1	ARF5 X3 auxin response factor 5-like, transcript variant X3=Olea europaea var. sylvestris
LOC111380232	-0.694426	-1.61824	0.000380007	XP_022859505.1	ARF5 X6 auxin response factor 5-like, transcript variant X6=Olea europaea var. sylvestris
LOC111412249	-0.366788	-1.28948	0.00877412	XP_022898867.1	ARF6 auxin response factor 6=Olea europaea var. sylvestris
LOC111367727	-1.41087	-2.65897	6.55983e-12	XP_022844523.1	SAUR32 auxin-responsive protein SAUR32-like=Olea europaea var. sylvestris
LOC111393889	-1.73529	-3.32947	1.64452e-05	XP_022875429.1	SAUR32 auxin-responsive protein SAUR32-like=Olea europaea var. sylvestris
LOC111382928	-1.42778	-2.69032	1.88969e-10	XP_022862740.1	SAUR36 auxin-responsive protein SAUR36-like=Olea europaea var. sylvestris
LOC111399808	-2.85443	-7.23216	1.29535e-10	XP_022883071.1	SAUR41 X3 auxin-responsive protein SAUR41-like, transcript variant X3=Olea europaea var. sylvestris
LOC111381635	-1.98793	-3.96666	3.2241e-19	XP_022861202.1	SAUR62 auxin-responsive protein SAUR62-like, transcript variant X2=Olea europaea var. sylvestris
LOC111385898	-1.49522	-2.81907	6.56161e-12	XP_022866088.1	SAUR66 auxin-responsive protein SAUR66-like=Olea europaea var. sylvestris
LOC111396072	-1.69314	-3.23361	2.84513e-28	XP_022878113.1	ARP 12.5 12.5 kD auxin-repressed 12.5 kDa protein-like, transcript variant X2=Olea europaea var. sylvestris
LOC111370584	-1.8576	-3.62405	2.41399e-25	XP_022848139.1	ARP auxin-repressed 12.5 kDa protein-like, transcript variant X2=Olea europaea var. sylvestris
LOC111383589	-0.56863	-1.48311	0.00015769	XP_022863474.1	AUX22D auxin-induced protein 22D-like=Olea europaea var. sylvestris
LOC111382211	-2.75578	-6.75418	4.77939e-08	XP_022861884.1	DAM1 dormancy-associated protein 1-like=Olea europaea var. sylvestris
LOC111367668	-1.28946	-2.44436	5.60419e-12	XP_022844423.1	DAM4 dormancy-associated protein homolog 4-like=Olea europaea var. sylvestris
LOC111401862	-3.06476	-8.36727	5.41213e-11	XP_022885586.1	DAM4 X2 dormancy-associated protein homolog 4-like, transcript variant X2=Olea europaea var. sylvestris
LOC111398767	-2.87113	-7.31638	1.06641e-26	XP_022881622.1	PCNT115 auxin-induced protein PCNT115-like=Olea europaea var. sylvestris
LOC111384297	-2.21069	-4.62898	1.06165e-06	XP_022864330.1	PCNT115 auxin-induced protein PCNT115-like=Olea europaea var. sylvestris
LOC111371699	-0.499242	-1.41347	0.00370782	XP_022849596.1	FORKED1 VAN3-binding protein-like=Olea europaea var. sylvestris
LOC111393893	-1.13528	-2.19662	3.69075e-06	XP_022875431.1	FORKED1 VAN3-binding protein-like, transcript variant X2=Olea europaea var. sylvestris
CYTOKININ
P14 vs. P0_UP
Genes	log2FoldChange	FoldChange	pvalue	Gene_ID	Description
LOC111370918	0.830499	1.7783	1.19e-06	XP_022848589.1	IPI isopentenyl-diphosphate Delta-isomerase I-like=Olea europaea var. sylvestris
LOC111381592	2.34606	5.08434	1.07e-20	XP_022861155.1	LOG3 cytokinin riboside 5'-monophosphate phosphoribohydrolase LOG3-like=Olea europaea var. sylvestris
LOC111403109	1.482	2.79335	7.59e-10	XP_022887259.1	LOG3 X4 cytokinin riboside 5'-monophosphate phosphoribohydrolase LOG3-like, transcript variant X4=Olea europaea var. sylvestris
LOC111405830	0.69653	1.6206	0.00129346	XP_022890657.1	LOG8 cytokinin riboside 5'-monophosphate phosphoribohydrolase LOG8-like=Olea europaea var. sylvestris
LOC111410492	0.535524	1.44947	0.0123515	XP_022896611.1	LOG10 cytokinin riboside 5'-monophosphate phosphoribohydrolase LOG10-like=Olea europaea var. sylvestris
LOC111402996	0.647998	1.56699	0.00181674	XP_022887100.1	LOG tripeptidyl-peptidase 2-like, transcript variant X2=Olea europaea var. sylvestris
LOC111395325	1.36087	2.5684	5.81e-05	XP_022877073.1	LOG uncharacterized LOC111395325=Olea europaea var. sylvestris
LOC111403866	1.71181	3.27572	6.71e-07	XP_022888270.1	CKX1 cytokinin dehydrogenase 1-like=Olea europaea var. sylvestris
LOC111397162	3.1214	8.70234	3.25e-27	XP_022879691.1	CKX3 cytokinin dehydrogenase 3-like=Olea europaea var. sylvestris
LOC111386064	0.671447	1.59267	0.00129432	XP_022866258.1	CKX7 cytokinin dehydrogenase 7-like=Olea europaea var. sylvestris
LOC111386059	3.66899	12.7197	1.69e-49	XP_022866256.1	CKX9 cytokinin dehydrogenase 9-like=Olea europaea var. sylvestris
LOC111382142	0.401605	1.32098	0.00182763	XP_022861789.1	CKX uncharacterized LOC111382142=Olea europaea var. sylvestris
LOC111372363	1.39467	2.62929	6.11e-17	XP_022850441.1	HK2 X7 histidine kinase 2-like, transcript variant X7=Olea europaea var. sylvestris
LOC111372365	0.885892	1.84791	0.000915166	XP_022850442.1	HK2 histidine kinase 2-like=Olea europaea var. sylvestris
LOC111380371	1.48141	2.79221	1.44e-15	XP_022859678.1	HK4 X2 histidine kinase 4, transcript variant X2=Olea europaea var. sylvestris
LOC111381499	0.414415	1.33276	0.000372026	XP_022861054.1	HK3 histidine kinase 3-like=Olea europaea var. sylvestris
LOC111369288	0.789474	1.72844	3.49e-07	XP_022846507.1	HK3 histidine kinase 3-like=Olea europaea var. sylvestris
LOC111386177	1.13736	2.19978	0.00255351	XP_022866401.1	ARR5 two-component response regulator ARR5-like=Olea europaea var. sylvestris
LOC111374144	2.61269	6.11644	1.66e-16	XP_022852545.1	ARR5 X2 two-component response regulator ARR5-like, transcript variant X2=Olea europaea var. sylvestris
LOC111389175	0.469453	1.38458	0.000448727	XP_022869835.1	ARR12 X2 two-component response regulator ARR12-like, transcript variant X2=Olea europaea var. sylvestris
LOC111397225	1.60703	3.04624	3.07e-10	XP_022879794.1	ARR17 two-component response regulator ARR17-like=Olea europaea var. sylvestris
P14 vs. P0_DOWN
Genes	log2FoldChange	FoldChange	pvalue	Gene_ID	Description
LOC111379751	-0.81184	-1.75545	0.000959506	XP_022858957.1	IPI isopentenyl-diphosphate Delta-isomerase I=Olea europaea var. sylvestris
LOC111404220	-4.66129	-25.304	1.8e-07	XP_022888772.1	CYP735A cytokinin hydroxylase-like=Olea europaea var. sylvestris
LOC111408921	-6.21393	-74.2298	4.36e-17	XP_022894536.1	CKX5 cytokinin dehydrogenase 5=Olea europaea var. sylvestris
LOC111410497	-3.89918	-14.9201	2.41e-43	XP_022896625.1	CKX6 cytokinin dehydrogenase 6-like=Olea europaea var. sylvestris
LOC111399824	-1.35718	-2.56183	8.28e-06	XP_022883085.1	CKX uncharacterized protein LOC111399824=Olea europaea var. sylvestris
LOC111375019	-1.98476	-3.95798	2.14e-74	XP_022853578.1	ZOX zeatin O-xylosyltransferase-like=Olea europaea var. sylvestris
LOC111378946	-2.92392	-7.58904	8.21e-21	XP_022858013.1	LOG1 X2 cytokinin riboside 5'-monophosphate phosphoribohydrolase LOG1-like, transcript variant X2=Olea europaea var. sylvestris
LOC111381996	-2.70217	-6.50778	1.25e-10	XP_022861619.1	LOG5 cytokinin riboside 5'-monophosphate phosphoribohydrolase LOG5-like=Olea europaea var. sylvestris
LOC111385244	-0.685187	-1.60791	0.00210271	XP_022865390.1	LOG8 X2 cytokinin riboside 5'-monophosphate phosphoribohydrolase LOG8-like, transcript variant X2=Olea europaea var. sylvestris
LOC111405207	-1.11199	-2.16144	8.7e-09	XP_022889766.1	LOG uncharacterized LOC111405207, transcript variant X2=Olea europaea var. sylvestris
LOC111404972	-5.79618	-55.5678	9.13e-14	XP_022889461.1	HK CBL-interacting serine/threonine-protein kinase 21-like=Olea europaea var. sylvestris
LOC111407497	-1.81721	-3.524	3.44e-10	XP_022892776.1	HK uncharacterized LOC111407497=Olea europaea var. sylvestris
LOC111388314	-0.604473	-1.52042	0.0131869	XP_022868760.1	CKI1 histidine kinase CKI1-like=Olea europaea var. sylvestris
LOC111405272	-0.918789	-1.89053	8.68e-11	XP_022889846.1	ARR15 two-component response regulator ARR15-like=Olea europaea var. sylvestris
LOC111370563	-0.613496	-1.52996	0.0199776	XP_022848106.1	ARR8 two-component response regulator ARR8-like, transcript variant X2=Olea europaea var. sylvestris
P28 vs. P14_UP
Genes	log2FoldChange	FoldChange	pvalue	Gene_ID	Description
LOC111370918	0.707449	1.63291	0.000555617	XP_022848589.1	IPI isopentenyl-diphosphate Delta-isomerase I-like=Olea europaea var. sylvestris
LOC111380682	1.58803	3.00638	2.50926e-06	XP_022860079.1	LOG3 cytokinin riboside 5'-monophosphate phosphoribohydrolase LOG3=Olea europaea var. sylvestris
LOC111381592	0.537363	1.45132	0.00710663	XP_022861155.1	LOG3 cytokinin riboside 5'-monophosphate phosphoribohydrolase LOG3-like=Olea europaea var. sylvestris
LOC111386059	0.593512	1.50892	9.29137e-05	XP_022866256.1	CKX9 cytokinin dehydrogenase 9-like=Olea europaea var. sylvestris
LOC111397162	1.5878	3.0059	4.50127e-25	XP_022879691.1	CKX3 cytokinin dehydrogenase 3-like=Olea europaea var. sylvestris
LOC111375020	2.93775	7.66214	6.85863e-10	XP_022853581.1	ZOG X2 zeatin O-glucosyltransferase-like, transcript variant X2=Olea europaea var. sylvestris
LOC111398814	0.489809	1.40426	0.00133531	XP_022881690.1	HK3 histidine kinase 3-like=Olea europaea var. sylvestris
LOC111380371	0.815554	1.75997	2.00388e-05	XP_022859678.1	HK4 histidine kinase 4, transcript variant X2=Olea europaea var. sylvestris
LOC111393182	0.683693	1.60625	0.00610269	XP_022874362.1	HK5 X5 histidine kinase 5-like, transcript variant X5=Olea europaea var. sylvestris
LOC111377280	1.0313	2.04386	0.000369262	XP_022856121.1	ARR6 two-component response regulator ARR6-like=Olea europaea var. sylvestris
LOC111391187	1.40306	2.64462	1.34111e-05	XP_022872116.1	ARR8 two-component response regulator ARR8-like=Olea europaea var. sylvestris
LOC111396155	1.19268	2.28577	5.64271e-05	XP_022878244.1	ARR5 wo-component response regulator ARR5-like=Olea europaea var. sylvestris
P28 vs.P14_DOWN
Genes	log2FoldChange	FoldChange	pvalue	Gene_ID	Description
LOC111365958	-2.71515	-6.56663	1.12532e-36	XP_022842308.1	ZOG zeatin O-glucosyltransferase-like=Olea europaea var. sylvestris
LOC111375019	-0.879892	-1.84024	6.18945e-09	XP_022853578.1	ZOX zeatin O-xylosyltransferase-like=Olea europaea var. sylvestris
LOC111403109	-1.0853	-2.12181	1.33904e-06	XP_022887259.1	LOG3 X4 cytokinin riboside 5'-monophosphate phosphoribohydrolase LOG3-like, transcript variant X4=Olea europaea var. sylvestris
LOC111384629	-3.69471	-12.9485	1.44367e-26	XP_022864705.1	CKX6 cytokinin dehydrogenase 6-like=Olea europaea var. sylvestris
LOC111403866	-1.74299	-3.34729	6.7867e-11	XP_022888270.1	CKX1 cytokinin dehydrogenase 1-like=Olea europaea var. sylvestris
LOC111386064	-0.764323	-1.69857	0.000139118	XP_022866258.1	CKX7 cytokinin dehydrogenase 7-like=Olea europaea var. sylvestris
LOC111403355	-0.887098	-1.84945	1.38578e-07	XP_022887601.1	HK3 histidine kinase 3-like=Olea europaea var. sylvestris
LOC111381499	-0.446257	-1.3625	0.000880779	XP_022861054.1	HK3 histidine kinase 3-like=Olea europaea var. sylvestris
LOC111397225	-6.67499	-102.181	1.4695e-69	XP_022879794.1	ARR17 two-component response regulator ARR17-like=Olea europaea var. sylvestris
GIBBERELLIN
P14 vs. P0_UP
Genes	log2FoldChange	FoldChange	pvalue	Gene_ID	Description
LOC111384641	0.889658	1.85274	0.00558626	XP_022864719.1	CPS ent-copalyl diphosphate synthase, chloroplastic-like=Olea europaea var. sylvestris
LOC111382803	1.47961	2.78872	5.73e-34	XP_022862611.1	GGPS geranylgeranyl pyrophosphate synthase, chloroplastic=Olea europaea var. sylvestris
LOC111387124	3.25765	9.56426	2.13e-31	XP_022867418.1	GGPS heterodimeric geranylgeranyl pyrophosphate synthase small subunit, chloroplastic-like=Olea europaea var. sylvestris
LOC111412130	2.64407	6.25093	1.88e-14	XP_022898674.1	GGPS heterodimeric geranylgeranyl pyrophosphate synthase small subunit, chloroplastic-like=Olea europaea var. sylvestris
LOC111403906	3.81605	14.0847	5.83e-19	XP_022888330.1	GA20ox1 gibberellin 20 oxidase 1-D-like=Olea europaea var. sylvestris
LOC111376817	0.860657	1.81587	0.000259678	XP_022855586.1	GA2ox2 gibberellin 2-beta-dioxygenase 2-like=Olea europaea var. sylvestris
LOC111403036	0.718427	1.64539	0.0163853	XP_022887149.1	GA2ox4 gibberellin 2-beta-dioxygenase 4=Olea europaea var. sylvestris
LOC111407272	0.84929	1.80161	3.1e-07	XP_022892423.1	GA2ox gibberellin 2-beta-dioxygenase-like=Olea europaea var. sylvestris
LOC111395104	0.309699	1.23945	0.0220643	XP_022876885.1	GID1B gibberellin receptor GID1B-like=Olea europaea var. sylvestris
LOC111368769	1.69574	3.23944	1.03e-44	XP_022845970.1	GAI1 DELLA protein GAI1-like=Olea europaea var. sylvestris
LOC111376719	0.526478	1.44041	0.000482664	XP_022855465.1	GAI1 DELLA protein GAI1-like=Olea europaea var. sylvestris
LOC111401198	2.01251	4.03483	1.88e-48	XP_022884592.1	GAI1 DELLA protein GAI-like=Olea europaea var. sylvestris
LOC111378947	1.11847	2.17117	0.00477931	XP_022858014.1	GASA11 gibberellin-regulated protein 11-like=Olea europaea var. sylvestris
LOC111401692	1.18997	2.28147	4.91e-07	XP_022885321.1	GASA14 gibberellin-regulated protein 14-like=Olea europaea var. sylvestris
LOC111397152	1.70138	3.25212	1.02e-30	XP_022879678.1	RSI1 protein RSI-1-like=Olea europaea var. sylvestris
P14 vs. P0_DOWN
Genes	log2FoldChange	FoldChange	pvalue	Gene_ID	Description
LOC111371321	-7.03369	-131.024	9.72e-27	XP_022849002.1	KAO2 ent-kaurenoic acid oxidase 2-like=Olea europaea var. sylvestris
LOC111367679	-1.10588	-2.1523	9.97e-18	XP_022844439.1	GA20ox2 gibberellin 20 oxidase 2-like=Olea europaea var. sylvestris
LOC111370978	-0.860239	-1.81534	9.99e-06	XP_022848673.1	GA2ox1 gibberellin 2-beta-dioxygenase 1-like=Olea europaea var. sylvestris
LOC111395582	-0.915552	-1.88629	0.00797261	XP_022877393.1	GA2ox1 gibberellin 2-beta-dioxygenase 1-like=Olea europaea var. sylvestris
LOC111402441	-1.54821	-2.92455	1.42e-12	XP_022886508.1	GA2ox8 X3 gibberellin 2-beta-dioxygenase 8, transcript variant X3=Olea europaea var. sylvestris
LOC111389391	-1.94971	-3.86296	1.05e-17	XP_022870084.1	GA2ox8 X4 gibberellin 2-beta-dioxygenase 8-like, transcript variant X4=Olea europaea var. sylvestris
LOC111380035	-5.79068	-55.3566	7.83e-49	XP_022859269.1	GA3ox1 gibberellin 3-beta-dioxygenase 1-like=Olea europaea var. sylvestris
LOC111390342	-1.4792	-2.78794	2.32e-21	XP_022871136.1	GID1B gibberellin receptor GID1B-like=Olea europaea var. sylvestris
LOC111405746	-0.703194	-1.62811	1.47e-09	XP_022890538.1	GID1B gibberellin receptor GID1B-like=Olea europaea var. sylvestris
LOC111388554	-1.43626	-2.70618	1.88e-17	XP_022869074.1	GID1B X2 gibberellin receptor GID1B-like, transcript variant X2=Olea europaea var. sylvestris
LOC111367486	-0.644159	-1.56283	5e-08	XP_022844159.1	GAI DELLA protein GAI-like=Olea europaea var. sylvestris
LOC111384648	-1.20912	-2.31196	2.95e-05	XP_022864727.1	RGL1 DELLA protein RGL1-like=Olea europaea var. sylvestris
LOC111394838	-3.11369	-8.65593	2.03e-73	XP_022876628.1	GAMYB X4 transcription factor GAMYB, transcript variant X4=Olea europaea var. sylvestris
LOC111379399	-2.84796	-7.19984	2.65e-30	XP_022858524.1	GAMYB transcription factor GAMYB-like=Olea europaea var. sylvestris
LOC111403430	-2.77622	-6.85054	2.74e-61	XP_022887700.1	GAMYB X3 transcription factor GAMYB-like, transcript variant X3=Olea europaea var. sylvestris
LOC111405871	-1.87984	-3.68035	2.72e-34	XP_022890723.1	GAMYB X3 transcription factor GAMYB-like, transcript variant X3=Olea europaea var. sylvestris
LOC111411667	-4.47713	-22.2715	5.16e-153	XP_022897990.1	GAMYBtranscription factor GAMYB-like, transcript variant X3=Olea europaea var. sylvestris
LOC111384458	-5.0025	-32.0555	4.14e-43	XP_022864501.1	GASA11 gibberellin-regulated protein 11-like=Olea europaea var. sylvestris
LOC111409113	-4.52261	-22.9849	7.1e-61	XP_022894821.1	GASA11 gibberellin-regulated protein 11-like=Olea europaea var. sylvestris
LOC111405278	-0.46025	-1.37578	0.00143037	XP_022889850.1	GASA14 gibberellin-regulated protein 14-like=Olea europaea var. sylvestris
LOC111409620	-4.69387	-25.8819	4.87e-70	XP_022895416.1	GASA1 gibberellin-regulated protein 1-like=Olea europaea var. sylvestris
LOC111376141	-1.256	-2.38833	1.4e-17	XP_022854851.1	GASA4 gibberellin-regulated protein 4-like=Olea europaea var. sylvestris
LOC111382674	-3.69031	-12.909	2.64e-59	XP_022862480.1	GAST1 protein GAST1-like=Olea europaea var. sylvestris
LOC111400834	-3.40673	-10.6054	1.22e-141	XP_022884033.1	GAST1 protein GAST1-like=Olea europaea var. sylvestris
LOC111409639	-3.36932	-10.334	1.12e-37	XP_022895434.1	RSI1 protein RSI-1-like=Olea europaea var. sylvestris
LOC111374926	-3.04871	-8.27475	5.18e-110	XP_022853461.1	snakin-2-like=Olea europaea var. sylvestris
P28 vs. P14_UP
Genes	log2FoldChange	FoldChange	pvalue	Gene_ID	Description
LOC111394261	3.26591	9.61918	1.36145e-17	XP_022875786.1	KAO2 ent-kaurenoic acid oxidase 2-like=Olea europaea var. sylvestris
LOC111382803	0.697685	1.6219	0.00229602	XP_022862611.1	GGPS geranylgeranyl pyrophosphate synthase, chloroplastic=Olea europaea var. sylvestris
LOC111387124	1.30556	2.4718	2.82529e-09	XP_022867418.1	GGPS heterodimeric geranylgeranyl pyrophosphate synthase small subunit, chloroplastic-like=Olea europaea var. sylvestris
LOC111367679	0.887776	1.85032	0.000113822	XP_022844439.1	GA20ox2 gibberellin 20 oxidase 2-like=Olea europaea var. sylvestris
LOC111402441	1.25525	2.38708	1.43762e-05	XP_022886508.1	GA2ox8 gibberellin 2-beta-dioxygenase 8, transcript variant X3=Olea europaea var. sylvestris
LOC111384247	1.97324	3.92649	7.15849e-07	XP_022864276.1	GA3ox1 gibberellin 3-beta-dioxygenase 1-like=Olea europaea var. sylvestris
LOC111394517	1.02633	2.03684	0.000126326	XP_022876143.1	GID2 F-box protein GID2-like=Olea europaea var. sylvestris
LOC111401692	1.57103	2.97117	2.85706e-11	XP_022885321.1	GASA14 gibberellin-regulated protein 14-like=Olea europaea var. sylvestris
LOC111376141	1.25909	2.39345	7.46353e-09	XP_022854851.1	GASA4 gibberellin-regulated protein 4-like=Olea europaea var. sylvestris
LOC111409639	1.36168	2.56984	2.19075e-06	XP_022895434.1	RSI1 protein RSI-1-like=Olea europaea var. sylvestris
P28 vs. P14_DOWN
Genes	log2FoldChange	FoldChange	pvalue	Gene_ID	Description
LOC111371423	-0.523696	-1.43763	0.00500695	XP_022849176.1	GGTB geranylgeranyl transferase type-2 subunit beta 1=Olea europaea var. sylvestris
LOC111381791	-0.429213	-1.3465	0.00515953	XP_022861387.1	KAO2 ent-kaurene oxidase, chloroplastic-like, transcript variant X2=Olea europaea var. sylvestris
LOC111407272	-4.33938	-20.2434	3.2309e-63	XP_022892423.1	GA2ox2 gibberellin 2-beta-dioxygenase-like=Olea europaea var. sylvestris
LOC111403642	-1.89619	-3.72229	4.49925e-06	XP_022887988.1	GA2ox8 gibberellin 2-beta-dioxygenase 8=Olea europaea var. sylvestris
LOC111395582	-1.91767	-3.77813	4.40513e-05	XP_022877393.1	GA2ox1 gibberellin 2-beta-dioxygenase 1-like=Olea europaea var. sylvestris
LOC111369818	-0.783494	-1.72129	0.000140547	XP_022847254.1	GID1B gibberellin receptor GID1B-like=Olea europaea var. sylvestris
LOC111395104	-3.30271	-9.86765	1.12116e-60	XP_022876885.1	GID1B gibberellin receptor GID1B-like=Olea europaea var. sylvestris
LOC111405746	-2.66683	-6.35033	1.85889e-50	XP_022890538.1	GID1B gibberellin receptor GID1B-like=Olea europaea var. sylvestris
LOC111390342	-3.52238	-11.4905	3.01394e-46	XP_022871136.1	GID1B gibberellin receptor GID1B-like=Olea europaea var. sylvestris
LOC111388554	-1.54667	-2.92141	4.09748e-07	XP_022869074.1	GID1B gibberellin receptor GID1B-like, transcript variant X2=Olea europaea var. sylvestris
LOC111394838	-1.34409	-2.53869	3.43722e-07	XP_022876628.1	GAMYB X4 transcription factor GAMYB, transcript variant X4=Olea europaea var. sylvestris
LOC111403430	-0.641362	-1.5598	0.00831457	XP_022887700.1	GAMYB X3 transcription factor GAMYB-like, transcript variant X3=Olea europaea var. sylvestris
LOC111378947	-3.4658	-11.0487	8.18793e-14	XP_022858014.1	GASA11 gibberellin-regulated protein 11-like=Olea europaea var. sylvestris
LOC111409620	-2.18188	-4.53744	7.79337e-11	XP_022895416.1	GASA1 gibberellin-regulated protein 1-like=Olea europaea var. sylvestris
LOC111374926	-2.70465	-6.51899	3.58024e-26	XP_022853461.1	snakin-2-like=Olea europaea var. sylvestris
SALICYLIC ACID
P14 vs P0_UP
Genes	log2FoldChange	FoldChange	pvalue	Gene_ID	Description
LOC111372606	1.1562	2.2287	5.2e-14	XP_022850746.1	CM1 chorismate mutase 1, chloroplastic-like=Olea europaea var. sylvestris
LOC111400451	0.934229	1.91087	0.000154428	XP_022883635.1	ICS isochorismate synthase, chloroplastic-like=Olea europaea var. sylvestris
LOC111378351	1.56038	2.94931	7.56e-09	XP_022857301.1	PAL phenylalanine ammonia-lyase=Olea europaea var. sylvestris
LOC111378890	2.53163	5.78226	3.85e-125	XP_022857938.1	SABP2 salicylic acid-binding protein 2-like=Olea europaea var. sylvestris
LOC111392105	2.00149	4.00413	6.13e-26	XP_022873147.1	SABP2 salicylic acid-binding protein 2-like=Olea europaea var. sylvestris
LOC111379235	1.99381	3.98287	4.78e-52	XP_022858345.1	SABP2 X2 salicylic acid-binding protein 2-like, transcript variant X2=Olea europaea var. sylvestris
LOC111379239	0.545071	1.45909	8.39e-06	XP_022858350.1	SABP2 salicylic acid-binding protein 2-like=Olea europaea var. sylvestris
LOC111386651	0.522141	1.43609	0.0026268	XP_022866883.1	NPR2 BTB/POZ domain and ankyrin repeat-containing protein NPR2-like, transcript variant X2=Olea europaea var. sylvestris
LOC111378982	2.30581	4.94446	2.27e-15	XP_022858058.1	PR-1 pathogenesis-related protein PR-1-like=Olea europaea var. sylvestris
P14 vs. P0_DOWN
Genes	log2FoldChange	FoldChange	pvalue	Gene_ID	Description
LOC111382494	-0.858306	-1.81291	0.000107563	XP_022862259.1	CM2 chorismate mutase 2, transcript variant X2=Olea europaea var. sylvestris
LOC111372191	-0.710013	-1.63582	1.42e-07	XP_022850169.1	ICS isochorismate synthase=Olea europaea var. sylvestris
LOC111387552	-1.3243	-2.50411	5.69e-07	XP_022867892.1	PAL phenylalanine ammonia-lyase PMT26=Olea europaea var. sylvestris
LOC111389162	-1.7497	-3.36289	2.16e-06	XP_022869813.1	PAL phenylalanine ammonia-lyase=Olea europaea var. sylvestris
LOC111379838	-3.3692	-10.3331	4.13e-116	XP_022859041.1	SAMT salicylate carboxymethyltransferase-like=Olea europaea var. sylvestris
LOC111375391	-1.92734	-3.80352	2.96e-31	XP_022853980.1	SABP2 salicylic acid-binding protein 2-like=Olea europaea var. sylvestris
LOC111392101	-1.32648	-2.50791	6.66e-11	XP_022873144.1	SABP2 salicylic acid-binding protein 2-like=Olea europaea var. sylvestris
LOC111386428	-1.28348	-2.43425	0.00011894	XP_022866662.1	NPR1 BTB/POZ domain and ankyrin repeat-containing protein NPR1-like=Olea europaea var. sylvestris
LOC111401857	-0.535886	-1.44983	1.3e-05	XP_022885568.1	NPR3 X2 regulatory protein NPR3-like, transcript variant X2=Olea europaea var. sylvestris
LOC111376478	-0.866708	-1.8235	1.49e-11	XP_022855206.1	NPR5 X2 regulatory protein NPR5-like, transcript variant X2=Olea europaea var. sylvestris
LOC111384487	-0.65463	-1.57421	0.00300209	XP_022864530.1	NPR5 regulatory protein NPR5-like=Olea europaea var. sylvestris
P28 vs. P14_UP
Genes	log2FoldChange	FoldChange	pvalue	Gene_ID	Description
LOC111382494	0.45008	1.36612	0.00377394	XP_022862259.1	CM2 chorismate mutase 2, transcript variant X2=Olea europaea var. sylvestris
LOC111379838	1.73673	3.33279	1.6229e-21	XP_022859041.1	SAMT salicylate carboxymethyltransferase-like=Olea europaea var. sylvestris
LOC111391368	0.865085	1.82145	1.85605e-05	XP_022872333.1	SABP2 salicylic acid-binding protein 2-like=Olea europaea var. sylvestris
P28 vs. P14_DOWN
Genes	log2FoldChange	FoldChange	pvalue	Gene_ID	Description
LOC111372606	-0.530905	-1.44484	0.00043345	XP_022850746.1	CM1 chorismate mutase 1, chloroplastic-like=Olea europaea var. sylvestris
LOC111402181	-1.14066	-2.20481	2.54416e-13	XP_022886100.1	PAL phenylalanine ammonia-lyase-like=Olea europaea var. sylvestris
LOC111392105	-2.32304	-5.00385	6.9327e-14	XP_022873147.1	SABP2 salicylic acid-binding protein 2-like=Olea europaea var. sylvestris
LOC111376478	-1.2406	-2.36296	4.73044e-10	XP_022855206.1	NPR5 X2 regulatory protein NPR5-like, transcript variant X2=Olea europaea var. sylvestris
LOC111384487	-1.74205	-3.3451	3.56068e-16	XP_022864530.1	NPR5 regulatory protein NPR5-like=Olea europaea var. sylvestris
LOC111392101	-1.4223	-2.68012	1.31607e-08	XP_022873144.1	SABP2 salicylic acid-binding protein 2-like=Olea europaea var. sylvestris
LOC111375391	-4.41931	-21.3966	2.0849e-07	XP_022853980.1	SABP2 salicylic acid-binding protein 2-like=Olea europaea var. sylvestris
JASMONIC ACID
P14 vs. P0_UP
Genes	log2FoldChange	FoldChange	pvalue	Gene_ID	Description
LOC111388324	3.333	10.077	2.15e-46	XP_022868777.1	AOS3 allene oxide synthase 3-like=Olea europaea var. sylvestris
LOC111399032	1.35758	2.56256	0.000456144	XP_022881999.1	AOC allene oxide cyclase, chloroplastic-like=Olea europaea var. sylvestris
LOC111382804	0.64297	1.56154	0.000327108	XP_022862612.1	AOC allene oxide cyclase, chloroplastic-like=Olea europaea var. sylvestris
LOC111394433	1.1833	2.27096	1.48e-10	XP_022876027.1	JMT X2 jasmonate O-methyltransferase-like, transcript variant X2=Olea europaea var. sylvestris
LOC111394434	1.16143	2.23679	4.7e-26	XP_022876028.1	JMT jasmonate O-methyltransferase-like=Olea europaea var. sylvestris
LOC111400591	0.404552	1.32368	0.000356904	XP_022883765.1	JMT jasmonate O-methyltransferase=Olea europaea var. sylvestris
LOC111404129	0.815378	1.75976	9.03e-14	XP_022888642.1	TPL-binding domain in jasmonate signalling=Olea europaea var. sylvestris
LOC111405660	2.54643	5.84188	2.59e-38	XP_022890420.1	APRR5 two-component response regulator-like APRR5, transcript variant X3=Olea europaea var. sylvestris
LOC111394345	1.4258	2.68663	2.37e-07	XP_022875879.1	IDM1 increased DNA methylation 1-like, transcript variant X2=Olea europaea var. sylvestris
P14 vs. P0_DOWN
Genes	log2FoldChange	FoldChange	pvalue	Gene_ID	Description
LOC111366164	-3.92406	-15.1796	1.69e-240	XP_022842625.1	LOX3.1 linoleate 13S-lipoxygenase 3-1, chloroplastic-like=Olea europaea var. sylvestris
LOC111366779	-3.11112	-8.64054	5.82e-142	XP_022843244.1	LOX3.1 linoleate 13S-lipoxygenase 3-1, chloroplastic-like=Olea europaea var. sylvestris
LOC111410046	-1.50046	-2.82933	3.67e-25	XP_022895973.1	LOX5 linoleate 9S-lipoxygenase 5=Olea europaea var. sylvestris
LOC111373883	-1.98757	-3.96568	8.68e-39	XP_022852244.1	AOS1 allene oxide synthase 1, chloroplastic-like=Olea europaea var. sylvestris
LOC111408828	-1.14365	-2.20939	4.29e-19	XP_022894376.1	AOS1 allene oxide synthase 1, chloroplastic-like=Olea europaea var. sylvestris
LOC111409949	-0.530634	-1.44456	0.00148958	XP_022895848.1	JAR1 jasmonic acid-amido synthetase JAR1-like=Olea europaea var. sylvestris
LOC111377782	-1.28972	-2.44481	1.63e-16	XP_022856678.1	JAR1 jasmonic acid-amido synthetase JAR1, transcript variant X3=Olea europaea var. sylvestris
LOC111397089	-0.631116	-1.54876	1.38e-05	XP_022879601.1	COI1b coronatine-insensitive protein homolog 1b-like, transcript variant X2=Olea europaea var. sylvestris
LOC111396626	-0.742894	-1.67353	5.32e-12	XP_022878817.1	TPL-binding domain in jasmonate signalling=Olea europaea var. sylvestris
LOC111403127	-0.569384	-1.48389	6.82e-06	XP_022887288.1	TPL-binding domain in jasmonate signalling=Olea europaea var. sylvestris
LOC111404379	-0.460917	-1.37642	0.00109877	XP_022888961.1	TPL-binding domain in jasmonate signalling=Olea europaea var. sylvestris
LOC111385123	-1.0031	-2.00431	1.29e-12	XP_022865263.1	TPL-binding domain in jasmonate signalling=Olea europaea var. sylvestris
LOC111371304	-1.80703	-3.49921	1.8e-24	XP_022848975.1	ninja-family protein 4-like=Olea europaea var. sylvestris
LOC111408702	-1.03531	-2.04955	0.00668559	XP_022894222.1	At1g21780 BTB/POZ domain-containing protein At1g21780-like=Olea europaea var. sylvestris
P28 vs. P14_UP
Genes	log2FoldChange	FoldChange	pvalue	Gene_ID	Description
LOC111392344	0.73239	1.66139	6.50142e-08	XP_022873439.1	LOX2.1 linoleate 13S-lipoxygenase 2-1, chloroplastic-like=Olea europaea var. sylvestris
LOC111393284	0.711588	1.63761	7.27283e-05	XP_022874513.1	LOX2.1 linoleate 13S-lipoxygenase 2-1, chloroplastic-like=Olea europaea var. sylvestris
LOC111369299	0.379941	1.30129	0.0110344	XP_022846527.1	LOX6 lipoxygenase 6, chloroplastic-like=Olea europaea var. sylvestris
LOC111394434	0.38627	1.30701	0.00238968	XP_022876028.1	JMT jasmonate O-methyltransferase-like=Olea europaea var. sylvestris
LOC111397089	0.623921	1.54106	6.06367e-05	XP_022879601.1	COI1b coronatine-insensitive protein homolog 1b-like, transcript variant X2=Olea europaea var. sylvestris
P28 vs. P14_DOWN
Genes	log2FoldChange	FoldChange	pvalue	Gene_ID	Description
LOC111400591	-4.67792	-25.5974	8.40213e-124	XP_022883765.1	JMT jasmonate O-methyltransferase=Olea europaea var. sylvestris
LOC111410046	-2.60264	-6.07398	1.51304e-85	XP_022895973.1	LOX5 probable linoleate 9S-lipoxygenase 5=Olea europaea var. sylvestris
LOC111386480	-1.11762	-2.16989	1.2737e-11	XP_022866715.1	LOX5 probable linoleate 9S-lipoxygenase 5=Olea europaea var. sylvestris
LOC111368968	-0.97893	-1.971	0.000791115	XP_022846226.1	LOX5 probable linoleate 9S-lipoxygenase 5=Olea europaea var. sylvestris
LOC111388392	-0.718906	-1.64593	3.44836e-05	XP_022868846.1	LOX5 probable linoleate 9S-lipoxygenase 5, transcript variant X3=Olea europaea var. sylvestris
LOC111366779	-0.991314	-1.988	3.82173e-09	XP_022843244.1	LOX3.1 linoleate 13S-lipoxygenase 3-1, chloroplastic-like=Olea europaea var. sylvestris
LOC111366164	-0.802923	-1.74463	0.000151653	XP_022842625.1	LOX3.1 linoleate 13S-lipoxygenase 3-1, chloroplastic-like=Olea europaea var. sylvestris
LOC111373883	-0.815121	-1.75945	0.000561843	XP_022852244.1	AOS allene oxide synthase 1, chloroplastic-like=Olea europaea var. sylvestris
LOC111408828	-1.73778	-3.3352	7.69472e-26	XP_022894376.1	AOS1 allene oxide synthase 1, chloroplastic-like=Olea europaea var. sylvestris
LOC111399032	-2.39335	-5.25377	6.9798e-09	XP_022881999.1	AOC allene oxide cyclase, chloroplastic-like=Olea europaea var. sylvestris
LOC111409949	-1.16384	-2.24053	4.36481e-07	XP_022895848.1	JAR1 jasmonic acid-amido synthetase JAR1-like=Olea europaea var. sylvestris
LOC111377782	-1.42303	-2.68148	2.98972e-12	XP_022856678.1	JAR1 jasmonic acid-amido synthetase JAR1, transcript variant X3=Olea europaea var. sylvestris
LOC111405469	-1.50721	-2.84261	4.34905e-09	XP_022890134.1	COI1 coronatine-insensitive protein 1-like=Olea europaea var. sylvestris
LOC111405983	-0.56444	-1.47881	0.00156321	XP_022890902.1	COI1 coronatine-insensitive protein 1-like=Olea europaea var. sylvestris
LOC111385123	-0.537344	-1.4513	0.00112425	XP_022865263.1	TPL-binding domain in jasmonate signalling=Olea europaea var. sylvestris
LOC111371304	-2.1508	-4.44073	5.79719e-26	XP_022848975.1	ninja-family protein 4-like=Olea europaea var. sylvestris
ABSCISIC ACID
P14 vs. P0_UP
Genes	log2FoldChange	FoldChange	pvalue	Gene_ID	Description
LOC111370875	2.68149	6.41519	1.52e-34	XP_022848544.1	NCED1 9-cis-epoxycarotenoid dioxygenase NCED1, chloroplastic-like=Olea europaea var. sylvestris
LOC111386602	1.55162	2.93147	3.11e-07	XP_022866840.1	NCED1 9-cis-epoxycarotenoid dioxygenase NCED1, chloroplastic-like=Olea europaea var. sylvestris
LOC111405868	0.553241	1.46738	5.04e-06	XP_022890717.1	AAO3 abscisic-aldehyde oxidase-like, transcript variant X3=Olea europaea var. sylvestris
LOC111410386	0.654258	1.57381	0.00151926	XP_022896461.1	PYL8 X2 abscisic acid receptor PYL8-like, transcript variant X2=Olea europaea var. sylvestris
LOC111411941	0.525402	1.43933	0.0127183	XP_022898402.1	PYL9 X2 abscisic acid receptor PYL9-like, transcript variant X2=Olea europaea var. sylvestris
LOC111369313	1.17444	2.25705	2.81e-05	XP_022846555.1	PP2C 14 probable protein phosphatase 2C 14=Olea europaea var. sylvestris
LOC111374716	0.257262	1.19521	0.0245286	XP_022853211.1	PP2C 7 protein phosphatase 2C 7-like, transcript variant X7=Olea europaea var. sylvestris
LOC111378689	0.477269	1.39211	2.94e-05	XP_022857686.1	PP2C 60 probable protein phosphatase 2C 60, transcript variant X2=Olea europaea var. sylvestris
LOC111397585	2.00601	4.0167	2.04e-15	XP_022880349.1	PP2C 6 probable protein phosphatase 2C 6, transcript variant X5=Olea europaea var. sylvestris
LOC111399691	0.89065	1.85401	0.000651718	XP_022882915.1	PP2C 25 probable protein phosphatase 2C 25, transcript variant X3=Olea europaea var. sylvestris
LOC111407465	0.369468	1.29188	0.00946775	XP_022892721.1	PP2C 50 probable protein phosphatase 2C 50, transcript variant X5=Olea europaea var. sylvestris
LOC111407494	0.704236	1.62928	2.03e-05	XP_022892773.1	PP2C 29 protein phosphatase 2C 29-like=Olea europaea var. sylvestris
LOC111383610	1.09009	2.12888	2.38e-10	XP_022863495.1	ABI5_4 X3 ABSCISIC ACID-INSENSITIVE 5-like protein 4, transcript variant X3=Olea europaea var. sylvestris
LOC111392268	0.481624	1.39631	0.0235597	XP_022873338.1	ABI5_2 X3 ABSCISIC ACID-INSENSITIVE 5-like protein 2, transcript variant X3=Olea europaea var. sylvestris
LOC111386018	0.96551	1.95275	1.36e-07	XP_022866230.1	bHLH-TYPE-like transcription factor ABA-INDUCIBLE bHLH-TYPE-like, transcript variant X3=Olea europaea var. sylvestris
P14 vs. P0_DOWN
Genes	log2FoldChange	FoldChange	pvalue	Gene_ID	Description
LOC111395789	-2.16909	-4.49739	1.16e-23	XP_022877706.1	NCED1 9-cis-epoxycarotenoid dioxygenase NCED1, chloroplastic-like=Olea europaea var. sylvestris
LOC111402235	-2.23902	-4.72076	2.53e-17	XP_022886168.1	NCED1 9-cis-epoxycarotenoid dioxygenase NCED1, chloroplastic-like=Olea europaea var. sylvestris
LOC111372855	-6.49316	-90.0819	7.34e-65	XP_022851036.1	PYL4 abscisic acid receptor PYL4-like=Olea europaea var. sylvestris
LOC111391952	-0.942883	-1.92237	5.02e-05	XP_022873004.1	PYL8 abscisic acid receptor PYL8-like=Olea europaea var. sylvestris
LOC111383476	-0.915062	-1.88565	2.64e-07	XP_022863355.1	PYL8 abscisic acid receptor PYL8-like=Olea europaea var. sylvestris
LOC111392557	-1.95985	-3.89023	2.54e-14	XP_022873689.1	PYL4 abscisic acid receptor PYL4-like=Olea europaea var. sylvestris
LOC111367578	-0.456617	-1.37232	0.000299503	XP_022844295.1	PP2C 27 probable protein phosphatase 2C 27=Olea europaea var. sylvestris
LOC111371482	-0.698587	-1.62291	0.000679831	XP_022849270.1	PP2C 35 probable protein phosphatase 2C 35=Olea europaea var. sylvestris
LOC111372108	-0.60544	-1.52144	0.0232431	XP_022850048.1	PP2C 8 probable protein phosphatase 2C 8, transcript variant X2=Olea europaea var. sylvestris
LOC111377088	-0.429541	-1.34681	0.000149984	XP_022855907.1	PP2C 6 probable protein phosphatase 2C 6=Olea europaea var. sylvestris
LOC111382144	-0.424666	-1.34226	0.00388112	XP_022861795.1	PP2C 35 probable protein phosphatase 2C 35, transcript variant X3=Olea europaea var. sylvestris
LOC111383876	-0.344668	-1.26986	0.00805866	XP_022863826.1	PP2C 6 probable protein phosphatase 2C 6=Olea europaea var. sylvestris
LOC111383955	-2.18909	-4.56017	3.15e-77	XP_022863920.1	PP2C 37 protein phosphatase 2C 37-like=Olea europaea var. sylvestris
LOC111384551	-0.38143	-1.30263	0.00519998	XP_022864606.1	PP2C 33 probable protein phosphatase 2C 33=Olea europaea var. sylvestris
LOC111384694	-1.12292	-2.17787	5.55e-15	XP_022864780.1	PP2C 27 probable protein phosphatase 2C 27=Olea europaea var. sylvestris
LOC111385800	-0.749486	-1.68119	3.12e-11	XP_022866012.1	PP2C 37 protein phosphatase 2C 37-like=Olea europaea var. sylvestris
LOC111386841	-0.859237	-1.81408	1.07e-13	XP_022867092.1	PP2C 27 probable protein phosphatase 2C 27, transcript variant X2=Olea europaea var. sylvestris
LOC111388887	-0.426623	-1.34408	0.01037	XP_022869480.1	PP2C 58 probable protein phosphatase 2C 58=Olea europaea var. sylvestris
LOC111393237	-1.75453	-3.37416	2.19e-13	XP_022874444.1	PP2C 4 probable protein phosphatase 2C 4=Olea europaea var. sylvestris
LOC111394437	-1.86027	-3.63076	6.24e-43	XP_022876033.1	PP2C 49 probable protein phosphatase 2C 49=Olea europaea var. sylvestris
LOC111394533	-2.29731	-4.91541	8.63e-82	XP_022876157.1	PP2C 60 probable protein phosphatase 2C 60=Olea europaea var. sylvestris
LOC111396579	-2.28557	-4.87557	1.23e-45	XP_022878748.1	PP2C 40 probable protein phosphatase 2C 40, transcript variant X3=Olea europaea var. sylvestris
LOC111398929	-5.75828	-54.1272	8.63e-117	XP_022881864.1	PP2C 65 probable protein phosphatase 2C 65=Olea europaea var. sylvestris
LOC111401235	-1.20063	-2.29839	1.04e-08	XP_022884650.1	PP2C 47 probable protein phosphatase 2C 47=Olea europaea var. sylvestris
LOC111404027	-0.820649	-1.7662	3.92e-08	XP_022888510.1	PP2C 44 probable protein phosphatase 2C 44, transcript variant X2=Olea europaea var. sylvestris
LOC111404104	-2.27683	-4.84613	3.82e-44	XP_022888608.1	PP2C 38 probable protein phosphatase 2C 38=Olea europaea var. sylvestris
LOC111410699	-0.442989	-1.35942	0.0183373	XP_022896939.1	PP2C 9 probable protein phosphatase 2C 9=Olea europaea var. sylvestris
LOC111381185	-0.553963	-1.46811	4.04e-06	XP_022860701.1	ABI5_7 ABSCISIC ACID-INSENSITIVE 5-like protein 7=Olea europaea var. sylvestris
LOC111386298	-3.89067	-14.8323	3.97e-18	XP_022866530.1	ABI5_2 X3 ABSCISIC ACID-INSENSITIVE 5-like protein 2, transcript variant X3=Olea europaea var. sylvestris
LOC111394682	-0.435193	-1.35209	0.00301631	XP_022876389.1	ABI5_6 ABSCISIC ACID-INSENSITIVE 5-like protein 6=Olea europaea var. sylvestris
LOC111410615	-0.88261	-1.84371	1.45e-13	XP_022896817.1	ABI5_7 X2 ABSCISIC ACID-INSENSITIVE 5-like protein 7, transcript variant X2=Olea europaea var. sylvestris
LOC111411924	-1.03536	-2.04962	0.000180497	XP_022898369.1	ABI5_2 ABSCISIC ACID-INSENSITIVE 5-like protein 2=Olea europaea var. sylvestris
LOC111406216	-2.71314	-6.55746	7.15e-48	XP_022891269.1	ABA4 protein ABA DEFICIENT 4, chloroplastic-like, transcript variant X2=Olea europaea var. sylvestris
LOC111401045	-0.550328	-1.46442	0.00149386	XP_022884345.1	ABA4 protein ABA DEFICIENT 4, chloroplastic-like, transcript variant X2=Olea europaea var. sylvestris
LOC111405763	-0.644519	-1.56322	0.000143882	XP_022890558.1	ARM REPEAT PROTEIN INTERACTING WITH ABF2-like, transcript variant X2=Olea europaea var. sylvestris
LOC111384917	-2.03948	-4.11096	4.79e-33	XP_022865031.1	bHLH-TYPE-like transcription factor ABA-INDUCIBLE bHLH-TYPE-like=Olea europaea var. sylvestris
LOC111395918	-0.637594	-1.55573	0.000191684	XP_022877912.1	CAR 11 X3 protein C2-DOMAIN ABA-RELATED 11, transcript variant X3=Olea europaea var. sylvestris
LOC111408760	-3.11508	-8.66427	1.91e-164	XP_022894294.1	ASR2 X2 abscisic stress-ripening protein 2-like, transcript variant X2=Olea europaea var. sylvestris
LOC111408761	-0.436486	-1.3533	0.000107617	XP_022894295.1	ASR2 abscisic stress-ripening protein 2-like=Olea europaea var. sylvestris
P28 vs. P14_UP
Genes	log2FoldChange	FoldChange	pvalue	Gene_ID	Description
LOC111409085	1.37111	2.5867	6.22546e-08	XP_022894768.1	ABA-8-OH 4 abscisic acid 8'-hydroxylase 4-like=Olea europaea var. sylvestris
LOC111408136	0.966924	1.95467	7.62367e-07	XP_022893707.1	PP2C 6 probable protein phosphatase 2C 6=Olea europaea var. sylvestris
LOC111377088	0.5924	1.50775	6.58358e-06	XP_022855907.1	PP2C 6 probable protein phosphatase 2C 6=Olea europaea var. sylvestris
LOC111402374	0.459337	1.37491	0.000473399	XP_022886383.1	PP2C 66 probable protein phosphatase 2C 66, transcript variant X2=Olea europaea var. sylvestris
LOC111391150	1.47659	2.78291	0.000664807	XP_022872066.1	PP2C 72 probable protein phosphatase 2C 72=Olea europaea var. sylvestris
LOC111374440	0.729972	1.65861	0.000858093	XP_022852875.1	PP2C 60 probable protein phosphatase 2C 60=Olea europaea var. sylvestris
LOC111386160	0.430879	1.34805	0.00184342	XP_022866380.1	PP2C 5 probable protein phosphatase 2C 5=Olea europaea var. sylvestris
LOC111375380	0.469091	1.38424	0.00527055	XP_022853963.1	PP2C 60 probable protein phosphatase 2C 60, transcript variant X2=Olea europaea var. sylvestris
LOC111382820	1.63443	3.10465	7.17241e-09	XP_022862629.1	CAR5 protein C2-DOMAIN ABA-RELATED 5-like=Olea europaea var. sylvestris
LOC111406140	0.672734	1.59409	0.000118056	XP_022891134.1	CAR7 X3 protein C2-DOMAIN ABA-RELATED 7-like, transcript variant X3=Olea europaea var. sylvestris
LOC111386018	0.417627	1.33573	0.00471934	XP_022866230.1	bHLH-TYPE-like transcription factor ABA-INDUCIBLE bHLH-TYPE-like, transcript variant X3=Olea europaea var. sylvestris
P28 vs. P14_DOWN
Genes	log2FoldChange	FoldChange	pvalue	Gene_ID	Description
LOC111370875	-3.24671	-9.49199	8.09509e-54	XP_022848544.1	NCED1 9-cis-epoxycarotenoid dioxygenase NCED1, chloroplastic-like=Olea europaea var. sylvestris
LOC111395789	-1.78518	-3.44663	1.0418e-05	XP_022877706.1	NCED1 9-cis-epoxycarotenoid dioxygenase NCED1, chloroplastic-like=Olea europaea var. sylvestris
LOC111386602	-3.29056	-9.78492	1.44527e-33	XP_022866840.1	NCED1 9-cis-epoxycarotenoid dioxygenase NCED1, chloroplastic-like=Olea europaea var. sylvestris
LOC111385923	-3.24109	-9.45509	2.73693e-62	XP_022866116.1	PYL8 abscisic acid receptor PYL8-like=Olea europaea var. sylvestris
LOC111410386	-0.727465	-1.65573	0.00518199	XP_022896461.1	PYL8 abscisic acid receptor PYL8-like, transcript variant X2=Olea europaea var. sylvestris
LOC111403265	-0.631312	-1.54897	0.00881699	XP_022887464.1	PYL4 abscisic acid receptor PYL4-like=Olea europaea var. sylvestris
LOC111367437	-2.72324	-6.60352	2.0263e-23	XP_022844074.1	ABA-8-OH 4 abscisic acid 8'-hydroxylase 4-like=Olea europaea var. sylvestris
LOC111367428	-2.6275	-6.17953	4.96286e-20	XP_022844060.1	ABA-8-OH 4 abscisic acid 8'-hydroxylase 4-like=Olea europaea var. sylvestris
LOC111401342	-0.945037	-1.92524	0.000252718	XP_022884809.1	ABA-8-OH 4 abscisic acid 8'-hydroxylase 4-like, transcript variant X4=Olea europaea var. sylvestris
LOC111367578	-0.490622	-1.40505	0.00180751	XP_022844295.1	PP2C 27 probable protein phosphatase 2C 27=Olea europaea var. sylvestris
LOC111382072	-1.11831	-2.17092	0.00237554	XP_022861706.1	PP2C 38 probable protein phosphatase 2C 38=Olea europaea var. sylvestris
LOC111388926	-0.938069	-1.91596	0.00317337	XP_022869523.1	PP2C 4 probable protein phosphatase 2C 4=Olea europaea var. sylvestris
LOC111409080	-0.797082	-1.73758	0.00471706	XP_022894756.1	PP2C 12 probable protein phosphatase 2C 12, transcript variant X2=Olea europaea var. sylvestris
LOC111389940	-0.72951	-1.65808	0.00485548	XP_022870695.1	PP2C 9 probable protein phosphatase 2C 9, transcript variant X3=Olea europaea var. sylvestris
LOC111383876	-0.414601	-1.33293	0.00486387	XP_022863826.1	PP2C 6 probable protein phosphatase 2C 6=Olea europaea var. sylvestris
LOC111401509	-0.375525	-1.29731	0.00486781	XP_022885048.1	PP2C 16 protein phosphatase 2C 16-like, transcript variant X2=Olea europaea var. sylvestris
LOC111393237	-0.892263	-1.85608	0.00732625	XP_022874444.1	PP2C 4 probable protein phosphatase 2C 4=Olea europaea var. sylvestris
LOC111407465	-0.348883	-1.27357	0.0115067	XP_022892721.1	PP2C 50 probable protein phosphatase 2C 50, transcript variant X5=Olea europaea var. sylvestris
LOC111408960	-0.360093	-1.28351	0.0116233	XP_022894589.1	PP2C 55 probable protein phosphatase 2C 55=Olea europaea var. sylvestris
LOC111381185	-1.03706	-2.05205	1.26989e-12	XP_022860701.1	ABI5_7 ABSCISIC ACID-INSENSITIVE 5-like protein 7=Olea europaea var. sylvestris
LOC111383610	-0.469774	-1.38489	0.00932566	XP_022863495.1	ABI5_4 X3 ABSCISIC ACID-INSENSITIVE 5-like protein 4, transcript variant X3=Olea europaea var. sylvestris
LOC111406921	-3.02343	-8.13098	7.77395e-12	XP_022892047.1	CAR4 protein C2-DOMAIN ABA-RELATED 4-like=Olea europaea var. sylvestris
LOC111384917	-1.2415	-2.36445	0.000735233	XP_022865031.1	bHLH-TYPE-like transcription factor ABA-INDUCIBLE bHLH-TYPE-like=Olea europaea var. sylvestris
LOC111408760	-1.12168	-2.176	5.99973e-10	XP_022894294.1	ASR2 X2 abscisic stress-ripening protein 2-like, transcript variant X2=Olea europaea var. sylvestris
ETHYLENE
P14 vs. P0_UP
Genes	log2FoldChange	FoldChange	pvalue	Gene_ID	Description
LOC111396063	1.86796	3.65017	1.3e-58	XP_022878101.1	SAM1 X2 S-adenosylmethionine synthase 1, transcript variant X2=Olea europaea var. sylvestris
LOC111409846	0.897854	1.86329	2.13e-18	XP_022895694.1	SAM1 S-adenosylmethionine synthase 1-like=Olea europaea var. sylvestris
LOC111382863	0.349233	1.27388	0.00902712	XP_022862667.1	SAM2 X2 S-adenosylmethionine synthase 2-like, transcript variant X2=Olea europaea var. sylvestris
LOC111372200	0.592304	1.50765	2.88e-08	XP_022850196.1	SAM3 X2 S-adenosylmethionine synthase 3, transcript variant X2=Olea europaea var. sylvestris
LOC111407173	1.198	2.29422	3.23e-15	XP_022892270.1	ACO 1-aminocyclopropane-1-carboxylate oxidase=Olea europaea var. sylvestris
LOC111369484	0.991729	1.98857	8.22e-05	XP_022846777.1	ACO1 1-aminocyclopropane-1-carboxylate oxidase homolog 1-like=Olea europaea var. sylvestris
LOC111390562	4.09837	17.1291	2.87e-105	XP_022871389.1	ACO 1-aminocyclopropane-1-carboxylate oxidase homolog 1-like=Olea europaea var. sylvestris
LOC111392646	1.542	2.91199	4.42e-25	XP_022873791.1	ACO11 X2 1-aminocyclopropane-1-carboxylate oxidase homolog 11-like, transcript variant X2=Olea europaea var. sylvestris
LOC111393342	0.858914	1.81367	0.000249839	XP_022874608.1	ETR2 ethylene receptor 2-like=Olea europaea var. sylvestris
LOC111374308	0.860474	1.81563	3.65e-14	XP_022852731.1	ETR1 ethylene receptor-like=Olea europaea var. sylvestris
LOC111383843	0.357615	1.28131	0.0235907	XP_022863782.1	CTR1 X6 serine/threonine-protein kinase CTR1-like, transcript variant X6=Olea europaea var. sylvestris
LOC111387870	0.581318	1.49622	1.72e-05	XP_022868235.1	EBF2 EIN3-binding F-box protein 2-like=Olea europaea var. sylvestris
LOC111409471	1.85867	3.62673	4.07e-07	XP_022895284.1	EBF2 EIN3-binding F-box protein 2-like=Olea europaea var. sylvestris
LOC111391509	0.670378	1.59149	1.29e-06	XP_022872510.1	EDR1 X2 serine/threonine-protein kinase EDR1-like, transcript variant X2=Olea europaea var. sylvestris
LOC111392889	3.06571	8.37278	2.63e-23	XP_022874066.1	ERF012 ethylene-responsive transcription factor 12-like=Olea europaea var. sylvestris
LOC111368607	3.93506	15.2957	3.39e-21	XP_022845722.1	ERF012 ethylene-responsive transcription factor 12-like=Olea europaea var. sylvestris
LOC111368854	0.632425	1.55017	0.000148408	XP_022846100.1	ERF011 ethylene-responsive transcription factor ERF011-like=Olea europaea var. sylvestris
LOC111383528	1.98153	3.94913	2.83e-16	XP_022863412.1	ERF038 ethylene-responsive transcription factor ERF038-like=Olea europaea var. sylvestris
LOC111367121	1.13088	2.18992	4.52e-06	XP_022843617.1	ERF107 ethylene-responsive transcription factor ERF107-like=Olea europaea var. sylvestris
LOC111384776	2.26304	4.80001	3.96e-64	XP_022864867.1	ERF118 ethylene-responsive transcription factor ERF118-like=Olea europaea var. sylvestris
LOC111372227	2.83282	7.12463	1.27e-17	XP_022850227.1	ABR1 ethylene-responsive transcription factor ABR1-like, transcript variant X2=Olea europaea var. sylvestris
LOC111371777	0.813073	1.75695	0.00610302	XP_022849697.1	CRF1 ethylene-responsive transcription factor CRF1-like=Olea europaea var. sylvestris
LOC111375459	1.38428	2.61041	0.000326009	XP_022854050.1	CRF2 ethylene-responsive transcription factor CRF2-like=Olea europaea var. sylvestris
LOC111366744	1.8176	3.52496	2.94e-48	XP_022843213.1	RAP2-12 ethylene-responsive transcription factor RAP2-12-like=Olea europaea var. sylvestris
LOC111393394	1.79308	3.46555	1.38e-38	XP_022874669.1	RAP2-3 ethylene-responsive transcription factor RAP2-3-like=Olea europaea var. sylvestris
LOC111382065	1.25553	2.38755	2.75e-06	XP_022861697.1	RAP2-7 ethylene-responsive transcription factor RAP2-7-like=Olea europaea var. sylvestris
LOC111407872	1.00804	2.01117	2.36e-08	XP_022893335.1	TINY ethylene-responsive transcription factor TINY-like=Olea europaea var. sylvestris
LOC111383997	1.83506	3.56787	1.52e-31	XP_022863964.1	WIN1 ethylene-responsive transcription factor WIN1-like=Olea europaea var. sylvestris
LOC111368316	1.03898	2.05478	4.38e-10	XP_022845453.1	WIN1 ethylene-responsive transcription factor WIN1-like, transcript variant X3=Olea europaea var. sylvestris
LOC111374630	1.54598	2.92003	6.95e-05	XP_022853103.1	AIL5 AP2-like ethylene-responsive transcription factor AIL5=Olea europaea var. sylvestris
LOC111390109	6.71782	105.26	5.95e-21	XP_022870872.1	ANT AP2-like ethylene-responsive transcription factor ANT=Olea europaea var. sylvestris
LOC111384308	3.63298	12.4061	2.68e-64	XP_022864341.1	ANT AP2-like ethylene-responsive transcription factor ANT, transcript variant X2=Olea europaea var. sylvestris
LOC111372046	1.39853	2.63633	7.93e-08	XP_022849967.1	ADAP AP2-like ethylene-responsive transcription factor At1g16060=Olea europaea var. sylvestris
LOC111405188	2.1575	4.46142	4.46e-27	XP_022889728.1	ADAP AP2-like ethylene-responsive transcription factor At1g16060=Olea europaea var. sylvestris
LOC111368704	1.02131	2.02976	1.74e-08	XP_022845880.1	SMOS1 AP2-like ethylene-responsive transcription factor At2g41710, transcript variant X2=Olea europaea var. sylvestris
LOC111366637	3.74538	13.4113	1.52e-19	XP_022843119.1	BBM2 AP2-like ethylene-responsive transcription factor BBM2=Olea europaea var. sylvestris
LOC111401005	0.414911	1.33322	0.00144801	XP_022884297.1	TOE3 AP2-like ethylene-responsive transcription factor TOE3, transcript variant X9=Olea europaea var. sylvestris
LOC111403648	2.31912	4.99026	4.66e-14	XP_022888000.1	MYB306 myb-related protein 306-like=Olea europaea var. sylvestris
LOC111387591	0.493288	1.40765	0.0232531	XP_022867933.1	AFP1 ninja-family protein AFP1-like=Olea europaea var. sylvestris
LOC111403314	2.64827	6.26917	7.17e-29	XP_022887534.1	AFP2 ninja-family protein AFP2-like=Olea europaea var. sylvestris
LOC111406170	1.34058	2.53252	5.28e-19	XP_022891181.1	AFP3 ninja-family protein AFP3-like=Olea europaea var. sylvestris
P14 vs. P0_DOWN
Genes	log2FoldChange	FoldChange	pvalue	Gene_ID	Description
LOC111409847	-0.446378	-1.36262	0.000120447	XP_022895695.1	SAM1 S-adenosylmethionine synthase 1-like=Olea europaea var. sylvestris
LOC111390594	-0.245729	-1.18569	0.0198384	XP_022871420.1	SAM2 S-adenosylmethionine synthase 2-like=Olea europaea var. sylvestris
LOC111403119	-0.512092	-1.42612	3.32e-06	XP_022887275.1	SAM3 X2 S-adenosylmethionine synthase 3-like, transcript variant X2=Olea europaea var. sylvestris
LOC111381563	-0.913885	-1.88411	0.00131309	XP_022861124.1	SAM3 X3 S-adenosylmethionine synthase 3-like, transcript variant X3=Olea europaea var. sylvestris
LOC111389750	-0.360331	-1.28372	0.000274253	XP_022870471.1	SAM5 S-adenosylmethionine synthase 5=Olea europaea var. sylvestris
LOC111392647	-0.520408	-1.43436	2.36e-05	XP_022873792.1	ACO 1-aminocyclopropane-1-carboxylate oxidase homolog=Olea europaea var. sylvestris
LOC111376167	-2.16097	-4.47214	4.37e-38	XP_022854875.1	ACO1 1-aminocyclopropane-1-carboxylate oxidase homolog 1-like=Olea europaea var. sylvestris
LOC111387087	-1.64118	-3.11921	2.56e-18	XP_022867370.1	ACO1 1-aminocyclopropane-1-carboxylate oxidase homolog 1-like=Olea europaea var. sylvestris
LOC111387622	-1.2135	-2.319	4.04e-17	XP_022867958.1	ACO1 1-aminocyclopropane-1-carboxylate oxidase homolog 1-like=Olea europaea var. sylvestris
LOC111392648	-0.468186	-1.38337	0.00559926	XP_022873793.1	ACO1 1-aminocyclopropane-1-carboxylate oxidase homolog 1-like=Olea europaea var. sylvestris
LOC111403217	-1.28632	-2.43904	9.39e-07	XP_022887402.1	ACO1 1-aminocyclopropane-1-carboxylate oxidase homolog 1-like=Olea europaea var. sylvestris
LOC111370660	-1.11969	-2.17301	0.00107585	XP_022848248.1	ACO 1-aminocyclopropane-1-carboxylate oxidase-like=Olea europaea var. sylvestris
LOC111380501	-2.05382	-4.15203	3.5e-13	XP_022859853.1	ACS 1-aminocyclopropane-1-carboxylate synthase-like=Olea europaea var. sylvestris
LOC111389275	-3.43144	-10.7886	2.87e-60	XP_022869957.1	ETO1 ethylene-overproduction protein 1-like=Olea europaea var. sylvestris
LOC111383903	-0.815581	-1.76001	3.19e-10	XP_022863859.1	EIN4 protein EIN4-like=Olea europaea var. sylvestris
LOC111409465	-3.46976	-11.079	1.4e-19	XP_022895279.1	CTR1 serine/threonine-protein kinase CTR1-like=Olea europaea var. sylvestris
LOC111381869	-2.95292	-7.74317	1.09e-13	XP_022861485.1	CTR1 X6 serine/threonine-protein kinase CTR1-like, transcript variant X6=Olea europaea var. sylvestris
LOC111374032	-0.523367	-1.43731	8.07e-07	XP_022852416.1	EIN2 ethylene-insensitive protein 2-like, transcript variant X9=Olea europaea var. sylvestris
LOC111369766	-1.20922	-2.31213	7.78e-28	XP_022847169.1	EIL3 X2 ETHYLENE INSENSITIVE 3-like 3 protein, transcript variant X2=Olea europaea var. sylvestris
LOC111379395	-0.642317	-1.56083	1.3e-09	XP_022858519.1	EIL3 protein ETHYLENE INSENSITIVE 3-like=Olea europaea var. sylvestris
LOC111391955	-0.525056	-1.43899	0.000320749	XP_022873008.1	EIL3 protein ETHYLENE INSENSITIVE 3-like=Olea europaea var. sylvestris
LOC111388784	-0.846097	-1.79763	6.04e-14	XP_022869357.1	EIL3 X3 protein ETHYLENE INSENSITIVE 3-like, transcript variant X3=Olea europaea var. sylvestris
LOC111401530	-0.674466	-1.59601	1.07e-09	XP_022885074.1	EIL3 X4 protein ETHYLENE INSENSITIVE 3-like, transcript variant X4=Olea europaea var. sylvestris
LOC111368180	-0.706221	-1.63153	7.26e-11	XP_022845191.1	EBF1 EIN3-binding F-box protein 1-like=Olea europaea var. sylvestris
LOC111373045	-0.561402	-1.4757	1.27e-05	XP_022851273.1	EBF1 EIN3-binding F-box protein 1-like=Olea europaea var. sylvestris
LOC111387511	-1.24437	-2.36915	2.35e-23	XP_022867839.1	EBF1 EIN3-binding F-box protein 1-like=Olea europaea var. sylvestris
LOC111407932	-1.41288	-2.66268	2.13e-11	XP_022893426.1	EBF1 X2 EIN3-binding F-box protein 1-like, transcript variant X2=Olea europaea var. sylvestris
LOC111388199	-1.07459	-2.10613	2.71e-14	XP_022868653.1	ERF001 ethylene-responsive transcription factor 1-like=Olea europaea var. sylvestris
LOC111368803	-1.2678	-2.40794	0.00150367	XP_022846029.1	ERF003 ethylene-responsive transcription factor 3-like=Olea europaea var. sylvestris
LOC111370775	-2.17358	-4.51141	1.48e-51	XP_022848405.1	ERF003 ethylene-responsive transcription factor 3-like=Olea europaea var. sylvestris
LOC111376495	-1.80332	-3.49024	1.79e-40	XP_022855225.1	ERF003 ethylene-responsive transcription factor 3-like=Olea europaea var. sylvestris
LOC111395747	-1.49131	-2.81144	4.63e-21	XP_022877649.1	ERF003 ethylene-responsive transcription factor 3-like=Olea europaea var. sylvestris
LOC111379518	-0.688146	-1.61121	8.69e-11	XP_022858676.1	ERF004 ethylene-responsive transcription factor 4-like=Olea europaea var. sylvestris
LOC111381486	-1.99026	-3.97308	2.43e-74	XP_022861038.1	ERF004 ethylene-responsive transcription factor 4-like=Olea europaea var. sylvestris
LOC111395465	-1.39678	-2.63314	1.24e-36	XP_022877236.1	ERF004 ethylene-responsive transcription factor 4-like=Olea europaea var. sylvestris
LOC111379291	-1.26765	-2.40769	1.67e-22	XP_022858417.1	ERF005 ethylene-responsive transcription factor 5-like=Olea europaea var. sylvestris
LOC111405547	-1.07658	-2.10903	1.22e-16	XP_022890260.1	ERF005 ethylene-responsive transcription factor 5-like=Olea europaea var. sylvestris
LOC111385757	-3.23087	-9.38835	1.08e-51	XP_022865941.1	ERF008 ethylene-responsive transcription factor ERF008-like=Olea europaea var. sylvestris
LOC111394504	-1.6333	-3.10221	3.58e-09	XP_022876127.1	ERF010 ethylene-responsive transcription factor ERF010-like=Olea europaea var. sylvestris
LOC111367878	-0.985202	-1.97959	0.000196359	XP_022844732.1	ERF011 ethylene-responsive transcription factor ERF011-like=Olea europaea var. sylvestris
LOC111401352	-1.64753	-3.13296	4.58e-23	XP_022884823.1	ERF011 ethylene-responsive transcription factor ERF011-like=Olea europaea var. sylvestris
LOC111404291	-2.24277	-4.73305	6.05e-73	XP_022888889.1	ERF017 ethylene-responsive transcription factor ERF017-like=Olea europaea var. sylvestris
LOC111411371	-1.8648	-3.64217	1.78e-33	XP_022897679.1	ERF017 ethylene-responsive transcription factor ERF017-like=Olea europaea var. sylvestris
LOC111368831	-5.90559	-59.9458	0	XP_022846068.1	ERF027 ethylene-responsive transcription factor ERF027-like=Olea europaea var. sylvestris
LOC111402882	-2.0859	-4.24541	6.63e-42	XP_022886965.1	ERF061 ethylene-responsive transcription factor ERF061=Olea europaea var. sylvestris
LOC111408635	-1.99665	-3.99073	6.22e-07	XP_022894144.1	ERF069 ethylene-responsive transcription factor ERF069-like=Olea europaea var. sylvestris
LOC111406366	-1.37717	-2.59758	0.000102537	XP_022891565.1	ERF071 ethylene-responsive transcription factor ERF071-like=Olea europaea var. sylvestris
LOC111406367	-1.53295	-2.89376	2.13e-06	XP_022891566.1	ERF071 ethylene-responsive transcription factor ERF071-like=Olea europaea var. sylvestris
LOC111386756	-1.46423	-2.75916	6.45e-14	XP_022866990.1	ERF104 ethylene-responsive transcription factor ERF104-like=Olea europaea var. sylvestris
LOC111386758	-1.64524	-3.12799	2.29e-18	XP_022866991.1	ERF104 ethylene-responsive transcription factor ERF104-like=Olea europaea var. sylvestris
LOC111391077	-5.54029	-46.5364	2.78e-200	XP_022871987.1	ERF110 ethylene-responsive transcription factor ERF110-like=Olea europaea var. sylvestris
LOC111396122	-2.0992	-4.2847	2.49e-21	XP_022878201.1	ERF113 ethylene-responsive transcription factor ERF113-like=Olea europaea var. sylvestris
LOC111408666	-1.81301	-3.51374	2.76e-25	XP_022894167.1	ERF113 ethylene-responsive transcription factor ERF113-like=Olea europaea var. sylvestris
LOC111381215	-0.522665	-1.43661	2.63e-05	XP_022860734.1	ERF113 X2 ethylene-responsive transcription factor ERF113-like, transcript variant X2=Olea europaea var. sylvestris
LOC111408106	-1.76873	-3.40755	6.63e-17	XP_022893661.1	ERF116 ethylene-responsive transcription factor ERF116-like=Olea europaea var. sylvestris
LOC111387814	-0.420241	-1.33815	0.000376427	XP_022868171.1	ERF118 X2 ethylene-responsive transcription factor ERF118-like, transcript variant X2=Olea europaea var. sylvestris
LOC111409375	-1.74315	-3.34766	4.48e-22	XP_022895197.1	ABR1 ethylene-responsive transcription factor ABR1-like=Olea europaea var. sylvestris
LOC111397387	-2.4602	-5.50293	1.76e-23	XP_022880057.1	ABR1 X2 ethylene-responsive transcription factor ABR1-like, transcript variant X2=Olea europaea var. sylvestris
LOC111402954	-1.45892	-2.74903	0.000640876	XP_022887053.1	CRF1 ethylene-responsive transcription factor CRF1-like=Olea europaea var. sylvestris
LOC111400879	-1.00664	-2.00923	2.92e-06	XP_022884093.1	CRF4 ethylene-responsive transcription factor CRF4-like=Olea europaea var. sylvestris
LOC111367665	-0.535197	-1.44914	0.000495685	XP_022844420.1	RAP2-12 ethylene-responsive transcription factor RAP2-12-like=Olea europaea var. sylvestris
LOC111374896	-1.14643	-2.21365	2.37e-28	XP_022853422.1	RAP2-12 X2 ethylene-responsive transcription factor RAP2-12-like, transcript variant X2=Olea europaea var. sylvestris
LOC111367521	-1.15985	-2.23434	5.28e-27	XP_022844217.1	RAP2-13 ethylene-responsive transcription factor RAP2-13-like=Olea europaea var. sylvestris
LOC111389555	-1.12209	-2.17662	1.69e-05	XP_022870250.1	RAP2-13 ethylene-responsive transcription factor RAP2-13-like=Olea europaea var. sylvestris
LOC111389556	-1.77595	-3.42464	5.83e-25	XP_022870251.1	RAP2-13 ethylene-responsive transcription factor RAP2-13-like=Olea europaea var. sylvestris
LOC111397420	-1.47675	-2.78321	3.98e-42	XP_022880107.1	RAP2-13 ethylene-responsive transcription factor RAP2-13-like=Olea europaea var. sylvestris
LOC111403560	-2.30869	-4.95434	1.71e-10	XP_022887882.1	RAP2-3 ethylene-responsive transcription factor RAP2-3-like=Olea europaea var. sylvestris
LOC111394820	-0.315197	-1.24418	0.00250751	XP_022876599.1	RAP2-4 ethylene-responsive transcription factor RAP2-4-like=Olea europaea var. sylvestris
LOC111408879	-0.914317	-1.88468	1.5e-18	XP_022894462.1	RAP2-4 ethylene-responsive transcription factor RAP2-4-like=Olea europaea var. sylvestris
LOC111366883	-2.73051	-6.63688	2.81e-29	XP_022843339.1	RAP2-9 ethylene-responsive transcription factor RAP2-9-like=Olea europaea var. sylvestris
LOC111366136	-1.96228	-3.89676	3.05e-28	XP_022842585.1	TINY ethylene-responsive transcription factor TINY-like=Olea europaea var. sylvestris
LOC111365791	-4.67718	-25.5842	5.5e-20	XP_022842081.1	WIN1 ethylene-responsive transcription factor WIN1-like=Olea europaea var. sylvestris
LOC111376876	-1.51638	-2.86072	9.19e-07	XP_022855920.1	TOE3 X5 AP2-like ethylene-responsive transcription factor TOE3, transcript variant X5=Olea europaea var. sylvestris
LOC111372452	-0.959269	-1.94432	0.0065328	XP_022850575.1	EER5 enhanced ethylene response protein 5-like=Olea europaea var. sylvestris
LOC111373540	-0.651142	-1.57041	0.0162653	XP_022851851.1	RTE1 protein REVERSION-TO-ETHYLENE SENSITIVITY1-like=Olea europaea var. sylvestris
LOC111375210	-2.10725	-4.3087	8.94e-11	XP_022853778.1	RTE1 protein REVERSION-TO-ETHYLENE SENSITIVITY1-like=Olea europaea var. sylvestris
LOC111385255	-0.819271	-1.76451	3.82e-09	XP_022865400.1	SIS8 serine/threonine-protein kinase SIS8=Olea europaea var. sylvestris
LOC111407471	-0.536635	-1.45059	0.00337878	XP_022892737.1	SIS8 X3 serine/threonine-protein kinase SIS8, transcript variant X3=Olea europaea var. sylvestris
LOC111374889	-0.565034	-1.47942	0.0011534	XP_022853415.1	EDR1 serine/threonine-protein kinase EDR1-like=Olea europaea var. sylvestris
LOC111397593	-0.809695	-1.75284	5.16e-12	XP_022880360.1	EDR1 serine/threonine-protein kinase EDR1-like=Olea europaea var. sylvestris
LOC111412167	-0.57216	-1.48675	0.0178209	XP_022898731.1	EDR1 serine/threonine-protein kinase EDR1-like, transcript variant X4=Olea europaea var. sylvestris
LOC111396978	-1.6147	-3.06248	2.8e-15	XP_022879397.1	AFP3 ninja-family protein AFP3-like=Olea europaea var. sylvestris
LOC111410023	-0.647817	-1.5668	0.00372091	XP_022895957.1	AFP3 X2 ninja-family protein AFP3-like, transcript variant X2=Olea europaea var. sylvestris
P28 vs. P14_UP
Genes	log2FoldChange	FoldChange	pvalue	Gene_ID	Description
LOC111387563	0.923281	1.89642	5.63607e-12	XP_022867907.1	SAM5 S-adenosylmethionine synthase 5-like=Olea europaea var. sylvestris
LOC111389750	0.589285	1.5045	1.03404e-05	XP_022870471.1	SAM5 S-adenosylmethionine synthase 5=Olea europaea var. sylvestris
LOC111409846	0.427265	1.34468	0.000407991	XP_022895694.1	SAM1 S-adenosylmethionine synthase 1-like=Olea europaea var. sylvestris
LOC111396063	0.596924	1.51249	0.00160398	XP_022878101.1	SAM1 X2 S-adenosylmethionine synthase 1, transcript variant X2=Olea europaea var. sylvestris
LOC111390562	0.706979	1.63238	0.00150009	XP_022871389.1	ACO 1-aminocyclopropane-1-carboxylate oxidase homolog 1-like=Olea europaea var. sylvestris
LOC111398553	3.13893	8.80872	2.10285e-06	XP_022881279.1	ACS 1-aminocyclopropane-1-carboxylate synthase-like=Olea europaea var. sylvestris
LOC111374308	0.380802	1.30207	0.00955999	XP_022852731.1	ETR1 ethylene receptor-like=Olea europaea var. sylvestris
LOC111406367	1.61958	3.07286	5.3476e-10	XP_022891566.1	ERF071 ethylene-responsive transcription factor ERF071-like=Olea europaea var. sylvestris
LOC111368854	0.950386	1.93239	1.61737e-06	XP_022846100.1	ERF011 ethylene-responsive transcription factor ERF011-like=Olea europaea var. sylvestris
LOC111383528	0.87101	1.82894	3.65102e-05	XP_022863412.1	ERF038 ethylene-responsive transcription factor ERF038-like=Olea europaea var. sylvestris
LOC111402882	0.987979	1.9834	0.000109701	XP_022886965.1	ERF061 ethylene-responsive transcription factor ERF061=Olea europaea var. sylvestris
LOC111392205	1.49994	2.82832	0.000133764	XP_022873253.1	ERF027 ethylene-responsive transcription factor ERF027-like=Olea europaea var. sylvestris
LOC111383997	0.874721	1.83365	8.29669e-05	XP_022863964.1	WIN1 ethylene-responsive transcription factor WIN1-like=Olea europaea var. sylvestris
LOC111371498	0.622068	1.53908	0.00122255	XP_022849293.1	RAP2-3 ethylene-responsive transcription factor RAP2-3-like=Olea europaea var. sylvestris
LOC111403560	1.17425	2.25676	0.00206235	XP_022887882.1	RAP2-3 ethylene-responsive transcription factor RAP2-3-like=Olea europaea var. sylvestris
LOC111369788	0.546001	1.46003	0.00902163	XP_022847201.1	APD1 ethylene-responsive transcription factor-like protein At4g13040, transcript variant X3=Olea europaea var. sylvestris
LOC111368704	0.716208	1.64286	6.84871e-06	XP_022845880.1	SMOS1 AP2-like ethylene-responsive transcription factor At2g41710, transcript variant X2=Olea europaea var. sylvestris
P28 vs. P14_DOWN
Genes	log2FoldChange	FoldChange	pvalue	Gene_ID	Description
LOC111409847	-0.363914	-1.28691	0.00808869	XP_022895695.1	SAM1 S-adenosylmethionine synthase 1-like=Olea europaea var. sylvestris
LOC111382863	-0.791881	-1.73133	5.30825e-06	XP_022862667.1	SAM2 X2 S-adenosylmethionine synthase 2-like, transcript variant X2=Olea europaea var. sylvestris
LOC111407173	-1.45563	-2.74276	2.18209e-08	XP_022892270.1	ACO 1-aminocyclopropane-1-carboxylate oxidase=Olea europaea var. sylvestris
LOC111392649	-1.73612	-3.33138	2.76158e-24	XP_022873794.1	ACO1 1-aminocyclopropane-1-carboxylate oxidase homolog 1-like=Olea europaea var. sylvestris
LOC111387087	-3.58521	-12.002	4.66909e-18	XP_022867370.1	ACO1-aminocyclopropane-1-carboxylate oxidase homolog 1-like=Olea europaea var. sylvestris
LOC111392648	-1.67689	-3.19737	1.08305e-12	XP_022873793.1	ACO1 1-aminocyclopropane-1-carboxylate oxidase homolog 1-like=Olea europaea var. sylvestris
LOC111376167	-1.165	-2.24233	1.90926e-05	XP_022854875.1	ACO1 1-aminocyclopropane-1-carboxylate oxidase homolog 1-like=Olea europaea var. sylvestris
LOC111387622	-0.920327	-1.89254	1.28879e-06	XP_022867958.1	ACO1 1-aminocyclopropane-1-carboxylate oxidase homolog 1-like=Olea europaea var. sylvestris
LOC111392647	-0.660409	-1.58053	8.58194e-05	XP_022873792.1	ACO 1-aminocyclopropane-1-carboxylate oxidase homolog=Olea europaea var. sylvestris
LOC111383012	-2.04142	-4.1165	1.27158e-06	XP_022862826.1	ACS2 1-aminocyclopropane-1-carboxylate synthase CMA101-like=Olea europaea var. sylvestris
LOC111373392	-1.56596	-2.96074	6.23107e-13	XP_022851687.1	EIN4 protein EIN4-like=Olea europaea var. sylvestris
LOC111383903	-0.522125	-1.43607	0.000734058	XP_022863859.1	EIN4 protein EIN4-like=Olea europaea var. sylvestris
LOC111385255	-0.440588	-1.35716	0.00553426	XP_022865400.1	CTR1 probable serine/threonine-protein kinase SIS8=Olea europaea var. sylvestris
LOC111374032	-0.579858	-1.4947	2.69723e-06	XP_022842585.2	EIN2 ethylene-insensitive protein 2-like, transcript variant X9=Olea europaea var. sylvestris
LOC111379395	-1.47559	-2.78096	4.28504e-23	XP_022858519.1	EIL3 protein ETHYLENE INSENSITIVE 3-like=Olea europaea var. sylvestris
LOC111403435	-0.765025	-1.6994	5.51102e-09	XP_022887714.1	EIN3 protein ETHYLENE INSENSITIVE 3-like=Olea europaea var. sylvestris
LOC111388784	-1.24136	-2.36422	2.15994e-18	XP_022869357.1	EIL3 X3 protein ETHYLENE INSENSITIVE 3-like, transcript variant X3=Olea europaea var. sylvestris
LOC111368180	-1.15366	-2.22478	3.0812e-12	XP_022845191.1	EBF1 EIN3-binding F-box protein 1-like=Olea europaea var. sylvestris
LOC111373045	-1.11583	-2.16719	5.97712e-11	XP_022851273.1	EBF1 EIN3-binding F-box protein 1-like=Olea europaea var. sylvestris
LOC111407932	-0.909281	-1.87811	0.000432653	XP_022893426.1	EBF1 X2 EIN3-binding F-box protein 1-like, transcript variant X2=Olea europaea var. sylvestris
LOC111409471	-0.848984	-1.80123	0.00308329	XP_022895284.1	EBF2 EIN3-binding F-box protein 2-like=Olea europaea var. sylvestris
LOC111387870	-1.13124	-2.19047	3.70587e-08	XP_022868235.1	EBF2 EIN3-binding F-box protein 2-like=Olea europaea var. sylvestris
LOC111387511	-1.07521	-2.10702	1.29554e-05	XP_022867839.1	EBF1 EIN3-binding F-box protein 1-like=Olea europaea var. sylvestris
LOC111412697	-0.688867	-1.61202	8.71582e-07	XP_022899388.1	EIL3 protein ETHYLENE INSENSITIVE 3-like=Olea europaea var. sylvestris
LOC111381215	-2.03657	-4.10269	1.09365e-41	XP_022860734.1	ERF113 X2 ethylene-responsive transcription factor ERF113-like, transcript variant X2=Olea europaea var. sylvestris
LOC111401352	-3.84296	-14.3498	3.24448e-26	XP_022884823.1	ERF011 ethylene-responsive transcription factor ERF011-like=Olea europaea var. sylvestris
LOC111403203	-3.76372	-13.5829	4.55136e-15	XP_022887380.1	ERF118 ethylene-responsive transcription factor ERF118-like=Olea europaea var. sylvestris
LOC111391077	-4.43059	-21.5646	5.1753e-13	XP_022871987.1	ERF118 ethylene-responsive transcription factor ERF110-like=Olea europaea var. sylvestris
LOC111405547	-0.553405	-1.46755	0.000556053	XP_022842585.11	ERF005 ethylene-responsive transcription factor 5-like=Olea europaea var. sylvestris
LOC111391878	-1.09039	-2.12931	3.69683e-12	XP_022872923.1	ERF005 ethylene-responsive transcription factor 5-like=Olea europaea var. sylvestris
LOC111379518	-0.998936	-1.99853	2.65567e-10	XP_022858676.1	ERF004 ethylene-responsive transcription factor 4-like=Olea europaea var. sylvestris
LOC111395465	-1.10758	-2.15484	2.73733e-10	XP_022877236.1	ERF004 ethylene-responsive transcription factor 4-like=Olea europaea var. sylvestris
LOC111381486	-0.615108	-1.53167	0.00288395	XP_022842585.18	ERF004 ethylene-responsive transcription factor 4-like=Olea europaea var. sylvestris
LOC111367121	-1.6822	-3.20918	3.81995e-10	XP_022843617.1	ERF107 ethylene-responsive transcription factor ERF107-like=Olea europaea var. sylvestris
LOC111388199	-0.795225	-1.73535	4.80445e-06	XP_022842585.4	ERF001 ethylene-responsive transcription factor 1-like=Olea europaea var. sylvestris
LOC111376163	-2.0103	-4.02865	5.04827e-06	XP_022842585.5	ERF095 ethylene-responsive transcription factor ERF095-like=Olea europaea var. sylvestris
LOC111368831	-1.8181	-3.52615	1.05669e-05	XP_022842585.6	ERF027 ethylene-responsive transcription factor ERF027-like=Olea europaea var. sylvestris
LOC111396122	-1.69308	-3.23345	1.22857e-05	XP_022842585.7	ERF113 ethylene-responsive transcription factor ERF113-like=Olea europaea var. sylvestris
LOC111387814	-0.70829	-1.63387	0.000132389	XP_022842585.8	ERF118 X2 ethylene-responsive transcription factor ERF118-like, transcript variant X2=Olea europaea var. sylvestris
LOC111403199	-0.935222	-1.91218	0.000199857	XP_022842585.9	ERF118 X2 ethylene-responsive transcription factor ERF118-like, transcript variant X2=Olea europaea var. sylvestris
LOC111408106	-1.14629	-2.21345	0.000356696	XP_022842585.10	ERF116 ethylene-responsive transcription factor ERF116-like=Olea europaea var. sylvestris
LOC111386758	-1.02459	-2.03439	0.00159886	XP_022842585.12	ERF104 ethylene-responsive transcription factor ERF104-like=Olea europaea var. sylvestris
LOC111405546	-0.389534	-1.30997	0.00833829	XP_022842585.13	ERF002 ethylene-responsive transcription factor 2-like=Olea europaea var. sylvestris
LOC111384776	-0.453893	-1.36973	0.00952024	XP_022842585.14	ERF118 ethylene-responsive transcription factor ERF118-like=Olea europaea var. sylvestris
LOC111386756	-0.676896	-1.5987	0.0112817	XP_022842585.15	ERF104 ethylene-responsive transcription factor ERF104-like=Olea europaea var. sylvestris
LOC111409375	-2.81572	-7.04069	1.20662e-11	XP_022895197.1	ABR1 ethylene-responsive transcription factor ABR1-like=Olea europaea var. sylvestris
LOC111384308	-0.712382	-1.63851	8.45956e-08	XP_022864341.1	ANT AP2-like ethylene-responsive transcription factor ANT, transcript variant X2=Olea europaea var. sylvestris
LOC111372227	-1.30767	-2.47541	2.28178e-07	XP_022850227.1	ABR1 ethylene-responsive transcription factor ABR1-like, transcript variant X2=Olea europaea var. sylvestris
LOC111376876	-2.00642	-4.01783	8.51508e-07	XP_022855920.1	TOE3 X5 AP2-like ethylene-responsive transcription factor TOE3, transcript variant X5=Olea europaea var. sylvestris
LOC111366136	-1.31193	-2.48273	1.96617e-06	XP_022842585.1	TINY ethylene-responsive transcription factor TINY-like=Olea europaea var. sylvestris
LOC111374889	-0.89071	-1.85409	3.21093e-06	XP_022842585.3	EDR1 serine/threonine-protein kinase EDR1-like=Olea europaea var. sylvestris
LOC111367521	-0.848212	-1.80027	7.57433e-05	XP_022842585.16	RAP2-13 ethylene-responsive transcription factor RAP2-13-like=Olea europaea var. sylvestris
LOC111366637	-0.799778	-1.74083	0.00280762	XP_022842585.17	BBM2 AP2-like ethylene-responsive transcription factor BBM2=Olea europaea var. sylvestris
LOC111374630	-0.732859	-1.66193	0.00380599	XP_022842585.19	AIL5 AP2-like ethylene-responsive transcription factor AIL5=Olea europaea var. sylvestris
LOC111401005	-0.630687	-1.5483	1.03505e-05	XP_022842585.20	TOE3 AP2-like ethylene-responsive transcription factor TOE3, transcript variant X9=Olea europaea var. sylvestris
LOC111393409	-0.516844	-1.43082	0.00624274	XP_022842585.21	APD1 ethylene-responsive transcription factor-like protein At4g13040, transcript variant X6=Olea europaea var. sylvestris
LOC111387591	-2.40825	-5.3083	9.73602e-29	XP_022842585.22	AFP1 ninja-family protein AFP1-like=Olea europaea var. sylvestris
LOC111406170	-2.15044	-4.43964	9.21251e-13	XP_022842585.23	AFP3 ninja-family protein AFP3-like=Olea europaea var. sylvestris
LOC111373820	-3.22158	-9.32805	6.70281e-11	XP_022842585.24	AFP3 ninja-family protein AFP3-like=Olea europaea var. sylvestris
LOC111396978	-1.77853	-3.43075	1.75974e-05	XP_022842585.25	AFP3 ninja-family protein AFP3-like=Olea europaea var. sylvestris
LOC111403314	-0.883155	-1.84441	3.37486e-05	XP_022842585.26	AFP2 ninja-family protein AFP2-like=Olea europaea var. sylvestris
NITRIC OXIDE
P14 vs. P0_UP
Genes	log2FoldChange	FoldChange	pvalue	Gene_ID	Description
LOC111390921	0.853689	1.80712	3.76e-06	XP_022871846.1	NOS putative nitric oxide synthase=Olea europaea var. sylvestris
LOC111368006	0.938783	1.91691	0.00446988	XP_022844933.1	NRG2 nitrate regulatory gene2 protein-like=Olea europaea var. sylvestris
LOC111374854	0.802122	1.74366	0.00825095	XP_022853369.1	NRG2 nitrate regulatory gene2 protein-like=Olea europaea var. sylvestris
LOC111376205	2.47413	5.55631	2.92e-41	XP_022854921.1	NRG2 nitrate regulatory gene2 protein-like=Olea europaea var. sylvestris
LOC111376932	1.24695	2.37338	3e-06	XP_022855714.1	NRG2 nitrate regulatory gene2 protein=Olea europaea var. sylvestris
LOC111379284	0.661733	1.58198	1.16e-05	XP_022858410.1	NRG2 nitrate regulatory gene2 protein-like=Olea europaea var. sylvestris
LOC111380056	0.624666	1.54185	0.000120358	XP_022859290.1	NRG2 nitrate regulatory gene2 protein-like=Olea europaea var. sylvestris
LOC111380057	0.561947	1.47626	2.28e-05	XP_022859291.1	NRG2 nitrate regulatory gene2 protein-like=Olea europaea var. sylvestris
LOC111383159	3.44941	10.9239	2.28e-119	XP_022863005.1	NRG2 nitrate regulatory gene2 protein-like=Olea europaea var. sylvestris
LOC111387329	1.54591	2.91987	2.37e-22	XP_022867655.1	NRG2 nitrate regulatory gene2 protein-like=Olea europaea var. sylvestris
LOC111394819	0.732833	1.6619	0.000645852	XP_022876598.1	NRG2 nitrate regulatory gene2 protein-like=Olea europaea var. sylvestris
LOC111403815	2.22863	4.6869	1.96e-24	XP_022888207.1	NRG2 X4 nitrate regulatory gene2 protein-like, transcript variant X4=Olea europaea var. sylvestris
LOC111366080	1.08359	2.1193	4.37e-09	XP_022842498.1	NRG2 X2 nitrate regulatory gene2 protein-like, transcript variant X2=Olea europaea var. sylvestris
LOC111367518	0.738032	1.6679	2.09e-06	XP_022844215.1	NRG2 X2 nitrate regulatory gene2 protein-like, transcript variant X2=Olea europaea var. sylvestris
P14 vs. P0_DOWN
Genes	log2FoldChange	FoldChange	pvalue	Gene_ID	Description
LOC111383770	-1.71223	-3.27667	2.24e-10	XP_022863688.1	NR2 nitrate reductase [NADH] 2-like=Olea europaea var. sylvestris
LOC111383771	-1.5466	-2.92128	1.97e-07	XP_022863689.1	NR2 nitrate reductase [NADH] 2-like=Olea europaea var. sylvestris
LOC111389106	-2.91475	-7.54095	4.23e-68	XP_022869728.1	NR2 nitrate reductase [NADH] 2-like=Olea europaea var. sylvestris
LOC111403601	-1.27914	-2.42695	4.19e-06	XP_022887934.1	NR2 nitrate reductase [NADH] 2-like=Olea europaea var. sylvestris
LOC111376356	-0.548946	-1.46302	0.00426115	XP_022855081.1	NRT2.5 high affinity nitrate transporter 2.5-like=Olea europaea var. sylvestris
LOC111381300	-0.73253	-1.66155	2.6e-12	XP_022860840.1	NRT2.7 high affinity nitrate transporter 2.7=Olea europaea var. sylvestris
LOC111398833	-4.16232	-17.9054	1.76e-53	XP_022881712.1	NRT2.5 high affinity nitrate transporter 2.5-like, transcript variant X2=Olea europaea var. sylvestris
LOC111407626	-1.05328	-2.07524	0.00625712	XP_022893008.1	NRT3.1 high-affinity nitrate transporter 3.1-like=Olea europaea var. sylvestris
LOC111396828	-0.986749	-1.98171	7.14e-12	XP_022879129.1	NRG2 nitrate regulatory gene2 protein-like=Olea europaea var. sylvestris
LOC111402049	-0.886254	-1.84837	1.26e-07	XP_022885859.1	NRG2 nitrate regulatory gene2 protein-like=Olea europaea var. sylvestris
LOC111370489	-0.852312	-1.80539	5.76e-08	XP_022847976.1	NRG2 X2 nitrate regulatory gene2 protein-like, transcript variant X2=Olea europaea var. sylvestris
LOC111388758	-0.734169	-1.66344	8.44e-10	XP_022869322.1	NRG2 X3 nitrate regulatory gene2 protein-like, transcript variant X3=Olea europaea var. sylvestris
LOC111412317	-0.537908	-1.45187	0.000486963	XP_022898967.1	NRG2 X4 nitrate regulatory gene2 protein-like, transcript variant X4=Olea europaea var. sylvestris
P28 vs. P14_UP
Genes	log2FoldChange	FoldChange	pvalue	Gene_ID	Description
LOC111390921	0.573779	1.48842	0.000602985	XP_022871846.1	NOS putative nitric oxide synthase=Olea europaea var. sylvestris
LOC111383159	0.994033	1.99174	6.35999e-09	XP_022863005.1	NRG2 nitrate regulatory gene2 protein-like=Olea europaea var. sylvestris
LOC111376205	0.817996	1.76296	3.97101e-08	XP_022854921.1	NRG2 nitrate regulatory gene2 protein-like=Olea europaea var. sylvestris
LOC111380056	0.581151	1.49604	6.40542e-06	XP_022859290.1	NRG2 nitrate regulatory gene2 protein-like=Olea europaea var. sylvestris
LOC111387329	0.470222	1.38532	0.000750273	XP_022867655.1	NRG2 nitrate regulatory gene2 protein-like=Olea europaea var. sylvestris
LOC111376932	0.599001	1.51467	0.00257597	XP_022855714.1	NRG2 nitrate regulatory gene2 protein=Olea europaea var. sylvestris
LOC111403815	0.54068	1.45466	0.0119881	XP_022888207.1	NRG2 X4 nitrate regulatory gene2 protein-like, transcript variant X4=Olea europaea var. sylvestris
LOC111372264	1.03132	2.04389	0.000546721	XP_022850275.1	NRG2 X3 nitrate regulatory gene2 protein-like, transcript variant X3=Olea europaea var. sylvestris
P28 vs. P14_DOWN
Genes	log2FoldChange	FoldChange	pvalue	Gene_ID	Description
LOC111389106	-2.00346	-4.0096	3.71662e-11	XP_022869728.1	NR2 nitrate reductase [NADH] 2-like=Olea europaea var. sylvestris
LOC111383771	-2.64204	-6.24212	2.95538e-09	XP_022863689.1	NR2 nitrate reductase [NADH] 2-like=Olea europaea var. sylvestris
LOC111381300	-4.53495	-23.1823	4.98865e-128	XP_022860840.1	NRT2.7 high affinity nitrate transporter 2.7=Olea europaea var. sylvestris
LOC111376356	-3.20691	-9.23371	5.54506e-21	XP_022855081.1	NRT2.5 high affinity nitrate transporter 2.5-like=Olea europaea var. sylvestris
LOC111412338	-1.0587	-2.08306	8.342e-06	XP_022898992.1	NRG2 nitrate regulatory gene2 protein-like=Olea europaea var. sylvestris
POLYAMINES
P14 vs. P0_UP
Genes	log2FoldChange	FoldChange	pvalue	Gene_ID	Description
LOC111391770	5.10793	34.4858	3.59e-32	XP_022872797.1	ADC Arginine decarboxylase=Olea europaea var. sylvestris
LOC111412228	0.34588	1.27093	0.0114127	XP_022898836.1	OTCase ornithine carbamoyltransferase, chloroplastic-like=Olea europaea var. sylvestris
LOC111386574	0.446615	1.36284	0.00350074	XP_022866807.1	OAT aminotransferase, mitochondrial=Olea europaea var. sylvestris
LOC111393035	4.04685	16.5281	1.23e-18	XP_022874205.1	ACAULIS5 thermospermine synthase ACAULIS5-like=Olea europaea var. sylvestris
LOC111396130	1.13541	2.19681	1.44e-11	XP_022878209.1	SPDS spermidine synthase=Olea europaea var. sylvestris
LOC111397477	1.23582	2.35516	1.09e-10	XP_022880195.1	SPDS spermidine synthase=Olea europaea var. sylvestris
LOC111388222	1.3897	2.62024	3.51e-06	XP_022868679.1	SPDS probable polyamine aminopropyl transferase, transcript variant X2=Olea europaea var. sylvestris
LOC111403793	3.3076	9.90118	3e-22	XP_022888181.1	SHT spermidine hydroxycinnamoyl transferase-like=Olea europaea var. sylvestris
LOC111404589	1.03941	2.05539	2.16e-11	XP_022889145.1	SHT spermidine hydroxycinnamoyl transferase-like=Olea europaea var. sylvestris
LOC111404591	5.31285	39.7492	1.32e-164	XP_022889146.1	SHT spermidine hydroxycinnamoyl transferase-like=Olea europaea var. sylvestris
LOC111366748	1.99917	3.9977	1.25e-12	XP_022843215.1	PUT4 probable polyamine transporter At3g13620=Olea europaea var. sylvestris
LOC111375112	1.61885	3.0713	1.9e-05	XP_022853669.1	PUT2 probable polyamine transporter At1g31830=Olea europaea var. sylvestris
LOC111392008	1.6798	3.20383	8.48e-16	XP_022873066.1	PUT2 probable polyamine transporter At1g31830, transcript variant X2=Olea europaea var. sylvestris
LOC111394526	0.692852	1.61648	0.00342565	XP_022876148.1	PUT2 probable polyamine transporter At1g31830=Olea europaea var. sylvestris
LOC111400605	1.78731	3.4517	9.32e-09	XP_022883777.1	PAO2 probable polyamine oxidase 2=Olea europaea var. sylvestris
LOC111387474	0.634203	1.55208	2.84e-06	XP_022867797.1	PAO5 probable polyamine oxidase 5=Olea europaea var. sylvestris
P14 vs. P0_DOWN
Genes	log2FoldChange	FoldChange	pvalue	Gene_ID	Description
LOC111403786	-2.21424	-4.64038	2.22e-17	XP_022888176.1	ADC Arginine decarboxylase=Olea europaea var. sylvestris
LOC111411752	-1.50141	-2.83119	2.01e-25		ADC Arginine decarboxylase=Olea europaea var. sylvestris
LOC111391544	-0.550181	-1.46427	1.53e-06	XP_022872548.1	SAMDC S-adenosylmethionine decarboxylase proenzyme-like=Olea europaea var. sylvestris
LOC111396244	-0.666415	-1.58712	2.7e-06	XP_022878379.1	SAMDC S-adenosylmethionine decarboxylase proenzyme-like=Olea europaea var. sylvestris
LOC111404633	-0.525101	-1.43903	0.00854071	XP_022889182.1	SAMDC S-adenosylmethionine decarboxylase proenzyme-like=Olea europaea var. sylvestris
LOC111397580	-0.842346	-1.79296	0.00153418	XP_022880342.1	ACAULIS5 thermospermine synthase ACAULIS5-like=Olea europaea var. sylvestris
LOC111373552	-3.49761	-11.295	5.35e-41	XP_022851867.1	ACAULIS5 thermospermine synthase ACAULIS5-like=Olea europaea var. sylvestris
LOC111390174	-1.36328	-2.57269	2e-05	XP_022870949.1	ACAULIS5 thermospermine synthase ACAULIS5-like=Olea europaea var. sylvestris
LOC111411392	-4.98784	-31.7315	3.32e-38	XP_022897695.1	PAO1 polyamine oxidase 1-like=Olea europaea var. sylvestris
LOC111390976	-1.23815	-2.35897	1.19e-17	XP_022871877.1	PAO2 probable polyamine oxidase 2=Olea europaea var. sylvestris
LOC111372349	-2.48541	-5.59992	2.08e-22	XP_022850415.1	PAO2 probable polyamine oxidase 2=Olea europaea var. sylvestris
LOC111378096	-1.72457	-3.30481	1.52e-37	XP_022857034.1	PAO4 probable polyamine oxidase 4, transcript variant X3=Olea europaea var. sylvestris
P28 vs. P14_UP
Genes	log2FoldChange	FoldChange	pvalue	Gene_ID	Description
LOC111374496	0.438545	1.35524	0.0100294	XP_022852937.1	AOase X5 acetylornithine deacetylase, transcript variant X5=Olea europaea var. sylvestris
LOC111370933	0.549937	1.46402	0.00307069	XP_022848608.1	OTCase ornithine carbamoyltransferase, chloroplastic-like=Olea europaea var. sylvestris
LOC111394586	0.540613	1.45459	0.00171727	XP_022876253.1	ADC1 arginine decarboxylase 1, chloroplastic-like=Olea europaea var. sylvestris
LOC111404633	0.785749	1.72399	0.000883164	XP_022889182.1	SAMDC S-adenosylmethionine decarboxylase proenzyme-like=Olea europaea var. sylvestris
LOC111373552	1.8953	3.71999	3.23227e-07	XP_022851867.1	ACAULIS5 thermospermine synthase ACAULIS5-like=Olea europaea var. sylvestris
LOC111397580	0.867892	1.82499	0.0101314	XP_022880342.1	ACAULIS5 thermospermine synthase ACAULIS5-like=Olea europaea var. sylvestris
LOC111388222	0.990171	1.98642	1.21056e-06	XP_022868679.1	SPDS polyamine aminopropyl transferase, transcript variant X2=Olea europaea var. sylvestris
LOC111403793	1.58272	2.99535	5.12671e-13	XP_022888181.1	SHT spermidine hydroxycinnamoyl transferase-like=Olea europaea var. sylvestris
LOC111404592	1.13699	2.19921	0.00761649	XP_022889147.1	SHT spermidine hydroxycinnamoyl transferase-like=Olea europaea var. sylvestris
P28 vs. P14_DOWN
Genes	log2FoldChange	FoldChange	pvalue	Gene_ID	Description
LOC111380585	-1.26819	-2.40859	1.30588e-08	XP_022859959.1	ADC arginine decarboxylase-like=Olea europaea var. sylvestris
LOC111396244	-0.706175	-1.63147	8.56286e-05	XP_022878379.1	SAMDC S-adenosylmethionine decarboxylase proenzyme-like=Olea europaea var. sylvestris
LOC111410097	-0.570071	-1.4846	0.00054288	XP_022896062.1	ADC arginine decarboxylase-like=Olea europaea var. sylvestris
LOC111380387	-1.32433	-2.50416	8.23068e-12	XP_022859703.1	SHT spermidine hydroxycinnamoyl transferase-like=Olea europaea var. sylvestris
STRIGOLACTONES
P14 vs. P0_UP
Genes	log2FoldChange	FoldChange	pvalue	Gene_ID	Description
LOC111379344	0.829915	1.77758	0.000334389	XP_022858472.1	DAD2 probable strigolactone esterase DAD2=Olea europaea var. sylvestris
P14 vs. P0_DOWN
Genes	log2FoldChange	FoldChange	pvalue	Gene_ID	Description
LOC111365644	-1.95351	-3.87316	7.73e-42	XP_022841952.1	D14 strigolactone esterase D14-like=Olea europaea var. sylvestris
LOC111389244	-7.42186	-171.475	4.2e-191	XP_022869903.1	D14 strigolactone esterase D14-like=Olea europaea var. sylvestris
LOC111390114	-2.28994	-4.89035	1.72e-40	XP_022870880.1	DAD2 probable strigolactone esterase DAD2=Olea europaea var. sylvestris
LOC111403717	-0.585004	-1.50004	0.000759738	XP_022888088.1	SMXL2 protein SUPPRESSOR OF MAX2 1, transcript variant X2=Olea europaea var. sylvestris
LOC111365990	-1.43659	-2.70681	1.73e-20	XP_022842360.1	SMXL2 protein SUPPRESSOR OF MAX2 1-like=Olea europaea var. sylvestris
P28 vs. P14_DOWN
Genes	log2FoldChange	FoldChange	pvalue	Gene_ID	Description
LOC111379344	-2.27144	-4.82804	8.14835e-26	XP_022858472.1	DAD2 probable strigolactone esterase DAD2=Olea europaea var. sylvestris
LOC111390114	-2.40739	-5.30513	4.76454e-16	XP_022870880.1	DAD2 probable strigolactone esterase DAD2=Olea europaea var. sylvestris
LOC111391510	-1.03076	-2.0431	4.46954e-09	XP_022872511.1	MAX2 F-box/LRR-repeat MAX2 homolog A-like=Olea europaea var. sylvestris
LOC111403717	-0.950937	-1.93313	1.37309e-07	XP_022888088.1	SMXL2 protein SUPPRESSOR OF MAX2 1, transcript variant X2=Olea europaea var. sylvestris
LOC111365990	-0.712306	-1.63842	0.0010843	XP_022842360.1	SMXL2 protein SUPPRESSOR OF MAX2 1-like=Olea europaea var. sylvestris
LOC111368013	-1.92979	-3.80999	4.46462e-11	XP_022844945.1	SMXL2 protein SUPPRESSOR OF MAX2 1-like=Olea europaea var. sylvestris
BRASSINOSTEROIDS
P14 vs. P0_UP
Genes	log2FoldChange	FoldChange	pvalue	Gene_ID	Description
LOC111387104	2.65569	6.30149	5.19e-44	XP_022867392.1	BRI1 BRASSINOSTEROID INSENSITIVE 1-associated receptor kinase 1-like=Olea europaea var. sylvestris
LOC111407279	1.93371	3.82035	4.84e-13	XP_022892434.1	BRI1 brassinosteroid LRR receptor kinase-like, transcript variant X3=Olea europaea var. sylvestris
LOC111394691	0.519985	1.43394	0.000235709	XP_022876402.1	BRI1 BRASSINOSTEROID INSENSITIVE 1-associated receptor kinase 1-like, transcript variant X2=Olea europaea var. sylvestris
LOC111383668	0.238548	1.1798	0.0259131	XP_022863567.1	PP2A serine/threonine protein phosphatase 2A 57 kDa regulatory subunit B' kappa isoform-like=Olea europaea var. sylvestris
LOC111398717	1.35775	2.56284	2.75e-22	XP_022881539.1	PP2A serine/threonine protein phosphatase 2A 57 kDa regulatory subunit B' kappa isoform-like, transcript variant X3=Olea europaea var. sylvestris
LOC111401963	0.754643	1.68721	0.00204615	XP_022885729.1	PP2A serine/threonine protein phosphatase 2A 57 kDa regulatory subunit B' theta isoform-like, transcript variant X2=Olea europaea var. sylvestris
LOC111391080	1.1691	2.24872	1.76e-11	XP_022871990.1	SERK2 somatic embryogenesis receptor kinase 2-like=Olea europaea var. sylvestris
LOC111393102	2.37479	5.1866	7.66e-39	XP_022874269.1	SERK2 somatic embryogenesis receptor kinase 2-like=Olea europaea var. sylvestris
LOC111368674	0.624977	1.54219	0.0204175	XP_022845826.1	BES1/BZR1 homolog protein 4-like, transcript variant X2=Olea europaea var. sylvestris
LOC111387771	1.10425	2.14987	0.000812879	XP_022868128.1	BES1/BZR1=Olea europaea var. sylvestris
LOC111389245	1.37078	2.58611	1.06e-18	XP_022869905.1	BES1/BZR1 homolog protein 4-like=Olea europaea var. sylvestris
LOC111401172	1.88736	3.69957	6.46e-16	XP_022884565.1	BPG2 GTP-binding protein BRASSINAZOLE INSENSITIVE PALE GREEN 2, chloroplastic, transcript variant X2=Olea europaea var. sylvestris
LOC111387238	1.25537	2.38728	4.62e-10	XP_022867547.1	BPG2 GTP-binding protein BRASSINAZOLE INSENSITIVE PALE GREEN 2, chloroplastic, transcript variant X4=Olea europaea var. sylvestris
P14 vs. P0_DOWN
Genes	log2FoldChange	FoldChange	pvalue	Gene_ID	Description
LOC111366170	-1.06099	-2.08636	1.79e-17	XP_022842635.1	PP2A serine/threonine protein phosphatase 2A 57 kDa regulatory subunit B' beta isoform-like=Olea europaea var. sylvestris
LOC111373276	-1.03056	-2.04282	5.66e-14	XP_022851550.1	PP2A serine/threonine protein phosphatase 2A 57 kDa regulatory subunit B' beta isoform=Olea europaea var. sylvestris
LOC111409287	-0.589484	-1.50471	0.000237995	XP_022895078.1	PP2A serine/threonine protein phosphatase 2A 57 kDa regulatory subunit B' theta isoform-like, transcript variant X2=Olea europaea var. sylvestris
LOC111398868	-0.600309	-1.51604	0.0137944	XP_022881779.1	PP2A serine/threonine protein phosphatase 2A 57 kDa regulatory subunit B' theta isoform-like, transcript variant X2=Olea europaea var. sylvestris
LOC111406268	-0.299795	-1.23097	0.0267187	XP_022891362.1	PP2A serine/threonine protein phosphatase 2A 55 kDa regulatory subunit B beta isoform-like, transcript variant X2=Olea europaea var. sylvestris
LOC111402252	-0.749279	-1.68095	0.000807967	XP_022886187.1	BES1/BZR1 homolog protein 4-like=Olea europaea var. sylvestris
P28 vs. P14_UP
Genes	log2FoldChange	FoldChange	pvalue	Gene_ID	Description
LOC111387104	0.577953	1.49273	6.1191e-05	XP_022867392.1	BRI1 BRASSINOSTEROID INSENSITIVE 1-associated receptor kinase 1-like=Olea europaea var. sylvestris
LOC111383668	0.412991	1.33144	0.00153217	XP_022863567.1	PP2A serine/threonine protein phosphatase 2A 57 kDa regulatory subunit B' kappa isoform-like=Olea europaea var. sylvestris
LOC111366644	0.389326	1.30978	0.0111544	XP_022843124.1	PP2A serine/threonine protein phosphatase 2A 55 kDa regulatory subunit B beta isoform-like=Olea europaea var. sylvestris
P28 vs. P14_DOWN
Genes	log2FoldChange	FoldChange	pvalue	Gene_ID	Description
LOC111407279	-1.63649	-3.10908	1.63615e-08	XP_022892434.1	BRI1 brassinosteroid LRR receptor kinase-like, transcript variant X3=Olea europaea var. sylvestris
LOC111401963	-1.45466	-2.74093	7.71529e-12	XP_022885729.1	PP2A serine/threonine protein phosphatase 2A 57 kDa regulatory subunit B' theta isoform-like, transcript variant X2=Olea europaea var. sylvestris
LOC111398868	-0.569244	-1.48375	0.00698715	XP_022881779.1	PP2A serine/threonine protein phosphatase 2A 57 kDa regulatory subunit B' theta isoform-like, transcript variant X2=Olea europaea var. sylvestris
LOC111408959	-0.589444	-1.50467	0.00141751	XP_022894588.1	BES1/BZR1 protein BRASSINAZOLE-RESISTANT 1-like=Olea europaea var. sylvestris
LOC111389245	-0.417405	-1.33552	0.00211328	XP_022869905.1	BES1/BZR1 homolog protein 4-like=Olea europaea var. sylvestris
LOC111401172	-0.57076	-1.48531	0.00404612	XP_022884565.1	BPG2 GTP-binding protein BRASSINAZOLE INSENSITIVE PALE GREEN 2, chloroplastic, transcript variant X2=Olea europaea var. sylvestris
