# Supplementary material for: Characterization of Transcriptome Dynamics during Early Fruit Development in Olive (Olea europaea L.)
Source: Int J Mol Sci. 2023 Jan 4;24(2):961. doi: 10.3390/ijms24020961 (PMC9864153; doi:10.3390/ijms24020961)
Supplement: Supplementary file 1 [file ijms-24-00961-s001.zip › Table S15_PEP_sub.xlsx]

## Sheet: Table S15
Supplementary Table S15. Subtilisin-like proteases and peptide-signaling-related genes induced or repressed in the dividing fruits at 14 (P14) versus the flowers at anthesis stage (P0), and the expanding fruits at 28 (P28) DPA versus the dividing fruits at 14 (P14) during early olive fruit development.
P14 vs. P0_UP
Genes	log2FoldChange	FoldChange	p value	Gene_ID	Description
LOC111380164	4.17407	18.0518	1.24e-28	XP_022859421.1	subtilisin-like protease SBT1.1=Olea europaea var. sylvestris
LOC111403579	2.78954	6.9141	2.27e-131	XP_022887944.1	subtilisin-like protease SBT1.5 =Olea europaea var. sylvestris
LOC111368699	2.50829	5.68945	2.38e-69	XP_022845874.1	subtilisin-like protease SBT2.2 =Olea europaea var. sylvestris
LOC111397017	2.10379	4.29837	1.45e-52	XP_022879447.1	subtilisin-like protease SBT1.7 =Olea europaea var. sylvestris
LOC111408800	2.09002	4.25754	5.96e-31	XP_022894339.1	subtilisin-like protease SBT1.9 =Olea europaea var. sylvestris
LOC111403829	2.01772	4.04943	2e-10	XP_022888224.1	subtilisin-like protease SBT2.5 =Olea europaea var. sylvestris
LOC111367731	1.51905	2.86602	3.47e-22	XP_022844531.1	subtilisin-like protease SBT3.5=Olea europaea var. sylvestris
LOC111403831	1.42397	2.68323	9.86e-06	XP_022888225.1	subtilisin-like protease SBT2.5 =Olea europaea var. sylvestris
LOC111403915	1.39429	2.62859	2.31e-36	XP_022888348.1	subtilisin-like protease SBT1.3 =Olea europaea var. sylvestris
LOC111411447	1.31862	2.49428	1.18e-31	XP_022897749.1	subtilisin-like protease SBT1.8 =Olea europaea var. sylvestris
LOC111410115	1.20772	2.30972	3e-23	XP_022896089.1	subtilisin-like protease SBT1.6=Olea europaea var. sylvestris
LOC111397286	1.14618	2.21327	3.91e-17	XP_ 022879899.1	subtilisin-like protease SBT1.9 =Olea europaea var. sylvestris
LOC111366809	1.13466	2.19567	4.4e-10	XP_ 022843272.1	subtilisin-like protease SBT1.7 =Olea europaea var. sylvestris
LOC111372582	0.950432	1.93245	4.19e-06	XP_ 022850724.1	subtilisin-like protease SBT1.6 =Olea europaea var. sylvestris
LOC111407513	0.846751	1.79845	0.000302303	XP_ 022892810.1	subtilisin-like protease SBT1.2 =Olea europaea var. sylvestris
LOC111397287	0.835803	1.78485	0.000385703	XP_ 022879901.1	subtilisin-like protease SBT1.9 =Olea europaea var. sylvestris
LOC111383057	0.774161	1.7102	0.0196282	XP_ 022862886.1	subtilisin-like protease SBT5.3 =Olea europaea var. sylvestris
LOC111374885	0.619672	1.53653	4.79e-09	XP_ 022853412.1	subtilisin-like protease SBT1.6 =Olea europaea var. sylvestris
LOC111368621	0.296464	1.22813	0.00301455	XP_ 022845741.1	subtilisin-like protease SBT1.8 =Olea europaea var. sylvestris
LOC111377909	3.21806	9.30535	1.48e-44	XP_022856830.1	leucine-rich repeat receptor-like protein kinase TDR =Olea europaea var. sylvestris
LOC111412020	1.95836	3.88621	1.18e-24	XP_022898524.1	putative phytosulfokines 6 (PSK6)=Olea europaea var. sylvestris
LOC111391687	1.72687	3.31008	1.92e-16	XP_022872700.1	leucine-rich repeat receptor-like serine/threonine-protein kinase BAM1 =Olea europaea var. sylvestris
LOC111383022	1.56051	2.94958	5.86e-20	XP_022862844.1	leucine-rich repeat receptor-like protein kinase TDR =Olea europaea var. sylvestris
LOC111410856	1.5179	2.86375	4.44e-41	XP_022897200.1	leucine-rich repeat receptor-like serine/threonine-protein kinase BAM1 =Olea europaea var. sylvestris
LOC111396050	1.49803	2.82457	2.75e-06	XP_022878088.1	receptor-like protein kinase HSL1=Olea europaea var. sylvestris
LOC111375576	1.46169	2.75431	4.58e-10	XP_022854181.1	leucine-rich repeat receptor-like protein CLAVATA2 (CLV2) =Olea europaea var. sylvestris
LOC111381865	1.39031	2.62135	2.55e-18	XP_022861481.1	leucine-richrepeat receptor-like serine/threonine-protein kinase BAM3 =Olea europaea var. sylvestris
LOC111388919	1.37384	2.59159	2.69e-14	XP_022869517.1	receptor-like protein kinase HAIKU2 =Olea europaea var. sylvestris
LOC111405568	1.32805	2.51063	6.66e-13	XP_022890282.1	LRR receptor-like serine/threonine-protein kinase GSO2 =Olea europaea var. sylvestris
LOC111370593	1.29122	2.44735	9.6e-21	XP_022848151.1	receptor-like protein kinase HSL1=Olea europaea var. sylvestris
LOC111390627	1.24438	2.36916	5.57e-11	XP_022871479.1	leucine-rich repeat receptor-like protein kinase TDR =Olea europaea var. sylvestris
LOC111404195	1.20877	2.31141	1.84e-05	XP_022888732.1	leucine-rich repeat receptor-like protein kinase TDR =Olea europaea var. sylvestris
LOC111382819	0.999161	1.99884	1.28e-15	XP_022862628.1	leucine-rich repeat receptor-like serine/threonine-protein kinase BAM1 =Olea europaea var. sylvestris
LOC111384807	0.980415	1.97303	0.00330642	XP_022864902.1	leucine-rich repeat receptor-like serine/threonine-protein kinase At1g17230 =Olea europaea var. sylvestris
LOC111398732	0.904705	1.87216	0.0103992	XP_022881560.1	LRR receptor-like serine/threonine-protein kinase GSO1 =Olea europaea var. sylvestris
LOC111409824	0.90064	1.86689	0.00454252	XP_022895664.1	leucine-rich repeat receptor-like serine/threonine-protein kinase BAM3 =Olea europaea var. sylvestris
LOC111386822	0.824774	1.77126	1.76e-05	XP_022867066.1	leucine-rich repeat receptor-like protein kinase TDR =Olea europaea var. sylvestris
LOC111401029	0.59464	1.5101	0.0137586	XP_022884330.1	LRR receptor-like serine/threonine-protein kinase HSL2 =Olea europaea var. sylvestris
LOC111375618	0.337973	1.26398	0.0111793	XP_022854237.1	leucine-rich repeat receptor-like serine/threonine-protein kinase BAM3 =Olea europaea var. sylvestris
LOC111381100	3.59691	12.0998	1.95e-20	XP_022860590.1	cysteine-rich receptor-like protein kinase 25 (CRK25)=Olea europaea var. sylvestris
LOC111386022	3.46577	11.0485	5.23e-14	XP_022866219.1	cysteine-rich receptor-like protein kinase 15 (CRK15) =Olea europaea var. sylvestris
LOC111386021	3.46075	11.0101	1.09e-13	XP_022866217.1	cysteine-rich receptor-like protein kinase 26 (CRK26) =Olea europaea var. sylvestris
LOC111403389	1.01598	2.02228	1.24e-09	XP_022887649.1	cysteine-rich receptor-like protein kinase 2 (CRK2) =Olea europaea var. sylvestris
LOC111402144	0.997992	1.99722	1.89e-16	XP_022886051.1	cysteine-rich receptor-like protein kinase 2 (CRK2) =Olea europaea var. sylvestris
LOC111368691	0.972423	1.96213	2.14e-08	XP_022845861.1	cysteine-rich receptor-like protein kinase 25 (CRK25) =Olea europaea var. sylvestris
LOC111390863	0.860925	1.8162	2.31e-06	XP_022871762.1	protein RALF-like 24 (RALF24)=Olea europaea var. sylvestris
LOC111392780	0.785743	1.72398	7.78e-05	XP_022873944.1	cysteine-rich receptor-like protein kinase 25 (CRK25) =Olea europaea var. sylvestris
LOC111403386	0.528703	1.44263	0.00402756	XP_022887646.1	cysteine-rich receptor-like protein kinase 2 (CRK2) =Olea europaea var. sylvestris
LOC111372640	0.282513	1.21631	0.0274003	XP_022850792.1	receptor-like protein kinase FERONIA =Olea europaea var. sylvestris
LOC111386717	4.70054	26.0018	4.51e-19	XP_022866950.1	leucine-rich repeat receptor protein kinase EMS1 =Olea europaea var. sylvestris
LOC111384431	4.35178	20.4182	7.93e-20	XP_022864474.1	cysteine-rich receptor-like protein kinase 29 (CRK29) =Olea europaea var. sylvestris
P14 vs. P0_DOWN
Genes	log2FoldChange	FoldChange	p value	Gene_ID	Description
LOC111399703	-4.61145	-24.4448	4.21e-163	XP_022882931.1	subtilisin-like protease SBT4.15 =Olea europaea var. sylvestris
LOC111409644	-2.09524	-4.27297	1.49e-86	XP_022895442.1	subtilisin-like protease SBT1.7 =Olea europaea var. sylvestris
LOC111372971	-1.14607	-2.2131	6.48e-09	XP_022851182.1	subtilisin-like protease SBT1.2=Olea europaea var. sylvestris
LOC111402276	-1.04659	-2.06565	7.54e-24	XP_022886218.1	subtilisin-like protease SBT1.4 =Olea europaea var. sylvestris
LOC111389318	-0.849859	-1.80232	1.19e-16	XP_022870004.1	subtilisin-like protease SBT1.7 =Olea europaea var. sylvestris
LOC111401229	-0.512522	-1.42654	4.52e-06	XP_022884642.1	subtilisin-like protease SBT3.5 =Olea europaea var. sylvestris
LOC111387773	-0.391085	-1.31138	0.000235017	XP_022868130.1	subtilisin-like protease SBT1.4 =Olea europaea var. sylvestris
LOC111410688	-4.86207	-29.0822	1.08e-140	XP_022896919.1	phytosulfokines-like (PSK) =Olea europaea var. sylvestris
LOC111372920	-2.1967	-4.58429	3.72e-11	XP_022851116.1	putative phytosulfokines 6 (PSK6) =Olea europaea var. sylvestris
LOC111380730	-2.00644	-4.01789	1.85e-56	XP_022860131.1	probable leucine-rich repeat receptor-like protein kinase At2g33170 =Olea europaea var. sylvestris
LOC111375443	-1.47784	-2.78531	8.19e-28	XP_022854039.1	leucine-rich repeat receptor-like serine/threonine-protein kinase At1g17230 =Olea europaea var. sylvestris
LOC111369898	-1.21629	-2.32349	1.62e-18	XP_022847381.1	LRR receptor-like serine/threonine-protein kinase GSO1 =Olea europaea var. sylvestris
LOC111367605	-1.18188	-2.26873	1.46e-10	XP_022844336.1	receptor protein-tyrosine kinase CEPR1-like =Olea europaea var. sylvestris
LOC111397375	-1.07641	-2.10879	6.96e-07	XP_022880041.1	receptor protein kinase CLAVATA1-like (CLV1) =Olea europaea var. sylvestris
LOC111401367	-1.00839	-2.01167	3.05e-07	XP_022884838.1	receptor protein-tyrosine kinase CEPR1-like =Olea europaea var. sylvestris
LOC111373583	-0.929555	-1.90469	8.55e-05	XP_022851902.1	CLAVATA3/ESR (CLE)-related protein TDIF-like (TDIF) =Olea europaea var. sylvestris
LOC111393632	-0.911844	-1.88145	2.6e-05	XP_022875035.1	probable leucine-rich repeat receptor-like protein kinase At2g33170 =Olea europaea var. sylvestris
LOC111401824	-0.833855	-1.78244	0.000398327	XP_022885515.1	LRR receptor-like serine/threonine-protein kinase GSO1 =Olea europaea var. sylvestris
LOC111369439	-0.716008	-1.64263	0.000320734	XP_022846722.1	putative phytosulfokines 6 (PSK6) =Olea europaea var. sylvestris
LOC111372588	-0.702041	-1.6268	0.0137113	XP_022850728.1	LRR receptor-like serine/threonine-protein kinase GSO2 = Olea europaea var. sylvestris
LOC111401022	-0.617134	-1.53383	0.00541075	XP_022884320.1	phytosulfokines 3-like (PSK3) =Olea europaea var. sylvestris
LOC111366328	-6.07046	-67.2034	1.15e-223	XP_022842839.1	pollen receptor-like kinase 1 (PRK1) =Olea europaea var. sylvestris
LOC111396460	-5.97785	-63.0248	2.39e-176	XP_022878660.1	protein RALF-like 19 (RALFL19) =Olea europaea var. sylvestris
LOC111396463	-5.71783	-52.6308	3.04e-229	XP_022878663.1	protein RALF-like 19 (RALFL19) =Olea europaea var. sylvestris
LOC111402717	-5.64315	-49.9754	1.62e-209	XP_022886831.1	pollen receptor-like kinase 1 (PRK1) =Olea europaea var. sylvestris
LOC111369803	-5.26898	-38.5587	4.32e-122	XP_022847235.1	pollen receptor-like kinase 4 (PRK4) =Olea europaea var. sylvestris
LOC111409662	-5.238	-37.7395	1.67e-142	XP_022895452.1	pollen receptor-like kinase 3 (PRK3) =Olea europaea var. sylvestris
LOC111372561	-4.86234	-29.0878	2.05e-154	XP_022850696.1	pollen receptor-like kinase 3 (PRK3) =Olea europaea var. sylvestris
LOC111394967	-4.69522	-25.9062	9.7e-26	XP_022876772.1	rapid alkalinization factor-like (RALF) =Olea europaea var. sylvestris
LOC111394269	-4.21421	-18.5611	1.28e-60	XP_022875794.1	protein RALF-like 19 (RALF19) =Olea europaea var. sylvestris
LOC111382577	-2.54905	-5.85249	7.85e-52	XP_022862364.1	rapid alkalinization factor-like (RALF) =Olea europaea var. sylvestris
LOC111389588	-2.23744	-4.71561	6.27e-78	XP_022870287.1	rapid alkalinization factor (RALF) =Olea europaea var. sylvestris
LOC111403022	-2.03315	-4.09297	3.91e-25	XP_022887135.1	receptor-like protein kinase FERONIA=Olea europaea var. sylvestris
LOC111368310	-1.72214	-3.29925	6.46e-17	XP_022845311.1	cysteine-rich receptor-like protein kinase 25 (CRK25)=Olea europaea var. sylvestris
LOC111372642	-1.39528	-2.63039	5.76e-05	XP_022850793.1	receptor-like protein kinase FERONIA =Olea europaea var. sylvestris
LOC111368721	-1.20867	-2.31125	2.41e-13	XP_022845902.1	cysteine-rich receptor-like protein kinase 29 (CRK29) =Olea europaea var. sylvestris
LOC111374777	-0.832983	-1.78136	1.06e-14	XP_022853283.1	receptor-like protein kinase FERONIA =Olea europaea var. sylvestris
LOC111380312	-0.576234	-1.49095	6.21e-08	XP_022859605.1	cysteine-rich receptor-like protein kinase 10 (CRK10) =Olea europaea var. sylvestris
LOC111367074	-0.468431	-1.3836	0.000741685	XP_022843543.1	cysteine-rich receptor-like protein kinase 42 (CRK42) =Olea europaea var. sylvestris
LOC111374096	-4.62887	-24.7417	2.22e-13	XP_022852497.1	LRR receptor-like serine/threonine-protein kinase GSO1 =Olea europaea var. sylvestris
LOC111402396	-4.45442	-21.9237	2.38e-26	XP_022886428.1	subtilisin-like protease SBT5.4 =Olea europaea var. sylvestris
P28 vs. P14_UP
Genes	log2FoldChange	FoldChange	p value	Gene_ID	Description
LOC111375971	2.38701	5.23071	2.04408e-10	XP_022854658.1	subtilisin-like protease SBT1.5 =Olea europaea var. sylvestris
LOC111374920	1.86794	3.65011	1.42694e-25	XP_022853451.1	subtilisin-like protease SBT3.6 =Olea europaea var. sylvestris
LOC111380164	1.48501	2.7992	4.9202e-14	XP_022859421.1	subtilisin-like protease SBT1.1 =Olea europaea var. sylvestris
LOC111366809	1.30318	2.46772	1.40541e-18	XP_022843272.1	subtilisin-like protease SBT1.7 =Olea europaea var. sylvestris
LOC111374885	0.896727	1.86184	9.03824e-13	XP_022853412.1	subtilisin-like protease SBT1.6 =Olea europaea var. sylvestris
LOC111397286	0.869601	1.82716	7.96588e-08	XP_022879899.1	subtilisin-like protease SBT1.9 =Olea europaea var. sylvestris
LOC111411447	0.82921	1.77671	1.69354e-11	XP_022897749.1	subtilisin-like protease SBT1.8 =Olea europaea var. sylvestris
LOC111403579	0.70741	1.63287	9.9938e-09	XP_022887944.1	subtilisin-like protease SBT1.5 =Olea europaea var. sylvestris
LOC111408800	0.679475	1.60156	0.00245001	XP_022894339.1	subtilisin-like protease SBT1.9=Olea europaea var. sylvestris
LOC111368621	0.557629	1.47185	2.7827e-05	XP_022845741.1	subtilisin-like protease SBT1.8 =Olea europaea var. sylvestris
LOC111403915	0.532131	1.44606	2.41387e-05	XP_022888348.1	subtilisin-like protease SBT1.3=Olea europaea var. sylvestris
LOC111410115	0.479232	1.394	0.000144385	XP_022896089.1	subtilisin-like protease SBT1.6 =Olea europaea var. sylvestris
LOC111366066	0.454948	1.37073	0.00855775	XP_022842485.1	subtilisin-like protease SBT2.5 =Olea europaea var. sylvestris
LOC111412020	1.44865	2.72953	1.97284e-10	XP_022898524.1	putative phytosulfokines 6 (PSK6) =Olea europaea var. sylvestris
LOC111377909	1.0224	2.0313	1.39345e-08	XP_022856830.1	leucine-rich repeat receptor-like protein kinase TDR =Olea europaea var. sylvestris
LOC111383022	0.592659	1.50802	0.00205077	XP_022862844.1	leucine-rich repeat receptor-like protein kinase TDR =Olea europaea var. sylvestris
LOC111398260	1.56285	2.95437	0.000310333	XP_022880957.1	receptor-like protein kinase FERONIA =Olea europaea var. sylvestris
LOC111404922	1.14647	2.21371	3.05077e-05	XP_022889413.1	rapid alkalinization factor-like (RALF) =Olea europaea var. sylvestris
P28 vs. P14_DOWN
Genes	log2FoldChange	FoldChange	p value	Gene_ID	Description
LOC111409395	-2.92567	-7.59827	2.6211e-58	XP_ 022895215.1	subtilisin-like protease SBT1.9 =Olea europaea var. sylvestris
LOC111367731	-2.67588	-6.39029	9.78057e-50	XP_022844531.1	subtilisin-like protease SBT3.5 =Olea europaea var. sylvestris
LOC111373695	-0.910031	-1.87909	3.16381e-06	XP_ 022852030.1	subtilisin-like protease SBT5.6 =Olea europaea var. sylvestris
LOC111389318	-0.820033	-1.76545	1.48594e-09	XP_ 022870004.1	subtilisin-like protease SBT1.7 =Olea europaea var. sylvestris
LOC111387773	-0.511757	-1.42579	6.80701e-05	XP_ 022868130.1	subtilisin-like protease SBT1.4 =Olea europaea var. sylvestris
LOC111401229	-0.436364	-1.35319	0.00295969	XP_ 022884642.1	subtilisin-like protease SBT3.5 =Olea europaea var. sylvestris
LOC111409644	-0.373596	-1.29558	0.0112532	XP_ 022895442.1	subtilisin-like protease SBT1.7=Olea europaea var. sylvestris
LOC111369439	-3.65307	-12.5801	7.67527e-32	XP_022846722.1	putative phytosulfokines 6 (PSK6) =Olea europaea var. sylvestris
LOC111397375	-2.81694	-7.04668	8.36387e-12	XP_022880041.1	receptor protein kinase CLAVATA1-like (CLV1) =Olea europaea var. sylvestris
LOC111369479	-2.81063	-7.0159	1.77573e-27	XP_022846765.1	receptor-like protein kinase HAIKU2 =Olea europaea var. sylvestris
LOC111401367	-2.35107	-5.10202	4.27471e-16	XP_022884838.1	receptor protein-tyrosine kinase CEPR1-like =Olea europaea var. sylvestris
LOC111367605	-2.06005	-4.17002	2.18069e-13	XP_022844336.1	receptor protein-tyrosine kinase CEPR1-like =Olea europaea var. sylvestris
LOC111367262	-2.02763	-4.07734	5.06867e-06	XP_022843802.1	phytosulfokines-like (PSK) =Olea europaea var. sylvestris
LOC111410688	-1.90549	-3.74637	1.61774e-09	XP_022896919.1	phytosulfokines-like (PSK) =Olea europaea var. sylvestris
LOC111401824	-1.83976	-3.57951	2.88774e-07	XP_022885515.1	LRR receptor-like serine/threonine-protein kinase GSO1 =Olea europaea var. sylvestris
LOC111373583	-1.77047	-3.41164	5.62258e-07	XP_022851902.1	CLAVATA3/ESR (CLE)-related protein TDIF-like (TDIF) =Olea europaea var. sylvestris
LOC111401368	-1.72858	-3.31402	4.45121e-29	XP_022884839.1	receptor-like protein kinase HAIKU2 =Olea europaea var. sylvestris
LOC111388919	-1.53202	-2.89191	1.96592e-08	XP_022869517.1	receptor-like protein kinase HAIKU2 =Olea europaea var. sylvestris
LOC111375443	-1.47369	-2.7773	1.22072e-11	XP_022854039.1	leucine-rich repeat receptor-like serine/threonine-protein kinase At1g17230 =Olea europaea var. sylvestris
LOC111396050	-1.34368	-2.53797	5.67797e-05	XP_022878088.1	receptor-like protein kinase HSL1 =Olea europaea var. sylvestris
LOC111401823	-1.20294	-2.30209	5.15399e-05	XP_022885512.1	LRR receptor-like serine/threonine-protein kinase GSO1 =Olea europaea var. sylvestris
LOC111398674	-1.14636	-2.21355	1.04984e-16	XP_022881465.1	receptor-like protein kinase HSL1 =Olea europaea var. sylvestris
LOC111370841	-1.11378	-2.16412	6.14702e-09	XP_022848503.1	receptor-like protein kinase HSL1 =Olea europaea var. sylvestris
LOC111384807	-1.01868	-2.02607	0.00127661	XP_022864902.1	leucine-rich repeat receptor-like serine/threonine-protein kinase At1g17230 =Olea europaea var. sylvestris
LOC111405568	-0.991598	-1.98839	4.61923e-08	XP_022890282.1	LRR receptor-like serine/threonine-protein kinase GSO2 =Olea europaea var. sylvestris
LOC111392161	-0.904775	-1.87225	3.82715e-05	XP_022873195.1	receptor protein kinase CLAVATA1-like (CLV1) =Olea europaea var. sylvestris
LOC111386822	-0.649048	-1.56813	0.000192421	XP_022867066.1	leucine-rich repeat receptor-like protein kinase TDR =Olea europaea var. sylvestris
LOC111380730	-0.534791	-1.44873	0.00165027	XP_022860131.1	probable leucine-rich repeat receptor-like protein kinase At2g33170 =Olea europaea var. sylvestris
LOC111369898	-0.508145	-1.42222	0.000250973	XP_022847381.1	LRR receptor-like serine/threonine-protein kinase GSO1 =Olea europaea var. sylvestris
LOC111381865	-0.492515	-1.4069	0.00180612	XP_022861481.1	leucine-rich repeat receptor-like serine/threonine-protein kinase BAM3 =Olea europaea var. sylvestris
LOC111394269	-6.2759	-77.4881	4.13275e-81	XP_022875794.1	protein RALF-like 19 (RALF19) =Olea europaea var. sylvestris
LOC111386022	-4.10258	-17.1791	1.35278e-19	XP_022866219.1	cysteine-rich receptor-like protein kinase 15 (CRK15) =Olea europaea var. sylvestris
LOC111396463	-3.24768	-9.4984	2.30256e-31	XP_022878663.1	protein RALF-like 19 (RALF19) =Olea europaea var. sylvestris
LOC111402717	-3.10809	-8.62243	1.84802e-15	XP_022886831.1	pollen receptor-like kinase 1 (PRK1) =Olea europaea var. sylvestris
LOC111369803	-2.47172	-5.54704	1.14881e-09	XP_022847235.1	pollen receptor-like kinase 4 (PRK4) =Olea europaea var. sylvestris
LOC111403387	-2.16525	-4.48543	1.94365e-10	XP_022887648.1	cysteine-rich receptor-like protein kinase 2 (CRK2) =Olea europaea var. sylvestris
LOC111366328	-2.04031	-4.11335	8.39998e-10	XP_022842839.1	pollen receptor-like kinase 1 (PRK1) =Olea europaea var. sylvestris
LOC111368309	-1.9398	-3.83653	6.14311e-09	XP_022845310.1	cysteine-rich receptor-like protein kinase 25 (CRK25) =Olea europaea var. sylvestris
LOC111368721	-1.91624	-3.77438	6.49665e-10	XP_022845902.1	cysteine-rich receptor-like protein kinase 29 (CRK29) =Olea europaea var. sylvestris
LOC111380312	-1.47927	-2.78808	3.85795e-26	XP_022859605.1	cysteine-rich receptor-like protein kinase 10 (CRK10) =Olea europaea var. sylvestris
LOC111372640	-1.28952	-2.44446	1.60536e-16	XP_022850792.1	receptor-like protein kinase FERONIA =Olea europaea var. sylvestris
LOC111368310	-1.22856	-2.34333	0.000330049	XP_022845311.1	cysteine-rich receptor-like protein kinase 25 (CRK25) =Olea europaea var. sylvestris
LOC111392780	-1.11798	-2.17043	3.2951e-08	XP_022873944.1	cysteine-rich receptor-like protein kinase 25 (CRK25) =Olea europaea var. sylvestris
LOC111372561	-1.00122	-2.00169	0.00203271	XP_022850696.1	pollen receptor-like kinase 3 (PRK3) =Olea europaea var. sylvestris
LOC111402144	-0.362165	-1.28535	0.00708694	XP_022886051.1	cysteine-rich receptor-like protein kinase 2 (CRK2)=Olea europaea var. sylvestris
LOC111394967	-6.82979	-113.756	1.81647e-13	XP_022876772.1	rapid alkalinization factor-like (RALF) =Olea europaea var. sylvestris
LOC111399703	-6.09597	-68.402	9.27506e-18	XP_ 022882931.1	subtilisin-like protease SBT4.15 =Olea europaea var. sylvestris
LOC111381100	-5.42771	-43.0432	6.56504e-30	XP_022860590.1	cysteine-rich receptor-like protein kinase 25 (CRK25) =Olea europaea var. sylvestris
LOC111384431	-5.27051	-38.5995	6.47204e-27	XP_022864474.1	cysteine-rich receptor-like protein kinase 29 (CRK29) =Olea europaea var. sylvestris
LOC111398732	-4.31821	-19.9485	5.87893e-16	XP_022881560.1	LRR receptor-like serine/threonine-protein kinase GSO1 =Olea europaea var. sylvestris
