# Supplementary material for: Characterization of Transcriptome Dynamics during Early Fruit Development in Olive (Olea europaea L.)
Source: Int J Mol Sci. 2023 Jan 4;24(2):961. doi: 10.3390/ijms24020961 (PMC9864153; doi:10.3390/ijms24020961)
Supplement: Supplementary file 1 [file ijms-24-00961-s001.zip › Table S16_protesases.xlsx]

## Sheet: Table S16
Supplementary Table S16. Proteases genes induced or repressed in the dividing fruits at 14 (P14) versus the flowers at anthesis stage (P0), and the expanding fruits at 28 (P28) DPA versus the dividing fruits at 14 (P14) during early olive fruit development.
Genes	Gene_ID	description	Organism	pfam	Interpro
LOC111410787	XP_022897081.1	aspartic_proteinase_A1-like	Olive	PF00026:Eukaryotic_aspartyl_protease//PF03489:Saposin-like_type_B,_region_2//PF05184:Saposin-like_type_B,_region_1
LOC111367856	XP_022844702.1	aspartic_proteinase_Asp1,_transcript_variant_X4	Olive	PF14541:Xylanase_inhibitor_C-terminal//PF14543:Xylanase_inhibitor_N-terminal	IPR011016:Zinc finger, RING-CH-type//IPR001841:Zinc finger, RING-type//IPR013083:Zinc finger, RING/FYVE/PHD-type
LOC111383425		aspartic_proteinase_Asp1-like	Olive		IPR001925:Porin, eukaryotic type//IPR023614:Porin domain superfamily
LOC111394357	XP_022875893.1	aspartic_proteinase_Asp1-like	Olive	PF14541:Xylanase_inhibitor_C-terminal//PF14543:Xylanase_inhibitor_N-terminal	IPR021109:Aspartic peptidase domain superfamily//IPR001969:Aspartic peptidase, active site//IPR033121:Peptidase family A1 domain//IPR001461:Aspartic peptidase A1 family
LOC111399011	XP_022881974.1	aspartic_proteinase_CDR1-like	Olive	PF14541:Xylanase_inhibitor_C-terminal//PF14543:Xylanase_inhibitor_N-terminal
LOC111411359	XP_022897667.1	aspartic_proteinase_CDR1-like	Olive	PF14543:Xylanase_inhibitor_N-terminal//PF14541:Xylanase_inhibitor_C-terminal	IPR021109:Aspartic peptidase domain superfamily//IPR033121:Peptidase family A1 domain//IPR034161:Pepsin-like domain, plant
LOC111411360	XP_022897668.1	aspartic_proteinase_CDR1-like	Olive	PF14541:Xylanase_inhibitor_C-terminal//PF14543:Xylanase_inhibitor_N-terminal	IPR021109:Aspartic peptidase domain superfamily//IPR034161:Pepsin-like domain, plant//IPR033121:Peptidase family A1 domain
LOC111399011	XP_022881974.1	aspartic_proteinase_CDR1-like	Olive	PF14541:Xylanase_inhibitor_C-terminal//PF14543:Xylanase_inhibitor_N-terminal	IPR021109:Aspartic peptidase domain superfamily//IPR034161:Pepsin-like domain, plant//IPR033121:Peptidase family A1 domain
LOC111394745	XP_022876485.1	aspartic_proteinase_NANA,_chloroplast-like	Olive	PF14541:Xylanase_inhibitor_C-terminal//PF14543:Xylanase_inhibitor_N-terminal	IPR001471:AP2/ERF domain//IPR016177:DNA-binding domain superfamily//IPR036955:AP2/ERF domain superfamily
LOC111398173	XP_022880876.1	aspartic_proteinase_NANA,_chloroplast-like	Olive	PF14541:Xylanase_inhibitor_C-terminal//PF14543:Xylanase_inhibitor_N-terminal	IPR009069:Cysteine alpha-hairpin motif superfamily
LOC111396273	XP_022878425.1	aspartic_proteinase_NANA,_chloroplast-like	Olive	PF14541:Xylanase_inhibitor_C-terminal//PF14543:Xylanase_inhibitor_N-terminal
LOC111382257	XP_022861939.1	aspartic_proteinase_NANA,_chloroplast-like	Olive	PF14541:Xylanase_inhibitor_C-terminal//PF14543:Xylanase_inhibitor_N-terminal	IPR000571:Zinc finger, CCCH-type//IPR013083:Zinc finger, RING/FYVE/PHD-type//IPR036855:Zinc finger, CCCH-type superfamily//IPR001841:Zinc finger, RING-type//IPR017907:Zinc finger, RING-type, conserved site
LOC111395876	XP_022877845.1	aspartic_proteinase_NANA,_chloroplast-like	Olive	PF14541:Xylanase_inhibitor_C-terminal//PF14543:Xylanase_inhibitor_N-terminal	IPR020683:Ankyrin repeat-containing domain//IPR002110:Ankyrin repeat//IPR036770:Ankyrin repeat-containing domain superfamily
LOC111396273	XP_022878425.1	aspartic_proteinase_NANA,_chloroplast-like	Olive	PF14541:Xylanase_inhibitor_C-terminal//PF14543:Xylanase_inhibitor_N-terminal	IPR001461:Aspartic peptidase A1 family//IPR034161:Pepsin-like domain, plant//IPR021109:Aspartic peptidase domain superfamily//IPR033121:Peptidase family A1 domain
LOC111394745	XP_022876485.1	aspartic_proteinase_NANA,_chloroplast-like	Olive	PF14541:Xylanase_inhibitor_C-terminal//PF14543:Xylanase_inhibitor_N-terminal	IPR021109:Aspartic peptidase domain superfamily//IPR001969:Aspartic peptidase, active site//IPR033121:Peptidase family A1 domain//IPR034161:Pepsin-like domain, plant//IPR001461:Aspartic peptidase A1 family
LOC111409153	XP_022894886.1	aspartic_proteinase_nepenthesin-1	Olive	PF14541:Xylanase_inhibitor_C-terminal//PF14543:Xylanase_inhibitor_N-terminal	IPR036093:NAC domain superfamily//IPR003441:NAC domain
LOC111382190	XP_022861870.1	aspartic_proteinase_oryzasin-1-like,_transcript_variant_X2	Olive	PF00026:Eukaryotic_aspartyl_protease//PF03489:Saposin-like_type_B,_region_2//PF05184:Saposin-like_type_B,_region_1	IPR011009:Protein kinase-like domain superfamily//IPR017441:Protein kinase, ATP binding site//IPR000719:Protein kinase domain//IPR008271:Serine/threonine-protein kinase, active site
LOC111367555	XP_022844259.1	aspartic_proteinase_PCS1-like	Olive	PF14541:Xylanase_inhibitor_C-terminal//PF14543:Xylanase_inhibitor_N-terminal
LOC111385663	XP_022865851.1	aspartic_proteinase_PCS1-like	Olive	PF14541:Xylanase_inhibitor_C-terminal//PF14543:Xylanase_inhibitor_N-terminal	IPR029058:Alpha/Beta hydrolase fold
LOC111401202	XP_022884599.1	aspartic_proteinase_PCS1-like	Olive	PF14543:Xylanase_inhibitor_N-terminal//PF14541:Xylanase_inhibitor_C-terminal	IPR019762:Dynamin, GTPase region, conserved site//IPR022812:Dynamin superfamily//IPR027417:P-loop containing nucleoside triphosphate hydrolase//IPR001401:Dynamin, GTPase domain//IPR020850:GTPase effector domain//IPR030381:Dynamin-type guanine nucleotide-binding (G) domain
LOC111397165	XP_022879694.1	aspartic_proteinase_PCS1-like	Olive	PF14543:Xylanase_inhibitor_N-terminal//PF14541:Xylanase_inhibitor_C-terminal	IPR001810:F-box domain//IPR036047:F-box-like domain superfamily
LOC111401202	XP_022884599.1	aspartic_proteinase_PCS1-like	Olive	PF14543:Xylanase_inhibitor_N-terminal//PF14541:Xylanase_inhibitor_C-terminal	IPR034161:Pepsin-like domain, plant//IPR021109:Aspartic peptidase domain superfamily//IPR001969:Aspartic peptidase, active site//IPR001461:Aspartic peptidase A1 family//IPR033121:Peptidase family A1 domain
LOC111403188	XP_022887363.1	aspartic_proteinase_PCS1-like	Olive	PF14543:Xylanase_inhibitor_N-terminal//PF14541:Xylanase_inhibitor_C-terminal	IPR021109:Aspartic peptidase domain superfamily//IPR034161:Pepsin-like domain, plant//IPR033121:Peptidase family A1 domain//IPR001969:Aspartic peptidase, active site//IPR001461:Aspartic peptidase A1 family
LOC111385663	XP_022865851.1	aspartic_proteinase_PCS1-like	Olive	PF14541:Xylanase_inhibitor_C-terminal//PF14543:Xylanase_inhibitor_N-terminal	IPR021109:Aspartic peptidase domain superfamily//IPR001461:Aspartic peptidase A1 family//IPR033121:Peptidase family A1 domain//IPR034161:Pepsin-like domain, plant//IPR001969:Aspartic peptidase, active site
LOC111367555	XP_022844259.1	aspartic_proteinase_PCS1-like	Olive	PF14541:Xylanase_inhibitor_C-terminal//PF14543:Xylanase_inhibitor_N-terminal	IPR033121:Peptidase family A1 domain//IPR021109:Aspartic peptidase domain superfamily//IPR001461:Aspartic peptidase A1 family//IPR034161:Pepsin-like domain, plant//IPR001969:Aspartic peptidase, active site
LOC111389388	XP_022870077.1	aspartic_proteinase-like	Olive	PF05184:Saposin-like_type_B,_region_1//PF00026:Eukaryotic_aspartyl_protease//PF03489:Saposin-like_type_B,_region_2
LOC111408893	XP_022894490.1	aspartic_proteinase-like_protein_1	Olive	PF14541:Xylanase_inhibitor_C-terminal//PF14543:Xylanase_inhibitor_N-terminal
LOC111408060	XP_022893593.1	aspartic_proteinase-like_protein_1	Olive	PF14541:Xylanase_inhibitor_C-terminal//PF14543:Xylanase_inhibitor_N-terminal	IPR004342:EXS, C-terminal
LOC111408893	XP_022894490.1	aspartic_proteinase-like_protein_1	Olive	PF14541:Xylanase_inhibitor_C-terminal//PF14543:Xylanase_inhibitor_N-terminal	IPR033121:Peptidase family A1 domain//IPR034164:Pepsin-like domain//IPR021109:Aspartic peptidase domain superfamily//IPR001461:Aspartic peptidase A1 family
LOC111367625	XP_022844368.1	aspartic_proteinase-like_protein_1,_transcript_variant_X2	Olive	PF14541:Xylanase_inhibitor_C-terminal//PF14543:Xylanase_inhibitor_N-terminal
LOC111384567	XP_022864630.1	aspartic_proteinase-like_protein_2	Olive	PF14541:Xylanase_inhibitor_C-terminal//PF14543:Xylanase_inhibitor_N-terminal
LOC111403130	XP_022887294.1	aspartic_proteinase-like_protein_2	Olive	PF14541:Xylanase_inhibitor_C-terminal//PF14543:Xylanase_inhibitor_N-terminal	IPR002048:EF-hand domain//IPR011992:EF-hand domain pair//IPR018247:EF-Hand 1, calcium-binding site
LOC111383296	XP_022863146.1	aspartic_proteinase-like_protein_2	Olive	PF14541:Xylanase_inhibitor_C-terminal//PF14543:Xylanase_inhibitor_N-terminal
LOC111386042	XP_022866241.1	aspartic_proteinase-like_protein_2	Olive	PF14543:Xylanase_inhibitor_N-terminal	IPR001214:SET domain
LOC111374677	XP_022853186.1	aspartic_proteinase-like_protein_2	Olive	PF14543:Xylanase_inhibitor_N-terminal	IPR029063:S-adenosyl-L-methionine-dependent methyltransferase//IPR037163:Spermidine synthase, tetramerisation domain superfamily//IPR030374:Polyamine biosynthesis domain
LOC111407617	XP_022893001.1	aspartic_proteinase-like_protein_2	Olive	PF14543:Xylanase_inhibitor_N-terminal//PF14541:Xylanase_inhibitor_C-terminal	IPR036400:Cytochrome b5-like heme/steroid binding domain superfamily//IPR001199:Cytochrome b5-like heme/steroid binding domain//IPR012171:Fatty acid desaturase
LOC111380017	XP_022859245.1	aspartic_proteinase-like_protein_2	Olive	PF14543:Xylanase_inhibitor_N-terminal//PF14541:Xylanase_inhibitor_C-terminal	IPR001128:Cytochrome P450//IPR017972:Cytochrome P450, conserved site//IPR002401:Cytochrome P450, E-class, group I//IPR036396:Cytochrome P450 superfamily
LOC111384668	XP_022864752.1	aspartic_proteinase-like_protein_2	Olive	PF14543:Xylanase_inhibitor_N-terminal//PF14541:Xylanase_inhibitor_C-terminal	IPR006502:Protein of unknown function PDDEXK-like
LOC111376582	XP_022855321.1	aspartic_proteinase-like_protein_2,_transcript_variant_X2	Olive	PF14543:Xylanase_inhibitor_N-terminal	IPR036457:PPM-type phosphatase domain superfamily//IPR001932:PPM-type phosphatase domain//IPR000222:PPM-type phosphatase, divalent cation binding
LOC111403494	XP_022887789.1	aspartic_proteinase-like_protein_2,_transcript_variant_X2	Olive	PF14543:Xylanase_inhibitor_N-terminal	IPR016024:Armadillo-type fold//IPR014877:Exportin-1, C-terminal//IPR011989:Armadillo-like helical
LOC111372506	XP_022850623.1	aspartic_proteinase-like_protein_2,_transcript_variant_X2	Olive	PF14543:Xylanase_inhibitor_N-terminal//PF14541:Xylanase_inhibitor_C-terminal
LOC111400381	XP_022883569.1	aspartic_proteinase-like_protein_2,_transcript_variant_X2	Olive	PF14543:Xylanase_inhibitor_N-terminal//PF14541:Xylanase_inhibitor_C-terminal	IPR001461:Aspartic peptidase A1 family//IPR034161:Pepsin-like domain, plant//IPR021109:Aspartic peptidase domain superfamily//IPR033121:Peptidase family A1 domain
LOC111376582	XP_022855321.1	aspartic_proteinase-like_protein_2,_transcript_variant_X2	Olive	PF14543:Xylanase_inhibitor_N-terminal	IPR021109:Aspartic peptidase domain superfamily//IPR001461:Aspartic peptidase A1 family//IPR033121:Peptidase family A1 domain
LOC111410300	XP_022896336.1	aspartyl_protease_AED3-like	Olive	PF14541:Xylanase_inhibitor_C-terminal
LOC111394823	XP_022876602.1	aspartyl_protease_AED3-like	Olive	PF14543:Xylanase_inhibitor_N-terminal//PF14541:Xylanase_inhibitor_C-terminal
LOC111382641		aspartyl_protease_AED3-like	Olive		IPR003593:AAA+ ATPase domain//IPR027417:P-loop containing nucleoside triphosphate hydrolase
LOC111410300	XP_022896336.1	aspartyl_protease_AED3-like	Olive	PF14541:Xylanase_inhibitor_C-terminal	IPR021109:Aspartic peptidase domain superfamily//IPR033121:Peptidase family A1 domain
LOC111382641		aspartyl_protease_AED3-like	Olive
LOC111411634	XP_022897920.1	aspartyl_protease_AED3-like,_transcript_variant_X2	Olive	PF14541:Xylanase_inhibitor_C-terminal//PF14543:Xylanase_inhibitor_N-terminal	IPR024709:Putative O-fucosyltransferase, plant
LOC111411634	XP_022897920.1	aspartyl_protease_AED3-like,_transcript_variant_X2	Olive	PF14541:Xylanase_inhibitor_C-terminal//PF14543:Xylanase_inhibitor_N-terminal	IPR021109:Aspartic peptidase domain superfamily//IPR033121:Peptidase family A1 domain
LOC111389335	XP_022870023.1	aspartyl_protease_family_protein_1-like	Olive	PF14543:Xylanase_inhibitor_N-terminal//PF14541:Xylanase_inhibitor_C-terminal	IPR001969:Aspartic peptidase, active site//IPR033121:Peptidase family A1 domain//IPR021109:Aspartic peptidase domain superfamily//IPR001461:Aspartic peptidase A1 family
LOC111385942	XP_022866134.1	aspartyl_protease_family_protein_1-like,_transcript_variant_X3	Olive	PF14543:Xylanase_inhibitor_N-terminal//PF14541:Xylanase_inhibitor_C-terminal	IPR006880:INO80 complex subunit B-like conserved region
LOC111390750	XP_022871623.1	aspartyl_protease_family_protein_2-like	Olive	PF14541:Xylanase_inhibitor_C-terminal//PF14543:Xylanase_inhibitor_N-terminal
LOC111412060	XP_022898573.1	aspartyl_protease_family_protein_2-like	Olive	PF14541:Xylanase_inhibitor_C-terminal//PF14543:Xylanase_inhibitor_N-terminal	IPR001179:FKBP-type peptidyl-prolyl cis-trans isomerase domain
LOC111411945	XP_022898408.1	aspartyl_protease_family_protein_2-like	Olive	PF14541:Xylanase_inhibitor_C-terminal//PF14543:Xylanase_inhibitor_N-terminal	IPR036452:Ribonucleoside hydrolase-like
LOC111384916	XP_022865030.1	aspartyl_protease_family_protein_2-like	Olive	PF14543:Xylanase_inhibitor_N-terminal//PF14541:Xylanase_inhibitor_C-terminal	IPR006639:Presenilin/signal peptide peptidase
LOC111409921	XP_022895802.1	aspartyl_protease_family_protein_2-like	Olive	PF14543:Xylanase_inhibitor_N-terminal//PF14541:Xylanase_inhibitor_C-terminal	IPR001881:EGF-like calcium-binding domain//IPR018097:EGF-like calcium-binding, conserved site//IPR036249:Thioredoxin-like superfamily
LOC111398970	XP_022881921.1	aspartyl_protease_family_protein_2-like	Olive	PF14543:Xylanase_inhibitor_N-terminal//PF14541:Xylanase_inhibitor_C-terminal
LOC111390750	XP_022871623.1	aspartyl_protease_family_protein_2-like	Olive	PF14541:Xylanase_inhibitor_C-terminal//PF14543:Xylanase_inhibitor_N-terminal	IPR033873:CND41-like//IPR033121:Peptidase family A1 domain//IPR001969:Aspartic peptidase, active site//IPR021109:Aspartic peptidase domain superfamily//IPR001461:Aspartic peptidase A1 family
LOC111398970	XP_022881921.1	aspartyl_protease_family_protein_2-like	Olive	PF14543:Xylanase_inhibitor_N-terminal//PF14541:Xylanase_inhibitor_C-terminal	IPR033121:Peptidase family A1 domain//IPR021109:Aspartic peptidase domain superfamily//IPR034161:Pepsin-like domain, plant//IPR001969:Aspartic peptidase, active site//IPR001461:Aspartic peptidase A1 family
LOC111409921	XP_022895802.1	aspartyl_protease_family_protein_2-like	Olive	PF14543:Xylanase_inhibitor_N-terminal//PF14541:Xylanase_inhibitor_C-terminal	IPR033121:Peptidase family A1 domain//IPR021109:Aspartic peptidase domain superfamily//IPR033873:CND41-like//IPR001461:Aspartic peptidase A1 family//IPR001969:Aspartic peptidase, active site
LOC111372048	XP_022849969.1	aspartyl_protease_family_protein_At5g10770	Olive	PF14541:Xylanase_inhibitor_C-terminal//PF14543:Xylanase_inhibitor_N-terminal
LOC111382451	XP_022862197.1	aspartyl_protease_family_protein_At5g10770-like	Olive	PF14543:Xylanase_inhibitor_N-terminal
LOC111398694	XP_022881501.1	aspartyl_protease_family_protein_At5g10770-like	Olive	PF14543:Xylanase_inhibitor_N-terminal//PF14541:Xylanase_inhibitor_C-terminal	IPR033121:Peptidase family A1 domain//IPR001969:Aspartic peptidase, active site//IPR033873:CND41-like//IPR021109:Aspartic peptidase domain superfamily//IPR001461:Aspartic peptidase A1 family
LOC111382451	XP_022862197.1	aspartyl_protease_family_protein_At5g10770-like	Olive	PF14543:Xylanase_inhibitor_N-terminal	IPR021109:Aspartic peptidase domain superfamily//IPR033121:Peptidase family A1 domain
LOC111377960	XP_022856889.1	aspartyl_protease_family_protein_At5g10770-like,_transcript_variant_X2	Olive	PF14541:Xylanase_inhibitor_C-terminal//PF14543:Xylanase_inhibitor_N-terminal
LOC111368188	XP_022845204.1	aspartyl_protease_family_protein_At5g10770-like,_transcript_variant_X2	Olive	PF14543:Xylanase_inhibitor_N-terminal//PF14541:Xylanase_inhibitor_C-terminal
LOC111402672	XP_022886825.1	ATP-dependent_Clp_protease_ATP-binding_subunit_ClpA_homolog_CD4B,_chloroplastic	Olive	PF07724:AAA_domain_(Cdc48_subfamily)//PF00004:ATPase_family_associated_with_various_cellular_activities_(AAA)//PF10431:C-terminal,_D2-small_domain,_of_ClpB_protein//PF17871:AAA_lid_domain//PF02861:Clp_amino_terminal_domain,_pathogenicity_island_component	IPR003657:WRKY domain//IPR036576:WRKY domain superfamily
LOC111377674	XP_022856568.1	ATP-dependent_Clp_protease_ATP-binding_subunit_ClpA_homolog_CD4B,_chloroplastic-like	Olive	PF00004:ATPase_family_associated_with_various_cellular_activities_(AAA)//PF07724:AAA_domain_(Cdc48_subfamily)//PF17871:AAA_lid_domain//PF02861:Clp_amino_terminal_domain,_pathogenicity_island_component//PF10431:C-terminal,_D2-small_domain,_of_ClpB_protein	IPR036396:Cytochrome P450 superfamily//IPR017972:Cytochrome P450, conserved site//IPR002401:Cytochrome P450, E-class, group I//IPR001128:Cytochrome P450
LOC111405133	XP_022889653.1	ATP-dependent_Clp_protease_ATP-binding_subunit_ClpA_homolog_CD4B,_chloroplastic-like	Olive	PF17871:AAA_lid_domain//PF10431:C-terminal,_D2-small_domain,_of_ClpB_protein//PF00004:ATPase_family_associated_with_various_cellular_activities_(AAA)//PF07724:AAA_domain_(Cdc48_subfamily)//PF02861:Clp_amino_terminal_domain,_pathogenicity_island_component	IPR002885:Pentatricopeptide repeat//IPR011990:Tetratricopeptide-like helical domain superfamily
LOC111405574	XP_022890291.1	ATP-dependent_Clp_protease_ATP-binding_subunit_CLPT1,_chloroplastic-like	Olive	PF02861:Clp_amino_terminal_domain,_pathogenicity_island_component	IPR001623:DnaJ domain//IPR036869:Chaperone J-domain superfamily
LOC111393973	XP_022875536.1	ATP-dependent_Clp_protease_ATP-binding_subunit_CLPT2,_chloroplastic-like,_transcript_variant_X2	Olive	PF02861:Clp_amino_terminal_domain,_pathogenicity_island_component
LOC111395418	XP_022877167.1	ATP-dependent_Clp_protease_proteolytic_subunit_2,_mitochondrial-like	Olive	PF00574:Clp_protease	IPR011016:Zinc finger, RING-CH-type//IPR013083:Zinc finger, RING/FYVE/PHD-type//IPR001841:Zinc finger, RING-type
LOC111399164	XP_022882191.1	ATP-dependent_Clp_protease_proteolytic_subunit_2,_mitochondrial-like	Olive	PF00574:Clp_protease
LOC111381779	XP_022861373.1	ATP-dependent_Clp_protease_proteolytic_subunit_4,_chloroplastic-like	Olive	PF00574:Clp_protease	IPR017000:Membrane-anchored ubiquitin-fold protein//IPR029071:Ubiquitin-like domain superfamily//IPR000626:Ubiquitin-like domain
LOC111375115	XP_022853673.1	ATP-dependent_Clp_protease_proteolytic_subunit_4,_chloroplastic-like	Olive	PF00574:Clp_protease
LOC111377025	XP_022855808.1	ATP-dependent_Clp_protease_proteolytic_subunit_5,_chloroplastic-like	Olive	PF00574:Clp_protease
LOC111394606	XP_022876277.1	ATP-dependent_Clp_protease_proteolytic_subunit_6,_chloroplastic,_transcript_variant_X2	Olive	PF00574:Clp_protease	IPR011009:Protein kinase-like domain superfamily//IPR000719:Protein kinase domain//IPR008271:Serine/threonine-protein kinase, active site
LOC111385859	XP_022866056.1	ATP-dependent_Clp_protease_proteolytic_subunit-like	Olive	PF00574:Clp_protease
LOC111403805	XP_022888192.1	ATP-dependent_Clp_protease_proteolytic_subunit-related_protein_1,_chloroplastic-like	Olive	PF00574:Clp_protease	IPR016024:Armadillo-type fold
LOC111389647	XP_022870360.1	ATP-dependent_Clp_protease_proteolytic_subunit-related_protein_3,_chloroplastic-like	Olive	PF00574:Clp_protease	IPR003593:AAA+ ATPase domain//IPR032675:Leucine-rich repeat domain superfamily//IPR027417:P-loop containing nucleoside triphosphate hydrolase//IPR003591:Leucine-rich repeat, typical subtype
LOC111380728	XP_022860129.1	ATP-dependent_Clp_protease_proteolytic_subunit-related_protein_3,_chloroplastic-like	Olive	PF00574:Clp_protease
LOC111390251	XP_022871031.1	ATP-dependent_Clp_protease_proteolytic_subunit-related_protein_4,_chloroplastic-like	Olive	PF00574:Clp_protease	IPR001907:ATP-dependent Clp protease proteolytic subunit//IPR029045:ClpP/crotonase-like domain superfamily
LOC111407500	XP_022892782.1	ATP-dependent_Clp_protease_proteolytic_subunit-related_protein_4,_chloroplastic-like,_transcript_variant_X5	Olive	PF00574:Clp_protease	IPR001907:ATP-dependent Clp protease proteolytic subunit//IPR029045:ClpP/crotonase-like domain superfamily
LOC111393879	XP_022875412.1	ATP-dependent_zinc_metalloprotease_FTSH,_chloroplastic	Olive	PF00004:ATPase_family_associated_with_various_cellular_activities_(AAA)//PF17862:AAA+_lid_domain//PF01434:Peptidase_family_M41
LOC111373798	XP_022852129.1	ATP-dependent_zinc_metalloprotease_FTSH,_chloroplastic-like	Olive	PF00004:ATPase_family_associated_with_various_cellular_activities_(AAA)//PF01434:Peptidase_family_M41
LOC111385071	XP_022865203.1	ATP-dependent_zinc_metalloprotease_FTSH_11,_chloroplastic/mitochondrial	Olive	PF01434:Peptidase_family_M41//PF00004:ATPase_family_associated_with_various_cellular_activities_(AAA)//PF17862:AAA+_lid_domain	IPR000270:PB1 domain
LOC111399510	XP_022882634.1	ATP-dependent_zinc_metalloprotease_FTSH_12,_chloroplastic	Olive	PF01434:Peptidase_family_M41//PF17862:AAA+_lid_domain//PF00004:ATPase_family_associated_with_various_cellular_activities_(AAA)	IPR023329:Chlorophyll a/b binding domain superfamily
LOC111387912	XP_022868304.1	ATP-dependent_zinc_metalloprotease_FTSH_12,_chloroplastic-like,_transcript_variant_X9	Olive
LOC111395517	XP_022877306.1	ATP-dependent_zinc_metalloprotease_FTSH_2,_chloroplastic	Olive	PF17862:AAA+_lid_domain//PF01434:Peptidase_family_M41//PF00004:ATPase_family_associated_with_various_cellular_activities_(AAA)	IPR004000:Actin family//IPR020902:Actin/actin-like conserved site//IPR004001:Actin, conserved site//IPR043129:ATPase, nucleotide binding domain
LOC111373559	XP_022851876.1	ATP-dependent_zinc_metalloprotease_FTSH_4,_mitochondrial	Olive	PF00004:ATPase_family_associated_with_various_cellular_activities_(AAA)//PF17862:AAA+_lid_domain//PF01434:Peptidase_family_M41	IPR006460:Protein MIZU-KUSSEI 1-like, plant
LOC111367464	XP_022844121.1	ATP-dependent_zinc_metalloprotease_FTSH_6,_chloroplastic	Olive	PF00004:ATPase_family_associated_with_various_cellular_activities_(AAA)//PF01434:Peptidase_family_M41//PF17862:AAA+_lid_domain	IPR000639:Epoxide hydrolase-like//IPR029058:Alpha/Beta hydrolase fold//IPR000073:Alpha/beta hydrolase fold-1
LOC111388434	XP_022868904.1	CAAX_prenyl_protease_2,_transcript_variant_X2	Olive	PF02517:CPBP_intramembrane_metalloprotease	IPR012677:Nucleotide-binding alpha-beta plait domain superfamily//IPR000504:RNA recognition motif domain//IPR035979:RNA-binding domain superfamily//IPR002004:Polyadenylate-binding protein/Hyperplastic disc protein//IPR006515:Polyadenylate binding protein, human types 1, 2, 3, 4//IPR036053:PABC (PABP) domain
LOC111394265	XP_022875797.1	caffeoylshikimate_esterase,_transcript_variant_X2	Olive	PF12146:Serine_aminopeptidase,_S33	IPR036915:Cyclin-like superfamily
LOC111380793	XP_022860245.1	caffeoylshikimate_esterase-like	Olive	PF12146:Serine_aminopeptidase,_S33	IPR002885:Pentatricopeptide repeat//IPR011990:Tetratricopeptide-like helical domain superfamily
LOC111389230	XP_022869888.1	caffeoylshikimate_esterase-like	Olive	PF12146:Serine_aminopeptidase,_S33	IPR040442:Pyruvate kinase-like domain superfamily//IPR010121:Pyruvate, phosphate dikinase//IPR013815:ATP-grasp fold, subdomain 1//IPR015813:Pyruvate/Phosphoenolpyruvate kinase-like domain superfamily//IPR036637:Phosphohistidine domain superfamily//IPR018274:PEP-utilising enzyme, active site//IPR023151:PEP-utilising enzyme, conserved site
LOC111370048	XP_022847527.1	caffeoylshikimate_esterase-like	Olive	PF12146:Serine_aminopeptidase,_S33
LOC111376971	XP_022855750.1	caffeoylshikimate_esterase-like	Olive	PF12146:Serine_aminopeptidase,_S33	IPR002885:Pentatricopeptide repeat//IPR011990:Tetratricopeptide-like helical domain superfamily
LOC111405459	XP_022890123.1	caffeoylshikimate_esterase-like	Olive	PF12146:Serine_aminopeptidase,_S33	IPR036514:SGNH hydrolase superfamily//IPR035669:GDSL lipase/esterase-like, plant
LOC111366180	XP_022842645.1	caffeoylshikimate_esterase-like	Olive	PF12146:Serine_aminopeptidase,_S33
LOC111375693	XP_022854330.1	caffeoylshikimate_esterase-like,_transcript_variant_X2	Olive	PF12146:Serine_aminopeptidase,_S33
LOC111401199	XP_022884597.1	calpain-type_cysteine_protease_DEK1-like	Olive	PF00648:Calpain_family_cysteine_protease//PF01067:Calpain_large_subunit,_domain_III
LOC111406664	XP_022891820.1	calpain-type_cysteine_protease_DEK1-like	Olive	PF00648:Calpain_family_cysteine_protease//PF01067:Calpain_large_subunit,_domain_III	IPR020845:AMP-binding, conserved site//IPR042099:AMP-dependent synthetase-like superfamily
LOC111379730	XP_022858936.1	carboxyl-terminal-processing_peptidase_2,_chloroplastic-like	Olive	PF03572:Peptidase_family_S41//PF17820:PDZ_domain	IPR035513:Invertase/pectin methylesterase inhibitor domain superfamily//IPR006501:Pectinesterase inhibitor domain
LOC111393795	XP_022875268.1	carboxypeptidase_SOL1,_transcript_variant_X2	Olive	PF00246:Zinc_carboxypeptidase	IPR006040:Allergen Ole e 1, conserved site
LOC111366143	XP_022842596.1	chloroplast_processing_peptidase-like	Olive	PF10502:Signal_peptidase,_peptidase_S26	IPR003409:MORN motif
LOC111388625	XP_022869149.1	CLP_protease_regulatory_subunit_CLPX1,_mitochondrial-like,_transcript_variant_X5	Olive
LOC111389519	XP_022870220.1	CLP_protease_regulatory_subunit_CLPX3,_mitochondrial-like,_transcript_variant_X4	Olive	PF07724:AAA_domain_(Cdc48_subfamily)	IPR002885:Pentatricopeptide repeat//IPR011990:Tetratricopeptide-like helical domain superfamily
LOC111376671	XP_022855410.1	CO(2)-response_secreted_protease-like	Olive	PF05922:Peptidase_inhibitor_I9//PF02225:PA_domain//PF00082:Subtilase_family//PF17766:Fibronectin_type-III_domain
LOC111365315	XP_022841530.1	cysteine_protease_ATG4-like	Olive	PF03416:Peptidase_family_C54	IPR017451:F-box associated interaction domain//IPR036047:F-box-like domain superfamily//IPR001810:F-box domain
LOC111410627	XP_022896836.1	cysteine_protease_ATG4-like	Olive	PF03416:Peptidase_family_C54	IPR038765:Papain-like cysteine peptidase superfamily
LOC111365315	XP_022841530.1	cysteine_protease_ATG4-like	Olive	PF03416:Peptidase_family_C54	IPR038765:Papain-like cysteine peptidase superfamily
LOC111367853	XP_022844692.1	cysteine_protease_ATG4-like,_transcript_variant_X2	Olive	PF03416:Peptidase_family_C54	IPR036034:PDZ superfamily//IPR001478:PDZ domain//IPR009003:Peptidase S1, PA clan//IPR001940:Peptidase S1C
LOC111378038	XP_022856965.1	cysteine_protease_RD19A-like	Olive	PF00112:Papain_family_cysteine_protease//PF08246:Cathepsin_propeptide_inhibitor_domain_(I29)	IPR002885:Pentatricopeptide repeat//IPR011990:Tetratricopeptide-like helical domain superfamily
LOC111380660	XP_022860057.1	cysteine_protease_RD19A-like	Olive	PF08246:Cathepsin_propeptide_inhibitor_domain_(I29)//PF00112:Papain_family_cysteine_protease	IPR036576:WRKY domain superfamily//IPR003657:WRKY domain
LOC111378038	XP_022856965.1	cysteine_protease_RD19A-like	Olive	PF00112:Papain_family_cysteine_protease//PF08246:Cathepsin_propeptide_inhibitor_domain_(I29)	IPR025660:Cysteine peptidase, histidine active site//IPR000169:Cysteine peptidase, cysteine active site//IPR000668:Peptidase C1A, papain C-terminal//IPR013201:Cathepsin propeptide inhibitor domain (I29)//IPR039417:Papain-like cysteine endopeptidase//IPR038765:Papain-like cysteine peptidase superfamily//IPR025661:Cysteine peptidase, asparagine active site
LOC111378676	XP_022857672.1	cysteine_protease_XCP1-like	Olive	PF08246:Cathepsin_propeptide_inhibitor_domain_(I29)//PF00112:Papain_family_cysteine_protease	IPR039417:Papain-like cysteine endopeptidase//IPR025660:Cysteine peptidase, histidine active site//IPR038765:Papain-like cysteine peptidase superfamily//IPR013201:Cathepsin propeptide inhibitor domain (I29)//IPR000169:Cysteine peptidase, cysteine active site//IPR000668:Peptidase C1A, papain C-terminal
LOC111378548	XP_022857536.1	cysteine_protease_XCP2-like	Olive	PF08246:Cathepsin_propeptide_inhibitor_domain_(I29)//PF00112:Papain_family_cysteine_protease
LOC111385176	XP_022865316.1	cysteine_proteinase_3-like	Olive	PF08246:Cathepsin_propeptide_inhibitor_domain_(I29)//PF00112:Papain_family_cysteine_protease	IPR003823:Domain of unknown function CP12
LOC111368619	XP_022845740.1	cysteine_proteinase_3-like,_transcript_variant_X2	Olive	PF00112:Papain_family_cysteine_protease//PF08246:Cathepsin_propeptide_inhibitor_domain_(I29)
LOC111375250	XP_022853819.1	cysteine_proteinase_inhibitor_1-like	Olive	PF16845:Aspartic_acid_proteinase_inhibitor
LOC111397749	XP_022880502.1	cysteine_proteinase_inhibitor_1-like	Olive	PF16845:Aspartic_acid_proteinase_inhibitor
LOC111375250	XP_022853819.1	cysteine_proteinase_inhibitor_1-like	Olive	PF16845:Aspartic_acid_proteinase_inhibitor	IPR000010:Cystatin domain//IPR018073:Proteinase inhibitor I25, cystatin, conserved site
LOC111381973	XP_022861583.1	cysteine_proteinase_inhibitor_6-like	Olive	PF16845:Aspartic_acid_proteinase_inhibitor	IPR018073:Proteinase inhibitor I25, cystatin, conserved site//IPR000010:Cystatin domain
LOC111371537	XP_022849348.1	cysteine_proteinase_inhibitor_B-like	Olive	PF16845:Aspartic_acid_proteinase_inhibitor
LOC111371537	XP_022849348.1	cysteine_proteinase_inhibitor_B-like	Olive	PF16845:Aspartic_acid_proteinase_inhibitor	IPR000010:Cystatin domain
LOC111400730	XP_022883886.1	cysteine_proteinase_inhibitor-like	Olive	PF16845:Aspartic_acid_proteinase_inhibitor	IPR011009:Protein kinase-like domain superfamily//IPR000403:Phosphatidylinositol 3-/4-kinase, catalytic domain//IPR036940:Phosphatidylinositol 3-/4-kinase, catalytic domain superfamily
LOC111410137	XP_022896123.1	cysteine_proteinase_RD21A-like	Olive	PF00112:Papain_family_cysteine_protease//PF00396:Granulin//PF08246:Cathepsin_propeptide_inhibitor_domain_(I29)	IPR005018:DOMON domain
LOC111411144	XP_022897474.1	deSI-like_protein_At4g17486	Olive	PF05903:PPPDE_putative_peptidase_domain
LOC111376162	XP_022854871.1	deSI-like_protein_At4g17486	Olive	PF05903:PPPDE_putative_peptidase_domain	IPR001611:Leucine-rich repeat//IPR003591:Leucine-rich repeat, typical subtype//IPR000719:Protein kinase domain//IPR017441:Protein kinase, ATP binding site//IPR008271:Serine/threonine-protein kinase, active site//IPR032675:Leucine-rich repeat domain superfamily//IPR011009:Protein kinase-like domain superfamily
LOC111398457	XP_022881128.1	deSI-like_protein_At4g17486	Olive	PF05903:PPPDE_putative_peptidase_domain
LOC111375753	XP_022854389.1	deSI-like_protein_At4g17486,_transcript_variant_X2	Olive	PF05903:PPPDE_putative_peptidase_domain	IPR036915:Cyclin-like superfamily//IPR012389:Cyclin P/U
LOC111374057	XP_022852447.1	deSI-like_protein_At4g17486,_transcript_variant_X2	Olive	PF05903:PPPDE_putative_peptidase_domain
LOC111374815	XP_022853323.1	deSI-like_protein_At4g17486,_transcript_variant_X2	Olive	PF05903:PPPDE_putative_peptidase_domain	IPR011050:Pectin lyase fold/virulence factor//IPR012334:Pectin lyase fold//IPR006501:Pectinesterase inhibitor domain//IPR035513:Invertase/pectin methylesterase inhibitor domain superfamily
LOC111375753	XP_022854389.1	deSI-like_protein_At4g17486,_transcript_variant_X2	Olive	PF05903:PPPDE_putative_peptidase_domain	IPR008580:PPPDE putative peptidase domain//IPR042266:PPPDE putative peptidase domain superfamily
LOC111380631	XP_022860016.1	deSI-like_protein_At4g17486,_transcript_variant_X3	Olive	PF05903:PPPDE_putative_peptidase_domain	IPR029058:Alpha/Beta hydrolase fold
LOC111391830	XP_022872865.1	deSI-like_protein_At4g17486,_transcript_variant_X3	Olive	PF05903:PPPDE_putative_peptidase_domain
LOC111405798	XP_022890607.1	desumoylating_isopeptidase_1	Olive	PF05903:PPPDE_putative_peptidase_domain
LOC111393908	XP_022875448.1	desumoylating_isopeptidase_2-like	Olive	PF05903:PPPDE_putative_peptidase_domain	IPR002048:EF-hand domain//IPR011992:EF-hand domain pair//IPR018247:EF-Hand 1, calcium-binding site
LOC111377417	XP_022856280.1	desumoylating_isopeptidase_2-like	Olive	PF05903:PPPDE_putative_peptidase_domain	IPR009072:Histone-fold
LOC111384147	XP_022864167.1	desumoylating_isopeptidase_2-like	Olive	PF05903:PPPDE_putative_peptidase_domain	IPR003099:Prephenate dehydrogenase//IPR036291:NAD(P)-binding domain superfamily
LOC111377417	XP_022856280.1	desumoylating_isopeptidase_2-like	Olive	PF05903:PPPDE_putative_peptidase_domain	IPR042266:PPPDE putative peptidase domain superfamily//IPR008580:PPPDE putative peptidase domain
LOC111402939	XP_022887038.1	dipeptidyl_aminopeptidase_4-like	Olive	PF00930:Dipeptidyl_peptidase_IV_(DPP_IV)_N-terminal_region//PF00326:Prolyl_oligopeptidase_family	IPR036312:Bifunctional inhibitor/plant lipid transfer protein/seed storage helical domain superfamily//IPR016140:Bifunctional inhibitor/plant lipid transfer protein/seed storage helical domain
LOC111412282	XP_022898909.1	DNA-dependent_metalloprotease_WSS1-like,_transcript_variant_X3	Olive	PF00641:Zn-finger_in_Ran_binding_protein_and_others//PF08325:WLM_domain	IPR038297:CcmH/CycL/Ccl2/NrfF domain superfamily
LOC111403399	XP_022887666.1	endoplasmic_reticulum_metallopeptidase_1	Olive	PF04389:Peptidase_family_M28	IPR032675:Leucine-rich repeat domain superfamily//IPR027417:P-loop containing nucleoside triphosphate hydrolase//IPR036388:Winged helix-like DNA-binding domain superfamily
LOC111402176	XP_022886096.1	endoplasmic_reticulum_metallopeptidase_1,_transcript_variant_X3	Olive	PF04389:Peptidase_family_M28	IPR013083:Zinc finger, RING/FYVE/PHD-type//IPR001841:Zinc finger, RING-type
LOC111408025	XP_022893538.1	ERBB-3_BINDING_PROTEIN_1-like	Olive	PF00557:Metallopeptidase_family_M24	IPR014710:RmlC-like jelly roll fold//IPR027496:1,2-dihydroxy-3-keto-5-methylthiopentene dioxygenase, eukaryotes//IPR011051:RmlC-like cupin domain superfamily
LOC111392538	XP_022873670.1	ERBB-3_BINDING_PROTEIN_1-like,_transcript_variant_X2	Olive	PF00557:Metallopeptidase_family_M24	IPR014721:Ribosomal protein S5 domain 2-type fold, subgroup
LOC111399606	XP_022882780.1	gamma-glutamyl_peptidase_3-like,_transcript_variant_X4	Olive	PF00117:Glutamine_amidotransferase_class-I	IPR036249:Thioredoxin-like superfamily//IPR013766:Thioredoxin domain
LOC111399606	XP_022882780.1	gamma-glutamyl_peptidase_3-like,_transcript_variant_X4	Olive	PF00117:Glutamine_amidotransferase_class-I	IPR029062:Class I glutamine amidotransferase-like//IPR017926:Glutamine amidotransferase
LOC111410202	XP_022896209.1	gamma-glutamyl_peptidase_5-like	Olive	PF00117:Glutamine_amidotransferase_class-I	IPR027417:P-loop containing nucleoside triphosphate hydrolase
LOC111410677	XP_022896905.1	gamma-glutamyl_peptidase_5-like	Olive	PF00117:Glutamine_amidotransferase_class-I	IPR005722:ATP synthase, F1 complex, beta subunit//IPR036121:ATPase, F1/V1/A1 complex, alpha/beta subunit, N-terminal domain superfamily//IPR003593:AAA+ ATPase domain//IPR027417:P-loop containing nucleoside triphosphate hydrolase//IPR020003:ATPase, alpha/beta subunit, nucleotide-binding domain, active site//IPR024034:ATPase, F1/V1 complex, beta/alpha subunit, C-terminal
LOC111389020	XP_022869638.1	gamma-glutamyl_peptidase_5-like	Olive	PF00117:Glutamine_amidotransferase_class-I
LOC111386638	XP_022866872.1	gamma-glutamyl_peptidase_5-like	Olive		IPR001480:Bulb-type lectin domain//IPR036426:Bulb-type lectin domain superfamily
LOC111405087	XP_022889573.1	IAA-amino_acid_hydrolase_ILR1-like_1	Olive	PF01546:Peptidase_family_M20/M25/M40	IPR033690:Adenylate kinase, conserved site//IPR006259:Adenylate kinase subfamily//IPR000850:Adenylate kinase/UMP-CMP kinase//IPR027417:P-loop containing nucleoside triphosphate hydrolase
LOC111388848	XP_022869430.1	IAA-amino_acid_hydrolase_ILR1-like_1	Olive	PF01546:Peptidase_family_M20/M25/M40//PF07687:Peptidase_dimerisation_domain	IPR027417:P-loop containing nucleoside triphosphate hydrolase//IPR032675:Leucine-rich repeat domain superfamily//IPR038005:Virus X resistance protein-like, coiled-coil domain
LOC111403979	XP_022888443.1	IAA-amino_acid_hydrolase_ILR1-like_3	Olive	PF01546:Peptidase_family_M20/M25/M40//PF07687:Peptidase_dimerisation_domain	IPR001763:Rhodanese-like domain//IPR029058:Alpha/Beta hydrolase fold//IPR036873:Rhodanese-like domain superfamily
LOC111367744	XP_022844546.1	IAA-amino_acid_hydrolase_ILR1-like_5,_transcript_variant_X2	Olive	PF01546:Peptidase_family_M20/M25/M40//PF07687:Peptidase_dimerisation_domain	IPR036570:HORMA domain superfamily//IPR003511:HORMA domain
LOC111380794	XP_022860209.1	IAA-amino_acid_hydrolase_ILR1-like_6,_transcript_variant_X3	Olive	PF01546:Peptidase_family_M20/M25/M40	IPR012334:Pectin lyase fold//IPR035513:Invertase/pectin methylesterase inhibitor domain superfamily//IPR006501:Pectinesterase inhibitor domain//IPR011050:Pectin lyase fold/virulence factor//IPR033131:Pectinesterase, Asp active site
LOC111394354	XP_022875891.1	IAA-amino_acid_hydrolase_ILR1-like_6,_transcript_variant_X3	Olive	PF01546:Peptidase_family_M20/M25/M40//PF07687:Peptidase_dimerisation_domain	IPR027417:P-loop containing nucleoside triphosphate hydrolase//IPR032675:Leucine-rich repeat domain superfamily//IPR003593:AAA+ ATPase domain
LOC111380794	XP_022860209.1	IAA-amino_acid_hydrolase_ILR1-like_6,_transcript_variant_X3	Olive	PF01546:Peptidase_family_M20/M25/M40	IPR036264:Bacterial exopeptidase dimerisation domain//IPR017439:Amidohydrolase
LOC111372397	XP_022850510.1	isoaspartyl_peptidase/L-asparaginase_1	Olive	PF01112:Asparaginase	IPR003656:Zinc finger, BED-type//IPR037220:Zinc finger BED domain//IPR012337:Ribonuclease H-like superfamily
LOC111372397	XP_022850510.1	isoaspartyl_peptidase/L-asparaginase_1	Olive	PF01112:Asparaginase	IPR029055:Nucleophile aminohydrolases, N-terminal
LOC111376246	XP_022854966.1	leucine_aminopeptidase_2,_chloroplastic-like	Olive	PF00883:Cytosol_aminopeptidase_family,_catalytic_domain	IPR036291:NAD(P)-binding domain superfamily
LOC111376244	XP_022854964.1	leucine_aminopeptidase_2,_chloroplastic-like	Olive	PF02789:Cytosol_aminopeptidase_family,_N-terminal_domain//PF00883:Cytosol_aminopeptidase_family,_catalytic_domain	IPR005045:CDC50/LEM3 family
LOC111376246	XP_022854966.1	leucine_aminopeptidase_2,_chloroplastic-like	Olive	PF00883:Cytosol_aminopeptidase_family,_catalytic_domain
LOC111376244	XP_022854964.1	leucine_aminopeptidase_2,_chloroplastic-like	Olive	PF02789:Cytosol_aminopeptidase_family,_N-terminal_domain//PF00883:Cytosol_aminopeptidase_family,_catalytic_domain	IPR000819:Peptidase M17, leucyl aminopeptidase, C-terminal//IPR011356:Peptidase M17, leucine aminopeptidase/peptidase B//IPR023042:Peptidase M17, leucine aminopeptidase//IPR043472:Macro domain-like
LOC111389176	XP_022869836.1	leucine_aminopeptidase_2,_chloroplastic-like,_transcript_variant_X2	Olive	PF02789:Cytosol_aminopeptidase_family,_N-terminal_domain//PF00883:Cytosol_aminopeptidase_family,_catalytic_domain	IPR036869:Chaperone J-domain superfamily//IPR011990:Tetratricopeptide-like helical domain superfamily//IPR019734:Tetratricopeptide repeat//IPR001623:DnaJ domain//IPR013026:Tetratricopeptide repeat-containing domain//IPR018253:DnaJ domain, conserved site
LOC111368223	XP_022845244.1	leucine_aminopeptidase_2,_chloroplastic-like,_transcript_variant_X2	Olive	PF02789:Cytosol_aminopeptidase_family,_N-terminal_domain//PF00883:Cytosol_aminopeptidase_family,_catalytic_domain	IPR000719:Protein kinase domain//IPR003591:Leucine-rich repeat, typical subtype//IPR011009:Protein kinase-like domain superfamily//IPR032675:Leucine-rich repeat domain superfamily
LOC111409289	XP_022895080.1	LON_peptidase_N-terminal_domain_and_RING_finger_protein_3-like	Olive	PF13923:Zinc_finger,_C3HC4_type_(RING_finger)	IPR036890:Histidine kinase/HSP90-like ATPase superfamily//IPR020575:Heat shock protein Hsp90, N-terminal//IPR001404:Heat shock protein Hsp90 family//IPR019805:Heat shock protein Hsp90, conserved site//IPR003594:Histidine kinase/HSP90-like ATPase//IPR037196:HSP90, C-terminal domain//IPR020568:Ribosomal protein S5 domain 2-type fold
LOC111382651	XP_022862449.1	lon_protease_2-like,_transcript_variant_X2	Olive	PF02190:ATP-dependent_protease_La_(LON)_substrate-binding_domain
LOC111411155	XP_022897481.1	lon_protease_homolog_1,_mitochondrial-like	Olive	PF02190:ATP-dependent_protease_La_(LON)_substrate-binding_domain//PF05362:Lon_protease_(S16)_C-terminal_proteolytic_domain
LOC111389893	XP_022870641.1	lon_protease_homolog_2,_peroxisomal,_transcript_variant_X3	Olive	PF05362:Lon_protease_(S16)_C-terminal_proteolytic_domain//PF02190:ATP-dependent_protease_La_(LON)_substrate-binding_domain//PF00004:ATPase_family_associated_with_various_cellular_activities_(AAA)	IPR005818:Linker histone H1/H5, domain H15//IPR036388:Winged helix-like DNA-binding domain superfamily//IPR036390:Winged helix DNA-binding domain superfamily
LOC111407496	XP_022892775.1	lon_protease_homolog_2,_peroxisomal-like,_transcript_variant_X2	Olive	PF00004:ATPase_family_associated_with_various_cellular_activities_(AAA)//PF05362:Lon_protease_(S16)_C-terminal_proteolytic_domain
LOC111394643		LOW_QUALITY_PROTEIN:_ATP-dependent_Clp_protease_proteolytic_subunit-related_protein_1,_chloroplastic-like	Olive		IPR027417:P-loop containing nucleoside triphosphate hydrolase
LOC111390212		LOW_QUALITY_PROTEIN:_lon_protease_homolog_1,_mitochondrial-like	Olive
LOC111388177	XP_022868628.1	low-temperature-induced_cysteine_proteinase-like	Olive	PF00112:Papain_family_cysteine_protease//PF00396:Granulin	IPR008979:Galactose-binding-like domain superfamily//IPR017853:Glycoside hydrolase superfamily//IPR019801:Glycoside hydrolase, family 35, conserved site//IPR001944:Glycoside hydrolase, family 35
LOC111411995	XP_022898480.1	low-temperature-induced_cysteine_proteinase-like	Olive	PF08246:Cathepsin_propeptide_inhibitor_domain_(I29)//PF00396:Granulin//PF00112:Papain_family_cysteine_protease
LOC111409026	XP_022894692.1	low-temperature-induced_cysteine_proteinase-like,_transcript_variant_X3	Olive	PF08246:Cathepsin_propeptide_inhibitor_domain_(I29)//PF00112:Papain_family_cysteine_protease//PF00396:Granulin	IPR015943:WD40/YVTN repeat-like-containing domain superfamily//IPR036691:Endonuclease/exonuclease/phosphatase superfamily//IPR000300:Inositol polyphosphate-related phosphatase//IPR036322:WD40-repeat-containing domain superfamily//IPR001680:WD40 repeat//IPR000535:Major sperm protein (MSP) domain//IPR017986:WD40-repeat-containing domain
LOC111367274	XP_022843819.1	lysosomal_Pro-X_carboxypeptidase	Olive	PF05577:Serine_carboxypeptidase_S28	IPR029058:Alpha/Beta hydrolase fold//IPR033140:Lipase, GDXG, putative serine active site
LOC111372505	XP_022850621.1	lysosomal_Pro-X_carboxypeptidase	Olive	PF05577:Serine_carboxypeptidase_S28	IPR029058:Alpha/Beta hydrolase fold//IPR042269:Serine carboxypeptidase S28, SKS domain
LOC111399641	XP_022882839.1	lysosomal_Pro-X_carboxypeptidase,_transcript_variant_X2	Olive	PF05577:Serine_carboxypeptidase_S28	IPR036457:PPM-type phosphatase domain superfamily//IPR001932:PPM-type phosphatase domain//IPR000222:PPM-type phosphatase, divalent cation binding
LOC111403975	XP_022888440.1	lysosomal_Pro-X_carboxypeptidase-like	Olive	PF05577:Serine_carboxypeptidase_S28
LOC111406356	XP_022891535.1	metalloendoproteinase_2-MMP-like	Olive	PF00413:Matrixin//PF01471:Putative_peptidoglycan_binding_domain
LOC111398841	XP_022881729.1	metalloendoproteinase_2-MMP-like	Olive	PF00413:Matrixin//PF01471:Putative_peptidoglycan_binding_domain	IPR011009:Protein kinase-like domain superfamily//IPR000719:Protein kinase domain
LOC111383433	XP_022863312.1	metalloendoproteinase_4-MMP-like	Olive	PF01471:Putative_peptidoglycan_binding_domain//PF00413:Matrixin
LOC111410346	XP_022896399.1	methionine_aminopeptidase_1D,_chloroplastic/mitochondrial,_transcript_variant_X3	Olive	PF00557:Metallopeptidase_family_M24	IPR032675:Leucine-rich repeat domain superfamily
LOC111378707	XP_022857712.1	mitochondrial_inner_membrane_protease_subunit_1-like,_transcript_variant_X2	Olive	PF00717:Peptidase_S24-like	IPR005123:Oxoglutarate/iron-dependent dioxygenase//IPR027443:Isopenicillin N synthase-like
LOC111406064	XP_022891023.1	mitochondrial_intermediate_peptidase,_mitochondrial,_transcript_variant_X3	Olive	PF01432:Peptidase_family_M3	IPR036259:MFS transporter superfamily
LOC111366130	XP_022842576.1	mitochondrial-processing_peptidase_subunit_alpha-like,_transcript_variant_X3	Olive	PF00675:Insulinase_(Peptidase_family_M16)//PF05193:Peptidase_M16_inactive_domain
LOC111387819	XP_022868180.1	monoacylglycerol_lipase,_transcript_variant_X2	Olive	PF12146:Serine_aminopeptidase,_S33
LOC111412474	XP_022899178.1	organellar_oligopeptidase_A,_chloroplastic/mitochondrial-like,_transcript_variant_X3	Olive	PF01432:Peptidase_family_M3	IPR024077:Neurolysin/Thimet oligopeptidase, domain 2
LOC111365303	XP_022841554.1	OTU_domain-containing_protein_1-like,_transcript_variant_X6	Olive	PF02338:OTU-like_cysteine_protease
LOC111383083	XP_022862919.1	OTU_domain-containing_protein_5,_transcript_variant_X2	Olive	PF02338:OTU-like_cysteine_protease	IPR000014:PAS domain//IPR036047:F-box-like domain superfamily//IPR015915:Kelch-type beta propeller//IPR011043:Galactose oxidase/kelch, beta-propeller//IPR035965:PAS domain superfamily
LOC111367638	XP_022844391.1	OTU_domain-containing_protein_6B	Olive	PF02338:OTU-like_cysteine_protease	IPR043001:Inositol-pentakisphosphate 2-kinase, N-terminal
LOC111403287	XP_022887493.1	OTU_domain-containing_protein_At3g57810,_transcript_variant_X2	Olive	PF02338:OTU-like_cysteine_protease	IPR029063:S-adenosyl-L-methionine-dependent methyltransferase
LOC111407598	XP_022892971.1	OTU_domain-containing_protein_At3g57810-like	Olive	PF02338:OTU-like_cysteine_protease	IPR038765:Papain-like cysteine peptidase superfamily//IPR003323:OTU domain
LOC111400784	XP_022883953.1	OTU_domain-containing_protein_DDB_G0284757,_transcript_variant_X3	Olive	PF02338:OTU-like_cysteine_protease	IPR038150:Protein CHLORORESPIRATORY REDUCTION 7-like superfamily
LOC111365669	XP_022841976.1	OTU_domain-containing_protein_DDB_G0284757-like	Olive	PF02338:OTU-like_cysteine_protease
LOC111407865	XP_022893327.1	OTU_domain-containing_protein_DDB_G0284757-like,_transcript_variant_X2	Olive	PF02338:OTU-like_cysteine_protease
LOC111366222	XP_022842713.1	OTU_domain-containing_protein_DDB_G0284757-like,_transcript_variant_X8	Olive	PF02338:OTU-like_cysteine_protease	IPR036249:Thioredoxin-like superfamily
LOC111381279	XP_022860815.1	presequence_protease_1,_chloroplastic/mitochondrial-like	Olive	PF05193:Peptidase_M16_inactive_domain//PF08367:Peptidase_M16C_associated//PF00675:Insulinase_(Peptidase_family_M16)	IPR013087:Zinc finger C2H2-type//IPR036236:Zinc finger C2H2 superfamily
LOC111405371	XP_022889970.1	probable_aspartyl_aminopeptidase	Olive	PF02127:Aminopeptidase_I_zinc_metalloprotease_(M18)	IPR001841:Zinc finger, RING-type//IPR013083:Zinc finger, RING/FYVE/PHD-type
LOC111405317	XP_022889911.1	probable_aspartyl_aminopeptidase	Olive	PF02127:Aminopeptidase_I_zinc_metalloprotease_(M18)	IPR005045:CDC50/LEM3 family
LOC111405371	XP_022889970.1	probable_aspartyl_aminopeptidase	Olive	PF02127:Aminopeptidase_I_zinc_metalloprotease_(M18)	IPR023358:Peptidase M18, domain 2//IPR001948:Peptidase M18
LOC111396394	XP_022878600.1	probable_aspartyl_protease_At4g16563	Olive	PF14541:Xylanase_inhibitor_C-terminal//PF14543:Xylanase_inhibitor_N-terminal	IPR000315:B-box-type zinc finger//IPR010402:CCT domain
LOC111399777	XP_022883022.1	probable_aspartyl_protease_At4g16563	Olive	PF14541:Xylanase_inhibitor_C-terminal//PF14543:Xylanase_inhibitor_N-terminal
LOC111396394	XP_022878600.1	probable_aspartyl_protease_At4g16563	Olive	PF14541:Xylanase_inhibitor_C-terminal//PF14543:Xylanase_inhibitor_N-terminal	IPR034161:Pepsin-like domain, plant//IPR033121:Peptidase family A1 domain//IPR021109:Aspartic peptidase domain superfamily//IPR001969:Aspartic peptidase, active site
LOC111394575	XP_022876210.1	probable_cysteine_protease_RD19B	Olive	PF00112:Papain_family_cysteine_protease//PF08246:Cathepsin_propeptide_inhibitor_domain_(I29)	IPR005540:KNOX1//IPR005539:ELK domain//IPR009057:Homeobox-like domain superfamily//IPR001356:Homeobox domain//IPR017970:Homeobox, conserved site//IPR005541:KNOX2
LOC111410084	XP_022896033.1	probable_cysteine_protease_RD19B,_transcript_variant_X3	Olive	PF08246:Cathepsin_propeptide_inhibitor_domain_(I29)//PF00112:Papain_family_cysteine_protease	IPR029058:Alpha/Beta hydrolase fold
LOC111375518	XP_022854122.1	probable_cysteine_protease_RD19D	Olive	PF08246:Cathepsin_propeptide_inhibitor_domain_(I29)//PF00112:Papain_family_cysteine_protease	IPR037104:Annexin superfamily//IPR018502:Annexin repeat//IPR009118:Annexin D, plant//IPR001464:Annexin//IPR018252:Annexin repeat, conserved site
LOC111409008	XP_022894667.1	probable_cytosolic_oligopeptidase_A,_transcript_variant_X2	Olive	PF01432:Peptidase_family_M3
LOC111397237	XP_022879826.1	probable_cytosolic_oligopeptidase_A,_transcript_variant_X4	Olive	PF01432:Peptidase_family_M3
LOC111367224	XP_022843758.1	probable_glutamate_carboxypeptidase_AMP1,_transcript_variant_X2	Olive	PF04253:Transferrin_receptor-like_dimerisation_domain//PF04389:Peptidase_family_M28
LOC111399423	XP_022882498.1	probable_glutamate_carboxypeptidase_LAMP1	Olive	PF04253:Transferrin_receptor-like_dimerisation_domain//PF02225:PA_domain//PF04389:Peptidase_family_M28	IPR011990:Tetratricopeptide-like helical domain superfamily
LOC111404529	XP_022889093.1	probable_glutamyl_endopeptidase,_chloroplastic	Olive	PF00326:Prolyl_oligopeptidase_family
LOC111402891	XP_022886978.1	probable_inactive_ATP-dependent_zinc_metalloprotease_FTSHI_1,_chloroplastic,_transcript_variant_X2	Olive	PF01434:Peptidase_family_M41//PF00004:ATPase_family_associated_with_various_cellular_activities_(AAA)	IPR009072:Histone-fold
LOC111405129	XP_022889650.1	probable_inactive_ATP-dependent_zinc_metalloprotease_FTSHI_2,_chloroplastic	Olive	PF01434:Peptidase_family_M41//PF17862:AAA+_lid_domain//PF00004:ATPase_family_associated_with_various_cellular_activities_(AAA)	IPR023214:HAD superfamily//IPR023299:P-type ATPase, cytoplasmic domain N//IPR023298:P-type ATPase, transmembrane domain superfamily//IPR018303:P-type ATPase, phosphorylation site//IPR001757:P-type ATPase//IPR008250:P-type ATPase, A domain superfamily//IPR036412:HAD-like superfamily//IPR004014:Cation-transporting P-type ATPase, N-terminal//IPR006408:P-type ATPase, subfamily IIB
LOC111367906	XP_022844787.1	probable_inactive_ATP-dependent_zinc_metalloprotease_FTSHI_3,_chloroplastic,_transcript_variant_X2	Olive	PF00004:ATPase_family_associated_with_various_cellular_activities_(AAA)//PF17862:AAA+_lid_domain//PF06480:FtsH_Extracellular	IPR005202:Transcription factor GRAS
LOC111401125	XP_022884472.1	probable_inactive_ATP-dependent_zinc_metalloprotease_FTSHI_4,_chloroplastic,_transcript_variant_X2	Olive	PF00004:ATPase_family_associated_with_various_cellular_activities_(AAA)//PF17862:AAA+_lid_domain	IPR036758:At5g01610-like superfamily
LOC111388397		probable_inactive_ATP-dependent_zinc_metalloprotease_FTSHI_5,_chloroplastic	Olive		IPR037013:Glutathione synthase, substrate-binding domain superfamily
LOC111409022	XP_022894684.1	probable_isoaspartyl_peptidase/L-asparaginase_2	Olive	PF01112:Asparaginase
LOC111395487	XP_022877267.1	probable_membrane_metalloprotease_ARASP2,_chloroplastic	Olive	PF02163:Peptidase_family_M50	IPR036397:Ribonuclease H superfamily
LOC111381687	XP_022861266.1	probable_mitochondrial-processing_peptidase_subunit_beta,_mitochondrial	Olive	PF00675:Insulinase_(Peptidase_family_M16)//PF05193:Peptidase_M16_inactive_domain	IPR036188:FAD/NAD(P)-binding domain superfamily//IPR007526:SWIRM domain//IPR036388:Winged helix-like DNA-binding domain superfamily//IPR009057:Homeobox-like domain superfamily
LOC111397874	XP_022880611.1	probable_mitochondrial-processing_peptidase_subunit_beta,_mitochondrial	Olive	PF05193:Peptidase_M16_inactive_domain
LOC111397216	XP_022879776.1	probable_serine_protease_EDA2,_transcript_variant_X2	Olive	PF05577:Serine_carboxypeptidase_S28	IPR001251:CRAL-TRIO lipid binding domain//IPR036865:CRAL-TRIO lipid binding domain superfamily
LOC111386385	XP_022866611.1	probable_signal_peptidase_complex_subunit_2	Olive	PF06703:Microsomal_signal_peptidase_25_kDa_subunit_(SPC25)	IPR003441:NAC domain//IPR036093:NAC domain superfamily
LOC111385384		probable_signal_peptidase_complex_subunit_2	Olive		IPR027443:Isopenicillin N synthase-like
LOC111401948	XP_022885716.1	probable_thimet_oligopeptidase,_transcript_variant_X2	Olive	PF01432:Peptidase_family_M3	IPR034891:Protein NLP, PB1 domain//IPR003035:RWP-RK domain//IPR000270:PB1 domain
LOC111383562	XP_022863445.1	probable_Xaa-Pro_aminopeptidase_P	Olive	PF01321:Creatinase/Prolidase_N-terminal_domain//PF00557:Metallopeptidase_family_M24//PF16189:Creatinase/Prolidase_N-terminal_domain//PF16188:C-terminal_region_of_peptidase_M24	IPR021109:Aspartic peptidase domain superfamily//IPR001969:Aspartic peptidase, active site//IPR033121:Peptidase family A1 domain
LOC111379632	XP_022858823.1	probable_Xaa-Pro_aminopeptidase_P	Olive	PF16188:C-terminal_region_of_peptidase_M24//PF01321:Creatinase/Prolidase_N-terminal_domain//PF00557:Metallopeptidase_family_M24	IPR002885:Pentatricopeptide repeat//IPR011990:Tetratricopeptide-like helical domain superfamily
LOC111389377	XP_022870069.1	probable_Xaa-Pro_aminopeptidase_P	Olive	PF16189:Creatinase/Prolidase_N-terminal_domain	IPR000719:Protein kinase domain//IPR017441:Protein kinase, ATP binding site//IPR011009:Protein kinase-like domain superfamily//IPR008271:Serine/threonine-protein kinase, active site
LOC111386155		probable_Xaa-Pro_aminopeptidase_P	Olive
LOC111394654	XP_022876340.1	probable_zinc_metallopeptidase_EGY3,_chloroplastic	Olive
LOC111412574	XP_022899278.1	proline_iminopeptidase	Olive	PF00561:alpha/beta_hydrolase_fold
LOC111390353	XP_022871149.1	proline_iminopeptidase	Olive	PF00561:alpha/beta_hydrolase_fold
LOC111412574	XP_022899278.1	proline_iminopeptidase	Olive	PF00561:alpha/beta_hydrolase_fold	IPR000073:Alpha/beta hydrolase fold-1//IPR029058:Alpha/Beta hydrolase fold//IPR005944:Proline iminopeptidase//IPR002410:Peptidase S33
LOC111380943	XP_022860388.1	prolyl_endopeptidase-like	Olive	PF00326:Prolyl_oligopeptidase_family//PF02897:Prolyl_oligopeptidase,_N-terminal_beta-propeller_domain	IPR000425:Major intrinsic protein//IPR023271:Aquaporin-like
LOC111399174	XP_022882211.1	protease_2,_transcript_variant_X2	Olive	PF00326:Prolyl_oligopeptidase_family//PF02897:Prolyl_oligopeptidase,_N-terminal_beta-propeller_domain
LOC111400837	XP_022884036.1	protease_Do-like_1,_chloroplastic	Olive	PF13180:PDZ_domain//PF13365:Trypsin-like_peptidase_domain
LOC111392334	XP_022873427.1	protease_Do-like_1,_chloroplastic	Olive		IPR029058:Alpha/Beta hydrolase fold
LOC111386369		protease_Do-like_1,_chloroplastic	Olive
LOC111392334	XP_022873427.1	protease_Do-like_1,_chloroplastic	Olive		IPR009003:Peptidase S1, PA clan//IPR043504:Peptidase S1, PA clan, chymotrypsin-like fold
LOC111396156	XP_022878246.1	protease_Do-like_10,_mitochondrial,_transcript_variant_X2	Olive	PF13365:Trypsin-like_peptidase_domain//PF17815:PDZ_domain//PF13180:PDZ_domain	IPR036412:HAD-like superfamily//IPR023214:HAD superfamily//IPR008380:HAD-superfamily hydrolase, subfamily IG, 5'-nucleotidase
LOC111405755	XP_022890548.1	protease_Do-like_2,_chloroplastic	Olive	PF17815:PDZ_domain//PF13365:Trypsin-like_peptidase_domain	IPR036412:HAD-like superfamily//IPR006379:HAD-superfamily hydrolase, subfamily IIB//IPR023214:HAD superfamily//IPR003337:Trehalose-phosphatase
LOC111370938	XP_022848612.1	protease_Do-like_5,_chloroplastic,_transcript_variant_X2	Olive	PF13365:Trypsin-like_peptidase_domain	IPR000182:GNAT domain//IPR016181:Acyl-CoA N-acyltransferase
LOC111372634	XP_022850784.1	protease_Do-like_7	Olive	PF13365:Trypsin-like_peptidase_domain//PF13180:PDZ_domain//PF12812:PDZ-like_domain	IPR011859:Dihydrodipicolinate reductase, plant-type//IPR036291:NAD(P)-binding domain superfamily
LOC111367362	XP_022843952.1	protease_Do-like_7,_transcript_variant_X2	Olive	PF13365:Trypsin-like_peptidase_domain//PF13180:PDZ_domain//PF12812:PDZ-like_domain	IPR006458:Ovate protein family, C-terminal
LOC111400897	XP_022884119.1	protease_Do-like_8,_chloroplastic,_transcript_variant_X2	Olive	PF13180:PDZ_domain//PF13365:Trypsin-like_peptidase_domain	IPR015943:WD40/YVTN repeat-like-containing domain superfamily//IPR000009:Protein phosphatase 2A regulatory subunit PR55//IPR036322:WD40-repeat-containing domain superfamily//IPR018067:Protein phosphatase 2A regulatory subunit PR55, conserved site//IPR019775:WD40 repeat, conserved site//IPR001680:WD40 repeat
LOC111383100	XP_022862939.1	protease_Do-like_9,_transcript_variant_X3	Olive	PF17815:PDZ_domain//PF13365:Trypsin-like_peptidase_domain	IPR018247:EF-Hand 1, calcium-binding site//IPR011992:EF-hand domain pair//IPR002048:EF-hand domain
LOC111376902	XP_022855684.1	protease_Do-like_9,_transcript_variant_X5	Olive	PF13365:Trypsin-like_peptidase_domain//PF17815:PDZ_domain	IPR003657:WRKY domain//IPR036576:WRKY domain superfamily
LOC111400764	XP_022883923.1	protease_HtpX_homolog,_transcript_variant_X2	Olive	PF01435:Peptidase_family_M48	IPR002067:Mitochondrial carrier protein//IPR023395:Mitochondrial carrier domain superfamily//IPR018108:Mitochondrial substrate/solute carrier
LOC111403101	XP_022887248.1	protein_ABHD11	Olive	PF12697:Alpha/beta_hydrolase_family	IPR008580:PPPDE putative peptidase domain//IPR042266:PPPDE putative peptidase domain superfamily
LOC111366349	XP_022842869.1	protein_ABHD13-like,_transcript_variant_X2	Olive	PF00326:Prolyl_oligopeptidase_family	IPR029055:Nucleophile aminohydrolases, N-terminal
LOC111404200	XP_022888739.1	protein_ABHD17B-like	Olive	PF12146:Serine_aminopeptidase,_S33	IPR008271:Serine/threonine-protein kinase, active site//IPR032675:Leucine-rich repeat domain superfamily//IPR011009:Protein kinase-like domain superfamily//IPR000719:Protein kinase domain//IPR017441:Protein kinase, ATP binding site
LOC111401054	XP_022884360.1	protein_ABHD17B-like,_transcript_variant_X2	Olive	PF12146:Serine_aminopeptidase,_S33
LOC111401714	XP_022885339.1	protein_ABHD17C-like	Olive	PF12146:Serine_aminopeptidase,_S33
LOC111400944	XP_022884190.1	protein_ABHD17C-like,_transcript_variant_X2	Olive	PF12146:Serine_aminopeptidase,_S33
LOC111367890	XP_022844758.1	protein_ABHD17C-like,_transcript_variant_X3	Olive	PF12146:Serine_aminopeptidase,_S33	IPR036291:NAD(P)-binding domain superfamily//IPR015955:Lactate dehydrogenase/glycoside hydrolase, family 4, C-terminal//IPR001557:L-lactate/malate dehydrogenase//IPR010097:Malate dehydrogenase, type 1//IPR001252:Malate dehydrogenase, active site
LOC111399036	XP_022882007.1	protein_ASPARTIC_PROTEASE_IN_GUARD_CELL_1	Olive	PF14543:Xylanase_inhibitor_N-terminal//PF14541:Xylanase_inhibitor_C-terminal	IPR003891:Initiation factor eIF-4 gamma, MA3//IPR016021:MIF4G-like domain superfamily//IPR016024:Armadillo-type fold//IPR003890:MIF4G-like, type 3
LOC111393729	XP_022875179.1	protein_ASPARTIC_PROTEASE_IN_GUARD_CELL_2-like	Olive	PF14541:Xylanase_inhibitor_C-terminal//PF14543:Xylanase_inhibitor_N-terminal	IPR008271:Serine/threonine-protein kinase, active site//IPR000719:Protein kinase domain//IPR017441:Protein kinase, ATP binding site//IPR011009:Protein kinase-like domain superfamily
LOC111382581	XP_022862368.1	protein_ASPARTIC_PROTEASE_IN_GUARD_CELL_2-like	Olive	PF14543:Xylanase_inhibitor_N-terminal//PF14541:Xylanase_inhibitor_C-terminal	IPR035996:Tetrapyrrole methylase superfamily//IPR014777:Tetrapyrrole methylase, subdomain 1//IPR003043:Uroporphiryn-III C-methyltransferase, conserved site//IPR014776:Tetrapyrrole methylase, subdomain 2//IPR006366:Uroporphyrin-III C-methyltransferase
LOC111373900	XP_022852264.1	proteinase_inhibitor_PSI-1.2-like	Olive	PF02428:Potato_type_II_proteinase_inhibitor_family
LOC111394394	XP_022875960.1	proteinase_inhibitor_PSI-1.2-like,_transcript_variant_X2	Olive	PF02428:Potato_type_II_proteinase_inhibitor_family	IPR006603:PQ-loop repeat
LOC111411007	XP_022897354.1	proteinase_inhibitor-like	Olive	PF00280:Potato_inhibitor_I_family	IPR036354:Proteinase inhibitor I13, potato inhibitor I superfamily
LOC111407575	XP_022892926.1	puromycin-sensitive_aminopeptidase-like,_transcript_variant_X9	Olive	PF17432:Domain_of_unknown_function_(DUF3458_C)_ARM_repeats//PF17900:Peptidase_M1_N-terminal_domain//PF11940:Domain_of_unknown_function_(DUF3458)_Ig-like_fold//PF01433:Peptidase_family_M1_domain
LOC111382780	XP_022862585.1	putative_glutamine_amidotransferase_GAT1_2.1	Olive	PF07722:Peptidase_C26	IPR027417:P-loop containing nucleoside triphosphate hydrolase//IPR000048:IQ motif, EF-hand binding site//IPR001609:Myosin head, motor domain//IPR036961:Kinesin motor domain superfamily//IPR004009:Myosin, N-terminal, SH3-like//IPR002710:Dilute domain//IPR036018:Plant myosin, class XI, motor domain
LOC111408738	XP_022894269.1	putative_glutamine_amidotransferase_GAT1_2.1	Olive	PF07722:Peptidase_C26	IPR006564:Zinc finger, PMZ-type//IPR007527:Zinc finger, SWIM-type
LOC111401261	XP_022884696.1	putative_GPI-anchor_transamidase,_transcript_variant_X9	Olive	PF01650:Peptidase_C13_family	IPR010920:LSM domain superfamily
LOC111386814		putative_protease_Do-like_14	Olive		IPR041985:Ribosomal protein L14, KOW motif//IPR014722:Ribosomal protein L2, domain 2//IPR008991:Translation protein SH3-like domain superfamily
LOC111394619	XP_022876297.1	putative_serine_carboxypeptidase-like_23,_transcript_variant_X2	Olive	PF00450:Serine_carboxypeptidase
LOC111372423	XP_022850537.1	putative_serine_carboxypeptidase-like_52	Olive	PF00450:Serine_carboxypeptidase
LOC111393764	XP_022875226.1	putative_SOS_response-associated_peptidase_YoqW,_transcript_variant_X2	Olive	PF02586:SOS_response_associated_peptidase_(SRAP)	IPR019798:Serine hydroxymethyltransferase, pyridoxal phosphate binding site//IPR015422:Pyridoxal phosphate-dependent transferase domain 1//IPR015424:Pyridoxal phosphate-dependent transferase//IPR001085:Serine hydroxymethyltransferase//IPR015421:Pyridoxal phosphate-dependent transferase, major domain
LOC111370541	XP_022848057.1	senescence-specific_cysteine_protease_SAG39-like,_transcript_variant_X2	Olive	PF00112:Papain_family_cysteine_protease//PF08246:Cathepsin_propeptide_inhibitor_domain_(I29)	IPR000916:Bet v I/Major latex protein//IPR023393:START-like domain superfamily
LOC111411489	XP_022897780.1	separase	Olive	PF03568:Peptidase_family_C50	IPR002813:Arginine biosynthesis protein ArgJ//IPR016117:ArgJ-like domain superfamily//IPR042195:ArgJ beta chain, C-terminal domain
LOC111381982	XP_022861604.1	serine_carboxypeptidase_24-like	Olive	PF00450:Serine_carboxypeptidase	IPR036291:NAD(P)-binding domain superfamily
LOC111385691	XP_022865881.1	serine_carboxypeptidase_3-like	Olive	PF00450:Serine_carboxypeptidase	IPR001563:Peptidase S10, serine carboxypeptidase//IPR029058:Alpha/Beta hydrolase fold
LOC111399929	XP_022883182.1	serine_carboxypeptidase_II-2-like	Olive	PF00450:Serine_carboxypeptidase	IPR001563:Peptidase S10, serine carboxypeptidase//IPR033124:Serine carboxypeptidases, histidine active site//IPR029058:Alpha/Beta hydrolase fold//IPR018202:Serine carboxypeptidase, serine active site
LOC111403799	XP_022888188.1	serine_carboxypeptidase_II-2-like,_transcript_variant_X2	Olive	PF00450:Serine_carboxypeptidase	IPR005818:Linker histone H1/H5, domain H15//IPR005819:Linker histone H1/H5//IPR036390:Winged helix DNA-binding domain superfamily//IPR036388:Winged helix-like DNA-binding domain superfamily
LOC111382425	XP_022862167.1	serine_carboxypeptidase-like	Olive	PF00450:Serine_carboxypeptidase
LOC111405436	XP_022890082.1	serine_carboxypeptidase-like	Olive	PF00450:Serine_carboxypeptidase
LOC111369256		serine_carboxypeptidase-like	Olive
LOC111403536	XP_022887850.1	serine_carboxypeptidase-like	Olive	PF00450:Serine_carboxypeptidase	IPR033124:Serine carboxypeptidases, histidine active site//IPR001563:Peptidase S10, serine carboxypeptidase//IPR018202:Serine carboxypeptidase, serine active site//IPR029058:Alpha/Beta hydrolase fold
LOC111368868	XP_022846116.1	serine_carboxypeptidase-like_11	Olive	PF00450:Serine_carboxypeptidase
LOC111401376	XP_022884850.1	serine_carboxypeptidase-like_11,_transcript_variant_X3	Olive	PF00450:Serine_carboxypeptidase	IPR011598:Myc-type, basic helix-loop-helix (bHLH) domain//IPR036638:Helix-loop-helix DNA-binding domain superfamily
LOC111381757	XP_022861349.1	serine_carboxypeptidase-like_17,_transcript_variant_X7	Olive	PF00450:Serine_carboxypeptidase	IPR002487:Transcription factor, K-box
LOC111372429	XP_022850554.1	serine_carboxypeptidase-like_17,_transcript_variant_X9	Olive	PF00450:Serine_carboxypeptidase	IPR001356:Homeobox domain//IPR009057:Homeobox-like domain superfamily//IPR006563:POX domain
LOC111382605	XP_022862402.1	serine_carboxypeptidase-like_18	Olive	PF00450:Serine_carboxypeptidase
LOC111372067	XP_022849992.1	serine_carboxypeptidase-like_18	Olive	PF00450:Serine_carboxypeptidase	IPR014721:Ribosomal protein S5 domain 2-type fold, subgroup//IPR020568:Ribosomal protein S5 domain 2-type fold
LOC111410659	XP_022896879.1	serine_carboxypeptidase-like_18	Olive	PF00450:Serine_carboxypeptidase	IPR017930:Myb domain//IPR009057:Homeobox-like domain superfamily//IPR006447:Myb domain, plants
LOC111368866	XP_022846114.1	serine_carboxypeptidase-like_18	Olive	PF00450:Serine_carboxypeptidase	IPR020841:Polyketide synthase, beta-ketoacyl synthase domain//IPR016039:Thiolase-like//IPR018201:Beta-ketoacyl synthase, active site//IPR017568:3-oxoacyl-[acyl-carrier-protein] synthase 2
LOC111399785	XP_022883038.1	serine_carboxypeptidase-like_18,_transcript_variant_X4	Olive	PF00450:Serine_carboxypeptidase	IPR033124:Serine carboxypeptidases, histidine active site//IPR029058:Alpha/Beta hydrolase fold//IPR001563:Peptidase S10, serine carboxypeptidase
LOC111387494	XP_022867822.1	serine_carboxypeptidase-like_2	Olive	PF00450:Serine_carboxypeptidase	IPR042201:Formin, FH2 domain superfamily//IPR015425:Formin, FH2 domain
LOC111393751	XP_022875209.1	serine_carboxypeptidase-like_20	Olive	PF00450:Serine_carboxypeptidase	IPR005491:ENT domain//IPR036142:ENT domain-like superfamily
LOC111403133	XP_022887298.1	serine_carboxypeptidase-like_20	Olive	PF00450:Serine_carboxypeptidase	IPR029058:Alpha/Beta hydrolase fold//IPR033124:Serine carboxypeptidases, histidine active site//IPR001563:Peptidase S10, serine carboxypeptidase//IPR018202:Serine carboxypeptidase, serine active site
LOC111374564	XP_022853014.1	serine_carboxypeptidase-like_25	Olive	PF00450:Serine_carboxypeptidase	IPR029058:Alpha/Beta hydrolase fold//IPR018202:Serine carboxypeptidase, serine active site//IPR033124:Serine carboxypeptidases, histidine active site//IPR001563:Peptidase S10, serine carboxypeptidase
LOC111405452	XP_022890114.1	serine_carboxypeptidase-like_27,_transcript_variant_X3	Olive	PF00450:Serine_carboxypeptidase	IPR023393:START-like domain superfamily
LOC111402333	XP_022886330.1	serine_carboxypeptidase-like_31	Olive	PF00450:Serine_carboxypeptidase
LOC111402340	XP_022886337.1	serine_carboxypeptidase-like_31,_transcript_variant_X2	Olive	PF00450:Serine_carboxypeptidase	IPR036220:UDP-glucose/GDP-mannose dehydrogenase, C-terminal domain superfamily//IPR008927:6-phosphogluconate dehydrogenase-like, C-terminal domain superfamily//IPR017476:UDP-glucose/GDP-mannose dehydrogenase//IPR014027:UDP-glucose/GDP-mannose dehydrogenase, C-terminal//IPR036291:NAD(P)-binding domain superfamily//IPR028356:UDP-glucose 6-dehydrogenase, eukaryotic type
LOC111386326	XP_022866558.1	serine_carboxypeptidase-like_40	Olive	PF00450:Serine_carboxypeptidase
LOC111374514	XP_022852953.1	serine_carboxypeptidase-like_42	Olive	PF00450:Serine_carboxypeptidase
LOC111373999	XP_022852368.1	serine_carboxypeptidase-like_45	Olive	PF00450:Serine_carboxypeptidase	IPR001623:DnaJ domain//IPR036869:Chaperone J-domain superfamily
LOC111373313	XP_022851592.1	serine_carboxypeptidase-like_45	Olive	PF00450:Serine_carboxypeptidase
LOC111402579	XP_022886757.1	serine_carboxypeptidase-like_45	Olive	PF00450:Serine_carboxypeptidase	IPR001623:DnaJ domain//IPR036869:Chaperone J-domain superfamily//IPR018253:DnaJ domain, conserved site
LOC111373313	XP_022851592.1	serine_carboxypeptidase-like_45	Olive	PF00450:Serine_carboxypeptidase	IPR029058:Alpha/Beta hydrolase fold//IPR033124:Serine carboxypeptidases, histidine active site//IPR018202:Serine carboxypeptidase, serine active site//IPR001563:Peptidase S10, serine carboxypeptidase
LOC111373999	XP_022852368.1	serine_carboxypeptidase-like_45	Olive	PF00450:Serine_carboxypeptidase	IPR033124:Serine carboxypeptidases, histidine active site//IPR029058:Alpha/Beta hydrolase fold//IPR018202:Serine carboxypeptidase, serine active site//IPR001563:Peptidase S10, serine carboxypeptidase
LOC111402101	XP_022885949.1	serine_carboxypeptidase-like_45,_transcript_variant_X2	Olive	PF00450:Serine_carboxypeptidase	IPR008271:Serine/threonine-protein kinase, active site//IPR017441:Protein kinase, ATP binding site//IPR000719:Protein kinase domain//IPR011009:Protein kinase-like domain superfamily
LOC111400468	XP_022883652.1	serine_carboxypeptidase-like_48	Olive	PF00450:Serine_carboxypeptidase	IPR012392:Very-long-chain 3-ketoacyl-CoA synthase//IPR016039:Thiolase-like
LOC111372490	XP_022850610.1	serine_carboxypeptidase-like_48	Olive	PF00450:Serine_carboxypeptidase	IPR029058:Alpha/Beta hydrolase fold//IPR033124:Serine carboxypeptidases, histidine active site//IPR018202:Serine carboxypeptidase, serine active site//IPR001563:Peptidase S10, serine carboxypeptidase
LOC111400468	XP_022883652.1	serine_carboxypeptidase-like_48	Olive	PF00450:Serine_carboxypeptidase	IPR033124:Serine carboxypeptidases, histidine active site//IPR029058:Alpha/Beta hydrolase fold//IPR001563:Peptidase S10, serine carboxypeptidase
LOC111383379	XP_022863255.1	serine_carboxypeptidase-like_50	Olive	PF00450:Serine_carboxypeptidase	IPR012389:Cyclin P/U//IPR036915:Cyclin-like superfamily
LOC111371333	XP_022849021.1	serine_carboxypeptidase-like_50	Olive	PF00450:Serine_carboxypeptidase	IPR017441:Protein kinase, ATP binding site//IPR011009:Protein kinase-like domain superfamily//IPR028375:KA1 domain/Ssp2, C-terminal//IPR000719:Protein kinase domain//IPR008271:Serine/threonine-protein kinase, active site//IPR018451:NAF/FISL domain
LOC111396591	XP_022878768.1	serine_carboxypeptidase-like_50	Olive	PF00450:Serine_carboxypeptidase
LOC111383379	XP_022863255.1	serine_carboxypeptidase-like_50	Olive	PF00450:Serine_carboxypeptidase	IPR001563:Peptidase S10, serine carboxypeptidase//IPR018202:Serine carboxypeptidase, serine active site//IPR029058:Alpha/Beta hydrolase fold
LOC111371333	XP_022849021.1	serine_carboxypeptidase-like_50	Olive	PF00450:Serine_carboxypeptidase	IPR029058:Alpha/Beta hydrolase fold//IPR001563:Peptidase S10, serine carboxypeptidase//IPR018202:Serine carboxypeptidase, serine active site
LOC111379918	XP_022859132.1	serine_carboxypeptidase-like_51	Olive	PF00450:Serine_carboxypeptidase
LOC111381136	XP_022860646.1	serine_carboxypeptidase-like_51	Olive	PF00450:Serine_carboxypeptidase	IPR002347:Short-chain dehydrogenase/reductase SDR//IPR036291:NAD(P)-binding domain superfamily
LOC111372420	XP_022850530.1	serine_carboxypeptidase-like_7	Olive	PF00450:Serine_carboxypeptidase	IPR032675:Leucine-rich repeat domain superfamily//IPR027417:P-loop containing nucleoside triphosphate hydrolase
LOC111372393	XP_022850506.1	serine_carboxypeptidase-like_7	Olive	PF00450:Serine_carboxypeptidase	IPR032675:Leucine-rich repeat domain superfamily//IPR001611:Leucine-rich repeat
LOC111368864	XP_022846113.1	serine_carboxypeptidase-like_7	Olive	PF00450:Serine_carboxypeptidase	IPR036330:Oligosaccharyltransferase subunit ost4p superfamily
LOC111372420	XP_022850530.1	serine_carboxypeptidase-like_7	Olive	PF00450:Serine_carboxypeptidase	IPR001563:Peptidase S10, serine carboxypeptidase//IPR029058:Alpha/Beta hydrolase fold//IPR018202:Serine carboxypeptidase, serine active site
LOC111368863	XP_022846112.1	serine_carboxypeptidase-like_7,_transcript_variant_X2	Olive	PF00450:Serine_carboxypeptidase
LOC111391244	XP_022872180.1	serine_protease_SPPA,_chloroplastic-like	Olive	PF01343:Peptidase_family_S49	IPR011333:SKP1/BTB/POZ domain superfamily//IPR027356:NPH3 domain
LOC111401883	XP_022885616.1	serine_protease_SPPA,_chloroplastic-like	Olive	PF01343:Peptidase_family_S49
LOC111367436	XP_022844073.1	serpin-ZX-like	Olive	PF00079:Serpin_(serine_protease_inhibitor)	IPR003851:Zinc finger, Dof-type
LOC111385505	XP_022865665.1	signal_peptidase_complex_subunit_3A-like	Olive	PF04573:Signal_peptidase_subunit	IPR006822:Coatomer, epsilon subunit//IPR011990:Tetratricopeptide-like helical domain superfamily
LOC111408853	XP_022894432.1	signal_peptidase_complex-like_protein_DTM1,_transcript_variant_X2	Olive	PF06645:Microsomal_signal_peptidase_12_kDa_subunit_(SPC12)	IPR037431:RNA exonuclease 4, DEDDh 3'-5' exonuclease domain//IPR013087:Zinc finger C2H2-type//IPR013520:Exonuclease, RNase T/DNA polymerase III//IPR012337:Ribonuclease H-like superfamily//IPR036397:Ribonuclease H superfamily
LOC111400801	XP_022883982.1	signal_peptide_peptidase_1-like,_transcript_variant_X2	Olive	PF04258:Signal_peptide_peptidase	IPR006639:Presenilin/signal peptide peptidase
LOC111411902	XP_022898328.1	signal_peptide_peptidase-like	Olive	PF04258:Signal_peptide_peptidase	IPR003195:Transcription initiation factor IID, subunit 13//IPR009072:Histone-fold
LOC111386408	XP_022866631.1	signal_peptide_peptidase-like,_transcript_variant_X2	Olive	PF04258:Signal_peptide_peptidase	IPR036259:MFS transporter superfamily
LOC111396704	XP_022878953.1	signal_peptide_peptidase-like_1,_transcript_variant_X2	Olive	PF04258:Signal_peptide_peptidase
LOC111393968	XP_022875528.1	signal_peptide_peptidase-like_2	Olive	PF02225:PA_domain//PF04258:Signal_peptide_peptidase	IPR036638:Helix-loop-helix DNA-binding domain superfamily//IPR011598:Myc-type, basic helix-loop-helix (bHLH) domain
LOC111369172	XP_022846416.1	signal_peptide_peptidase-like_3	Olive	PF04258:Signal_peptide_peptidase//PF02225:PA_domain	IPR029044:Nucleotide-diphospho-sugar transferases
LOC111380283	XP_022859563.1	signal_peptide_peptidase-like_4	Olive	PF04258:Signal_peptide_peptidase	IPR000850:Adenylate kinase/UMP-CMP kinase//IPR027417:P-loop containing nucleoside triphosphate hydrolase
LOC111376352		signal_peptide_peptidase-like_4	Olive		IPR019835:SWIB domain//IPR036885:SWIB/MDM2 domain superfamily
LOC111380283	XP_022859563.1	signal_peptide_peptidase-like_4	Olive	PF04258:Signal_peptide_peptidase	IPR006639:Presenilin/signal peptide peptidase
LOC111376352		signal_peptide_peptidase-like_4	Olive
LOC111411721	XP_022898061.1	signal_peptide_peptidase-like_4	Olive	PF02225:PA_domain//PF04258:Signal_peptide_peptidase	IPR006639:Presenilin/signal peptide peptidase
LOC111380164	XP_022859421.1	subtilisin-like_protease_SBT1.1	Olive	PF05922:Peptidase_inhibitor_I9//PF00082:Subtilase_family//PF17766:Fibronectin_type-III_domain//PF02225:PA_domain	IPR006539:P-type ATPase, subfamily IV//IPR001757:P-type ATPase//IPR008250:P-type ATPase, A domain superfamily//IPR018303:P-type ATPase, phosphorylation site//IPR036412:HAD-like superfamily//IPR023299:P-type ATPase, cytoplasmic domain N//IPR023214:HAD superfamily//IPR023298:P-type ATPase, transmembrane domain superfamily
LOC111372971	XP_022851182.1	subtilisin-like_protease_SBT1.2	Olive	PF00082:Subtilase_family//PF02225:PA_domain//PF17766:Fibronectin_type-III_domain//PF05922:Peptidase_inhibitor_I9
LOC111407513	XP_022892810.1	subtilisin-like_protease_SBT1.2	Olive	PF00082:Subtilase_family//PF05922:Peptidase_inhibitor_I9//PF17766:Fibronectin_type-III_domain//PF02225:PA_domain	IPR029035:DHS-like NAD/FAD-binding domain superfamily//IPR036982:Deoxyhypusine synthase superfamily//IPR002773:Deoxyhypusine synthase
LOC111403915	XP_022888348.1	subtilisin-like_protease_SBT1.3	Olive	PF00082:Subtilase_family//PF17766:Fibronectin_type-III_domain//PF02225:PA_domain//PF05922:Peptidase_inhibitor_I9	IPR022636:S-adenosylmethionine synthetase superfamily
LOC111402276	XP_022886218.1	subtilisin-like_protease_SBT1.4	Olive	PF00082:Subtilase_family//PF05922:Peptidase_inhibitor_I9//PF02225:PA_domain//PF17766:Fibronectin_type-III_domain
LOC111387773	XP_022868130.1	subtilisin-like_protease_SBT1.4	Olive	PF05922:Peptidase_inhibitor_I9//PF17766:Fibronectin_type-III_domain//PF00082:Subtilase_family//PF02225:PA_domain	IPR023271:Aquaporin-like//IPR022357:Major intrinsic protein, conserved site//IPR000425:Major intrinsic protein
LOC111403579	XP_022887944.1	subtilisin-like_protease_SBT1.5	Olive	PF00082:Subtilase_family//PF17766:Fibronectin_type-III_domain//PF05922:Peptidase_inhibitor_I9	IPR002173:Carbohydrate/purine kinase, PfkB, conserved site//IPR002139:Ribokinase/fructokinase//IPR029056:Ribokinase-like
LOC111375971	XP_022854658.1	subtilisin-like_protease_SBT1.5	Olive	PF02225:PA_domain//PF00082:Subtilase_family//PF13976:GAG-pre-integrase_domain//PF05922:Peptidase_inhibitor_I9//PF17766:Fibronectin_type-III_domain	IPR023828:Peptidase S8, subtilisin, Ser-active site//IPR036852:Peptidase S8/S53 domain superfamily//IPR037045:Peptidase S8 propeptide/proteinase inhibitor I9 superfamily//IPR034197:Cucumisin-like catalytic domain//IPR015500:Peptidase S8, subtilisin-related
LOC111403579	XP_022887944.1	subtilisin-like_protease_SBT1.5	Olive	PF00082:Subtilase_family//PF17766:Fibronectin_type-III_domain//PF05922:Peptidase_inhibitor_I9	IPR023828:Peptidase S8, subtilisin, Ser-active site//IPR036852:Peptidase S8/S53 domain superfamily
LOC111372582	XP_022850724.1	subtilisin-like_protease_SBT1.6	Olive	PF00082:Subtilase_family//PF17766:Fibronectin_type-III_domain	IPR029044:Nucleotide-diphospho-sugar transferases
LOC111374885	XP_022853412.1	subtilisin-like_protease_SBT1.6	Olive	PF02225:PA_domain//PF00082:Subtilase_family//PF05922:Peptidase_inhibitor_I9//PF17766:Fibronectin_type-III_domain
LOC111410115	XP_022896089.1	subtilisin-like_protease_SBT1.6	Olive	PF05922:Peptidase_inhibitor_I9//PF17766:Fibronectin_type-III_domain//PF00082:Subtilase_family//PF02225:PA_domain	IPR000305:GIY-YIG endonuclease//IPR035901:GIY-YIG endonuclease superfamily
LOC111374885	XP_022853412.1	subtilisin-like_protease_SBT1.6	Olive	PF02225:PA_domain//PF00082:Subtilase_family//PF05922:Peptidase_inhibitor_I9//PF17766:Fibronectin_type-III_domain	IPR037045:Peptidase S8 propeptide/proteinase inhibitor I9 superfamily//IPR023828:Peptidase S8, subtilisin, Ser-active site//IPR034197:Cucumisin-like catalytic domain//IPR015500:Peptidase S8, subtilisin-related//IPR036852:Peptidase S8/S53 domain superfamily
LOC111410115	XP_022896089.1	subtilisin-like_protease_SBT1.6	Olive	PF05922:Peptidase_inhibitor_I9//PF17766:Fibronectin_type-III_domain//PF00082:Subtilase_family//PF02225:PA_domain	IPR036852:Peptidase S8/S53 domain superfamily//IPR015500:Peptidase S8, subtilisin-related//IPR023828:Peptidase S8, subtilisin, Ser-active site//IPR034197:Cucumisin-like catalytic domain//IPR037045:Peptidase S8 propeptide/proteinase inhibitor I9 superfamily
LOC111409644	XP_022895442.1	subtilisin-like_protease_SBT1.7	Olive	PF02225:PA_domain//PF00082:Subtilase_family//PF05922:Peptidase_inhibitor_I9//PF17766:Fibronectin_type-III_domain	IPR036388:Winged helix-like DNA-binding domain superfamily
LOC111366809	XP_022843272.1	subtilisin-like_protease_SBT1.7	Olive	PF05922:Peptidase_inhibitor_I9//PF17766:Fibronectin_type-III_domain//PF00082:Subtilase_family	IPR020846:Major facilitator superfamily domain//IPR036259:MFS transporter superfamily
LOC111389318	XP_022870004.1	subtilisin-like_protease_SBT1.7	Olive	PF17766:Fibronectin_type-III_domain//PF00082:Subtilase_family//PF02225:PA_domain//PF05922:Peptidase_inhibitor_I9	IPR001206:Diacylglycerol kinase, catalytic domain//IPR017438:Inorganic polyphosphate/ATP-NAD kinase, N-terminal//IPR016064:NAD kinase/diacylglycerol kinase-like domain superfamily//IPR000756:Diacylglycerol kinase, accessory domain
LOC111366809	XP_022843272.1	subtilisin-like_protease_SBT1.7	Olive	PF05922:Peptidase_inhibitor_I9//PF17766:Fibronectin_type-III_domain//PF00082:Subtilase_family	IPR036852:Peptidase S8/S53 domain superfamily//IPR034197:Cucumisin-like catalytic domain//IPR023828:Peptidase S8, subtilisin, Ser-active site//IPR037045:Peptidase S8 propeptide/proteinase inhibitor I9 superfamily//IPR015500:Peptidase S8, subtilisin-related
LOC111409644	XP_022895442.1	subtilisin-like_protease_SBT1.7	Olive	PF02225:PA_domain//PF00082:Subtilase_family//PF05922:Peptidase_inhibitor_I9//PF17766:Fibronectin_type-III_domain	IPR036852:Peptidase S8/S53 domain superfamily//IPR037045:Peptidase S8 propeptide/proteinase inhibitor I9 superfamily//IPR034197:Cucumisin-like catalytic domain//IPR023828:Peptidase S8, subtilisin, Ser-active site//IPR015500:Peptidase S8, subtilisin-related
LOC111389318	XP_022870004.1	subtilisin-like_protease_SBT1.7	Olive	PF17766:Fibronectin_type-III_domain//PF00082:Subtilase_family//PF02225:PA_domain//PF05922:Peptidase_inhibitor_I9	IPR015500:Peptidase S8, subtilisin-related//IPR036852:Peptidase S8/S53 domain superfamily//IPR034197:Cucumisin-like catalytic domain//IPR023828:Peptidase S8, subtilisin, Ser-active site//IPR037045:Peptidase S8 propeptide/proteinase inhibitor I9 superfamily
LOC111397017	XP_022879447.1	subtilisin-like_protease_SBT1.7,_transcript_variant_X3	Olive	PF05922:Peptidase_inhibitor_I9//PF00082:Subtilase_family//PF17766:Fibronectin_type-III_domain//PF02225:PA_domain	IPR023395:Mitochondrial carrier domain superfamily//IPR018108:Mitochondrial substrate/solute carrier
LOC111411447	XP_022897749.1	subtilisin-like_protease_SBT1.8	Olive	PF00082:Subtilase_family//PF05922:Peptidase_inhibitor_I9//PF17766:Fibronectin_type-III_domain//PF02225:PA_domain
LOC111368621	XP_022845741.1	subtilisin-like_protease_SBT1.8	Olive	PF02225:PA_domain//PF05922:Peptidase_inhibitor_I9//PF00082:Subtilase_family//PF17766:Fibronectin_type-III_domain
LOC111411447	XP_022897749.1	subtilisin-like_protease_SBT1.8	Olive	PF00082:Subtilase_family//PF05922:Peptidase_inhibitor_I9//PF17766:Fibronectin_type-III_domain//PF02225:PA_domain	IPR036852:Peptidase S8/S53 domain superfamily//IPR034197:Cucumisin-like catalytic domain//IPR037045:Peptidase S8 propeptide/proteinase inhibitor I9 superfamily//IPR015500:Peptidase S8, subtilisin-related//IPR023828:Peptidase S8, subtilisin, Ser-active site
LOC111368621	XP_022845741.1	subtilisin-like_protease_SBT1.8	Olive	PF02225:PA_domain//PF05922:Peptidase_inhibitor_I9//PF00082:Subtilase_family//PF17766:Fibronectin_type-III_domain	IPR015500:Peptidase S8, subtilisin-related//IPR036852:Peptidase S8/S53 domain superfamily//IPR037045:Peptidase S8 propeptide/proteinase inhibitor I9 superfamily//IPR034197:Cucumisin-like catalytic domain//IPR023828:Peptidase S8, subtilisin, Ser-active site
LOC111397287	XP_022879901.1	subtilisin-like_protease_SBT1.9	Olive	PF00082:Subtilase_family//PF17766:Fibronectin_type-III_domain//PF05922:Peptidase_inhibitor_I9	IPR036390:Winged helix DNA-binding domain superfamily//IPR001714:Peptidase M24, methionine aminopeptidase//IPR004545:PA2G4 family//IPR036005:Creatinase/aminopeptidase-like//IPR036388:Winged helix-like DNA-binding domain superfamily
LOC111397286	XP_022879899.1	subtilisin-like_protease_SBT1.9	Olive	PF05922:Peptidase_inhibitor_I9//PF00082:Subtilase_family//PF17766:Fibronectin_type-III_domain	IPR001932:PPM-type phosphatase domain//IPR000222:PPM-type phosphatase, divalent cation binding//IPR036457:PPM-type phosphatase domain superfamily
LOC111408800	XP_022894339.1	subtilisin-like_protease_SBT1.9	Olive	PF05922:Peptidase_inhibitor_I9//PF17766:Fibronectin_type-III_domain//PF00082:Subtilase_family	IPR016140:Bifunctional inhibitor/plant lipid transfer protein/seed storage helical domain//IPR000528:Plant lipid transfer protein/Par allergen//IPR036312:Bifunctional inhibitor/plant lipid transfer protein/seed storage helical domain superfamily
LOC111397286	XP_022879899.1	subtilisin-like_protease_SBT1.9	Olive	PF05922:Peptidase_inhibitor_I9//PF00082:Subtilase_family//PF17766:Fibronectin_type-III_domain	IPR023828:Peptidase S8, subtilisin, Ser-active site//IPR015500:Peptidase S8, subtilisin-related//IPR036852:Peptidase S8/S53 domain superfamily//IPR034197:Cucumisin-like catalytic domain//IPR037045:Peptidase S8 propeptide/proteinase inhibitor I9 superfamily
LOC111408800	XP_022894339.1	subtilisin-like_protease_SBT1.9	Olive	PF05922:Peptidase_inhibitor_I9//PF17766:Fibronectin_type-III_domain//PF00082:Subtilase_family	IPR034197:Cucumisin-like catalytic domain//IPR022398:Peptidase S8, subtilisin, His-active site//IPR037045:Peptidase S8 propeptide/proteinase inhibitor I9 superfamily//IPR036852:Peptidase S8/S53 domain superfamily//IPR015500:Peptidase S8, subtilisin-related//IPR023828:Peptidase S8, subtilisin, Ser-active site
LOC111409395	XP_022895215.1	subtilisin-like_protease_SBT1.9	Olive	PF05922:Peptidase_inhibitor_I9//PF17766:Fibronectin_type-III_domain//PF00082:Subtilase_family	IPR015500:Peptidase S8, subtilisin-related//IPR023828:Peptidase S8, subtilisin, Ser-active site//IPR036852:Peptidase S8/S53 domain superfamily//IPR034197:Cucumisin-like catalytic domain//IPR037045:Peptidase S8 propeptide/proteinase inhibitor I9 superfamily
LOC111368699	XP_022845874.1	subtilisin-like_protease_SBT2.2	Olive	PF00082:Subtilase_family//PF17766:Fibronectin_type-III_domain//PF05922:Peptidase_inhibitor_I9	IPR000719:Protein kinase domain//IPR032675:Leucine-rich repeat domain superfamily//IPR011009:Protein kinase-like domain superfamily
LOC111403831	XP_022888225.1	subtilisin-like_protease_SBT2.5	Olive	PF00082:Subtilase_family//PF17766:Fibronectin_type-III_domain//PF05922:Peptidase_inhibitor_I9	IPR006121:Heavy metal-associated domain, HMA//IPR036163:Heavy metal-associated domain superfamily
LOC111404802		subtilisin-like_protease_SBT2.5	Olive		IPR013761:Sterile alpha motif/pointed domain superfamily
LOC111403829	XP_022888224.1	subtilisin-like_protease_SBT2.5,_transcript_variant_X2	Olive	PF00082:Subtilase_family//PF17766:Fibronectin_type-III_domain//PF05922:Peptidase_inhibitor_I9	IPR000626:Ubiquitin-like domain//IPR003103:BAG domain//IPR029071:Ubiquitin-like domain superfamily//IPR036533:BAG domain superfamily
LOC111366066	XP_022842485.1	subtilisin-like_protease_SBT2.5,_transcript_variant_X3	Olive	PF02225:PA_domain//PF17766:Fibronectin_type-III_domain//PF00082:Subtilase_family//PF05922:Peptidase_inhibitor_I9	IPR037045:Peptidase S8 propeptide/proteinase inhibitor I9 superfamily//IPR023828:Peptidase S8, subtilisin, Ser-active site//IPR036852:Peptidase S8/S53 domain superfamily//IPR023827:Peptidase S8, subtilisin, Asp-active site//IPR034197:Cucumisin-like catalytic domain//IPR015500:Peptidase S8, subtilisin-related
LOC111386418	XP_022866650.1	subtilisin-like_protease_SBT3.15	Olive	PF05922:Peptidase_inhibitor_I9
LOC111396733	XP_022878986.1	subtilisin-like_protease_SBT3.17	Olive	PF05922:Peptidase_inhibitor_I9
LOC111396733	XP_022878986.1	subtilisin-like_protease_SBT3.17	Olive	PF05922:Peptidase_inhibitor_I9	IPR037045:Peptidase S8 propeptide/proteinase inhibitor I9 superfamily
LOC111401229	XP_022884642.1	subtilisin-like_protease_SBT3.5,_transcript_variant_X2	Olive	PF17766:Fibronectin_type-III_domain//PF00082:Subtilase_family
LOC111367731	XP_022844531.1	subtilisin-like_protease_SBT3.5,_transcript_variant_X3	Olive	PF17766:Fibronectin_type-III_domain//PF05922:Peptidase_inhibitor_I9//PF00082:Subtilase_family	IPR001810:F-box domain//IPR036047:F-box-like domain superfamily//IPR017451:F-box associated interaction domain
LOC111374920	XP_022853451.1	subtilisin-like_protease_SBT3.6,_transcript_variant_X3	Olive	PF00082:Subtilase_family//PF17766:Fibronectin_type-III_domain	IPR003851:Zinc finger, Dof-type
LOC111399703	XP_022882931.1	subtilisin-like_protease_SBT4.15	Olive	PF05922:Peptidase_inhibitor_I9//PF00082:Subtilase_family//PF17766:Fibronectin_type-III_domain	IPR005225:Small GTP-binding protein domain//IPR027417:P-loop containing nucleoside triphosphate hydrolase
LOC111373327		subtilisin-like_protease_SBT4.15	Olive		IPR027417:P-loop containing nucleoside triphosphate hydrolase//IPR015947:PUA-like superfamily//IPR003111:Lon, substrate-binding domain//IPR008269:Peptidase S16, Lon proteolytic domain//IPR014721:Ribosomal protein S5 domain 2-type fold, subgroup//IPR020568:Ribosomal protein S5 domain 2-type fold//IPR008268:Peptidase S16, active site
LOC111399703	XP_022882931.1	subtilisin-like_protease_SBT4.15	Olive	PF05922:Peptidase_inhibitor_I9//PF00082:Subtilase_family//PF17766:Fibronectin_type-III_domain	IPR036852:Peptidase S8/S53 domain superfamily//IPR015500:Peptidase S8, subtilisin-related//IPR034197:Cucumisin-like catalytic domain//IPR023828:Peptidase S8, subtilisin, Ser-active site//IPR037045:Peptidase S8 propeptide/proteinase inhibitor I9 superfamily
LOC111383057	XP_022862886.1	subtilisin-like_protease_SBT5.3	Olive	PF02225:PA_domain//PF00082:Subtilase_family//PF17766:Fibronectin_type-III_domain	IPR011598:Myc-type, basic helix-loop-helix (bHLH) domain//IPR036638:Helix-loop-helix DNA-binding domain superfamily
LOC111402396	XP_022886428.1	subtilisin-like_protease_SBT5.4	Olive	PF17766:Fibronectin_type-III_domain//PF00082:Subtilase_family//PF02225:PA_domain//PF05922:Peptidase_inhibitor_I9	IPR001005:SANT/Myb domain//IPR017930:Myb domain//IPR009057:Homeobox-like domain superfamily
LOC111373695	XP_022852030.1	subtilisin-like_protease_SBT5.6	Olive	PF17766:Fibronectin_type-III_domain//PF02225:PA_domain//PF00082:Subtilase_family//PF05922:Peptidase_inhibitor_I9	IPR015500:Peptidase S8, subtilisin-related//IPR036852:Peptidase S8/S53 domain superfamily//IPR037045:Peptidase S8 propeptide/proteinase inhibitor I9 superfamily//IPR034197:Cucumisin-like catalytic domain
LOC111381785	XP_022861380.1	thylakoidal_processing_peptidase_1,_chloroplastic-like	Olive	PF10502:Signal_peptidase,_peptidase_S26	IPR019758:Peptidase S26A, signal peptidase I, conserved site//IPR000223:Peptidase S26A, signal peptidase I//IPR019756:Peptidase S26A, signal peptidase I, serine active site//IPR036286:LexA/Signal peptidase-like superfamily
LOC111374232	XP_022852651.1	thylakoidal_processing_peptidase_1,_chloroplastic-like,_transcript_variant_X2	Olive	PF10502:Signal_peptidase,_peptidase_S26//PF00717:Peptidase_S24-like	IPR002710:Dilute domain
LOC111374232	XP_022852651.1	thylakoidal_processing_peptidase_1,_chloroplastic-like,_transcript_variant_X2	Olive	PF10502:Signal_peptidase,_peptidase_S26//PF00717:Peptidase_S24-like	IPR000223:Peptidase S26A, signal peptidase I//IPR019756:Peptidase S26A, signal peptidase I, serine active site//IPR019758:Peptidase S26A, signal peptidase I, conserved site//IPR036286:LexA/Signal peptidase-like superfamily
LOC111402996	XP_022887100.1	tripeptidyl-peptidase_2-like,_transcript_variant_X2	Olive	PF00082:Subtilase_family	IPR005269:Cytokinin riboside 5'-monophosphate phosphoribohydrolase LOG
LOC111395194	XP_022876972.1	uncharacterized_hydrolase_YugF,_transcript_variant_X3	Olive	PF12146:Serine_aminopeptidase,_S33
LOC111383584	XP_022863470.1	ureidoglycolate_hydrolase,_transcript_variant_X2	Olive	PF01546:Peptidase_family_M20/M25/M40	IPR024709:Putative O-fucosyltransferase, plant
LOC111391141	XP_022872058.1	vacuolar-processing_enzyme-like	Olive	PF01650:Peptidase_C13_family	IPR036163:Heavy metal-associated domain superfamily//IPR006121:Heavy metal-associated domain, HMA
LOC111376116	XP_022854811.1	vacuolar-processing_enzyme-like	Olive	PF01650:Peptidase_C13_family
LOC111396623	XP_022878810.1	vacuole_membrane_protein_KMS1-like,_transcript_variant_X2	Olive		IPR021109:Aspartic peptidase domain superfamily//IPR033121:Peptidase family A1 domain//IPR034161:Pepsin-like domain, plant
LOC111401715	XP_022885340.1	vignain-like	Olive	PF00112:Papain_family_cysteine_protease//PF08246:Cathepsin_propeptide_inhibitor_domain_(I29)	IPR009018:Signal recognition particle, SRP9/SRP14 subunit
LOC111367123	XP_022843615.1	vignain-like	Olive	PF00112:Papain_family_cysteine_protease//PF08246:Cathepsin_propeptide_inhibitor_domain_(I29)
LOC111365547	XP_022841872.1	xaa-Pro_dipeptidase	Olive	PF00557:Metallopeptidase_family_M24	IPR002550:CNNM, transmembrane domain
LOC111406614	XP_022891771.1	zinc_finger_with_UFM1-specific_peptidase_domain_protein	Olive	PF07910:Peptidase_family_C78
LOC111407786	XP_022893234.1	zinc_protease_PQQL-like,_transcript_variant_X3	Olive	PF05193:Peptidase_M16_inactive_domain	IPR001356:Homeobox domain//IPR017970:Homeobox, conserved site//IPR009057:Homeobox-like domain superfamily//IPR003106:Leucine zipper, homeobox-associated
LOC111407783	XP_022893227.1	zinc_protease_PQQL-like,_transcript_variant_X8	Olive	PF04758:Ribosomal_protein_S30	IPR000504:RNA recognition motif domain//IPR035979:RNA-binding domain superfamily//IPR012677:Nucleotide-binding alpha-beta plait domain superfamily
LOC111382528	XP_022862302.1	zingipain-2	Olive	PF00112:Papain_family_cysteine_protease//PF08246:Cathepsin_propeptide_inhibitor_domain_(I29)	IPR001680:WD40 repeat//IPR019775:WD40 repeat, conserved site//IPR015943:WD40/YVTN repeat-like-containing domain superfamily//IPR017986:WD40-repeat-containing domain//IPR036322:WD40-repeat-containing domain superfamily//IPR020472:G-protein beta WD-40 repeat
LOC111382648	XP_022862440.1	zingipain-2	Olive	PF08246:Cathepsin_propeptide_inhibitor_domain_(I29)//PF00396:Granulin//PF00112:Papain_family_cysteine_protease	IPR002885:Pentatricopeptide repeat//IPR011990:Tetratricopeptide-like helical domain superfamily
LOC111382648	XP_022862440.1	zingipain-2	Olive	PF08246:Cathepsin_propeptide_inhibitor_domain_(I29)//PF00396:Granulin//PF00112:Papain_family_cysteine_protease	IPR016160:Aldehyde dehydrogenase, cysteine active site//IPR000668:Peptidase C1A, papain C-terminal//IPR025660:Cysteine peptidase, histidine active site//IPR000169:Cysteine peptidase, cysteine active site//IPR000118:Granulin//IPR038765:Papain-like cysteine peptidase superfamily//IPR037277:Granulin superfamily//IPR025661:Cysteine peptidase, asparagine active site//IPR039417:Papain-like cysteine end…
