# Supplementary material for: Characterization of Transcriptome Dynamics during Early Fruit Development in Olive (Olea europaea L.)
Source: Int J Mol Sci. 2023 Jan 4;24(2):961. doi: 10.3390/ijms24020961 (PMC9864153; doi:10.3390/ijms24020961)
Supplement: Supplementary file 1 [file ijms-24-00961-s001.zip › Table S17_CELL WALL.xlsx]

## Sheet: P14 vs. P0_UP
Supplementary Table S17. Cell-wall-related genes induced or repressed in the dividing fruits at 14 (P14) versus the flowers at anthesis stage (P0), and the expanding fruits at 28 (P28) DPA versus the dividing fruits at 14 (P14) during early olive fruit development.
P14 vs. P0_UP
Genes	log2FoldChange	FoldChange	pvalue	padj	Gene_ID	description	Organism
LOC111365447	1.16235	2.23821	1.23e-07	4.74e-07	XP_022841762.1	acid_beta-fructofuranosidase-like	Olive
LOC111391839	1.4823	2.79394	3.47e-15	2.34e-14	XP_022872881.1	acidic_endochitinase-like	Olive
LOC111405919	1.57996	2.98962	2.06e-13	1.25e-12	XP_022890795.1	alpha-galactosidase_1-like	Olive
LOC111373614	1.52811	2.88408	7.9e-09	3.42e-08	XP_022851936.1	alpha-galactosidase_3-like	Olive
LOC111406043	1.37441	2.59263	1.46e-06	5.05e-06	XP_022890990.1	alpha-galactosidase_3-like	Olive
LOC111397171	0.567965	1.48243	0.00858381	0.0170919	XP_022879712.1	alpha-galactosidase_3-like	Olive
LOC111387363	0.888219	1.85089	0.0032693	0.00701748	XP_022867688.1	alpha-glucosidase_2-like	Olive
LOC111387345	0.866781	1.82359	0.00202098	0.00450653	XP_022867666.1	alpha-glucosidase_2-like	Olive
LOC111387365	0.6593	1.57932	0.0204233	0.0375023	XP_022867690.1	alpha-glucosidase_2-like	Olive
LOC111387333	0.440578	1.35715	0.00470659	0.00984252	XP_022867656.1	alpha-glucosidase_2-like	Olive
LOC111382245	0.824043	1.77036	0.0126269	0.024291		alpha-glucosidase-like	Olive
LOC111408324	0.776674	1.71318	1.44e-06	4.97e-06	XP_022893862.1	alpha-glucosidase-like	Olive
LOC111380184	0.549686	1.46377	1.01e-05	3.14e-05	XP_022859443.1	alpha-glucosidase-like,_transcript_variant_X2	Olive
LOC111400788	1.13972	2.20339	4.48e-15	3e-14	XP_022883958.1	alpha-mannosidase_At3g26720-like,_transcript_variant_X2	Olive
LOC111366217	1.11987	2.17328	6.06e-09	2.65e-08	XP_022842692.1	alpha-mannosidase_At5g13980	Olive
LOC111396890	0.402212	1.32153	0.0233785	0.0422856	XP_022879256.1	alpha-mannosidase_At5g13980,_transcript_variant_X2	Olive
LOC111401982	2.27195	4.82975	6.11e-17	4.57e-16	XP_022885750.1	alpha-mannosidase_At5g66150	Olive
LOC111401983	1.97934	3.94314	1.54e-21	1.43e-20	XP_022885751.1	alpha-mannosidase_At5g66150	Olive
LOC111400581	3.12784	8.74125	1.2e-31	1.69e-30	XP_022883758.1	alpha-mannosidase-like	Olive
LOC111401981	2.173	4.50961	1.72e-29	2.24e-28	XP_022885749.1	alpha-mannosidase-like	Olive
LOC111401986	1.27518	2.42029	7.65e-09	3.32e-08	XP_022885759.1	alpha-mannosidase-like,_transcript_variant_X6	Olive
LOC111387812	3.08323	8.47509	4.84e-93	2.65e-91	XP_022868169.1	alpha-xylosidase_1-like	Olive
LOC111384777	2.41003	5.31487	5.23e-88	2.66e-86	XP_022864868.1	alpha-xylosidase_1-like	Olive
LOC111371209	1.11098	2.15993	0.00189258	0.00423934	XP_022848873.1	arabinogalactan_peptide_14-like	Olive
LOC111386381	0.646499	1.56536	0.0230009	0.0416803	XP_022866606.1	beta-1,3-galactosyltransferase_GALT1-like	Olive
LOC111406195	0.472281	1.3873	0.00162024	0.00366863	XP_022891235.1	beta-1,3-galactosyltransferase_GALT1-like,_transcript_variant_X2	Olive
LOC111381698	0.838722	1.78846	1.11e-05	3.42e-05	XP_022861278.1	beta-1,3-galactosyltransferase_GALT1-like,_transcript_variant_X3	Olive
LOC111387574	1.91166	3.76241	1.64e-14	1.06e-13	XP_022867912.1	beta-1,6-galactosyltransferase_GALT31A	Olive
LOC111377030	1.49652	2.82162	6.26e-17	4.67e-16	XP_022855828.1	beta-D-xylosidase_2,_transcript_variant_X5	Olive
LOC111409003	1.27572	2.42119	2.46e-12	1.39e-11	XP_022894659.1	beta-D-xylosidase_6,_transcript_variant_X2	Olive
LOC111391059	1.81006	3.50657	2.66e-12	1.5e-11	XP_022871971.1	beta-D-xylosidase_7	Olive
LOC111409129	1.13119	2.19039	8.67e-05	0.000238842	XP_022894854.1	beta-galactosidase_16,_transcript_variant_X2	Olive
LOC111410536	1.05566	2.07866	3.08e-12	1.73e-11	XP_022896700.1	beta-galactosidase_3-like	Olive
LOC111400572	0.949863	1.93169	1.18e-09	5.47e-09	XP_022883749.1	beta-galactosidase_3-like	Olive
LOC111367696	1.42826	2.69123	1.27e-28	1.6e-27	XP_022844468.1	beta-galactosidase-like	Olive
LOC111387485	1.10575	2.15211	8.46e-08	3.31e-07	XP_022867807.1	beta-galactosidase-like	Olive
LOC111375992	0.533392	1.44733	3.3e-06	1.09e-05	XP_022854687.1	beta-glucosidase_11-like	Olive
LOC111395689	1.58466	2.99936	1.51e-18	1.22e-17	XP_022877573.1	beta-glucosidase_18-like,_transcript_variant_X4	Olive
LOC111386633	1.64998	3.13828	2.7e-16	1.94e-15	XP_022866868.1	beta-glucosidase_46-like	Olive
LOC111395997	1.86279	3.6371	5.73e-38	9.77e-37	XP_022878014.1	beta-glucosidase_46-like,_transcript_variant_X2	Olive
LOC111383051	1.36215	2.57068	6.25e-19	5.15e-18	XP_022862878.1	beta-glucosidase_BoGH3B-like	Olive
LOC111388762	1.98996	3.97227	1.81e-51	4.48e-50	XP_022869326.1	beta-glucosidase_BoGH3B-like,_transcript_variant_X2	Olive
LOC111382271	1.39404	2.62814	2.18e-23	2.22e-22	XP_022861956.1	beta-glucosidase_BoGH3B-like,_transcript_variant_X2	Olive
LOC111398515	0.581692	1.4966	0.000178561	0.000469632	XP_022881221.1	beta-glucosidase_BoGH3B-like,_transcript_variant_X2	Olive
LOC111403824	4.92452	30.3688	4.11e-27	4.86e-26	XP_022888218.1	beta-glucosidase-like	Olive
LOC111374590	3.11961	8.69151	2.4e-18	1.92e-17	XP_022853054.1	beta-glucosidase-like	Olive
LOC111381384	2.23056	4.69315	2.41e-38	4.17e-37	XP_022860931.1	beta-glucosidase-like	Olive
LOC111392239	2.17158	4.50517	3.58e-55	9.78e-54	XP_022873293.1	beta-glucosidase-like	Olive
LOC111404347	2.15182	4.44387	5.44e-11	2.8e-10	XP_022888932.1	beta-glucosidase-like	Olive
LOC111392048	2.87251	7.32339	2.08e-23	2.12e-22	XP_022873099.1	beta-glucosidase-like,_transcript_variant_X2	Olive
LOC111378046	2.08336	4.23793	1.15e-33	1.73e-32	XP_022856975.1	beta-glucosidase-like,_transcript_variant_X2	Olive
LOC111371565	1.06631	2.09407	1.75e-12	1e-11	XP_022849387.1	beta-glucosidase-like_SFR2,_chloroplastic,_transcript_variant_X2	Olive
LOC111375496	0.929586	1.90473	5.3e-13	3.12e-12	XP_022854104.1	beta-xylosidase/alpha-L-arabinofuranosidase_2-like,_transcript_variant_X2	Olive
LOC111402300	2.16626	4.48857	6.83e-14	4.25e-13	XP_022886253.1	callose_synthase_11-like	Olive
LOC111382529	1.28614	2.43874	1.89e-05	5.67e-05		callose_synthase_11-like	Olive
LOC111370577	1.03291	2.04615	4.77e-08	1.92e-07		callose_synthase_11-like	Olive
LOC111370415	0.437066	1.35385	0.0233643	0.0422637	XP_022847873.1	callose_synthase_12-like	Olive
LOC111369905	1.83993	3.57992	2.78e-39	4.96e-38	XP_022847385.1	callose_synthase_3-like,_transcript_variant_X2	Olive
LOC111368853	0.45032	1.36634	0.0243445	0.0438692	XP_022846099.1	cell_wall_integrity_protein_scw1,_transcript_variant_X2	Olive
LOC111404452	1.10117	2.14528	1.62e-10	8.03e-10	XP_022889026.1	cell_wall_protein_RBR3-like	Olive
LOC111373395	0.639621	1.55792	2.45e-06	8.22e-06	XP_022851690.1	cellulose_synthase_A_catalytic_subunit_1_[UDP-forming]	Olive
LOC111385363	0.860452	1.81561	1.35e-12	7.78e-12	XP_022865514.1	cellulose_synthase_A_catalytic_subunit_1_[UDP-forming]-like	Olive
LOC111377257	1.0534	2.07541	2.47e-11	1.3e-10	XP_022856087.1	cellulose_synthase_A_catalytic_subunit_2_[UDP-forming]-like	Olive
LOC111408762	1.00439	2.0061	5.2e-19	4.3e-18	XP_022894296.1	cellulose_synthase_A_catalytic_subunit_2_[UDP-forming]-like	Olive
LOC111393785	2.14248	4.41521	4.41e-76	1.83e-74	XP_022875256.1	cellulose_synthase_A_catalytic_subunit_2_[UDP-forming]-like,_transcript_variant_X2	Olive
LOC111390423	0.743793	1.67457	0.0281473	0.0499116	XP_022871230.1	cellulose_synthase_A_catalytic_subunit_2_[UDP-forming]-like,_transcript_variant_X2	Olive
LOC111410495	1.04141	2.05824	3.7e-16	2.64e-15	XP_022896619.1	cellulose_synthase_A_catalytic_subunit_3_[UDP-forming]-like	Olive
LOC111407758	3.08326	8.47525	3.11e-35	4.89e-34	XP_022893186.1	cellulose_synthase_A_catalytic_subunit_4_[UDP-forming]-like	Olive
LOC111393442	2.58455	5.99827	1.16e-44	2.44e-43	XP_022874743.1	cellulose_synthase_A_catalytic_subunit_4_[UDP-forming]-like	Olive
LOC111397386	1.5858	3.00174	8.43e-22	7.97e-21	XP_022880055.1	cellulose_synthase_A_catalytic_subunit_6_[UDP-forming]-like	Olive
LOC111403788	1.77716	3.42751	4.97e-31	6.8e-30	XP_022888179.1	cellulose_synthase_A_catalytic_subunit_7_[UDP-forming],_transcript_variant_X2	Olive
LOC111412157	1.73498	3.32875	3.77e-12	2.1e-11	XP_022898714.1	cellulose_synthase_A_catalytic_subunit_8_[UDP-forming]	Olive
LOC111382923	2.04336	4.12203	9.93e-29	1.26e-27	XP_022862730.1	cellulose_synthase-like_protein_D2,_transcript_variant_X8	Olive
LOC111405683	0.749594	1.68132	1.07e-05	3.32e-05	XP_022890451.1	cellulose_synthase-like_protein_D3	Olive
LOC111407419	0.581999	1.49692	3.05e-05	8.9e-05	XP_022892644.1	cellulose_synthase-like_protein_D3,_transcript_variant_X4	Olive
LOC111394168	2.66367	6.33642	9.85e-73	3.8e-71	XP_022875706.1	cellulose_synthase-like_protein_D5	Olive
LOC111376857	0.942063	1.92127	2.62e-10	1.28e-09	XP_022855631.1	cellulose_synthase-like_protein_E6	Olive
LOC111378473	2.85377	7.22887	1.62e-51	4.02e-50	XP_022857450.1	cellulose_synthase-like_protein_G2	Olive
LOC111384168	2.64855	6.27037	1e-43	2.05e-42	XP_022864188.1	cellulose_synthase-like_protein_G2	Olive
LOC111386708	0.69752	1.62171	6.23e-05	0.000175086	XP_022866941.1	cellulose_synthase-like_protein_G2	Olive
LOC111393343	2.43916	5.42325	2.46e-19	2.07e-18	XP_022874611.1	cellulose_synthase-like_protein_G2,_transcript_variant_X3	Olive
LOC111371734	1.55782	2.94408	1.08e-07	4.17e-07	XP_022849638.1	cellulose_synthase-like_protein_G3	Olive
LOC111390470	0.922496	1.89539	2.34e-12	1.32e-11	XP_022871286.1	cellulose_synthase-like_protein_G3,_transcript_variant_X2	Olive
LOC111369745	0.822265	1.76818	1.79e-05	5.4e-05	XP_022847147.1	xyloglucan_glycosyltransferase_6	Olive
LOC111387205	1.81255	3.51264	1.07e-14	7.04e-14	XP_022867517.1	xyloglucan_glycosyltransferase_8	Olive
LOC111392080	2.39674	5.26612	5.01e-55	1.37e-53	XP_022873127.1	chitinase-like_protein_1,_transcript_variant_X5	Olive
LOC111400351	0.587021	1.50214	0.0264568	0.0471926	XP_022883534.1	classical_arabinogalactan_protein_10-like	Olive
LOC111412409	4.39641	21.0596	6.61e-19	5.44e-18	XP_022899100.1	classical_arabinogalactan_protein_26-like	Olive
LOC111368158	1.04334	2.061	1.41e-14	9.19e-14	XP_022845161.1	classical_arabinogalactan_protein_4-like	Olive
LOC111394514	1.93597	3.82634	3.33e-42	6.51e-41	XP_022876141.1	classical_arabinogalactan_protein_5-like	Olive
LOC111375830	1.26821	2.40862	9.01e-08	3.52e-07	XP_022854510.1	classical_arabinogalactan_protein_9-like	Olive
LOC111377703	1.26766	2.40771	2.55e-14	1.64e-13	XP_022856601.1	classical_arabinogalactan_protein_9-like,_transcript_variant_X2	Olive
LOC111401132	0.494301	1.40864	0.000795548	0.001899	XP_022884483.1	endo-1,4-beta-xylanase_C,_transcript_variant_X2	Olive
LOC111393511	0.887855	1.85042	0.00922845	0.0182695	XP_022874843.1	endochitinase_EP3-like	Olive
LOC111374207	2.87877	7.35522	5.25e-29	6.71e-28	XP_022852619.1	endoglucanase_11-like	Olive
LOC111394214	7.47121	177.442	6.41e-08	2.54e-07	XP_022875747.1	endoglucanase_17,_transcript_variant_X2	Olive
LOC111406899	7.48546	179.204	6.91e-08	2.73e-07	XP_022892029.1	endoglucanase_17-like	Olive
LOC111379392	6.53587	92.7884	6.02e-22	5.74e-21	XP_022858517.1	endoglucanase_17-like	Olive
LOC111375818	4.55764	23.5498	1.82e-09	8.32e-09		endoglucanase_17-like	Olive
LOC111387565	2.24111	4.72759	2.26e-19	1.9e-18	XP_022867905.1	endoglucanase_1-like	Olive
LOC111410091	2.21485	4.64234	1.58e-07	6.01e-07	XP_022896046.1	endoglucanase_24-like	Olive
LOC111384782	0.839904	1.78993	0.00972573	0.0191614	XP_022864873.1	endoglucanase_2-like	Olive
LOC111375465	1.25217	2.382	4.26e-17	3.22e-16	XP_022854059.1	endoglucanase_6-like	Olive
LOC111386003	2.82073	7.06519	5.03e-28	6.21e-27	XP_022866199.1	endoglucanase_8-like	Olive
LOC111384264	2.64631	6.26065	2.66e-14	1.71e-13	XP_022864295.1	endoglucanase_8-like,_transcript_variant_X3	Olive
LOC111398562	1.97204	3.92323	1.03e-05	3.2e-05	XP_022881291.1	endoglucanase-like	Olive
LOC111370628	0.530867	1.4448	0.000329792	0.000833802	XP_022848211.1	endonuclease_4-like,_transcript_variant_X3	Olive
LOC111392757	0.591642	1.50696	0.00646982	0.0131951	XP_022873921.1	exo-poly-alpha-D-galacturonosidase	Olive
LOC111386313	2.69565	6.47846	1.22e-50	2.97e-49		expansin-A1	Olive
LOC111397180	1.15546	2.22756	1.08e-09	5.03e-09	XP_022879718.1	expansin-A13	Olive
LOC111381719	2.44409	5.44181	1.22e-63	3.98e-62	XP_022861297.1	expansin-A15-like	Olive
LOC111398900	2.22907	4.68831	5.28e-76	2.18e-74	XP_022881827.1	expansin-A1-like	Olive
LOC111393522	3.31726	9.9677	1.87e-77	7.96e-76	XP_022874855.1	expansin-A4-like	Olive
LOC111377547	2.58763	6.0111	9.37e-20	8.06e-19	XP_022856446.1	expansin-A4-like	Olive
LOC111390026	2.31051	4.9606	1.02e-25	1.14e-24	XP_022870782.1	expansin-A6-like	Olive
LOC111375950	1.46206	2.75502	1.13e-31	1.59e-30	XP_022854643.1	expansin-A6-like	Olive
LOC111388915	1.33784	2.52773	0.000191942	0.000502703	XP_022869508.1	expansin-A6-like,_transcript_variant_X3	Olive
LOC111388612	3.88464	14.7704	1.21e-71	4.56e-70	XP_022869136.1	expansin-B3-like	Olive
LOC111412040	1.7585	3.38346	2.99e-25	3.27e-24	XP_022898545.1	expansin-B3-like	Olive
LOC111374382	3.0885	8.50612	4.64e-32	6.64e-31	XP_022852815.1	extensin-2-like,_transcript_variant_X2	Olive
LOC111393866	3.14541	8.84837	0.000969682	0.00228051	XP_022875386.1	extensin-2-like,_transcript_variant_X3	Olive
LOC111393113	3.24293	9.46714	2.82e-12	1.59e-11	XP_022874278.1	extensin-3-like	Olive
LOC111383606	3.19752	9.17377	3.05e-52	7.75e-51	XP_022863489.1	extensin-3-like	Olive
LOC111380600	2.3798	5.20463	3.36e-21	3.08e-20	XP_022859978.1	extensin-like	Olive
LOC111385698	0.694694	1.61854	0.0114289	0.0221946	XP_022865890.1	extensin-like	Olive
LOC111387895	0.335905	1.26217	0.00738032	0.0148814	XP_022868270.1	extensin-like	Olive
LOC111376863	1.04966	2.07004	2.67e-18	2.13e-17	XP_022855636.1	fasciclin-like_arabinogalactan_protein_1	Olive
LOC111403161	3.15083	8.88166	6.95e-08	2.75e-07	XP_022887330.1	fasciclin-like_arabinogalactan_protein_11	Olive
LOC111372810	2.54218	5.82469	7.95e-17	5.89e-16	XP_022850983.1	fasciclin-like_arabinogalactan_protein_11	Olive
LOC111380681	2.18981	4.56246	1.56e-10	7.76e-10	XP_022860078.1	fasciclin-like_arabinogalactan_protein_11	Olive
LOC111369396	1.98046	3.9462	3.72e-07	1.37e-06	XP_022846666.1	fasciclin-like_arabinogalactan_protein_11	Olive
LOC111369928	3.1874	9.10967	2.91e-27	3.47e-26	XP_022847429.1	fasciclin-like_arabinogalactan_protein_12	Olive
LOC111375170	2.30139	4.92934	2.05e-17	1.57e-16	XP_022853739.1	fasciclin-like_arabinogalactan_protein_15,_transcript_variant_X5	Olive
LOC111378787	0.872417	1.83073	3.12e-05	9.09e-05	XP_022857804.1	fasciclin-like_arabinogalactan_protein_16	Olive
LOC111383913	1.10212	2.1467	8.31e-15	5.5e-14	XP_022863878.1	fasciclin-like_arabinogalactan_protein_17	Olive
LOC111378414	1.46502	2.76067	9.03e-12	4.91e-11	XP_022857376.1	fasciclin-like_arabinogalactan_protein_4	Olive
LOC111412049	1.73501	3.32881	6.57e-56	1.83e-54	XP_022898554.1	fasciclin-like_arabinogalactan_protein_7,_transcript_variant_X2	Olive
LOC111391531	1.3014	2.46467	4.17e-16	2.97e-15	XP_022872533.1	fasciclin-like_arabinogalactan_protein_7,_transcript_variant_X3	Olive
LOC111410815	1.97231	3.92395	9.28e-55	2.52e-53	XP_022897140.1	fasciclin-like_arabinogalactan_protein_8	Olive
LOC111397552	1.45711	2.74558	2.87e-14	1.84e-13	XP_022880312.1	galactan_beta-1,4-galactosyltransferase_GALS1	Olive
LOC111378616	1.18338	2.27108	5.76e-14	3.61e-13	XP_022857614.1	galactinol--sucrose_galactosyltransferase_1	Olive
LOC111392290	0.687464	1.61045	0.0131411	0.0251808	XP_022873370.1	galactinol--sucrose_galactosyltransferase_1,_transcript_variant_X2	Olive
LOC111385012	3.72483	13.2217	6.65e-72	2.53e-70	XP_022865133.1	galactinol--sucrose_galactosyltransferase_2	Olive
LOC111396901	1.12079	2.17466	1.67e-07	6.36e-07	XP_022879271.1	galactinol--sucrose_galactosyltransferase_2,_transcript_variant_X3	Olive
LOC111390696	1.39877	2.63677	1.15e-08	4.89e-08	XP_022871544.1	galactinol--sucrose_galactosyltransferase_6,_transcript_variant_X4	Olive
LOC111375788	0.732934	1.66202	0.0122953	0.0237223	XP_022854450.1	galacturonosyltransferase_10,_transcript_variant_X2	Olive
LOC111367924	1.85244	3.61111	3.62e-24	3.8e-23	XP_022844805.1	galacturonosyltransferase-like_1	Olive
LOC111379359	2.74926	6.72373	3.48e-42	6.8e-41	XP_022858485.1	galacturonosyltransferase-like_3	Olive
LOC111403553	1.13445	2.19534	5.34e-11	2.75e-10	XP_022887872.1	galacturonosyltransferase-like_7	Olive
LOC111401169	0.923942	1.89729	0.000677671	0.00163234	XP_022884550.1	glucan_1,3-beta-glucosidase_A,_transcript_variant_X3	Olive
LOC111402806	3.65478	12.595	7.02e-12	3.85e-11	XP_022886904.1	glucan_endo-1,3-beta-D-glucosidase,_transcript_variant_X3	Olive
LOC111380816	5.3854	41.7992	4.86e-35	7.6e-34	XP_022860239.1	glucan_endo-1,3-beta-D-glucosidase-like	Olive
LOC111410191	0.686032	1.60885	9.09e-07	3.2e-06	XP_022896193.1	glucan_endo-1,3-beta-D-glucosidase-like	Olive
LOC111378392	1.14891	2.21746	2.39e-21	2.21e-20	XP_022857353.1	glucan_endo-1,3-beta-glucosidase,_acidic-like	Olive
LOC111386074	0.368335	1.29086	0.00431264	0.00907795	XP_022866268.1	glucan_endo-1,3-beta-glucosidase,_acidic-like	Olive
LOC111395976	1.91287	3.76558	1.59e-40	2.94e-39	XP_022877983.1	glucan_endo-1,3-beta-glucosidase_1	Olive
LOC111387578	3.69155	12.9202	6.16e-147	7.14e-145	XP_022867920.1	glucan_endo-1,3-beta-glucosidase_11-like,_transcript_variant_X3	Olive
LOC111402898	1.40762	2.653	7.16e-08	2.83e-07	XP_022886987.1	glucan_endo-1,3-beta-glucosidase_11-like,_transcript_variant_X3	Olive
LOC111376496	2.57276	5.94946	1.69e-24	1.8e-23	XP_022855226.1	glucan_endo-1,3-beta-glucosidase_12-like	Olive
LOC111372286	1.86993	3.65516	2.81e-68	9.99e-67	XP_022850312.1	glucan_endo-1,3-beta-glucosidase_12-like	Olive
LOC111369671	0.909546	1.87845	8.93e-08	3.49e-07	XP_022847046.1	glucan_endo-1,3-beta-glucosidase_13-like	Olive
LOC111402073	0.353689	1.27782	0.00628188	0.0128449	XP_022885888.1	glucan_endo-1,3-beta-glucosidase_13-like	Olive
LOC111368800	1.76676	3.40289	4.3e-47	9.7e-46	XP_022846026.1	glucan_endo-1,3-beta-glucosidase_14-like	Olive
LOC111386598	1.01022	2.01421	0.00164729	0.00372437	XP_022866836.1	glucan_endo-1,3-beta-glucosidase_14-like	Olive
LOC111389590	3.16342	8.95953	2.18e-61	6.91e-60	XP_022870285.1	glucan_endo-1,3-beta-glucosidase_1-like,_transcript_variant_X2	Olive
LOC111401210	1.01129	2.01571	9.57e-10	4.48e-09	XP_022884608.1	glucan_endo-1,3-beta-glucosidase_2-like	Olive
LOC111402134	4.23134	18.7828	1.18e-180	2.16e-178	XP_022885990.1	glucan_endo-1,3-beta-glucosidase_3-like	Olive
LOC111399063	3.3224	10.0033	9.15e-19	7.48e-18	XP_022882052.1	glucan_endo-1,3-beta-glucosidase_3-like	Olive
LOC111377448	2.69166	6.46054	1.18e-11	6.36e-11	XP_022856311.1	glucan_endo-1,3-beta-glucosidase_3-like	Olive
LOC111411772	3.43286	10.7992	1.18e-21	1.1e-20	XP_022898140.1	glucan_endo-1,3-beta-glucosidase_3-like,_transcript_variant_X2	Olive
LOC111374604	0.930397	1.9058	0.000409953	0.00102104	XP_022853068.1	glucan_endo-1,3-beta-glucosidase_3-like,_transcript_variant_X2	Olive
LOC111407353	2.43803	5.41902	2.04e-14	1.32e-13		glucan_endo-1,3-beta-glucosidase_4-like	Olive
LOC111380127	0.707624	1.63311	4.31e-06	1.4e-05	XP_022859370.1	glucan_endo-1,3-beta-glucosidase_4-like,_transcript_variant_X3	Olive
LOC111367480	2.16735	4.49199	1.56e-41	2.97e-40	XP_022844153.1	glucan_endo-1,3-beta-glucosidase_4-like,_transcript_variant_X5	Olive
LOC111371007	1.47899	2.78753	3.93e-17	2.97e-16		glucan_endo-1,3-beta-glucosidase_6-like	Olive
LOC111399482	1.28286	2.43321	0.000192078	0.00050298	XP_022882595.1	glucan_endo-1,3-beta-glucosidase_8-like	Olive
LOC111369732	1.99827	3.9952	6.52e-09	2.85e-08	XP_022847133.1	glucan_endo-1,3-beta-glucosidase_9	Olive
LOC111382545	0.538551	1.45251	0.000169914	0.000448223	XP_022862332.1	glucan_endo-1,3-beta-glucosidase_A6	Olive
LOC111405931	3.69359	12.9384	1.74e-93	9.62e-92	XP_022890815.1	glucan_endo-1,3-beta-glucosidase-like	Olive
LOC111406014	0.647766	1.56674	5.33e-07	1.93e-06	XP_022890945.1	glucan_endo-1,3-beta-glucosidase-like	Olive
LOC111374368	2.13796	4.4014	2.68e-22	2.6e-21	XP_022852798.1	glucuronoxylan_4-O-methyltransferase_1-like	Olive
LOC111372502	1.2236	2.33528	8.43e-06	2.65e-05	XP_022850619.1	glucuronoxylan_glucuronosyltransferase_IRX7	Olive
LOC111398035	1.26058	2.39593	1.46e-10	7.29e-10	XP_022880763.1	glycine-rich_cell_wall_structural_protein-like	Olive
LOC111401020	1.64314	3.12345	6.06e-36	9.76e-35	XP_022884317.1	glycosyltransferase_7	Olive
LOC111397611	3.26929	9.64171	2.77e-21	2.55e-20	XP_022880385.1	laccase-12-like	Olive
LOC111397597	2.8752	7.33705	1.83e-14	1.19e-13	XP_022880370.1	laccase-12-like	Olive
LOC111405057	2.63155	6.19689	1.21e-06	4.2e-06	XP_022889513.1	laccase-12-like	Olive
LOC111371253	1.23726	2.35751	1.89e-05	5.67e-05	XP_022848908.1	laccase-12-like	Olive
LOC111380004	2.69404	6.47121	4.16e-17	3.14e-16	XP_022859235.1	laccase-12-like,_transcript_variant_X2	Olive
LOC111408780	6.33547	80.7542	1.04e-05	3.22e-05	XP_022894320.1	laccase-14-like	Olive
LOC111408786	1.72696	3.31029	0.000331139	0.000836957	XP_022894322.1	laccase-14-like	Olive
LOC111397819	2.87738	7.34812	1.42e-07	5.44e-07	XP_022880563.1	laccase-15-like	Olive
LOC111408785	0.94514	1.92538	2.89e-13	1.74e-12	XP_022894321.1	laccase-15-like	Olive
LOC111374465	2.64554	6.2573	2.28e-09	1.04e-08	XP_022852901.1	laccase-17-like	Olive
LOC111399734	2.7866	6.9	2.14e-10	1.05e-09	XP_022882972.1	laccase-17-like,_transcript_variant_X2	Olive
LOC111405985	2.2377	4.71645	1.64e-09	7.54e-09	XP_022890904.1	laccase-22-like	Olive
LOC111407973	2.91193	7.52622	3.82e-58	1.13e-56	XP_022893474.1	laccase-4-like	Olive
LOC111399330	1.56421	2.95716	2.84e-07	1.06e-06	XP_022882354.1	laccase-4-like	Olive
LOC111404394	0.879401	1.83961	0.000138294	0.000369324	XP_022888975.1	laccase-4-like	Olive
LOC111404076	2.83063	7.11383	0.00862871	0.0171742	XP_022888574.1	laccase-7-like	Olive
LOC111400943	2.82042	7.06366	1.22e-16	8.99e-16	XP_022884188.1	leucine-rich_repeat_extensin-like_protein_3	Olive
LOC111408529	1.63762	3.11153	1.55e-09	7.14e-09	XP_022894044.1	leucine-rich_repeat_extensin-like_protein_4	Olive
LOC111399432	1.63434	3.10446	3.24e-14	2.06e-13	XP_022882509.1	leucine-rich_repeat_extensin-like_protein_4	Olive
LOC111403742	2.59068	6.02384	2.37e-29	3.07e-28	XP_022888121.1	leucine-rich_repeat_extensin-like_protein_6	Olive
LOC111376077	0.686495	1.60937	1.43e-09	6.58e-09	XP_022854773.1	lysine-rich_arabinogalactan_protein_18-like	Olive
LOC111367225	1.55944	2.9474	2.87e-35	4.52e-34	XP_022843749.1	lysine-rich_arabinogalactan_protein_18-like,_transcript_variant_X2	Olive
LOC111396250	0.800992	1.7423	8.02e-07	2.85e-06	XP_022878391.1	lysine-rich_arabinogalactan_protein_19	Olive
LOC111395496	0.689983	1.61326	4.92e-06	1.59e-05	XP_022877282.1	mannan_endo-1,4-beta-mannosidase_2-like	Olive
LOC111404337	0.765459	1.69991	1.43e-08	6.04e-08	XP_022888924.1	mannan_endo-1,4-beta-mannosidase_6-like	Olive
LOC111392942	0.840623	1.79082	0.00389951	0.00827148	XP_022874124.1	mannan_endo-1,4-beta-mannosidase_6-like,_transcript_variant_X3	Olive
LOC111411182	1.62121	3.07633	6.77e-29	8.63e-28	XP_022897507.1	mannosylglycoprotein_endo-beta-mannosidase-like	Olive
LOC111392890	4.79646	27.7894	9.72e-164	1.43e-161	XP_022874067.1	non-classical_arabinogalactan_protein_31-like	Olive
LOC111379546	2.65942	6.31781	2.55e-29	3.3e-28		pectate_lyase_1	Olive
LOC111372210	4.00629	16.0699	1.03e-09	4.81e-09	XP_022850203.1	pectate_lyase_12	Olive
LOC111366163	2.8171	7.04743	3.84e-13	2.29e-12	XP_022842626.1	pectate_lyase_13	Olive
LOC111405437	4.22126	18.6521	1.88e-99	1.12e-97	XP_022890084.1	pectate_lyase_13,_transcript_variant_X2	Olive
LOC111405311	2.54589	5.83969	5.36e-77	2.25e-75	XP_022889906.1	pectate_lyase_18	Olive
LOC111367050	2.13261	4.3851	3.41e-32	4.89e-31	XP_022843508.1	pectate_lyase_18,_transcript_variant_X2	Olive
LOC111380601	1.47468	2.77922	1.66e-21	1.55e-20	XP_022859982.1	pectate_lyase_5	Olive
LOC111365266	0.849312	1.80164	0.000369599	0.000926989	XP_022841476.1	pectate_lyase_5	Olive
LOC111380011	0.953382	1.93641	4.49e-11	2.32e-10	XP_022859240.1	pectate_lyase_8	Olive
LOC111388172	2.56488	5.91704	3.99e-05	0.000114824	XP_022868623.1	pectin_acetylesterase_12-like,_transcript_variant_X2	Olive
LOC111385106	0.451647	1.3676	0.00230261	0.00508664	XP_022865240.1	pectin_acetylesterase_5-like	Olive
LOC111386535	0.675892	1.59758	0.00367476	0.00782881	XP_022866762.1	pectinesterase/pectinesterase_inhibitor_22	Olive
LOC111384532	0.934471	1.91119	5.13e-16	3.63e-15	XP_022864586.1	pectinesterase/pectinesterase_inhibitor_61	Olive
LOC111403817	0.532757	1.44669	0.0147864	0.027997	XP_022888209.1	pectinesterase/pectinesterase_inhibitor_PPE8B-like	Olive
LOC111366947	0.530341	1.44427	0.00547287	0.0113176	XP_022843395.1	pectinesterase_1-like	Olive
LOC111402506	2.03866	4.10865	3.56e-48	8.25e-47	XP_022886639.1	pectinesterase_2.1-like	Olive
LOC111399422	3.3902	10.4846	1.53e-13	9.35e-13	XP_022882497.1	pectinesterase_53	Olive
LOC111385928	6.27456	77.416	6.78e-68	2.38e-66	XP_022866118.1	pectinesterase_68	Olive
LOC111411895	3.49911	11.3067	5.17e-57	1.48e-55	XP_022898323.1	pectinesterase_inhibitor_3-like	Olive
LOC111405004	1.21957	2.32877	0.000664574	0.00160286	XP_022889489.1	pectinesterase_inhibitor_3-like	Olive
LOC111381167	3.22272	9.33545	1.35e-48	3.16e-47	XP_022860678.1	pectinesterase_inhibitor_7-like	Olive
LOC111377531	2.39078	5.24441	9.1e-95	5.07e-93	XP_022856426.1	pectinesterase_inhibitor_9-like	Olive
LOC111373916	4.11067	17.2757	1.29e-30	1.74e-29	XP_022852280.1	pectinesterase-like	Olive
LOC111403367	2.58215	5.98833	1.32e-134	1.29e-132	XP_022887658.1	pectinesterase-like	Olive
LOC111405079	2.35944	5.13171	4.14e-72	1.59e-70	XP_022889551.1	pectinesterase-like	Olive
LOC111412383	1.75723	3.38048	2.31e-07	8.68e-07	XP_022899057.1	pectinesterase-like	Olive
LOC111403739	1.30367	2.46856	1.1e-19	9.42e-19	XP_022888116.1	pectinesterase-like	Olive
LOC111373912	1.21446	2.32053	3.05e-19	2.55e-18	XP_022852276.1	pectinesterase-like,_transcript_variant_X2	Olive
LOC111402356	3.40146	10.5668	2.36e-18	1.89e-17	XP_022886357.1	PLASMODESMATA_CALLOSE-BINDING_PROTEIN_2-like	Olive
LOC111367089	2.75621	6.75618	4.43e-28	5.49e-27	XP_022843567.1	PLASMODESMATA_CALLOSE-BINDING_PROTEIN_2-like	Olive
LOC111376634	1.74747	3.35768	5.48e-14	3.43e-13	XP_022855372.1	PLASMODESMATA_CALLOSE-BINDING_PROTEIN_2-like,_transcript_variant_X2	Olive
LOC111390740	2.39985	5.27747	2.58e-71	9.66e-70	XP_022871606.1	PLASMODESMATA_CALLOSE-BINDING_PROTEIN_3-like	Olive
LOC111367090	2.36572	5.15409	2.74e-19	2.3e-18	XP_022843568.1	PLASMODESMATA_CALLOSE-BINDING_PROTEIN_3-like	Olive
LOC111402355	3.01532	8.08539	7.79e-31	1.06e-29	XP_022886355.1	PLASMODESMATA_CALLOSE-BINDING_PROTEIN_4-like	Olive
LOC111384870	2.09189	4.26306	3.31e-32	4.76e-31	XP_022864981.1	PLASMODESMATA_CALLOSE-BINDING_PROTEIN_4-like	Olive
LOC111372095	1.20893	2.31165	3.97e-05	0.000114337	XP_022850033.1	PLASMODESMATA_CALLOSE-BINDING_PROTEIN_5-like	Olive
LOC111411713	2.65399	6.29405	1.07e-50	2.62e-49	XP_022898049.1	polygalacturonase	Olive
LOC111404295	2.31474	4.97516	9.67e-13	5.61e-12	XP_022888892.1	polygalacturonase	Olive
LOC111374309	1.03215	2.04507	5.06e-21	4.6e-20	XP_022852732.1	polygalacturonase	Olive
LOC111411423	0.851069	1.80384	4.21e-07	1.54e-06	XP_022897728.1	polygalacturonase	Olive
LOC111376001	0.605052	1.52103	0.00290904	0.00630698	XP_022854698.1	polygalacturonase	Olive
LOC111376000	0.335116	1.26148	0.028019	0.0497128	XP_022854697.1	polygalacturonase	Olive
LOC111402879	0.841954	1.79248	5.68e-11	2.92e-10	XP_022886963.1	polygalacturonase,_transcript_variant_X4	Olive
LOC111409020	3.15379	8.8999	3.82e-19	3.18e-18	XP_022894712.1	polygalacturonase_1_beta-like_protein_3	Olive
LOC111382864	2.09303	4.26642	3.94e-28	4.89e-27	XP_022862668.1	polygalacturonase_At1g48100	Olive
LOC111396173	4.05157	16.5822	1.57e-77	6.69e-76	XP_022878277.1	polygalacturonase_At1g48100-like	Olive
LOC111382430	3.7061	13.0511	1.52e-28	1.91e-27	XP_022862172.1	polygalacturonase_At1g48100-like	Olive
LOC111365504	3.0774	8.44094	6.05e-27	7.1e-26	XP_022841827.1	polygalacturonase_At1g48100-like	Olive
LOC111401451	1.49992	2.82826	2.65e-22	2.57e-21	XP_022884955.1	polygalacturonase_At1g80170,_transcript_variant_X2	Olive
LOC111373356	5.09482	34.1738	1.68e-33	2.51e-32	XP_022851645.1	polygalacturonase-1_non-catalytic_subunit_beta-like	Olive
LOC111396179	3.50245	11.333	1.05e-118	8.23e-117	XP_022878287.1	polygalacturonase-1_non-catalytic_subunit_beta-like	Olive
LOC111377599	2.89207	7.42333	2.29e-05	6.81e-05	XP_022856498.1	polygalacturonase-like	Olive
LOC111387244	1.58784	3.00598	7.04e-09	3.06e-08	XP_022867555.1	polygalacturonase-like	Olive
LOC111394814	1.44863	2.72949	2.26e-38	3.92e-37	XP_022876595.1	protein_CELLULOSE_SYNTHASE_INTERACTIVE_1,_transcript_variant_X3	Olive
LOC111366806	0.863438	1.81937	5.32e-10	2.54e-09	XP_022843270.1	protein_CELLULOSE_SYNTHASE_INTERACTIVE_1-like	Olive
LOC111391372	1.35459	2.55724	7.49e-12	4.09e-11	XP_022872350.1	protein_CELLULOSE_SYNTHASE_INTERACTIVE_1-like,_transcript_variant_X4	Olive
LOC111385589	0.818036	1.763	2.7e-05	7.94e-05	XP_022865765.1	protein_CELLULOSE_SYNTHASE_INTERACTIVE_3-like	Olive
LOC111391555	1.04722	2.06655	2.33e-08	9.66e-08	XP_022872563.1	protein_CELLULOSE_SYNTHASE_INTERACTIVE_3-like,_transcript_variant_X2	Olive
LOC111388115	0.483958	1.39858	1.85e-05	5.56e-05		protein_EDS1B-like	Olive
LOC111394603	0.973319	1.96335	6.25e-08	2.48e-07	XP_022876271.1	protein_MIZU-KUSSEI_1-like	Olive
LOC111376809	1.08826	2.12618	1.14e-09	5.3e-09	XP_022855578.1	protein_REDUCED_WALL_ACETYLATION_2-like	Olive
LOC111381903	0.989422	1.98539	0.000114957	0.000310633	XP_022861529.1	protein_STICHEL-like,_transcript_variant_X2	Olive
LOC111403822	3.13731	8.7988	1.99e-27	2.39e-26	XP_022888215.1	raucaffricine-O-beta-D-glucosidase-like	Olive
LOC111403823	2.96466	7.80642	7.16e-29	9.13e-28	XP_022888217.1	raucaffricine-O-beta-D-glucosidase-like	Olive
LOC111403826	0.955855	1.93973	6.94e-05	0.000193555	XP_022888219.1	raucaffricine-O-beta-D-glucosidase-like	Olive
LOC111404609	0.836025	1.78513	0.0227168	0.0412186	XP_022889161.1	raucaffricine-O-beta-D-glucosidase-like	Olive
LOC111403821	2.98905	7.93953	1.99e-15	1.36e-14	XP_022888214.1	raucaffricine-O-beta-D-glucosidase-like,_transcript_variant_X3	Olive
LOC111399368	3.51673	11.4457	8.52e-106	5.54e-104	XP_022882405.1	repetitive_proline-rich_cell_wall_protein_1,_transcript_variant_X3	Olive
LOC111396810	1.91985	3.78383	7.37e-11	3.76e-10	XP_022879101.1	rhamnogalacturonate_lyase_B	Olive
LOC111367487	1.24579	2.37148	3.07e-09	1.38e-08	XP_022844160.1	rhamnogalacturonate_lyase_B	Olive
LOC111396809	1.6916	3.23015	6.09e-14	3.81e-13	XP_022879100.1	rhamnogalacturonate_lyase_B,_transcript_variant_X2	Olive
LOC111383909	0.598442	1.51408	0.0125633	0.024183	XP_022863868.1	SWR1_complex_subunit_2	Olive
LOC111397146	1.14633	2.2135	1.56e-08	6.6e-08	XP_022879672.1	UDP-rhamnose:rhamnosyltransferase_1	Olive
LOC111367188	3.27796	9.69985	1.13e-132	1.08e-130	XP_022843702.1	vegetative_cell_wall_protein_gp1-like	Olive
LOC111380713	3.02532	8.14165	9.03e-27	1.05e-25	XP_022860116.1	vegetative_cell_wall_protein_gp1-like	Olive
LOC111376861	2.39321	5.25326	1.69e-69	6.17e-68	XP_022855634.1	vegetative_cell_wall_protein_gp1-like	Olive
LOC111411458	2.15317	4.44803	9.39e-27	1.09e-25	XP_022897756.1	vegetative_cell_wall_protein_gp1-like	Olive
LOC111377440	1.4985	2.8255	3.11e-20	2.72e-19	XP_022856300.1	vegetative_cell_wall_protein_gp1-like	Olive
LOC111410408	0.532538	1.44647	0.00440527	0.00925844	XP_022896488.1	vegetative_cell_wall_protein_gp1-like	Olive
LOC111396654	2.24121	4.72795	1.08e-33	1.62e-32	XP_022878863.1	xyloglucan_endotransglucosylase/hydrolase_2-like	Olive
LOC111387165	0.860973	1.81626	0.022105	0.0402738	XP_022867470.1	xyloglucan_endotransglucosylase/hydrolase_protein_10	Olive
LOC111387295	3.31112	9.92536	9.46e-33	1.38e-31	XP_022867613.1	xyloglucan_endotransglucosylase/hydrolase_protein_23	Olive
LOC111382429	2.42498	5.3702	4.28e-30	5.67e-29	XP_022862171.1	xyloglucan_endotransglucosylase/hydrolase_protein_31-like	Olive
LOC111370403	1.7739	3.41976	0.00118761	0.0027528	XP_022847860.1	xyloglucan_endotransglucosylase/hydrolase_protein_9-like	Olive
LOC111370402	1.87328	3.66364	1.88e-24	1.99e-23	XP_022847859.1	xyloglucan_endotransglucosylase/hydrolase_protein_9-like,_transcript_variant_X2	Olive
LOC111380051	1.55021	2.92861	5.48e-11	2.83e-10	XP_022859281.1	xyloglucan_endotransglucosylase/hydrolase_protein_B	Olive

## Sheet: P14 vs. P0_DOWN
P14 vs. P0_DOWN
Genes	log2FoldChange	FoldChange	pvalue	padj	Gene_ID	description	Organism
LOC111393198	-5.84072	-57.3102	7.77e-107	5.14e-105	XP_022874390.1	acid_beta-fructofuranosidase_2,_vacuolar-like	Olive
LOC111385780	-1.48263	-2.79458	2.84e-46	6.23e-45	XP_022865962.1	acid_beta-fructofuranosidase-like	Olive
LOC111377103	-1.73401	-3.3265	2.16e-06	7.32e-06	XP_022855922.1	acid_beta-fructofuranosidase-like	Olive
LOC111377104	-1.90612	-3.748	1.65e-14	1.08e-13	XP_022855923.1	acid_beta-fructofuranosidase-like	Olive
LOC111412575	-3.50085	-11.3204	1.01e-35	1.62e-34	XP_022899279.1	acid_beta-fructofuranosidase-like	Olive
LOC111382484	-6.91489	-120.667	9.94e-21	8.9e-20	XP_022862245.1	acidic_mammalian_chitinase-like	Olive
LOC111386601	-0.546924	-1.46097	0.00268212	0.00585502	XP_022867041.1	alpha-galactosidase_3-like,_transcript_variant_X4	Olive
LOC111401756	-1.84628	-3.59573	8.41e-14	5.21e-13	XP_022885408.1	alpha-galactosidase-like	Olive
LOC111404030	-0.544212	-1.45822	0.000347137	0.000874761	XP_022888514.1	alpha-L-arabinofuranosidase_1-like,_transcript_variant_X2	Olive
LOC111399588	-1.24595	-2.37175	6.18e-08	2.45e-07	XP_022882758.1	alpha-L-arabinofuranosidase_1-like,_transcript_variant_X3	Olive
LOC111397932	-2.7964	-6.94705	8.48e-17	6.28e-16	XP_022880682.1	arabinogalactan_peptide_14-like	Olive
LOC111398580	-0.820574	-1.76611	0.000428339	0.00106345	XP_022881316.1	arabinogalactan_peptide_22-like,_transcript_variant_X2	Olive
LOC111379188	-1.10264	-2.14747	1.22e-05	3.76e-05	XP_022858302.1	basic_endochitinase-like	Olive
LOC111395759	-0.823218	-1.76935	2.15e-05	6.41e-05	XP_022877662.1	beta-(1,2)-xylosyltransferase-like,_transcript_variant_X2	Olive
LOC111403607	-0.650927	-1.57018	0.000209483	0.00054605	XP_022887942.1	beta-1,3-galactosyltransferase_7-like	Olive
LOC111373023	-1.36787	-2.58089	1.46e-21	1.36e-20	XP_022851244.1	beta-1,3-galactosyltransferase_7-like	Olive
LOC111401097	-0.835897	-1.78497	0.001725	0.00388622	XP_022884422.1	beta-1,3-galactosyltransferase_7-like,_transcript_variant_X3	Olive
LOC111367849	-3.78255	-13.7613	2.79e-17	2.12e-16	XP_022844686.1	beta-1,3-galactosyltransferase_7-like,_transcript_variant_X4	Olive
LOC111399363	-3.29809	-9.83616	4.64e-40	8.47e-39	XP_022882398.1	beta-1,4-mannosyl-glycoprotein_4-beta-N-acetylglucosaminyltransferase	Olive
LOC111369314	-1.98276	-3.95248	2.48e-40	4.56e-39	XP_022846556.1	beta-1,4-mannosyl-glycoprotein_4-beta-N-acetylglucosaminyltransferase-like	Olive
LOC111403379	-1.43743	-2.70838	1.51e-27	1.83e-26	XP_022887637.1	beta-1,4-mannosyl-glycoprotein_4-beta-N-acetylglucosaminyltransferase-like,_transcript_variant_X2	Olive
LOC111371327	-2.26954	-4.82171	3.97e-111	2.81e-109	XP_022849015.1	beta-D-xylosidase_1-like	Olive
LOC111397415	-1.32654	-2.50801	4.69e-19	3.89e-18	XP_022880095.1	beta-D-xylosidase_7,_transcript_variant_X2	Olive
LOC111404715	-1.02202	-2.03076	3.24e-08	1.33e-07	XP_022889250.1	beta-fructofuranosidase,_insoluble_isoenzyme_1-like	Olive
LOC111405108	-6.04206	-65.8933	6.44e-282	4.61e-279	XP_022889601.1	beta-fructofuranosidase,_insoluble_isoenzyme_1-like	Olive
LOC111388426	-10.0702	-1075.09	4.49e-213	1.44e-210	XP_022868891.1	beta-fructofuranosidase,_insoluble_isoenzyme_1-like	Olive
LOC111383352	-3.1417	-8.82563	5.77e-44	1.19e-42		beta-fructofuranosidase,_soluble_isoenzyme_I-like	Olive
LOC111374877	-6.56974	-94.9921	1.2e-47	2.75e-46	XP_022853404.1	beta-galactosidase_13-like	Olive
LOC111385282	-6.34471	-81.2734	1.66e-22	1.63e-21		beta-galactosidase_14-like	Olive
LOC111401305	-1.79391	-3.46753	5.96e-08	2.37e-07	XP_022884756.1	beta-galactosidase_5-like	Olive
LOC111380683	-0.72258	-1.65013	9.07e-05	0.000249044	XP_022860081.1	beta-galactosidase_8,_transcript_variant_X2	Olive
LOC111405100	-0.865601	-1.8221	9.45e-08	3.68e-07	XP_022889588.1	beta-galactosidase-like	Olive
LOC111387481	-4.29886	-19.6828	5.39e-154	6.84e-152	XP_022867803.1	beta-galactosidase-like	Olive
LOC111370760	-0.974199	-1.96455	0.00262545	0.00574025	XP_022848392.1	beta-glucosidase_18-like	Olive
LOC111389452	-2.67758	-6.39784	3.54e-22	3.41e-21		beta-glucosidase_18-like	Olive
LOC111392261	-2.10181	-4.29247	4.18e-23	4.19e-22		beta-glucosidase_34-like	Olive
LOC111382064	-2.33501	-5.04556	1.07e-22	1.06e-21	XP_022861696.1	beta-glucosidase_6-like	Olive
LOC111391290	-0.817561	-1.76242	5.27e-06	1.7e-05	XP_022872235.1	beta-glucosidase_BoGH3B-like	Olive
LOC111378802	-3.38945	-10.4791	5.55e-65	1.87e-63	XP_022857824.1	beta-glucosidase_BoGH3B-like	Olive
LOC111383917	-5.94389	-61.5588	4.57e-77	1.93e-75	XP_022863883.1	beta-glucosidase_BoGH3B-like	Olive
LOC111405869	-1.43855	-2.71048	2.56e-13	1.54e-12	XP_022890719.1	beta-glucosidase_BoGH3B-like,_transcript_variant_X2	Olive
LOC111395627	-5.99765	-63.896	1.47e-142	1.62e-140	XP_022877479.1	beta-glucuronosyltransferase_GlcAT14A-like	Olive
LOC111408286	-0.882108	-1.84307	2.2e-10	1.08e-09	XP_022893830.1	beta-xylosidase/alpha-L-arabinofuranosidase_2-like	Olive
LOC111366743	-0.788664	-1.72747	4.05e-05	0.000116619	XP_022843209.1	callose_synthase_12-like	Olive
LOC111401122	-5.11361	-34.6219	1.22e-115	9.13e-114	XP_022884469.1	callose_synthase_5-like	Olive
LOC111397057	-6.34717	-81.4118	7.98e-119	6.3e-117	XP_022879526.1	callose_synthase_5-like	Olive
LOC111409143	-4.69599	-25.92	1.34e-114	9.78e-113	XP_022894873.1	callose_synthase_5-like,_transcript_variant_X2	Olive
LOC111379730	-0.439508	-1.35614	0.0051278	0.0106604	XP_022858936.1	carboxyl-terminal-processing_peptidase_2,_chloroplastic-like	Olive
LOC111400331	-1.54388	-2.91577	2.71e-14	1.74e-13	XP_022883514.1	cell_wall_/_vacuolar_inhibitor_of_fructosidase_1-like	Olive
LOC111397054	-1.91683	-3.77594	1.04e-11	5.61e-11	XP_022879523.1	cell_wall_/_vacuolar_inhibitor_of_fructosidase_2-like	Olive
LOC111381112	-6.36929	-82.6701	2.34e-156	3.12e-154	XP_022860607.1	cellulose_synthase-like_protein_D1	Olive
LOC111396367	-0.381938	-1.30309	0.000860873	0.0020442	XP_022878564.1	cellulose_synthase-like_protein_D3,_transcript_variant_X5	Olive
LOC111405688	-3.33304	-10.0773	5.35e-130	4.95e-128	XP_022890453.1	cellulose_synthase-like_protein_D4	Olive
LOC111383887	-8.877	-470.158	2.23e-75	9.16e-74		cellulose_synthase-like_protein_D4	Olive
LOC111369643	-2.84993	-7.20967	1.82e-12	1.04e-11	XP_022847006.1	chitinase_2-like	Olive
LOC111369641	-3.36628	-10.3122	8.12e-93	4.43e-91	XP_022847003.1	chitinase_2-like	Olive
LOC111369642	-4.01225	-16.1364	1.06e-60	3.31e-59	XP_022847005.1	chitinase_2-like	Olive
LOC111374727	-2.52679	-5.76289	1.89e-08	7.89e-08	XP_022853223.1	chitinase_5-like	Olive
LOC111400814	-5.63827	-49.8069	0	0	XP_022883991.1	classical_arabinogalactan_protein_11-like	Olive
LOC111372794	-1.76997	-3.41046	6.77e-06	2.15e-05	XP_022850969.1	classical_arabinogalactan_protein_1-like	Olive
LOC111390511	-4.05286	-16.5971	1.3e-196	2.97e-194	XP_022871328.1	classical_arabinogalactan_protein_4-like	Olive
LOC111391262	-0.639969	-1.5583	0.00597333	0.0122659	XP_022872206.1	classical_arabinogalactan_protein_9-like	Olive
LOC111392399	-2.03476	-4.09754	2.78e-13	1.67e-12	XP_022873508.1	dirigent_protein_5-like	Olive
LOC111409775	-0.589308	-1.50452	5.09e-07	1.85e-06	XP_022895581.1	endo-1,3(4)-beta-glucanase_2-like	Olive
LOC111374555	-0.693318	-1.617	5.08e-05	0.000144351		endo-1,3(4)-beta-glucanase_ARB_01444	Olive
LOC111382147	-0.970605	-1.95966	2.65e-05	7.82e-05	XP_022861798.1	endo-1,31,4-beta-D-glucanase-like,_transcript_variant_X2	Olive
LOC111396613	-1.06545	-2.09282	7.53e-08	2.97e-07	XP_022878796.1	endo-1,31,4-beta-D-glucanase-like,_transcript_variant_X2	Olive
LOC111393512	-0.573951	-1.4886	0.00118344	0.00274429	XP_022874844.1	endochitinase_EP3-like	Olive
LOC111378938	-5.99942	-63.9741	8.38e-77	3.51e-75	XP_022857998.1	endoglucanase_10-like	Olive
LOC111402464	-1.60553	-3.04307	1.11e-12	6.43e-12	XP_022886556.1	endoglucanase_11-like,_transcript_variant_X2	Olive
LOC111384507	-2.97023	-7.83659	9.48e-42	1.82e-40	XP_022864556.1	endoglucanase_12-like	Olive
LOC111399239	-5.51887	-45.8506	4.56e-31	6.27e-30	XP_022882271.1	endoglucanase_16	Olive
LOC111402885	-1.23227	-2.34937	6.24e-12	3.43e-11	XP_022886967.1	endoglucanase_6-like	Olive
LOC111393999	-3.21989	-9.31713	2.44e-105	1.57e-103	XP_022875559.1	endoglucanase_6-like	Olive
LOC111385774	-1.99368	-3.9825	2e-29	2.6e-28	XP_022865957.1	endoglucanase-like	Olive
LOC111371180	-2.01835	-4.05121	8.28e-30	1.09e-28	XP_022848852.1	endoglucanase-like	Olive
LOC111392407	-0.544888	-1.45891	2.08e-06	7.07e-06	XP_022873528.1	endoglucanase-like,_transcript_variant_X9	Olive
LOC111391534	-5.6624	-50.6469	4.99e-197	1.16e-194	XP_022872535.1	exopolygalacturonase-like	Olive
LOC111381744	-5.82599	-56.728	1.53e-145	1.73e-143	XP_022861327.1	exopolygalacturonase-like	Olive
LOC111404918	-5.90871	-60.0756	1.17e-181	2.19e-179	XP_022889410.1	exopolygalacturonase-like	Olive
LOC111368446	-6.41958	-85.6025	8.31e-150	1.01e-147	XP_022845434.1	exopolygalacturonase-like	Olive
LOC111388343	-7.66177	-202.499	0	0	XP_022868791.1	exopolygalacturonase-like	Olive
LOC111389258	-8.73086	-424.863	0	0	XP_022869931.1	exopolygalacturonase-like	Olive
LOC111389264	-6.6137	-97.9314	1.26e-225	4.47e-223	XP_022869947.1	exopolygalacturonase-like,_transcript_variant_X4	Olive
LOC111376668	-5.68623	-51.4905	1.45e-185	2.9e-183	XP_022855408.1	expansin-A11-like	Olive
LOC111381068	-5.94314	-61.5269	3.02e-184	5.94e-182	XP_022860549.1	expansin-A11-like,_transcript_variant_X2	Olive
LOC111367160	-1.49189	-2.81258	1.52e-33	2.27e-32	XP_022843661.1	expansin-A15-like	Olive
LOC111403335	-1.54285	-2.91369	9.89e-35	1.53e-33	XP_022887560.1	expansin-A15-like	Olive
LOC111376709	-1.85201	-3.61003	9.11e-15	6.01e-14	XP_022855450.1	expansin-A1-like	Olive
LOC111384671	-0.774586	-1.7107	1.03e-05	3.18e-05	XP_022864754.1	expansin-A8-like	Olive
LOC111377178	-2.64431	-6.25196	4.54e-12	2.52e-11	XP_022856000.1	expansin-A8-like	Olive
LOC111385342	-3.57224	-11.8946	1.92e-92	1.04e-90	XP_022865492.1	expansin-A8-like	Olive
LOC111397188	-4.44746	-21.8182	1.14e-166	1.72e-164	XP_022879735.1	expansin-A8-like	Olive
LOC111377292	-7.0797	-135.27	6.58e-11	3.37e-10	XP_022856136.1	expansin-B2	Olive
LOC111412123	-2.09034	-4.25849	4.35e-52	1.1e-50	XP_022898668.1	expansin-like_A2	Olive
LOC111407501	-1.70783	-3.2667	1.56e-16	1.14e-15	XP_022892783.1	expansin-like_B1	Olive
LOC111393647	-4.75407	-26.9848	2.38e-90	1.25e-88	XP_022875060.1	extensin-like	Olive
LOC111411993	-0.864406	-1.82059	1.54e-05	4.66e-05	XP_022898478.1	extensin-like,_transcript_variant_X2	Olive
LOC111365401	-6.72598	-105.857	0	0	XP_022841719.1	fasciclin-like_arabinogalactan_protein_14	Olive
LOC111367161	-0.516713	-1.43069	8.85e-05	0.000243427	XP_022843666.1	fasciclin-like_arabinogalactan_protein_16	Olive
LOC111366031	-0.452684	-1.36858	0.0031332	0.00674687	XP_022842423.1	fasciclin-like_arabinogalactan_protein_17	Olive
LOC111382447	-5.48294	-44.7229	2.61e-167	3.98e-165	XP_022862193.1	fasciclin-like_arabinogalactan_protein_3	Olive
LOC111370406	-0.877376	-1.83703	6.12e-14	3.82e-13	XP_022847862.1	galactan_beta-1,4-galactosyltransferase_GALS2-like	Olive
LOC111389828	-2.3928	-5.25177	2.92e-10	1.42e-09	XP_022870573.1	galactan_beta-1,4-galactosyltransferase_GALS2-like	Olive
LOC111403880	-1.67195	-3.18644	9.45e-30	1.24e-28	XP_022888283.1	galactinol--sucrose_galactosyltransferase_2,_transcript_variant_X2	Olive
LOC111365945	-2.57214	-5.94691	2.75e-06	9.15e-06	XP_022842288.1	galactinol--sucrose_galactosyltransferase_2,_transcript_variant_X2	Olive
LOC111399541	-4.53044	-23.1099	7.29e-28	8.95e-27	XP_022882684.1	galactinol--sucrose_galactosyltransferase_2,_transcript_variant_X2	Olive
LOC111392579	-1.14377	-2.20958	2.26e-23	2.3e-22	XP_022873704.1	galactinol--sucrose_galactosyltransferase_5	Olive
LOC111383507	-0.616686	-1.53335	1e-06	3.52e-06	XP_022863390.1	galactinol--sucrose_galactosyltransferase_6	Olive
LOC111402259	-1.99568	-3.98804	5.73e-39	1.01e-37	XP_022886198.1	galactinol--sucrose_galactosyltransferase_6	Olive
LOC111368602	-0.473543	-1.38851	0.00441075	0.00926881	XP_022845715.1	galacturonosyltransferase_10	Olive
LOC111380650	-0.794875	-1.73493	9.96e-08	3.87e-07	XP_022860046.1	galacturonosyltransferase_10	Olive
LOC111387986	-0.927263	-1.90166	1.14e-11	6.14e-11	XP_022868410.1	galacturonosyltransferase_11,_transcript_variant_X5	Olive
LOC111370785	-2.03234	-4.09068	6.22e-45	1.32e-43	XP_022848419.1	galacturonosyltransferase_12	Olive
LOC111410054	-2.09199	-4.26337	1.38e-26	1.6e-25	XP_022895987.1	galacturonosyltransferase_13	Olive
LOC111400910	-0.518193	-1.43216	2.4e-05	7.12e-05	XP_022884140.1	galacturonosyltransferase_13,_transcript_variant_X2	Olive
LOC111410063	-2.01128	-4.0314	1.04e-21	9.82e-21	XP_022896003.1	galacturonosyltransferase_13,_transcript_variant_X2	Olive
LOC111367175	-0.590874	-1.50616	7.64e-07	2.72e-06	XP_022843686.1	galacturonosyltransferase_14	Olive
LOC111396948	-1.59131	-3.01323	4.12e-30	5.45e-29	XP_022879348.1	galacturonosyltransferase_14,_transcript_variant_X3	Olive
LOC111410507	-0.348479	-1.27322	0.0204668	0.03757	XP_022896641.1	galacturonosyltransferase_3,_transcript_variant_X4	Olive
LOC111387921	-0.364015	-1.287	0.00162971	0.00368911	XP_022868313.1	galacturonosyltransferase_4	Olive
LOC111411845	-0.94124	-1.92018	2.37e-06	7.98e-06	XP_022898245.1	galacturonosyltransferase_6	Olive
LOC111391428	-1.79122	-3.46108	1.96e-26	2.25e-25	XP_022872415.1	galacturonosyltransferase_6,_transcript_variant_X2	Olive
LOC111369784	-0.358101	-1.28174	0.00867586	0.0172619	XP_022847191.1	galacturonosyltransferase_8-like	Olive
LOC111367899	-0.580648	-1.49552	7.27e-06	2.3e-05	XP_022844775.1	galacturonosyltransferase_9,_transcript_variant_X2	Olive
LOC111400985	-1.73947	-3.33913	4.61e-22	4.41e-21	XP_022884258.1	galacturonosyltransferase-like_1	Olive
LOC111400856	-1.80248	-3.48818	5.43e-17	4.08e-16	XP_022884067.1	galacturonosyltransferase-like_10	Olive
LOC111365766	-5.32294	-40.028	9.43e-128	8.39e-126	XP_022842064.1	galacturonosyltransferase-like_4	Olive
LOC111388542	-5.56078	-47.202	4.66e-193	1.02e-190	XP_022869044.1	galacturonosyltransferase-like_4	Olive
LOC111369881	-5.64655	-50.0935	3.66e-231	1.45e-228	XP_022847358.1	galacturonosyltransferase-like_4	Olive
LOC111394176	-0.439163	-1.35582	0.0173158	0.0323186	XP_022875713.1	galacturonosyltransferase-like_7	Olive
LOC111376004	-1.59467	-3.02025	4.87e-31	6.68e-30	XP_022854700.1	galacturonosyltransferase-like_7	Olive
LOC111377283	-1.68963	-3.22573	1.95e-26	2.25e-25	XP_022856126.1	galacturonosyltransferase-like_9	Olive
LOC111387951	-2.77235	-6.83221	1.46e-119	1.16e-117	XP_022868352.1	galacturonosyltransferase-like_9	Olive
LOC111366890	-0.724355	-1.65216	2.61e-06	8.72e-06	XP_022843342.1	glucan_1,3-alpha-glucosidase	Olive
LOC111412811	-7.1724	-144.248	0	0	XP_022899478.1	glucan_endo-1,3-beta-D-glucosidase	Olive
LOC111412810	-9.37533	-664.132	3.73e-36	6.06e-35	XP_022899477.1	glucan_endo-1,3-beta-D-glucosidase-like	Olive
LOC111407975	-1.00118	-2.00163	7.86e-13	4.58e-12	XP_022893476.1	glucan_endo-1,3-beta-glucosidase_11-like,_transcript_variant_X4	Olive
LOC111400625	-1.05275	-2.07448	2.1e-13	1.27e-12	XP_022883795.1	glucan_endo-1,3-beta-glucosidase_14-like	Olive
LOC111385299	-1.60184	-3.03529	7.38e-40	1.34e-38		glucan_endo-1,3-beta-glucosidase_14-like	Olive
LOC111395746	-6.93063	-121.991	1.53e-27	1.85e-26	XP_022877648.1	glucan_endo-1,3-beta-glucosidase_14-like	Olive
LOC111373146	-1.04338	-2.06105	0.00434596	0.00914121	XP_022851396.1	glucan_endo-1,3-beta-glucosidase_14-like,_transcript_variant_X3	Olive
LOC111408048	-0.611878	-1.52825	0.0033759	0.00723613	XP_022893579.1	glucan_endo-1,3-beta-glucosidase_4-like	Olive
LOC111367648	-5.59317	-48.2739	7.66e-202	2.04e-199	XP_022844402.1	glucan_endo-1,3-beta-glucosidase_8-like	Olive
LOC111373003	-5.60721	-48.7459	9.4e-156	1.25e-153	XP_022851218.1	glucan_endo-1,3-beta-glucosidase_8-like	Olive
LOC111410888	-5.63365	-49.6475	3.57e-245	1.58e-242	XP_022897253.1	glucan_endo-1,3-beta-glucosidase-like	Olive
LOC111397456	-7.40414	-169.382	0	0	XP_022880171.1	glucan_endo-1,3-beta-glucosidase-like	Olive
LOC111378168	-0.832273	-1.78049	1.15e-09	5.34e-09	XP_022857100.1	glucuronoxylan_glucuronosyltransferase_IRX7	Olive
LOC111382428	-1.22536	-2.33815	7.03e-09	3.06e-08	XP_022862170.1	glucuronoxylan_glucuronosyltransferase_IRX7,_transcript_variant_X2	Olive
LOC111368556	-0.531208	-1.44514	0.00927686	0.0183534	XP_022845633.1	glycine-rich_cell_wall_structural_protein_1	Olive
LOC111400639	-1.84795	-3.59988	2.28e-14	1.47e-13	XP_022883804.1	glycine-rich_cell_wall_structural_protein_1	Olive
LOC111370572	-13.1792	-9275.37	1.2e-29	1.57e-28	XP_022848109.1	glycine-rich_cell_wall_structural_protein_1.0-like	Olive
LOC111403604	-1.41831	-2.67271	7.65e-17	5.68e-16	XP_022887940.1	glycine-rich_cell_wall_structural_protein_1.8-like	Olive
LOC111394375	-2.10627	-4.30575	6.71e-09	2.93e-08	XP_022875926.1	glycine-rich_cell_wall_structural_protein_1.8-like	Olive
LOC111371994	-1.16494	-2.24223	0.000169193	0.00044639	XP_022849902.1	glycine-rich_cell_wall_structural_protein_1-like	Olive
LOC111373619	-1.88054	-3.68213	6.9e-06	2.19e-05	XP_022851941.1	glycine-rich_cell_wall_structural_protein_2-like	Olive
LOC111387128	-2.53684	-5.80316	1.86e-23	1.9e-22	XP_022867428.1	glycine-rich_cell_wall_structural_protein-like	Olive
LOC111391653	-4.26104	-19.1735	4.4e-27	5.19e-26	XP_022872674.1	invertase_inhibitor	Olive
LOC111381417	-6.13064	-70.066	6.38e-111	4.5e-109	XP_022860964.1	laccase-3-like	Olive
LOC111396337	-1.64142	-3.11973	2.33e-30	3.12e-29	XP_022878514.1	leucine-rich_repeat_extensin-like_protein_3	Olive
LOC111399045	-4.42972	-21.5515	4.12e-176	7.1e-174	XP_022882025.1	leucine-rich_repeat_extensin-like_protein_3	Olive
LOC111387770	-4.58132	-23.9395	2.82e-112	2.02e-110	XP_022868126.1	leucine-rich_repeat_extensin-like_protein_3,_transcript_variant_X2	Olive
LOC111398727	-1.52295	-2.87379	1.94e-13	1.18e-12	XP_022881554.1	leucine-rich_repeat_extensin-like_protein_4	Olive
LOC111411363	-1.97896	-3.94208	4.24e-17	3.2e-16	XP_022897674.1	leucine-rich_repeat_extensin-like_protein_4	Olive
LOC111398478	-0.453408	-1.36927	0.00695402	0.0140937	XP_022881161.1	leucine-rich_repeat_extensin-like_protein_5	Olive
LOC111368665	-0.833817	-1.78239	1.11e-05	3.42e-05	XP_022845813.1	lipase_YOR059C,_transcript_variant_X2	Olive
LOC111386384	-1.3819	-2.60611	1.73e-15	1.19e-14	XP_022866610.1	lysine-rich_arabinogalactan_protein_19	Olive
LOC111372141	-1.49922	-2.82689	6.72e-10	3.18e-09	XP_022850102.1	mannan_endo-1,4-beta-mannosidase_2-like	Olive
LOC111388883	-2.08442	-4.24106	5.42e-69	1.96e-67	XP_022869478.1	mannan_endo-1,4-beta-mannosidase_2-like	Olive
LOC111382701	-1.21182	-2.3163	6.48e-15	4.31e-14	XP_022862509.1	mannan_endo-1,4-beta-mannosidase_2-like,_transcript_variant_X2	Olive
LOC111372956	-3.25225	-9.5285	6.84e-47	1.53e-45		mannan_endo-1,4-beta-mannosidase_5-like	Olive
LOC111389730	-3.29933	-9.84457	2.63e-57	7.58e-56	XP_022870447.1	mannan_endo-1,4-beta-mannosidase_5-like,_transcript_variant_X3	Olive
LOC111397355	-1.90829	-3.75365	3.9e-20	3.4e-19	XP_022880016.1	mannan_endo-1,4-beta-mannosidase_7-like	Olive
LOC111401579	-1.12097	-2.17493	5.85e-09	2.56e-08	XP_022885149.1	mannosyl-oligosaccharide_1,2-alpha-mannosidase_MNS1	Olive
LOC111366933	-0.807088	-1.74968	0.000198031	0.000517522	XP_022843384.1	mannosyl-oligosaccharide_1,2-alpha-mannosidase_MNS1-like	Olive
LOC111390177	-1.24584	-2.37157	0.0080781	0.0161682	XP_022870952.1	mannosyl-oligosaccharide_1,2-alpha-mannosidase_MNS1-like	Olive
LOC111374719	-0.520736	-1.43469	0.0195025	0.0359765	XP_022853216.1	mannosyl-oligosaccharide_1,2-alpha-mannosidase_MNS1-like,_transcript_variant_X4	Olive
LOC111402240	-0.875972	-1.83524	1.74e-14	1.13e-13	XP_022886174.1	mannosyl-oligosaccharide_1,2-alpha-mannosidase_MNS3-like	Olive
LOC111367127	-0.609316	-1.52554	7.76e-06	2.44e-05	XP_022843620.1	pectate_lyase_18	Olive
LOC111389222	-1.61124	-3.05515	5.86e-14	3.67e-13	XP_022869881.1	pectate_lyase_4	Olive
LOC111379453	-5.28288	-38.9319	3.67e-125	3.12e-123	XP_022858593.1	pectate_lyase_8	Olive
LOC111400823	-6.01143	-64.5089	2e-238	8.2e-236	XP_022884005.1	pectate_lyase_P59	Olive
LOC111375537	-6.43678	-86.6291	0	0	XP_022854141.1	pectate_lyase_P59	Olive
LOC111372517	-4.79051	-27.6749	7.05e-75	2.87e-73	XP_022850632.1	pectate_lyase-like	Olive
LOC111386622	-6.3767	-83.0958	2.01e-182	3.81e-180	XP_022866858.1	pectate_lyase-like	Olive
LOC111382253	-2.92074	-7.57234	9.06e-43	1.8e-41	XP_022861935.1	pectin_acetylesterase_12-like	Olive
LOC111391823	-3.10751	-8.61894	5.61e-11	2.89e-10		pectin_acetylesterase_8-like	Olive
LOC111386375	-3.34575	-10.1665	2.18e-47	4.95e-46		pectin_acetylesterase_8-like	Olive
LOC111380396	-5.67713	-51.1666	1.71e-98	1.01e-96		pectin_acetylesterase_8-like	Olive
LOC111391121	-7.80439	-223.54	1.41e-76	5.9e-75	XP_022872037.1	pectin_acetylesterase_8-like,_transcript_variant_X2	Olive
LOC111402995	-0.960273	-1.94568	1.09e-09	5.06e-09	XP_022887098.1	pectin_acetylesterase_9,_transcript_variant_X2	Olive
LOC111399065	-1.1689	-2.2484	6.57e-09	2.87e-08	XP_022882054.1	pectinesterase	Olive
LOC111381746	-5.65306	-50.3201	5.97e-272	3.72e-269	XP_022861329.1	pectinesterase	Olive
LOC111401624	-0.977883	-1.96957	1.48e-12	8.51e-12	XP_022885214.1	pectinesterase/pectinesterase_inhibitor_26	Olive
LOC111379884	-5.45843	-43.9696	8.3e-173	1.36e-170	XP_022859094.1	pectinesterase/pectinesterase_inhibitor_28	Olive
LOC111386790	-1.16359	-2.24014	3.35e-19	2.79e-18	XP_022867034.1	pectinesterase/pectinesterase_inhibitor_34	Olive
LOC111402940	-1.68078	-3.20602	1.42e-20	1.26e-19	XP_022887039.1	pectinesterase/pectinesterase_inhibitor_34	Olive
LOC111403813	-5.59924	-48.4775	2.11e-159	2.89e-157	XP_022888201.1	pectinesterase/pectinesterase_inhibitor_45	Olive
LOC111397052	-0.473957	-1.38891	1.37e-06	4.74e-06	XP_022879513.1	pectinesterase/pectinesterase_inhibitor_51	Olive
LOC111387527	-0.849296	-1.80162	4.07e-05	0.000117191	XP_022867865.1	pectinesterase/pectinesterase_inhibitor_51	Olive
LOC111367809	-3.03719	-8.20889	3.13e-89	1.62e-87	XP_022844639.1	pectinesterase/pectinesterase_inhibitor_51,_transcript_variant_X2	Olive
LOC111373913	-3.88924	-14.8176	1.3e-140	1.38e-138	XP_022852277.1	pectinesterase/pectinesterase_inhibitor_PPE8B-like	Olive
LOC111403925	-6.41402	-85.2729	1.24e-214	4.04e-212	XP_022888359.1	pectinesterase_1	Olive
LOC111367315	-2.80121	-6.97026	5.17e-113	3.73e-111	XP_022843895.1	pectinesterase_1-like	Olive
LOC111379954	-8.41915	-342.308	0	0	XP_022859160.1	pectinesterase_1-like	Olive
LOC111405716	-3.63839	-12.4527	1.36e-36	2.22e-35	XP_022890493.1	pectinesterase_53	Olive
LOC111371342	-5.84845	-57.6179	1.12e-20	1e-19	XP_022849032.1	pectinesterase_67	Olive
LOC111371037	-6.08562	-67.9133	1.26e-34	1.94e-33	XP_022848726.1	pectinesterase_67	Olive
LOC111373914	-3.56512	-11.8361	1.19e-50	2.91e-49	XP_022852279.1	pectinesterase-like	Olive
LOC111374325	-5.38002	-41.6436	3.48e-201	9.13e-199	XP_022852750.1	pectinesterase-like	Olive
LOC111400083	-5.50079	-45.2795	9.55e-131	8.95e-129	XP_022883301.1	pectinesterase-like	Olive
LOC111408081	-5.66536	-50.7508	1.66e-184	3.29e-182	XP_022893622.1	pectinesterase-like	Olive
LOC111374323	-5.77504	-54.7597	1.02e-186	2.06e-184	XP_022852746.1	pectinesterase-like	Olive
LOC111371494	-6.04699	-66.119	0	0	XP_022849290.1	pectinesterase-like	Olive
LOC111373189	-6.31409	-79.5667	3.82e-270	2.29e-267	XP_022851456.1	pectinesterase-like	Olive
LOC111367069	-0.717534	-1.64437	5.22e-07	1.89e-06	XP_022843536.1	pollen-specific_leucine-rich_repeat_extensin-like_protein_1	Olive
LOC111384818	-6.20335	-73.6874	6.29e-248	3.07e-245	XP_022864919.1	pollen-specific_leucine-rich_repeat_extensin-like_protein_1	Olive
LOC111379790	-5.35081	-40.8088	1.55e-170	2.45e-168		pollen-specific_leucine-rich_repeat_extensin-like_protein_3	Olive
LOC111384183	-5.1407	-35.2781	0	0		pollen-specific_leucine-rich_repeat_extensin-like_protein_4	Olive
LOC111409207	-0.6366	-1.55466	0.000135736	0.000362989	XP_022894972.1	polygalacturonase	Olive
LOC111401119	-2.44093	-5.42993	1.7e-41	3.24e-40	XP_022884463.1	polygalacturonase	Olive
LOC111381541	-4.50721	-22.7408	3.34e-127	2.96e-125	XP_022861098.1	polygalacturonase	Olive
LOC111410938	-3.90202	-14.9494	2.48e-17	1.89e-16	XP_022897298.1	polygalacturonase_At1g48100-like	Olive
LOC111396841	-4.04782	-16.5393	1.26e-19	1.08e-18	XP_022879150.1	polygalacturonase_QRT3-like	Olive
LOC111396326	-0.719679	-1.64682	0.000904173	0.00213887	XP_022878501.1	polygalacturonase-like	Olive
LOC111397788	-1.20667	-2.30804	1.18e-10	5.93e-10	XP_022880536.1	polygalacturonase-like	Olive
LOC111402363	-6.11257	-69.1936	5.26e-242	2.27e-239	XP_022886369.1	protein_CELLULOSE_SYNTHASE_INTERACTIVE_3-like	Olive
LOC111402983	-1.63046	-3.09612	9.04e-08	3.53e-07	XP_022887086.1	protein_DETOXIFICATION_35-like	Olive
LOC111387239	-2.05354	-4.15123	2.12e-39	3.79e-38	XP_022867551.1	protein_EARLY_RESPONSIVE_TO_DEHYDRATION_15-like,_transcript_variant_X5	Olive
LOC111407647	-0.586862	-1.50198	0.000708989	0.00170314	XP_022893031.1	protein_KINESIN_LIGHT_CHAIN-RELATED_1-like	Olive
LOC111366013	-1.06379	-2.09042	1.06e-06	3.71e-06	XP_022842393.1	protein_OS-9_homolog	Olive
LOC111398419	-0.728245	-1.65662	5.8e-09	2.54e-08	XP_022881088.1	protein_PECTIC_ARABINOGALACTAN_SYNTHESIS-RELATED-like	Olive
LOC111382027	-1.95772	-3.88447	5.09e-23	5.09e-22	XP_022861654.1	protein_REDUCED_WALL_ACETYLATION_1-like	Olive
LOC111408284	-1.61279	-3.05843	4.43e-22	4.25e-21	XP_022893828.1	protein_REDUCED_WALL_ACETYLATION_3-like	Olive
LOC111397120	-0.515001	-1.42899	0.00529522	0.0109779	XP_022879635.1	protein_REDUCED_WALL_ACETYLATION_3-like,_transcript_variant_X3	Olive
LOC111380606	-2.89941	-7.46122	2.93e-35	4.6e-34	XP_022859997.1	repetitive_proline-rich_cell_wall_protein_2-like,_transcript_variant_X2	Olive
LOC111374924	-6.14699	-70.8646	0	0	XP_022853459.1	repetitive_proline-rich_cell_wall_protein_2-like,_transcript_variant_X4	Olive
LOC111375188	-0.906225	-1.87414	1.75e-09	8.03e-09	XP_022853756.1	reticulon-like_protein_B2	Olive
LOC111409294	-5.83804	-57.2037	0	0	XP_022895084.1	vegetative_cell_wall_protein_gp1-like	Olive
LOC111370995	-1.4729	-2.7758	8.55e-11	4.34e-10	XP_022848695.1	xyloglucan_endotransglucosylase/hydrolase_2-like	Olive
LOC111370998	-1.99847	-3.99575	4.52e-19	3.75e-18	XP_022848697.1	xyloglucan_endotransglucosylase/hydrolase_2-like	Olive
LOC111395524	-7.74042	-213.845	2.6e-151	3.18e-149	XP_022877314.1	xyloglucan_endotransglucosylase/hydrolase_2-like	Olive
LOC111395523	-8.16353	-286.726	7.81e-53	2.02e-51	XP_022877313.1	xyloglucan_endotransglucosylase/hydrolase_2-like	Olive
LOC111385517	-0.932599	-1.90871	1.84e-07	6.95e-07	XP_022865681.1	xyloglucan_endotransglucosylase/hydrolase_protein_23	Olive
LOC111391445	-1.06386	-2.09052	7.91e-06	2.49e-05	XP_022872439.1	xyloglucan_endotransglucosylase/hydrolase_protein_23	Olive
LOC111385523	-2.6982	-6.48992	1.21e-10	6.06e-10		xyloglucan_endotransglucosylase/hydrolase_protein_23	Olive
LOC111391439	-2.76674	-6.80568	5e-30	6.6e-29	XP_022872431.1	xyloglucan_endotransglucosylase/hydrolase_protein_23	Olive
LOC111399252	-2.28105	-4.86032	1.47e-69	5.35e-68	XP_022882288.1	xyloglucan_endotransglucosylase/hydrolase_protein_28	Olive
LOC111379713	-7.21504	-148.574	5.4e-21	4.9e-20	XP_022858918.1	xyloglucan_endotransglucosylase/hydrolase_protein_2-like	Olive
LOC111386844	-2.7074	-6.53143	2.59e-26	2.97e-25	XP_022867098.1	xyloglucan_endotransglucosylase/hydrolase_protein_30	Olive
LOC111383699	-3.02326	-8.13002	2.19e-96	1.26e-94	XP_022863600.1	xyloglucan_endotransglucosylase/hydrolase_protein_30	Olive
LOC111381242	-2.77954	-6.86635	2.3e-47	5.22e-46	XP_022860765.1	xyloglucan_endotransglucosylase/hydrolase_protein_30,_transcript_variant_X2	Olive
LOC111400446	-1.53946	-2.90686	0.000679212	0.0016357	XP_022883637.1	xyloglucan_endotransglucosylase/hydrolase_protein_32,_transcript_variant_X2	Olive
LOC111373347	-2.31084	-4.96173	3.19e-09	1.43e-08	XP_022851630.1	xyloglucan_endotransglucosylase/hydrolase_protein_33	Olive
LOC111408989	-1.97821	-3.94004	2.05e-46	4.52e-45	XP_022894638.1	xyloglucan_endotransglucosylase/hydrolase_protein_7	Olive
LOC111397229	-2.03435	-4.09638	1.61e-20	1.42e-19	XP_022879818.1	xyloglucan_endotransglucosylase/hydrolase_protein_7	Olive
LOC111401652	-3.15605	-8.91384	6.41e-68	2.25e-66	XP_022885264.1	xyloglucan_endotransglucosylase/hydrolase_protein_B	Olive
LOC111384947	-2.05915	-4.16741	2.39e-25	2.63e-24	XP_022865062.1	xyloglucan_glycosyltransferase_12	Olive

## Sheet: P28 vs. P14_UP
P28 vs. P14_UP
Genes	log2FoldChange	FoldChange	pvalue	padj	Gene_ID	description	Organism
LOC111384265	1.97236	3.9241	3.20727e-35	4.33187e-33	XP_022864296.1	21_kDa_protein-like	Olive
LOC111384263	1.45767	2.74664	1.38806e-21	7.66532e-20	XP_022864292.1	21_kDa_protein-like	Olive
LOC111410924	1.95719	3.88306	8.33875e-06	8.60511e-05	XP_022897286.1	acidic_endochitinase-like	Olive
LOC111405231	0.473956	1.38891	0.00193564	0.0107209	XP_022889800.1	aldose_1-epimerase-like	Olive
LOC111405919	1.50064	2.82969	2.54015e-07	3.40893e-06	XP_022890795.1	alpha-galactosidase_1-like	Olive
LOC111397171	1.44794	2.72819	5.37544e-06	5.75188e-05	XP_022879712.1	alpha-galactosidase_3-like	Olive
LOC111382423	0.449432	1.3655	0.00276748	0.0144996	XP_022862159.1	alpha-L-fucosidase_1-like	Olive
LOC111387812	0.453725	1.36957	0.00255392	0.013556	XP_022868169.1	alpha-xylosidase_1-like	Olive
LOC111382639	1.79871	3.4791	5.27095e-14	1.63682e-12		arabinogalactan_peptide_20-like	Olive
LOC111398580	1.39419	2.62841	2.86438e-06	3.22612e-05	XP_022881316.1	arabinogalactan_peptide_22-like,_transcript_variant_X2	Olive
LOC111385278	0.778638	1.71551	1.84625e-06	2.14551e-05	XP_022865427.1	arabinose_5-phosphate_isomerase	Olive
LOC111377030	0.630857	1.54848	0.000627839	0.00405977	XP_022855828.1	beta-D-xylosidase_2,_transcript_variant_X5	Olive
LOC111409055	0.613092	1.52953	6.45965e-05	0.00054639	XP_022894722.1	beta-D-xylosidase_6	Olive
LOC111409003	0.584221	1.49923	0.000134872	0.00104634	XP_022894659.1	beta-D-xylosidase_6,_transcript_variant_X2	Olive
LOC111397416	0.926474	1.90063	1.35368e-09	2.54761e-08	XP_022880096.1	beta-D-xylosidase_7	Olive
LOC111367036	0.842214	1.7928	9.10269e-05	0.000741241	XP_022843486.1	beta-galactosidase_10	Olive
LOC111367688	0.779564	1.71661	0.000185593	0.00138797	XP_022844453.1	beta-galactosidase_17,_transcript_variant_X3	Olive
LOC111401305	1.32675	2.50838	6.26412e-05	0.00053226	XP_022884756.1	beta-galactosidase_5-like	Olive
LOC111405238	0.725444	1.65341	3.33633e-07	4.39844e-06	XP_022889809.1	beta-glucosidase_44-like	Olive
LOC111395997	0.498863	1.4131	0.000100005	0.000804701	XP_022878014.1	beta-glucosidase_46-like,_transcript_variant_X2	Olive
LOC111369698	0.607688	1.52381	0.00146902	0.008499	XP_022847074.1	beta-glucosidase_BoGH3B-like	Olive
LOC111388762	0.586236	1.50132	0.00555147	0.0260618	XP_022869326.1	beta-glucosidase_BoGH3B-like,_transcript_variant_X2	Olive
LOC111391295	0.883712	1.84512	6.89472e-07	8.65856e-06	XP_022872244.1	beta-glucosidase_BoGH3B-like,_transcript_variant_X5	Olive
LOC111403814	1.17693	2.26095	6.25853e-07	7.90686e-06	XP_022888202.1	beta-glucosidase-like	Olive
LOC111370415	0.676462	1.59822	0.000243967	0.00176638	XP_022847873.1	callose_synthase_12-like	Olive
LOC111369905	0.948721	1.93016	0.00170515	0.00964769	XP_022847385.1	callose_synthase_3-like,_transcript_variant_X2	Olive
LOC111373395	0.454881	1.37067	0.00245111	0.0130722	XP_022851690.1	cellulose_synthase_A_catalytic_subunit_1_[UDP-forming]	Olive
LOC111385363	0.736365	1.66597	0.011091	0.0458629	XP_022865514.1	cellulose_synthase_A_catalytic_subunit_1_[UDP-forming]-like	Olive
LOC111393442	1.84299	3.58753	1.89744e-13	5.59272e-12	XP_022874743.1	cellulose_synthase_A_catalytic_subunit_4_[UDP-forming]-like	Olive
LOC111407758	1.84112	3.58288	3.67529e-09	6.48838e-08	XP_022893186.1	cellulose_synthase_A_catalytic_subunit_4_[UDP-forming]-like	Olive
LOC111403788	1.65245	3.14366	0.00445622	0.0217198	XP_022888179.1	cellulose_synthase_A_catalytic_subunit_7_[UDP-forming],_transcript_variant_X2	Olive
LOC111412157	1.88084	3.68289	0.000693435	0.00442606	XP_022898714.1	cellulose_synthase_A_catalytic_subunit_8_[UDP-forming]	Olive
LOC111382923	0.438795	1.35547	0.00633769	0.02909	XP_022862730.1	cellulose_synthase-like_protein_D2,_transcript_variant_X8	Olive
LOC111405683	0.513586	1.42759	0.000482758	0.00322905	XP_022890451.1	cellulose_synthase-like_protein_D3	Olive
LOC111407419	0.396331	1.31616	0.00334344	0.0169931	XP_022892644.1	cellulose_synthase-like_protein_D3,_transcript_variant_X4	Olive
LOC111396367	0.408931	1.3277	0.00538269	0.0253905	XP_022878564.1	cellulose_synthase-like_protein_D3,_transcript_variant_X5	Olive
LOC111405688	0.736749	1.66642	0.000323409	0.00226973	XP_022890453.1	cellulose_synthase-like_protein_D4	Olive
LOC111394168	0.521784	1.43573	4.76776e-05	0.000418218	XP_022875706.1	cellulose_synthase-like_protein_D5	Olive
LOC111371734	1.3401	2.53169	1.50963e-10	3.20319e-09	XP_022849638.1	cellulose_synthase-like_protein_G3	Olive
LOC111409919	0.458444	1.37406	0.00180196	0.0101003	XP_022895797.1	chitinase_domain-containing_protein_1	Olive
LOC111382278	0.765546	1.70001	2.49283e-08	3.89393e-07	XP_022861962.1	chitinase-like_protein_1	Olive
LOC111392080	0.995692	1.99404	4.12707e-10	8.31621e-09	XP_022873127.1	chitinase-like_protein_1,_transcript_variant_X5	Olive
LOC111400351	1.24087	2.3634	0.00012863	0.00100294	XP_022883534.1	classical_arabinogalactan_protein_10-like	Olive
LOC111412409	0.768623	1.70364	0.00402943	0.0199402	XP_022899100.1	classical_arabinogalactan_protein_26-like	Olive
LOC111374055	0.624439	1.54161	0.0111197	0.0459589	XP_022852445.1	classical_arabinogalactan_protein_26-like	Olive
LOC111368158	0.59194	1.50727	0.00488988	0.0234629	XP_022845161.1	classical_arabinogalactan_protein_4-like	Olive
LOC111394514	0.661638	1.58188	0.0107717	0.044829	XP_022876141.1	classical_arabinogalactan_protein_5-like	Olive
LOC111375830	1.63045	3.09609	9.69027e-36	1.35789e-33	XP_022854510.1	classical_arabinogalactan_protein_9-like	Olive
LOC111382147	1.33129	2.51627	2.12918e-13	6.24294e-12	XP_022861798.1	endo-1,31,4-beta-D-glucanase-like,_transcript_variant_X2	Olive
LOC111401132	0.942784	1.92223	0.000125461	0.000981477	XP_022884483.1	endo-1,4-beta-xylanase_C,_transcript_variant_X2	Olive
LOC111401285	0.876547	1.83598	9.61205e-10	1.84722e-08	XP_022884728.1	endoglucanase_10-like	Olive
LOC111374207	0.797446	1.73802	0.000554989	0.00364547	XP_022852619.1	endoglucanase_11-like	Olive
LOC111402464	1.0608	2.08608	0.000837535	0.00521311	XP_022886556.1	endoglucanase_11-like,_transcript_variant_X2	Olive
LOC111375818	0.779105	1.71607	0.00106679	0.0064319		endoglucanase_17-like	Olive
LOC111379392	0.558886	1.47313	0.00127338	0.00749085	XP_022858517.1	endoglucanase_17-like	Olive
LOC111382362	0.42963	1.34689	0.00227581	0.0122873	XP_022862078.1	endoglucanase_25-like	Olive
LOC111375465	0.983677	1.9775	1.47765e-08	2.38117e-07	XP_022854059.1	endoglucanase_6-like	Olive
LOC111402885	0.950772	1.93291	5.04841e-05	0.000439397	XP_022886967.1	endoglucanase_6-like	Olive
LOC111393999	0.822635	1.76863	8.11266e-05	0.00067069	XP_022875559.1	endoglucanase_6-like	Olive
LOC111398562	1.37379	2.59151	4.87688e-06	5.27377e-05	XP_022881291.1	endoglucanase-like	Olive
LOC111392757	0.434456	1.3514	0.00998513	0.0420656	XP_022873921.1	exo-poly-alpha-D-galacturonosidase	Olive
LOC111386313	1.02984	2.04179	8.54032e-11	1.85812e-09		expansin-A1	Olive
LOC111367160	0.849834	1.80229	4.91496e-05	0.000429227	XP_022843661.1	expansin-A15-like	Olive
LOC111398900	1.35809	2.56346	4.1993e-15	1.42222e-13	XP_022881827.1	expansin-A1-like	Olive
LOC111393522	0.932424	1.90848	7.34316e-12	1.83339e-10	XP_022874855.1	expansin-A4-like	Olive
LOC111377547	0.904382	1.87174	2.67262e-06	3.02432e-05	XP_022856446.1	expansin-A4-like	Olive
LOC111375950	1.34354	2.53774	2.2027e-19	1.03462e-17	XP_022854643.1	expansin-A6-like	Olive
LOC111390026	0.776294	1.71273	1.37781e-06	1.63368e-05	XP_022870782.1	expansin-A6-like	Olive
LOC111388915	1.78176	3.43846	1.24634e-13	3.73246e-12	XP_022869508.1	expansin-A6-like,_transcript_variant_X3	Olive
LOC111393373	2.49917	5.65361	4.92117e-09	8.48303e-08	XP_022874649.1	expansin-A8-like	Olive
LOC111377292	7.36981	165.4	1.49537e-11	3.5935e-10	XP_022856136.1	expansin-B2	Olive
LOC111388612	1.19019	2.28183	8.15733e-09	1.36081e-07	XP_022869136.1	expansin-B3-like	Olive
LOC111412040	0.385518	1.30633	0.00751715	0.0334935	XP_022898545.1	expansin-B3-like	Olive
LOC111387895	0.509945	1.424	0.00201049	0.0110844	XP_022868270.1	extensin-like	Olive
LOC111372810	1.93215	3.81623	1.44961e-27	1.26958e-25	XP_022850983.1	fasciclin-like_arabinogalactan_protein_11	Olive
LOC111403161	1.49354	2.81579	3.50948e-08	5.35028e-07	XP_022887330.1	fasciclin-like_arabinogalactan_protein_11	Olive
LOC111380681	1.39118	2.62294	5.94096e-12	1.49216e-10	XP_022860078.1	fasciclin-like_arabinogalactan_protein_11	Olive
LOC111369396	0.946664	1.92741	6.26215e-05	0.000532227	XP_022846666.1	fasciclin-like_arabinogalactan_protein_11	Olive
LOC111369928	1.92118	3.78731	3.45481e-38	5.61298e-36	XP_022847429.1	fasciclin-like_arabinogalactan_protein_12	Olive
LOC111375170	0.70365	1.62862	1.21855e-05	0.000121858	XP_022853739.1	fasciclin-like_arabinogalactan_protein_15,_transcript_variant_X5	Olive
LOC111412283	0.497053	1.41133	0.00261895	0.0138422	XP_022898911.1	fasciclin-like_arabinogalactan_protein_17	Olive
LOC111378414	0.60212	1.51795	0.000737512	0.00466665	XP_022857376.1	fasciclin-like_arabinogalactan_protein_4	Olive
LOC111393236	0.585618	1.50068	0.00681114	0.0308797	XP_022874443.1	fasciclin-like_arabinogalactan_protein_4	Olive
LOC111412049	0.710244	1.63608	8.90779e-07	1.09575e-05	XP_022898554.1	fasciclin-like_arabinogalactan_protein_7,_transcript_variant_X2	Olive
LOC111391531	0.953456	1.93651	2.60504e-06	2.95381e-05	XP_022872533.1	fasciclin-like_arabinogalactan_protein_7,_transcript_variant_X3	Olive
LOC111410815	0.502084	1.41626	0.00964612	0.0409194	XP_022897140.1	fasciclin-like_arabinogalactan_protein_8	Olive
LOC111378616	0.819177	1.7644	5.16659e-05	0.000448638	XP_022857614.1	galactinol--sucrose_galactosyltransferase_1	Olive
LOC111383507	0.734648	1.66399	2.60104e-06	2.95027e-05	XP_022863390.1	galactinol--sucrose_galactosyltransferase_6	Olive
LOC111390696	1.19573	2.2906	2.11297e-11	4.98675e-10	XP_022871544.1	galactinol--sucrose_galactosyltransferase_6,_transcript_variant_X4	Olive
LOC111380816	1.19803	2.29426	6.71694e-11	1.48421e-09	XP_022860239.1	glucan_endo-1,3-beta-D-glucosidase-like	Olive
LOC111370904	0.999608	1.99946	0.0117049	0.0479299	XP_022848569.1	glucan_endo-1,3-beta-D-glucosidase-like	Olive
LOC111387578	0.558656	1.4729	7.96062e-05	0.000659418	XP_022867920.1	glucan_endo-1,3-beta-glucosidase_11-like,_transcript_variant_X3	Olive
LOC111372286	0.527509	1.44144	0.000695763	0.00443755	XP_022850312.1	glucan_endo-1,3-beta-glucosidase_12-like	Olive
LOC111376511	4.12769	17.4807	6.43512e-85	7.21398e-82	XP_022855243.1	glucan_endo-1,3-beta-glucosidase_13-like	Olive
LOC111402073	0.652649	1.57205	0.000144207	0.00111056	XP_022885888.1	glucan_endo-1,3-beta-glucosidase_13-like	Olive
LOC111368800	0.508255	1.42233	0.00110875	0.00664912	XP_022846026.1	glucan_endo-1,3-beta-glucosidase_14-like	Olive
LOC111389590	0.529563	1.44349	0.00427952	0.0210109	XP_022870285.1	glucan_endo-1,3-beta-glucosidase_1-like,_transcript_variant_X2	Olive
LOC111412507	2.122	4.35298	1.07724e-10	2.31937e-09	XP_022899216.1	glucan_endo-1,3-beta-glucosidase_3-like	Olive
LOC111411772	1.35899	2.56505	2.98939e-13	8.59284e-12	XP_022898140.1	glucan_endo-1,3-beta-glucosidase_3-like,_transcript_variant_X2	Olive
LOC111407353	0.726626	1.65476	0.00111843	0.00669592		glucan_endo-1,3-beta-glucosidase_4-like	Olive
LOC111380127	0.765215	1.69962	6.58534e-08	9.64178e-07	XP_022859370.1	glucan_endo-1,3-beta-glucosidase_4-like,_transcript_variant_X3	Olive
LOC111396902	0.843282	1.79413	0.00422018	0.0207772	XP_022879272.1	glucan_endo-1,3-beta-glucosidase_5	Olive
LOC111399482	0.707061	1.63247	0.000106397	0.000850747	XP_022882595.1	glucan_endo-1,3-beta-glucosidase_8-like	Olive
LOC111369732	0.67726	1.5991	0.00873528	0.0378091	XP_022847133.1	glucan_endo-1,3-beta-glucosidase_9	Olive
LOC111374368	1.03027	2.0424	1.1607e-10	2.48793e-09	XP_022852798.1	glucuronoxylan_4-O-methyltransferase_1-like	Olive
LOC111394375	1.43513	2.70406	0.000125408	0.000981292	XP_022875926.1	glycine-rich_cell_wall_structural_protein_1.8-like	Olive
LOC111379058	1.47247	2.77497	9.61197e-07	1.17293e-05	XP_022858152.1	glycine-rich_cell_wall_structural_protein-like	Olive
LOC111405057	1.52977	2.88739	2.10461e-05	0.000199606	XP_022889513.1	laccase-12-like	Olive
LOC111405056	1.46086	2.75272	1.15344e-05	0.000115795	XP_022889512.1	laccase-12-like	Olive
LOC111408780	0.528773	1.4427	0.00390981	0.0194369	XP_022894320.1	laccase-14-like	Olive
LOC111374465	1.94773	3.85766	2.88441e-13	8.31953e-12	XP_022852901.1	laccase-17-like	Olive
LOC111399734	2.51868	5.73056	1.23234e-05	0.000123055	XP_022882972.1	laccase-17-like,_transcript_variant_X2	Olive
LOC111405985	1.59019	3.0109	4.48729e-12	1.13896e-10	XP_022890904.1	laccase-22-like	Olive
LOC111369383	2.53831	5.80908	4.68202e-15	1.57935e-13	XP_022846645.1	laccase-2-like	Olive
LOC111379927	2.78999	6.91624	1.26938e-05	0.000126341	XP_022859140.1	laccase-4-like	Olive
LOC111407973	1.97111	3.9207	5.11979e-12	1.29559e-10	XP_022893474.1	laccase-4-like	Olive
LOC111399330	1.60789	3.04806	1.12679e-15	4.01006e-14	XP_022882354.1	laccase-4-like	Olive
LOC111372675	1.36787	2.58089	1.66849e-07	2.29783e-06	XP_022850822.1	leucine-rich_repeat_extensin-like_protein_1	Olive
LOC111400943	0.619489	1.53633	0.00339617	0.0172169	XP_022884188.1	leucine-rich_repeat_extensin-like_protein_3	Olive
LOC111411363	0.583052	1.49801	6.49238e-05	0.00054902	XP_022897674.1	leucine-rich_repeat_extensin-like_protein_4	Olive
LOC111366083	1.54792	2.92396	9.6594e-05	0.000780902		LOW_QUALITY_PROTEIN:_leucine-rich_repeat_extensin-like_protein_2	Olive
LOC111376077	0.689992	1.61327	0.000478221	0.00320253	XP_022854773.1	lysine-rich_arabinogalactan_protein_18-like	Olive
LOC111396250	1.67558	3.19448	1.47753e-17	6.0451e-16	XP_022878391.1	lysine-rich_arabinogalactan_protein_19	Olive
LOC111382701	0.732487	1.6615	1.46983e-05	0.000144158	XP_022862509.1	mannan_endo-1,4-beta-mannosidase_2-like,_transcript_variant_X2	Olive
LOC111392942	0.96937	1.95799	0.000268819	0.00192847	XP_022874124.1	mannan_endo-1,4-beta-mannosidase_6-like,_transcript_variant_X3	Olive
LOC111405947	0.507905	1.42198	0.00570838	0.0266711	XP_022890847.1	PAN_domain-containing_protein_At5g03700,_transcript_variant_X7	Olive
LOC111372210	1.12773	2.18514	1.8506e-11	4.38911e-10	XP_022850203.1	pectate_lyase_12	Olive
LOC111366163	0.952721	1.93552	1.8374e-06	2.13597e-05	XP_022842626.1	pectate_lyase_13	Olive
LOC111405437	0.596414	1.51195	0.000110758	0.000881713	XP_022890084.1	pectate_lyase_13,_transcript_variant_X2	Olive
LOC111399605	1.13793	2.20065	0.000474329	0.00318026	XP_022882781.1	pectate_lyase_18	Olive
LOC111405311	1.01268	2.01766	1.001e-11	2.45728e-10	XP_022889906.1	pectate_lyase_18	Olive
LOC111380601	1.33964	2.53089	8.67709e-25	6.18835e-23	XP_022859982.1	pectate_lyase_5	Olive
LOC111380011	1.41308	2.66306	2.22232e-21	1.20742e-19	XP_022859240.1	pectate_lyase_8	Olive
LOC111412509	1.41409	2.66492	0.00756161	0.0336337		pectin_acetylesterase_12-like	Olive
LOC111386790	0.643736	1.56237	1.56113e-05	0.000152269	XP_022867034.1	pectinesterase/pectinesterase_inhibitor_34	Olive
LOC111387527	0.676705	1.59848	0.00359244	0.0180822	XP_022867865.1	pectinesterase/pectinesterase_inhibitor_51	Olive
LOC111411811	3.4723	11.0986	4.96976e-63	2.25862e-60	XP_022898195.1	pectinesterase/pectinesterase_inhibitor_PPE8B-like	Olive
LOC111366821	1.79815	3.47774	3.88089e-06	4.27368e-05	XP_022843285.1	pectinesterase/pectinesterase_inhibitor_U1-like	Olive
LOC111401482	1.68309	3.21114	7.83749e-07	9.74787e-06	XP_022884988.1	pectinesterase_1-like,_transcript_variant_X2	Olive
LOC111401483	1.0352	2.0494	0.0030382	0.0156522	XP_022884991.1	pectinesterase_1-like,_transcript_variant_X2	Olive
LOC111402506	1.17288	2.25462	1.53218e-18	6.72699e-17	XP_022886639.1	pectinesterase_2.1-like	Olive
LOC111405716	2.11477	4.33122	7.83681e-10	1.52611e-08	XP_022890493.1	pectinesterase_53	Olive
LOC111399422	0.774979	1.71116	0.000584725	0.00381843	XP_022882497.1	pectinesterase_53	Olive
LOC111385928	1.30599	2.47253	7.03841e-22	4.00522e-20	XP_022866118.1	pectinesterase_68	Olive
LOC111402656	3.07744	8.44117	2.3259e-11	5.46245e-10	XP_022886794.1	pectinesterase_inhibitor	Olive
LOC111411895	1.36034	2.56745	2.08132e-14	6.67271e-13	XP_022898323.1	pectinesterase_inhibitor_3-like	Olive
LOC111405004	1.22609	2.33933	1.86791e-06	2.1677e-05	XP_022889489.1	pectinesterase_inhibitor_3-like	Olive
LOC111381167	1.1847	2.27316	6.51536e-10	1.28742e-08	XP_022860678.1	pectinesterase_inhibitor_7-like	Olive
LOC111377531	1.45454	2.74069	2.61907e-28	2.41983e-26	XP_022856426.1	pectinesterase_inhibitor_9-like	Olive
LOC111375956	3.12504	8.72432	2.18518e-12	5.76843e-11	XP_022854648.1	pectinesterase-like	Olive
LOC111405079	0.802066	1.7436	3.81346e-11	8.69495e-10	XP_022889551.1	pectinesterase-like	Olive
LOC111403367	0.727735	1.65604	3.70766e-09	6.5421e-08	XP_022887658.1	pectinesterase-like	Olive
LOC111402356	0.679796	1.60191	0.00113285	0.0067647	XP_022886357.1	PLASMODESMATA_CALLOSE-BINDING_PROTEIN_2-like	Olive
LOC111367089	0.645673	1.56447	0.000178152	0.00133738	XP_022843567.1	PLASMODESMATA_CALLOSE-BINDING_PROTEIN_2-like	Olive
LOC111376634	0.900787	1.86708	1.10132e-05	0.00011096	XP_022855372.1	PLASMODESMATA_CALLOSE-BINDING_PROTEIN_2-like,_transcript_variant_X2	Olive
LOC111390740	0.729605	1.65818	5.38964e-06	5.76416e-05	XP_022871606.1	PLASMODESMATA_CALLOSE-BINDING_PROTEIN_3-like	Olive
LOC111367090	0.50123	1.41542	0.00396399	0.0196772	XP_022843568.1	PLASMODESMATA_CALLOSE-BINDING_PROTEIN_3-like	Olive
LOC111402355	0.595309	1.5108	0.00751961	0.033498	XP_022886355.1	PLASMODESMATA_CALLOSE-BINDING_PROTEIN_4-like	Olive
LOC111372095	0.66241	1.58272	0.00427359	0.0209879	XP_022850033.1	PLASMODESMATA_CALLOSE-BINDING_PROTEIN_5-like	Olive
LOC111371497	1.08661	2.12374	0.00128836	0.00756573	XP_022849295.1	pollen-specific_leucine-rich_repeat_extensin-like_protein_3	Olive
LOC111381541	2.87156	7.31857	2.49005e-21	1.33989e-19	XP_022861098.1	polygalacturonase	Olive
LOC111411713	1.22261	2.33369	3.44722e-11	7.90815e-10	XP_022898049.1	polygalacturonase	Olive
LOC111404295	1.04735	2.06672	1.38264e-05	0.000136523	XP_022888892.1	polygalacturonase	Olive
LOC111374309	0.650338	1.56954	1.81328e-06	2.11231e-05	XP_022852732.1	polygalacturonase	Olive
LOC111376000	0.613033	1.52947	2.07898e-05	0.000197453	XP_022854697.1	polygalacturonase	Olive
LOC111376001	0.549334	1.46341	0.00124282	0.0073367	XP_022854698.1	polygalacturonase	Olive
LOC111402879	0.442682	1.35913	0.00355436	0.0179188	XP_022886963.1	polygalacturonase,_transcript_variant_X4	Olive
LOC111398878	2.93064	7.6245	2.66415e-13	7.71732e-12	XP_022881791.1	polygalacturonase_At1g48100-like	Olive
LOC111396173	2.13286	4.38585	9.53409e-31	1.01149e-28	XP_022878277.1	polygalacturonase_At1g48100-like	Olive
LOC111365504	1.54443	2.91689	5.85365e-20	2.87393e-18	XP_022841827.1	polygalacturonase_At1g48100-like	Olive
LOC111382430	1.45054	2.73309	4.63437e-16	1.68861e-14	XP_022862172.1	polygalacturonase_At1g48100-like	Olive
LOC111402200	1.79096	3.46045	1.39019e-10	2.9572e-09	XP_022886135.1	polygalacturonase_At1g48100-like,_transcript_variant_X2	Olive
LOC111409250	1.59606	3.02316	0.00503915	0.0240624	XP_022895034.1	polygalacturonase_At1g80170	Olive
LOC111373356	0.61571	1.53231	5.78268e-05	0.000495736	XP_022851645.1	polygalacturonase-1_non-catalytic_subunit_beta-like	Olive
LOC111396179	0.559678	1.47394	9.0892e-06	9.31379e-05	XP_022878287.1	polygalacturonase-1_non-catalytic_subunit_beta-like	Olive
LOC111394814	0.560674	1.47496	0.000244882	0.00177263	XP_022876595.1	protein_CELLULOSE_SYNTHASE_INTERACTIVE_1,_transcript_variant_X3	Olive
LOC111376701	0.740088	1.67028	0.00240241	0.0128451	XP_022855441.1	protein_CELLULOSE_SYNTHASE_INTERACTIVE_1-like	Olive
LOC111366806	0.501496	1.41568	0.00612402	0.0282559	XP_022843270.1	protein_CELLULOSE_SYNTHASE_INTERACTIVE_1-like	Olive
LOC111385589	0.648591	1.56764	7.65694e-06	7.96753e-05	XP_022865765.1	protein_CELLULOSE_SYNTHASE_INTERACTIVE_3-like	Olive
LOC111398419	0.490534	1.40496	0.00330041	0.0167972	XP_022881088.1	protein_PECTIC_ARABINOGALACTAN_SYNTHESIS-RELATED-like	Olive
LOC111382027	1.41358	2.66397	2.80004e-05	0.000259202	XP_022861654.1	protein_REDUCED_WALL_ACETYLATION_1-like	Olive
LOC111408284	1.35354	2.55538	1.76201e-07	2.41772e-06	XP_022893828.1	protein_REDUCED_WALL_ACETYLATION_3-like	Olive
LOC111412215	0.488419	1.40291	0.00537818	0.0253751	XP_022898812.1	protein_REDUCED_WALL_ACETYLATION_3-like,_transcript_variant_X2	Olive
LOC111397120	1.00507	2.00704	0.00145748	0.00844528	XP_022879635.1	protein_REDUCED_WALL_ACETYLATION_3-like,_transcript_variant_X3	Olive
LOC111367487	1.30608	2.47269	2.82042e-11	6.55519e-10	XP_022844160.1	rhamnogalacturonate_lyase_B	Olive
LOC111396809	0.437921	1.35465	0.00902696	0.0387919	XP_022879100.1	rhamnogalacturonate_lyase_B,_transcript_variant_X2	Olive
LOC111377440	0.955974	1.93989	6.33142e-09	1.07487e-07	XP_022856300.1	vegetative_cell_wall_protein_gp1-like	Olive
LOC111367188	0.733098	1.6622	9.32181e-08	1.3409e-06	XP_022843702.1	vegetative_cell_wall_protein_gp1-like	Olive
LOC111411458	0.632385	1.55013	0.00050987	0.00337947	XP_022897756.1	vegetative_cell_wall_protein_gp1-like	Olive
LOC111405254	0.487424	1.40194	0.0058912	0.0273505	XP_022889826.1	xyloglucan_6-xylosyltransferase_5	Olive
LOC111384445	1.39884	2.6369	1.44331e-09	2.69816e-08	XP_022864490.1	xyloglucan_endotransglucosylase/hydrolase_2-like	Olive
LOC111382429	0.774998	1.71119	1.2389e-06	1.4854e-05	XP_022862171.1	xyloglucan_endotransglucosylase/hydrolase_protein_31-like	Olive
LOC111372204	1.13441	2.19528	1.94067e-05	0.00018547	XP_022850198.1	xyloglucan_endotransglucosylase/hydrolase_protein_32	Olive
LOC111373347	1.52867	2.8852	4.82644e-05	0.000422703	XP_022851630.1	xyloglucan_endotransglucosylase/hydrolase_protein_33	Olive
LOC111380051	0.554209	1.46836	0.00020076	0.00148684	XP_022859281.1	xyloglucan_endotransglucosylase/hydrolase_protein_B	Olive

## Sheet: P28 vs. P14_DOWN
P28 vs. P14_DOWN
Genes	log2FoldChange	FoldChange	pvalue	padj	Gene_ID	description	Organism
LOC111385780	-0.652927	-1.57235	8.10947e-06	8.39168e-05	XP_022865962.1	acid_beta-fructofuranosidase-like	Olive
LOC111391839	-0.862481	-1.81816	3.68503e-05	0.000331456	XP_022872881.1	acidic_endochitinase-like	Olive
LOC111367962	-0.83677	-1.78605	0.00106941	0.00644363	XP_022844872.1	aldose_1-epimerase-like	Olive
LOC111400875	-0.927796	-1.90237	7.75066e-07	9.64702e-06	XP_022884086.1	aldose_1-epimerase-like	Olive
LOC111373614	-2.89394	-7.43298	6.00125e-23	3.68973e-21	XP_022851936.1	alpha-galactosidase_3-like	Olive
LOC111386601	-0.889068	-1.85198	9.17173e-06	9.38979e-05	XP_022867041.1	alpha-galactosidase_3-like,_transcript_variant_X4	Olive
LOC111401756	-1.80626	-3.49734	9.11181e-07	1.11737e-05	XP_022885408.1	alpha-galactosidase-like	Olive
LOC111387342	-1.20559	-2.30632	0.000463574	0.00311809	XP_022867664.1	alpha-glucosidase_2-like	Olive
LOC111387365	-1.31134	-2.48171	0.00226383	0.0122305	XP_022867690.1	alpha-glucosidase_2-like	Olive
LOC111387363	-1.64627	-3.13023	7.05113e-05	0.000591953	XP_022867688.1	alpha-glucosidase_2-like	Olive
LOC111408324	-0.608038	-1.52418	0.000122127	0.00096031	XP_022893862.1	alpha-glucosidase-like	Olive
LOC111403475	-3.24238	-9.46356	0.00112854	0.00674255	XP_022887760.1	basic_endochitinase-like	Olive
LOC111371327	-4.16168	-17.8974	2.31826e-140	2.59884e-136	XP_022849015.1	beta-D-xylosidase_1-like	Olive
LOC111404715	-0.901407	-1.86789	0.000437611	0.0029648	XP_022889250.1	beta-fructofuranosidase,_insoluble_isoenzyme_1-like	Olive
LOC111405108	-3.45146	-10.9394	3.47327e-33	4.23223e-31	XP_022889601.1	beta-fructofuranosidase,_insoluble_isoenzyme_1-like	Olive
LOC111374877	-3.12685	-8.73525	1.24891e-28	1.17984e-26	XP_022853404.1	beta-galactosidase_13-like	Olive
LOC111385282	-3.73796	-13.3426	1.10831e-10	2.3817e-09		beta-galactosidase_14-like	Olive
LOC111405100	-0.979864	-1.97228	2.55176e-05	0.000238119	XP_022889588.1	beta-galactosidase-like	Olive
LOC111387481	-2.53331	-5.78899	0.000907422	0.00558674	XP_022867803.1	beta-galactosidase-like	Olive
LOC111369847	-1.97612	-3.93433	8.58772e-05	0.000704423	XP_022847306.1	beta-glucosidase_10-like,_transcript_variant_X5	Olive
LOC111375992	-0.531435	-1.44537	0.00349798	0.0176599	XP_022854687.1	beta-glucosidase_11-like	Olive
LOC111407846	-1.52697	-2.88181	4.33704e-05	0.000384649	XP_022893300.1	beta-glucosidase_24-like	Olive
LOC111386633	-1.00302	-2.00418	5.19078e-07	6.63516e-06	XP_022866868.1	beta-glucosidase_46-like	Olive
LOC111378802	-0.849706	-1.80213	1.17973e-07	1.66914e-06	XP_022857824.1	beta-glucosidase_BoGH3B-like	Olive
LOC111398515	-0.416934	-1.33509	0.00572121	0.0267199	XP_022881221.1	beta-glucosidase_BoGH3B-like,_transcript_variant_X2	Olive
LOC111404347	-1.34913	-2.54759	4.07669e-08	6.14812e-07	XP_022888932.1	beta-glucosidase-like	Olive
LOC111407832	-2.1242	-4.3596	2.48339e-09	4.49994e-08	XP_022893289.1	beta-glucosidase-like	Olive
LOC111381384	-4.87363	-29.3163	7.66612e-121	2.57819e-117	XP_022860931.1	beta-glucosidase-like	Olive
LOC111378046	-0.87618	-1.83551	8.70086e-07	1.07383e-05	XP_022856975.1	beta-glucosidase-like,_transcript_variant_X2	Olive
LOC111407831	-3.32704	-10.0355	3.9728e-10	8.01976e-09	XP_022893288.1	beta-glucosidase-like,_transcript_variant_X2	Olive
LOC111407829	-1.73629	-3.33178	8.26793e-07	1.0234e-05	XP_022893286.1	beta-glucosidase-like,_transcript_variant_X3	Olive
LOC111403992	-3.61645	-12.2648	2.12673e-18	9.2648e-17	XP_022888458.1	beta-glucosidase-like,_transcript_variant_X4	Olive
LOC111408286	-0.52501	-1.43894	0.00230294	0.0124119	XP_022893830.1	beta-xylosidase/alpha-L-arabinofuranosidase_2-like	Olive
LOC111375496	-1.15981	-2.23428	9.79461e-20	4.68567e-18	XP_022854104.1	beta-xylosidase/alpha-L-arabinofuranosidase_2-like,_transcript_variant_X2	Olive
LOC111410420	-0.761032	-1.6947	0.00183798	0.0102713	XP_022896504.1	callose_synthase_1-like,_transcript_variant_X3	Olive
LOC111397057	-1.62086	-3.07557	4.88242e-07	6.25765e-06	XP_022879526.1	callose_synthase_5-like	Olive
LOC111412599	-3.6271	-12.3557	3.49878e-64	1.78284e-61	XP_022899305.1	cell_wall_protein	Olive
LOC111389517	-1.32486	-2.50508	2.79789e-08	4.32823e-07	XP_022870216.1	cellulose_synthase-like_protein_E1	Olive
LOC111376857	-1.72237	-3.29977	7.58052e-24	5.05834e-22	XP_022855631.1	cellulose_synthase-like_protein_E6	Olive
LOC111378473	-0.499423	-1.41365	0.000427771	0.00290692	XP_022857450.1	cellulose_synthase-like_protein_G2	Olive
LOC111384168	-0.876385	-1.83577	0.000152931	0.00116838	XP_022864188.1	cellulose_synthase-like_protein_G2	Olive
LOC111393343	-0.795497	-1.73568	0.00104068	0.00630503	XP_022874611.1	cellulose_synthase-like_protein_G2,_transcript_variant_X3	Olive
LOC111369641	-1.76621	-3.40159	1.67649e-10	3.53271e-09	XP_022847003.1	chitinase_2-like	Olive
LOC111400814	-2.99823	-7.99021	3.1803e-05	0.000291039	XP_022883991.1	classical_arabinogalactan_protein_11-like	Olive
LOC111390511	-0.879245	-1.83941	5.48313e-05	0.000473153	XP_022871328.1	classical_arabinogalactan_protein_4-like	Olive
LOC111397532	-0.530674	-1.4446	0.000238791	0.00173413	XP_022880284.1	cytosolic_endo-beta-N-acetylglucosaminidase_1	Olive
LOC111374555	-0.756509	-1.6894	0.000643568	0.00415028		endo-1,3(4)-beta-glucanase_ARB_01444	Olive
LOC111398668	-1.04313	-2.0607	0.00311929	0.016016	XP_022881457.1	endochitinase_A-like	Olive
LOC111393512	-1.15572	-2.22795	8.65431e-07	1.06878e-05	XP_022874844.1	endochitinase_EP3-like	Olive
LOC111393511	-5.11034	-34.5436	1.23578e-24	8.65842e-23	XP_022874843.1	endochitinase_EP3-like	Olive
LOC111399239	-3.16826	-8.9896	2.56529e-46	6.43831e-44	XP_022882271.1	endoglucanase_16	Olive
LOC111387565	-1.55435	-2.93702	4.24577e-09	7.41379e-08	XP_022867905.1	endoglucanase_1-like	Olive
LOC111371180	-4.93393	-30.5675	2.1231e-23	1.36264e-21	XP_022848852.1	endoglucanase-like	Olive
LOC111385774	-5.02951	-32.6612	8.41157e-22	4.7227e-20	XP_022865957.1	endoglucanase-like	Olive
LOC111389258	-2.80907	-7.00831	2.24621e-08	3.52836e-07	XP_022869931.1	exopolygalacturonase-like	Olive
LOC111388343	-2.8361	-7.14085	3.01807e-31	3.3279e-29	XP_022868791.1	exopolygalacturonase-like	Olive
LOC111381744	-3.05087	-8.28714	1.64355e-14	5.30972e-13	XP_022861327.1	exopolygalacturonase-like	Olive
LOC111391534	-3.05994	-8.33935	1.4253e-39	2.49658e-37	XP_022872535.1	exopolygalacturonase-like	Olive
LOC111404918	-3.23384	-9.40769	9.69738e-47	2.45213e-44	XP_022889410.1	exopolygalacturonase-like	Olive
LOC111389264	-3.19309	-9.1457	2.10583e-42	4.37168e-40	XP_022869947.1	exopolygalacturonase-like,_transcript_variant_X4	Olive
LOC111381068	-2.69032	-6.45455	2.31638e-18	1.00389e-16	XP_022860549.1	expansin-A11-like,_transcript_variant_X2	Olive
LOC111397188	-0.750126	-1.68194	0.000189427	0.00141444	XP_022879735.1	expansin-A8-like	Olive
LOC111412123	-0.648491	-1.56753	0.00161945	0.00922489	XP_022898668.1	expansin-like_A2	Olive
LOC111407501	-0.739289	-1.66935	0.0106897	0.0445649	XP_022892783.1	expansin-like_B1	Olive
LOC111374382	-2.35006	-5.09847	0.00221439	0.0119947	XP_022852815.1	extensin-2-like,_transcript_variant_X2	Olive
LOC111393866	-4.71149	-26.1998	1.87974e-86	2.34139e-83	XP_022875386.1	extensin-2-like,_transcript_variant_X3	Olive
LOC111393113	-4.79333	-27.729	3.48178e-18	1.48977e-16	XP_022874278.1	extensin-3-like	Olive
LOC111380600	-2.09654	-4.27682	2.10878e-23	1.35603e-21	XP_022859978.1	extensin-like	Olive
LOC111385698	-2.68544	-6.43278	3.7189e-12	9.54736e-11	XP_022865890.1	extensin-like	Olive
LOC111393647	-5.6887	-51.5785	6.544e-08	9.59032e-07	XP_022875060.1	extensin-like	Olive
LOC111382447	-2.99368	-7.96506	1.87715e-25	1.40916e-23	XP_022862193.1	fasciclin-like_arabinogalactan_protein_3	Olive
LOC111375031	-2.48953	-5.61596	1.53742e-09	2.86296e-08	XP_022853591.1	galactinol--sucrose_galactosyltransferase_2	Olive
LOC111365945	-1.43127	-2.69685	1.22023e-05	0.000121931	XP_022842288.1	galactinol--sucrose_galactosyltransferase_2,_transcript_variant_X2	Olive
LOC111403880	-2.32846	-5.02268	3.27987e-50	9.34792e-48	XP_022888283.1	galactinol--sucrose_galactosyltransferase_2,_transcript_variant_X2	Olive
LOC111392579	-0.815974	-1.76049	3.47261e-05	0.00031479	XP_022873704.1	galactinol--sucrose_galactosyltransferase_5	Olive
LOC111402259	-2.25284	-4.76619	1.68914e-21	9.22196e-20	XP_022886198.1	galactinol--sucrose_galactosyltransferase_6	Olive
LOC111412811	-2.7244	-6.60886	2.95308e-33	3.62464e-31	XP_022899478.1	glucan_endo-1,3-beta-D-glucosidase	Olive
LOC111378392	-4.96717	-31.28	2.58618e-183	8.69758e-179	XP_022857353.1	glucan_endo-1,3-beta-glucosidase,_acidic-like	Olive
LOC111378441	-4.97269	-31.4	3.52075e-70	2.27705e-67	XP_022857406.1	glucan_endo-1,3-beta-glucosidase,_acidic-like	Olive
LOC111386074	-5.07124	-33.6198	1.13322e-06	1.36992e-05	XP_022866268.1	glucan_endo-1,3-beta-glucosidase,_acidic-like	Olive
LOC111407975	-0.558025	-1.47225	0.000967973	0.00590493	XP_022893476.1	glucan_endo-1,3-beta-glucosidase_11-like,_transcript_variant_X4	Olive
LOC111376496	-0.846434	-1.79805	7.30777e-05	0.000611666	XP_022855226.1	glucan_endo-1,3-beta-glucosidase_12-like	Olive
LOC111400625	-1.29349	-2.45121	1.30602e-07	1.83241e-06	XP_022883795.1	glucan_endo-1,3-beta-glucosidase_14-like	Olive
LOC111385299	-1.75116	-3.3663	5.26004e-24	3.56654e-22		glucan_endo-1,3-beta-glucosidase_14-like	Olive
LOC111386598	-2.9417	-7.68317	9.64783e-17	3.74672e-15	XP_022866836.1	glucan_endo-1,3-beta-glucosidase_14-like	Olive
LOC111395746	-4.84339	-28.7081	9.41673e-09	1.55395e-07	XP_022877648.1	glucan_endo-1,3-beta-glucosidase_14-like	Olive
LOC111390995	-0.747659	-1.67907	0.00319893	0.0163475	XP_022871898.1	glucan_endo-1,3-beta-glucosidase_5	Olive
LOC111389059	-1.26709	-2.40676	8.23206e-05	0.000679707	XP_022869683.1	glucan_endo-1,3-beta-glucosidase_7-like	Olive
LOC111373003	-2.3824	-5.21404	4.41893e-16	1.61536e-14	XP_022851218.1	glucan_endo-1,3-beta-glucosidase_8-like	Olive
LOC111367648	-3.52462	-11.5084	1.57506e-23	1.0226e-21	XP_022844402.1	glucan_endo-1,3-beta-glucosidase_8-like	Olive
LOC111397456	-2.48676	-5.60516	8.51447e-12	2.11238e-10	XP_022880171.1	glucan_endo-1,3-beta-glucosidase-like	Olive
LOC111410888	-2.98403	-7.91191	2.87619e-36	4.15147e-34	XP_022897253.1	glucan_endo-1,3-beta-glucosidase-like	Olive
LOC111400639	-3.34759	-10.1795	3.97552e-11	9.03995e-10	XP_022883804.1	glycine-rich_cell_wall_structural_protein_1	Olive
LOC111371253	-3.69375	-12.9398	1.02361e-14	3.34549e-13	XP_022848908.1	laccase-12-like	Olive
LOC111397597	-4.79019	-27.6688	4.00718e-29	3.89495e-27	XP_022880370.1	laccase-12-like	Olive
LOC111380004	-1.97946	-3.94345	1.02437e-16	3.95984e-15	XP_022859235.1	laccase-12-like,_transcript_variant_X2	Olive
LOC111408786	-2.5636	-5.9118	1.87148e-06	2.17109e-05	XP_022894322.1	laccase-14-like	Olive
LOC111397819	-2.09988	-4.28674	0.000691831	0.0044175	XP_022880563.1	laccase-15-like	Olive
LOC111408785	-2.44154	-5.43222	1.58088e-62	6.64583e-60	XP_022894321.1	laccase-15-like	Olive
LOC111404076	-6.24582	-75.8892	6.49855e-41	1.23476e-38	XP_022888574.1	laccase-7-like	Olive
LOC111399045	-2.00889	-4.02474	3.82866e-07	5.00045e-06	XP_022882025.1	leucine-rich_repeat_extensin-like_protein_3	Olive
LOC111388883	-0.400958	-1.32038	0.00739209	0.033059	XP_022869478.1	mannan_endo-1,4-beta-mannosidase_2-like	Olive
LOC111399376	-0.606167	-1.52221	0.00276064	0.0144661	XP_022882416.1	monogalactosyldiacylglycerol_synthase_2,_chloroplastic-like	Olive
LOC111375537	-3.0078	-8.04334	8.3563e-28	7.37613e-26	XP_022854141.1	pectate_lyase_P59	Olive
LOC111400823	-3.10995	-8.6335	1.36917e-39	2.41082e-37	XP_022884005.1	pectate_lyase_P59	Olive
LOC111386622	-2.75768	-6.76308	3.68821e-15	1.25418e-13	XP_022866858.1	pectate_lyase-like	Olive
LOC111372517	-3.65742	-12.6181	2.79848e-15	9.70266e-14	XP_022850632.1	pectate_lyase-like	Olive
LOC111382253	-0.967218	-1.95507	7.85899e-06	8.15758e-05	XP_022861935.1	pectin_acetylesterase_12-like	Olive
LOC111391823	-1.65444	-3.148	2.07893e-08	3.2871e-07		pectin_acetylesterase_8-like	Olive
LOC111377576	-1.26822	-2.40864	0.00397108	0.0197037	XP_022856472.1	pectin_acetylesterase_9-like	Olive
LOC111381746	-3.10184	-8.58514	1.3217e-42	2.79561e-40	XP_022861329.1	pectinesterase	Olive
LOC111399065	-3.73572	-13.3218	5.01519e-29	4.83283e-27	XP_022882054.1	pectinesterase	Olive
LOC111404698	-1.80339	-3.4904	2.80508e-06	3.16464e-05	XP_022889233.1	pectinesterase/pectinesterase_inhibitor_12	Olive
LOC111386535	-1.41424	-2.66519	1.33506e-05	0.000132212	XP_022866762.1	pectinesterase/pectinesterase_inhibitor_22	Olive
LOC111379884	-3.5581	-11.7787	3.03524e-33	3.71193e-31	XP_022859094.1	pectinesterase/pectinesterase_inhibitor_28	Olive
LOC111402940	-0.758844	-1.69213	0.00258194	0.0136767	XP_022887039.1	pectinesterase/pectinesterase_inhibitor_34	Olive
LOC111403813	-3.59946	-12.1212	4.74825e-39	8.10601e-37	XP_022888201.1	pectinesterase/pectinesterase_inhibitor_45	Olive
LOC111403925	-2.88457	-7.38487	2.5791e-37	4.05317e-35	XP_022888359.1	pectinesterase_1	Olive
LOC111374325	-2.67474	-6.38523	2.02495e-47	5.19856e-45	XP_022852750.1	pectinesterase-like	Olive
LOC111408081	-2.70636	-6.52674	1.11698e-18	4.95581e-17	XP_022893622.1	pectinesterase-like	Olive
LOC111400083	-2.8314	-7.11764	5.47127e-16	1.98067e-14	XP_022883301.1	pectinesterase-like	Olive
LOC111371494	-3.02471	-8.13819	1.98026e-44	4.59296e-42	XP_022849290.1	pectinesterase-like	Olive
LOC111374323	-3.16618	-8.97666	5.65439e-44	1.28488e-41	XP_022852746.1	pectinesterase-like	Olive
LOC111373189	-3.33395	-10.0836	2.78872e-36	4.04257e-34	XP_022851456.1	pectinesterase-like	Olive
LOC111384818	-2.92102	-7.5738	3.10275e-15	1.06811e-13	XP_022864919.1	pollen-specific_leucine-rich_repeat_extensin-like_protein_1	Olive
LOC111384183	-2.98309	-7.9068	8.15313e-23	4.95837e-21		pollen-specific_leucine-rich_repeat_extensin-like_protein_4	Olive
LOC111382119	-4.347	-20.3506	1.29139e-22	7.74168e-21	XP_022861759.1	polygalacturonase_inhibitor-like	Olive
LOC111397788	-1.37972	-2.60218	2.03942e-10	4.23642e-09	XP_022880536.1	polygalacturonase-like	Olive
LOC111396326	-3.69044	-12.9102	0.00313333	0.0160611	XP_022878501.1	polygalacturonase-like	Olive
LOC111377599	-4.731	-26.5567	0.00261618	0.0138297	XP_022856498.1	polygalacturonase-like	Olive
LOC111402363	-2.29646	-4.9125	2.64677e-09	4.77797e-08	XP_022886369.1	protein_CELLULOSE_SYNTHASE_INTERACTIVE_3-like	Olive
LOC111408916	-2.63728	-6.22157	1.51633e-60	5.72984e-58	XP_022894531.1	protein_WALLS_ARE_THIN_1	Olive
LOC111381305	-1.40839	-2.6544	2.21927e-19	1.04095e-17		protein_WALLS_ARE_THIN_1-like	Olive
LOC111410408	-1.96151	-3.8947	4.50524e-22	2.58559e-20	XP_022896488.1	vegetative_cell_wall_protein_gp1-like	Olive
LOC111409294	-3.09013	-8.51573	1.72673e-28	1.60863e-26	XP_022895084.1	vegetative_cell_wall_protein_gp1-like	Olive
LOC111370995	-0.993401	-1.99087	0.000615687	0.00399502	XP_022848695.1	xyloglucan_endotransglucosylase/hydrolase_2-like	Olive
LOC111385517	-4.50852	-22.7614	9.90786e-58	3.5448e-55	XP_022865681.1	xyloglucan_endotransglucosylase/hydrolase_protein_23	Olive
LOC111383699	-3.36035	-10.2699	5.85995e-40	1.04273e-37	XP_022863600.1	xyloglucan_endotransglucosylase/hydrolase_protein_30	Olive
LOC111397229	-5.85605	-57.9226	4.49618e-16	1.64181e-14	XP_022879818.1	xyloglucan_endotransglucosylase/hydrolase_protein_7	Olive
LOC111408989	-8.09349	-273.14	1.81795e-57	6.36871e-55	XP_022894638.1	xyloglucan_endotransglucosylase/hydrolase_protein_7	Olive
LOC111384098	-1.72901	-3.31501	2.42321e-06	2.7663e-05	XP_022864103.1	xyloglucan_endotransglucosylase/hydrolase_protein_8	Olive
LOC111401652	-2.07523	-4.21411	2.26032e-29	2.22924e-27	XP_022885264.1	xyloglucan_endotransglucosylase/hydrolase_protein_B	Olive
