# Supplementary material for: Characterization of Transcriptome Dynamics during Early Fruit Development in Olive (Olea europaea L.)
Source: Int J Mol Sci. 2023 Jan 4;24(2):961. doi: 10.3390/ijms24020961 (PMC9864153; doi:10.3390/ijms24020961)
Supplement: Supplementary file 1 [file ijms-24-00961-s001.zip › Table S18_def.xlsx]

## Sheet: P14 vs. P0_UP
Supplementary Table S18. Transport-related genes repressed or induced in the dividing fruits at 14 (P14) versus the flowers at anthesis stage (P0), and the expanding fruits at 28 (P28) DPA versus the dividing fruits at 14 (P14) during early olive fruit development.
P14 vs. P0_UP
Genes	log2FoldChange	FoldChange	pvalue	padj	Gene_ID	description	Organism
LOC111395482	4.91225	30.1117	4.13e-61	1.3e-59	XP_022877272.1	potassium_transporter_12,_transcript_variant_X2	Olive
LOC111367974	4.48984	22.4686	7.31e-42	1.41e-40	XP_022844898.1	ammonium_transporter_1_member_3-like	Olive
LOC111409211	4.29785	19.669	7.15e-72	2.71e-70	XP_022894981.1	glucose-6-phosphate/phosphate_translocator_2,_chloroplastic-like	Olive
LOC111406266	3.98609	15.8465	8.61e-58	2.53e-56	XP_022891359.1	ABC_transporter_C_family_member_8	Olive
LOC111402972	3.81042	14.0297	2.82e-88	1.45e-86	XP_022887074.1	ABC_transporter_G_family_member_8-like	Olive
LOC111367434	3.80794	14.0057	1.87e-18	1.5e-17	XP_022844088.1	sodium/hydrogen_exchanger_2-like,_transcript_variant_X4	Olive
LOC111393813	3.71407	13.1234	2.68e-118	2.09e-116	XP_022875297.1	aquaporin_TIP1-2	Olive
LOC111367673	3.51822	11.4575	2.02e-45	4.35e-44	XP_022844434.1	ABC_transporter_G_family_member_5	Olive
LOC111393814	3.47475	11.1174	5.96e-109	4.07e-107	XP_022875299.1	aquaporin_TIP1-2	Olive
LOC111405283	3.42175	10.7164	3.26e-49	7.75e-48	XP_022889862.1	nucleobase-ascorbate_transporter_6-like,_transcript_variant_X3	Olive
LOC111392308	3.29194	9.7943	3.6e-16	2.57e-15		nucleobase-ascorbate_transporter_2-like	Olive
LOC111407798	3.2871	9.76145	6.57e-41	1.23e-39	XP_022893246.1	sodium/calcium_exchanger_NCL2-like	Olive
LOC111407798	3.2871	9.76145	6.57e-41	1.23e-39	XP_022893246.1	sodium/calcium_exchanger_NCL2-like	Olive
LOC111367970	3.11874	8.68627	3.03e-44	6.29e-43	XP_022844890.1	ABC_transporter_B_family_member_19	Olive
LOC111409533	3.10642	8.61243	2.57e-82	1.19e-80	XP_022895341.1	ABC_transporter_B_family_member_19-like	Olive
LOC111408751	2.95531	7.75598	4.28e-13	2.54e-12	XP_022894283.1	WAT1-related_protein_At1g43650	Olive
LOC111370077	2.95278	7.74237	1e-20	8.98e-20	XP_022847553.1	nucleobase-ascorbate_transporter_2-like	Olive
LOC111404758	2.82835	7.10262	8.01e-51	1.97e-49	XP_022889288.1	early_nodulin-like_protein_1	Olive
LOC111404758	2.82835	7.10262	8.01e-51	1.97e-49	XP_022889288.1	early_nodulin-like_protein_1	Olive
LOC111395551	2.78733	6.90351	1.63e-48	3.8e-47	XP_022877349.1	sodium/metabolite_cotransporter_BASS1,_chloroplastic,_transcript_variant_X2	Olive
LOC111380632	2.75676	6.75879	2.44e-91	1.3e-89	XP_022860020.1	aquaporin_AQPAn.G-like	Olive
LOC111398714	2.74006	6.68097	1.3e-88	6.66e-87	XP_022881533.1	ABC_transporter_G_family_member_32-like,_transcript_variant_X2	Olive
LOC111404751	2.65625	6.30394	4.48e-37	7.42e-36		ABC_transporter_B_family_member_1-like	Olive
LOC111378382	2.60248	6.0733	1.33e-29	1.74e-28	XP_022857344.1	pleiotropic_drug_resistance_protein_1-like,_transcript_variant_X2	Olive
LOC111397941	2.56203	5.90539	1.2e-104	7.66e-103	XP_022880672.1	ABC_transporter_B_family_member_19-like	Olive
LOC111374233	2.55842	5.89062	2.15e-17	1.64e-16	XP_022852652.1	lysine_histidine_transporter-like_8	Olive
LOC111368982	2.55025	5.85738	7.74e-15	5.13e-14	XP_022846250.1	amino_acid_transporter_AVT1A-like,_transcript_variant_X2	Olive
LOC111405493	2.45251	5.47369	4.08e-25	4.44e-24	XP_022890169.1	ABC_transporter_G_family_member_11-like,_transcript_variant_X3	Olive
LOC111373406	2.39189	5.24846	1.07e-57	3.13e-56	XP_022851718.1	ion_channel_POLLUX-like_2,_transcript_variant_X4	Olive
LOC111408443	2.36939	5.16722	9.6e-07	3.37e-06	XP_022894022.1	nucleobase-ascorbate_transporter_6,_transcript_variant_X2	Olive
LOC111377907	2.36155	5.13923	3.96e-29	5.09e-28	XP_022856828.1	hexose_carrier_protein_HEX6-like,_transcript_variant_X5	Olive
LOC111380085	2.35923	5.13096	3.78e-57	1.08e-55	XP_022859317.1	sugar_phosphate/phosphate_translocator_At2g25520	Olive
LOC111412402	2.24236	4.73171	8.97e-11	4.54e-10	XP_022899092.1	potassium_transporter_5-like	Olive
LOC111393478	2.18014	4.53198	7.29e-07	2.6e-06	XP_022874789.1	sodium/calcium_exchanger_NCL2-like	Olive
LOC111381568	2.1358	4.3948	2.01e-15	1.38e-14		equilibrative_nucleotide_transporter_3-like	Olive
LOC111388976	2.09765	4.2801	4.74e-08	1.91e-07	XP_022869579.1	mechanosensitive_ion_channel_protein_10-like,_transcript_variant_X2	Olive
LOC111388217	2.07597	4.21626	4.23e-56	1.18e-54	XP_022868671.1	aquaporin_PIP1-1-like	Olive
LOC111384421	2.04839	4.13645	7.67e-46	1.67e-44	XP_022864462.1	ABC_transporter_C_family_member_3-like	Olive
LOC111390084	2.04081	4.11477	4.34e-14	2.74e-13		organic_cation/carnitine_transporter_7-like	Olive
LOC111405980	2.02464	4.06891	3.69e-12	2.06e-11	XP_022890898.1	ABC_transporter_G_family_member_6-like	Olive
LOC111371596	2.00499	4.01387	6.04e-07	2.17e-06	XP_022849431.1	inorganic_phosphate_transporter_1-4-like,_transcript_variant_X2	Olive
LOC111366748	1.99917	3.9977	1.25e-12	7.18e-12		polyamine_transporter_At3g13620	Olive
LOC111381788	1.99098	3.97507	8.11e-15	5.37e-14	XP_022861383.1	lysine_histidine_transporter-like_8	Olive
LOC111386364	1.98377	3.95525	0.0102049	0.0200117	XP_022866608.1	cyclic_nucleotide-gated_ion_channel_5,_transcript_variant_X4	Olive
LOC111376937	1.97661	3.93567	2.13e-27	2.55e-26	XP_022855721.1	boron_transporter_1-like	Olive
LOC111387861	1.97189	3.9228	6.76e-07	2.42e-06	XP_022868226.1	nucleobase-ascorbate_transporter_12-like	Olive
LOC111368652	1.93456	3.82263	2.14e-08	8.9e-08	XP_022845788.1	amino_acid_permease_8-like	Olive
LOC111400866	1.91798	3.77893	1.97e-31	2.76e-30	XP_022884075.1	WAT1-related_protein_At5g40240-like	Olive
LOC111411289	1.85067	3.60669	0.000177411	0.000466922	XP_022897606.1	sodium/pyruvate_cotransporter_BASS2,_chloroplastic,_transcript_variant_X2	Olive
LOC111395701	1.84635	3.59589	0.000242005	0.000624241	XP_022877589.1	cyclic_nucleotide-gated_ion_channel_4-like	Olive
LOC111370590	1.83492	3.56752	4.39e-72	1.68e-70	XP_022848149.1	triose_phosphate/phosphate_translocator,_chloroplastic	Olive
LOC111397557	1.81357	3.51511	3.07e-27	3.65e-26	XP_022880316.1	rop_guanine_nucleotide_exchange_factor_1-like	Olive
LOC111402524	1.80769	3.50081	2.95e-33	4.38e-32	XP_022886667.1	choline_transporter_protein_1,_transcript_variant_X3	Olive
LOC111397871	1.78059	3.43567	3.74e-60	1.15e-58	XP_022880608.1	phospholipid-transporting_ATPase_8	Olive
LOC111412334	1.74336	3.34814	9.8e-22	9.23e-21	XP_022898991.1	ABC_transporter_C_family_member_12-like,_transcript_variant_X2	Olive
LOC111382308	1.73213	3.32219	6.81e-10	3.22e-09	XP_022862004.1	lysine_histidine_transporter-like_8,_transcript_variant_X2	Olive
LOC111406464	1.72766	3.31189	1.15e-20	1.02e-19	XP_022891654.1	boron_transporter_1-like	Olive
LOC111410735	1.70973	3.271	1.2e-22	1.18e-21	XP_022896994.1	sodium/metabolite_cotransporter_BASS2,_chloroplastic	Olive
LOC111392008	1.6798	3.20383	8.48e-16	5.93e-15	XP_022873066.1	polyamine_transporter_At1g31830,_transcript_variant_X2	Olive
LOC111396943	1.67372	3.19036	4.29e-35	6.71e-34	XP_022879330.1	ABC_transporter_B_family_member_15-like	Olive
LOC111401099	1.66808	3.17791	3.83e-08	1.56e-07	XP_022884425.1	amino_acid_permease_3-like	Olive
LOC111382816	1.66058	3.16143	7.4e-35	1.15e-33	XP_022862625.1	plastidic_glucose_transporter_4,_transcript_variant_X2	Olive
LOC111406350	1.64026	3.11722	7.25e-19	5.95e-18	XP_022891530.1	WAT1-related_protein_At5g40240-like	Olive
LOC111375112	1.61885	3.0713	1.9e-05	5.7e-05	XP_022853669.1	polyamine_transporter_At1g31830	Olive
LOC111370511	1.56544	2.95968	1.19e-15	8.23e-15	XP_022847998.1	aquaporin_NIP1-1-like	Olive
LOC111391325	1.56523	2.95924	2.02e-11	1.07e-10	XP_022872294.1	nucleobase-ascorbate_transporter_12-like	Olive
LOC111407385	1.55381	2.93592	9.23e-17	6.82e-16	XP_022892582.1	ABC_transporter_G_family_member_28-like,_transcript_variant_X4	Olive
LOC111389161	1.54698	2.92205	1.49e-05	4.51e-05	XP_022869812.1	CMP-sialic_acid_transporter_4,_transcript_variant_X3	Olive
LOC111387329	1.54591	2.91987	2.37e-22	2.31e-21	XP_022867655.1	nitrate_regulatory_gene2_protein-like	Olive
LOC111378200	1.51737	2.86268	7.24e-19	5.95e-18	XP_022857135.1	cyclic_nucleotide-gated_ion_channel_14	Olive
LOC111395526	1.51398	2.85597	1.55e-20	1.37e-19	XP_022877318.1	WAT1-related_protein_At3g28050-like	Olive
LOC111407274	1.51339	2.85481	6.28e-07	2.25e-06	XP_022892425.1	potassium_channel_KAT3-like,_transcript_variant_X2	Olive
LOC111379567	1.48606	2.80123	2.81e-05	8.24e-05	XP_022858732.1	mechanosensitive_ion_channel_protein_10-like,_transcript_variant_X2	Olive
LOC111406904	1.47789	2.78541	2.05e-19	1.73e-18	XP_022892034.1	ABC_transporter_G_family_member_3	Olive
LOC111380601	1.47468	2.77922	1.66e-21	1.55e-20	XP_022859982.1	pectate_lyase_5	Olive
LOC111370982	1.47025	2.77069	7.64e-08	3.01e-07	XP_022848676.1	amino_acid_permease_7	Olive
LOC111391860	1.46716	2.76478	5.66e-06	1.81e-05	XP_022872906.1	rop_guanine_nucleotide_exchange_factor_3-like,_transcript_variant_X2	Olive
LOC111382593	1.46617	2.76288	1.03e-12	5.96e-12	XP_022862381.1	aquaporin_PIP2-1-like	Olive
LOC111404756	1.4493	2.73075	1.29e-14	8.41e-14		heavy_metal-associated_isoprenylated_plant_protein_3-like	Olive
LOC111382339	1.4363	2.70626	1.66e-05	5.01e-05	XP_022862046.1	ABC_transporter_C_family_member_4-like	Olive
LOC111376681	1.39128	2.62311	5.18e-06	1.67e-05	XP_022855418.1	ABC_transporter_G_family_member_3-like	Olive
LOC111384809	1.39082	2.62228	6.66e-05	0.000186403	XP_022864908.1	sugar_phosphate/phosphate_translocator_At3g14410	Olive
LOC111378082	1.38537	2.61239	1.18e-33	1.78e-32	XP_022857160.1	pleiotropic_drug_resistance_protein_2-like,_transcript_variant_X3	Olive
LOC111397930	1.38261	2.60739	1.21e-32	1.76e-31	XP_022880662.1	ABC_transporter_G_family_member_5-like	Olive
LOC111375674	1.37895	2.60079	5.56e-17	4.17e-16	XP_022854307.1	nucleobase-ascorbate_transporter_12-like	Olive
LOC111384738	1.3654	2.57648	6.33e-16	4.46e-15	XP_022864824.1	rop_guanine_nucleotide_exchange_factor_5-like	Olive
LOC111407470	1.36106	2.56874	1.6e-07	6.09e-07	XP_022892734.1	K(+)_efflux_antiporter_6-like	Olive
LOC111382345	1.35937	2.56573	5.12e-08	2.05e-07		ABC_transporter_C_family_member_4-like	Olive
LOC111383669	1.3544	2.55692	1.05e-05	3.25e-05	XP_022863569.1	ABC_transporter_G_family_member_32-like,_transcript_variant_X2	Olive
LOC111388223	1.35422	2.5566	5.67e-09	2.49e-08	XP_022868680.1	aquaporin_NIP5-1	Olive
LOC111382785	1.35259	2.55371	2.31e-10	1.13e-09	XP_022862590.1	zinc_transporter_5,_transcript_variant_X2	Olive
LOC111367054	1.34141	2.53399	2.69e-09	1.21e-08	XP_022843513.1	zinc_transporter_11-like	Olive
LOC111388892	1.3338	2.52066	2.54e-09	1.15e-08	XP_022869485.1	hexose_carrier_protein_HEX6-like	Olive
LOC111403580	1.33145	2.51656	0.0244114	0.0439686	XP_022887911.1	ATPase_ASNA1_homolog	Olive
LOC111375133	1.32561	2.50638	1.88e-09	8.58e-09	XP_022853699.1	selenoprotein_H-like	Olive
LOC111372299	1.30963	2.47878	1.63e-16	1.19e-15	XP_022850445.1	potassium_channel_SKOR-like,_transcript_variant_X2	Olive
LOC111399797	1.29838	2.45953	6.03e-07	2.17e-06	XP_022883056.1	sodium_transporter_HKT1-like	Olive
LOC111372270	1.29306	2.45047	0.000597444	0.00145199	XP_022850280.1	amino_acid_permease_3-like	Olive
LOC111406034	1.29198	2.44864	2.63e-13	1.58e-12	XP_022890978.1	ABC_transporter_I_family_member_6,_chloroplastic	Olive
LOC111377165	1.29089	2.44679	2.39e-08	9.91e-08	XP_022855988.1	WAT1-related_protein_At4g19185-like	Olive
LOC111406050	1.27288	2.41643	2.22e-05	6.6e-05	XP_022891002.1	amino_acid_transporter_AVT6C-like,_transcript_variant_X2	Olive
LOC111412117	1.27247	2.41575	8.62e-10	4.05e-09	XP_022898660.1	sodium/calcium_exchanger_NCL2-like	Olive
LOC111393573	1.27077	2.4129	7.39e-06	2.33e-05	XP_022874939.1	mitochondrial_proton/calcium_exchanger_protein-like,_transcript_variant_X3	Olive
LOC111377733	1.25919	2.39361	4.74e-07	1.73e-06	XP_022856629.1	ABC_transporter_B_family_member_15-like	Olive
LOC111399728	1.25336	2.38397	5.7e-12	3.15e-11	XP_022882966.1	inorganic_phosphate_transporter_1-4-like,_transcript_variant_X5	Olive
LOC111404269	1.24119	2.36394	7.73e-08	3.04e-07	XP_022888853.1	ABC_transporter_B_family_member_26,_chloroplastic-like,_transcript_variant_X2	Olive
LOC111381307	1.2361	2.3556	1.35e-27	1.63e-26	XP_022860852.1	mechanosensitive_ion_channel_protein_10-like	Olive
LOC111365316	1.22989	2.34548	6.84e-05	0.000191158	XP_022841531.1	ammonium_transporter_3_member_2-like	Olive
LOC111366685	1.21933	2.32838	4.4e-09	1.95e-08	XP_022843159.1	plastidic_glucose_transporter_1	Olive
LOC111401526	1.21659	2.32396	3.86e-08	1.57e-07	XP_022885067.1	phospholipid-transporting_ATPase_1	Olive
LOC111401471	1.20526	2.30579	7.41e-26	8.33e-25	XP_022884978.1	plastidic_ATP/ADP-transporter-like	Olive
LOC111399338	1.20349	2.30297	3.59e-22	3.46e-21	XP_022882363.1	ABC_transporter_G_family_member_32-like,_transcript_variant_X4	Olive
LOC111386344	1.18698	2.27676	2.28e-10	1.12e-09	XP_022866575.1	CTL-like_protein_DDB_G0274487	Olive
LOC111398473	1.16444	2.24146	7.72e-06	2.43e-05	XP_022881155.1	sugar_phosphate/phosphate_translocator_At1g12500	Olive
LOC111397014	1.15881	2.23274	4.15e-09	1.84e-08	XP_022879444.1	GDP-mannose_transporter_GONST3	Olive
LOC111366568	1.15694	2.22984	0.00278551	0.00606104	XP_022843066.1	aquaporin_TIP2-1-like	Olive
LOC111376770	1.15542	2.22749	2.67e-05	7.86e-05	XP_022855532.1	glutamate_receptor_2.7-like	Olive
LOC111376789	1.15021	2.21947	9.84e-16	6.86e-15	XP_022855560.1	K(+)_efflux_antiporter_3,_chloroplastic-like	Olive
LOC111367334	1.1344	2.19527	5.66e-06	1.81e-05	XP_022843919.1	boron_transporter_4-like	Olive
LOC111377906	1.13436	2.19521	2.59e-07	9.65e-07	XP_022856823.1	hexose_carrier_protein_HEX6-like	Olive
LOC111390613	1.12891	2.18693	1.33e-10	6.63e-10	XP_022871445.1	cyclic_nucleotide-gated_ion_channel_1-like	Olive
LOC111395484	1.12565	2.182	4.86e-06	1.57e-05	XP_022877262.1	calcium-binding_protein_CML21	Olive
LOC111399085	1.12481	2.18072	5.65e-06	1.81e-05	XP_022882086.1	K(+)_efflux_antiporter_6-like,_transcript_variant_X9	Olive
LOC111400145	1.12206	2.17658	2.7e-15	1.83e-14	XP_022883350.1	potassium_transporter_8-like	Olive
LOC111410467	1.10422	2.14982	2.22e-07	8.36e-07	XP_022896585.1	calcium-transporting_ATPase_4,_plasma_membrane-type-like	Olive
LOC111367765	1.09685	2.13887	3.17e-09	1.42e-08	XP_022844585.1	CSC1-like_protein_At1g32090,_transcript_variant_X2	Olive
LOC111404607	1.09654	2.13841	2.74e-16	1.97e-15	XP_022889160.1	cadmium/zinc-transporting_ATPase_HMA3-like	Olive
LOC111385702	1.09017	2.12899	9.48e-21	8.49e-20	XP_022865891.1	sugar_transport_protein_13-like	Olive
LOC111373817	1.08584	2.12261	3.38e-13	2.02e-12	XP_022852165.1	magnesium_transporter_MRS2-5,_transcript_variant_X6	Olive
LOC111389789	1.08262	2.11787	9.46e-06	2.95e-05	XP_022870527.1	protein_PNS1-like	Olive
LOC111375026	1.07349	2.10451	2.58e-16	1.86e-15	XP_022853586.1	magnesium-chelatase_subunit_ChlH,_chloroplastic	Olive
LOC111400082	1.07305	2.10388	7.7e-07	2.74e-06	XP_022883327.1	ATPase_GET3-like,_transcript_variant_X6	Olive
LOC111409953	1.06162	2.08728	3e-07	1.12e-06	XP_022895850.1	CMP-sialic_acid_transporter_1	Olive
LOC111371443	1.05965	2.08443	5.97e-10	2.83e-09	XP_022849205.1	chloride_channel_protein_CLC-e,_transcript_variant_X3	Olive
LOC111411757	1.028	2.03919	0.00270148	0.00589344	XP_022898121.1	sugar_transporter_ERD6-like_5,_transcript_variant_X3	Olive
LOC111410476	1.02658	2.03719	7.27e-10	3.43e-09	XP_022896599.1	protein_PNS1-like	Olive
LOC111379482	1.0238	2.03327	2.06e-08	8.58e-08	XP_022858623.1	sodium/metabolite_cotransporter_BASS6,_chloroplastic,_transcript_variant_X2	Olive
LOC111369666	1.02284	2.03192	1.62e-06	5.57e-06	XP_022847035.1	D-xylose-proton_symporter-like_3,_chloroplastic	Olive
LOC111372047	1.02262	2.0316	6.16e-08	2.45e-07	XP_022849968.1	folate-biopterin_transporter_3	Olive
LOC111412471	1.01915	2.02672	4.77e-09	2.11e-08	XP_022899174.1	ABC_transporter_B_family_member_4-like,_transcript_variant_X3	Olive
LOC111386159	1.01418	2.01975	1.68e-07	6.39e-07	XP_022866379.1	sugar_phosphate/phosphate_translocator_At1g12500	Olive
LOC111399652	1.01034	2.01438	8.23e-10	3.87e-09	XP_022882855.1	calcium-binding_protein_CML49	Olive
LOC111386095	1.00412	2.00572	2.33e-08	9.65e-08	XP_022866293.1	mitochondrial_dicarboxylate/tricarboxylate_transporter_DTC	Olive
LOC111402769	0.990992	1.98755	1.81e-06	6.18e-06	XP_022886875.1	cyclic_nucleotide-gated_ion_channel_20,_chloroplastic	Olive
LOC111399034	0.972972	1.96288	0.000375341	0.000940759	XP_022882002.1	lysine_histidine_transporter-like_6	Olive
LOC111385275	0.970598	1.95965	8.19e-11	4.16e-10	XP_022865425.1	K(+)_efflux_antiporter_4-like,_transcript_variant_X2	Olive
LOC111374135	0.961271	1.94702	2.51e-07	9.37e-07	XP_022852532.1	nucleobase-ascorbate_transporter_6-like,_transcript_variant_X5	Olive
LOC111408029	0.955727	1.93956	5.54e-06	1.78e-05	XP_022893544.1	ammonium_transporter_2	Olive
LOC111372930	0.955154	1.93879	2.41e-08	9.99e-08	XP_022851125.1	purine_permease_3-like	Olive
LOC111366941	0.947539	1.92858	0.0212744	0.038925	XP_022843389.1	calcium-binding_protein_CML30	Olive
LOC111395699	0.933845	1.91036	4.25e-09	1.88e-08	XP_022877587.1	cyclic_nucleotide-gated_ion_channel_4-like,_transcript_variant_X3	Olive
LOC111399552	0.922494	1.89539	3.47e-09	1.55e-08	XP_022882712.1	amino_acid_transporter_AVT1A-like,_transcript_variant_X5	Olive
LOC111385285	0.916797	1.88792	6.82e-07	2.44e-06	XP_022865437.1	copper-transporting_ATPase_PAA1,_chloroplastic-like,_transcript_variant_X4	Olive
LOC111370581	0.898567	1.86421	1.68e-07	6.39e-07	XP_022848136.1	glutamate_receptor_2.7-like	Olive
LOC111369645	0.89723	1.86249	2.68e-13	1.61e-12	XP_022847009.1	calcium-transporting_ATPase_4,_endoplasmic_reticulum-type-like,_transcript_variant_X2	Olive
LOC111379341	0.890824	1.85423	6.4e-16	4.51e-15	XP_022858467.1	calcium-transporting_ATPase_1-like	Olive
LOC111409809	0.887463	1.84992	7.47e-07	2.66e-06	XP_022895638.1	chloride_channel_protein_CLC-c-like	Olive
LOC111400481	0.885713	1.84768	0.017568	0.0327328	XP_022883663.1	boron_transporter_2	Olive
LOC111377999	0.87943	1.83965	9.63e-08	3.75e-07	XP_022856927.1	calcium-transporting_ATPase_9,_plasma_membrane-type	Olive
LOC111375175	0.878947	1.83903	1.35e-05	4.11e-05	XP_022853743.1	ABC_transporter_C_family_member_10-like	Olive
LOC111401941	0.876241	1.83559	0.0248724	0.0447055	XP_022885696.1	folate_transporter_1,_chloroplastic,_transcript_variant_X2	Olive
LOC111406702	0.873197	1.83172	3.47e-05	0.000100727	XP_022891851.1	sodium/hydrogen_exchanger_7-like	Olive
LOC111401989	0.869155	1.82659	0.000536692	0.00131326		cadmium/zinc-transporting_ATPase_HMA1,_chloroplastic	Olive
LOC111396839	0.867073	1.82396	1.31e-11	7.04e-11	XP_022879145.1	cationic_amino_acid_transporter_5	Olive
LOC111371275	0.86661	1.82337	0.00753136	0.0151608	XP_022848939.1	glutamate_receptor_1.2-like	Olive
LOC111381703	0.866546	1.82329	3.92e-05	0.000113082	XP_022861289.1	copper-transporting_ATPase_PAA1,_chloroplastic-like,_transcript_variant_X2	Olive
LOC111387808	0.859472	1.81437	0.000162979	0.000431079	XP_022868165.1	lysine_histidine_transporter_1-like	Olive
LOC111399412	0.857155	1.81146	0.000206626	0.000539019	XP_022882479.1	ABC_transporter_B_family_member_8,_transcript_variant_X2	Olive
LOC111411423	0.851069	1.80384	4.21e-07	1.54e-06	XP_022897728.1	polygalacturonase	Olive
LOC111406347	0.840077	1.79015	0.0020396	0.00454475	XP_022891524.1	potassium_transporter_6-like,_transcript_variant_X6	Olive
LOC111371547	0.831792	1.77989	0.0212929	0.0389567	XP_022849366.1	solute_carrier_family_25_member_44-like,_transcript_variant_X2	Olive
LOC111412118	0.831563	1.77961	4.41e-05	0.000126214	XP_022898661.1	glutamate_receptor_2.7-like	Olive
LOC111379536	0.824371	1.77076	0.00372147	0.0079203	XP_022858696.1	cyclic_nucleotide-gated_ion_channel_1-like,_transcript_variant_X2	Olive
LOC111378448	0.815248	1.7596	4.59e-08	1.85e-07	XP_022857414.1	dicarboxylate_transporter_2.1,_chloroplastic-like	Olive
LOC111410776	0.808637	1.75156	5.71e-10	2.72e-09	XP_022897069.1	K(+)_efflux_antiporter_2,_chloroplastic,_transcript_variant_X2	Olive
LOC111376790	0.802121	1.74366	1.45e-05	4.42e-05	XP_022855564.1	sphingolipid_transporter_spinster_homolog_2,_transcript_variant_X4	Olive
LOC111401885	0.795737	1.73596	2.56e-07	9.55e-07	XP_022885618.1	calcium_sensing_receptor,_chloroplastic	Olive
LOC111403484	0.792456	1.73202	5.58e-09	2.45e-08	XP_022887777.1	sugar_phosphate/phosphate_translocator_At3g17430	Olive
LOC111376901	0.783817	1.72168	4.99e-05	0.000141939	XP_022855678.1	nucleobase-ascorbate_transporter_6-like,_transcript_variant_X5	Olive
LOC111401234	0.780738	1.71801	2.17e-11	1.15e-10	XP_022884648.1	glutamate_receptor_3.6,_transcript_variant_X3	Olive
LOC111392336	0.759753	1.6932	2.94e-09	1.32e-08	XP_022873430.1	phospholipid-transporting_ATPase_8,_transcript_variant_X2	Olive
LOC111392336	0.759753	1.6932	2.94e-09	1.32e-08	XP_022873430.1	phospholipid-transporting_ATPase_8,_transcript_variant_X2	Olive
LOC111365271	0.756341	1.6892	0.00032335	0.000818932	XP_022841481.1	amino_acid_transporter_AVT1C-like	Olive
LOC111390030	0.756181	1.68901	4.14e-12	2.31e-11	XP_022870789.1	aquaporin_PIP1-1	Olive
LOC111407952	0.748599	1.68016	4.35e-10	2.08e-09	XP_022893446.1	ABC_transporter_G_family_member_32-like	Olive
LOC111407778	0.744254	1.67511	0.000876752	0.00207897	XP_022893215.1	anion_transporter_4,_chloroplastic,_transcript_variant_X4	Olive
LOC111395440	0.743589	1.67434	3.24e-12	1.82e-11	XP_022877203.1	ABC_transporter_G_family_member_7	Olive
LOC111407611	0.740555	1.67082	0.00025936	0.000665969	XP_022892986.1	mitochondrial_import_inner_membrane_translocase_subunit_Tim13-like,_transcript_variant_X2	Olive
LOC111384104	0.73632	1.66592	0.0140144	0.0267097	XP_022864109.1	calcium_and_calcium/calmodulin-dependent_serine/threonine-protein_kinase-like	Olive
LOC111371809	0.731702	1.6606	1.84e-05	5.52e-05	XP_022849752.1	pleiotropic_drug_resistance_protein_1-like,_transcript_variant_X2	Olive
LOC111372345	0.730727	1.65947	0.0140209	0.026719	XP_022850411.1	cyclic_nucleotide-gated_ion_channel_20,_chloroplastic	Olive
LOC111381380	0.720075	1.64727	0.0001884	0.000494041	XP_022860926.1	tyrosine-specific_transport_protein-like	Olive
LOC111382078	0.716551	1.64325	0.000240127	0.000619815	XP_022861717.1	sec-independent_protein_translocase_protein_TATC,_chloroplastic-like,_transcript_variant_X2	Olive
LOC111377989	0.715209	1.64172	2.67e-12	1.5e-11	XP_022856919.1	magnesium-chelatase_subunit_ChlH,_chloroplastic-like	Olive
LOC111404275	0.713124	1.63935	1.86e-09	8.51e-09	XP_022888869.1	rop_guanine_nucleotide_exchange_factor_14-like,_transcript_variant_X2	Olive
LOC111384812	0.698866	1.62323	0.00263415	0.00575664		calcium-transporting_ATPase_11,_plasma_membrane-type	Olive
LOC111372870	0.697441	1.62163	3.63e-05	0.000105192	XP_022851054.1	sugar_transporter_ERD6-like_7,_transcript_variant_X3	Olive
LOC111394526	0.692852	1.61648	0.00342565	0.00733575	XP_022876148.1	polyamine_transporter_At1g31830	Olive
LOC111410920	0.692805	1.61642	1.32e-05	4.03e-05	XP_022897289.1	heme_oxygenase_1,_chloroplastic-like,_transcript_variant_X2	Olive
LOC111407461	0.69192	1.61543	0.000154328	0.000409547	XP_022892712.1	mechanosensitive_ion_channel_protein_10-like	Olive
LOC111402505	0.69074	1.61411	0.001146	0.00266388	XP_022886638.1	glucose-6-phosphate/phosphate_translocator_1,_chloroplastic-like	Olive
LOC111399161	0.690645	1.614	4.12e-07	1.51e-06	XP_022882186.1	ascorbate-specific_transmembrane_electron_transporter_1,_transcript_variant_X3	Olive
LOC111405389	0.678059	1.59999	5.64e-05	0.000159381	XP_022890011.1	metal_tolerance_protein_11-like	Olive
LOC111376689	0.674677	1.59624	0.00204539	0.00455674	XP_022855429.1	anion_transporter_6,_chloroplastic	Olive
LOC111389786	0.669702	1.59074	2.01e-10	9.92e-10	XP_022870522.1	cation/calcium_exchanger_1	Olive
LOC111382675	0.658201	1.57811	6.23e-08	2.47e-07	XP_022862490.1	K(+)_efflux_antiporter_2,_chloroplastic-like,_transcript_variant_X2	Olive
LOC111382675	0.658201	1.57811	6.23e-08	2.47e-07	XP_022862490.1	K(+)_efflux_antiporter_2,_chloroplastic-like,_transcript_variant_X2	Olive
LOC111378049	0.64982	1.56897	9.94e-06	3.09e-05	XP_022856978.1	aquaporin_PIP1-4	Olive
LOC111396701	0.646618	1.56549	0.000919263	0.00217074	XP_022878937.1	sugar_phosphate/phosphate_translocator_At3g17430,_transcript_variant_X4	Olive
LOC111410691	0.640776	1.55917	0.000112714	0.000305012		sphingolipid_transporter_spinster_homolog_2	Olive
LOC111378545	0.639532	1.55782	0.00302659	0.0065374	XP_022857530.1	glutamate_receptor_3.3-like	Olive
LOC111366880	0.638279	1.55647	1.33e-06	4.62e-06	XP_022843334.1	ABC_transporter_G_family_member_35-like	Olive
LOC111367211	0.629905	1.54746	2.67e-05	7.86e-05	XP_022843734.1	cadmium/zinc-transporting_ATPase_HMA1,_chloroplastic	Olive
LOC111394784	0.62911	1.54661	0.000671899	0.00161902	XP_022876535.1	magnesium_transporter_NIPA4	Olive
LOC111404052	0.61891	1.53571	0.00663849	0.013512	XP_022888540.1	ABC_transporter_B_family_member_29,_chloroplastic,_transcript_variant_X4	Olive
LOC111393796	0.608898	1.52509	0.00272689	0.00594281	XP_022875269.1	UDP-rhamnose/UDP-galactose_transporter_6-like	Olive
LOC111373636	0.603623	1.51953	1.66e-06	5.69e-06	XP_022851963.1	silicon_efflux_transporter_LSI2-like,_transcript_variant_X3	Olive
LOC111368022	0.596703	1.51226	2.75e-06	9.16e-06	XP_022844955.1	cyclic_nucleotide-gated_ion_channel_17-like	Olive
LOC111412038	0.594169	1.5096	5.78e-07	2.09e-06	XP_022898544.1	polyol_transporter_4	Olive
LOC111388102	0.591824	1.50715	0.000117762	0.000317903	XP_022868530.1	pleiotropic_drug_resistance_protein_1-like	Olive
LOC111377643	0.586882	1.502	6.95e-06	2.2e-05	XP_022856536.1	D-xylose-proton_symporter-like_2	Olive
LOC111367029	0.58236	1.4973	3.04e-05	8.88e-05	XP_022843475.1	cyclic_nucleotide-gated_ion_channel_20,_chloroplastic,_transcript_variant_X3	Olive
LOC111376716	0.58227	1.4972	0.00363826	0.00775402	XP_022855463.1	mechanosensitive_ion_channel_protein_6-like	Olive
LOC111369695	0.581785	1.4967	0.000945615	0.00222719	XP_022847070.1	sodium-dependent_phosphate_transport_protein_1,_chloroplastic-like,_transcript_variant_X2	Olive
LOC111410182	0.577839	1.49261	0.010024	0.0197006	XP_022896184.1	sphingolipid_transporter_spinster_homolog_2,_transcript_variant_X3	Olive
LOC111387169	0.577311	1.49207	0.00724137	0.0146293	XP_022867477.1	CTL-like_protein_DDB_G0274487,_transcript_variant_X3	Olive
LOC111379982	0.574311	1.48897	0.0279103	0.0495408	XP_022859196.1	ABC_transporter_B_family_member_25,_mitochondrial,_transcript_variant_X6	Olive
LOC111408776	0.574299	1.48895	0.0229298	0.0415671	XP_022894331.1	ABC_transporter_I_family_member_11,_chloroplastic,_transcript_variant_X3	Olive
LOC111388320	0.567007	1.48145	0.00398992	0.00844994		sucrose_transport_protein_SUC4	Olive
LOC111393482	0.564194	1.47856	0.00680047	0.0138116	XP_022874797.1	ABC_transporter_B_family_member_25,_mitochondrial-like,_transcript_variant_X2	Olive
LOC111396339	0.563988	1.47835	0.000100948	0.000275277	XP_022878519.1	molybdate-anion_transporter-like	Olive
LOC111407221	0.556313	1.47051	0.0126784	0.024379	XP_022892344.1	aquaporin_NIP1-1-like,_transcript_variant_X4	Olive
LOC111398606	0.554948	1.46912	0.000161687	0.000427962	XP_022881364.1	WAT1-related_protein_At3g45870-like,_transcript_variant_X5	Olive
LOC111385840	0.552587	1.46671	0.00203593	0.00453776	XP_022866039.1	vacuolar_cation/proton_exchanger_3-like,_transcript_variant_X6	Olive
LOC111407200	0.550616	1.46471	0.00906001	0.0179782	XP_022892308.1	sodium/hydrogen_exchanger_6-like	Olive
LOC111378535	0.545522	1.45955	0.000684127	0.00164683	XP_022857524.1	glutamate_receptor_3.3-like	Olive
LOC111381555	0.540685	1.45466	0.00186639	0.00418458	XP_022861118.1	receptor-like_protein_kinase_At1g11050	Olive
LOC111391214	0.534772	1.44871	0.000943982	0.00222396	XP_022872150.1	lysine_histidine_transporter_1-like,_transcript_variant_X6	Olive
LOC111411926	0.52718	1.44111	0.0179037	0.0332846	XP_022898374.1	tyrosine-specific_transport_protein,_transcript_variant_X4	Olive
LOC111377166	0.515111	1.4291	0.00636958	0.0130064	XP_022855989.1	WAT1-related_protein_At4g19185-like	Olive
LOC111380603	0.506124	1.42023	0.000617614	0.00149841	XP_022859984.1	serine/threonine-protein_kinase_At1g54610	Olive
LOC111406508	0.502248	1.41642	0.000409798	0.00102073	XP_022891687.1	mitochondrial_proton/calcium_exchanger_protein-like	Olive
LOC111413001	0.49364	1.40799	0.00588092	0.012093	XP_022899648.1	WAT1-related_protein_At5g07050-like	Olive
LOC111372921	0.478365	1.39316	0.0139991	0.0266851	XP_022851117.1	copper-transporting_ATPase_PAA2,_chloroplastic-like	Olive
LOC111402481	0.472953	1.38795	0.0211496	0.0387113	XP_022886594.1	two-pore_potassium_channel_1-like,_transcript_variant_X3	Olive
LOC111407159	0.459114	1.3747	0.0039814	0.00843348	XP_022892252.1	sugar_carrier_protein_C-like	Olive
LOC111395610	0.458036	1.37367	0.00185924	0.00416993	XP_022877453.1	glutamate_receptor_2.8-like,_transcript_variant_X2	Olive
LOC111391551	0.456885	1.37257	0.00558246	0.0115215	XP_022872553.1	ATPase_GET3-like	Olive
LOC111369468	0.456696	1.3724	0.00110767	0.00257924	XP_022846754.1	sugar_transport_protein_13-like	Olive
LOC111406792	0.447094	1.36329	0.0201786	0.0371037	XP_022891934.1	molybdate-anion_transporter-like	Olive
LOC111397957	0.445756	1.36203	0.000418812	0.00104136	XP_022880687.1	nucleobase-ascorbate_transporter_11	Olive
LOC111365987	0.445528	1.36181	0.00259925	0.0056874	XP_022842356.1	cyclic_nucleotide-gated_ion_channel_17-like,_transcript_variant_X2	Olive
LOC111407720	0.441105	1.35764	0.0106522	0.0207992	XP_022893129.1	kinesin-like_protein_KIN-5D	Olive
LOC111388101	0.441055	1.3576	0.0027193	0.00592809	XP_022868529.1	pleiotropic_drug_resistance_protein_1-like	Olive
LOC111368174	0.435352	1.35224	0.0128067	0.0246017	XP_022845184.1	anion_transporter_5	Olive
LOC111372860	0.434147	1.35111	0.00565108	0.0116489	XP_022851042.1	calcium_homeostasis_endoplasmic_reticulum_protein-like,_transcript_variant_X2	Olive
LOC111407239	0.429897	1.34714	0.000340235	0.000858205	XP_022892371.1	purine_permease_21-like	Olive
LOC111378740	0.428848	1.34616	0.000453856	0.00112257		aquaporin_PIP2-7-like	Olive
LOC111374390	0.425806	1.34332	0.010053	0.0197484	XP_022852824.1	voltage-gated_potassium_channel_subunit_beta	Olive
LOC111384799	0.423421	1.3411	9.03e-05	0.00024808	XP_022864891.1	GDP-fucose_transporter_1	Olive
LOC111369816	0.420547	1.33843	0.0104407	0.0204312	XP_022847251.1	piezo-type_mechanosensitive_ion_channel_homolog,_transcript_variant_X3	Olive
LOC111397011	0.406206	1.3252	0.00278734	0.00606424	XP_022879439.1	amino_acid_transporter_AVT6A-like,_transcript_variant_X3	Olive
LOC111370434	0.40281	1.32208	0.0183182	0.0339745	XP_022847903.1	copper-transporting_ATPase_RAN1	Olive
LOC111375126	0.382598	1.30369	0.00088629	0.00209937	XP_022853690.1	serine/threonine-protein_kinase_At5g41260	Olive
LOC111401916	0.378432	1.29993	0.0196821	0.0362741	XP_022885662.1	magnesium_transporter_MRS2-1-like,_transcript_variant_X2	Olive
LOC111384327	0.359522	1.283	0.0247686	0.044526	XP_022864362.1	chloride_channel_protein_CLC-d,_transcript_variant_X2	Olive
LOC111378718	0.34151	1.26708	0.00607235	0.0124539	XP_022857721.1	inorganic_phosphate_transporter_1-4-like,_transcript_variant_X2	Olive
LOC111380201	0.336214	1.26244	0.0123641	0.0238386	XP_022859461.1	ion_channel_CASTOR-like,_transcript_variant_X2	Olive
LOC111379444	0.321841	1.24992	0.0117885	0.0228283	XP_022858586.1	voltage-gated_potassium_channel_subunit_beta	Olive
LOC111370485	0.280445	1.21457	0.0183784	0.034073	XP_022847972.1	cationic_amino_acid_transporter_1-like,_transcript_variant_X3	Olive
LOC111396956	0.264361	1.2011	0.0190863	0.0352707	XP_022879360.1	ABC_transporter_C_family_member_2-like,_transcript_variant_X3	Olive
LOC111407179	0.240862	1.1817	0.0254537	0.0456283	XP_022892279.1	oligopeptide_transporter_3	Olive
LOC111369629	0.319233	1.24767	0.00626414	0.0128121	XP_022846987.1	actin-depolymerizing_factor_2-like,_transcript_variant_X3	Olive
LOC111394911	0.480371	1.3951	0.00742058	0.0149546	XP_022876740.1	actin-related_protein_3,_transcript_variant_X3	Olive
LOC111387113	0.914034	1.88431	0.000124787	0.000335335		actin-related_protein_3-like	Olive
LOC111372117	0.782744	1.7204	0.000109126	0.000295826	XP_022850063.1	actin-related_protein_4-like	Olive
LOC111390685	1.14068	2.20485	2.96e-07	1.1e-06	XP_022871519.1	actin-related_protein_4-like	Olive
LOC111377546	0.403484	1.3227	0.0112214	0.0218244	XP_022856445.1	actin-related_protein_5,_transcript_variant_X2	Olive
LOC111407978	0.880427	1.84092	2.72e-06	9.06e-06	XP_022893480.1	actin-related_protein_6,_transcript_variant_X6	Olive
LOC111370356	0.53964	1.45361	0.000483897	0.00119162	XP_022847795.1	actin-related_protein_7,_transcript_variant_X3	Olive
LOC111393651	0.724413	1.65223	3.13e-05	9.13e-05	XP_022875065.1	actin-related_protein_9,_transcript_variant_X2	Olive
LOC111412345	0.461274	1.37676	0.0136494	0.0260745	XP_022899003.1	ADP-ribosylation_factor_GTPase-activating_protein_AGD12-like,_transcript_variant_X6	Olive
LOC111384468	1.0732	2.1041	4.28e-09	1.9e-08	XP_022864514.1	ADP-ribosylation_factor_GTPase-activating_protein_AGD2-like	Olive
LOC111396120	1.25087	2.37986	4.56e-14	2.88e-13	XP_022878199.1	ADP-ribosylation_factor_GTPase-activating_protein_AGD3-like,_transcript_variant_X4	Olive
LOC111369482	1.93145	3.81438	1.69e-52	4.35e-51	XP_022846772.1	COP1-interacting_protein_7,_transcript_variant_X5	Olive
LOC111380191	1.43894	2.71122	6.45e-14	4.02e-13	XP_022859451.1	cysteine_synthase,_chloroplastic/chromoplastic-like,_transcript_variant_X2	Olive
LOC111384154	0.810117	1.75335	0.0184322	0.0341671	XP_022864207.1	DAR_GTPase_2,_mitochondrial,_transcript_variant_X6	Olive
LOC111388548	0.746265	1.67744	0.0255801	0.0458329	XP_022869060.1	DAR_GTPase_3,_chloroplastic,_transcript_variant_X2	Olive
LOC111394700	1.98757	3.96569	2.63e-18	2.1e-17	XP_022876412.1	dynamin-like_protein_ARC5	Olive
LOC111373246	1.03777	2.05305	2.35e-05	6.97e-05	XP_022851521.1	dynamin-related_protein_1E-like	Olive
LOC111377553	0.443547	1.35994	0.00189488	0.0042442	XP_022856450.1	dynamin-related_protein_1E-like	Olive
LOC111395317	1.6987	3.24608	2.72e-08	1.12e-07	XP_022877067.1	dynamin-related_protein_1E-like	Olive
LOC111410204	0.323976	1.25178	0.0115172	0.022344	XP_022896212.1	dynamin-related_protein_3A-like,_transcript_variant_X2	Olive
LOC111380395	1.03513	2.0493	5.01e-11	2.59e-10	XP_022859719.1	dynamin-related_protein_5A	Olive
LOC111371269	2.25592	4.7764	5.49e-21	4.97e-20	XP_022848931.1	formin-like_protein_1	Olive
LOC111403158	1.12912	2.18725	3.57e-11	1.86e-10	XP_022887329.1	gamma-tubulin_complex_component_2	Olive
LOC111384278	1.33874	2.52931	0.000545331	0.00133257		gamma-tubulin_complex_component_3	Olive
LOC111369851	0.796659	1.73707	0.0233596	0.0422574	XP_022847311.1	gamma-tubulin_complex_component_4_homolog	Olive
LOC111392501	1.79126	3.46117	1.62e-10	8.06e-10	XP_022873628.1	GTPase_Der	Olive
LOC111409803	0.62467	1.54186	0.000495072	0.00121798	XP_022895621.1	GTPase_Der,_transcript_variant_X3	Olive
LOC111397219	1.25922	2.39367	6.82e-09	2.97e-08	XP_022879779.1	GTPase_ERA-like,_chloroplastic	Olive
LOC111369518	0.982391	1.97574	3.44e-09	1.54e-08	XP_022846832.1	kinesin_light_chain_3,_transcript_variant_X2	Olive
LOC111393353	2.6638	6.33701	1.96e-33	2.91e-32	XP_022874623.1	kinesin-like_protein_KIN-10A	Olive
LOC111388940	1.99818	3.99496	4.47e-22	4.28e-21	XP_022869540.1	kinesin-like_protein_KIN-10B,_transcript_variant_X3	Olive
LOC111390802	1.98539	3.95971	7.83e-10	3.69e-09	XP_022871686.1	kinesin-like_protein_KIN-10C,_transcript_variant_X2	Olive
LOC111388492	1.97248	3.92442	6.94e-21	6.25e-20	XP_022868998.1	kinesin-like_protein_KIN-12D,_transcript_variant_X3	Olive
LOC111388776	2.40413	5.29318	4.05e-18	3.2e-17	XP_022869346.1	kinesin-like_protein_KIN-12E,_transcript_variant_X2	Olive
LOC111395766	2.53256	5.78596	3.32e-52	8.43e-51	XP_022877670.1	kinesin-like_protein_KIN-12F	Olive
LOC111367060	3.02743	8.15359	6.77e-26	7.61e-25	XP_022843524.1	kinesin-like_protein_KIN-12F,_transcript_variant_X2	Olive
LOC111368813	2.63598	6.21597	6.81e-37	1.13e-35	XP_022846043.1	kinesin-like_protein_KIN-12F,_transcript_variant_X2	Olive
LOC111410805	1.92352	3.79348	2.82e-29	3.64e-28	XP_022897118.1	kinesin-like_protein_KIN-12F,_transcript_variant_X6	Olive
LOC111396850	0.593783	1.5092	9.12e-06	2.85e-05	XP_022879169.1	kinesin-like_protein_KIN-13B	Olive
LOC111368007	1.27127	2.41373	3.14e-11	1.64e-10	XP_022844935.1	kinesin-like_protein_KIN-13B,_transcript_variant_X2	Olive
LOC111380454	0.830259	1.778	8.94e-05	0.000245856	XP_022859794.1	kinesin-like_protein_KIN-14E	Olive
LOC111378621	1.01818	2.02537	4.85e-10	2.32e-09	XP_022857620.1	kinesin-like_protein_KIN-14F	Olive
LOC111395137	1.46604	2.76262	3.54e-10	1.71e-09	XP_022876916.1	kinesin-like_protein_KIN-14F	Olive
LOC111404510	2.2138	4.63896	2.66e-23	2.69e-22	XP_022889073.1	kinesin-like_protein_KIN-14I	Olive
LOC111369858	2.46409	5.51779	3.23e-58	9.57e-57	XP_022847322.1	kinesin-like_protein_KIN-14I,_transcript_variant_X2	Olive
LOC111403874	2.99282	7.96029	5.72e-16	4.04e-15	XP_022888275.1	kinesin-like_protein_KIN-14L	Olive
LOC111392362	0.516991	1.43097	0.0197911	0.036465	XP_022873468.1	kinesin-like_protein_KIN-14L,_transcript_variant_X5	Olive
LOC111395653	2.44849	5.45843	5.16e-34	7.84e-33	XP_022877512.1	kinesin-like_protein_KIN-14N	Olive
LOC111397318	2.6365	6.21819	2.5e-27	2.98e-26	XP_022879937.1	kinesin-like_protein_KIN-14N	Olive
LOC111408281	2.1652	4.48529	3.95e-34	6.01e-33	XP_022893829.1	kinesin-like_protein_KIN-14R	Olive
LOC111410050	1.85778	3.62449	2.4e-16	1.73e-15	XP_022895979.1	kinesin-like_protein_KIN-14S,_transcript_variant_X3	Olive
LOC111377692	1.25388	2.38482	0.0045618	0.00956291		kinesin-like_protein_KIN-4A	Olive
LOC111385753	1.13442	2.19531	4.69e-18	3.7e-17	XP_022865937.1	kinesin-like_protein_KIN-4A,_transcript_variant_X2	Olive
LOC111371166	2.68737	6.44138	2.01e-07	7.58e-07	XP_022848841.1	kinesin-like_protein_KIN-4C	Olive
LOC111386239	0.854426	1.80804	0.000109482	0.000296768	XP_022866462.1	kinesin-like_protein_KIN-4C	Olive
LOC111371687	1.3332	2.51961	9.02e-11	4.57e-10	XP_022849584.1	kinesin-like_protein_KIN-4C,_transcript_variant_X3	Olive
LOC111369388	3.08713	8.49804	3.48e-21	3.19e-20	XP_022846650.1	kinesin-like_protein_KIN-5B	Olive
LOC111388424	0.676964	1.59877	0.00918853	0.0182001	XP_022868889.1	kinesin-like_protein_KIN-5C	Olive
LOC111403103	1.50305	2.83441	3.16e-06	1.04e-05	XP_022887250.1	kinesin-like_protein_KIN-5C	Olive
LOC111404047	2.11649	4.33639	8.48e-29	1.08e-27	XP_022888530.1	kinesin-like_protein_KIN-5C	Olive
LOC111374161	1.84256	3.58647	1.49e-08	6.29e-08	XP_022852560.1	kinesin-like_protein_KIN-5D	Olive
LOC111407720	0.441105	1.35764	0.0106522	0.0207992	XP_022893129.1	kinesin-like_protein_KIN-5D	Olive
LOC111369640	0.771625	1.70719	0.000121057	0.000325963	XP_022847002.1	kinesin-like_protein_KIN-5D,_transcript_variant_X2	Olive
LOC111371363	1.40387	2.6461	1.14e-13	7.03e-13	XP_022849071.1	kinesin-like_protein_KIN-5D,_transcript_variant_X2	Olive
LOC111389721	1.9473	3.85652	2.79e-07	1.04e-06	XP_022870433.1	kinesin-like_protein_KIN-7D,_mitochondrial,_transcript_variant_X2	Olive
LOC111410085	1.16526	2.24274	9.26e-17	6.84e-16	XP_022896035.1	kinesin-like_protein_KIN-7D,_mitochondrial,_transcript_variant_X2	Olive
LOC111374916	0.80357	1.74541	3.89e-08	1.58e-07	XP_022853442.1	kinesin-like_protein_KIN-7D,_mitochondrial,_transcript_variant_X6	Olive
LOC111385588	0.837607	1.78708	0.0002547	0.000654878	XP_022865764.1	kinesin-like_protein_KIN-7E,_chloroplastic,_transcript_variant_X2	Olive
LOC111375100	1.27395	2.41822	1.61e-05	4.86e-05	XP_022853658.1	kinesin-like_protein_KIN-7K,_chloroplastic	Olive
LOC111383794	0.820595	1.76613	7.61e-06	2.4e-05	XP_022863727.1	kinesin-like_protein_KIN-7K,_chloroplastic,_transcript_variant_X2	Olive
LOC111401377	2.57961	5.97776	1.1e-12	6.36e-12	XP_022884851.1	kinesin-like_protein_KIN-7N	Olive
LOC111399892	1.13674	2.19883	0.000228361	0.000591588	XP_022883144.1	kinesin-like_protein_KIN-7O	Olive
LOC111372120	2.30758	4.95052	1.57e-15	1.08e-14	XP_022850069.1	kinesin-like_protein_KIN-8A	Olive
LOC111380424	0.987822	1.98319	2.41e-06	8.1e-06	XP_022859753.1	kinesin-like_protein_KIN-8B,_transcript_variant_X3	Olive
LOC111393972	1.39911	2.63738	1.8e-11	9.59e-11	XP_022875534.1	kinesin-like_protein_KIN-UA	Olive
LOC111410817	0.659844	1.57991	0.000890448	0.00210818	XP_022897148.1	kinesin-like_protein_KIN-UB,_transcript_variant_X6	Olive
LOC111377815	2.96633	7.81546	4.45e-42	8.65e-41	XP_022856710.1	kinesin-like_protein_NACK1,_transcript_variant_X2	Olive
LOC111387114	2.14801	4.43217	3.73e-09	1.66e-08		kinesin-like_protein_NACK2	Olive
LOC111411000	0.906157	1.87405	1.15e-05	3.54e-05	XP_022897350.1	mitochondrial_Rho_GTPase_1-like	Olive
LOC111411184	0.939899	1.91839	5.19e-06	1.67e-05	XP_022897509.1	mitochondrial_Rho_GTPase_1-like	Olive
LOC111379630	1.03227	2.04524	6.36e-13	3.74e-12	XP_022858815.1	transmembrane_GTPase_FZO-like,_chloroplastic,_transcript_variant_X2	Olive
LOC111402405	0.522171	1.43611	0.0181359	0.0336698	XP_022886468.1	protein_KINESIN_LIGHT_CHAIN-RELATED_1-like,_transcript_variant_X2	Olive
LOC111396930	1.9727	3.92503	1.45e-10	7.22e-10	XP_022879314.1	protein_KINESIN_LIGHT_CHAIN-RELATED_2-like	Olive
LOC111374001	0.495082	1.4094	0.000545062	0.0013321	XP_022852370.1	putative_SWI/SNF-related_matrix-associated_actin-dependent_regulator_of_chromatin_subfamily_A_member_3-like_1	Olive
LOC111367077	1.43691	2.70741	4.82e-10	2.31e-09	XP_022843546.1	rac-like_GTP-binding_protein_5	Olive
LOC111392164	0.458079	1.37371	0.000626499	0.00151778	XP_022873198.1	rac-like_GTP-binding_protein_5	Olive
LOC111410525	0.807051	1.74963	0.00138339	0.0031712	XP_022896678.1	rac-like_GTP-binding_protein_ARAC3	Olive
LOC111411069	1.37267	2.5895	2.14e-06	7.25e-06	XP_022897411.1	rac-like_GTP-binding_protein_ARAC7	Olive
LOC111366378	3.14872	8.86868	5e-30	6.6e-29	XP_022842923.1	rac-like_GTP-binding_protein_ARAC7,_transcript_variant_X2	Olive
LOC111382666	1.79641	3.47355	3.02e-10	1.47e-09	XP_022862466.1	rac-like_GTP-binding_protein_RHO1,_transcript_variant_X2	Olive
LOC111396700	0.302639	1.2334	0.0132983	0.0254486	XP_022878933.1	RAN_GTPase-activating_protein_2-like,_transcript_variant_X3	Olive
LOC111378926	1.5089	2.84592	9.1e-26	1.02e-24	XP_022857986.1	RAN_GTPase-activating_protein_2-like,_transcript_variant_X7	Olive
LOC111400923	1.14493	2.21135	6.43e-09	2.81e-08	XP_022884163.1	ras_GTPase-activating_protein-binding_protein_2-like,_transcript_variant_X2	Olive
LOC111380688	0.33495	1.26133	0.00555942	0.0114789	XP_022860086.1	ras_GTPase-activating_protein-binding_protein_2-like,_transcript_variant_X3	Olive
LOC111370504	1.16125	2.2365	4.26e-06	1.39e-05	XP_022847990.1	ras-related_protein_RABA1c	Olive
LOC111412153	1.01645	2.02293	2.61e-09	1.18e-08	XP_022898711.1	ras-related_protein_RABA1d-like	Olive
LOC111382931	0.924548	1.89809	7.77e-08	3.06e-07	XP_022862741.1	ras-related_protein_RABA1f	Olive
LOC111371909	1.24447	2.36931	3.17e-06	1.05e-05	XP_022849829.1	ras-related_protein_RABA1f-like	Olive
LOC111392921	0.852766	1.80596	0.00147401	0.00336107	XP_022874102.1	ras-related_protein_RABA1f-like	Olive
LOC111397833	0.737093	1.66681	0.000372895	0.000934905	XP_022880576.1	ras-related_protein_RABA1f-like	Olive
LOC111381327	2.15153	4.44298	7.57e-45	1.6e-43	XP_022860877.1	ras-related_protein_RABA3	Olive
LOC111371292	0.738037	1.6679	0.00280755	0.00610504	XP_022848959.1	ras-related_protein_RABA5b-like	Olive
LOC111393762	0.826941	1.77392	0.00147997	0.00337329	XP_022875222.1	ras-related_protein_RABA5b-like,_transcript_variant_X2	Olive
LOC111396665	0.563147	1.47749	0.00141227	0.00323169	XP_022878882.1	ras-related_protein_RABA5c-like	Olive
LOC111372135	0.783667	1.7215	0.00188867	0.00423086	XP_022850088.1	ras-related_protein_RABA6b-like	Olive
LOC111400809	1.00339	2.00471	1.69e-05	5.09e-05	XP_022883988.1	ras-related_protein_RABB1b-like	Olive
LOC111388918	0.628316	1.54576	1.7e-06	5.83e-06	XP_022869515.1	ras-related_protein_RABE1c-like,_transcript_variant_X6	Olive
LOC111404177	2.13057	4.37889	2.24e-09	1.02e-08	XP_022888712.1	reticulon-like_protein_B12,_transcript_variant_X2	Olive
LOC111379521	3.14088	8.82063	1.32e-50	3.22e-49	XP_022858682.1	reticulon-like_protein_B17,_transcript_variant_X4	Olive
LOC111403768	2.83766	7.14861	3.55e-46	7.77e-45	XP_022888156.1	reticulon-like_protein_B21,_transcript_variant_X3	Olive
LOC111402970	1.56586	2.96054	3.51e-41	6.64e-40	XP_022887073.1	reticulon-like_protein_B4	Olive
LOC111396782	0.528426	1.44235	0.00198835	0.00443967	XP_022879060.1	rho_GDP-dissociation_inhibitor_1-like	Olive
LOC111395168	1.22187	2.33248	1.15e-12	6.64e-12	XP_022876941.1	rho_GTPase-activating_protein_2-like	Olive
LOC111405750	3.07943	8.45282	6.58e-45	1.39e-43	XP_022890541.1	rho_GTPase-activating_protein_2-like	Olive
LOC111379577	0.955823	1.93969	0.00324852	0.00697556	XP_022858746.1	rho_GTPase-activating_protein_3-like	Olive
LOC111385743	1.40559	2.64926	5.06e-06	1.63e-05	XP_022865929.1	rho_GTPase-activating_protein_3-like	Olive
LOC111373160	0.447477	1.36365	0.00405627	0.00858127	XP_022851412.1	rho_GTPase-activating_protein_5-like	Olive
LOC111412547	1.53106	2.88998	2.17e-14	1.4e-13	XP_022899251.1	rho_GTPase-activating_protein_5-like	Olive
LOC111407320	2.35908	5.13044	3.62e-21	3.32e-20	XP_022892504.1	rho_GTPase-activating_protein_6-like	Olive
LOC111411907	0.789697	1.72871	4.19e-06	1.36e-05	XP_022898333.1	rho_GTPase-activating_protein_7-like,_transcript_variant_X2	Olive
LOC111377570	0.502142	1.41631	2.47e-05	7.3e-05	XP_022856469.1	rho_GTPase-activating_protein_7-like,_transcript_variant_X3	Olive
LOC111392503	1.2102	2.3137	3.1e-23	3.13e-22	XP_022873631.1	rho-N_domain-containing_protein_1,_chloroplastic-like	Olive
LOC111377265	1.318	2.49321	0.000573232	0.00139678	XP_022856106.1	small_GTPase_LIP1-like	Olive
LOC111393463	0.767473	1.70229	3.88e-06	1.27e-05	XP_022874765.1	small_ribosomal_subunit_biogenesis_GTPase_RsgA_1,_mitochondrial	Olive
LOC111377904	1.70038	3.24987	0.000124554	0.000334761		SNARE-interacting_protein_KEULE-like	Olive
LOC111386566	2.03082	4.08638	2.19e-06	7.39e-06	XP_022866799.1	SNARE-interacting_protein_KEULE-like	Olive
LOC111389772	1.82552	3.54435	2.14e-06	7.25e-06	XP_022870504.1	SNARE-interacting_protein_KEULE-like	Olive
LOC111411664	0.769755	1.70498	2.15e-06	7.29e-06	XP_022897985.1	stomatal_closure-related_actin-binding_protein_1	Olive
LOC111365228	2.70278	6.51053	3.65e-32	5.23e-31	XP_022841409.1	stomatal_closure-related_actin-binding_protein_2-like	Olive
LOC111369104	0.795904	1.73617	0.000810742	0.00193239	XP_022846358.1	stomatal_closure-related_actin-binding_protein_2-like,_transcript_variant_X2	Olive
LOC111373097	0.45889	1.37448	0.0125592	0.0241788		SWI/SNF-related_matrix-associated_actin-dependent_regulator_of_chromatin_subfamily_A-like_protein_1_homolog	Olive
LOC111391784	2.1693	4.49805	2.96e-18	2.35e-17	XP_022872815.1	syntaxin-112-like	Olive
LOC111383599	2.10102	4.29013	1.65e-10	8.2e-10	XP_022863481.1	syntaxin-related_protein_KNOLLE-like	Olive
LOC111393679	2.80617	6.99423	5.11e-50	1.24e-48	XP_022875104.1	syntaxin-related_protein_KNOLLE-like	Olive
LOC111407692	0.629251	1.54676	6.12e-05	0.000172009	XP_022893098.1	TBC1_domain_family_member_2B-like,_transcript_variant_X3	Olive
LOC111382387	0.560471	1.47475	0.00910661	0.0180591	XP_022862112.1	TBC1_domain_family_member_2B-like,_transcript_variant_X4	Olive
LOC111367783	0.406189	1.32518	0.012017	0.0232333	XP_022844613.1	trihelix_transcription_factor_GT-2-like	Olive
LOC111408889	0.637361	1.55548	0.0216407	0.0395306	XP_022894488.1	tRNA_modification_GTPase_MnmE,_transcript_variant_X3	Olive
LOC111387687	1.32876	2.51186	7.59e-26	8.52e-25	XP_022868031.1	tubulin_alpha_chain	Olive
LOC111377146	1.61913	3.07189	6.3e-54	1.68e-52	XP_022855974.1	tubulin_alpha_chain-like	Olive
LOC111368482	0.946033	1.92657	2.08e-06	7.05e-06	XP_022845504.1	tubulin_beta_chain-like	Olive
LOC111407570	0.664502	1.58502	0.00351674	0.00751551	XP_022892908.1	tubulin_beta_chain-like	Olive
LOC111387259	2.35347	5.11054	6.86e-90	3.59e-88	XP_022867570.1	tubulin_beta-1_chain	Olive
LOC111406684	3.10101	8.58017	1.24e-98	7.31e-97	XP_022891837.1	tubulin_beta-1_chain	Olive
LOC111399979	1.49904	2.82654	1.91e-31	2.67e-30	XP_022883229.1	tubulin_beta-2_chain	Olive
LOC111368488	1.37274	2.58962	2.84e-22	2.75e-21	XP_022845513.1	tubulin_beta-2_chain-like	Olive
LOC111383090	1.57884	2.98729	1.14e-48	2.67e-47	XP_022862927.1	tubulin_beta-8_chain-like	Olive
LOC111399515	0.906651	1.87469	5.59e-12	3.08e-11	XP_022882650.1	tubulin_gamma-1_chain	Olive
LOC111367078	0.917373	1.88867	1.94e-05	5.79e-05	XP_022843547.1	tubulin-folding_cofactor_A	Olive
LOC111392803	0.448984	1.36508	0.00218761	0.00485108	XP_022873965.1	tubulin-folding_cofactor_D,_transcript_variant_X2	Olive
LOC111402306	0.428454	1.34579	0.011499	0.0223159	XP_022886291.1	tubulin-folding_cofactor_E,_transcript_variant_X2	Olive
LOC111368618	0.469077	1.38422	0.00236363	0.00520981	XP_022845738.1	tubulin--tyrosine_ligase-like_protein_12	Olive
LOC111393570	0.624193	1.54135	0.00933902	0.0184677	XP_022874954.1	vesicle_transport_protein_SFT2B,_transcript_variant_X3	Olive
LOC111393602	0.604202	1.52014	0.0235637	0.0425853	XP_022874984.1	vesicle-associated_membrane_protein_724-like	Olive
LOC111371473	0.597608	1.51321	0.000649292	0.00156994	XP_022849258.1	vesicle-associated_protein_2-2,_transcript_variant_X4	Olive
LOC111370612	0.440922	1.35747	0.00582081	0.0119753	XP_022848174.1	vesicle-associated_protein_4-2-like	Olive
P14 vs. P0_UP

## Sheet: P14 vs. P0_DOWN
P14 vs. P0_DOWN
Genes	log2FoldChange	FoldChange	pvalue	padj	Gene_ID	description	Organism
LOC111407289	-0.28455	-1.21803	0.0143707	0.0273145	XP_022892456.1	potassium_transporter_10-like,_transcript_variant_X2	Olive
LOC111371618	-0.290136	-1.22276	0.0246356	0.0443177		LOW_QUALITY_PROTEIN:_ABC_transporter_C_family_member_5	Olive
LOC111366051	-0.300392	-1.23148	0.0234629	0.0424236	XP_022842465.1	sodium/hydrogen_exchanger_1-like,_transcript_variant_X3	Olive
LOC111395700	-0.353425	-1.27759	0.00844073	0.0168319	XP_022877588.1	cyclic_nucleotide-gated_ion_channel_4-like	Olive
LOC111398958	-0.357445	-1.28115	0.0113687	0.0220904	XP_022881906.1	ABC_transporter_G_family_member_21-like	Olive
LOC111370950	-0.364185	-1.28715	0.013725	0.0262026	XP_022848628.1	calcium_permeable_stress-gated_cation_channel_1-like,_transcript_variant_X5	Olive
LOC111403381	-0.372097	-1.29423	0.00156208	0.00354746	XP_022887638.1	inorganic_phosphate_transporter_2-1,_chloroplastic-like	Olive
LOC111400858	-0.379737	-1.3011	0.00880043	0.0174973	XP_022884069.1	zinc_transporter_5	Olive
LOC111390112	-0.38321	-1.30424	0.00502689	0.0104661	XP_022870874.1	calcium-transporting_ATPase_1-like	Olive
LOC111390112	-0.38321	-1.30424	0.00502689	0.0104661	XP_022870874.1	calcium-transporting_ATPase_1-like	Olive
LOC111395509	-0.39143	-1.31169	0.0263054	0.0469699	XP_022877297.1	sugar_phosphate/phosphate_translocator_At1g06470,_transcript_variant_X2	Olive
LOC111366335	-0.393176	-1.31328	0.0031963	0.00686956	XP_022842851.1	organic_cation/carnitine_transporter_7-like,_transcript_variant_X5	Olive
LOC111411731	-0.397755	-1.31746	0.000839694	0.00199659	XP_022898081.1	potassium_transporter_7-like,_transcript_variant_X2	Olive
LOC111367512	-0.398065	-1.31774	0.00176312	0.00396837	XP_022844201.1	mechanosensitive_ion_channel_protein_2,_chloroplastic-like,_transcript_variant_X5	Olive
LOC111385933	-0.405452	-1.3245	0.0153183	0.0289323	XP_022866125.1	mitochondrial_adenine_nucleotide_transporter_ADNT1-like	Olive
LOC111384337	-0.413695	-1.33209	0.0217853	0.0397667	XP_022864374.1	CMP-sialic_acid_transporter_3-like,_transcript_variant_X2	Olive
LOC111395849	-0.414052	-1.33242	0.0149849	0.0283441	XP_022877808.1	chloride_channel_protein_CLC-f-like	Olive
LOC111376075	-0.421123	-1.33897	0.0124834	0.0240452	XP_022854771.1	metal_transporter_Nramp3-like	Olive
LOC111402402	-0.423659	-1.34132	0.0206677	0.0378953	XP_022886447.1	two-pore_potassium_channel_1-like,_transcript_variant_X2	Olive
LOC111393633	-0.428705	-1.34602	0.00139145	0.00318708	XP_022875036.1	ammonium_transporter_1_member_1-like	Olive
LOC111400935	-0.435246	-1.35214	1.99e-05	5.95e-05	XP_022884179.1	dicarboxylate_transporter_1,_chloroplastic-like	Olive
LOC111408636	-0.435852	-1.35271	0.0280492	0.0497637		vacuolar_cation/proton_exchanger_3-like	Olive
LOC111379112	-0.439283	-1.35593	0.00284995	0.00619045	XP_022858213.1	glucose-6-phosphate/phosphate_translocator_1,_chloroplastic-like	Olive
LOC111397731	-0.441472	-1.35799	8.59e-05	0.000237004	XP_022880503.1	potassium_transporter_2-like,_transcript_variant_X3	Olive
LOC111408788	-0.452691	-1.36859	0.000653041	0.00157833	XP_022894324.1	cyclic_nucleotide-gated_ion_channel_1-like	Olive
LOC111369844	-0.466567	-1.38182	5.3e-05	0.000150197	XP_022847301.1	ABC_transporter_C_family_member_14-like,_transcript_variant_X2	Olive
LOC111370486	-0.480767	-1.39549	4.93e-05	0.000140439	XP_022847973.1	cation-chloride_cotransporter_1	Olive
LOC111390214	-0.483626	-1.39825	0.000327666	0.000828925	XP_022870989.1	amino_acid_transporter_AVT6A-like,_transcript_variant_X2	Olive
LOC111371279	-0.487798	-1.4023	0.00228023	0.00504084	XP_022848946.1	metal-nicotianamine_transporter_YSL6	Olive
LOC111397313	-0.493698	-1.40805	0.00105742	0.00246994	XP_022879930.1	nucleobase-ascorbate_transporter_3	Olive
LOC111365643	-0.495237	-1.40955	0.00242229	0.00532792	XP_022841951.1	sugar_phosphate/phosphate_translocator_At5g25400	Olive
LOC111400494	-0.497231	-1.4115	6.24e-05	0.000175217	XP_022883681.1	ABC_transporter_F_family_member_1,_transcript_variant_X2	Olive
LOC111369589	-0.497433	-1.4117	2.05e-05	6.13e-05	XP_022846945.1	phospholipid-transporting_ATPase_7,_transcript_variant_X2	Olive
LOC111405347	-0.49993	-1.41414	0.00677746	0.0137674	XP_022889943.1	organic_cation/carnitine_transporter_1	Olive
LOC111403773	-0.500975	-1.41517	0.00217131	0.00481811	XP_022888164.1	purine_permease_5,_transcript_variant_X3	Olive
LOC111392177	-0.503916	-1.41806	0.000387116	0.000968611	XP_022873246.1	calcium-binding_protein_CML13	Olive
LOC111412126	-0.504597	-1.41873	1.05e-05	3.25e-05	XP_022898671.1	rop_guanine_nucleotide_exchange_factor_1	Olive
LOC111396330	-0.50524	-1.41936	0.00095673	0.00225191	XP_022878506.1	sulfate_transporter_3.3	Olive
LOC111388858	-0.513241	-1.42725	6.55e-05	0.000183315	XP_022869437.1	zinc_transporter_At3g08650	Olive
LOC111367075	-0.518913	-1.43288	0.00346835	0.00742106	XP_022843544.1	cationic_amino_acid_transporter_9,_chloroplastic-like	Olive
LOC111379385	-0.535145	-1.44909	0.0205397	0.0376874	XP_022858512.1	calcium/calmodulin-regulated_receptor-like_kinase_1	Olive
LOC111369423	-0.538467	-1.45243	0.00103591	0.00242305	XP_022846704.1	membrane_magnesium_transporter	Olive
LOC111392346	-0.539991	-1.45396	4.34e-06	1.41e-05	XP_022873447.1	potassium_transporter_8-like,_transcript_variant_X2	Olive
LOC111372237	-0.54159	-1.45558	0.00446258	0.0093707	XP_022850235.1	UDP-rhamnose/UDP-galactose_transporter_6-like	Olive
LOC111368090	-0.545863	-1.45989	0.00818269	0.01636	XP_022845052.1	magnesium_transporter_NIPA8,_transcript_variant_X2	Olive
LOC111376356	-0.548946	-1.46302	0.00426115	0.00897462	XP_022855081.1	high_affinity_nitrate_transporter_2.5-like	Olive
LOC111381133	-0.549229	-1.4633	0.0036048	0.00769049	XP_022860643.1	magnesium_transporter_MRS2-11,_chloroplastic-like,_transcript_variant_X5	Olive
LOC111396687	-0.5511	-1.4652	0.00100575	0.00235842	XP_022878911.1	nicotinamide_adenine_dinucleotide_transporter_1,_chloroplastic-like	Olive
LOC111397198	-0.555381	-1.46956	0.000588778	0.00143259	XP_022879747.1	protein_phosphatase_2C_60,_transcript_variant_X4	Olive
LOC111391783	-0.559549	-1.47381	0.00148207	0.00337761	XP_022872813.1	calcium-binding_mitochondrial_carrier_protein_SCaMC-3-like,_transcript_variant_X6	Olive
LOC111408664	-0.566433	-1.48086	2.73e-05	8.03e-05	XP_022894166.1	WAT1-related_protein_At3g28050-like	Olive
LOC111405630	-0.568126	-1.4826	0.00032049	0.000812239	XP_022890362.1	plastid-lipid-associated_protein_14,_chloroplastic,_transcript_variant_X2	Olive
LOC111368041	-0.568222	-1.48269	0.000507578	0.00124665	XP_022844973.1	potassium_transporter_25-like	Olive
LOC111386290	-0.576036	-1.49075	4.13e-08	1.67e-07	XP_022866774.1	potassium_transporter_2-like,_transcript_variant_X5	Olive
LOC111403868	-0.578261	-1.49305	2.02e-05	6.04e-05	XP_022888272.1	calcium-binding_protein_CML49	Olive
LOC111396951	-0.585418	-1.50047	0.000111052	0.000300781	XP_022879355.1	calcium-binding_protein_CML13	Olive
LOC111394361	-0.588433	-1.50361	0.000328976	0.000831864	XP_022875900.1	amino_acid_permease_3-like	Olive
LOC111371472	-0.591191	-1.50649	0.00177052	0.00398343	XP_022849254.1	sodium/hydrogen_exchanger_1-like,_transcript_variant_X4	Olive
LOC111395677	-0.594381	-1.50982	0.0232599	0.0420997	XP_022877552.1	organic_cation/carnitine_transporter_4-like	Olive
LOC111393332	-0.603215	-1.5191	8.76e-07	3.09e-06	XP_022874592.1	ABC_transporter_F_family_member_4	Olive
LOC111370961	-0.607445	-1.52356	0.000799347	0.00190767	XP_022848650.1	sugar_phosphate/phosphate_translocator_At1g06470,_transcript_variant_X3	Olive
LOC111402953	-0.613779	-1.53026	0.00523756	0.0108677	XP_022887052.1	inorganic_phosphate_transporter_1-2-like	Olive
LOC111387932	-0.614047	-1.53055	0.00053374	0.00130633	XP_022868332.1	phospholipid-transporting_ATPase_3-like,_transcript_variant_X4	Olive
LOC111378077	-0.614272	-1.53079	0.00904829	0.0179572	XP_022857012.1	magnesium_transporter_MRS2-I-like,_transcript_variant_X2	Olive
LOC111398703	-0.630796	-1.54842	2.29e-05	6.8e-05	XP_022881513.1	cyclic_nucleotide-gated_ion_channel_14	Olive
LOC111382279	-0.633597	-1.55143	1.1e-09	5.11e-09	XP_022861964.1	inositol_transporter_1-like	Olive
LOC111410509	-0.633912	-1.55177	0.00180937	0.00406567	XP_022896642.1	serine/threonine-protein_kinase_PIX13	Olive
LOC111394346	-0.635407	-1.55338	1.51e-05	4.59e-05	XP_022875880.1	UDP-galactose_transporter_1-like	Olive
LOC111383205	-0.639665	-1.55797	0.00241026	0.00530285	XP_022863055.1	purine_permease_11	Olive
LOC111367756	-0.639831	-1.55815	2.17e-07	8.18e-07	XP_022844566.1	aluminum-activated_malate_transporter_4-like	Olive
LOC111407241	-0.640207	-1.55855	0.0117502	0.0227633	XP_022892373.1	purine_permease_10	Olive
LOC111399534	-0.642176	-1.56068	7.44e-11	3.79e-10	XP_022882670.1	polyol_transporter_1	Olive
LOC111387524	-0.647177	-1.5661	0.00051438	0.00126252	XP_022867861.1	copper-transporting_ATPase_RAN1-like	Olive
LOC111366189	-0.651684	-1.571	0.00107321	0.00250403	XP_022842653.1	mitochondrial_arginine_transporter_BAC2-like	Olive
LOC111385443	-0.659134	-1.57913	1.54e-08	6.52e-08	XP_022865599.1	copper_transporter_5.1-like	Olive
LOC111380985	-0.659766	-1.57983	3.19e-09	1.43e-08	XP_022860438.1	pleiotropic_drug_resistance_protein_2-like,_transcript_variant_X2	Olive
LOC111412967	-0.670451	-1.59157	0.000321554	0.000814628	XP_022899590.1	cationic_amino_acid_transporter_2,_vacuolar-like	Olive
LOC111371686	-0.670815	-1.59197	9.97e-05	0.000272137	XP_022849581.1	folate-biopterin_transporter_1,_chloroplastic,_transcript_variant_X2	Olive
LOC111373637	-0.675926	-1.59762	1.68e-06	5.76e-06	XP_022851965.1	silicon_efflux_transporter_LSI2-like,_transcript_variant_X4	Olive
LOC111387636	-0.680527	-1.60273	0.00199271	0.00444822		ABC_transporter_C_family_member_5-like	Olive
LOC111401179	-0.687918	-1.61096	5.16e-09	2.27e-08	XP_022884564.1	mechanosensitive_ion_channel_protein_2,_chloroplastic-like	Olive
LOC111368033	-0.692587	-1.61618	0.000196598	0.000513936	XP_022844965.1	ABC_transporter_A_family_member_7-like	Olive
LOC111405567	-0.698556	-1.62288	1.83e-06	6.27e-06	XP_022890281.1	calcium-binding_protein_CML13	Olive
LOC111395940	-0.707073	-1.63249	7.52e-07	2.68e-06	XP_022877941.1	calcium_permeable_stress-gated_cation_channel_1-like	Olive
LOC111408767	-0.707152	-1.63258	3.24e-05	9.43e-05	XP_022894309.1	nuclear_transport_factor_2B-like	Olive
LOC111377167	-0.712276	-1.63839	2.86e-07	1.07e-06	XP_022855990.1	ABC_transporter_G_family_member_14-like	Olive
LOC111402277	-0.718887	-1.64591	3.77e-07	1.39e-06	XP_022886219.1	cation/calcium_exchanger_4	Olive
LOC111392163	-0.722459	-1.64999	3.74e-05	0.000107972	XP_022873197.1	ABC_transporter_B_family_member_13-like,_transcript_variant_X2	Olive
LOC111395673	-0.726465	-1.65458	0.0143159	0.0272241	XP_022877548.1	calcium/calmodulin-regulated_receptor-like_kinase_1,_transcript_variant_X5	Olive
LOC111383879	-0.727701	-1.656	0.0014191	0.00324593	XP_022863829.1	magnesium_transporter_NIPA6	Olive
LOC111381300	-0.73253	-1.66155	2.6e-12	1.47e-11	XP_022860840.1	high_affinity_nitrate_transporter_2.7	Olive
LOC111403345	-0.740701	-1.67099	2.9e-08	1.19e-07	XP_022887579.1	potassium_transporter_6-like,_transcript_variant_X5	Olive
LOC111369291	-0.742061	-1.67256	9.25e-05	0.000253659	XP_022846517.1	nuclear_transport_factor_2B-like	Olive
LOC111380031	-0.744347	-1.67522	7.42e-12	4.06e-11	XP_022859262.1	phospholipid-transporting_ATPase_1-like,_transcript_variant_X4	Olive
LOC111393563	-0.745227	-1.67624	4.15e-13	2.47e-12	XP_022874923.1	potassium_transporter_4-like,_transcript_variant_X3	Olive
LOC111396895	-0.745377	-1.67641	0.00570685	0.0117559	XP_022879260.1	sodium/hydrogen_exchanger_5-like	Olive
LOC111407457	-0.75001	-1.6818	0.000366921	0.000920682	XP_022892707.1	copper_transporter_5-like	Olive
LOC111393325	-0.751086	-1.68306	1.06e-08	4.54e-08	XP_022874578.1	ABC_transporter_C_family_member_5-like	Olive
LOC111370783	-0.768174	-1.70311	1.94e-05	5.81e-05	XP_022848415.1	cationic_amino_acid_transporter_9,_chloroplastic	Olive
LOC111395829	-0.770807	-1.70622	2.8e-07	1.04e-06	XP_022877777.1	zinc_transporter_11-like	Olive
LOC111379505	-0.778243	-1.71504	0.000469904	0.00115945	XP_022858658.1	calcium-binding_protein_CML48,_transcript_variant_X2	Olive
LOC111366216	-0.783064	-1.72078	0.00843715	0.0168268	XP_022842696.1	amino_acid_transporter_AVT1C,_transcript_variant_X3	Olive
LOC111380798	-0.784292	-1.72225	4.84e-06	1.56e-05	XP_022860212.1	UDP-galactose_transporter_1-like,_transcript_variant_X2	Olive
LOC111382395	-0.785387	-1.72356	0.000603513	0.0014661	XP_022862128.1	WAT1-related_protein_At4g01440-like,_transcript_variant_X2	Olive
LOC111408670	-0.787914	-1.72658	2.85e-12	1.6e-11	XP_022894173.1	ABC_transporter_F_family_member_5	Olive
LOC111389749	-0.790497	-1.72967	1.4e-05	4.26e-05	XP_022870470.1	protein_ABC_transporter_1,_mitochondrial	Olive
LOC111390775	-0.791145	-1.73045	0.00140481	0.00321593	XP_022871652.1	oligopeptide_transporter_4-like	Olive
LOC111373741	-0.791493	-1.73086	0.00482042	0.0100687	XP_022852097.1	protein_TRIGALACTOSYLDIACYLGLYCEROL_3,_chloroplastic-like	Olive
LOC111367539	-0.793572	-1.73336	8.87e-13	5.15e-12	XP_022844245.1	ABC_transporter_G_family_member_11-like	Olive
LOC111412387	-0.794769	-1.7348	4.06e-08	1.64e-07	XP_022899066.1	magnesium/proton_exchanger,_transcript_variant_X4	Olive
LOC111411592	-0.797013	-1.7375	0.0264234	0.0471479	XP_022897865.1	sodium_channel_modifier_1-like	Olive
LOC111368487	-0.809088	-1.7521	8.27e-06	2.6e-05	XP_022845512.1	copper-transporting_ATPase_HMA5,_transcript_variant_X3	Olive
LOC111368487	-0.809088	-1.7521	8.27e-06	2.6e-05	XP_022845512.1	copper-transporting_ATPase_HMA5,_transcript_variant_X3	Olive
LOC111407902	-0.811418	-1.75494	6.82e-05	0.000190492	XP_022893379.1	plastidic_glucose_transporter_2,_transcript_variant_X5	Olive
LOC111407329	-0.816499	-1.76113	0.0100556	0.0197524	XP_022892514.1	two_pore_calcium_channel_protein_1A-like	Olive
LOC111381595	-0.823621	-1.76984	0.0152143	0.0287536	XP_022861159.1	protein_CNGC15b-like	Olive
LOC111377905	-0.824065	-1.77039	0.000481495	0.00118622	XP_022856822.1	hexose_carrier_protein_HEX6-like	Olive
LOC111380244	-0.825107	-1.77167	0.000153724	0.000408075	XP_022859519.1	nicotinate-nucleotide_pyrophosphorylase_[carboxylating],_chloroplastic,_transcript_variant_X2	Olive
LOC111367323	-0.831137	-1.77909	1.89e-06	6.44e-06	XP_022843902.1	aquaporin_NIP5-1	Olive
LOC111409070	-0.832271	-1.78049	0.000576527	0.0014041	XP_022894739.1	CMP-sialic_acid_transporter_5-like	Olive
LOC111393932	-0.832706	-1.78102	0.000818183	0.0019493	XP_022875488.1	ABC_transporter_G_family_member_14-like	Olive
LOC111410006	-0.836623	-1.78587	5.68e-09	2.49e-08	XP_022895929.1	sugar_transport_protein_14	Olive
LOC111395874	-0.839295	-1.78918	0.00515401	0.0107091	XP_022877843.1	organic_cation/carnitine_transporter_3-like	Olive
LOC111392248	-0.854775	-1.80848	0.00015231	0.00040445	XP_022873303.1	SEC1_family_transport_protein_SLY1-like	Olive
LOC111382409	-0.874422	-1.83327	1.42e-07	5.42e-07	XP_022862148.1	ABC_transporter_B_family_member_26,_chloroplastic,_transcript_variant_X2	Olive
LOC111405471	-0.881014	-1.84167	0.000112688	0.000304967	XP_022890136.1	sugar_phosphate/phosphate_translocator_At3g11320	Olive
LOC111401628	-0.884431	-1.84604	1.11e-06	3.88e-06	XP_022885220.1	ABC_transporter_A_family_member_2	Olive
LOC111370730	-0.894281	-1.85868	1.86e-10	9.22e-10	XP_022848344.1	chloride_channel_protein_CLC-f,_transcript_variant_X3	Olive
LOC111398318	-0.911328	-1.88078	3.07e-11	1.61e-10	XP_022881004.1	phospholipid-transporting_ATPase_3-like	Olive
LOC111412297	-0.91852	-1.89018	8.97e-12	4.88e-11	XP_022898938.1	CSC1-like_protein_At4g35870	Olive
LOC111393165	-0.929861	-1.90509	5.45e-06	1.75e-05	XP_022874326.1	serine/threonine-protein_kinase_PBL16	Olive
LOC111373054	-0.932174	-1.90815	6.14e-14	3.83e-13	XP_022851290.1	UDP-rhamnose/UDP-galactose_transporter_6-like,_transcript_variant_X2	Olive
LOC111374667	-0.932875	-1.90908	7.46e-09	3.24e-08	XP_022853144.1	copper-transporting_ATPase_HMA4-like	Olive
LOC111381530	-0.935477	-1.91252	1.14e-05	3.51e-05	XP_022861087.1	calcium-binding_protein_CML30	Olive
LOC111372551	-0.938282	-1.91624	2.84e-11	1.49e-10	XP_022850670.1	UDP-rhamnose/UDP-galactose_transporter_2	Olive
LOC111400554	-0.94503	-1.92523	1.74e-05	5.24e-05	XP_022883728.1	metal_transporter_Nramp3-like	Olive
LOC111410518	-0.946153	-1.92673	0.00068469	0.00164795	XP_022896669.1	folate-biopterin_transporter_7,_transcript_variant_X3	Olive
LOC111388608	-0.950402	-1.93241	4.9e-14	3.08e-13	XP_022869132.1	polyol_transporter_4	Olive
LOC111392087	-0.953544	-1.93662	6.01e-14	3.76e-13	XP_022873133.1	inositol_transporter_1-like,_transcript_variant_X2	Olive
LOC111408380	-0.962644	-1.94888	9.28e-07	3.27e-06	XP_022893913.1	calcium_uptake_protein,_mitochondrial-like	Olive
LOC111365808	-0.963626	-1.95021	0.00302533	0.00653509	XP_022842094.1	copper_transporter_6-like	Olive
LOC111412213	-0.963851	-1.95051	4.06e-07	1.49e-06	XP_022898809.1	two-pore_potassium_channel_3-like	Olive
LOC111412426	-0.967757	-1.9558	1.37e-14	8.98e-14	XP_022899122.1	magnesium_transporter_MRS2-3-like	Olive
LOC111370701	-0.976032	-1.96705	3.76e-12	2.1e-11	XP_022848307.1	zinc_transporter_1-like	Olive
LOC111382450	-0.976928	-1.96827	6.76e-06	2.15e-05	XP_022862196.1	protein_phosphatase_2C_59,_transcript_variant_X2	Olive
LOC111376330	-0.979442	-1.9717	4.26e-06	1.38e-05		UDP-xylose_transporter_1-like	Olive
LOC111407877	-0.984675	-1.97887	9.38e-05	0.00025696	XP_022893341.1	ABC_transporter_B_family_member_8,_transcript_variant_X3	Olive
LOC111387877	-0.987697	-1.98302	3.49e-08	1.42e-07	XP_022868240.1	metal_transporter_Nramp2-like	Olive
LOC111403116	-0.988961	-1.98475	0.00169886	0.00383272	XP_022887271.1	membrane_magnesium_transporter-like	Olive
LOC111408119	-0.990126	-1.98636	1.16e-10	5.81e-10	XP_022893683.1	ABC_transporter_B_family_member_2-like,_transcript_variant_X2	Olive
LOC111391101	-1.00211	-2.00293	2.43e-18	1.94e-17	XP_022872020.1	calcium_load-activated_calcium_channel-like	Olive
LOC111379280	-1.00359	-2.00499	5.99e-20	5.19e-19	XP_022858404.1	SEC1_family_transport_protein_SLY1-like	Olive
LOC111379333	-1.018	-2.02511	6.89e-14	4.29e-13	XP_022858458.1	protein_EXORDIUM-like_2	Olive
LOC111391866	-1.0187	-2.0261	0.0016838	0.00380103	XP_022872910.1	sodium/hydrogen_exchanger_2-like	Olive
LOC111403870	-1.02032	-2.02837	3.01e-05	8.79e-05	XP_022888273.1	UDP-URONIC_ACID_TRANSPORTER_1-like	Olive
LOC111384217	-1.02274	-2.03177	2.09e-12	1.19e-11	XP_022864246.1	phospholipid-transporting_ATPase_1-like	Olive
LOC111375898	-1.03153	-2.04419	5.41e-10	2.58e-09	XP_022854581.1	chloride_channel_protein_CLC-c-like	Olive
LOC111392249	-1.03157	-2.04425	0.00319711	0.00687085	XP_022873305.1	SEC1_family_transport_protein_SLY1-like	Olive
LOC111372219	-1.04712	-2.0664	5.44e-05	0.000154102	XP_022850212.1	vacuolar_iron_transporter_homolog_2-like	Olive
LOC111372341	-1.05267	-2.07437	0.00147637	0.00336577	XP_022850400.1	zinc_transporter_5-like	Olive
LOC111407626	-1.05328	-2.07524	0.00625712	0.0127993	XP_022893008.1	high-affinity_nitrate_transporter_3.1-like	Olive
LOC111367666	-1.05347	-2.07551	7.03e-15	4.67e-14	XP_022844425.1	phospholipid-transporting_ATPase_4	Olive
LOC111367666	-1.05347	-2.07551	7.03e-15	4.67e-14	XP_022844425.1	phospholipid-transporting_ATPase_4	Olive
LOC111370498	-1.05794	-2.08195	2.14e-25	2.37e-24	XP_022847982.1	CSC1-like_protein_ERD4	Olive
LOC111366092	-1.06048	-2.08563	1.57e-09	7.22e-09	XP_022842514.1	cation/calcium_exchanger_4-like	Olive
LOC111376140	-1.06743	-2.0957	9.76e-06	3.04e-05	XP_022854850.1	amino_acid_transporter_AVT1J-like	Olive
LOC111395605	-1.07648	-2.10889	1.12e-15	7.76e-15	XP_022877456.1	sucrose_transport_protein_SUC3,_transcript_variant_X2	Olive
LOC111407992	-1.08313	-2.11862	1.02e-08	4.37e-08	XP_022893499.1	CMP-sialic_acid_transporter_5-like	Olive
LOC111411912	-1.08716	-2.12456	9.99e-06	3.11e-05	XP_022898347.1	GDP-mannose_transporter_GONST1-like,_transcript_variant_X3	Olive
LOC111407930	-1.09484	-2.1359	2.92e-07	1.09e-06	XP_022893423.1	equilibrative_nucleotide_transporter_8-like	Olive
LOC111378274	-1.09621	-2.13792	0.0174317	0.0324967	XP_022857239.1	copper_transport_protein_ATX1-like	Olive
LOC111406124	-1.10069	-2.14457	1.16e-20	1.03e-19	XP_022891109.1	ABC_transporter_C_family_member_10-like,_transcript_variant_X4	Olive
LOC111374688	-1.10292	-2.14789	1.76e-13	1.07e-12	XP_022853168.1	cationic_amino_acid_transporter_2,_vacuolar-like	Olive
LOC111373701	-1.10411	-2.14967	3.56e-08	1.45e-07	XP_022852050.1	calcium-binding_mitochondrial_carrier_protein_SCaMC-1-like	Olive
LOC111376002	-1.10587	-2.15229	1.35e-12	7.76e-12	XP_022854699.1	nicotinamide_adenine_dinucleotide_transporter_1,_chloroplastic-like	Olive
LOC111397801	-1.10946	-2.15765	1.94e-06	6.62e-06	XP_022880548.1	ABC_transporter_I_family_member_21-like	Olive
LOC111380725	-1.12755	-2.18488	4.29e-12	2.39e-11	XP_022860126.1	plasma_membrane_ATPase_4-like	Olive
LOC111380725	-1.12755	-2.18488	4.29e-12	2.39e-11	XP_022860126.1	plasma_membrane_ATPase_4-like	Olive
LOC111365410	-1.1391	-2.20243	4.3e-14	2.72e-13	XP_022841704.1	metal-nicotianamine_transporter_YSL6,_transcript_variant_X3	Olive
LOC111369673	-1.14273	-2.20799	2.35e-12	1.33e-11	XP_022847044.1	copper_transporter_6-like	Olive
LOC111389085	-1.14699	-2.21451	0.000722007	0.00173231	XP_022869708.1	zinc_transporter_10	Olive
LOC111399650	-1.15466	-2.22632	2.68e-26	3.07e-25	XP_022882853.1	calcium-transporting_ATPase_11,_plasma_membrane-type,_transcript_variant_X2	Olive
LOC111405234	-1.15642	-2.22904	1.81e-19	1.53e-18	XP_022889805.1	calcium-binding_allergen_Ole_e_8-like	Olive
LOC111406275	-1.1635	-2.24001	1.3e-16	9.49e-16	XP_022891378.1	sulfate_transporter_3.4	Olive
LOC111396126	-1.16582	-2.24361	5.14e-20	4.46e-19	XP_022878207.1	ABC_transporter_C_family_member_15,_transcript_variant_X3	Olive
LOC111410745	-1.17638	-2.26009	1.21e-11	6.55e-11	XP_022897012.1	magnesium_transporter_NIPA4,_transcript_variant_X2	Olive
LOC111393836	-1.17782	-2.26234	4.56e-16	3.23e-15	XP_022875322.1	sulfate_transporter_1.3,_transcript_variant_X2	Olive
LOC111392609	-1.18172	-2.26847	3.99e-13	2.37e-12	XP_022873737.1	calcium_uptake_protein,_mitochondrial-like,_transcript_variant_X2	Olive
LOC111379029	-1.20495	-2.3053	7.33e-06	2.32e-05	XP_022858105.1	proteasome_inhibitor,_transcript_variant_X2	Olive
LOC111379180	-1.21186	-2.31637	2.45e-11	1.29e-10	XP_022858289.1	polyol_transporter_6	Olive
LOC111402045	-1.21341	-2.31885	5.34e-06	1.72e-05	XP_022885853.1	UDP-galactose_transporter_1-like	Olive
LOC111367043	-1.21482	-2.32111	7.25e-09	3.15e-08	XP_022843499.1	chloride_channel_protein_CLC-b-like	Olive
LOC111397297	-1.21678	-2.32427	9.5e-06	2.96e-05	XP_022879911.1	calcium_uniporter_protein_4,_mitochondrial-like	Olive
LOC111409582	-1.23987	-2.36177	3.65e-22	3.52e-21	XP_022895382.1	oligopeptide_transporter_4-like	Olive
LOC111399533	-1.24405	-2.36862	1.05e-30	1.42e-29	XP_022882669.1	polyol_transporter_1	Olive
LOC111397769	-1.24543	-2.37088	7.55e-08	2.97e-07	XP_022880519.1	CMP-sialic_acid_transporter_4-like	Olive
LOC111388123	-1.2476	-2.37447	4.49e-11	2.33e-10	XP_022868566.1	UDP-galactose/UDP-glucose_transporter_3-like	Olive
LOC111377624	-1.26292	-2.39981	6.23e-09	2.72e-08	XP_022856516.1	lysine_histidine_transporter_1-like	Olive
LOC111408460	-1.26352	-2.4008	1.37e-18	1.11e-17	XP_022893983.1	metal-nicotianamine_transporter_YSL1-like	Olive
LOC111373564	-1.27152	-2.41416	2.18e-08	9.05e-08	XP_022851881.1	magnesium_transporter_NIPA9	Olive
LOC111389363	-1.2906	-2.4463	9.89e-16	6.89e-15	XP_022870054.1	calcium_permeable_stress-gated_cation_channel_1-like	Olive
LOC111376479	-1.29145	-2.44773	2.28e-33	3.39e-32	XP_022855207.1	calcium-binding_protein_CML35	Olive
LOC111407250	-1.2916	-2.448	5.04e-11	2.6e-10	XP_022892398.1	sodium/calcium_exchanger_NCL2-like,_transcript_variant_X3	Olive
LOC111408058	-1.30954	-2.47862	4.5e-31	6.19e-30	XP_022893591.1	tonoplast_dicarboxylate_transporter	Olive
LOC111409831	-1.3269	-2.50862	1.43e-28	1.79e-27	XP_022895674.1	magnesium_transporter_MRS2-4	Olive
LOC111403417	-1.33573	-2.52402	3.14e-18	2.5e-17	XP_022887688.1	potassium_transporter_4-like,_transcript_variant_X2	Olive
LOC111401421	-1.36042	-2.56759	4.82e-28	5.96e-27	XP_022884912.1	calcium-binding_allergen_Ole_e_8	Olive
LOC111382003	-1.36647	-2.57838	1.04e-22	1.03e-21	XP_022861637.1	chloride_channel_protein_CLC-c-like,_transcript_variant_X2	Olive
LOC111388837	-1.37153	-2.58744	2.34e-06	7.87e-06	XP_022869416.1	potassium_channel_SKOR-like	Olive
LOC111387110	-1.41292	-2.66275	1.83e-21	1.7e-20	XP_022867397.1	ABC_transporter_G_family_member_15-like	Olive
LOC111384165	-1.4176	-2.67141	3.76e-06	1.23e-05	XP_022864186.1	triose_phosphate/phosphate_translocator,_non-green_plastid,_chloroplastic-like,_transcript_variant_X3	Olive
LOC111390426	-1.41953	-2.67499	0.000358756	0.000901878	XP_022871235.1	WAT1-related_protein_At5g64700-like,_transcript_variant_X2	Olive
LOC111392305	-1.44929	-2.73074	7.33e-31	9.97e-30	XP_022873387.1	amino_acid_permease_7,_transcript_variant_X2	Olive
LOC111405391	-1.45594	-2.74335	3.7e-23	3.73e-22	XP_022890015.1	sulfate_transporter_4.1,_chloroplastic-like,_transcript_variant_X2	Olive
LOC111407732	-1.46271	-2.75625	0.000670719	0.00161652	XP_022893145.1	copper_transport_protein_ATX1-like	Olive
LOC111401237	-1.4632	-2.75719	5.21e-30	6.87e-29	XP_022884652.1	amino_acid_transporter_AVT3B-like	Olive
LOC111370430	-1.47676	-2.78323	7.13e-25	7.7e-24	XP_022847893.1	potassium_transporter_11-like,_transcript_variant_X2	Olive
LOC111410880	-1.48233	-2.79399	2.02e-39	3.62e-38	XP_022897241.1	sugar_phosphate/phosphate_translocator_At4g32390	Olive
LOC111397090	-1.50436	-2.83698	5.95e-16	4.2e-15	XP_022879590.1	plasma_membrane_ATPase_1-like,_transcript_variant_X2	Olive
LOC111409991	-1.50498	-2.83821	2.9e-11	1.52e-10	XP_022895905.1	ABC_transporter_I_family_member_20	Olive
LOC111390302	-1.51327	-2.85457	3.06e-24	3.22e-23	XP_022871086.1	calcium-binding_protein_CML29	Olive
LOC111386823	-1.51984	-2.86759	1.32e-16	9.65e-16	XP_022867068.1	sugar_carrier_protein_A-like,_transcript_variant_X2	Olive
LOC111392327	-1.53665	-2.9012	3.42e-25	3.74e-24	XP_022873409.1	sodium/hydrogen_exchanger_1-like,_transcript_variant_X2	Olive
LOC111376034	-1.54128	-2.91053	1.37e-07	5.26e-07	XP_022854728.1	calcium-transporting_ATPase_12,_plasma_membrane-type-like	Olive
LOC111395847	-1.54803	-2.92417	7.39e-34	1.12e-32	XP_022877804.1	aquaporin_PIP2-5	Olive
LOC111393783	-1.54877	-2.92567	1.54e-14	1e-13	XP_022875254.1	CSC1-like_protein_RXW8,_transcript_variant_X2	Olive
LOC111411952	-1.55334	-2.93497	1.09e-41	2.09e-40	XP_022898415.1	calcium-binding_protein_KIC-like	Olive
LOC111384714	-1.56452	-2.95779	9.34e-07	3.28e-06	XP_022864809.1	protein_PNS1-like,_transcript_variant_X2	Olive
LOC111403661	-1.57856	-2.98671	1.75e-17	1.34e-16	XP_022888013.1	aquaporin_SIP2-1	Olive
LOC111395583	-1.58766	-3.00562	2.51e-21	2.32e-20	XP_022877394.1	cationic_amino_acid_transporter_8,_vacuolar-like	Olive
LOC111400891	-1.58809	-3.00651	1.31e-06	4.53e-06	XP_022884110.1	calcium-binding_protein_CML45	Olive
LOC111411825	-1.5908	-3.01216	2.52e-19	2.12e-18	XP_022898218.1	calcium-transporting_ATPase_12,_plasma_membrane-type-like	Olive
LOC111372555	-1.59112	-3.01284	1.11e-05	3.42e-05		calcium-binding_protein_CML19	Olive
LOC111387747	-1.60129	-3.03415	1.02e-09	4.78e-09	XP_022868100.1	sulfate_transporter_3.1-like	Olive
LOC111402869	-1.6173	-3.068	8.86e-27	1.03e-25	XP_022886940.1	GABA_transporter_2	Olive
LOC111381296	-1.62862	-3.09218	2.41e-44	5e-43	XP_022860836.1	calcium-binding_protein_CAST-like	Olive
LOC111378614	-1.62885	-3.09266	6.06e-14	3.79e-13	XP_022857611.1	calcium-binding_protein_CML21	Olive
LOC111371767	-1.63155	-3.09847	4.88e-29	6.25e-28	XP_022849687.1	CSC1-like_protein_RXW8,_transcript_variant_X6	Olive
LOC111372554	-1.64714	-3.13213	4.15e-08	1.68e-07	XP_022850682.1	calcium-binding_protein_CML38-like	Olive
LOC111377724	-1.64947	-3.13718	8.49e-32	1.2e-30	XP_022856621.1	UDP-galactose_transporter_1,_transcript_variant_X2	Olive
LOC111398662	-1.65313	-3.14515	3.88e-07	1.42e-06	XP_022881441.1	boron_transporter_7	Olive
LOC111390902	-1.66204	-3.16464	6.57e-19	5.41e-18	XP_022871790.1	plasma_membrane_ATPase_4-like,_transcript_variant_X2	Olive
LOC111372732	-1.66735	-3.1763	6.73e-14	4.19e-13	XP_022850891.1	bidirectional_sugar_transporter_SWEET2a-like	Olive
LOC111371374	-1.6721	-3.18678	2.49e-24	2.63e-23	XP_022849083.1	aquaporin_TIP1-2	Olive
LOC111381900	-1.68174	-3.20814	2.93e-15	1.98e-14	XP_022861515.1	cation/H(+)_antiporter_1-like	Olive
LOC111394626	-1.69354	-3.23449	6.47e-23	6.45e-22	XP_022876303.1	cationic_amino_acid_transporter_6,_chloroplastic-like	Olive
LOC111397636	-1.71302	-3.27847	4.2e-18	3.32e-17	XP_022880430.1	amino_acid_transporter_AVT6C-like,_transcript_variant_X5	Olive
LOC111399635	-1.71999	-3.29435	5.37e-39	9.53e-38	XP_022882870.1	amino_acid_transporter_AVT6C-like	Olive
LOC111404178	-1.72598	-3.30804	1.13e-06	3.93e-06	XP_022888713.1	anion_transporter_3,_chloroplastic	Olive
LOC111380077	-1.72788	-3.31241	1.73e-27	2.09e-26	XP_022859309.1	copper_transporter_5.1-like	Olive
LOC111367895	-1.73158	-3.32092	1.7e-18	1.37e-17	XP_022844767.1	amino_acid_transporter_AVT6A-like,_transcript_variant_X5	Olive
LOC111392543	-1.73905	-3.33815	1.68e-23	1.72e-22	XP_022873676.1	mitochondrial_succinate-fumarate_transporter_1	Olive
LOC111386970	-1.73909	-3.33825	4.32e-24	4.51e-23	XP_022867268.1	UDP-xylose_transporter_3-like	Olive
LOC111372520	-1.7424	-3.34592	1.87e-27	2.25e-26	XP_022850636.1	UDP-galactose/UDP-glucose_transporter_3	Olive
LOC111369966	-1.74462	-3.35106	8.28e-09	3.58e-08	XP_022847471.1	GDP-mannose_transporter_GONST1-like,_transcript_variant_X2	Olive
LOC111398585	-1.74892	-3.36107	3.04e-19	2.54e-18	XP_022881322.1	mechanosensitive_ion_channel_protein_10-like	Olive
LOC111370967	-1.75552	-3.37649	2.45e-15	1.67e-14	XP_022848660.1	calcium-binding_protein_PBP1-like,_transcript_variant_X2	Olive
LOC111368873	-1.77939	-3.4328	2.88e-12	1.62e-11	XP_022846124.1	sugar_phosphate/phosphate_translocator_At3g14410	Olive
LOC111370934	-1.79057	-3.45951	5.45e-27	6.4e-26	XP_022848609.1	potassium_channel_KAT3-like	Olive
LOC111380819	-1.80737	-3.50004	3.99e-20	3.48e-19	XP_022860242.1	WAT1-related_protein_At4g08300-like	Olive
LOC111389498	-1.82044	-3.53189	7.37e-51	1.81e-49	XP_022870209.1	serine/threonine-protein_kinase_PBL5,_transcript_variant_X4	Olive
LOC111395831	-1.88135	-3.68421	6.59e-07	2.36e-06	XP_022877779.1	ABC_transporter_C_family_member_3-like,_transcript_variant_X2	Olive
LOC111370387	-1.89695	-3.72425	6.35e-43	1.27e-41	XP_022847837.1	calcium-binding_protein_CML36	Olive
LOC111367244	-1.9033	-3.74068	2.01e-42	3.95e-41	XP_022843776.1	calcium-transporting_ATPase_2,_plasma_membrane-type-like	Olive
LOC111376275	-1.98454	-3.95736	1.07e-38	1.88e-37	XP_022854992.1	calcium-transporting_ATPase_8,_plasma_membrane-type-like,_transcript_variant_X6	Olive
LOC111391856	-1.98483	-3.95815	2.35e-10	1.15e-09	XP_022872901.1	pleiotropic_drug_resistance_protein_3-like	Olive
LOC111399651	-1.99333	-3.98155	4.82e-06	1.56e-05	XP_022882854.1	UDP-URONIC_ACID_TRANSPORTER_1-like	Olive
LOC111395663	-1.9958	-3.98837	5.13e-40	9.34e-39	XP_022877523.1	folate-biopterin_transporter_4	Olive
LOC111379070	-2.00955	-4.02656	5.83e-14	3.65e-13	XP_022858163.1	ABC_transporter_G_family_member_25-like	Olive
LOC111406068	-2.01756	-4.04897	5.13e-32	7.32e-31	XP_022891028.1	calcium-binding_protein_CML13	Olive
LOC111383778	-2.02148	-4.05999	1.1e-73	4.34e-72	XP_022863699.1	magnesium_transporter_MRS2-3-like	Olive
LOC111409764	-2.02473	-4.06917	2.12e-25	2.35e-24	XP_022895555.1	sulfate_transporter_1.3-like,_transcript_variant_X4	Olive
LOC111382704	-2.03385	-4.09497	2.63e-05	7.76e-05	XP_022862511.1	two_pore_calcium_channel_protein_1A-like	Olive
LOC111394384	-2.04826	-4.13607	6.16e-73	2.38e-71	XP_022875944.1	sucrose_transport_protein-like	Olive
LOC111401758	-2.04956	-4.13979	5.84e-28	7.19e-27	XP_022885409.1	ABC_transporter_G_family_member_11	Olive
LOC111402058	-2.07292	-4.20737	1.64e-06	5.62e-06	XP_022885867.1	vacuolar_iron_transporter_homolog_2-like	Olive
LOC111397107	-2.07403	-4.21062	6.43e-19	5.29e-18	XP_022879617.1	potassium_channel_KAT3-like,_transcript_variant_X2	Olive
LOC111403839	-2.07463	-4.21237	1.04e-39	1.88e-38	XP_022888234.1	calcium-transporting_ATPase_8,_plasma_membrane-type-like,_transcript_variant_X2	Olive
LOC111373247	-2.087	-4.24864	1.21e-45	2.61e-44	XP_022851522.1	purine_permease_11	Olive
LOC111372312	-2.08963	-4.25638	2.08e-27	2.49e-26	XP_022850352.1	amino_acid_transporter_AVT6E	Olive
LOC111367610	-2.13057	-4.3789	6.74e-16	4.74e-15	XP_022844346.1	sugar_transporter_ERD6-like_6,_transcript_variant_X3	Olive
LOC111393168	-2.1311	-4.38053	1.97e-22	1.92e-21	XP_022874331.1	mitochondrial_dicarboxylate/tricarboxylate_transporter_DTC-like	Olive
LOC111374687	-2.13247	-4.38467	6.75e-51	1.66e-49	XP_022853166.1	two-pore_potassium_channel_5-like,_transcript_variant_X2	Olive
LOC111402201	-2.21675	-4.64846	5e-31	6.85e-30	XP_022886129.1	plasma_membrane_ATPase_4	Olive
LOC111368637	-2.21749	-4.65085	9.09e-44	1.86e-42	XP_022845764.1	amino_acid_transporter_AVT1C-like,_transcript_variant_X5	Olive
LOC111373172	-2.22211	-4.66574	2.39e-05	7.09e-05	XP_022851443.1	bidirectional_sugar_transporter_SWEET1-like	Olive
LOC111409609	-2.23749	-4.71576	8.43e-13	4.9e-12	XP_022895403.1	calcium_uniporter_protein_4,_mitochondrial-like	Olive
LOC111378372	-2.24126	-4.72811	4.07e-18	3.22e-17	XP_022857332.1	calcium-binding_protein_CML38-like	Olive
LOC111406067	-2.25097	-4.76003	2.93e-33	4.34e-32	XP_022891027.1	calcium-binding_protein_CML13	Olive
LOC111374184	-2.26192	-4.7963	2.69e-08	1.11e-07	XP_022852584.1	two-pore_potassium_channel_1	Olive
LOC111396105	-2.27781	-4.8494	3.24e-15	2.19e-14	XP_022878165.1	bidirectional_sugar_transporter_N3-like	Olive
LOC111384425	-2.28474	-4.87277	2.82e-10	1.37e-09	XP_022864466.1	sodium/hydrogen_exchanger_4,_transcript_variant_X2	Olive
LOC111389936	-2.29817	-4.91835	6.46e-54	1.72e-52	XP_022870690.1	protein_EXORDIUM-like	Olive
LOC111369711	-2.30853	-4.95376	2.61e-36	4.26e-35	XP_022847100.1	calcium_uniporter_protein_5,_mitochondrial-like	Olive
LOC111386685	-2.31324	-4.97	7.8e-103	4.88e-101	XP_022866914.1	polyol_transporter_1	Olive
LOC111384484	-2.33649	-5.05071	5.46e-66	1.86e-64	XP_022864528.1	calcium-binding_protein_CML36	Olive
LOC111386199	-2.35234	-5.10651	8.28e-16	5.79e-15	XP_022866423.1	CSC1-like_protein_At3g54510	Olive
LOC111379215	-2.37829	-5.19919	9.24e-15	6.1e-14	XP_022858329.1	calcium_uniporter_protein_2,_mitochondrial-like	Olive
LOC111384664	-2.38448	-5.22155	1.77e-39	3.18e-38	XP_022864751.1	calcium-transporting_ATPase_4,_plasma_membrane-type-like	Olive
LOC111402320	-2.39763	-5.26935	3.42e-105	2.19e-103	XP_022886310.1	sugar_carrier_protein_C-like	Olive
LOC111375854	-2.4117	-5.321	4.21e-33	6.21e-32	XP_022854531.1	CSC1-like_protein_At4g02900,_transcript_variant_X2	Olive
LOC111373236	-2.43035	-5.39023	2.1e-85	1.02e-83	XP_022851511.1	ABC_transporter_C_family_member_15,_transcript_variant_X2	Olive
LOC111406025	-2.44249	-5.43578	1.02e-06	3.57e-06	XP_022890961.1	protein_phosphatase_2C_25	Olive
LOC111367921	-2.44358	-5.43989	3.6e-32	5.16e-31	XP_022844801.1	calcium_uniporter_protein_2,_mitochondrial-like	Olive
LOC111388715	-2.44452	-5.44343	2.26e-15	1.54e-14	XP_022869267.1	folate-biopterin_transporter_8,_chloroplastic	Olive
LOC111379061	-2.51523	-5.71688	4.27e-32	6.12e-31	XP_022858158.1	metal_transporter_Nramp2-like	Olive
LOC111401466	-2.53216	-5.78438	3.3e-24	3.47e-23	XP_022884973.1	boron_transporter_4-like	Olive
LOC111412340	-2.5464	-5.84176	5.74e-43	1.15e-41	XP_022898994.1	cationic_amino_acid_transporter_1-like	Olive
LOC111391732	-2.56522	-5.91847	2.16e-41	4.11e-40	XP_022872751.1	cation/H(+)_antiporter_20-like	Olive
LOC111402968	-2.59078	-6.02425	6.58e-43	1.31e-41	XP_022887070.1	S-type_anion_channel_SLAH3-like,_transcript_variant_X5	Olive
LOC111384828	-2.61351	-6.11989	8.26e-39	1.45e-37	XP_022864929.1	potassium_channel_SKOR-like	Olive
LOC111375723	-2.62298	-6.16023	8.19e-38	1.39e-36	XP_022854358.1	oligopeptide_transporter_7	Olive
LOC111367356	-2.628	-6.18167	1.62e-70	6.01e-69	XP_022843945.1	calcium-binding_protein_CML18	Olive
LOC111366597	-2.62909	-6.18636	8.88e-06	2.78e-05	XP_022843092.1	calcium-transporting_ATPase_9,_plasma_membrane-type-like	Olive
LOC111368109	-2.67716	-6.39596	6.21e-104	3.94e-102	XP_022845088.1	boron_transporter_1-like	Olive
LOC111393801	-2.70412	-6.51659	3.09e-24	3.25e-23	XP_022875279.1	metal_tolerance_protein_4-like	Olive
LOC111405473	-2.71187	-6.55169	3.9e-61	1.23e-59	XP_022890138.1	proline_transporter_2-like	Olive
LOC111371488	-2.75918	-6.77012	4.22e-124	3.53e-122	XP_022849284.1	aquaporin_TIP2-1-like	Olive
LOC111379320	-2.76682	-6.80607	7.14e-28	8.76e-27	XP_022858444.1	metal_transporter_Nramp2-like	Olive
LOC111400245	-2.77465	-6.84312	3.14e-27	3.73e-26	XP_022883440.1	protein_CNGC15b-like	Olive
LOC111378369	-2.8086	-7.00603	4.72e-28	5.84e-27	XP_022857327.1	calcium-binding_protein_CML19	Olive
LOC111372803	-2.83786	-7.1496	1.18e-66	4.05e-65	XP_022850975.1	UDP-xylose_transporter_1	Olive
LOC111384744	-2.86521	-7.28642	1.15e-36	1.89e-35	XP_022864830.1	non-specific_lipid-transfer_protein_3-like,_transcript_variant_X2	Olive
LOC111386376	-2.87495	-7.33578	9.64e-69	3.46e-67		ABC_transporter_G_family_member_40-like	Olive
LOC111380921	-2.88942	-7.40974	3.21e-29	4.14e-28	XP_022860357.1	vacuolar_cation/proton_exchanger_2-like	Olive
LOC111382268	-2.89031	-7.4143	4.53e-99	2.69e-97	XP_022861951.1	sulfate_transporter_3.1-like	Olive
LOC111367463	-2.91331	-7.53347	1.54e-38	2.68e-37	XP_022844120.1	metal-nicotianamine_transporter_YSL7	Olive
LOC111389932	-2.91673	-7.55133	4.74e-95	2.65e-93	XP_022870688.1	protein_EXORDIUM-like,_transcript_variant_X2	Olive
LOC111367293	-2.99259	-7.95903	1.61e-51	4e-50	XP_022843864.1	sulfate_transporter_3.4	Olive
LOC111412527	-2.99677	-7.9821	1.79e-52	4.59e-51	XP_022899233.1	ammonium_transporter_3_member_3-like	Olive
LOC111371803	-3.02918	-8.16344	2.3e-37	3.84e-36	XP_022849740.1	boron_transporter_6,_transcript_variant_X3	Olive
LOC111381590	-3.07078	-8.40228	1.21e-70	4.51e-69	XP_022861152.1	aquaporin_PIP2-1-like	Olive
LOC111402372	-3.13837	-8.80528	4.11e-20	3.58e-19	XP_022886381.1	chloride_channel_protein_CLC-f-like	Olive
LOC111389701	-3.15852	-8.92913	5.88e-32	8.36e-31		calcium-binding_protein_CML18	Olive
LOC111389070	-3.18566	-9.09872	6.58e-11	3.37e-10	XP_022869691.1	calcium-transporting_ATPase_5,_plasma_membrane-type-like	Olive
LOC111385047	-3.22368	-9.34166	1.56e-17	1.21e-16		sodium/calcium_exchanger_NCL2-like	Olive
LOC111389071	-3.233	-9.4022	2.1e-40	3.85e-39	XP_022869692.1	calcium-transporting_ATPase_8,_plasma_membrane-type-like	Olive
LOC111371785	-3.31104	-9.92484	4.75e-12	2.64e-11	XP_022849707.1	copper-transporting_ATPase_HMA5	Olive
LOC111385841	-3.34566	-10.1658	7.92e-13	4.62e-12	XP_022866040.1	vacuolar_cation/proton_exchanger_3-like	Olive
LOC111370065	-3.36174	-10.2798	3.12e-14	1.99e-13	XP_022847543.1	sodium/calcium_exchanger_NCL1-like	Olive
LOC111399771	-3.37649	-10.3855	1e-106	6.61e-105	XP_022883015.1	ABC_transporter_G_family_member_22-like,_transcript_variant_X2	Olive
LOC111376977	-3.4324	-10.7958	2.53e-171	4.09e-169	XP_022855758.1	pleiotropic_drug_resistance_protein_1-like	Olive
LOC111400986	-3.46195	-11.0192	2.73e-46	6e-45	XP_022884260.1	calcium_uniporter_protein_2,_mitochondrial-like	Olive
LOC111396542	-3.47553	-11.1234	9.48e-22	8.94e-21	XP_022878723.1	calcium-binding_protein_CML15	Olive
LOC111371359	-3.48556	-11.2011	1.45e-64	4.82e-63	XP_022849066.1	serine/threonine-protein_kinase_PBL7	Olive
LOC111392397	-3.52463	-11.5085	1.05e-87	5.3e-86	XP_022873507.1	cation/H(+)_antiporter_18-like,_transcript_variant_X4	Olive
LOC111400829	-3.62947	-12.376	9.79e-108	6.57e-106	XP_022884020.1	magnesium_transporter_NIPA4	Olive
LOC111402081	-3.72189	-13.1947	8.01e-20	6.91e-19	XP_022885901.1	glutamate_receptor_3.5-like,_transcript_variant_X2	Olive
LOC111385367	-3.74035	-13.3647	2.28e-103	1.44e-101	XP_022865518.1	ATPase_N2B	Olive
LOC111390667	-3.79015	-13.834	1.62e-46	3.59e-45	XP_022871497.1	proline_transporter_1-like,_transcript_variant_X3	Olive
LOC111405439	-3.79033	-13.8358	6.53e-25	7.06e-24	XP_022890093.1	ATPase_ASNA1_homolog_2-like	Olive
LOC111405439	-3.79033	-13.8358	6.53e-25	7.06e-24	XP_022890093.1	ATPase_ASNA1_homolog_2-like	Olive
LOC111389038	-3.79995	-13.9283	4.08e-139	4.25e-137	XP_022869652.1	S-type_anion_channel_SLAH2-like	Olive
LOC111365354	-3.92087	-15.146	2.36e-48	5.48e-47	XP_022841624.1	white-brown_complex_homolog_protein_30,_transcript_variant_X3	Olive
LOC111401089	-4.05906	-16.6686	2.46e-16	1.78e-15	XP_022884403.1	sodium/hydrogen_exchanger_2-like	Olive
LOC111412229	-4.06314	-16.7157	2.59e-68	9.2e-67	XP_022898837.1	potassium_channel_KAT3-like	Olive
LOC111375915	-4.10113	-17.1618	1.3e-157	1.74e-155	XP_022854600.1	bidirectional_sugar_transporter_N3-like,_transcript_variant_X4	Olive
LOC111399587	-4.11261	-17.2989	1.84e-81	8.44e-80	XP_022882754.1	aquaporin_SIP2-1,_transcript_variant_X2	Olive
LOC111402136	-4.14922	-17.7435	3.32e-126	2.87e-124	XP_022885993.1	calcium-transporting_ATPase_2,_plasma_membrane-type-like	Olive
LOC111398569	-4.15073	-17.762	3.1e-112	2.22e-110	XP_022881301.1	calcium-binding_protein_CAST-like	Olive
LOC111398833	-4.16232	-17.9054	1.76e-53	4.62e-52	XP_022881712.1	high_affinity_nitrate_transporter_2.5-like,_transcript_variant_X2	Olive
LOC111365997	-4.35778	-20.5032	4.27e-93	2.34e-91	XP_022842371.1	inositol_transporter_4-like,_transcript_variant_X2	Olive
LOC111393449	-4.39941	-21.1035	3.2e-40	5.87e-39	XP_022874750.1	organic_cation/carnitine_transporter_4-like	Olive
LOC111401803	-4.43877	-21.6872	4.18e-62	1.33e-60	XP_022885478.1	bidirectional_sugar_transporter_SWEET10-like	Olive
LOC111401087	-4.44196	-21.7352	1.93e-59	5.86e-58	XP_022884401.1	sodium/hydrogen_exchanger_1-like,_transcript_variant_X2	Olive
LOC111383535	-4.48658	-22.4178	1.02e-74	4.11e-73	XP_022863415.1	cation/H(+)_antiporter_14-like	Olive
LOC111405060	-4.69599	-25.92	1.26e-212	3.95e-210	XP_022889519.1	polyol_transporter_5-like,_transcript_variant_X3	Olive
LOC111384072	-4.73914	-26.7069	4.54e-91	2.41e-89	XP_022864063.1	heavy_metal-associated_isoprenylated_plant_protein_5-like	Olive
LOC111382357	-4.77349	-27.3504	1.04e-67	3.63e-66	XP_022862069.1	WAT1-related_protein_At5g47470,_transcript_variant_X4	Olive
LOC111407237	-4.82676	-28.3792	1.24e-34	1.92e-33	XP_022892369.1	two-pore_potassium_channel_3-like	Olive
LOC111368528	-4.84957	-28.8314	2.74e-207	7.88e-205	XP_022845577.1	cation/H(+)_antiporter_15-like	Olive
LOC111391550	-4.84974	-28.8349	9.51e-94	5.25e-92	XP_022872552.1	UDP-galactose/UDP-glucose_transporter_4-like	Olive
LOC111401085	-4.87184	-29.28	1.87e-20	1.65e-19	XP_022884397.1	sodium/hydrogen_exchanger_1-like	Olive
LOC111405143	-5.09277	-34.1253	8.84e-151	1.08e-148	XP_022889671.1	mitochondrial_arginine_transporter_BAC2-like	Olive
LOC111384357	-5.09504	-34.1789	5.56e-206	1.53e-203	XP_022864395.1	amino_acid_transporter_AVT1H	Olive
LOC111370451	-5.10725	-34.4695	1.04e-27	1.26e-26	XP_022847931.1	phospholipid-transporting_ATPase_5	Olive
LOC111370451	-5.10725	-34.4695	1.04e-27	1.26e-26	XP_022847931.1	phospholipid-transporting_ATPase_5	Olive
LOC111391939	-5.16964	-35.9929	1.07e-175	1.83e-173	XP_022872993.1	inorganic_phosphate_transporter_1-4	Olive
LOC111368012	-5.31308	-39.7553	8.66e-174	1.44e-171	XP_022844943.1	rop_guanine_nucleotide_exchange_factor_12-like,_transcript_variant_X4	Olive
LOC111412200	-5.34584	-40.6685	1.5e-37	2.51e-36	XP_022898780.1	ABC_transporter_B_family_member_9-like	Olive
LOC111378512	-5.39086	-41.9575	3.93e-26	4.46e-25	XP_022857494.1	calcium-binding_protein_PBP1-like	Olive
LOC111370922	-5.41645	-42.7083	1.56e-229	5.82e-227	XP_022848595.1	cation/H(+)_antiporter_15-like	Olive
LOC111376904	-5.46941	-44.3055	3.09e-90	1.62e-88	XP_022855686.1	cyclic_nucleotide-gated_ion_channel_18-like,_transcript_variant_X2	Olive
LOC111382289	-5.47954	-44.6175	2.73e-28	3.41e-27	XP_022861975.1	sugar_transport_protein_8-like	Olive
LOC111402009	-5.52771	-46.1324	7.31e-147	8.44e-145	XP_022885795.1	cation/H(+)_antiporter_2-like	Olive
LOC111397647	-5.5681	-47.4421	1.11e-154	1.44e-152	XP_022880417.1	sucrose_transport_protein_SUC8-like,_transcript_variant_X2	Olive
LOC111379322	-5.58764	-48.0891	2.96e-21	2.72e-20	XP_022858446.1	metal_transporter_Nramp2-like	Olive
LOC111407005	-5.61409	-48.9791	3.68e-116	2.78e-114	XP_022892114.1	protein_phosphatase_2C_65	Olive
LOC111382499	-5.62705	-49.4211	2.88e-125	2.47e-123	XP_022862267.1	potassium_channel_AKT1-like	Olive
LOC111372470	-5.65541	-50.4021	1.09e-160	1.51e-158	XP_022850595.1	sucrose_transport_protein-like	Olive
LOC111407228	-5.65588	-50.4186	2.45e-178	4.43e-176	XP_022892361.1	ABC_transporter_B_family_member_9-like	Olive
LOC111397589	-5.71013	-52.3503	2.11e-22	2.06e-21	XP_022880359.1	cation/H(+)_antiporter_15-like	Olive
LOC111406288	-5.72623	-52.9378	2.54e-29	3.29e-28	XP_022891406.1	lysine_histidine_transporter-like_2,_transcript_variant_X3	Olive
LOC111400983	-5.76254	-54.2871	1.5e-245	6.74e-243	XP_022884256.1	calcium-binding_protein_CML41	Olive
LOC111385710	-5.78694	-55.2132	1.77e-196	3.99e-194	XP_022865897.1	sugar_transport_protein_8-like	Olive
LOC111368735	-5.79537	-55.5369	6.89e-191	1.46e-188	XP_022845921.1	sugar_carrier_protein_C-like	Olive
LOC111393624	-5.79841	-55.654	6.59e-108	4.44e-106	XP_022875017.1	magnesium_transporter_NIPA1,_transcript_variant_X7	Olive
LOC111370703	-5.82219	-56.5786	1.54e-60	4.77e-59	XP_022848308.1	metal_tolerance_protein_9	Olive
LOC111382291	-5.87414	-58.6534	1.77e-07	6.73e-07	XP_022861978.1	sugar_transport_protein_8-like	Olive
LOC111370925	-5.89262	-59.4095	7.79e-128	6.95e-126	XP_022848629.1	rop_guanine_nucleotide_exchange_factor_9-like	Olive
LOC111393843	-6.09002	-68.1207	6.79e-121	5.48e-119	XP_022875332.1	ABC_transporter_G_family_member_28	Olive
LOC111382506	-6.11184	-69.1587	1.24e-106	8.19e-105	XP_022862277.1	boron_transporter_7,_transcript_variant_X2	Olive
LOC111406793	-6.13664	-70.3577	6.62e-174	1.1e-171	XP_022891935.1	oligopeptide_transporter_6-like	Olive
LOC111408260	-6.1675	-71.8793	2.21e-29	2.86e-28	XP_022893812.1	calcium_uptake_protein,_mitochondrial-like	Olive
LOC111400039	-6.21297	-74.1807	2.23e-24	2.36e-23	XP_022883270.1	protein_kinase_At2g41970	Olive
LOC111396559	-6.23448	-75.2949	7.32e-61	2.29e-59	XP_022878738.1	calcium-binding_protein_CML25	Olive
LOC111392832	-6.25882	-76.576	2.86e-43	5.77e-42	XP_022873993.1	rop_guanine_nucleotide_exchange_factor_9-like	Olive
LOC111383895	-6.33693	-80.8362	1.16e-197	2.75e-195	XP_022863850.1	aquaporin_TIP1-3-like	Olive
LOC111396563	-6.39713	-84.2806	2.17e-149	2.6e-147	XP_022878741.1	cation/H(+)_antiporter_15	Olive
LOC111366570	-6.40972	-85.0193	1.26e-123	1.05e-121	XP_022843065.1	bidirectional_sugar_transporter_SWEET5	Olive
LOC111370735	-6.42359	-85.8404	1.61e-206	4.47e-204	XP_022848356.1	pleiotropic_drug_resistance_protein_2-like	Olive
LOC111392340	-6.43805	-86.7055	2.43e-102	1.5e-100	XP_022873431.1	cyclic_nucleotide-gated_ion_channel_18	Olive
LOC111381413	-6.57704	-95.474	3.34e-64	1.11e-62	XP_022860957.1	cation/H(+)_antiporter_24-like	Olive
LOC111382315	-6.76676	-108.893	8.43e-47	1.88e-45	XP_022862014.1	mechanosensitive_ion_channel_protein_6-like	Olive
LOC111406589	-6.83709	-114.333	2.43e-93	1.33e-91	XP_022891749.1	S-type_anion_channel_SLAH3-like	Olive
LOC111399299	-7.08902	-136.147	2.76e-240	1.15e-237	XP_022882323.1	sugar_transport_protein_10-like	Olive
LOC111371251	-7.23343	-150.48	1.36e-42	2.69e-41	XP_022848906.1	cation/H(+)_antiporter_24-like	Olive
LOC111410528	-7.42715	-172.105	2.4e-57	6.92e-56	XP_022896682.1	mechanosensitive_ion_channel_protein_6-like	Olive
LOC111383532	-7.57322	-190.444	8.33e-13	4.85e-12	XP_022863413.1	cation/H(+)_antiporter_15-like	Olive
LOC111385711	-7.94174	-245.867	3.3e-201	8.75e-199	XP_022865898.1	sugar_transport_protein_8-like	Olive
LOC111367829	-8.14859	-283.773	1.01e-20	9e-20	XP_022844659.1	ABC_transporter_G_family_member_29-like	Olive
LOC111402520	-8.41896	-342.263	1.97e-36	3.22e-35	XP_022886658.1	ABC_transporter_G_family_member_9	Olive
LOC111411160	-8.68015	-410.19	3.34e-07	1.23e-06	XP_022897487.1	WAT1-related_protein_At1g09380-like	Olive
LOC111382436	-9.39008	-670.959	5.57e-75	2.27e-73	XP_022862182.1	plasma_membrane_ATPase_4-like	Olive
LOC111372052	-10.1558	-1140.8	1.11e-229	4.21e-227	XP_022849974.1	plasma_membrane_ATPase_4-like	Olive
LOC111387719	-0.616314	-1.53295	0.000118841	0.000320509	XP_022868068.1	actin	Olive
LOC111399720	-1.50994	-2.84798	1.59e-14	1.04e-13	XP_022882952.1	actin-2-like	Olive
LOC111389773	-5.01217	-32.271	8.47e-156	1.13e-153	XP_022870506.1	actin-66-like,_transcript_variant_X2	Olive
LOC111408661	-1.08584	-2.12261	2.31e-07	8.66e-07	XP_022894159.1	actin-7	Olive
LOC111369908	-1.74614	-3.3546	5.2e-29	6.65e-28	XP_022847391.1	actin-7-like	Olive
LOC111401141	-1.12092	-2.17486	4.84e-21	4.41e-20	XP_022884507.1	actin-7-like	Olive
LOC111403700	-3.84845	-14.4046	1.82e-109	1.26e-107		actin-85C-like	Olive
LOC111397366	-2.69607	-6.48035	1.53e-68	5.47e-67	XP_022880028.1	actin-97	Olive
LOC111365940	-2.89545	-7.44075	5.01e-45	1.07e-43	XP_022842280.1	actin-97-like	Olive
LOC111399692	-3.23942	-9.44414	1.2e-122	9.83e-121	XP_022882916.1	actin-97-like	Olive
LOC111405796	-1.02045	-2.02856	2.19e-12	1.24e-11	XP_022890605.1	actin-depolymerizing_factor,_transcript_variant_X2	Olive
LOC111384370	-0.847998	-1.8	1.14e-09	5.29e-09	XP_022864415.1	actin-depolymerizing_factor_2-like,_transcript_variant_X2	Olive
LOC111380796	-1.86796	-3.65017	4.51e-31	6.2e-30	XP_022860214.1	actin-depolymerizing_factor_5-like	Olive
LOC111393205	-6.7007	-104.019	4.6e-95	2.57e-93	XP_022874399.1	actin-depolymerizing_factor_7-like	Olive
LOC111393601	-7.03546	-131.185	3.41e-53	8.87e-52	XP_022875019.1	actin-depolymerizing_factor_7-like	Olive
LOC111378719	-0.792998	-1.73267	6.73e-05	0.000188076	XP_022857722.1	actin-depolymerizing_factor-like	Olive
LOC111390573	-0.972265	-1.96192	0.000132762	0.000355403	XP_022871402.1	actin-depolymerizing_factor-like	Olive
LOC111401930	-0.666931	-1.58769	1.82e-06	6.21e-06	XP_022885720.1	actin-interacting_protein_1-2-like	Olive
LOC111402267	-1.50197	-2.8323	1.6e-19	1.36e-18	XP_022886210.1	actin-related_protein_2/3_complex_subunit_3	Olive
LOC111390714	-0.648008	-1.567	5.95e-05	0.000167572	XP_022871568.1	actin-related_protein_2/3_complex_subunit_3-like,_transcript_variant_X2	Olive
LOC111369737	-0.645669	-1.56446	0.0134838	0.0257787	XP_022847140.1	actin-related_protein_2/3_complex_subunit_5A	Olive
LOC111368902	-1.80297	-3.48938	9.35e-13	5.43e-12	XP_022846181.1	arabinosyltransferase_ARAD1	Olive
LOC111382381	-1.00854	-2.01188	2.9e-09	1.31e-08	XP_022862096.1	arabinosyltransferase_ARAD1	Olive
LOC111389784	-2.55665	-5.88341	5e-26	5.66e-25	XP_022870521.1	arabinosyltransferase_ARAD1	Olive
LOC111401612	-1.61873	-3.07104	4.69e-31	6.45e-30	XP_022885190.1	arabinosyltransferase_ARAD1,_transcript_variant_X2	Olive
LOC111391935	-1.21571	-2.32256	3.4e-19	2.84e-18	XP_022872989.1	bet1-like_SNARE_1-1,_transcript_variant_X2	Olive
LOC111402393	-0.761918	-1.69574	0.00539214	0.0111651	XP_022886431.1	bet1-like_SNARE_1-1,_transcript_variant_X2	Olive
LOC111381294	-0.475046	-1.38996	0.00234107	0.00516313	XP_022860833.1	cactin-like	Olive
LOC111388642	-0.420107	-1.33803	0.0121018	0.0233839	XP_022869164.1	dynamin-2A-like	Olive
LOC111403219	-4.72942	-26.5275	4.78e-46	1.04e-44	XP_022887405.1	dynamin-related_protein_1C,_transcript_variant_X2	Olive
LOC111389055	-2.13001	-4.37719	1.38e-13	8.43e-13	XP_022869686.1	dynamin-related_protein_3A-like,_transcript_variant_X2	Olive
LOC111410392	-0.70427	-1.62932	5.66e-05	0.000159921	XP_022896472.1	dynamin-related_protein_5A	Olive
LOC111405860	-0.313075	-1.24235	0.0137166	0.0261905	XP_022890701.1	GTPase_LSG1-2-like	Olive
LOC111376572	-1.20679	-2.30824	1.66e-21	1.54e-20	XP_022855306.1	GTPase-activating_protein_gyp7-like	Olive
LOC111407661	-1.48064	-2.79073	1.07e-39	1.94e-38	XP_022893054.1	GTPase-activating_protein_gyp7-like,_transcript_variant_X4	Olive
LOC111401464	-1.14905	-2.21768	2.68e-05	7.89e-05	XP_022884971.1	GTP-binding_nuclear_protein_Ran/TC4-like	Olive
LOC111387235	-1.6342	-3.10415	6.96e-11	3.55e-10	XP_022867545.1	GTP-binding_protein_SAR1A	Olive
LOC111369082	-1.29297	-2.45033	6.81e-06	2.16e-05		GTP-binding_protein_SAR1A-like	Olive
LOC111390196	-0.844557	-1.79571	7.45e-13	4.35e-12	XP_022870970.1	GTP-binding_protein_SAR1A-like	Olive
LOC111405740	-1.81438	-3.51708	3.93e-14	2.49e-13	XP_022890531.1	GTP-binding_protein_SAR1A-like	Olive
LOC111409889	-0.657417	-1.57726	0.00125832	0.00290469	XP_022895753.1	GTP-binding_protein_SAR1A-like	Olive
LOC111382952	-0.780321	-1.71751	3.03e-07	1.12e-06	XP_022862767.1	GTP-binding_protein_YPTM2	Olive
LOC111368758	-1.7176	-3.2889	0.000323018	0.000818151	XP_022845953.1	GTP-binding_protein_YPTM2-like	Olive
LOC111396648	-1.12509	-2.18116	1.16e-20	1.04e-19	XP_022878849.1	kinesin-like_protein_KIN-12B	Olive
LOC111365998	-0.796153	-1.73646	1.66e-12	9.48e-12	XP_022842372.1	kinesin-like_protein_KIN-12C	Olive
LOC111367882	-0.644726	-1.56344	8.47e-09	3.66e-08	XP_022844740.1	kinesin-like_protein_KIN-13A	Olive
LOC111396581	-0.640862	-1.55926	9.05e-09	3.9e-08	XP_022878756.1	kinesin-like_protein_KIN-13A,_transcript_variant_X7	Olive
LOC111391234	-3.97009	-15.6717	6.71e-47	1.51e-45	XP_022872170.1	kinesin-like_protein_KIN-14C,_transcript_variant_X5	Olive
LOC111408089	-4.39511	-21.0406	2.1e-73	8.23e-72	XP_022893638.1	kinesin-like_protein_KIN-14I	Olive
LOC111392697	-1.24329	-2.36737	5.09e-11	2.63e-10	XP_022873860.1	kinesin-like_protein_KIN-14J	Olive
LOC111371167	-0.477989	-1.3928	0.00667661	0.0135838	XP_022848842.1	kinesin-like_protein_KIN-4C	Olive
LOC111401928	-0.91411	-1.88441	4.57e-07	1.67e-06	XP_022885678.1	kinesin-like_protein_KIN-7C	Olive
LOC111367380	-1.15717	-2.2302	3.18e-12	1.78e-11	XP_022843986.1	kinesin-like_protein_KIN-7G	Olive
LOC111408907	-5.29535	-39.27	7.92e-08	3.11e-07	XP_022894522.1	kinesin-like_protein_KIN-7G	Olive
LOC111373518	-1.76358	-3.3954	4.59e-20	3.99e-19	XP_022851826.1	membrin-11-like	Olive
LOC111411773	-1.12512	-2.1812	2.46e-06	8.25e-06	XP_022898144.1	membrin-11-like,_transcript_variant_X2	Olive
LOC111381044	-0.897926	-1.86339	1.65e-18	1.33e-17	XP_022860509.1	mental_retardation_GTPase_activating_protein_homolog_4-like	Olive
LOC111390254	-2.46067	-5.50473	3.96e-06	1.29e-05	XP_022871034.1	novel_plant_SNARE_11-like	Olive
LOC111407498	-1.52284	-2.87356	0.00689716	0.0139911	XP_022892777.1	novel_plant_SNARE_11-like	Olive
LOC111371552	-1.50826	-2.84466	8.91e-08	3.49e-07	XP_022849371.1	novel_plant_SNARE_12-like	Olive
LOC111376847	-1.62298	-3.08011	1.08e-10	5.44e-10	XP_022855607.1	novel_plant_SNARE_12-like	Olive
LOC111407647	-0.586862	-1.50198	0.000708989	0.00170314	XP_022893031.1	protein_KINESIN_LIGHT_CHAIN-RELATED_1-like	Olive
LOC111390359	-2.83338	-7.12744	1.86e-69	6.75e-68	XP_022871157.1	protein_KINESIN_LIGHT_CHAIN-RELATED_2-like,_transcript_variant_X6	Olive
LOC111408411	-0.707355	-1.63281	1.73e-08	7.25e-08	XP_022893943.1	protein_transport_protein_SEC16B_homolog	Olive
LOC111368762	-0.731257	-1.66008	5.93e-12	3.26e-11	XP_022845957.1	protein_transport_protein_SEC16B_homolog,_transcript_variant_X4	Olive
LOC111368881	-0.602565	-1.51841	0.000229647	0.000594691	XP_022846137.1	rab3_GTPase-activating_protein_non-catalytic_subunit	Olive
LOC111401975	-2.801	-6.96923	1.85e-08	7.75e-08	XP_022885743.1	rac-like_GTP-binding_protein_ARAC1	Olive
LOC111408980	-1.25581	-2.38801	3.99e-09	1.77e-08	XP_022894627.1	rac-like_GTP-binding_protein_ARAC1	Olive
LOC111378900	-0.897391	-1.86269	0.000720597	0.00172918	XP_022857945.1	rac-like_GTP-binding_protein_ARAC1,_transcript_variant_X2	Olive
LOC111380812	-0.990151	-1.98639	5.22e-10	2.49e-09	XP_022860246.1	rac-like_GTP-binding_protein_ARAC3,_transcript_variant_X2	Olive
LOC111408734	-0.846341	-1.79794	7.21e-07	2.57e-06	XP_022894297.1	rac-like_GTP-binding_protein_ARAC8	Olive
LOC111405762	-0.881187	-1.84189	7.9e-08	3.11e-07	XP_022890556.1	RAN_GTPase-activating_protein_1-like,_transcript_variant_X2	Olive
LOC111369672	-2.35205	-5.10551	3.55e-44	7.34e-43	XP_022847043.1	ras-related_protein_Rab11C-like	Olive
LOC111368515	-0.487503	-1.40202	0.0178341	0.0331716	XP_022845555.1	ras-related_protein_Rab11D	Olive
LOC111374098	-0.623147	-1.54023	1.07e-07	4.16e-07	XP_022852498.1	ras-related_protein_Rab11D-like	Olive
LOC111405882	-1.23672	-2.35661	1.91e-17	1.46e-16	XP_022890743.1	ras-related_protein_Rab2BV	Olive
LOC111378336	-5.97766	-63.0168	1.7e-147	2e-145	XP_022857285.1	ras-related_protein_Rab2BV-like	Olive
LOC111407806	-0.754369	-1.68689	2.88e-05	8.43e-05	XP_022893252.1	ras-related_protein_Rab2BV-like,_transcript_variant_X2	Olive
LOC111379306	-1.81172	-3.5106	0.00061704	0.00149713	XP_022858433.1	ras-related_protein_Rab7-like	Olive
LOC111370602	-3.28877	-9.77276	2.93e-46	6.43e-45	XP_022848162.1	ras-related_protein_RABA1f-like	Olive
LOC111393477	-0.41297	-1.33142	0.00594276	0.0122097	XP_022874788.1	ras-related_protein_RABA1f-like	Olive
LOC111375629	-0.484374	-1.39898	0.0121376	0.023445	XP_022854250.1	ras-related_protein_RABA2a-like	Olive
LOC111382058	-1.26257	-2.39923	1.77e-18	1.43e-17	XP_022861693.1	ras-related_protein_RABA2a-like	Olive
LOC111410457	-0.761957	-1.69579	0.000419564	0.00104297	XP_022896563.1	ras-related_protein_RABA4c-like	Olive
LOC111385167	-0.419229	-1.33721	0.00402878	0.00852632	XP_022865323.1	ras-related_protein_RABA4c-like,_transcript_variant_X3	Olive
LOC111403849	-2.44054	-5.42847	1.8e-12	1.03e-11	XP_022888249.1	ras-related_protein_RABA4d-like	Olive
LOC111384350	-0.767097	-1.70184	9.38e-06	2.93e-05	XP_022864390.1	ras-related_protein_RABA5c	Olive
LOC111369936	-2.29051	-4.89228	7.83e-56	2.18e-54	XP_022847437.1	ras-related_protein_RABA5e-like	Olive
LOC111405235	-2.87689	-7.34565	6.02e-21	5.44e-20	XP_022889806.1	ras-related_protein_RABA6a-like	Olive
LOC111370983	-1.41534	-2.66723	3.45e-17	2.62e-16	XP_022848678.1	ras-related_protein_RABB1c	Olive
LOC111378526	-1.4786	-2.78679	1.75e-14	1.14e-13	XP_022857507.1	ras-related_protein_RABB1c-like	Olive
LOC111402395	-1.29767	-2.45832	1.33e-05	4.08e-05	XP_022886426.1	ras-related_protein_RABB1c-like,_transcript_variant_X2	Olive
LOC111365290	-0.703826	-1.62882	0.00554085	0.0114476	XP_022841503.1	ras-related_protein_RABC1-like	Olive
LOC111388599	-1.26903	-2.41	0.000246074	0.000634301	XP_022869122.1	ras-related_protein_RABC1-like	Olive
LOC111403123	-0.838919	-1.78871	4.92e-06	1.59e-05	XP_022887284.1	ras-related_protein_RABC2a-like,_transcript_variant_X2	Olive
LOC111405542	-1.82127	-3.53392	4.36e-12	2.43e-11	XP_022890250.1	ras-related_protein_RABD2a-like	Olive
LOC111370447	-0.535194	-1.44914	0.00222457	0.00492686	XP_022847925.1	ras-related_protein_RABF2a-like	Olive
LOC111392456	-1.24903	-2.37682	9.14e-07	3.22e-06	XP_022873574.1	ras-related_protein_RABF2a-like	Olive
LOC111408001	-2.30922	-4.95615	2.69e-16	1.94e-15	XP_022893510.1	ras-related_protein_RABH1e	Olive
LOC111397177	-0.546121	-1.46015	0.011141	0.0216817	XP_022879716.1	ras-related_protein_RHN1	Olive
LOC111368889	-0.673361	-1.59478	5.54e-07	2e-06	XP_022846158.1	reticulon-4-interacting_protein_1,_mitochondrial	Olive
LOC111389037	-0.448	-1.36415	0.0221225	0.0403035		reticulon-like_protein_B1	Olive
LOC111394628	-0.493875	-1.40822	0.00232673	0.0051352	XP_022876307.1	reticulon-like_protein_B11,_transcript_variant_X2	Olive
LOC111410146	-0.924632	-1.8982	1.91e-05	5.73e-05	XP_022896134.1	reticulon-like_protein_B11,_transcript_variant_X2	Olive
LOC111411990	-0.617312	-1.53401	0.0156608	0.0295014	XP_022898474.1	reticulon-like_protein_B11,_transcript_variant_X2	Olive
LOC111403193	-3.44351	-10.8792	1.39e-26	1.6e-25	XP_022887368.1	reticulon-like_protein_B14	Olive
LOC111372722	-3.13793	-8.80259	6.18e-51	1.52e-49	XP_022851168.1	reticulon-like_protein_B2	Olive
LOC111375188	-0.906225	-1.87414	1.75e-09	8.03e-09	XP_022853756.1	reticulon-like_protein_B2	Olive
LOC111404917	-0.800981	-1.74229	6.77e-09	2.95e-08	XP_022889538.1	reticulon-like_protein_B22,_transcript_variant_X3	Olive
LOC111396580	-0.46542	-1.38072	0.0218494	0.03986	XP_022878753.1	reticulon-like_protein_B5	Olive
LOC111375240	-1.30148	-2.46481	3.84e-06	1.25e-05	XP_022853810.1	rho_GDP-dissociation_inhibitor_1-like	Olive
LOC111394070	-5.86947	-58.4637	2.13e-19	1.8e-18	XP_022875617.1	rho_GDP-dissociation_inhibitor_1-like	Olive
LOC111370681	-1.13728	-2.19965	6.34e-07	2.27e-06	XP_022848277.1	rho_GDP-dissociation_inhibitor_1-like,_transcript_variant_X2	Olive
LOC111407167	-1.04356	-2.06131	2.12e-10	1.04e-09	XP_022892263.1	rho_GDP-dissociation_inhibitor_1-like,_transcript_variant_X3	Olive
LOC111366261	-0.951623	-1.93405	1.21e-06	4.21e-06	XP_022842755.1	rho_GTPase-activating_protein_5-like	Olive
LOC111406055	-0.636438	-1.55449	4.32e-05	0.000123795	XP_022891013.1	Rho_GTPase-activating_protein_At5g61530,_transcript_variant_X6	Olive
LOC111377916	-0.470564	-1.38565	0.023104	0.0418468		Rho_GTPase-activating_protein_At5g61530-like	Olive
LOC111371163	-3.47367	-11.1091	1.67e-21	1.55e-20	XP_022848838.1	rho_GTPase-activating_protein_REN1-like	Olive
LOC111393681	-1.24775	-2.37471	1.37e-08	5.79e-08	XP_022875111.1	rho_GTPase-activating_protein_REN1-like,_transcript_variant_X2	Olive
LOC111395438	-1.52776	-2.88339	2.56e-30	3.42e-29	XP_022877201.1	ribose-5-phosphate_isomerase_1	Olive
LOC111372291	-3.66072	-12.647	9.85e-52	2.47e-50	XP_022850322.1	septum-promoting_GTP-binding_protein_1-like	Olive
LOC111379110	-1.80697	-3.49907	3.53e-11	1.84e-10	XP_022858210.1	septum-promoting_GTP-binding_protein_1-like	Olive
LOC111397330	-1.94287	-3.8447	3.17e-18	2.52e-17	XP_022879956.1	septum-promoting_GTP-binding_protein_1-like	Olive
LOC111367644	-0.37106	-1.2933	0.0114008	0.0221453	XP_022844397.1	small_GTPase_LIP1-like	Olive
LOC111393151	-0.46984	-1.38496	0.00489039	0.010204	XP_022874308.1	SNARE-interacting_protein_KEULE-like	Olive
LOC111392701	-0.946987	-1.92784	4.79e-08	1.93e-07	XP_022873869.1	SNARE-interacting_protein_KEULE-like,_transcript_variant_X4	Olive
LOC111384841	-5.88891	-59.2566	2.56e-60	7.91e-59	XP_022864939.1	syntaxin-112	Olive
LOC111366281	-1.75874	-3.38402	1.72e-24	1.83e-23	XP_022842778.1	syntaxin-121-like	Olive
LOC111375773	-5.67794	-51.1953	2.88e-130	2.69e-128	XP_022854425.1	syntaxin-124-like	Olive
LOC111386980	-5.44755	-43.6392	1.78e-175	3.02e-173	XP_022867251.1	syntaxin-124-like	Olive
LOC111399762	-4.39892	-21.0963	2.31e-52	5.88e-51	XP_022883002.1	syntaxin-132-like	Olive
LOC111388709	-0.568722	-1.48321	0.000170383	0.000449353	XP_022869262.1	syntaxin-22-like	Olive
LOC111398281	-1.17476	-2.25755	0.0206207	0.0378194	XP_022880970.1	syntaxin-22-like	Olive
LOC111398804	-1.91197	-3.76322	0.0001063	0.000288606	XP_022881674.1	syntaxin-22-like	Olive
LOC111410579	-1.42423	-2.6837	4.41e-17	3.32e-16	XP_022896760.1	syntaxin-22-like	Olive
LOC111381281	-0.594503	-1.50995	2.07e-06	7.04e-06	XP_022860814.1	syntaxin-32,_transcript_variant_X2	Olive
LOC111378957	-0.740125	-1.67032	1.66e-05	5.02e-05	XP_022858027.1	syntaxin-43-like	Olive
LOC111386164	-0.730053	-1.6587	0.0107314	0.0209404	XP_022866386.1	syntaxin-43-like	Olive
LOC111374199	-1.51781	-2.86356	1.41e-11	7.56e-11	XP_022852608.1	syntaxin-51-like	Olive
LOC111385918	-2.04188	-4.11781	2.13e-10	1.05e-09		syntaxin-51-like	Olive
LOC111402468	-0.916464	-1.88748	2.05e-06	6.97e-06	XP_022886566.1	syntaxin-51-like	Olive
LOC111393657	-4.05896	-16.6674	5.04e-42	9.78e-41	XP_022875074.1	syntaxin-71-like	Olive
LOC111376453	-0.625766	-1.54303	0.0012698	0.00292899	XP_022855179.1	syntaxin-81	Olive
LOC111383628	-2.56558	-5.91994	2.95e-13	1.77e-12	XP_022863512.1	syntaxin-81-like	Olive
LOC111390691	-0.437287	-1.35406	0.00266894	0.00582851	XP_022871533.1	TBC1_domain_family_member_15-like	Olive
LOC111390693	-1.36283	-2.57189	4.55e-05	0.000130194	XP_022871535.1	TBC1_domain_family_member_15-like	Olive
LOC111395641	-2.36547	-5.15322	8.38e-07	2.96e-06	XP_022877498.1	TBC1_domain_family_member_15-like	Olive
LOC111370913	-0.900882	-1.86721	1.81e-06	6.18e-06	XP_022848584.1	TBC1_domain_family_member_2B-like	Olive
LOC111366064	-0.420469	-1.33836	0.000426499	0.00105935	XP_022842480.1	TBC1_domain_family_member_5_homolog_A-like,_transcript_variant_X2	Olive
LOC111365929	-0.665702	-1.58634	4.16e-07	1.52e-06	XP_022842260.1	TBCC_domain-containing_protein_1-like,_transcript_variant_X2	Olive
LOC111379483	-1.40289	-2.64432	2.36e-25	2.6e-24	XP_022858624.1	transmembrane_protein_64-like	Olive
LOC111371778	-1.57735	-2.9842	4.09e-16	2.91e-15	XP_022849698.1	transmembrane_protein_64-like,_transcript_variant_X2	Olive
LOC111379094	-0.301443	-1.23238	0.0154033	0.0290798	XP_022858197.1	tubulin_alpha_chain-like	Olive
LOC111410172	-3.36375	-10.2941	1.77e-81	8.13e-80	XP_022896170.1	tubulin_alpha_chain-like	Olive
LOC111371391	-0.428173	-1.34553	0.00412799	0.00872066	XP_022849110.1	tubulin_alpha-3_chain	Olive
LOC111386092	-1.08363	-2.11936	0.000703852	0.00169153		tubulin_alpha-3_chain-like	Olive
LOC111412351	-0.735233	-1.66467	1.32e-08	5.59e-08	XP_022899015.1	tubulin_beta_chain	Olive
LOC111396968	-1.77395	-3.41988	2.47e-29	3.2e-28	XP_022879377.1	tubulin_beta_chain-like	Olive
LOC111397384	-1.59824	-3.02773	6.31e-25	6.83e-24	XP_022880052.1	tubulin_beta-1_chain	Olive
LOC111367589	-1.64082	-3.11843	8.66e-28	1.06e-26	XP_022844311.1	tubulin_beta-1_chain-like	Olive
LOC111392165	-1.62354	-3.0813	2.93e-25	3.21e-24	XP_022873200.1	tubulin_beta-1_chain-like	Olive
LOC111401274	-2.1203	-4.34785	2.73e-56	7.67e-55	XP_022884721.1	tubulin_beta-1_chain-like	Olive
LOC111391194	-0.821053	-1.76669	6.6e-06	2.1e-05	XP_022872123.1	tubulin_beta-5_chain,_transcript_variant_X2	Olive
LOC111366268	-0.869239	-1.8267	0.000560106	0.00136628	XP_022842762.1	vacuolar_protein_sorting-associated_protein_55_homolog	Olive
LOC111403129	-0.646676	-1.56556	0.0070697	0.0143074	XP_022887293.1	vacuolar_protein-sorting-associated_protein_37_homolog_1-like,_transcript_variant_X2	Olive
LOC111368255	-0.66058	-1.58072	1.19e-05	3.66e-05	XP_022845264.1	VAMP-like_protein_YKT61	Olive
LOC111404202	-1.54775	-2.92361	5.16e-06	1.66e-05	XP_022888741.1	VAMP-like_protein_YKT61,_transcript_variant_X2	Olive
LOC111374383	-0.988415	-1.984	0.00412812	0.00872066	XP_022852819.1	vesicle_transport_protein_GOT1,_transcript_variant_X3	Olive
LOC111367985	-1.42566	-2.68637	5.38e-08	2.15e-07	XP_022844911.1	vesicle_transport_v-SNARE_13-like	Olive
LOC111400885	-1.01594	-2.02222	8.34e-05	0.000230283	XP_022884103.1	vesicle_transport_v-SNARE_13-like,_transcript_variant_X2	Olive
LOC111375762	-1.27956	-2.42766	2.73e-08	1.13e-07	XP_022854401.1	vesicle-associated_membrane_protein_711-like	Olive
LOC111393918	-1.64557	-3.12871	5.14e-11	2.65e-10	XP_022875461.1	vesicle-associated_membrane_protein_711-like	Olive
LOC111403522	-1.47408	-2.77807	1.82e-23	1.86e-22	XP_022887831.1	vesicle-associated_membrane_protein_714	Olive
LOC111389348	-1.84134	-3.58344	1.18e-23	1.22e-22	XP_022870036.1	vesicle-associated_membrane_protein_714-like	Olive
LOC111383079	-1.2016	-2.29994	2.23e-10	1.1e-09	XP_022862915.1	vesicle-associated_membrane_protein_714-like,_transcript_variant_X2	Olive
LOC111374394	-3.0528	-8.29823	3.13e-42	6.13e-41	XP_022852827.1	vesicle-associated_membrane_protein_726	Olive
LOC111379459	-5.96088	-62.288	4.29e-23	4.3e-22	XP_022858598.1	vesicle-associated_membrane_protein_726	Olive
LOC111380337	-0.962049	-1.94807	4.3e-08	1.74e-07	XP_022859634.1	vesicle-associated_membrane_protein_727-like,_transcript_variant_X4	Olive
LOC111386937	-1.14222	-2.20721	0.00531981	0.0110241	XP_022867208.1	vesicle-associated_protein_1-1-like	Olive
LOC111389625	-0.913795	-1.88399	0.000215247	0.000559902	XP_022870321.1	vesicle-associated_protein_1-1-like	Olive
LOC111396395	-3.47104	-11.0888	9.39e-38	1.59e-36	XP_022878601.1	vesicle-associated_protein_1-1-like	Olive
LOC111409886	-1.36099	-2.56861	1.17e-13	7.17e-13	XP_022895750.1	vesicle-associated_protein_1-1-like	Olive
LOC111398441	-2.52766	-5.76637	3.35e-56	9.43e-55	XP_022881108.1	vesicle-associated_protein_1-1-like,_transcript_variant_X2	Olive
LOC111383384	-0.994228	-1.99201	0.00350663	0.00749532	XP_022863260.1	vesicle-associated_protein_1-2-like	Olive
LOC111377700	-2.72138	-6.59504	7.08e-40	1.29e-38	XP_022856597.1	vesicle-associated_protein_2-1,_transcript_variant_X2	Olive
LOC111396388	-1.2426	-2.36624	0.000234694	0.000607152	XP_022878595.1	vesicle-associated_protein_2-1-like	Olive
LOC111382588	-0.453526	-1.36938	0.0110843	0.021579	XP_022862377.1	vesicle-associated_protein_4-1-like	Olive
LOC111397510	-0.639068	-1.55732	0.00551992	0.0114093	XP_022880244.1	vesicle-associated_protein_4-1-like	Olive
LOC111375918	-0.464225	-1.37958	0.00426598	0.00898367	XP_022854604.1	vesicle-fusing_ATPase	Olive
LOC111394740	-0.555908	-1.47009	0.0102895	0.0201624	XP_022876476.1	vesicle-fusing_ATPase-like,_transcript_variant_X2	Olive

## Sheet: P28 vs. P14_UP
P28 vs. P14_UP
Genes	log2FoldChange	FoldChange	pvalue	padj	Gene_ID	description	Organism
LOC111397703	5.87356	58.6296	2.50521e-69	1.53187e-66	XP_022880469.1	non-specific_lipid-transfer_protein_2-like	Olive
LOC111402070	4.68717	25.762	3.08684e-48	8.30508e-46	XP_022885884.1	zinc_transporter_5-like,_transcript_variant_X2	Olive
LOC111389713	3.49441	11.27	1.21559e-09	2.30319e-08	XP_022870427.1	sucrose_transport_protein_SUC2-like,_transcript_variant_X2	Olive
LOC111400504	2.5531	5.86892	7.17432e-06	7.49548e-05	XP_022883687.1	ABC_transporter_F_family_member_1-like	Olive
LOC111382053	2.4519	5.47136	3.09614e-05	0.000283968		malonyl-CoA-acyl_carrier_protein_transacylase,_mitochondrial-like	Olive
LOC111372341	2.44981	5.46346	9.77453e-18	4.0431e-16	XP_022850400.1	zinc_transporter_5-like	Olive
LOC111376330	1.93405	3.82127	1.02948e-11	2.518e-10		UDP-xylose_transporter_1-like	Olive
LOC111408834	1.90905	3.75561	1.07318e-09	2.04836e-08	XP_022894396.1	lysosomal_amino_acid_transporter_1-like,_transcript_variant_X9	Olive
LOC111406050	1.89588	3.72148	4.67679e-28	4.19427e-26	XP_022891002.1	amino_acid_transporter_AVT6C-like,_transcript_variant_X2	Olive
LOC111366568	1.83877	3.57704	6.70477e-11	1.48347e-09	XP_022843066.1	aquaporin_TIP2-1-like	Olive
LOC111366546	1.73438	3.32737	3.35893e-10	6.82563e-09	XP_022843054.1	aquaporin_TIP2-1-like	Olive
LOC111400783	1.71758	3.28883	4.42274e-05	0.000391116	XP_022883950.1	CASP-like_protein_1F2	Olive
LOC111388715	1.71109	3.27407	1.3606e-06	1.61462e-05	XP_022869267.1	folate-biopterin_transporter_8,_chloroplastic	Olive
LOC111398893	1.69754	3.24347	5.83117e-05	0.000499638	XP_022881821.1	solute_carrier_family_40_member_2-like	Olive
LOC111385339	1.6655	3.17224	9.15402e-15	3.00937e-13	XP_022865493.1	protein_YLS3-like	Olive
LOC111403765	1.58883	3.00806	2.97862e-10	6.08221e-09	XP_022888153.1	non-specific_lipid-transfer_protein-like	Olive
LOC111372803	1.55972	2.94798	1.33216e-10	2.84276e-09	XP_022850975.1	UDP-xylose_transporter_1	Olive
LOC111372793	1.54753	2.92317	4.57642e-05	0.000402799	XP_022850968.1	protein_transport_protein_Sec61_subunit_beta	Olive
LOC111379032	1.53322	2.8943	0.000411954	0.00281022	XP_022858107.1	rop_guanine_nucleotide_exchange_factor_7-like	Olive
LOC111407199	1.4537	2.7391	0.000103004	0.00082637	XP_022892307.1	sodium/hydrogen_exchanger_5-like	Olive
LOC111375722	1.35745	2.56232	0.000170156	0.00128365	XP_022854357.1	oligopeptide_transporter_7-like,_transcript_variant_X3	Olive
LOC111408003	1.33854	2.52896	7.70159e-09	1.29054e-07	XP_022893509.1	non-specific_lipid-transfer_protein_1-like	Olive
LOC111370701	1.30883	2.47741	2.89449e-22	1.68416e-20	XP_022848307.1	zinc_transporter_1-like	Olive
LOC111407690	1.30883	2.47741	9.98197e-10	1.91284e-08	XP_022893094.1	protein_TONNEAU_1a-like,_transcript_variant_X2	Olive
LOC111385261	1.29094	2.44688	9.2577e-09	1.52995e-07	XP_022865406.1	aquaporin_TIP4-1-like	Olive
LOC111395482	1.25468	2.38614	1.40764e-17	5.76786e-16	XP_022877272.1	potassium_transporter_12,_transcript_variant_X2	Olive
LOC111382107	1.2165	2.32382	0.000436488	0.00295898	XP_022861747.1	non-specific_lipid-transfer_protein_1-like	Olive
LOC111393963	1.20987	2.31317	4.81562e-08	7.19477e-07	XP_022875523.1	aquaporin_TIP1-1-like	Olive
LOC111393813	1.18001	2.26579	6.2229e-08	9.16674e-07	XP_022875297.1	aquaporin_TIP1-2	Olive
LOC111384812	1.15797	2.23144	6.03345e-06	6.37884e-05		calcium-transporting_ATPase_11,_plasma_membrane-type	Olive
LOC111388435	1.14359	2.20929	1.00066e-09	1.91647e-08	XP_022868905.1	photosystem_I_reaction_center_subunit_IV_B,_chloroplastic-like	Olive
LOC111393814	1.09704	2.13915	4.77218e-08	7.13937e-07	XP_022875299.1	aquaporin_TIP1-2	Olive
LOC111375781	1.08065	2.11498	1.37501e-09	2.58197e-08	XP_022854432.1	secretory_carrier-associated_membrane_protein_1-like,_transcript_variant_X2	Olive
LOC111382517	1.07518	2.10699	2.85288e-07	3.80283e-06	XP_022862288.1	aquaporin_TIP4-1-like,_transcript_variant_X2	Olive
LOC111406287	1.06417	2.09097	2.86617e-05	0.000264596	XP_022891403.1	3-oxoacyl-[acyl-carrier-protein]_reductase_4-like	Olive
LOC111367368	1.06061	2.08581	7.84172e-09	1.31206e-07	XP_022843973.1	sugar_transporter_ERD6-like_16,_transcript_variant_X2	Olive
LOC111381595	1.04295	2.06044	0.000487726	0.0032557	XP_022861159.1	protein_CNGC15b-like	Olive
LOC111368600	1.03339	2.04683	0.000442725	0.00299282	XP_022845712.1	secretory_carrier-associated_membrane_protein_1-like,_transcript_variant_X2	Olive
LOC111386586	1.01153	2.01605	0.00178896	0.0100341		LOW_QUALITY_PROTEIN:_katanin_p60_ATPase-containing_subunit_A-like_2	Olive
LOC111374713	1.01094	2.01523	1.32414e-06	1.57414e-05	XP_022853203.1	lipid-transfer_protein_DIR1	Olive
LOC111405137	1.00571	2.00793	0.00095267	0.00583037	XP_022889660.1	sulfite_exporter_TauE/SafE_family_protein_3-like,_transcript_variant_X3	Olive
LOC111390030	1.00367	2.00509	8.15515e-09	1.36081e-07	XP_022870789.1	aquaporin_PIP1-1	Olive
LOC111394719	1.0015	2.00208	0.000439813	0.00297613	XP_022876438.1	xylulose_5-phosphate/phosphate_translocator,_chloroplastic-like	Olive
LOC111368652	0.981555	1.97459	1.60663e-06	1.88661e-05	XP_022845788.1	amino_acid_permease_8-like	Olive
LOC111375175	0.97502	1.96567	0.00282269	0.0147452	XP_022853743.1	ABC_transporter_C_family_member_10-like	Olive
LOC111377733	0.965205	1.95234	0.00136105	0.00793301	XP_022856629.1	ABC_transporter_B_family_member_15-like	Olive
LOC111391193	0.945266	1.92554	6.73824e-06	7.07505e-05		calcium-binding_protein_CML36	Olive
LOC111392014	0.939544	1.91792	0.00014568	0.00112011	XP_022873069.1	aquaporin_PIP-type_pTOM75	Olive
LOC111406067	0.937637	1.91539	3.71024e-05	0.000333367	XP_022891027.1	calcium-binding_protein_CML13	Olive
LOC111413003	0.931671	1.90748	1.44591e-10	3.0738e-09	XP_022899650.1	protein_NRT1/_PTR_FAMILY_3.1-like,_transcript_variant_X2	Olive
LOC111383500	0.91713	1.88835	1.45295e-07	2.02169e-06	XP_022863384.1	trafficking_protein_particle_complex_subunit_3-like	Olive
LOC111405292	0.904916	1.87244	0.000955516	0.00584484	XP_022889876.1	triose_phosphate/phosphate_translocator,_non-green_plastid,_chloroplastic-like	Olive
LOC111378327	0.903435	1.87051	1.22628e-07	1.72846e-06	XP_022857273.1	rop_guanine_nucleotide_exchange_factor_5-like	Olive
LOC111371288	0.892885	1.85689	0.000629568	0.00407017	XP_022848955.1	lipid-transfer_protein_DIR1	Olive
LOC111406068	0.857798	1.81227	2.05422e-05	0.000195433	XP_022891028.1	calcium-binding_protein_CML13	Olive
LOC111411282	0.8442	1.79527	4.86459e-10	9.76723e-09	XP_022897600.1	palmitoyl-acyl_carrier_protein_thioesterase,_chloroplastic-like	Olive
LOC111401491	0.84333	1.79419	0.0110539	0.0457317	XP_022885002.1	vacuolar_cation/proton_exchanger_3-like,_transcript_variant_X4	Olive
LOC111402238	0.842488	1.79314	1.61632e-06	1.89626e-05	XP_022886171.1	katanin_p60_ATPase-containing_subunit_A-like_2	Olive
LOC111404253	0.836279	1.78544	1.58204e-09	2.93954e-08		molybdate-anion_transporter-like	Olive
LOC111393802	0.826785	1.77373	5.87754e-08	8.70398e-07	XP_022875280.1	protein_YLS3-like	Olive
LOC111386376	0.826403	1.77326	0.00143366	0.00832015		ABC_transporter_G_family_member_40-like	Olive
LOC111395694	0.82117	1.76684	0.00403927	0.019986	XP_022877581.1	transmembrane_protein_184A-like	Olive
LOC111393670	0.818901	1.76406	3.75888e-05	0.000337376	XP_022875093.1	protein_NRT1/_PTR_FAMILY_2.6-like	Olive
LOC111397769	0.812144	1.75582	0.00571544	0.0266999	XP_022880519.1	CMP-sialic_acid_transporter_4-like	Olive
LOC111405062	0.796639	1.73705	1.95635e-07	2.67346e-06	XP_022889521.1	calcium-dependent_protein_kinase_13	Olive
LOC111390084	0.791172	1.73048	0.00095234	0.00582966		organic_cation/carnitine_transporter_7-like	Olive
LOC111372921	0.790713	1.72993	0.00123992	0.00732219	XP_022851117.1	copper-transporting_ATPase_PAA2,_chloroplastic-like	Olive
LOC111387785	0.787171	1.72569	0.00211222	0.0115356	XP_022868143.1	protein_NRT1/_PTR_FAMILY_4.3-like	Olive
LOC111367211	0.786793	1.72524	2.35389e-05	0.000221127	XP_022843734.1	cadmium/zinc-transporting_ATPase_HMA1,_chloroplastic	Olive
LOC111389161	0.785498	1.72369	0.000923331	0.00567315	XP_022869812.1	CMP-sialic_acid_transporter_4,_transcript_variant_X3	Olive
LOC111374687	0.784974	1.72306	0.000405354	0.00277251	XP_022853166.1	two-pore_potassium_channel_5-like,_transcript_variant_X2	Olive
LOC111369147	0.781952	1.71946	7.68783e-06	7.99472e-05	XP_022846396.1	protein_NRT1/_PTR_FAMILY_3.1-like	Olive
LOC111405283	0.780227	1.7174	0.00818455	0.0358495	XP_022889862.1	nucleobase-ascorbate_transporter_6-like,_transcript_variant_X3	Olive
LOC111379736	0.776652	1.71315	0.00369179	0.018498	XP_022858941.1	folate-biopterin_transporter_8,_chloroplastic	Olive
LOC111395494	0.775729	1.71205	6.75433e-05	0.000568742	XP_022877284.1	potassium_transporter_6-like	Olive
LOC111399707	0.773943	1.70994	0.00429137	0.0210568	XP_022882939.1	solute_carrier_family_35_member_F2-like,_transcript_variant_X5	Olive
LOC111398883	0.761668	1.69545	0.00778249	0.0344023	XP_022881797.1	WAT1-related_protein_At3g28050-like	Olive
LOC111408020	0.755646	1.68839	1.59098e-05	0.000155046	XP_022893542.1	mitochondrial_adenine_nucleotide_transporter_BTL3,_transcript_variant_X2	Olive
LOC111409533	0.753614	1.68601	8.94634e-08	1.2902e-06	XP_022895341.1	ABC_transporter_B_family_member_19-like	Olive
LOC111366597	0.74472	1.67565	0.00282458	0.0147505	XP_022843092.1	calcium-transporting_ATPase_9,_plasma_membrane-type-like	Olive
LOC111367213	0.741406	1.6718	1.65763e-05	0.000160981	XP_022843736.1	cadmium/zinc-transporting_ATPase_HMA1,_chloroplastic	Olive
LOC111402481	0.728946	1.65743	7.47982e-05	0.000624358	XP_022886594.1	two-pore_potassium_channel_1-like,_transcript_variant_X3	Olive
LOC111382593	0.728372	1.65677	0.000234203	0.00170413	XP_022862381.1	aquaporin_PIP2-1-like	Olive
LOC111392868	0.713801	1.64012	0.00031261	0.00220066	XP_022874041.1	oleoyl-acyl_carrier_protein_thioesterase,_chloroplastic-like	Olive
LOC111394626	0.709296	1.63501	0.00127859	0.00751622	XP_022876303.1	cationic_amino_acid_transporter_6,_chloroplastic-like	Olive
LOC111395644	0.702129	1.6269	0.0082097	0.0359366	XP_022877500.1	trafficking_protein_particle_complex_subunit_3-like	Olive
LOC111388780	0.701797	1.62653	0.00357596	0.0180143	XP_022869350.1	non-specific_lipid_transfer_protein_GPI-anchored_2	Olive
LOC111376977	0.693603	1.61732	0.00318621	0.0162924	XP_022855758.1	ABC_transporter/pleiotropic_drug_resistance_protein_1-like	Olive
LOC111367834	0.69161	1.61509	0.000825122	0.00514264	XP_022844666.1	CASP-like_protein_3A1	Olive
LOC111381380	0.686886	1.6098	2.45429e-05	0.000229725	XP_022860926.1	tyrosine-specific_transport_protein-like	Olive
LOC111369368	0.685188	1.60791	0.000334604	0.00234146	XP_022846622.1	rop_guanine_nucleotide_exchange_factor_7-like,_transcript_variant_X2	Olive
LOC111384809	0.678286	1.60024	0.00393661	0.0195528	XP_022864908.1	sugar_phosphate/phosphate_translocator_At3g14410	Olive
LOC111374135	0.677174	1.599	6.49788e-05	0.000549347	XP_022852532.1	nucleobase-ascorbate_transporter_6-like,_transcript_variant_X5	Olive
LOC111411619	0.675248	1.59687	0.00554994	0.0260611	XP_022897901.1	xylulose_5-phosphate/phosphate_translocator,_chloroplastic-like	Olive
LOC111372523	0.669585	1.59062	0.000119679	0.00094349	XP_022850639.1	protein_transport_protein_Sec24-like_At3g07100	Olive
LOC111387677	0.669221	1.59021	3.00727e-06	3.37012e-05	XP_022868020.1	molybdate-anion_transporter-like	Olive
LOC111403870	0.664894	1.58545	0.00150191	0.00865799	XP_022888273.1	UDP-URONIC_ACID_TRANSPORTER_1-like	Olive
LOC111392025	0.663876	1.58433	1.87259e-07	2.56316e-06		aquaporin_PIP-type	Olive
LOC111392248	0.663704	1.58414	0.00295655	0.0153113	XP_022873303.1	SEC1_family_transport_protein_SLY1-like	Olive
LOC111403179	0.662721	1.58307	0.00525862	0.0249299	XP_022887351.1	phosphatidylinositol:ceramide_inositolphosphotransferase_2-like	Olive
LOC111407573	0.661596	1.58183	0.000174977	0.00131677	XP_022892912.1	aquaporin_PIP1-2	Olive
LOC111401885	0.656593	1.57636	9.22149e-05	0.000750135	XP_022885618.1	calcium_sensing_receptor,_chloroplastic	Olive
LOC111379793	0.656383	1.57613	0.000159394	0.0012117	XP_022859001.1	protein_transport_protein_SEC13_homolog_B-like	Olive
LOC111369274	0.656162	1.57588	0.00438216	0.0214366	XP_022846492.1	acyl-acyl_carrier_protein_thioesterase_ATL1,_chloroplastic-like	Olive
LOC111405932	0.653911	1.57343	0.00229484	0.0123761	XP_022890816.1	malonyl_CoA-acyl_carrier_protein_transacylase	Olive
LOC111389806	0.651743	1.57107	0.000322048	0.00226065	XP_022870552.1	nucleotide-sugar_uncharacterized_transporter_1-like	Olive
LOC111398703	0.631799	1.5495	1.82235e-05	0.000175357	XP_022881513.1	cyclic_nucleotide-gated_ion_channel_14	Olive
LOC111399506	0.627339	1.54471	0.000880484	0.00543631	XP_022882630.1	tetraspanin-2	Olive
LOC111397089	0.623921	1.54106	6.06367e-05	0.000517903	XP_022879601.1	coronatine-insensitive_protein_homolog_1b-like,_transcript_variant_X2	Olive
LOC111392289	0.620778	1.5377	0.00152934	0.00879048	XP_022873368.1	amino_acid_permease_7	Olive
LOC111367765	0.620676	1.5376	4.54211e-05	0.000400408	XP_022844585.1	CSC1-like_protein_At1g32090,_transcript_variant_X2	Olive
LOC111385840	0.620507	1.53742	0.000386677	0.00265991	XP_022866039.1	vacuolar_cation/proton_exchanger_3-like,_transcript_variant_X6	Olive
LOC111368033	0.619606	1.53646	0.00728496	0.0326624	XP_022844965.1	ABC_transporter_A_family_member_7-like	Olive
LOC111389580	0.617119	1.53381	0.00436615	0.0213707	XP_022870273.1	mitochondrial_pyruvate_carrier_4-like	Olive
LOC111367054	0.612871	1.5293	0.0091778	0.0393096	XP_022843513.1	zinc_transporter_11-like	Olive
LOC111392177	0.609746	1.52599	0.000123294	0.000967223	XP_022873246.1	calcium-binding_protein_CML13	Olive
LOC111410892	0.60708	1.52317	0.000556639	0.00365346	XP_022897254.1	acyl_carrier_protein_1,_mitochondrial-like	Olive
LOC111403773	0.602257	1.51809	0.00502284	0.0239982	XP_022888164.1	purine_permease_5,_transcript_variant_X3	Olive
LOC111402524	0.599058	1.51473	4.4882e-05	0.000396383	XP_022886667.1	choline_transporter_protein_1,_transcript_variant_X3	Olive
LOC111401213	0.596136	1.51166	0.000241636	0.0017529	XP_022884613.1	mitochondrial_carnitine/acylcarnitine_carrier-like_protein,_transcript_variant_X2	Olive
LOC111396701	0.593649	1.50906	0.000561061	0.0036789	XP_022878937.1	sugar_phosphate/phosphate_translocator_At3g17430,_transcript_variant_X4	Olive
LOC111383030	0.593512	1.50892	0.000788063	0.00495112	XP_022862856.1	ELMO_domain-containing_protein_A-like,_transcript_variant_X3	Olive
LOC111376716	0.593427	1.50883	0.00171891	0.00970921	XP_022855463.1	mechanosensitive_ion_channel_protein_6-like	Olive
LOC111408127	0.582643	1.49759	0.00262353	0.0138577	XP_022893699.1	secretory_carrier-associated_membrane_protein_4	Olive
LOC111370752	0.580735	1.49561	3.94423e-05	0.000352788	XP_022848384.1	transmembrane_protein_184_homolog_DDB_G0279555-like,_transcript_variant_X2	Olive
LOC111403971	0.579813	1.49466	0.0112289	0.0463305	XP_022888435.1	calcium-dependent_protein_kinase_2-like,_transcript_variant_X2	Olive
LOC111397557	0.579675	1.49451	3.30379e-05	0.000301029	XP_022880316.1	rop_guanine_nucleotide_exchange_factor_1-like	Olive
LOC111380084	0.577555	1.49232	0.000403814	0.00276479	XP_022859316.1	copper-transporting_ATPase_PAA2,_chloroplastic-like	Olive
LOC111409352	0.57471	1.48938	0.00134925	0.00787518	XP_022895178.1	monosaccharide-sensing_protein_2-like,_transcript_variant_X2	Olive
LOC111383883	0.570977	1.48553	0.0103678	0.0434058	XP_022863836.1	transmembrane_protein_184B,_transcript_variant_X3	Olive
LOC111410745	0.5656	1.48	0.000556313	0.00365203	XP_022897012.1	magnesium_transporter_NIPA4,_transcript_variant_X2	Olive
LOC111378907	0.563985	1.47835	0.00145985	0.00845613	XP_022857954.1	phosphate_transporter_PHO1_homolog_9-like	Olive
LOC111372246	0.548649	1.46272	0.000639281	0.00412661	XP_022850258.1	protein_NRT1/_PTR_FAMILY_5.10-like	Olive
LOC111398288	0.539436	1.4534	0.00302297	0.0155881	XP_022880978.1	calcium-dependent_protein_kinase_13-like	Olive
LOC111392087	0.538824	1.45279	0.000249019	0.00179831	XP_022873133.1	inositol_transporter_1-like,_transcript_variant_X2	Olive
LOC111397591	0.532139	1.44607	0.000961781	0.00587569	XP_022880355.1	zinc_transporter_4,_chloroplastic	Olive
LOC111393927	0.529086	1.44301	0.000923399	0.00567315	XP_022875478.1	sugar_phosphate/phosphate_translocator_At2g25520	Olive
LOC111409766	0.522845	1.43679	0.00225366	0.0121834	XP_022895556.1	non-specific_lipid-transfer_protein-like_protein_At2g13820	Olive
LOC111377530	0.520833	1.43478	0.0108943	0.0452218	XP_022856425.1	protein_YLS3	Olive
LOC111385815	0.520631	1.43458	0.000420029	0.00285961	XP_022866004.1	oleoyl-acyl_carrier_protein_thioesterase_1,_chloroplastic-like	Olive
LOC111397828	0.515236	1.42923	0.00673764	0.0306166	XP_022880573.1	sugar_phosphate/phosphate_translocator_At3g11320	Olive
LOC111406266	0.5122	1.42622	0.000209869	0.00154919	XP_022891359.1	ABC_transporter_C_family_member_8	Olive
LOC111385397	0.495688	1.40999	0.00161764	0.00921615	XP_022865551.1	protein_TRANSPORT_INHIBITOR_RESPONSE_1-like,_transcript_variant_X4	Olive
LOC111402698	0.485487	1.40006	0.000822937	0.00513187	XP_022886823.1	photosystem_I_reaction_center_subunit_IV_B,_chloroplastic-like	Olive
LOC111406347	0.47711	1.39195	0.00930426	0.0397752	XP_022891524.1	potassium_transporter_6-like,_transcript_variant_X6	Olive
LOC111386290	0.472127	1.38715	0.000212532	0.00156678	XP_022866774.1	potassium_transporter_2-like,_transcript_variant_X5	Olive
LOC111365410	0.470086	1.38519	0.00194768	0.0107789	XP_022841704.1	metal-nicotianamine_transporter_YSL6,_transcript_variant_X3	Olive
LOC111378740	0.464195	1.37955	0.00250231	0.0133199		aquaporin_PIP2-7-like	Olive
LOC111386344	0.464024	1.37938	0.011654	0.0477707	XP_022866575.1	CTL-like_protein_DDB_G0274487	Olive
LOC111400866	0.463849	1.37922	0.00173776	0.00979428	XP_022884075.1	WAT1-related_protein_At5g40240-like	Olive
LOC111390667	0.463104	1.3785	0.00220788	0.0119705	XP_022871497.1	proline_transporter_1-like,_transcript_variant_X3	Olive
LOC111375795	0.443855	1.36023	0.0094957	0.040465	XP_022854457.1	protein_LAZ1-like	Olive
LOC111409132	0.437818	1.35455	0.0107598	0.044785	XP_022894858.1	amino_acid_permease_3-like	Olive
LOC111412963	0.43769	1.35443	0.00350004	0.0176662	XP_022899586.1	palmitoyl-acyl_carrier_protein_thioesterase,_chloroplastic-like,_transcript_variant_X2	Olive
LOC111397675	0.42581	1.34333	0.00742689	0.0331837	XP_022880452.1	biotin_carboxyl_carrier_protein_of_acetyl-CoA_carboxylase,_transcript_variant_X2	Olive
LOC111382816	0.416805	1.33497	0.00904551	0.0388617	XP_022862625.1	plastidic_glucose_transporter_4,_transcript_variant_X2	Olive
LOC111388217	0.414819	1.33313	0.00226123	0.0122204	XP_022868671.1	aquaporin_PIP1-1-like	Olive
LOC111407461	0.408908	1.32768	0.00487571	0.0234049	XP_022892712.1	mechanosensitive_ion_channel_protein_10-like	Olive
LOC111396979	0.399395	1.31895	0.00419746	0.0206805	XP_022879401.1	ras_GTPase-activating_protein-binding_protein_2-like,_transcript_variant_X4	Olive
LOC111401397	0.386517	1.30723	0.00698727	0.0315464	XP_022884881.1	transport_inhibitor_response_1-like_protein	Olive
LOC111376872	0.386069	1.30683	0.00483203	0.0232284	XP_022855644.1	CTL-like_protein_DDB_G0288717	Olive
LOC111379782	0.383787	1.30476	0.00601987	0.0278441	XP_022858990.1	aquaporin_PIP2-8	Olive
LOC111379341	0.37845	1.29994	0.0118868	0.0485388	XP_022858467.1	calcium-transporting_ATPase_1-like	Olive
LOC111393215	0.370891	1.29315	0.00827743	0.0361765	XP_022874413.1	UDP-xylose_transporter_3,_transcript_variant_X5	Olive
LOC111407332	0.345631	1.27071	0.00904259	0.0388541	XP_022892517.1	ADP,ATP_carrier_protein_1,_mitochondrial-like,_transcript_variant_X2	Olive
LOC111397133	0.448774	1.36488	0.00409059	0.0202131	LOC111397133	XP_022879652.1	actin-7-like	Olive
LOC111401141	0.326717	1.25416	0.00775636	0.0343049	LOC111401141	XP_022884507.1	actin-7-like	Olive
LOC111403700	0.650813	1.57005	0.00258501	0.0136885	LOC111403700		actin-85C-like	Olive
LOC111399692	0.7732	1.70906	3.54823e-07	4.66135e-06	LOC111399692	XP_022882916.1	actin-97-like	Olive
LOC111402393	0.797828	1.73848	1.01859e-05	0.000103275	LOC111402393	XP_022886431.1	bet1-like_SNARE_1-1,_transcript_variant_X2	Olive
LOC111391426	0.935587	1.91267	0.000321239	0.00225592	LOC111391426	XP_022872412.1	bet1-like_SNARE_1-1,_transcript_variant_X3	Olive
LOC111377553	0.445481	1.36177	0.00240211	0.0128451	LOC111377553	XP_022856450.1	dynamin-related_protein_1E-like	Olive
LOC111410392	0.76661	1.70127	1.2037e-05	0.000120517	LOC111410392	XP_022896472.1	dynamin-related_protein_5A	Olive
LOC111380395	0.5023	1.41647	0.00163985	0.00933003	LOC111380395	XP_022859719.1	dynamin-related_protein_5A	Olive
LOC111407439	0.752202	1.68436	4.83297e-05	0.000423054	LOC111407439	XP_022892674.1	Golgi_SNAP_receptor_complex_member_1-1	Olive
LOC111368258	0.65297	1.5724	0.0108335	0.045036	LOC111368258	XP_022845266.1	Golgi_SNAP_receptor_complex_member_1-1-like	Olive
LOC111393732	1.48179	2.79295	1.94617e-11	4.60602e-10	LOC111393732	XP_022875188.1	GPN-loop_GTPase_3,_transcript_variant_X7	Olive
LOC111388940	0.73417	1.66344	2.83689e-06	3.19837e-05	LOC111388940	XP_022869540.1	kinesin-like_protein_KIN-10B,_transcript_variant_X3	Olive
LOC111390802	0.5849	1.49994	0.00184555	0.0103068	LOC111390802	XP_022871686.1	kinesin-like_protein_KIN-10C,_transcript_variant_X2	Olive
LOC111396648	0.601702	1.51751	0.00341	0.0172753	LOC111396648	XP_022878849.1	kinesin-like_protein_KIN-12B	Olive
LOC111390852	0.576139	1.49085	0.011055	0.0457317	LOC111390852	XP_022871747.1	kinesin-like_protein_KIN-12B	Olive
LOC111395766	0.964321	1.95114	0.00212952	0.0116131	LOC111395766	XP_022877670.1	kinesin-like_protein_KIN-12F	Olive
LOC111367060	0.722691	1.65026	0.012132	0.0493006	LOC111367060	XP_022843524.1	kinesin-like_protein_KIN-12F,_transcript_variant_X2	Olive
LOC111368007	0.634507	1.55241	0.00295001	0.0152845	LOC111368007	XP_022844935.1	kinesin-like_protein_KIN-13B,_transcript_variant_X2	Olive
LOC111378621	0.69712	1.62127	0.0106957	0.044579	LOC111378621	XP_022857620.1	kinesin-like_protein_KIN-14F	Olive
LOC111369858	0.920871	1.89326	0.00137101	0.00798968	LOC111369858	XP_022847322.1	kinesin-like_protein_KIN-14I,_transcript_variant_X2	Olive
LOC111397318	0.760397	1.69396	0.00140081	0.0081464	LOC111397318	XP_022879937.1	kinesin-like_protein_KIN-14N	Olive
LOC111395653	0.739859	1.67001	0.0114114	0.0469412	LOC111395653	XP_022877512.1	kinesin-like_protein_KIN-14N	Olive
LOC111408281	0.817089	1.76185	0.00959443	0.0407464	LOC111408281	XP_022893829.1	kinesin-like_protein_KIN-14R	Olive
LOC111371363	0.777069	1.71365	0.00515618	0.0245134	LOC111371363	XP_022849071.1	kinesin-like_protein_KIN-5D,_transcript_variant_X2	Olive
LOC111410085	0.738888	1.66889	0.000565954	0.00370881	LOC111410085	XP_022896035.1	kinesin-like_protein_KIN-7D,_mitochondrial,_transcript_variant_X2	Olive
LOC111374916	1.11702	2.16898	0.000221931	0.00162787	LOC111374916	XP_022853442.1	kinesin-like_protein_KIN-7D,_mitochondrial,_transcript_variant_X6	Olive
LOC111385588	0.681767	1.6041	0.00475201	0.0229125	LOC111385588	XP_022865764.1	kinesin-like_protein_KIN-7E,_chloroplastic,_transcript_variant_X2	Olive
LOC111410092	1.17355	2.25567	7.74601e-05	0.00064402	LOC111410092	XP_022896056.1	kinesin-like_protein_KIN-7E,_transcript_variant_X9	Olive
LOC111367380	0.603701	1.51961	0.00540416	0.0254741	LOC111367380	XP_022843986.1	kinesin-like_protein_KIN-7G	Olive
LOC111401377	0.957738	1.94226	0.00112996	0.00674983	LOC111401377	XP_022884851.1	kinesin-like_protein_KIN-7N	Olive
LOC111380424	0.518979	1.43294	0.00865521	0.0375301	LOC111380424	XP_022859753.1	kinesin-like_protein_KIN-8B,_transcript_variant_X3	Olive
LOC111382164	0.652637	1.57204	0.00339991	0.0172306	LOC111382164	XP_022862054.1	kinesin-like_protein_KIN-UC,_transcript_variant_X4	Olive
LOC111383616	1.22616	2.33943	0.00604766	0.0279457	LOC111383616		kinesin-like_protein_NACK1	Olive
LOC111377815	0.678479	1.60045	0.00890789	0.0384049	LOC111377815	XP_022856710.1	kinesin-like_protein_NACK1,_transcript_variant_X2	Olive
LOC111393331	0.796517	1.7369	0.00359954	0.0181113	LOC111393331	XP_022874591.1	myosin-6-like	Olive
LOC111390254	0.928216	1.90292	0.000420213	0.00286018	LOC111390254	XP_022871034.1	novel_plant_SNARE_11-like	Olive
LOC111371552	0.603062	1.51894	0.0019419	0.0107503	LOC111371552	XP_022849371.1	novel_plant_SNARE_12-like	Olive
LOC111400615	1.88251	3.68716	0.0048946	0.0234789	LOC111400615	XP_022883785.1	probable_F-actin-capping_protein_subunit_beta	Olive
LOC111390494	0.450501	1.36652	0.000732911	0.00464453	LOC111390494	XP_022871310.1	protein_KINESIN_LIGHT_CHAIN-RELATED_1-like	Olive
LOC111396930	1.62509	3.08462	6.13993e-07	7.76285e-06	LOC111396930	XP_022879314.1	protein_KINESIN_LIGHT_CHAIN-RELATED_2-like	Olive
LOC111384936	0.984469	1.97859	1.10356e-07	1.56731e-06	LOC111384936		protein_KINESIN_LIGHT_CHAIN-RELATED_3-like	Olive
LOC111368119	0.716127	1.64277	0.000453398	0.00305698	LOC111368119	XP_022845104.1	protein_KINESIN_LIGHT_CHAIN-RELATED_3-like	Olive
LOC111392164	1.86902	3.65284	3.49679e-20	1.74481e-18	LOC111392164	XP_022873198.1	rac-like_GTP-binding_protein_5	Olive
LOC111401975	0.839954	1.78999	6.58516e-05	0.000556034	LOC111401975	XP_022885743.1	rac-like_GTP-binding_protein_ARAC1	Olive
LOC111410525	0.665621	1.58625	0.00574227	0.0267848	LOC111410525	XP_022896678.1	rac-like_GTP-binding_protein_ARAC3	Olive
LOC111411069	0.545025	1.45905	0.011114	0.0459409	LOC111411069	XP_022897411.1	rac-like_GTP-binding_protein_ARAC7	Olive
LOC111366378	0.914555	1.88499	0.00606772	0.0280346	LOC111366378	XP_022842923.1	rac-like_GTP-binding_protein_ARAC7,_transcript_variant_X2	Olive
LOC111383786	1.41288	2.66268	1.73739e-05	0.000167951	LOC111383786	XP_022863708.1	rac-like_GTP-binding_protein_RAC13	Olive
LOC111396979	0.399395	1.31895	0.00419746	0.0206805	LOC111396979	XP_022879401.1	ras_GTPase-activating_protein-binding_protein_2-like,_transcript_variant_X4	Olive
LOC111405882	0.714441	1.64085	2.35511e-05	0.000221181	LOC111405882	XP_022890743.1	ras-related_protein_Rab2BV	Olive
LOC111407806	0.609421	1.52565	0.00468863	0.0226556	LOC111407806	XP_022893252.1	ras-related_protein_Rab2BV-like,_transcript_variant_X2	Olive
LOC111407891	0.791178	1.73049	0.00268003	0.0141118	LOC111407891	XP_022893357.1	ras-related_protein_Rab7	Olive
LOC111397396	0.754834	1.68744	6.87072e-05	0.000577951	LOC111397396	XP_022880069.1	ras-related_protein_Rab7,_transcript_variant_X2	Olive
LOC111380462	1.30785	2.47573	0.0123126	0.0498959	LOC111380462	XP_022859815.1	ras-related_protein_Rab7,_transcript_variant_X2	Olive
LOC111370504	1.41518	2.66692	1.82085e-11	4.3277e-10	LOC111370504	XP_022847990.1	ras-related_protein_RABA1c	Olive
LOC111412153	0.563192	1.47753	0.000460161	0.00309699	LOC111412153	XP_022898711.1	ras-related_protein_RABA1d-like	Olive
LOC111382931	0.44803	1.36418	0.00768401	0.0340476	LOC111382931	XP_022862741.1	ras-related_protein_RABA1f	Olive
LOC111375629	0.852304	1.80538	2.47774e-05	0.000231662	LOC111375629	XP_022854250.1	ras-related_protein_RABA2a-like	Olive
LOC111381327	0.395133	1.31506	0.00268769	0.0141411	LOC111381327	XP_022860877.1	ras-related_protein_RABA3	Olive
LOC111403849	1.40781	2.65333	4.58751e-05	0.000403564	LOC111403849	XP_022888249.1	ras-related_protein_RABA4d-like	Olive
LOC111372135	0.628823	1.5463	0.00157347	0.00900107	LOC111372135	XP_022850088.1	ras-related_protein_RABA6b-like	Olive
LOC111368455	1.09894	2.14198	0.000178027	0.00133673	LOC111368455	XP_022845481.1	ras-related_protein_RABC2a-like,_transcript_variant_X4	Olive
LOC111389286	0.392626	1.31278	0.0118932	0.048559	LOC111389286	XP_022869992.1	ras-related_protein_RABD2a	Olive
LOC111405542	0.595752	1.51126	0.000798888	0.00500697	LOC111405542	XP_022890250.1	ras-related_protein_RABD2a-like	Olive
LOC111392456	0.825443	1.77208	0.000161602	0.0012271	LOC111392456	XP_022873574.1	ras-related_protein_RABF2a-like	Olive
LOC111408001	1.59201	3.0147	3.17867e-07	4.19881e-06	LOC111408001	XP_022893510.1	ras-related_protein_RABH1e	Olive
LOC111403288	0.888533	1.85129	0.002516	0.013378	LOC111403288	XP_022887495.1	reticulon-like_protein_B12,_transcript_variant_X2	Olive
LOC111379521	0.56662	1.48105	4.13058e-05	0.000367988	LOC111379521	XP_022858682.1	reticulon-like_protein_B17,_transcript_variant_X4	Olive
LOC111371775	0.508065	1.42214	0.000295856	0.00210003	LOC111371775	XP_022849695.1	reticulon-like_protein_B2	Olive
LOC111390360	0.513621	1.42763	0.00134515	0.00785855	LOC111390360	XP_022871159.1	reticulon-like_protein_B2	Olive
LOC111403768	0.829925	1.77759	0.000918536	0.0056483	LOC111403768	XP_022888156.1	reticulon-like_protein_B21,_transcript_variant_X3	Olive
LOC111406118	1.03299	2.04626	1.6014e-11	3.82776e-10	LOC111406118	XP_022891102.1	reticulon-like_protein_B5	Olive
LOC111396580	0.748035	1.6795	0.000170618	0.00128675	LOC111396580	XP_022878753.1	reticulon-like_protein_B5	Olive
LOC111396782	0.659943	1.58002	1.52818e-05	0.000149272	LOC111396782	XP_022879060.1	rho_GDP-dissociation_inhibitor_1-like	Olive
LOC111407167	1.49191	2.81261	2.44611e-27	2.12024e-25	LOC111407167	XP_022892263.1	rho_GDP-dissociation_inhibitor_1-like,_transcript_variant_X3	Olive
LOC111404053	1.30984	2.47915	5.21847e-07	6.66548e-06	LOC111404053	XP_022888541.1	rho_GTPase-activating_protein_1-like	Olive
LOC111395168	0.51879	1.43275	0.000501967	0.00333894	LOC111395168	XP_022876941.1	rho_GTPase-activating_protein_2-like	Olive
LOC111405750	0.463009	1.37841	0.0104212	0.0435915	LOC111405750	XP_022890541.1	rho_GTPase-activating_protein_2-like	Olive
LOC111385743	0.901434	1.86792	0.000203979	0.00150903	LOC111385743	XP_022865929.1	rho_GTPase-activating_protein_3-like	Olive
LOC111384313	1.89016	3.70677	5.10716e-07	6.53324e-06	LOC111384313		rho_GTPase-activating_protein_4-like	Olive
LOC111412547	0.750414	1.68228	7.15141e-05	0.000599474	LOC111412547	XP_022899251.1	rho_GTPase-activating_protein_5-like	Olive
LOC111407320	0.930298	1.90567	0.00107285	0.00646033	LOC111407320	XP_022892504.1	rho_GTPase-activating_protein_6-like	Olive
LOC111389772	0.753746	1.68617	0.00177139	0.00995546	LOC111389772	XP_022870504.1	SNARE-interacting_protein_KEULE-like	Olive
LOC111386566	0.649692	1.56883	0.00778021	0.0343968	LOC111386566	XP_022866799.1	SNARE-interacting_protein_KEULE-like	Olive
LOC111391784	0.6324	1.55014	0.00803004	0.0353168	LOC111391784	XP_022872815.1	syntaxin-112-like	Olive
LOC111373493	0.709049	1.63473	0.00234766	0.0126145	LOC111373493	XP_022851792.1	syntaxin-132-like	Olive
LOC111378957	0.496556	1.41084	0.00637264	0.0292306	LOC111378957	XP_022858027.1	syntaxin-43-like	Olive
LOC111402468	0.479061	1.39384	0.00315827	0.0161692	LOC111402468	XP_022886566.1	syntaxin-51-like	Olive
LOC111399672	0.904218	1.87153	2.8672e-05	0.000264618	LOC111399672	XP_022882882.1	syntaxin-71-like	Olive
LOC111404726	0.729776	1.65838	0.00832218	0.0363343	LOC111404726	XP_022889260.1	syntaxin-71-like	Olive
LOC111393679	0.448061	1.36421	0.00132451	0.00774956	LOC111393679	XP_022875104.1	syntaxin-related_protein_KNOLLE-like	Olive
LOC111410172	0.90112	1.86751	1.06376e-10	2.29329e-09	LOC111410172	XP_022896170.1	tubulin_alpha_chain-like	Olive
LOC111379094	0.785384	1.72355	2.20191e-08	3.46687e-07	LOC111379094	XP_022858197.1	tubulin_alpha_chain-like	Olive
LOC111379087	0.690211	1.61352	6.02932e-05	0.000515303	LOC111379087	XP_022858184.1	tubulin_alpha-3_chain-like	Olive
LOC111386092	1.00597	2.00829	0.00548744	0.0258037	LOC111386092		tubulin_alpha-3_chain-like	Olive
LOC111396968	0.395186	1.31511	0.00573494	0.0267617	LOC111396968	XP_022879377.1	tubulin_beta_chain-like	Olive
LOC111387259	0.705058	1.63021	5.57733e-09	9.55046e-08	LOC111387259	XP_022867570.1	tubulin_beta-1_chain	Olive
LOC111406684	0.498396	1.41264	6.13619e-05	0.00052271	LOC111406684	XP_022891837.1	tubulin_beta-1_chain	Olive
LOC111397384	0.495158	1.40948	0.000124343	0.000974091	LOC111397384	XP_022880052.1	tubulin_beta-1_chain	Olive
LOC111392165	0.798722	1.73956	8.88346e-06	9.11965e-05	LOC111392165	XP_022873200.1	tubulin_beta-1_chain-like	Olive
LOC111393223	0.45658	1.37228	0.000869163	0.00538123	LOC111393223	XP_022874431.1	tubulin_beta-1_chain-like	Olive
LOC111399979	0.535692	1.44964	1.81719e-05	0.000174961	LOC111399979	XP_022883229.1	tubulin_beta-2_chain	Olive
LOC111391194	1.02856	2.03999	6.54893e-13	1.82475e-11	LOC111391194	XP_022872123.1	tubulin_beta-5_chain,_transcript_variant_X2	Olive
LOC111375331	1.27515	2.42024	1.00054e-16	3.87663e-15	LOC111375331	XP_022853904.1	tubulin_beta-5_chain-like	Olive
LOC111367166	0.695895	1.61989	0.00469003	0.0226592	LOC111367166	XP_022843669.1	vesicle_transport_v-SNARE_13-like	Olive
LOC111375762	0.507052	1.42114	0.0015506	0.00889447	LOC111375762	XP_022854401.1	vesicle-associated_membrane_protein_711-like	Olive
LOC111380337	0.383831	1.3048	0.00863435	0.0374686	LOC111380337	XP_022859634.1	vesicle-associated_membrane_protein_727-like,_transcript_variant_X4	Olive
LOC111371473	0.868874	1.82624	0.000455438	0.00306766	LOC111371473	XP_022849258.1	vesicle-associated_protein_2-2,_transcript_variant_X4	Olive
LOC111366053	0.727927	1.65626	0.00501246	0.0239588	LOC111366053	XP_022842467.1	vesicle-associated_protein_2-2-like,_transcript_variant_X2	Olive
LOC111389332	1.02376	2.03321	0.00560391	0.0262523	LOC111389332	XP_022870019.1	vesicle-fusing_ATPase-like	Olive

## Sheet: P28 vs. P14_DOWN
P28 vs. P14_DOWN
Genes	log2FoldChange	FoldChange	pvalue	padj	Gene_ID	description	Organism
LOC111378049	-0.369178	-1.29162	0.00799927	0.0352125	XP_022856978.1	aquaporin_PIP1-4	Olive
LOC111409809	-0.386547	-1.30726	0.0120172	0.0489522	XP_022895638.1	chloride_channel_protein_CLC-c-like	Olive
LOC111378200	-0.387824	-1.30842	0.0108563	0.0451028	XP_022857135.1	cyclic_nucleotide-gated_ion_channel_14	Olive
LOC111393332	-0.389086	-1.30956	0.00282548	0.0147529	XP_022874592.1	ABC_transporter_F_family_member_4	Olive
LOC111369645	-0.397222	-1.31697	0.010481	0.0438253	XP_022847009.1	calcium-transporting_ATPase_4,_endoplasmic_reticulum-type-like,_transcript_variant_X2	Olive
LOC111403344	-0.401665	-1.32103	0.00198748	0.0109665	XP_022887574.1	potassium_transporter_12,_transcript_variant_X3	Olive
LOC111405473	-0.415394	-1.33366	0.011673	0.0478227	XP_022890138.1	proline_transporter_2-like	Olive
LOC111412967	-0.424716	-1.34231	0.00109912	0.00659725	XP_022899590.1	cationic_amino_acid_transporter_2,_vacuolar-like	Olive
LOC111402869	-0.439648	-1.35627	0.0100265	0.0422028	XP_022886940.1	GABA_transporter_2	Olive
LOC111403345	-0.446985	-1.36319	0.00314153	0.0160958	XP_022887579.1	potassium_transporter_6-like,_transcript_variant_X5	Olive
LOC111395849	-0.455959	-1.37169	0.0048176	0.0231723	XP_022877808.1	chloride_channel_protein_CLC-f-like	Olive
LOC111377799	-0.463739	-1.37911	0.000786198	0.00494125	XP_022856696.1	two_pore_calcium_channel_protein_1A-like,_transcript_variant_X3	Olive
LOC111400082	-0.470559	-1.38565	0.0052714	0.0249659	XP_022883327.1	ATPase_GET3-like,_transcript_variant_X6	Olive
LOC111394784	-0.481433	-1.39613	0.00932706	0.0398423	XP_022876535.1	magnesium_transporter_NIPA4	Olive
LOC111371402	-0.493416	-1.40777	0.00357206	0.018	XP_022849138.1	peroxisomal_nicotinamide_adenine_dinucleotide_carrier-like,_transcript_variant_X6	Olive
LOC111387965	-0.494177	-1.40852	0.000600754	0.00391095	XP_022868377.1	protein_NRT1/_PTR_FAMILY_2.13	Olive
LOC111371266	-0.496982	-1.41126	0.00329296	0.0167618	XP_022848925.1	protein_NUCLEAR_FUSION_DEFECTIVE_4-like	Olive
LOC111402320	-0.498035	-1.41229	0.000727552	0.00461492	XP_022886310.1	sugar_carrier_protein_C-like	Olive
LOC111372639	-0.500666	-1.41487	0.0112834	0.0465094	XP_022850791.1	calcium-binding_protein_CML24-like	Olive
LOC111412527	-0.505609	-1.41972	0.0112564	0.0464326	XP_022899233.1	ammonium_transporter_3_member_3-like	Olive
LOC111392008	-0.509604	-1.42366	0.0040189	0.0198998	XP_022873066.1	polyamine_transporter_At1g31830,_transcript_variant_X2	Olive
LOC111398714	-0.514819	-1.42882	0.000115406	0.000914305	XP_022881533.1	ABC_transporter_G_family_member_32-like,_transcript_variant_X2	Olive
LOC111370485	-0.517663	-1.43163	0.00682088	0.030903	XP_022847972.1	cationic_amino_acid_transporter_1-like,_transcript_variant_X3	Olive
LOC111407715	-0.524217	-1.43815	0.00312906	0.0160466	XP_022893126.1	calcium-transporting_ATPase_4,_endoplasmic_reticulum-type-like,_transcript_variant_X2	Olive
LOC111369695	-0.540024	-1.454	0.00240868	0.0128725	XP_022847070.1	sodium-dependent_phosphate_transport_protein_1,_chloroplastic-like,_transcript_variant_X2	Olive
LOC111408788	-0.551836	-1.46595	0.000347708	0.00242509	XP_022894324.1	cyclic_nucleotide-gated_ion_channel_1-like	Olive
LOC111371443	-0.560334	-1.47461	0.00535419	0.0252903	XP_022849205.1	chloride_channel_protein_CLC-e,_transcript_variant_X3	Olive
LOC111405983	-0.56444	-1.47881	0.00156321	0.00895914	XP_022890902.1	coronatine-insensitive_protein_1-like	Olive
LOC111397930	-0.565261	-1.47966	0.000487105	0.00325294	XP_022880662.1	ABC_transporter_G_family_member_5-like	Olive
LOC111372047	-0.567288	-1.48174	0.00240844	0.0128725	XP_022849968.1	folate-biopterin_transporter_3	Olive
LOC111379535	-0.572218	-1.48681	1.38651e-05	0.000136854	XP_022858694.1	cyclic_nucleotide-gated_ion_channel_1-like	Olive
LOC111367434	-0.57286	-1.48747	0.0106605	0.0444818	XP_022844088.1	sodium/hydrogen_exchanger_2-like,_transcript_variant_X4	Olive
LOC111387970	-0.587115	-1.50224	0.0114771	0.0471641		S-adenosylmethionine_mitochondrial_carrier_protein-like	Olive
LOC111405701	-0.604126	-1.52006	0.00712661	0.0320764	XP_022890469.1	two-pore_potassium_channel_5-like,_transcript_variant_X3	Olive
LOC111403266	-0.60718	-1.52328	0.0097498	0.0412723	XP_022887471.1	phospholipid-transporting_ATPase_9,_transcript_variant_X6	Olive
LOC111410476	-0.614613	-1.53115	0.000359016	0.0024895	XP_022896599.1	protein_PNS1-like	Olive
LOC111408636	-0.616733	-1.5334	0.00026133	0.00187875		vacuolar_cation/proton_exchanger_3-like	Olive
LOC111368645	-0.630045	-1.54761	2.25613e-07	3.05459e-06	XP_022845779.1	aquaporin_PIP1-4	Olive
LOC111397144	-0.634088	-1.55196	1.36942e-05	0.000135336	XP_022879674.1	ABC_transporter_B_family_member_28	Olive
LOC111380198	-0.656083	-1.5758	0.000275146	0.0019684	XP_022859457.1	electron_transfer_flavoprotein-ubiquinone_oxidoreductase,_mitochondrial,_transcript_variant_X2	Olive
LOC111408664	-0.659708	-1.57976	5.73229e-06	6.09949e-05	XP_022894166.1	WAT1-related_protein_At3g28050-like	Olive
LOC111365895	-0.660547	-1.58068	0.00259255	0.0137199	XP_022842210.1	calcium-dependent_protein_kinase_32-like,_transcript_variant_X2	Olive
LOC111390613	-0.669253	-1.59025	4.3767e-05	0.000387774	XP_022871445.1	cyclic_nucleotide-gated_ion_channel_1-like	Olive
LOC111410200	-0.674739	-1.59631	3.26965e-07	4.31391e-06	XP_022896208.1	oligopeptide_transporter_4	Olive
LOC111395829	-0.674987	-1.59658	0.00295577	0.0153096	XP_022877777.1	zinc_transporter_11-like	Olive
LOC111405143	-0.678772	-1.60078	0.0119923	0.0488744	XP_022889671.1	mitochondrial_arginine_transporter_BAC2-like	Olive
LOC111384217	-0.681729	-1.60406	3.81079e-06	4.20336e-05	XP_022864246.1	phospholipid-transporting_ATPase_1-like	Olive
LOC111371318	-0.681817	-1.60416	0.00115526	0.00688752	XP_022849000.1	calcium-dependent_protein_kinase_16-like	Olive
LOC111397011	-0.68225	-1.60464	8.70573e-07	1.07404e-05	XP_022879439.1	amino_acid_transporter_AVT6A-like,_transcript_variant_X3	Olive
LOC111376901	-0.685729	-1.60851	0.0023402	0.0125842	XP_022855678.1	nucleobase-ascorbate_transporter_6-like,_transcript_variant_X5	Olive
LOC111403510	-0.691351	-1.6148	0.000617631	0.00400531	XP_022887818.1	protein_SUPPRESSOR_OF_K(+)_TRANSPORT_GROWTH_DEFECT_1-like,_transcript_variant_X3	Olive
LOC111384104	-0.6984	-1.6227	0.00767924	0.0340399	XP_022864109.1	calcium_and_calcium/calmodulin-dependent_serine/threonine-protein_kinase-like	Olive
LOC111408002	-0.69926	-1.62367	0.00985256	0.0416218	XP_022893508.1	non-specific_lipid-transfer_protein_1-like	Olive
LOC111386538	-0.701872	-1.62661	0.000503913	0.00334989	XP_022866764.1	mitochondrial_uncoupling_protein_5-like	Olive
LOC111399635	-0.704714	-1.62982	4.50663e-05	0.000397813	XP_022882870.1	amino_acid_transporter_AVT6C-like	Olive
LOC111410221	-0.7137	-1.64001	8.87183e-07	1.09212e-05	XP_022896270.1	potassium_transporter_11-like,_transcript_variant_X4	Olive
LOC111408162	-0.714632	-1.64106	0.00150578	0.00867433	XP_022893733.1	aquaporin_NIP1-1-like	Olive
LOC111396132	-0.718282	-1.64522	0.00456102	0.022144	XP_022878211.1	potassium_transporter_6-like,_transcript_variant_X2	Olive
LOC111373247	-0.723257	-1.65091	0.00601226	0.0278242	XP_022851522.1	purine_permease_11	Olive
LOC111396126	-0.725515	-1.65349	0.00564713	0.0264253	XP_022878207.1	ABC_transporter_C_family_member_15,_transcript_variant_X3	Olive
LOC111397573	-0.726152	-1.65422	4.94499e-05	0.000431737	XP_022880336.1	adenine_nucleotide_transporter_BT1,_chloroplastic/mitochondrial-like	Olive
LOC111368765	-0.729536	-1.65811	6.34526e-05	0.000537931	XP_022845961.1	glycerol-3-phosphate_transporter_4	Olive
LOC111392498	-0.730002	-1.65864	0.000398394	0.00273325	XP_022873621.1	protein_NUCLEAR_FUSION_DEFECTIVE_4-like	Olive
LOC111402911	-0.732276	-1.66126	0.000529016	0.00349604	XP_022887000.1	metal-nicotianamine_transporter_YSL3-like	Olive
LOC111409241	-0.744173	-1.67501	2.28747e-07	3.09328e-06	XP_022895021.1	mechanosensitive_ion_channel_protein_3,_chloroplastic-like,_transcript_variant_X3	Olive
LOC111375231	-0.74596	-1.67709	0.0036785	0.0184479	XP_022853801.1	GDP-mannose_transporter_GONST2-like,_transcript_variant_X3	Olive
LOC111378382	-0.748457	-1.68	0.00648246	0.0296413	XP_022857344.1	ABC_transporter/pleiotropic_drug_resistance_protein_1-like,_transcript_variant_X2	Olive
LOC111409211	-0.74887	-1.68048	1.06066e-05	0.000106991	XP_022894981.1	glucose-6-phosphate/phosphate_translocator_2,_chloroplastic-like	Olive
LOC111371472	-0.748933	-1.68055	6.45194e-05	0.000545877	XP_022849254.1	sodium/hydrogen_exchanger_1-like,_transcript_variant_X4	Olive
LOC111367400	-0.756949	-1.68991	0.000620601	0.0040176	XP_022844024.1	CASP-like_protein_1E2	Olive
LOC111368528	-0.759722	-1.69316	0.00454448	0.0220796	XP_022845577.1	cation/H(+)_antiporter_15-like	Olive
LOC111380985	-0.759792	-1.69325	5.5958e-09	9.57236e-08	XP_022860438.1	ABC_transporter/pleiotropic_drug_resistance_protein_2-like,_transcript_variant_X2	Olive
LOC111375112	-0.760825	-1.69446	0.010003	0.0421354	XP_022853669.1	polyamine_transporter_At1g31830	Olive
LOC111367223	-0.761313	-1.69503	4.06188e-05	0.000362251	XP_022843747.1	metal_transporter_Nramp3-like	Olive
LOC111399412	-0.762227	-1.69611	0.00258031	0.0136702	XP_022882479.1	ABC_transporter_B_family_member_8,_transcript_variant_X2	Olive
LOC111384484	-0.767161	-1.70192	6.90245e-06	7.23166e-05	XP_022864528.1	calcium-binding_protein_CML36	Olive
LOC111411776	-0.772458	-1.70818	5.97152e-06	6.3253e-05	XP_022898143.1	protein_NRT1/_PTR_FAMILY_4.5-like	Olive
LOC111365415	-0.773569	-1.70949	4.88362e-06	5.27936e-05	XP_022841708.1	protein_NUCLEAR_FUSION_DEFECTIVE_4-like	Olive
LOC111387787	-0.777608	-1.71429	7.27305e-06	7.59627e-05	XP_022868140.1	peroxisomal_adenine_nucleotide_carrier_1-like	Olive
LOC111390152	-0.784157	-1.72209	1.93445e-06	2.23796e-05	XP_022870923.1	solute_carrier_family_40_member_3,_chloroplastic	Olive
LOC111398336	-0.787618	-1.72622	0.000790139	0.00496324	XP_022881021.1	CSC1-like_protein_At1g69450	Olive
LOC111407477	-0.792265	-1.73179	0.000225631	0.00165068	XP_022892742.1	mitochondrial_carrier_protein_CoAc1-like	Olive
LOC111405352	-0.795129	-1.73523	3.51466e-05	0.000318088	XP_022889948.1	metal-nicotianamine_transporter_YSL8,_transcript_variant_X2	Olive
LOC111407179	-0.795886	-1.73614	6.588e-10	1.30024e-08	XP_022892279.1	oligopeptide_transporter_3	Olive
LOC111373236	-0.805679	-1.74797	5.2062e-07	6.65234e-06	XP_022851511.1	ABC_transporter_C_family_member_15,_transcript_variant_X2	Olive
LOC111405391	-0.809656	-1.75279	3.73512e-07	4.88777e-06	XP_022890015.1	sulfate_transporter_4.1,_chloroplastic-like,_transcript_variant_X2	Olive
LOC111391939	-0.813348	-1.75728	0.00776721	0.0343438	XP_022872993.1	inorganic_phosphate_transporter_1-4	Olive
LOC111406352	-0.815997	-1.76051	0.000400748	0.00274716	XP_022891532.1	nucleobase-ascorbate_transporter_6-like	Olive
LOC111380921	-0.819403	-1.76468	0.000408491	0.00278961	XP_022860357.1	vacuolar_cation/proton_exchanger_2-like	Olive
LOC111381810	-0.841024	-1.79132	0.000146942	0.00112904	XP_022861411.1	protein_NRT1/_PTR_FAMILY_4.3-like	Olive
LOC111383859	-0.845663	-1.79709	7.63756e-05	0.000635684	XP_022863807.1	nucleotide-sugar_uncharacterized_transporter_3,_transcript_variant_X2	Olive
LOC111404238	-0.850081	-1.8026	0.00205885	0.0112879	XP_022888798.1	UNC93-like_protein_1	Olive
LOC111370430	-0.859122	-1.81393	1.89912e-07	2.59842e-06	XP_022847893.1	potassium_transporter_11-like,_transcript_variant_X2	Olive
LOC111399650	-0.866606	-1.82337	3.39367e-05	0.000308217	XP_022882853.1	calcium-transporting_ATPase_11,_plasma_membrane-type,_transcript_variant_X2	Olive
LOC111368644	-0.875567	-1.83473	5.03997e-12	1.27635e-10	XP_022845778.1	aquaporin_PIP1-4	Olive
LOC111365997	-0.875643	-1.83483	0.00214003	0.0116572	XP_022842371.1	inositol_transporter_4-like,_transcript_variant_X2	Olive
LOC111398951	-0.88466	-1.84633	3.00437e-07	3.98895e-06	XP_022881896.1	phospholipid-transporting_ATPase_9	Olive
LOC111365316	-0.902079	-1.86876	0.00538754	0.0254085	XP_022841531.1	ammonium_transporter_3_member_2-like	Olive
LOC111401421	-0.902663	-1.86951	1.51958e-07	2.11003e-06	XP_022884912.1	calcium-binding_allergen_Ole_e_8	Olive
LOC111401791	-0.905277	-1.8729	0.000128651	0.00100294	XP_022885464.1	protein_NUCLEAR_FUSION_DEFECTIVE_4-like	Olive
LOC111401214	-0.905533	-1.87324	7.95585e-07	9.87683e-06	XP_022884614.1	metal-nicotianamine_transporter_YSL7	Olive
LOC111373821	-0.90858	-1.8772	0.00529335	0.0250486	XP_022852171.1	G3BP-like_protein	Olive
LOC111401726	-0.908849	-1.87755	0.000496606	0.00330785	XP_022885364.1	anion_transporter_6,_chloroplastic,_transcript_variant_X3	Olive
LOC111404239	-0.912312	-1.88206	6.07734e-05	0.000518881	XP_022888800.1	UNC93-like_protein_1,_transcript_variant_X2	Olive
LOC111396330	-0.915218	-1.88585	0.000131827	0.00102555	XP_022878506.1	sulfate_transporter_3.3	Olive
LOC111381296	-0.91827	-1.88985	1.18243e-10	2.53288e-09	XP_022860836.1	calcium-binding_protein_CAST-like	Olive
LOC111384676	-0.926358	-1.90047	0.000144886	0.00111477	XP_022864758.1	protein_NRT1/_PTR_FAMILY_4.4-like	Olive
LOC111409536	-0.927907	-1.90251	0.00028975	0.00206322	XP_022895345.1	plasma_membrane_ATPase_1-like	Olive
LOC111368643	-0.932465	-1.90853	9.45625e-15	3.10266e-13	XP_022845777.1	aquaporin_PIP1-4	Olive
LOC111386823	-0.937902	-1.91574	0.000149145	0.0011444	XP_022867068.1	sugar_carrier_protein_A-like,_transcript_variant_X2	Olive
LOC111410523	-0.973107	-1.96306	3.43745e-08	5.24762e-07	XP_022896677.1	pto-interacting_protein_1-like,_transcript_variant_X3	Olive
LOC111385702	-0.976357	-1.96749	7.81778e-10	1.52329e-08	XP_022865891.1	sugar_transport_protein_13-like	Olive
LOC111392305	-0.976955	-1.96831	9.35258e-08	1.34475e-06	XP_022873387.1	amino_acid_permease_7,_transcript_variant_X2	Olive
LOC111373636	-0.984281	-1.97833	1.13365e-05	0.00011391	XP_022851963.1	silicon_efflux_transporter_LSI2-like,_transcript_variant_X3	Olive
LOC111410006	-0.992657	-1.98985	2.47545e-06	2.82497e-05	XP_022895929.1	sugar_transport_protein_14	Olive
LOC111382184	-0.997557	-1.99662	2.87789e-12	7.50282e-11	XP_022861855.1	protein_NRT1/_PTR_FAMILY_6.3-like	Olive
LOC111369824	-0.998362	-1.99773	1.34414e-10	2.8665e-09	XP_022847260.1	protein_TRANSPORT_INHIBITOR_RESPONSE_1-like	Olive
LOC111373530	-1.00124	-2.00172	1.23495e-06	1.48172e-05	XP_022851837.1	inorganic_phosphate_transporter_1-3	Olive
LOC111397090	-1.00804	-2.01118	3.32801e-05	0.000302908	XP_022879590.1	plasma_membrane_ATPase_1-like,_transcript_variant_X2	Olive
LOC111408460	-1.00993	-2.01382	8.55493e-10	1.65446e-08	XP_022893983.1	metal-nicotianamine_transporter_YSL1-like	Olive
LOC111412471	-1.01126	-2.01567	0.000691354	0.00441613	XP_022899174.1	ABC_transporter_B_family_member_4-like,_transcript_variant_X3	Olive
LOC111391402	-1.0142	-2.01978	7.05368e-05	0.000592019	XP_022872384.1	protein_NRT1/_PTR_FAMILY_5.1-like	Olive
LOC111366092	-1.0213	-2.02975	3.16392e-07	4.18427e-06	XP_022842514.1	cation/calcium_exchanger_4-like	Olive
LOC111398111	-1.02608	-2.03649	0.0044139	0.0215479	XP_022880835.1	calcium-transporting_ATPase_12,_plasma_membrane-type-like	Olive
LOC111371618	-1.02839	-2.03975	5.0222e-09	8.65275e-08		LOW_QUALITY_PROTEIN:_ABC_transporter_C_family_member_5	Olive
LOC111388375	-1.02905	-2.04068	0.00214922	0.0116977	XP_022868825.1	protein_NUCLEAR_FUSION_DEFECTIVE_4-like,_transcript_variant_X2	Olive
LOC111386501	-1.03333	-2.04674	9.85027e-10	1.88868e-08	XP_022866736.1	amino_acid_permease_6-like	Olive
LOC111399540	-1.03503	-2.04916	1.10057e-07	1.56505e-06	XP_022882682.1	calcium-dependent_protein_kinase_32-like,_transcript_variant_X2	Olive
LOC111407239	-1.03857	-2.05419	1.44335e-07	2.01082e-06	XP_022892371.1	purine_permease_21-like	Olive
LOC111378274	-1.0441	-2.06208	1.9997e-05	0.00019057	XP_022857239.1	copper_transport_protein_ATX1-like	Olive
LOC111372630	-1.05321	-2.07515	7.12388e-09	1.20032e-07	XP_022850782.1	ABC_transporter_B_family_member_4-like,_transcript_variant_X5	Olive
LOC111408733	-1.05934	-2.08398	0.000139994	0.00108233	XP_022894260.1	bidirectional_sugar_transporter_SWEET1-like	Olive
LOC111387808	-1.06154	-2.08716	1.59605e-05	0.000155449	XP_022868165.1	lysine_histidine_transporter_1-like	Olive
LOC111365336	-1.06704	-2.09512	0.00247043	0.0131669	XP_022841566.1	calcium-dependent_protein_kinase_SK5-like	Olive
LOC111395484	-1.07044	-2.10008	8.36608e-06	8.62801e-05	XP_022877262.1	calcium-binding_protein_CML21	Olive
LOC111389252	-1.08442	-2.12053	6.38593e-09	1.08249e-07	XP_022869919.1	bidirectional_sugar_transporter_SWEET2-like,_transcript_variant_X3	Olive
LOC111393633	-1.09357	-2.13402	6.08944e-14	1.87197e-12	XP_022875036.1	ammonium_transporter_1_member_1-like	Olive
LOC111375854	-1.10926	-2.15735	2.02232e-07	2.75916e-06	XP_022854531.1	CSC1-like_protein_At4g02900,_transcript_variant_X2	Olive
LOC111398585	-1.11674	-2.16856	0.000589645	0.00384682	XP_022881322.1	mechanosensitive_ion_channel_protein_10-like	Olive
LOC111378025	-1.12165	-2.17596	1.26399e-18	5.59331e-17	XP_022856958.1	aquaporin_PIP2-1-like	Olive
LOC111372256	-1.12426	-2.1799	4.39186e-07	5.66997e-06	XP_022850269.1	protein_NRT1/_PTR_FAMILY_5.10-like,_transcript_variant_X2	Olive
LOC111372930	-1.13091	-2.18996	0.000771428	0.0048575	XP_022851125.1	purine_permease_3-like	Olive
LOC111412117	-1.13393	-2.19456	0.000373613	0.00257796	XP_022898660.1	sodium/calcium_exchanger_NCL2-like	Olive
LOC111367244	-1.13909	-2.20242	1.00035e-12	2.73742e-11	XP_022843776.1	calcium-transporting_ATPase_2,_plasma_membrane-type-like	Olive
LOC111401187	-1.15891	-2.23288	5.28827e-08	7.87643e-07	XP_022884575.1	mitochondrial_uncoupling_protein_5-like,_transcript_variant_X3	Olive
LOC111396031	-1.16517	-2.2426	3.1236e-07	4.13622e-06	XP_022878052.1	equilibrative_nucleotide_transporter_3-like,_transcript_variant_X5	Olive
LOC111376140	-1.17649	-2.26025	0.000165576	0.0012536	XP_022854850.1	amino_acid_transporter_AVT1J-like	Olive
LOC111389664	-1.18456	-2.27294	2.9695e-09	5.31209e-08	XP_022870371.1	ABC_transporter/protein_STAR1-like	Olive
LOC111377907	-1.21179	-2.31624	4.02716e-11	9.15118e-10	XP_022856828.1	hexose_carrier_protein_HEX6-like,_transcript_variant_X5	Olive
LOC111372219	-1.22041	-2.33014	0.0005058	0.00336044	XP_022850212.1	vacuolar_iron_transporter_homolog_2-like	Olive
LOC111407241	-1.23344	-2.35128	0.00137955	0.00803152	XP_022892373.1	purine_permease_10	Olive
LOC111385367	-1.24254	-2.36615	1.3034e-05	0.000129344	XP_022865518.1	ATPase_N2B	Olive
LOC111408751	-1.24477	-2.3698	1.49034e-05	0.000145999	XP_022894283.1	WAT1-related_protein_At1g43650	Olive
LOC111383840	-1.25312	-2.38356	3.01424e-06	3.37681e-05	XP_022863774.1	non-specific_lipid-transfer_protein_1-like	Olive
LOC111371411	-1.25638	-2.38896	7.66499e-10	1.49699e-08	XP_022849155.1	solute_carrier_family_35_member_F1-like,_transcript_variant_X4	Olive
LOC111405838	-1.26448	-2.4024	0.00135025	0.00787962	XP_022890667.1	protein_YLS3-like	Olive
LOC111379677	-1.26908	-2.41008	8.9065e-09	1.47554e-07	XP_022858869.1	inositol_transporter_4	Olive
LOC111366216	-1.27573	-2.42122	0.000649208	0.00418106	XP_022842696.1	amino_acid_transporter_AVT1C,_transcript_variant_X3	Olive
LOC111389642	-1.27702	-2.42338	0.000643897	0.00415084	XP_022870353.1	amino_acid_permease_3-like,_transcript_variant_X4	Olive
LOC111371374	-1.27715	-2.4236	3.21299e-09	5.72331e-08	XP_022849083.1	aquaporin_TIP1-2	Olive
LOC111407274	-1.27756	-2.42429	2.16807e-06	2.49024e-05	XP_022892425.1	potassium_channel_KAT3-like,_transcript_variant_X2	Olive
LOC111411912	-1.2811	-2.43024	0.000938469	0.00575523	XP_022898347.1	GDP-mannose_transporter_GONST1-like,_transcript_variant_X3	Olive
LOC111368012	-1.28723	-2.44059	7.44446e-05	0.000621869	XP_022844943.1	rop_guanine_nucleotide_exchange_factor_12-like,_transcript_variant_X4	Olive
LOC111404397	-1.29072	-2.4465	3.4847e-07	4.58505e-06	XP_022888978.1	protein_NRT1/_PTR_FAMILY_3.1-like	Olive
LOC111408987	-1.30312	-2.46761	1.57418e-10	3.33173e-09	XP_022894635.1	non-specific_lipid-transfer_protein_2-like	Olive
LOC111367539	-1.32254	-2.50106	8.68515e-25	6.18835e-23	XP_022844245.1	ABC_transporter_G_family_member_11-like	Olive
LOC111377111	-1.32481	-2.505	8.75392e-12	2.16155e-10	XP_022855934.1	glycerol-3-phosphate_transporter_1,_transcript_variant_X3	Olive
LOC111380819	-1.32966	-2.51343	2.11849e-05	0.000200696	XP_022860242.1	WAT1-related_protein_At4g08300-like	Olive
LOC111408029	-1.33177	-2.5171	2.90553e-07	3.86841e-06	XP_022893544.1	ammonium_transporter_2	Olive
LOC111372254	-1.33504	-2.52282	2.74302e-11	6.38853e-10	XP_022850267.1	protein_NRT1/_PTR_FAMILY_5.10-like,_transcript_variant_X2	Olive
LOC111411952	-1.34615	-2.54233	6.65077e-07	8.36157e-06	XP_022898415.1	calcium-binding_protein_KIC-like	Olive
LOC111372216	-1.34771	-2.54508	2.94063e-06	3.30315e-05	XP_022850209.1	glycolipid_transfer_protein_3-like	Olive
LOC111394384	-1.35336	-2.55507	7.44164e-18	3.10124e-16	XP_022875944.1	sucrose_transport_protein-like	Olive
LOC111368487	-1.35429	-2.55671	1.87241e-09	3.4448e-08	XP_022845512.1	copper-transporting_ATPase_HMA5,_transcript_variant_X3	Olive
LOC111375866	-1.38414	-2.61016	0.00402427	0.0199205	XP_022854547.1	sugar_transporter_ERD6-like_7	Olive
LOC111403268	-1.39665	-2.6329	0.00119828	0.00710749	XP_022887472.1	phospholipid-transporting_ATPase_9	Olive
LOC111369844	-1.40613	-2.65025	2.19988e-16	8.23876e-15	XP_022847301.1	ABC_transporter_C_family_member_14-like,_transcript_variant_X2	Olive
LOC111366848	-1.40614	-2.65026	7.63323e-07	9.52554e-06	XP_022843307.1	metal-nicotianamine_transporter_YSL3-like	Olive
LOC111389839	-1.41037	-2.65806	2.02249e-08	3.20237e-07	XP_022870582.1	calcium-dependent_protein_kinase_18-like	Olive
LOC111366051	-1.42103	-2.67776	1.59255e-19	7.53293e-18	XP_022842465.1	sodium/hydrogen_exchanger_1-like,_transcript_variant_X3	Olive
LOC111388722	-1.44945	-2.73105	1.00482e-11	2.46486e-10	XP_022869277.1	protein_NRT1/_PTR_FAMILY_2.11-like	Olive
LOC111372470	-1.45402	-2.73971	0.00210182	0.0114881	XP_022850595.1	sucrose_transport_protein-like	Olive
LOC111399587	-1.46083	-2.75268	4.88358e-10	9.7995e-09	XP_022882754.1	aquaporin_SIP2-1,_transcript_variant_X2	Olive
LOC111395595	-1.49555	-2.81971	4.87055e-05	0.000425679	XP_022877416.1	ABC_transporter_G_family_member_10-like	Olive
LOC111397933	-1.50246	-2.83326	3.17305e-06	3.5441e-05	XP_022880664.1	calcium-binding_protein_CML45	Olive
LOC111405469	-1.50721	-2.84261	4.34905e-09	7.57446e-08	XP_022890134.1	coronatine-insensitive_protein_1-like	Olive
LOC111375898	-1.51145	-2.85096	2.45829e-11	5.7453e-10	XP_022854581.1	chloride_channel_protein_CLC-c-like	Olive
LOC111386156	-1.53338	-2.89463	4.63735e-26	3.65243e-24	XP_022866376.1	protein_NRT1/_PTR_FAMILY_2.11-like	Olive
LOC111399533	-1.56702	-2.96291	4.35408e-18	1.85357e-16	XP_022882669.1	polyol_transporter_1	Olive
LOC111407157	-1.56949	-2.968	2.1996e-24	1.51899e-22	XP_022892250.1	protein_TRANSPORT_INHIBITOR_RESPONSE_1-like,_transcript_variant_X2	Olive
LOC111400245	-1.58036	-2.99045	0.00122806	0.00725725	XP_022883440.1	protein_CNGC15b-like	Olive
LOC111374011	-1.58615	-3.00248	8.68883e-11	1.88647e-09	XP_022852386.1	WAT1-related_protein_At5g07050-like	Olive
LOC111398535	-1.62373	-3.0817	3.75478e-14	1.17906e-12	XP_022881255.1	UDP-galactose/UDP-glucose_transporter_2-like	Olive
LOC111379536	-1.6267	-3.08805	8.34854e-09	1.38857e-07	XP_022858696.1	cyclic_nucleotide-gated_ion_channel_1-like,_transcript_variant_X2	Olive
LOC111376002	-1.64088	-3.11857	9.79036e-10	1.87826e-08	XP_022854699.1	nicotinamide_adenine_dinucleotide_transporter_1,_chloroplastic-like	Olive
LOC111394346	-1.65056	-3.13955	3.99296e-16	1.46923e-14	XP_022875880.1	UDP-galactose_transporter_1-like	Olive
LOC111399093	-1.65218	-3.14309	1.23081e-30	1.28952e-28	XP_022882098.1	SPX_domain-containing_membrane_protein_At4g22990-like,_transcript_variant_X6	Olive
LOC111395677	-1.65372	-3.14644	1.60821e-07	2.22118e-06	XP_022877552.1	organic_cation/carnitine_transporter_4-like	Olive
LOC111376954	-1.65754	-3.15479	2.76803e-14	8.78223e-13	XP_022855736.1	protein_NRT1/_PTR_FAMILY_5.2-like	Olive
LOC111392397	-1.66038	-3.16099	2.89439e-13	8.34116e-12	XP_022873507.1	cation/H(+)_antiporter_18-like,_transcript_variant_X4	Olive
LOC111396943	-1.6607	-3.16171	4.91428e-23	3.05494e-21	XP_022879330.1	ABC_transporter_B_family_member_15-like	Olive
LOC111395727	-1.70173	-3.25291	2.07188e-16	7.79412e-15	XP_022877638.1	protein_NRT1/_PTR_FAMILY_4.6-like,_transcript_variant_X2	Olive
LOC111388723	-1.72062	-3.29578	2.1915e-36	3.20445e-34	XP_022869278.1	protein_NRT1/_PTR_FAMILY_2.11-like	Olive
LOC111388976	-1.74569	-3.35356	0.000600562	0.00391045	XP_022869579.1	mechanosensitive_ion_channel_protein_10-like,_transcript_variant_X2	Olive
LOC111372208	-1.74787	-3.35861	5.86822e-20	2.87688e-18	XP_022850202.1	protein_NUCLEAR_FUSION_DEFECTIVE_4-like	Olive
LOC111399034	-1.75177	-3.36771	4.76212e-13	1.35214e-11	XP_022882002.1	lysine_histidine_transporter-like_6	Olive
LOC111405060	-1.75968	-3.38623	1.61057e-15	5.65988e-14	XP_022889519.1	polyol_transporter_5-like,_transcript_variant_X3	Olive
LOC111381530	-1.76842	-3.4068	5.23861e-05	0.000454306	XP_022861087.1	calcium-binding_protein_CML30	Olive
LOC111372870	-1.78895	-3.45564	1.08751e-21	6.0957e-20	XP_022851054.1	sugar_transporter_ERD6-like_7,_transcript_variant_X3	Olive
LOC111393624	-1.80211	-3.48731	0.00038207	0.00263091	XP_022875017.1	magnesium_transporter_NIPA1,_transcript_variant_X7	Olive
LOC111409764	-1.82367	-3.53981	1.91756e-07	2.62259e-06	XP_022895555.1	sulfate_transporter_1.3-like,_transcript_variant_X4	Olive
LOC111372207	-1.83001	-3.5554	4.22409e-19	1.9328e-17	XP_022850201.1	protein_NUCLEAR_FUSION_DEFECTIVE_4-like	Olive
LOC111402136	-1.8336	-3.56424	6.97752e-07	8.75928e-06	XP_022885993.1	calcium-transporting_ATPase_2,_plasma_membrane-type-like	Olive
LOC111390556	-1.90642	-3.74879	6.67652e-23	4.08251e-21	XP_022871378.1	inorganic_phosphate_transporter_1-4-like	Olive
LOC111407250	-1.91054	-3.7595	9.81985e-05	0.00079178	XP_022892398.1	sodium/calcium_exchanger_NCL2-like,_transcript_variant_X3	Olive
LOC111393801	-1.91735	-3.77729	3.93319e-07	5.12106e-06	XP_022875279.1	metal_tolerance_protein_4-like	Olive
LOC111369750	-1.91812	-3.77931	1.72469e-28	1.60863e-26	XP_022847157.1	protein_NRT1/_PTR_FAMILY_5.2-like	Olive
LOC111410404	-1.92797	-3.80518	5.20226e-06	5.58611e-05	XP_022896486.1	calcium-binding_protein_KIC-like	Olive
LOC111366941	-1.9673	-3.91035	0.000113594	0.00090207	XP_022843389.1	calcium-binding_protein_CML30	Olive
LOC111389641	-1.99474	-3.98544	2.85547e-37	4.42545e-35	XP_022870348.1	amino_acid_permease_3-like	Olive
LOC111404870	-1.99801	-3.9945	3.25124e-05	0.000296562	XP_022889371.1	protein_NRT1/_PTR_FAMILY_3.1-like	Olive
LOC111400829	-2.00272	-4.00756	1.06778e-09	2.04153e-08	XP_022884020.1	magnesium_transporter_NIPA4	Olive
LOC111382308	-2.01407	-4.0392	9.36872e-09	1.54678e-07	XP_022862004.1	lysine_histidine_transporter-like_8,_transcript_variant_X2	Olive
LOC111400554	-2.03182	-4.08921	1.35377e-12	3.6628e-11	XP_022883728.1	metal_transporter_Nramp3-like	Olive
LOC111401099	-2.0623	-4.17651	2.28938e-10	4.72647e-09	XP_022884425.1	amino_acid_permease_3-like	Olive
LOC111379705	-2.07606	-4.21654	8.46835e-11	1.84575e-09	XP_022858908.1	potassium_transporter_10-like,_transcript_variant_X4	Olive
LOC111410658	-2.09953	-4.28569	7.12349e-07	8.93252e-06	XP_022896877.1	nucleobase-ascorbate_transporter_4	Olive
LOC111378351	-2.10262	-4.29489	7.3224e-13	2.03017e-11	XP_022857301.1	mitochondrial_phosphate_carrier_protein_3,_mitochondrial-like	Olive
LOC111378132	-2.12374	-4.35824	1.80455e-08	2.87352e-07	XP_022857074.1	protein_NRT1/_PTR_FAMILY_5.6-like	Olive
LOC111411909	-2.14338	-4.41795	3.94438e-15	1.33858e-13	XP_022898341.1	calcium-dependent_protein_kinase_17-like,_transcript_variant_X5	Olive
LOC111374812	-2.15705	-4.46002	1.38372e-10	2.94905e-09	XP_022853318.1	protein_NRT1/_PTR_FAMILY_3.1,_transcript_variant_X2	Olive
LOC111412340	-2.1606	-4.471	1.01459e-08	1.66609e-07	XP_022898994.1	cationic_amino_acid_transporter_1-like	Olive
LOC111389731	-2.17305	-4.50976	1.21536e-29	1.22011e-27	XP_022870449.1	protein_NRT1/_PTR_FAMILY_6.4,_transcript_variant_X2	Olive
LOC111367921	-2.17398	-4.51267	3.86522e-12	9.90031e-11	XP_022844801.1	calcium_uniporter_protein_2,_mitochondrial-like	Olive
LOC111365626	-2.18909	-4.56016	3.92229e-33	4.74499e-31	XP_022841941.1	protein_NRT1/_PTR_FAMILY_5.5-like,_transcript_variant_X2	Olive
LOC111393836	-2.21107	-4.63019	3.28867e-37	5.02734e-35	XP_022875322.1	sulfate_transporter_1.3,_transcript_variant_X2	Olive
LOC111405418	-2.26478	-4.80582	2.72023e-38	4.44097e-36	XP_022890050.1	metal-nicotianamine_transporter_YSL5	Olive
LOC111398957	-2.26636	-4.81107	3.60759e-14	1.13496e-12	XP_022881905.1	phosphate_transporter_PHO1_homolog_1-like,_transcript_variant_X2	Olive
LOC111404607	-2.29375	-4.90329	5.02938e-05	0.000438319	XP_022889160.1	cadmium/zinc-transporting_ATPase_HMA3-like	Olive
LOC111413001	-2.30631	-4.94615	1.21965e-21	6.77982e-20	XP_022899648.1	WAT1-related_protein_At5g07050-like	Olive
LOC111406288	-2.32701	-5.01765	0.00744214	0.0332298	XP_022891406.1	lysine_histidine_transporter-like_2,_transcript_variant_X3	Olive
LOC111372815	-2.35279	-5.10813	4.19319e-23	2.61635e-21	XP_022850991.1	aquaporin_PIP2-2-like	Olive
LOC111406124	-2.42667	-5.37651	4.16105e-71	2.79881e-68	XP_022891109.1	ABC_transporter_C_family_member_10-like,_transcript_variant_X4	Olive
LOC111384886	-2.43313	-5.40065	1.2302e-34	1.60983e-32	XP_022864995.1	amino_acid_transporter_AVT1I-like	Olive
LOC111385156	-2.459	-5.49836	1.08644e-77	9.13454e-75	XP_022865299.1	protein_NRT1/_PTR_FAMILY_3.1-like	Olive
LOC111370934	-2.46581	-5.52438	1.60963e-17	6.57757e-16	XP_022848609.1	potassium_channel_KAT3-like	Olive
LOC111392346	-2.47219	-5.54886	0.000339587	0.00237288	XP_022873447.1	potassium_transporter_8-like,_transcript_variant_X2	Olive
LOC111366880	-2.47539	-5.56119	2.589e-54	8.37219e-52	XP_022843334.1	ABC_transporter_G_family_member_35-like	Olive
LOC111396839	-2.48249	-5.58862	9.5079e-58	3.43828e-55	XP_022879145.1	cationic_amino_acid_transporter_5	Olive
LOC111372270	-2.51453	-5.71411	1.01602e-11	2.48688e-10	XP_022850280.1	amino_acid_permease_3-like	Olive
LOC111391340	-2.52124	-5.74074	3.28205e-08	5.02864e-07	XP_022872307.1	ABC_transporter/pleiotropic_drug_resistance_protein_2-like,_transcript_variant_X2	Olive
LOC111388101	-2.55199	-5.86444	2.32164e-05	0.000218342	XP_022868529.1	ABC_transporter/pleiotropic_drug_resistance_protein_1-like	Olive
LOC111390902	-2.55399	-5.87256	1.65013e-35	2.25591e-33	XP_022871790.1	plasma_membrane_ATPase_4-like,_transcript_variant_X2	Olive
LOC111388102	-2.59109	-6.02554	2.28226e-05	0.000214879	XP_022868530.1	ABC_transporter/pleiotropic_drug_resistance_protein_1-like	Olive
LOC111378674	-2.59173	-6.0282	2.49147e-07	3.34628e-06	XP_022857670.1	inorganic_phosphate_transporter_1-9	Olive
LOC111373233	-2.59459	-6.04019	9.2315e-15	3.03188e-13	XP_022851506.1	protein_NRT1/_PTR_FAMILY_7.3-like	Olive
LOC111382506	-2.60777	-6.0956	1.15339e-16	4.43819e-15	XP_022862277.1	boron_transporter_7,_transcript_variant_X2	Olive
LOC111367293	-2.61555	-6.12858	1.33408e-12	3.61534e-11	XP_022843864.1	sulfate_transporter_3.4	Olive
LOC111406275	-2.6237	-6.16328	2.68867e-43	5.87161e-41	XP_022891378.1	sulfate_transporter_3.4	Olive
LOC111408916	-2.63728	-6.22157	1.51633e-60	5.72984e-58	XP_022894531.1	protein_WALLS_ARE_THIN_1	Olive
LOC111399771	-2.65735	-6.30872	1.35799e-08	2.19781e-07	XP_022883015.1	ABC_transporter_G_family_member_22-like,_transcript_variant_X2	Olive
LOC111388930	-2.66672	-6.34984	2.923e-43	6.34216e-41	XP_022869530.1	WAT1-related_protein_At2g37460-like,_transcript_variant_X3	Olive
LOC111377624	-2.68488	-6.43029	3.28297e-34	4.19808e-32	XP_022856516.1	lysine_histidine_transporter_1-like	Olive
LOC111367850	-2.72461	-6.60984	5.66215e-46	1.38995e-43	XP_022844688.1	amino_acid_permease_3-like,_transcript_variant_X2	Olive
LOC111405419	-2.75564	-6.7535	2.40674e-17	9.73604e-16	XP_022890051.1	metal-nicotianamine_transporter_YSL5	Olive
LOC111395472	-2.76248	-6.78562	1.97554e-12	5.2397e-11	XP_022877244.1	ADP,ATP_carrier_protein_1,_mitochondrial-like	Olive
LOC111371809	-2.77274	-6.83403	1.03046e-33	1.28831e-31	XP_022849752.1	ABC_transporter/pleiotropic_drug_resistance_protein_1-like,_transcript_variant_X2	Olive
LOC111378785	-2.78104	-6.87348	8.08426e-11	1.76891e-09	XP_022857796.1	ABC_transporter_G_family_member_22-like,_transcript_variant_X3	Olive
LOC111396629	-2.78918	-6.91238	4.98816e-13	1.41448e-11	XP_022878820.1	non-specific_lipid-transfer_protein-like_protein_At2g13820	Olive
LOC111373895	-2.8321	-7.12112	3.00445e-39	5.20838e-37	XP_022852256.1	protein_NRT1/_PTR_FAMILY_5.10-like	Olive
LOC111384353	-2.84734	-7.19674	5.19117e-17	2.04192e-15	XP_022864392.1	calcium-dependent_protein_kinase_24-like	Olive
LOC111386685	-2.84887	-7.20437	4.6632e-63	2.14833e-60	XP_022866914.1	polyol_transporter_1	Olive
LOC111405347	-2.84906	-7.20529	1.38349e-38	2.29202e-36	XP_022889943.1	organic_cation/carnitine_transporter_1	Olive
LOC111381934	-2.87214	-7.32148	8.64103e-25	6.18312e-23	XP_022861554.1	protein_NRT1/_PTR_FAMILY_4.3-like	Olive
LOC111385710	-2.88403	-7.38211	6.1953e-21	3.21534e-19	XP_022865897.1	sugar_transport_protein_8-like	Olive
LOC111397647	-2.9052	-7.4912	3.10291e-15	1.06811e-13	XP_022880417.1	sucrose_transport_protein_SUC8-like,_transcript_variant_X2	Olive
LOC111366570	-2.90729	-7.50208	5.59325e-14	1.72892e-12	XP_022843065.1	bidirectional_sugar_transporter_SWEET5	Olive
LOC111394361	-2.91149	-7.52395	8.48017e-33	1.00776e-30	XP_022875900.1	amino_acid_permease_3-like	Olive
LOC111369468	-2.9156	-7.54541	5.26522e-27	4.50571e-25	XP_022846754.1	sugar_transport_protein_13-like	Olive
LOC111370922	-2.92589	-7.59941	2.21823e-20	1.11512e-18	XP_022848595.1	cation/H(+)_antiporter_15-like	Olive
LOC111399299	-2.92769	-7.60892	1.67952e-11	4.00595e-10	XP_022882323.1	sugar_transport_protein_10-like	Olive
LOC111370141	-2.93056	-7.62408	9.01e-11	1.95368e-09	XP_022847607.1	ABC_transporter_C_family_member_3-like	Olive
LOC111390302	-2.93703	-7.65834	6.26067e-35	8.32224e-33	XP_022871086.1	calcium-binding_protein_CML29	Olive
LOC111383284	-2.95863	-7.77387	5.97653e-39	1.01513e-36	XP_022863130.1	tetraspanin-8-like	Olive
LOC111383881	-2.97652	-7.87083	5.82037e-14	1.79418e-12	XP_022863830.1	protein_NRT1/_PTR_FAMILY_4.5-like	Olive
LOC111384357	-2.98152	-7.8982	4.22896e-17	1.6693e-15	XP_022864395.1	amino_acid_transporter_AVT1H	Olive
LOC111378718	-2.99734	-7.98524	2.68105e-81	2.73231e-78	XP_022857721.1	inorganic_phosphate_transporter_1-4-like,_transcript_variant_X2	Olive
LOC111392320	-3.02507	-8.1402	2.75005e-36	4.00376e-34	XP_022873401.1	CASP-like_protein_1	Olive
LOC111388892	-3.03888	-8.21853	1.33986e-36	1.98506e-34	XP_022869485.1	hexose_carrier_protein_HEX6-like	Olive
LOC111392163	-3.10628	-8.61159	3.16398e-28	2.90731e-26	XP_022873197.1	ABC_transporter_B_family_member_13-like,_transcript_variant_X2	Olive
LOC111407228	-3.15458	-8.90478	3.2134e-28	2.94469e-26	XP_022892361.1	ABC_transporter_B_family_member_9-like	Olive
LOC111405980	-3.18016	-9.06409	7.65794e-23	4.66566e-21	XP_022890898.1	ABC_transporter_G_family_member_6-like	Olive
LOC111376356	-3.20691	-9.23371	5.54506e-21	2.90477e-19	XP_022855081.1	high_affinity_nitrate_transporter_2.5-like	Olive
LOC111403121	-3.2714	-9.65585	8.7889e-48	2.34587e-45	XP_022887281.1	protein_NUCLEAR_FUSION_DEFECTIVE_4-like	Olive
LOC111411848	-3.32645	-10.0314	0.000878819	0.00543029	XP_022898250.1	GABA_transporter_1-like	Olive
LOC111412402	-3.43371	-10.8056	7.24209e-29	6.88019e-27	XP_022899092.1	potassium_transporter_5-like	Olive
LOC111389197	-3.48531	-11.1991	6.90596e-46	1.6709e-43	XP_022869852.1	ATPase_8,_plasma_membrane-type-like,_transcript_variant_X2	Olive
LOC111373790	-3.51104	-11.4006	1.39006e-12	3.74894e-11	XP_022852119.1	lysine_histidine_transporter-like_8	Olive
LOC111384108	-3.54681	-11.6868	2.43192e-43	5.34562e-41	XP_022864112.1	protein_NRT1/_PTR_FAMILY_2.11-like	Olive
LOC111380725	-3.63405	-12.4153	3.2249e-31	3.53279e-29	XP_022860126.1	plasma_membrane_ATPase_4-like	Olive
LOC111407930	-3.66637	-12.6966	7.52238e-19	3.36865e-17	XP_022893423.1	equilibrative_nucleotide_transporter_8-like	Olive
LOC111398958	-3.72967	-13.2661	6.48656e-68	3.57622e-65	XP_022881906.1	ABC_transporter_G_family_member_21-like	Olive
LOC111410036	-3.9295	-15.237	2.43143e-38	3.98885e-36	XP_022895961.1	bidirectional_sugar_transporter_SWEET17-like	Olive
LOC111382289	-3.94459	-15.3972	1.59025e-21	8.7246e-20	XP_022861975.1	sugar_transport_protein_8-like	Olive
LOC111366057	-3.97844	-15.7626	3.51146e-22	2.02562e-20	XP_022842472.1	CASP-like_protein_1	Olive
LOC111390157	-4.00246	-16.0273	3.08836e-30	3.19583e-28	XP_022870932.1	protein_NRT1/_PTR_FAMILY_5.6	Olive
LOC111408058	-4.00389	-16.0432	1.21851e-116	3.41497e-113	XP_022893591.1	tonoplast_dicarboxylate_transporter	Olive
LOC111385841	-4.03995	-16.4493	2.50843e-17	1.01274e-15	XP_022866040.1	vacuolar_cation/proton_exchanger_3-like	Olive
LOC111367409	-4.06674	-16.7575	7.61056e-20	3.69337e-18	XP_022844034.1	CASP-like_protein_1	Olive
LOC111371596	-4.21067	-18.5157	1.7039e-22	1.01244e-20	XP_022849431.1	inorganic_phosphate_transporter_1-4-like,_transcript_variant_X2	Olive
LOC111367334	-4.26116	-19.175	7.66699e-24	5.10591e-22	XP_022843919.1	boron_transporter_4-like	Olive
LOC111377905	-4.34981	-20.3903	2.57027e-17	1.03522e-15	XP_022856822.1	hexose_carrier_protein_HEX6-like	Olive
LOC111368637	-4.52993	-23.1017	1.21751e-35	1.69901e-33	XP_022845764.1	amino_acid_transporter_AVT1C-like,_transcript_variant_X5	Olive
LOC111381300	-4.53495	-23.1823	4.98865e-128	2.39676e-124	XP_022860840.1	high_affinity_nitrate_transporter_2.7	Olive
LOC111382291	-4.63534	-24.8528	0.000448288	0.00302678	XP_022861978.1	sugar_transport_protein_8-like	Olive
LOC111412367	-4.66959	-25.45	2.34503e-16	8.74342e-15	XP_022899035.1	non-specific_lipid-transfer_protein-like_protein_At2g13820	Olive
LOC111390680	-4.74023	-26.727	8.80213e-23	5.32418e-21	XP_022871514.1	protein_NUCLEAR_FUSION_DEFECTIVE_4-like	Olive
LOC111375723	-4.9505	-30.9206	1.13851e-15	4.04747e-14	XP_022854358.1	oligopeptide_transporter_7	Olive
LOC111397297	-5.11279	-34.6021	8.40251e-17	3.27445e-15	XP_022879911.1	calcium_uniporter_protein_4,_mitochondrial-like	Olive
LOC111379180	-5.25699	-38.2395	4.54085e-26	3.58482e-24	XP_022858289.1	polyol_transporter_6	Olive
LOC111375915	-5.44196	-43.4705	3.57199e-10	7.24982e-09	XP_022854600.1	bidirectional_sugar_transporter_N3-like,_transcript_variant_X4	Olive
LOC111391732	-5.53502	-46.3669	2.46529e-22	1.44443e-20	XP_022872751.1	cation/H(+)_antiporter_20-like	Olive
LOC111375323	-6.00909	-64.4046	7.97679e-79	7.05967e-76	XP_022853896.1	WAT1-related_protein_At5g07050-like	Olive
LOC111369518	-0.431714	-1.34883	0.00274387	0.0143872	XP_022846832.1	kinesin_light_chain_3,_transcript_variant_X2	Olive
LOC111391234	-2.30855	-4.95384	1.302e-08	2.1133e-07	XP_022872170.1	kinesin-like_protein_KIN-14C,_transcript_variant_X5	Olive
LOC111390359	-1.4448	-2.72225	3.51536e-08	5.35439e-07	XP_022871157.1	protein_KINESIN_LIGHT_CHAIN-RELATED_2-like,_transcript_variant_X6	Olive
LOC111372190	-1.02546	-2.0356	1.00437e-05	0.00010211	XP_022850168.1	SNAP25_homologous_protein_SNAP33-like	Olive
LOC111399786	-1.52323	-2.87433	0.000128415	0.00100179	XP_022883039.1	syntaxin-121-like	Olive
LOC111366043	-1.57026	-2.96959	0.000156336	0.00119115	XP_022842447.1	syntaxin-121-like	Olive
LOC111366281	-0.754066	-1.68654	0.00168705	0.00955814	XP_022842778.1	syntaxin-121-like	Olive
LOC111386980	-3.52473	-11.5093	1.2662e-14	4.11434e-13	XP_022867251.1	syntaxin-124-like	Olive
LOC111410579	-0.885644	-1.84759	1.45702e-06	1.71926e-05	XP_022896760.1	syntaxin-22-like	Olive
LOC111379630	-0.393074	-1.31319	0.0116559	0.0477707	XP_022858815.1	transmembrane_GTPase_FZO-like,_chloroplastic,_transcript_variant_X2	Olive
LOC111407570	-0.678696	-1.60069	0.00678031	0.0307689	XP_022892908.1	tubulin_beta_chain-like	Olive
LOC111367589	-0.450144	-1.36618	0.000569757	0.00373155	XP_022844311.1	tubulin_beta-1_chain-like	Olive
LOC111401274	-0.35275	-1.27699	0.0107184	0.0446513	XP_022884721.1	tubulin_beta-1_chain-like	Olive
LOC111369942	-1.08397	-2.11985	0.00209227	0.0114415	XP_022847441.1	vesicle-associated_membrane_protein_722-like	Olive
LOC111378569	-0.981168	-1.97406	4.07672e-05	0.000363383	XP_022857564.1	vesicle-associated_protein_1-4-like	Olive
LOC111377700	-1.00068	-2.00095	0.00112697	0.0067344	XP_022856597.1	vesicle-associated_protein_2-1,_transcript_variant_X2	Olive
LOC111382124	-0.724731	-1.65259	0.00204875	0.0112456	XP_022861764.1	X-linked_retinitis_pigmentosa_GTPase_regulator-like	Olive
