# Supplementary material for: Characterization of Transcriptome Dynamics during Early Fruit Development in Olive (Olea europaea L.)
Source: Int J Mol Sci. 2023 Jan 4;24(2):961. doi: 10.3390/ijms24020961 (PMC9864153; doi:10.3390/ijms24020961)
Supplement: Supplementary file 1 [file ijms-24-00961-s001.zip › Table S19_def.xlsx]

## Sheet: P14 vs. P0_UP
Supplementary Table S19. Transcription factors (TF) genes repressed or induced in the dividing fruits at 14 (P14) versus the flowers at anthesis stage (P0), and the expanding fruits at 28 (P28) DPA versus the dividing fruits at 14 (P14) during early olive fruit development.
Genes	log2FoldChange	FoldChange	pvalue	Gene_ID	Description
LOC111392268	0.481624	1.39631	0.0235597	XP_022873338.1	ABSCISIC ACID-INSENSITIVE 5-like protein 2=Olea europaea var. sylvestris
LOC111383610	1.09009	2.12888	2.38e-10	XP_022863495.1	ABSCISIC ACID-INSENSITIVE 5-like protein 4=Olea europaea var. sylvestris
LOC111402059	2.17058	4.50205	4.71e-22	XP_022885868.1	agamous-like MADS-box protein AGL81=Olea europaea var. sylvestris
LOC111371974	0.285213	1.21859	0.0144322	XP_022849884.1	agamous-like MADS-box protein AGL81=Olea europaea var. sylvestris
LOC111374630	1.54598	2.92003	6.95e-05	XP_022853103.1	AP2-like ethylene-responsive transcription factor AIL5=Olea europaea var. sylvestris
LOC111390109	6.71782	105.26	5.95e-21	XP_022870872.1	AP2-like ethylene-responsive transcription factor ANT=Olea europaea var. sylvestris
LOC111384308	3.63298	12.4061	2.68e-64	XP_022864341.1	AP2-like ethylene-responsive transcription factor ANT=Olea europaea var. sylvestris
LOC111405188	2.1575	4.46142	4.46e-27	XP_022889728.1	AP2-like ethylene-responsive transcription factor At1g16060=Olea europaea var. sylvestris
LOC111372046	1.39853	2.63633	7.93e-08	XP_022849967.1	AP2-like ethylene-responsive transcription factor At1g16060=Olea europaea var. sylvestris
LOC111368704	1.02131	2.02976	1.74e-08	XP_022845880.1	AP2-like ethylene-responsive transcription factor At2g41710=Olea europaea var. sylvestris
LOC111366637	3.74538	13.4113	1.52e-19	XP_022843119.1	AP2-like ethylene-responsive transcription factor BBM2=Olea europaea var. sylvestris
LOC111401005	0.414911	1.33322	0.00144801	XP_022884297.1	AP2-like ethylene-responsive transcription factor TOE3=Olea europaea var. sylvestris
LOC111409807	1.30299	2.46739	1.11e-26	XP_022895634.1	auxin response factor 1=Olea europaea var. sylvestris
LOC111369910	2.82248	7.0738	3.04e-12	XP_022847394.1	auxin response factor 10-like=Olea europaea var. sylvestris
LOC111372350	0.956606	1.94074	1.67e-15	XP_022850416.1	auxin response factor 17-like=Olea europaea var. sylvestris
LOC111386416	0.786279	1.72462	0.00382393	XP_022866648.1	auxin response factor 17-like=Olea europaea var. sylvestris
LOC111369403	1.1538	2.22499	1.38e-11	XP_022846671.1	auxin response factor 18-like=Olea europaea var. sylvestris
LOC111409930	0.993329	1.99077	8.21e-05	XP_022895821.1	auxin response factor 18-like=Olea europaea var. sylvestris
LOC111366326	1.15474	2.22645	1.56e-16	XP_022842837.1	auxin response factor 19-like=Olea europaea var. sylvestris
LOC111369829	0.803921	1.74584	7.4e-09	XP_022847289.1	auxin response factor 19-like=Olea europaea var. sylvestris
LOC111393500	1.3209	2.49821	1.2e-05	XP_022874817.1	auxin response factor 22-like=Olea europaea var. sylvestris
LOC111401409	0.437997	1.35472	0.000825512	XP_022884900.1	auxin response factor 2B =Olea europaea var. sylvestris
LOC111370596	2.24467	4.73929	8.29e-24	XP_022848157.1	auxin response factor 3-like=Olea europaea var. sylvestris
LOC111393658	0.746396	1.6776	8.89e-11	XP_022875076.1	auxin response factor 4=Olea europaea var. sylvestris
LOC111385592	3.72998	13.2689	2.24e-39	XP_022865769.1	auxin response factor 4-like=Olea europaea var. sylvestris
LOC111380232	1.72055	3.29563	1.74e-37	XP_022859505.1	auxin response factor 5-like=Olea europaea var. sylvestris
LOC111412249	0.279088	1.21343	0.0131707	XP_022898867.1	auxin response factor 6=Olea europaea var. sylvestris
LOC111370501	1.00108	2.0015	2.82e-13	XP_022847985.1	auxin response factor 6-like=Olea europaea var. sylvestris
LOC111380460	0.656374	1.57612	3.8e-08	XP_022859803.1	auxin response factor 8-like=Olea europaea var. sylvestris
LOC111375479	6.83284	113.996	3.86e-171	XP_022854076.1	auxin response factor 9-like=Olea europaea var. sylvestris
LOC111371732	4.1848	18.1865	1.99e-26	XP_022849636.1	auxin response factor 9-like=Olea europaea var. sylvestris
LOC111381921	3.7944	13.8748	2.71e-105	XP_022861541.1	auxin response factor 9-like=Olea europaea var. sylvestris
LOC111388879	3.66566	12.6904	2.46e-77	XP_022869468.1	auxin response factor 9-like=Olea europaea var. sylvestris
LOC111390474	3.50305	11.3377	1.39e-86	XP_022871290.1	auxin response factor 9-like=Olea europaea var. sylvestris
LOC111365471	0.986218	1.98099	3.06e-07	XP_022841789.1	basic transcription factor 3-like=Olea europaea var. sylvestris
LOC111368674	0.624977	1.54219	0.0204175	XP_022845826.1	BES1/BZR1 homolog protein 4-like=Olea europaea var. sylvestris
LOC111394924	3.08157	8.46538	5.59e-15	XP_022876739.1	bZIP transcription factor 11-like=Olea europaea var. sylvestris
LOC111382652	2.21619	4.64665	5.93e-12	XP_022862451.1	bZIP transcription factor 11-like=Olea europaea var. sylvestris
LOC111382654	1.9927	3.97981	1.6e-06	XP_022862453.1	bZIP transcription factor 11-like=Olea europaea var. sylvestris
LOC111391977	1.83053	3.55667	1.5e-27	XP_022873027.1	bZIP transcription factor 44-like=Olea europaea var. sylvestris
LOC111408794	1.20632	2.30749	8.87e-23	XP_022894334.1	bZIP transcription factor 46-like=Olea europaea var. sylvestris
LOC111396365	1.27915	2.42696	0.00145643	XP_022878554.1	bZIP transcription factor 68-like=Olea europaea var. sylvestris
LOC111368142	2.10659	4.30671	2.83e-12	XP_022845140.1	E2F transcription factor-like E2FE=Olea europaea var. sylvestris
LOC111392889	3.06571	8.37278	2.63e-23	XP_022874066.1	ethylene-responsive transcription factor 12-like=Olea europaea var. sylvestris
LOC111372227	2.83282	7.12463	1.27e-17	XP_022850227.1	ethylene-responsive transcription factor ABR1-like=Olea europaea var. sylvestris
LOC111371777	0.813073	1.75695	0.00610302	XP_022849697.1	ethylene-responsive transcription factor CRF1-like=Olea europaea var. sylvestris
LOC111375459	1.38428	2.61041	0.000326009	XP_022854050.1	ethylene-responsive transcription factor CRF2-like=Olea europaea var. sylvestris
LOC111368607	3.93506	15.2957	3.39e-21	XP_022845722.1	ethylene-responsive transcription factor ERF003-like=Olea europaea var. sylvestris
LOC111368854	0.632425	1.55017	0.000148408	XP_022846100.1	ethylene-responsive transcription factor ERF011-like=Olea europaea var. sylvestris
LOC111383528	1.98153	3.94913	2.83e-16	XP_022863412.1	ethylene-responsive transcription factor ERF038-like=Olea europaea var. sylvestris
LOC111367121	1.13088	2.18992	4.52e-06	XP_022843617.1	ethylene-responsive transcription factor ERF107-like=Olea europaea var. sylvestris
LOC111384776	2.26304	4.80001	3.96e-64	XP_022864867.1	ethylene-responsive transcription factor ERF118-like=Olea europaea var. sylvestris
LOC111366744	1.8176	3.52496	2.94e-48	XP_022843213.1	ethylene-responsive transcription factor RAP2-12-like=Olea europaea var. sylvestris
LOC111393394	1.79308	3.46555	1.38e-38	XP_022874669.1	ethylene-responsive transcription factor RAP2-3-like=Olea europaea var. sylvestris
LOC111382065	1.25553	2.38755	2.75e-06	XP_022861697.1	ethylene-responsive transcription factor RAP2-7-like=Olea europaea var. sylvestris
LOC111407872	1.00804	2.01117	2.36e-08	XP_022893335.1	ethylene-responsive transcription factor TINY-like=Olea europaea var. sylvestris
LOC111383997	1.83506	3.56787	1.52e-31	XP_022863964.1	ethylene-responsive transcription factor WIN1-like=Olea europaea var. sylvestris
LOC111368316	1.03898	2.05478	4.38e-10	XP_022845453.1	ethylene-responsive transcription factor WIN1-like=Olea europaea var. sylvestris
LOC111412195	1.50171	2.83178	4.63e-12	XP_022898776.1	floral homeotic protein AGAMOUS-like=Olea europaea var. sylvestris
LOC111384101	2.22299	4.6686	6.88e-21	XP_022864105.1	GATA transcription factor 11-like=Olea europaea var. sylvestris
LOC111404915	1.28166	2.43118	0.000722648	XP_022889408.1	GATA transcription factor 15-like=Olea europaea var. sylvestris
LOC111369862	0.978029	1.96977	0.00448287	XP_022847328.1	GATA transcription factor 15-like=Olea europaea var. sylvestris
LOC111371512	0.74025	1.67047	2.34e-06	XP_022849313.1	GATA transcription factor 16-like=Olea europaea var. sylvestris
LOC111393034	0.322402	1.25041	0.00665709	XP_022874204.1	GATA transcription factor 1-like=Olea europaea var. sylvestris
LOC111367387	1.53748	2.90288	1.43e-10	XP_022844001.1	GATA transcription factor 5-like=Olea europaea var. sylvestris
LOC111375523	0.975948	1.96693	1.75e-10	XP_022854130.1	GATA transcription factor 8-like=Olea europaea var. sylvestris
LOC111381748	0.907258	1.87548	5.58e-12	XP_022861425.1	GATA transcription factor 8-like=Olea europaea var. sylvestris
LOC111371772	5.58912	48.1387	7.24e-124	XP_022849691.1	growth-regulating factor 1-like=Olea europaea var. sylvestris
LOC111400220	1.52621	2.88029	1.15e-11	XP_022883414.1	growth-regulating factor 1-like=Olea europaea var. sylvestris
LOC111365442	1.00649	2.00902	6.2e-10	XP_022841753.1	growth-regulating factor 1-like=Olea europaea var. sylvestris
LOC111409443	0.83034	1.7781	0.000532121	XP_022895265.1	growth-regulating factor 1-like=Olea europaea var. sylvestris
LOC111403106	5.13952	35.2492	2.82e-36	XP_022887253.1	growth-regulating factor 3-like=Olea europaea var. sylvestris
LOC111386851	2.09359	4.2681	1.19e-35	XP_022867104.1	growth-regulating factor 3-like=Olea europaea var. sylvestris
LOC111404154	8.17735	289.486	5.29e-35	XP_022888685.1	growth-regulating factor 3-like=Olea europaea var. sylvestris
LOC111396271	4.47879	22.2971	1.35e-51	XP_022878427.1	growth-regulating factor 4-like=Olea europaea var. sylvestris
LOC111391621	3.16972	8.9987	1.52e-53	XP_022872638.1	growth-regulating factor 4-like=Olea europaea var. sylvestris
LOC111387331	2.04167	4.11722	4e-30	XP_022867653.1	growth-regulating factor 4-like=Olea europaea var. sylvestris
LOC111399989	4.9327	30.5415	3.69e-72	XP_022883235.1	growth-regulating factor 6-like=Olea europaea var. sylvestris
LOC111397447	4.79064	27.6775	2.97e-118	XP_022880159.1	growth-regulating factor 6-like=Olea europaea var. sylvestris
LOC111406149	5.47937	44.6124	1.09e-66	XP_022891145.1	growth-regulating factor 7-like=Olea europaea var. sylvestris
LOC111408796	0.753276	1.68562	0.0158101	XP_022894336.1	heat stress transcription factor B-4-like=Olea europaea var. sylvestris
LOC111374811	1.7179	3.28957	3.89e-07	XP_022853315.1	heat stress transcription factor C-1-like=Olea europaea var. sylvestris
LOC111383717	0.39209	1.31229	0.00993191	XP_022863625.1	light-inducible protein CPRF2-like=Olea europaea var. sylvestris
LOC111410278	0.826081	1.77286	1.71e-06	XP_022896314.1	MADS-box protein SVP-like=Olea europaea var. sylvestris
LOC111406193	1.9556	3.87876	2.22e-14	XP_022891230.1	myb family transcription factor PHL8-like=Olea europaea var. sylvestris
LOC111373941	0.966914	1.95466	0.016128	XP_022852313.1	myb family transcription factor PHL8-like=Olea europaea var. sylvestris
LOC111406159	2.4906	5.62011	9.93e-21	XP_022891165.1	NAC transcription factor 29-like=Olea europaea var. sylvestris
LOC111399538	1.0197	2.0275	1.16e-07	XP_022882676.1	nuclear transcription factor Y subunit A-10-like=Olea europaea var. sylvestris
LOC111392500	0.72973	1.65833	1.02e-06	XP_022873627.1	nuclear transcription factor Y subunit A-1-like=Olea europaea var. sylvestris
LOC111410494	1.96763	3.91124	5.3e-24	XP_022896618.1	nuclear transcription factor Y subunit A-4-like=Olea europaea var. sylvestris
LOC111368681	0.538998	1.45296	0.00555907	XP_022845843.1	nuclear transcription factor Y subunit A-7-like=Olea europaea var. sylvestris
LOC111376224	0.700387	1.62494	8.39e-08	XP_022854944.1	nuclear transcription factor Y subunit C-1-like=Olea europaea var. sylvestris
LOC111381221	1.1355	2.19695	9.02e-09	XP_022860746.1	probable transcription factor KAN2=Olea europaea var. sylvestris
LOC111387344	1.23182	2.34864	1.22e-06	XP_022867670.1	probable WRKY transcription factor 12=Olea europaea var. sylvestris
LOC111392291	1.45607	2.7436	6.21e-10	XP_022873371.1	probable WRKY transcription factor 2=Olea europaea var. sylvestris
LOC111391535	0.50422	1.41836	5.78e-05	XP_022872541.1	probable WRKY transcription factor 20=Olea europaea var. sylvestris
LOC111375544	0.599954	1.51567	0.000114666	XP_022854150.1	probable WRKY transcription factor 21=Olea europaea var. sylvestris
LOC111372036	0.646695	1.56558	0.0154686	XP_022849953.1	probable WRKY transcription factor 28=Olea europaea var. sylvestris
LOC111403319	1.04188	2.0589	7.08e-05	XP_022887540.1	probable WRKY transcription factor 3=Olea europaea var. sylvestris
LOC111380185	1.49848	2.82545	8.46e-08	XP_022859444.1	probable WRKY transcription factor 30=Olea europaea var. sylvestris
LOC111409915	0.639157	1.55742	0.0103693	XP_022895793.1	probable WRKY transcription factor 30=Olea europaea var. sylvestris
LOC111405194	1.15469	2.22637	9.1e-05	XP_022889738.1	probable WRKY transcription factor 40=Olea europaea var. sylvestris
LOC111401906	1.10867	2.15646	4.38e-07	XP_022885650.1	probable WRKY transcription factor 40=Olea europaea var. sylvestris
LOC111373803	1.4478	2.72792	1.02e-17	XP_022852134.1	probable WRKY transcription factor 57=Olea europaea var. sylvestris
LOC111405734	0.768761	1.70381	0.00249302	XP_022890524.1	probable WRKY transcription factor 65=Olea europaea var. sylvestris
LOC111385410	1.6371	3.11039	2.72e-07	XP_022865561.1	probable WRKY transcription factor 69=Olea europaea var. sylvestris
LOC111367203	0.592175	1.50752	1.6e-05	XP_022843726.1	probable WRKY transcription factor 7=Olea europaea var. sylvestris
LOC111392938	0.257522	1.19542	0.0242792	XP_022874117.1	probable WRKY transcription factor 70=Olea europaea var. sylvestris
LOC111397122	2.49823	5.6499	1.11e-25	XP_022879638.1	probable WRKY transcription factor 71=Olea europaea var. sylvestris
LOC111407238	1.14912	2.21778	3.95e-05	XP_022892370.1	probable WRKY transcription factor 71=Olea europaea var. sylvestris
LOC111397482	2.18959	4.56176	1.41e-07	XP_022880201.1	probable WRKY transcription factor 75=Olea europaea var. sylvestris
LOC111375927	2.04363	4.12283	7.69e-07	XP_022854620.1	probable WRKY transcription factor 75=Olea europaea var. sylvestris
LOC111374059	1.75831	3.38302	4.18e-36	XP_022852449.1	protein BRASSINAZOLE-RESISTANT 1-like=Olea europaea var. sylvestris
LOC111374224	1.60499	3.04193	0.000190074	XP_022852632.1	protein Brevis radix-like 4=Olea europaea var. sylvestris
LOC111366352	1.12314	2.17821	1.02e-07	XP_022842873.1	protein Brevis radix-like 4=Olea europaea var. sylvestris
LOC111405251	0.512208	1.42623	0.0200279	XP_022889823.1	protein Dr1 homolog=Olea europaea var. sylvestris
LOC111398511	2.15143	4.44269	2.7e-09	XP_022881217.1	protein SCARECROW-like=Olea europaea var. sylvestris
LOC111408145	0.992108	1.98909	4.06e-06	XP_022893717.1	protein SCARECROW-like=Olea europaea var. sylvestris
LOC111378915	0.803822	1.74572	2.95e-07	XP_022857960.1	protein SHORT-ROOT-like=Olea europaea var. sylvestris
LOC111390201	0.503052	1.41721	0.000410012	XP_022870973.1	protein SHORT-ROOT-like=Olea europaea var. sylvestris
LOC111391530	0.61575	1.53235	0.000623348	XP_022872530.1	scarecrow-like protein 21=Olea europaea var. sylvestris
LOC111373799	0.592906	1.50828	1.66e-05	XP_022852131.1	scarecrow-like protein 22=Olea europaea var. sylvestris
LOC111370390	0.562922	1.47726	0.000414886	XP_022847840.1	scarecrow-like protein 23=Olea europaea var. sylvestris
LOC111368834	2.67208	6.37347	1.12e-42	XP_022846070.1	scarecrow-like protein 28=Olea europaea var. sylvestris
LOC111407526	2.3175	4.98467	1.78e-19	XP_022892830.1	scarecrow-like protein 28=Olea europaea var. sylvestris
LOC111411897	1.11171	2.16102	2.23e-06	XP_022898321.1	scarecrow-like protein 3=Olea europaea var. sylvestris
LOC111365450	1.94589	3.85274	6.26e-16	XP_022841766.1	scarecrow-like protein 4=Olea europaea var. sylvestris
LOC111389206	0.420317	1.33822	0.021008	XP_022869865.1	scarecrow-like protein 4=Olea europaea var. sylvestris
LOC111367059	0.414911	1.33322	0.0273556	XP_022843522.1	scarecrow-like protein 5=Olea europaea var. sylvestris
LOC111380900	2.76218	6.78421	1.2e-55	XP_022860331.1	scarecrow-like protein 6=Olea europaea var. sylvestris
LOC111387967	1.97544	3.93249	1.65e-31	XP_022868378.1	scarecrow-like protein 6=Olea europaea var. sylvestris
LOC111395642	1.72243	3.29992	8.13e-07	XP_022877510.1	single-stranded DNA-binding protein WHY1, chloroplastic-like=Olea europaea var. sylvestris
LOC111402003	1.5917	3.01404	9.51e-08	XP_022885785.1	single-stranded DNA-binding protein WHY2, mitochondrial-like=Olea europaea var. sylvestris
LOC111386018	0.96551	1.95275	1.36e-07	XP_022866230.1	transcription factor ABA-INDUCIBLE bHLH-TYPE-like=Olea europaea var. sylvestris
LOC111377507	2.55111	5.86084	1.15e-76	XP_022856387.1	transcription factor AS1=Olea europaea var. sylvestris
LOC111368946	1.35646	2.56056	8.68e-09	XP_022846205.1	transcription factor AS1-like=Olea europaea var. sylvestris
LOC111399525	0.808237	1.75107	0.00779863	XP_022882657.1	transcription factor bHLH130=Olea europaea var. sylvestris
LOC111382325	1.01941	2.02709	8.04e-19	XP_022862032.1	transcription factor bHLH143-like=Olea europaea var. sylvestris
LOC111410211	0.72018	1.64739	1.16e-08	XP_022896225.1	transcription factor bHLH143-like=Olea europaea var. sylvestris
LOC111371745	1.03611	2.0507	1.54e-08	XP_022849653.1	transcription factor bHLH157-like=Olea europaea var. sylvestris
LOC111382706	1.64148	3.11985	0.000623148	XP_022862513.1	transcription factor bHLH162-like=Olea europaea var. sylvestris
LOC111408970	5.75233	53.9043	2.13e-160	XP_022894612.1	transcription factor bHLH18-like=Olea europaea var. sylvestris
LOC111408963	5.33535	40.3738	4.17e-74	XP_022894597.1	transcription factor bHLH18-like=Olea europaea var. sylvestris
LOC111401031	4.9255	30.3895	7.14e-87	XP_022884333.1	transcription factor bHLH18-like=Olea europaea var. sylvestris
LOC111391691	4.69158	25.8409	9.24e-135	XP_022872708.1	transcription factor bHLH18-like=Olea europaea var. sylvestris
LOC111391694	4.11962	17.3832	1.02e-101	XP_022872710.1	transcription factor bHLH18-like=Olea europaea var. sylvestris
LOC111398971	1.00103	2.00143	8.58e-05	XP_022881923.1	transcription factor bHLH30-like=Olea europaea var. sylvestris
LOC111401184	0.952044	1.93461	3.47e-05	XP_022884570.1	transcription factor bHLH30-like=Olea europaea var. sylvestris
LOC111396272	0.513209	1.42722	1.29e-05	XP_022878424.1	transcription factor bHLH30-like=Olea europaea var. sylvestris
LOC111366313	2.53426	5.79278	3.18e-38	XP_022842817.1	transcription factor bHLH35-like=Olea europaea var. sylvestris
LOC111391416	0.293291	1.22543	0.018966	XP_022872401.1	transcription factor bHLH3-like=Olea europaea var. sylvestris
LOC111365917	0.410516	1.32916	0.00307618	XP_022842243.1	transcription factor bHLH48-like=Olea europaea var. sylvestris
LOC111395916	1.43425	2.70242	5.73e-05	XP_022877909.1	transcription factor bHLH49-like=Olea europaea var. sylvestris
LOC111380296	6.11988	69.545	3.9e-15	XP_022859590.1	transcription factor bHLH61-like=Olea europaea var. sylvestris
LOC111371296	2.30828	4.95293	5.68e-43	XP_022848964.1	transcription factor bHLH62-like=Olea europaea var. sylvestris
LOC111399645	0.745888	1.67701	3.9e-08	XP_022882849.1	transcription factor bHLH66-like=Olea europaea var. sylvestris
LOC111405134	0.876575	1.83601	0.0179372	XP_022889656.1	transcription factor bHLH68-like=Olea europaea var. sylvestris
LOC111371239	0.667639	1.58847	0.000606721	XP_022849004.1	transcription factor bHLH68-like=Olea europaea var. sylvestris
LOC111408558	0.574937	1.48961	0.000823487	XP_022894073.1	transcription factor bHLH68-like=Olea europaea var. sylvestris
LOC111373704	3.63754	12.4454	9.62e-65	XP_022852049.1	transcription factor bHLH71-like=Olea europaea var. sylvestris
LOC111398785	2.59768	6.05311	1.18e-31	XP_022881646.1	transcription factor bHLH71-like=Olea europaea var. sylvestris
LOC111393769	1.20008	2.29753	2.7e-07	XP_022875233.1	transcription factor bHLH78-like=Olea europaea var. sylvestris
LOC111397236	4.33273	20.1503	6.11e-40	XP_022879822.1	transcription factor bHLH93-like=Olea europaea var. sylvestris
LOC111382832	2.00595	4.01653	2.12e-06	XP_022862645.1	transcription factor bHLH93-like=Olea europaea var. sylvestris
LOC111408061	1.47128	2.77268	2.82e-11	XP_022893594.1	transcription factor bHLH96-like=Olea europaea var. sylvestris
LOC111372400	0.856287	1.81037	4.04e-06	XP_022850512.1	transcription factor BIM1=Olea europaea var. sylvestris
LOC111368364	0.756658	1.68957	0.000237731	XP_022845361.1	transcription factor BIM1-like=Olea europaea var. sylvestris
LOC111397040	0.938462	1.91648	3.9e-09	XP_022879494.1	transcription factor BIM2-like=Olea europaea var. sylvestris
LOC111387638	0.725062	1.65297	0.0124804	XP_022867982.1	transcription factor CPC-like=Olea europaea var. sylvestris
LOC111365240	1.34852	2.54651	1.4e-10	XP_022841426.1	transcription factor DIVARICATA-like=Olea europaea var. sylvestris
LOC111365512	1.11726	2.16935	0.000362873	XP_022841835.1	transcription factor E2FA-like=Olea europaea var. sylvestris
LOC111378780	1.07362	2.10471	0.00052421	XP_022857787.1	transcription factor E2FA-like=Olea europaea var. sylvestris
LOC111405782	0.706499	1.63184	1.28e-08	XP_022890585.1	transcription factor EMB1444-like=Olea europaea var. sylvestris
LOC111398495	0.600302	1.51603	0.000559671	XP_022881193.1	transcription factor GLABRA 3-like=Olea europaea var. sylvestris
LOC111375106	0.387267	1.30791	0.00142912	XP_022853662.1	transcription factor GLABRA 3-like=Olea europaea var. sylvestris
LOC111396884	0.946873	1.92769	1.11e-08	XP_022879249.1	transcription factor ICE1=Olea europaea var. sylvestris
LOC111409246	1.29082	2.44667	6.85e-12	XP_022895027.1	transcription factor ICE1-like=Olea europaea var. sylvestris
LOC111397319	0.653427	1.5729	0.000146983	XP_022879938.1	transcription factor ILR3-like=Olea europaea var. sylvestris
LOC111412265	0.972931	1.96282	2.53e-13	XP_022898888.1	transcription factor LHW-like=Olea europaea var. sylvestris
LOC111400689	0.925771	1.8997	1.14e-05	XP_022883865.1	transcription factor LHW-like=Olea europaea var. sylvestris
LOC111382875	0.675452	1.5971	1.38e-08	XP_022862681.1	transcription factor LHW-like=Olea europaea var. sylvestris
LOC111388121	0.521425	1.43537	0.0129828	XP_022868562.1	transcription factor MYB124-like=Olea europaea var. sylvestris
LOC111378909	1.88581	3.6956	2.4e-13	XP_022857955.1	transcription factor MYB16-like=Olea europaea var. sylvestris
LOC111368629	1.66409	3.16915	6.16e-36	XP_022845750.1	transcription factor MYB16-like=Olea europaea var. sylvestris
LOC111383445	0.546707	1.46075	0.00438744	XP_022863326.1	transcription factor MYB1-like=Olea europaea var. sylvestris
LOC111398889	1.00579	2.00804	2.53e-10	XP_022881807.1	transcription factor MYB1R1-like=Olea europaea var. sylvestris
LOC111386247	4.82679	28.3798	6.99e-41	XP_022866471.1	transcription factor MYB20-like=Olea europaea var. sylvestris
LOC111397155	4.52385	23.0046	1.33e-40	XP_022879683.1	transcription factor MYB20-like=Olea europaea var. sylvestris
LOC111366508	5.216	37.1683	0.00350591	XP_022843018.1	transcription factor MYB26-like=Olea europaea var. sylvestris
LOC111374859	6.04837	66.1822	8.86e-26	XP_022853377.1	transcription factor MYB3R-1-like=Olea europaea var. sylvestris
LOC111374856	1.88901	3.70382	9.16e-16	XP_022853374.1	transcription factor MYB3R-1-like=Olea europaea var. sylvestris
LOC111376211	1.17103	2.25172	1.08e-11	XP_022854929.1	transcription factor MYB3R-1-like=Olea europaea var. sylvestris
LOC111381523	2.64055	6.23567	8.98e-12	XP_022861077.1	transcription factor MYB3R-4-like=Olea europaea var. sylvestris
LOC111380429	2.01491	4.04156	8.66e-19	XP_022859765.1	transcription factor MYB41-like=Olea europaea var. sylvestris
LOC111382658	1.89566	3.72092	6.41e-09	XP_022862460.1	transcription factor MYB41-like=Olea europaea var. sylvestris
LOC111410636	0.859614	1.81455	1.54e-05	XP_022896843.1	transcription factor MYB44-like=Olea europaea var. sylvestris
LOC111393344	1.54322	2.91444	2.58e-12	XP_022874612.1	transcription factor MYB4-like=Olea europaea var. sylvestris
LOC111389809	2.66884	6.35918	1.07e-13	XP_022870557.1	transcription factor MYB52-like=Olea europaea var. sylvestris
LOC111376429	1.84316	3.58794	3e-29	XP_022855161.1	transcription factor MYB61-like=Olea europaea var. sylvestris
LOC111401704	0.929907	1.90515	8.84e-11	XP_022885330.1	transcription factor MYB61-like=Olea europaea var. sylvestris
LOC111395856	0.829382	1.77692	0.0157345	XP_022877822.1	transcription factor MYB63=Olea europaea var. sylvestris
LOC111375491	2.56773	5.92875	3.85e-75	XP_022854097.1	transcription factor MYB8-like=Olea europaea var. sylvestris
LOC111407653	2.45203	5.47187	1.69e-84	XP_022893036.1	transcription factor MYB8-like=Olea europaea var. sylvestris
LOC111394551	0.791634	1.73103	0.000124316	XP_022876184.1	transcription factor MYB8-like=Olea europaea var. sylvestris
LOC111372114	2.07247	4.20607	1.24e-06	XP_022850060.1	transcription factor MYBS1-like=Olea europaea var. sylvestris
LOC111401430	0.431929	1.34904	0.00696359	XP_022884932.1	transcription factor MYBS1-like=Olea europaea var. sylvestris
LOC111399867	3.91906	15.1271	1.98e-52	XP_022883124.1	transcription factor MYBS3-like=Olea europaea var. sylvestris
LOC111411962	1.42209	2.67974	1.86e-07	XP_022898434.1	transcription factor MYC2-like=Olea europaea var. sylvestris
LOC111396393	1.69411	3.23578	1.36e-37	XP_022878599.1	transcription factor MYC4-like=Olea europaea var. sylvestris
LOC111385758	0.55465	1.46881	1.83e-07	XP_022865945.1	transcription factor MYC4-like=Olea europaea var. sylvestris
LOC111367969	1.93101	3.81322	1.33e-28	XP_022844889.1	transcription factor PRE5-like=Olea europaea var. sylvestris
LOC111401437	1.15722	2.23027	0.00849514	XP_022884937.1	transcription factor RADIALIS-like=Olea europaea var. sylvestris
LOC111404141	2.47368	5.55457	5.06e-26	XP_022888664.1	transcription factor RAX2=Olea europaea var. sylvestris
LOC111372198	0.770741	1.70615	0.00151545	XP_022850193.1	transcription factor RAX2-like=Olea europaea var. sylvestris
LOC111403467	0.527386	1.44132	0.00677204	XP_022887748.1	transcription factor RF2a-like=Olea europaea var. sylvestris
LOC111406041	1.12393	2.17939	0.00300911	XP_022890989.1	transcription factor RF2b=Olea europaea var. sylvestris
LOC111387628	1.31476	2.4876	0.000182855	XP_022867965.1	transcription factor RF2b-like=Olea europaea var. sylvestris
LOC111388895	1.13315	2.19337	2.74e-08	XP_022869488.1	transcription factor SAC51-like=Olea europaea var. sylvestris
LOC111380262	4.05431	16.6138	7.34e-14	XP_022859544.1	transcription factor SCREAM2-like=Olea europaea var. sylvestris
LOC111385432	0.767938	1.70283	2.06e-08	XP_022865587.1	transcription factor SRM1-like=Olea europaea var. sylvestris
LOC111376540	0.621912	1.53891	0.000190248	XP_022855278.1	transcription factor SRM1-like=Olea europaea var. sylvestris
LOC111380693	0.249419	1.18873	0.0200113	XP_022860094.1	transcription factor TCP13-like=Olea europaea var. sylvestris
LOC111371312	2.01995	4.05571	2.12e-23	XP_022848988.1	transcription factor TCP14-like=Olea europaea var. sylvestris
LOC111405261	1.09655	2.13842	0.00135009	XP_022889834.1	transcription factor TCP14-like=Olea europaea var. sylvestris
LOC111368040	1.01339	2.01865	0.000520495	XP_022844972.1	transcription factor TCP14-like=Olea europaea var. sylvestris
LOC111396208	0.945388	1.92571	0.000337356	XP_022878329.1	transcription factor TCP15-like=Olea europaea var. sylvestris
LOC111380382	1.70911	3.2696	3.2e-26	XP_022859694.1	transcription factor TCP23-like=Olea europaea var. sylvestris
LOC111386232	1.18817	2.27864	1.48e-07	XP_022866453.1	transcription factor TCP23-like=Olea europaea var. sylvestris
LOC111386571	2.16413	4.48196	1.66e-70	XP_022866802.1	transcription factor TCP2-like=Olea europaea var. sylvestris
LOC111407260	1.21953	2.3287	3.15e-11	XP_022892409.1	transcription factor TCP2-like=Olea europaea var. sylvestris
LOC111370521	1.06941	2.09858	0.000282001	XP_022848010.1	transcription factor TCP3-like=Olea europaea var. sylvestris
LOC111391585	3.04617	8.26019	8.71e-32	XP_022872601.1	transcription factor TCP4-like=Olea europaea var. sylvestris
LOC111370820	2.5958	6.04523	2.24e-45	XP_022848466.1	transcription factor TCP4-like=Olea europaea var. sylvestris
LOC111402545	2.26432	4.80427	1.3e-22	XP_022886694.1	transcription factor TCP4-like=Olea europaea var. sylvestris
LOC111368886	1.54618	2.92043	3.43e-05	XP_022846144.1	transcription factor TCP4-like=Olea europaea var. sylvestris
LOC111395448	1.38241	2.60703	2.64e-09	XP_022877211.1	transcription factor TCP4-like=Olea europaea var. sylvestris
LOC111382932	0.706873	1.63226	0.00423344	XP_022862742.1	transcription factor TCP4-like=Olea europaea var. sylvestris
LOC111365350	0.700503	1.62507	0.000104184	XP_022841600.1	transcription factor TCP7-like=Olea europaea var. sylvestris
LOC111394783	2.05514	4.15584	7.46e-13	XP_022876534.1	transcription factor TCP8-like=Olea europaea var. sylvestris
LOC111411782	1.2231	2.33447	4.23e-11	XP_022898148.1	transcription factor TCP8-like=Olea europaea var. sylvestris
LOC111409830	0.632188	1.54991	1.78e-06	XP_022895673.1	transcription factor TCP8-like=Olea europaea var. sylvestris
LOC111387403	0.469252	1.38439	0.00165096	XP_022867725.1	transcription factor TCP8-like=Olea europaea var. sylvestris
LOC111392633	0.874173	1.83296	2.32e-09	XP_022873774.1	transcription factor TGA2.2-like=Olea europaea var. sylvestris
LOC111372372	0.67953	1.60162	0.00294093	XP_022850452.1	transcription factor TGA2.2-like=Olea europaea var. sylvestris
LOC111402114	0.604939	1.52091	0.0130604	XP_022885958.1	transcription factor TGA2.2-like=Olea europaea var. sylvestris
LOC111407615	0.454846	1.37064	0.00525143	XP_022892999.1	transcription factor TGA2.3-like=Olea europaea var. sylvestris
LOC111411485	0.846703	1.79839	0.0146456	XP_022897801.1	transcription factor UNE12-like=Olea europaea var. sylvestris
LOC111411839	0.463948	1.37931	0.0031432	XP_022898240.1	transcription factor UNE12-like=Olea europaea var. sylvestris
LOC111399555	0.953267	1.93625	0.0107144	XP_022882715.1	transcription factor-like protein DPB=Olea europaea var. sylvestris
LOC111399382	0.725924	1.65396	0.000625892	XP_022882426.1	trihelix transcription factor ASIL2-like=Olea europaea var. sylvestris
LOC111377433	0.364929	1.28782	0.0241456	XP_022856296.1	trihelix transcription factor ASIL2-like=Olea europaea var. sylvestris
LOC111367783	0.406189	1.32518	0.012017	XP_022844613.1	trihelix transcription factor GT-2-like=Olea europaea var. sylvestris
LOC111369304	1.57016	2.96938	2.04e-18	XP_022846533.1	trihelix transcription factor GT-4-like=Olea europaea var. sylvestris
LOC111383678	2.26909	4.8202	6.66e-38	XP_022863579.1	trihelix transcription factor GTL2=Olea europaea var. sylvestris
LOC111411538	0.885688	1.84765	3.46e-11	XP_022897826.1	trihelix transcription factor GTL2-like=Olea europaea var. sylvestris
LOC111370737	1.78467	3.44539	1.77e-39	XP_022848358.1	trihelix transcription factor PTL-like=Olea europaea var. sylvestris
LOC111395945	1.75405	3.37305	2.37e-09	XP_022877948.1	WRKY transcription factor 6-like=Olea europaea var. sylvestris

## Sheet: P14 vs. P0_DOWN
P14 vs. P28_DOWN
Genes	log2FoldChange	FoldChange	p value	Gene_ID	Description
LOC111386298	-3.89067	-14.8323	3.97e-18	XP_022866530.1	ABSCISIC ACID-INSENSITIVE 5-like protein 2=Olea europaea var. sylvestris
LOC111411924	-1.03536	-2.04962	0.000180497	XP_022898369.1	ABSCISIC ACID-INSENSITIVE 5-like protein 2=Olea europaea var. sylvestris
LOC111394682	-0.435193	-1.35209	0.00301631	XP_022876389.1	ABSCISIC ACID-INSENSITIVE 5-like protein 6=Olea europaea var. sylvestris
LOC111410615	-0.88261	-1.84371	1.45e-13	XP_022896817.1	ABSCISIC ACID-INSENSITIVE 5-like protein 7=Olea europaea var. sylvestris
LOC111381185	-0.553963	-1.46811	4.04e-06	XP_022860701.1	ABSCISIC ACID-INSENSITIVE 5-like protein 7=Olea europaea var. sylvestris
LOC111394613	-1.4526	-2.737	0.000566255	XP_022876287.1	agamous-like MADS-box protein AGL18=Olea europaea var. sylvestris
LOC111368020	-2.81467	-7.0356	3.7e-69	XP_022844951.1	agamous-like MADS-box protein AGL65=Olea europaea var. sylvestris
LOC111399031	-0.950348	-1.93234	5.08e-07	XP_022881998.1	AP2/ERF and B3 domain-containing transcription factor RAV1=Olea europaea var. sylvestris
LOC111376876	-1.51638	-2.86072	9.19e-07	XP_022855920.1	AP2-like ethylene-responsive transcription factor TOE3=Olea europaea var. sylvestris
LOC111374034	-0.916153	-1.88708	6.06e-09	XP_022852417.1	auxin response factor 18-like=Olea europaea var. sylvestris
LOC111375524	-0.748823	-1.68042	0.0264976	XP_022854132.1	auxin response factor 18-like=Olea europaea var. sylvestris
LOC111365464	-0.531325	-1.44526	0.00937542	XP_022841785.1	auxin response factor 18-like=Olea europaea var. sylvestris
LOC111366891	-1.16088	-2.23594	5.15e-19	XP_022843346.1	auxin response factor 19-like=Olea europaea var. sylvestris
LOC111366099	-1.09261	-2.1326	9.2e-21	XP_022842521.1	auxin response factor 19-like=Olea europaea var. sylvestris
LOC111399798	-0.882753	-1.84389	1.61e-14	XP_022883057.1	auxin response factor 19-like=Olea europaea var. sylvestris
LOC111406439	-0.628433	-1.54589	9.76e-05	XP_022891632.1	auxin response factor 2A-like=Olea europaea var. sylvestris
LOC111407245	-0.89409	-1.85844	4.74e-12	XP_022892388.1	auxin response factor 3-like=Olea europaea var. sylvestris
LOC111388546	-3.31272	-9.93635	1.21e-77	XP_022869058.1	basic helix-loop-helix protein A=Olea europaea var. sylvestris
LOC111367898	-1.48474	-2.79867	1.81e-12	XP_022844772.1	basic leucine zipper 43-like=Olea europaea var. sylvestris
LOC111383943	-1.83877	-3.57705	7.63e-09	XP_022863905.1	basic leucine zipper 4-like=Olea europaea var. sylvestris
LOC111392914	-0.877096	-1.83667	0.00751499	XP_022874095.1	basic leucine zipper 61-like=Olea europaea var. sylvestris
LOC111402542	-1.05752	-2.08136	0.000361519	XP_022886690.1	basic leucine zipper 6-like=Olea europaea var. sylvestris
LOC111388590	-1.20107	-2.2991	2.8e-21	XP_022869115.1	basic leucine zipper 9-like=Olea europaea var. sylvestris
LOC111402252	-0.749279	-1.68095	0.000807967	XP_022886187.1	BES1/BZR1 homolog protein 4-like=Olea europaea var. sylvestris
LOC111412113	-0.645372	-1.56414	0.0012902	XP_022898656.1	bZIP transcription factor 11-like=Olea europaea var. sylvestris
LOC111413004	-2.26445	-4.80472	5.25e-102	XP_022899651.1	bZIP transcription factor 17-like=Olea europaea var. sylvestris
LOC111385344	-0.785679	-1.7239	0.00236914	XP_022865495.1	bZIP transcription factor 18-like=Olea europaea var. sylvestris
LOC111394582	-1.46334	-2.75747	2.62e-32	XP_022876240.1	bZIP transcription factor 44-like=Olea europaea var. sylvestris
LOC111401347	-0.493485	-1.40784	0.000693675	XP_022884813.1	bZIP transcription factor 46-like=Olea europaea var. sylvestris
LOC111394672	-0.729944	-1.65858	1.76e-12	XP_022876371.1	bZIP transcription factor 53-like=Olea europaea var. sylvestris
LOC111405735	-0.58407	-1.49907	3.79e-08	XP_022890525.1	bZIP transcription factor 53-like=Olea europaea var. sylvestris
LOC111387409	-0.908747	-1.87741	4.11e-12	XP_022867730.1	bZIP transcription factor 60-like=Olea europaea var. sylvestris
LOC111392864	-0.49259	-1.40697	0.0145809	XP_022874030.1	bZIP transcription factor 60-like=Olea europaea var. sylvestris
LOC111381229	-0.816222	-1.76079	0.000440396	XP_022860754.1	bZIP transcription factor 68-like=Olea europaea var. sylvestris
LOC111377766	-0.718071	-1.64498	1.05e-05	XP_022856664.1	dr1-associated corepressor homolog=Olea europaea var. sylvestris
LOC111397367	-1.07475	-2.10636	0.00519533	XP_022880029.1	dr1-associated corepressor-like=Olea europaea var. sylvestris
LOC111388199	-1.07459	-2.10613	2.71e-14	XP_022868653.1	ethylene-responsive transcription factor 1-like=Olea europaea var. sylvestris
LOC111370775	-2.17358	-4.51141	1.48e-51	XP_022848405.1	ethylene-responsive transcription factor 3-like=Olea europaea var. sylvestris
LOC111376495	-1.80332	-3.49024	1.79e-40	XP_022855225.1	ethylene-responsive transcription factor 3-like=Olea europaea var. sylvestris
LOC111395747	-1.49131	-2.81144	4.63e-21	XP_022877649.1	ethylene-responsive transcription factor 3-like=Olea europaea var. sylvestris
LOC111368803	-1.2678	-2.40794	0.00150367	XP_022846029.1	ethylene-responsive transcription factor 3-like=Olea europaea var. sylvestris
LOC111381486	-1.99026	-3.97308	2.43e-74	XP_022861038.1	ethylene-responsive transcription factor 4-like=Olea europaea var. sylvestris
LOC111395465	-1.39678	-2.63314	1.24e-36	XP_022877236.1	ethylene-responsive transcription factor 4-like=Olea europaea var. sylvestris
LOC111379518	-0.688146	-1.61121	8.69e-11	XP_022858676.1	ethylene-responsive transcription factor 4-like=Olea europaea var. sylvestris
LOC111379291	-1.26765	-2.40769	1.67e-22	XP_022858417.1	ethylene-responsive transcription factor 5-like=Olea europaea var. sylvestris
LOC111405547	-1.07658	-2.10903	1.22e-16	XP_022890260.1	ethylene-responsive transcription factor 5-like=Olea europaea var. sylvestris
LOC111397387	-2.4602	-5.50293	1.76e-23	XP_022880057.1	ethylene-responsive transcription factor ABR1-like=Olea europaea var. sylvestris
LOC111409375	-1.74315	-3.34766	4.48e-22	XP_022895197.1	ethylene-responsive transcription factor ABR1-like=Olea europaea var. sylvestris
LOC111402954	-1.45892	-2.74903	0.000640876	XP_022887053.1	ethylene-responsive transcription factor CRF1-like=Olea europaea var. sylvestris
LOC111400879	-1.00664	-2.00923	2.92e-06	XP_022884093.1	ethylene-responsive transcription factor CRF4-like=Olea europaea var. sylvestris
LOC111385757	-3.23087	-9.38835	1.08e-51	XP_022865941.1	ethylene-responsive transcription factor ERF008-like=Olea europaea var. sylvestris
LOC111394504	-1.6333	-3.10221	3.58e-09	XP_022876127.1	ethylene-responsive transcription factor ERF010-like=Olea europaea var. sylvestris
LOC111401352	-1.64753	-3.13296	4.58e-23	XP_022884823.1	ethylene-responsive transcription factor ERF011-like=Olea europaea var. sylvestris
LOC111367878	-0.985202	-1.97959	0.000196359	XP_022844732.1	ethylene-responsive transcription factor ERF011-like=Olea europaea var. sylvestris
LOC111404291	-2.24277	-4.73305	6.05e-73	XP_022888889.1	ethylene-responsive transcription factor ERF017-like=Olea europaea var. sylvestris
LOC111411371	-1.8648	-3.64217	1.78e-33	XP_022897679.1	ethylene-responsive transcription factor ERF017-like=Olea europaea var. sylvestris
LOC111368831	-5.90559	-59.9458	0	XP_022846068.1	ethylene-responsive transcription factor ERF027-like=Olea europaea var. sylvestris
LOC111402882	-2.0859	-4.24541	6.63e-42	XP_022886965.1	ethylene-responsive transcription factor ERF061=Olea europaea var. sylvestris
LOC111408635	-1.99665	-3.99073	6.22e-07	XP_022894144.1	ethylene-responsive transcription factor ERF069-like=Olea europaea var. sylvestris
LOC111406367	-1.53295	-2.89376	2.13e-06	XP_022891566.1	ethylene-responsive transcription factor ERF071-like=Olea europaea var. sylvestris
LOC111406366	-1.37717	-2.59758	0.000102537	XP_022891565.1	ethylene-responsive transcription factor ERF071-like=Olea europaea var. sylvestris
LOC111386756	-1.46423	-2.75916	6.45e-14	XP_022866990.1	ethylene-responsive transcription factor ERF104-like=Olea europaea var. sylvestris
LOC111391077	-5.54029	-46.5364	2.78e-200	XP_022871987.1	ethylene-responsive transcription factor ERF110-like=Olea europaea var. sylvestris
LOC111396122	-2.0992	-4.2847	2.49e-21	XP_022878201.1	ethylene-responsive transcription factor ERF113-like=Olea europaea var. sylvestris
LOC111408666	-1.81301	-3.51374	2.76e-25	XP_022894167.1	ethylene-responsive transcription factor ERF113-like=Olea europaea var. sylvestris
LOC111381215	-0.522665	-1.43661	2.63e-05	XP_022860734.1	ethylene-responsive transcription factor ERF113-like=Olea europaea var. sylvestris
LOC111408106	-1.76873	-3.40755	6.63e-17	XP_022893661.1	ethylene-responsive transcription factor ERF116-like=Olea europaea var. sylvestris
LOC111387814	-0.420241	-1.33815	0.000376427	XP_022868171.1	ethylene-responsive transcription factor ERF118-like=Olea europaea var. sylvestris
LOC111374896	-1.14643	-2.21365	2.37e-28	XP_022853422.1	ethylene-responsive transcription factor RAP2-12-like=Olea europaea var. sylvestris
LOC111367665	-0.535197	-1.44914	0.000495685	XP_022844420.1	ethylene-responsive transcription factor RAP2-12-like=Olea europaea var. sylvestris
LOC111389556	-1.77595	-3.42464	5.83e-25	XP_022870251.1	ethylene-responsive transcription factor RAP2-13-like=Olea europaea var. sylvestris
LOC111397420	-1.47675	-2.78321	3.98e-42	XP_022880107.1	ethylene-responsive transcription factor RAP2-13-like=Olea europaea var. sylvestris
LOC111367521	-1.15985	-2.23434	5.28e-27	XP_022844217.1	ethylene-responsive transcription factor RAP2-13-like=Olea europaea var. sylvestris
LOC111389555	-1.12209	-2.17662	1.69e-05	XP_022870250.1	ethylene-responsive transcription factor RAP2-13-like=Olea europaea var. sylvestris
LOC111403560	-2.30869	-4.95434	1.71e-10	XP_022887882.1	ethylene-responsive transcription factor RAP2-3-like=Olea europaea var. sylvestris
LOC111408879	-0.914317	-1.88468	1.5e-18	XP_022894462.1	ethylene-responsive transcription factor RAP2-4-like=Olea europaea var. sylvestris
LOC111394820	-0.315197	-1.24418	0.00250751	XP_022876599.1	ethylene-responsive transcription factor RAP2-4-like=Olea europaea var. sylvestris
LOC111366883	-2.73051	-6.63688	2.81e-29	XP_022843339.1	ethylene-responsive transcription factor RAP2-9-like=Olea europaea var. sylvestris
LOC111366136	-1.96228	-3.89676	3.05e-28	XP_022842585.1	ethylene-responsive transcription factor TINY-like=Olea europaea var. sylvestris
LOC111365791	-4.67718	-25.5842	5.5e-20	XP_022842081.1	ethylene-responsive transcription factor WIN1-like=Olea europaea var. sylvestris
LOC111378040	-5.32421	-40.0633	1.15e-102	XP_022856967.1	floral homeotic protein DEFICIENS=Olea europaea var. sylvestris
LOC111400231	-0.321607	-1.24972	0.00436266	XP_022883427.1	GATA transcription factor 11-like=Olea europaea var. Sylvestris
LOC111409963	-1.22897	-2.34399	8.21e-07	XP_022895867.1	GATA transcription factor 16-like=Olea europaea var. sylvestris
LOC111379931	-1.00839	-2.01166	2.96e-05	XP_022859145.1	GATA transcription factor 28=Olea europaea var. sylvestris
LOC111406485	-1.43915	-2.7116	6.23e-18	XP_022891729.1	GATA transcription factor 28-like=Olea europaea var. sylvestris
LOC111412101	-1.84677	-3.59695	2.89e-33	XP_022898637.1	GATA transcription factor 5-like=Olea europaea var. sylvestris
LOC111374921	-0.301831	-1.23271	0.00540535	XP_022853453.1	GATA transcription factor 5-like=Olea europaea var. sylvestris
LOC111380711	-0.460057	-1.3756	0.00129871	XP_022860118.1	GATA transcription factor 7-like=Olea europaea var. sylvestris
LOC111405443	-0.451885	-1.36783	0.000471531	XP_022890098.1	GATA transcription factor 8-like=Olea europaea var. sylvestris
LOC111383230	-3.3143	-9.94725	5.85e-18	XP_022863081.1	GATA transcription factor 9-like=Olea europaea var. sylvestris
LOC111372953	-2.48552	-5.60037	3.85e-34	XP_022851153.1	GATA transcription factor 9-like=Olea europaea var. sylvestris
LOC111367835	-2.34671	-5.08664	3.55e-22	XP_022844667.1	GATA transcription factor 9-like=Olea europaea var. sylvestris
LOC111401073	-0.869877	-1.82751	0.0101837	XP_022884383.1	G-box-binding factor 1-like=Olea europaea var. sylvestris
LOC111401460	-0.774979	-1.71117	0.00832276	XP_022884967.1	growth-regulating factor 1-like=Olea europaea var. sylvestris
LOC111383844	-0.659707	-1.57976	0.0122585	XP_022863784.1	heat stress transcription factor A-3-like=Olea europaea var. sylvestris
LOC111370510	-0.963338	-1.94982	7.98e-06	XP_022847997.1	heat stress transcription factor A-4a-like=Olea europaea var. sylvestris
LOC111372740	-1.5221	-2.87208	2.54e-25	XP_022850898.1	heat stress transcription factor A-4c-like=Olea europaea var. sylvestris
LOC111412150	-0.890702	-1.85408	7.08e-05	XP_022898708.1	heat stress transcription factor A-4c-like=Olea europaea var. sylvestris
LOC111389281	-1.28743	-2.44094	2.63e-32	XP_022869962.1	heat stress transcription factor A-5-like=Olea europaea var. sylvestris
LOC111393619	-0.777888	-1.71462	9.09e-10	XP_022875004.1	heat stress transcription factor A-5-like=Olea europaea var. sylvestris
LOC111402033	-2.32333	-5.00485	9.22e-17	XP_022885842.1	heat stress transcription factor A-6b-like=Olea europaea var. sylvestris
LOC111384732	-1.58526	-3.00061	2.04e-06	XP_022864817.1	heat stress transcription factor A-8-like=Olea europaea var. sylvestris
LOC111405590	-1.90692	-3.75008	4.99e-32	XP_022890308.1	heat stress transcription factor B-2a-like=Olea europaea var. sylvestris
LOC111393146	-1.53553	-2.89895	1.41e-30	XP_022874316.1	heat stress transcription factor B-2a-like=Olea europaea var. sylvestris
LOC111368492	-2.40368	-5.29149	1.47e-21	XP_022845525.1	heat stress transcription factor B-2b-like=Olea europaea var. sylvestris
LOC111390787	-1.05092	-2.07185	2.25e-14	XP_022871663.1	heat stress transcription factor B-2b-like=Olea europaea var. sylvestris
LOC111382372	-0.845804	-1.79727	5.33e-10	XP_022862085.1	heat stress transcription factor B-2b-like=Olea europaea var. sylvestris
LOC111392365	-1.64347	-3.12417	2.64e-08	XP_022873469.1	heat stress transcription factor B-3-like=Olea europaea var. sylvestris
LOC111403872	-1.1831	-2.27065	1.47e-05	XP_022888274.1	heat stress transcription factor B-3-like=Olea europaea var. sylvestris
LOC111397258	-1.09035	-2.12925	3.55e-11	XP_022879858.1	heat stress transcription factor C-1-like=Olea europaea var. sylvestris
LOC111377484	-0.496762	-1.41104	1.91e-05	XP_022856358.1	light-inducible protein CPRF2-like=Olea europaea var. sylvestris
LOC111378339	-0.888382	-1.8511	2.87e-14	XP_022857290.1	MADS-box protein 04g005320-like=Olea europaea var. sylvestris
LOC111382532	-0.744549	-1.67545	0.014645	XP_022862308.1	MADS-box protein AGL42-like=Olea europaea var. sylvestris
LOC111402875	-1.10104	-2.1451	3.01e-07	XP_022886957.1	MADS-box protein AGL71-like=Olea europaea var. sylvestris
LOC111372629	-1.32591	-2.5069	9.31e-12	XP_022850778.1	MADS-box protein EJ2-like=Olea europaea var. sylvestris
LOC111367513	-2.20099	-4.59794	5.63e-10	XP_022844202.1	MADS-box protein JOINTLESS=Olea europaea var. sylvestris
LOC111410288	-0.680884	-1.60312	0.0253849	XP_022896325.1	MADS-box protein SVP-like=Olea europaea var. sylvestris
LOC111386317	-4.14869	-17.737	1.94e-26	XP_022866551.1	MADS-box transcription factor 23-like=Olea europaea var. sylvestris
LOC111394664	-1.32106	-2.49849	6.61e-09	XP_022876357.1	MADS-box transcription factor 27-like=Olea europaea var. sylvestris
LOC111391554	-0.72167	-1.64909	1.85e-05	XP_022872561.1	MADS-box transcription factor 6=Olea europaea var. sylvestris
LOC111398838	-0.758627	-1.69188	0.0265877	XP_022881723.1	MADS-box transcription factor 7-like=Olea europaea var. sylvestris
LOC111384056	-1.8911	-3.70919	4.17e-08	XP_022864041.1	MADS-box transcription factor ANR1-like=Olea europaea var. sylvestris
LOC111394663	-1.54137	-2.91072	3.79e-09	XP_022876356.1	MADS-box transcription factor ANR1-like=Olea europaea var. sylvestris
LOC111410012	-0.998763	-1.99829	0.000532219	XP_022895932.1	myb family transcription factor EFM-like=Olea europaea var. sylvestris
LOC111366383	-0.717352	-1.64416	0.00168467	XP_022842928.1	myb family transcription factor EFM-like=Olea europaea var. sylvestris
LOC111399698	-1.95733	-3.88343	1.21e-19	XP_022882925.1	myb family transcription factor PHL5-like=Olea europaea var. sylvestris
LOC111396900	-0.507518	-1.4216	4.9e-05	XP_022879268.1	myb family transcription factor PHL7-like=Olea europaea var. sylvestris
LOC111392341	-8.8157	-450.598	1.38e-267	XP_022873432.1	Myb-related protein 305-like=Olea europaea var. sylvestris
LOC111372807	-1.71041	-3.27253	3.18e-09	XP_022850977.1	NAC transcription factor 29-like=Olea europaea var. sylvestris
LOC111402364	-1.40561	-2.64929	2.11e-26	XP_022886370.1	NAC transcription factor 32-like=Olea europaea var. sylvestris
LOC111402519	-5.53898	-46.4943	2.12e-300	XP_022886657.1	NAC transcription factor 56-like=Olea europaea var. sylvestris
LOC111393458	-5.20119	-36.7886	4.1e-207	XP_022874757.1	NAC transcription factor 56-like=Olea europaea var. sylvestris
LOC111389453	-2.03795	-4.10661	1.73e-35	XP_022870138.1	NAC transcription factor 56-like=Olea europaea var. sylvestris
LOC111403489	-0.652736	-1.57215	0.000467996	XP_022887783.1	nuclear transcription factor Y subunit A-1-like=Olea europaea var. sylvestris
LOC111411684	-0.463189	-1.37859	9.44e-05	XP_022898002.1	nuclear transcription factor Y subunit A-4-like=Olea europaea var. sylvestris
LOC111403153	-2.47317	-5.55264	1.62e-20	XP_022887318.1	nuclear transcription factor Y subunit B-10-like=Olea europaea var. sylvestris
LOC111369411	-1.10025	-2.14392	1.46e-05	XP_022846685.1	nuclear transcription factor Y subunit B-10-like=Olea europaea var. sylvestris
LOC111395837	-0.858411	-1.81304	0.00132497	XP_022877788.1	nuclear transcription factor Y subunit B-1-like=Olea europaea var. sylvestris
LOC111404099	-0.785969	-1.72425	0.00159343	XP_022888604.1	nuclear transcription factor Y subunit B-1-like=Olea europaea var. sylvestris
LOC111402484	-0.594564	-1.51002	5.56e-07	XP_022886602.1	nuclear transcription factor Y subunit B-3-like=Olea europaea var. sylvestris
LOC111376852	-0.592023	-1.50736	2.46e-05	XP_022855621.1	nuclear transcription factor Y subunit B-3-like=Olea europaea var. sylvestris
LOC111401813	-0.674283	-1.5958	1.46e-06	XP_022885495.1	nuclear transcription factor Y subunit C-1=Olea europaea var. sylvestris
LOC111373929	-0.577895	-1.49267	0.000252062	XP_022852291.1	nuclear transcription factor Y subunit C-1-like=Olea europaea var. sylvestris
LOC111368569	-0.776581	-1.71307	1.87e-08	XP_022845654.1	nuclear transcription factor Y subunit C-2-like=Olea europaea var. sylvestris
LOC111396619	-0.319178	-1.24762	0.0131504	XP_022878803.1	nuclear transcription factor Y subunit C-3-like=Olea europaea var. Sylvestris
LOC111382128	-0.68673	-1.60963	1.52e-08	XP_022861770.1	nuclear transcription factor Y subunit C-9-like=Olea europaea var. sylvestris
LOC111383977	-1.02725	-2.03814	2.84e-17	XP_022863948.1	probable transcription factor At3g04930=Olea europaea var. sylvestris
LOC111381180	-1.19477	-2.28908	5.77e-22	XP_022860691.1	probable transcription factor At5g28040=Olea europaea var. sylvestris
LOC111390531	-6.08789	-68.0201	4.61e-86	XP_022871350.1	probable transcription factor At5g61620=Olea europaea var. sylvestris
LOC111403470	-3.14429	-8.84152	5.73e-07	XP_022887750.1	probable transcription factor PosF21=Olea europaea var. sylvestris
LOC111396693	-1.97412	-3.92888	7.6e-05	XP_022878922.1	probable transcription factor PosF21=Olea europaea var. sylvestris
LOC111384363	-1.70948	-3.27042	4.52e-35	XP_022864406.1	probable transcription factor PosF21=Olea europaea var. sylvestris
LOC111380199	-1.26294	-2.39985	3.82e-14	XP_022859459.1	probable transcription factor PosF21=Olea europaea var. sylvestris
LOC111408668	-1.12221	-2.1768	0.00014751	XP_022894170.1	probable WRKY transcription factor 13=Olea europaea var. sylvestris
LOC111368697	-1.01609	-2.02243	0.000483213	XP_022845869.1	probable WRKY transcription factor 14=Olea europaea var. sylvestris
LOC111368851	-1.14869	-2.21712	1.7e-05	XP_022846095.1	probable WRKY transcription factor 15=Olea europaea var. sylvestris
LOC111396663	-0.866074	-1.8227	5.41e-10	XP_022878880.1	probable WRKY transcription factor 17=Olea europaea var. sylvestris
LOC111370917	-6.07275	-67.3099	5.69e-211	XP_022848588.1	probable WRKY transcription factor 2=Olea europaea var. sylvestris
LOC111390599	-0.584124	-1.49913	1.43e-07	XP_022871428.1	probable WRKY transcription factor 2=Olea europaea var. sylvestris
LOC111379764	-6.16548	-71.7784	1.05e-168	XP_022858972.1	probable WRKY transcription factor 20=Olea europaea var. sylvestris
LOC111402477	-0.358663	-1.28224	0.00363199	XP_022886587.1	probable WRKY transcription factor 20=Olea europaea var. sylvestris
LOC111388449	-1.10652	-2.15325	6.11e-05	XP_022868921.1	probable WRKY transcription factor 23=Olea europaea var. sylvestris
LOC111407693	-1.04148	-2.05834	0.000593274	XP_022893099.1	probable WRKY transcription factor 23=Olea europaea var. sylvestris
LOC111383526	-0.369248	-1.29168	0.0136139	XP_022863407.1	probable WRKY transcription factor 26=Olea europaea var. sylvestris
LOC111389584	-1.83145	-3.55895	6.25e-49	XP_022870279.1	probable WRKY transcription factor 31=Olea europaea var. sylvestris
LOC111399313	-0.847707	-1.79964	2.79e-09	XP_022882328.1	probable WRKY transcription factor 33=Olea europaea var. sylvestris
LOC111405948	-0.530948	-1.44488	0.000556361	XP_022890848.1	probable WRKY transcription factor 33=Olea europaea var. sylvestris
LOC111407314	-1.94926	-3.86177	9.82e-22	XP_022892495.1	probable WRKY transcription factor 35=Olea europaea var. sylvestris
LOC111400902	-0.620531	-1.53744	1.79e-06	XP_022884128.1	probable WRKY transcription factor 4=Olea europaea var. sylvestris
LOC111386053	-1.50083	-2.83005	4.98e-13	XP_022866251.1	probable WRKY transcription factor 41=Olea europaea var. sylvestris
LOC111411943	-0.986495	-1.98137	2.43e-16	XP_022898404.1	probable WRKY transcription factor 46=Olea europaea var. sylvestris
LOC111376693	-0.589488	-1.50471	0.00137107	XP_022855431.1	probable WRKY transcription factor 48=Olea europaea var. sylvestris
LOC111402874	-1.81937	-3.52927	2.52e-23	XP_022886946.1	probable WRKY transcription factor 53=Olea europaea var. sylvestris
LOC111381082	-0.813965	-1.75804	3.99e-10	XP_022860568.1	probable WRKY transcription factor 53=Olea europaea var. sylvestris
LOC111379198	-0.41941	-1.33738	0.00717804	XP_022858312.1	probable WRKY transcription factor 53=Olea europaea var. sylvestris
LOC111403024	-0.400908	-1.32034	0.000882416	XP_022887137.1	probable WRKY transcription factor 53=Olea europaea var. sylvestris
LOC111385748	-0.965319	-1.9525	0.000703784	XP_022865932.1	probable WRKY transcription factor 7=Olea europaea var. sylvestris
LOC111374780	-1.18529	-2.2741	4.96e-21	XP_022853284.1	probable WRKY transcription factor 70=Olea europaea var. sylvestris
LOC111374837	-2.22555	-4.67689	3.59e-08	XP_022853346.1	protein Dr1 homolog=Olea europaea var. sylvestris
LOC111402354	-1.5875	-3.00527	1.27e-07	XP_022886354.1	protein Dr1 homolog=Olea europaea var. sylvestris
LOC111377879	-0.923541	-1.89677	5.36e-06	XP_022856789.1	protein SHORT-ROOT-like=Olea europaea var. sylvestris
LOC111396796	-0.550519	-1.46461	0.000300934	XP_022879084.1	scarecrow-like protein 1=Olea europaea var. sylvestris
LOC111408732	-0.500615	-1.41482	5.77e-06	XP_022894259.1	scarecrow-like protein 1=Olea europaea var. sylvestris
LOC111395898	-1.29478	-2.45339	1.74e-30	XP_022877882.1	scarecrow-like protein 13=Olea europaea var. sylvestris
LOC111393529	-4.6036	-24.3121	2.31e-69	XP_022874865.1	scarecrow-like protein 14=Olea europaea var. sylvestris
LOC111407544	-0.356827	-1.28061	0.0010308	XP_022892874.1	scarecrow-like protein 14=Olea europaea var. sylvestris
LOC111379178	-0.740875	-1.67119	3.05e-06	XP_022858287.1	scarecrow-like protein 15=Olea europaea var. sylvestris
LOC111401071	-0.708222	-1.63379	4.33e-05	XP_022884381.1	scarecrow-like protein 15=Olea europaea var. sylvestris
LOC111389861	-0.608925	-1.52512	4.16e-05	XP_022870605.1	scarecrow-like protein 15=Olea europaea var. sylvestris
LOC111403941	-1.87972	-3.68005	1.1e-10	XP_022888392.1	scarecrow-like protein 21=Olea europaea var. sylvestris
LOC111395674	-1.52191	-2.87171	7.16e-39	XP_022877549.1	scarecrow-like protein 21=Olea europaea var. sylvestris
LOC111381245	-2.3775	-5.19634	1.43e-28	XP_022860768.1	scarecrow-like protein 3=Olea europaea var. sylvestris
LOC111391983	-1.93933	-3.83527	1.04e-06	XP_022873042.1	scarecrow-like protein 3=Olea europaea var. sylvestris
LOC111377566	-1.20899	-2.31176	7.55e-11	XP_022856462.1	scarecrow-like protein 3=Olea europaea var. sylvestris
LOC111369670	-0.324514	-1.25224	0.0156514	XP_022847042.1	scarecrow-like protein 30=Olea europaea var. sylvestris
LOC111367616	-0.548019	-1.46208	0.00100875	XP_022844355.1	scarecrow-like protein 4=Olea europaea var. sylvestris
LOC111409888	-1.95737	-3.88353	2.07e-52	XP_022895752.1	scarecrow-like protein 6=Olea europaea var. sylvestris
LOC111393263	-1.89447	-3.71786	6.39e-60	XP_022874491.1	scarecrow-like protein 8=Olea europaea var. sylvestris
LOC111385606	-0.931277	-1.90696	5.72e-05	XP_022865781.1	scarecrow-like protein 9=Olea europaea var. sylvestris
LOC111412051	-0.516225	-1.43021	0.000590733	XP_022898562.1	scarecrow-like transcription factor PAT1=Olea europaea var. sylvestris
LOC111373091	-1.1212	-2.17527	0.00102237	XP_022851338.1	TGACG-sequence-specific DNA-binding protein TGA-1A-like=Olea europaea var. sylvestris
LOC111365890	-1.48577	-2.80066	8.88e-28	XP_022842187.1	TGACG-sequence-specific DNA-binding protein TGA-2.1-like=Olea europaea var. sylvestris
LOC111384917	-2.03948	-4.11096	4.79e-33	XP_022865031.1	transcription factor ABA-INDUCIBLE bHLH-TYPE-like=Olea europaea var. sylvestris
LOC111385988	-2.35612	-5.11993	2.27e-83	XP_022866179.1	transcription factor BHLH089-like=Olea europaea var. sylvestris
LOC111386554	-0.563129	-1.47747	0.00209681	XP_022866787.1	transcription factor BHLH094-like=Olea europaea var. sylvestris
LOC111392640	-1.21521	-2.32174	1.89e-14	XP_022873785.1	transcription factor bHLH104-like=Olea europaea var. sylvestris
LOC111389380	-2.00116	-4.00322	1.61e-11	XP_022870071.1	transcription factor bHLH112-like=Olea europaea var. sylvestris
LOC111402312	-1.7068	-3.26435	5.01e-12	XP_022886300.1	transcription factor bHLH112-like=Olea europaea var. sylvestris
LOC111370683	-0.926213	-1.90028	0.0100334	XP_022848281.1	transcription factor bHLH112-like=Olea europaea var. sylvestris
LOC111368534	-0.629573	-1.54711	0.00729755	XP_022845586.1	transcription factor bHLH112-like=Olea europaea var. sylvestris
LOC111395682	-1.79426	-3.46837	2.06e-12	XP_022877559.1	transcription factor bHLH123-like=Olea europaea var. sylvestris
LOC111377644	-0.963116	-1.94952	0.00197085	XP_022856537.1	transcription factor bHLH123-like=Olea europaea var. sylvestris
LOC111386608	-1.24368	-2.36803	2.62e-08	XP_022866848.1	transcription factor bHLH130-like=Olea europaea var. sylvestris
LOC111371702	-2.141	-4.41068	1.11e-51	XP_022849627.1	transcription factor bHLH137-like=Olea europaea var. sylvestris
LOC111411949	-0.875653	-1.83484	1.62e-07	XP_022898411.1	transcription factor bHLH13-like=Olea europaea var. sylvestris
LOC111409927	-0.740324	-1.67055	4.6e-12	XP_022895816.1	transcription factor bHLH13-like=Olea europaea var. sylvestris
LOC111411950	-0.708582	-1.6342	3.95e-05	XP_022898412.1	transcription factor bHLH13-like=Olea europaea var. sylvestris
LOC111379331	-0.578386	-1.49318	5.55e-07	XP_022858455.1	transcription factor bHLH143-like=Olea europaea var. sylvestris
LOC111407244	-0.425167	-1.34273	3.05e-05	XP_022892382.1	transcription factor bHLH144-like=Olea europaea var. sylvestris
LOC111371528	-1.23781	-2.35841	5.84e-19	XP_022849337.1	transcription factor bHLH148=Olea europaea var. sylvestris
LOC111387491	-1.28532	-2.43736	2.01e-20	XP_022867820.1	transcription factor bHLH148-like=Olea europaea var. sylvestris
LOC111392113	-0.469744	-1.38486	0.0117083	XP_022873149.1	transcription factor bHLH148-like=Olea europaea var. sylvestris
LOC111390158	-1.59103	-3.01265	4.9e-12	XP_022870936.1	transcription factor bHLH149-like=Olea europaea var. sylvestris
LOC111384934	-1.50456	-2.83739	1.42e-13	XP_022865052.1	transcription factor bHLH149-like=Olea europaea var. sylvestris
LOC111409989	-0.976787	-1.96808	1.09e-09	XP_022895900.1	transcription factor bHLH149-like=Olea europaea var. sylvestris
LOC111409864	-0.362533	-1.28568	0.0176327	XP_022895713.1	transcription factor bHLH149-like=Olea europaea var. sylvestris
LOC111403479	-0.516718	-1.4307	5.22e-05	XP_022887773.1	transcription factor bHLH153-like=Olea europaea var. sylvestris
LOC111392899	-1.63985	-3.11634	3.02e-07	XP_022874081.1	transcription factor bHLH162-like=Olea europaea var. sylvestris
LOC111377810	-1.15891	-2.23289	5.66e-11	XP_022856705.1	transcription factor bHLH162-like=Olea europaea var. sylvestris
LOC111377804	-0.899208	-1.86504	2.88e-07	XP_022856700.1	transcription factor bHLH162-like=Olea europaea var. sylvestris
LOC111407256	-2.36513	-5.15198	1.24e-42	XP_022892405.1	transcription factor bHLH30-like=Olea europaea var. sylvestris
LOC111412218	-1.32426	-2.50404	4.17e-12	XP_022898819.1	transcription factor bHLH35-like=Olea europaea var. sylvestris
LOC111373519	-1.04783	-2.06742	2.4e-05	XP_022851827.1	transcription factor bHLH35-like=Olea europaea var. sylvestris
LOC111378532	-0.871821	-1.82997	0.000414998	XP_022857521.1	transcription factor bHLH35-like=Olea europaea var. sylvestris
LOC111375538	-0.53622	-1.45017	0.000387004	XP_022854140.1	transcription factor bHLH3-like=Olea europaea var. sylvestris
LOC111411855	-0.474478	-1.38942	1.75e-05	XP_022898256.1	transcription factor bHLH3-like=Olea europaea var. sylvestris
LOC111377398	-1.909	-3.75548	4.39e-10	XP_022856260.1	transcription factor bHLH47-like=Olea europaea var. sylvestris
LOC111371310	-0.918865	-1.89063	6.5e-06	XP_022848987.1	transcription factor bHLH47-like=Olea europaea var. sylvestris
LOC111378013	-0.805958	-1.74831	2.96e-05	XP_022856947.1	transcription factor bHLH48-like=Olea europaea var. sylvestris
LOC111403032	-0.514385	-1.42839	0.000169012	XP_022887145.1	transcription factor bHLH51-like=Olea europaea var. sylvestris
LOC111371538	-2.10592	-4.30473	4.18e-23	XP_022849349.1	transcription factor bHLH62-like=Olea europaea var. sylvestris
LOC111403762	-1.0938	-2.13436	1.57e-20	XP_022888150.1	transcription factor bHLH66-like=Olea europaea var. sylvestris
LOC111366881	-0.75953	-1.69294	0.00561193	XP_022843335.1	transcription factor bHLH68-like=Olea europaea var. sylvestris
LOC111389185	-0.419443	-1.33741	0.0137988	XP_022869846.1	transcription factor bHLH69-like=Olea europaea var. sylvestris
LOC111371771	-0.860876	-1.81614	2.04e-13	XP_022849690.1	transcription factor bHLH74-like=Olea europaea var. sylvestris
LOC111374802	-2.46661	-5.52743	2.06e-28	XP_022853307.1	transcription factor bHLH78-like=Olea europaea var. sylvestris
LOC111396647	-0.727109	-1.65532	1.53e-09	XP_022878848.1	transcription factor bHLH78-like=Olea europaea var. sylvestris
LOC111401666	-3.55857	-11.7825	1.73e-77	XP_022885281.1	transcription factor bHLH79-like=Olea europaea var. sylvestris
LOC111372244	-1.14076	-2.20497	5.91e-16	XP_022850256.1	transcription factor bHLH80-like=Olea europaea var. sylvestris
LOC111367290	-6.3436	-81.2108	1.55e-18	XP_022843857.1	transcription factor bHLH87=Olea europaea var. sylvestris
LOC111401887	-1.4534	-2.73854	2.7e-33	XP_022885625.1	transcription factor BIM1-like=Olea europaea var. sylvestris
LOC111406182	-1.67735	-3.1984	2.82e-16	XP_022891200.1	transcription factor BIM2-like=Olea europaea var. sylvestris
LOC111387943	-3.47775	-11.1406	5.66e-106	XP_022868345.1	transcription factor BPE=Olea europaea var. sylvestris
LOC111375227	-2.55009	-5.85669	1.24e-36	XP_022853794.1	transcription factor DIVARICATA-like=Olea europaea var. sylvestris
LOC111381608	-1.45213	-2.73612	3.92e-20	XP_022861176.1	transcription factor DIVARICATA-like=Olea europaea var. sylvestris
LOC111365662	-1.32594	-2.50697	3.06e-08	XP_022841973.1	transcription factor DIVARICATA-like=Olea europaea var. sylvestris
LOC111383637	-0.842778	-1.7935	0.000545334	XP_022863522.1	transcription factor DIVARICATA-like=Olea europaea var. sylvestris
LOC111393855	-0.84049	-1.79066	9.62e-09	XP_022875364.1	transcription factor DIVARICATA-like=Olea europaea var. sylvestris
LOC111387260	-3.91401	-15.0742	2.85e-21	XP_022867574.1	transcription factor DUO1-like=Olea europaea var. sylvestris
LOC111394838	-3.11369	-8.65593	2.03e-73	XP_022876628.1	transcription factor GAMYB=Olea europaea var. sylvestris
LOC111411667	-4.47713	-22.2715	5.16e-153	XP_022897990.1	transcription factor GAMYB-like=Olea europaea var. sylvestris
LOC111379399	-2.84796	-7.19984	2.65e-30	XP_022858524.1	transcription factor GAMYB-like=Olea europaea var. sylvestris
LOC111403430	-2.77622	-6.85054	2.74e-61	XP_022887700.1	transcription factor GAMYB-like=Olea europaea var. sylvestris
LOC111405871	-1.87984	-3.68035	2.72e-34	XP_022890723.1	transcription factor GAMYB-like=Olea europaea var. sylvestris
LOC111393971	-0.62715	-1.54451	1.51e-08	XP_022875533.1	transcription factor GLABRA 3-like=Olea europaea var. sylvestris
LOC111410316	-3.33072	-10.0611	1.4e-89	XP_022896352.1	transcription factor HBI1-like=Olea europaea var. sylvestris
LOC111391969	-2.40639	-5.30148	1.08e-23	XP_022873018.1	transcription factor HBI1-like=Olea europaea var. sylvestris
LOC111365456	-2.23577	-4.71014	7.13e-11	XP_022841774.1	transcription factor HBI1-like=Olea europaea var. sylvestris
LOC111399033	-2.09374	-4.26855	8.11e-27	XP_022882001.1	transcription factor HHO3-like=Olea europaea var. sylvestris
LOC111373841	-1.25948	-2.3941	5.72e-08	XP_022852190.1	transcription factor HHO3-like=Olea europaea var. sylvestris
LOC111381388	-0.509437	-1.4235	0.000519349	XP_022860939.1	transcription factor HHO5-like=Olea europaea var. sylvestris
LOC111380087	-0.845358	-1.79671	4.21e-06	XP_022859319.1	transcription factor HY5=Olea europaea var. sylvestris
LOC111387499	-1.35982	-2.56653	2.35e-14	XP_022867828.1	transcription factor HY5-like=Olea europaea var. sylvestris
LOC111407064	-5.29442	-39.2446	7.73e-31	XP_022892165.1	transcription factor IBH1=Olea europaea var. sylvestris
LOC111383288	-3.54745	-11.692	5.15e-80	XP_022863135.1	transcription factor IBH1-like 1=Olea europaea var. sylvestris
LOC111403738	-3.18529	-9.09637	5.47e-91	XP_022888115.1	transcription factor IBH1-like 1=Olea europaea var. sylvestris
LOC111393752	-1.19797	-2.29417	0.000342907	XP_022875210.1	transcription factor IBH1-like=Olea europaea var. sylvestris
LOC111368499	-1.6309	-3.09706	2.82e-21	XP_022845535.1	transcription factor ILR3-like=Olea europaea var. sylvestris
LOC111395652	-0.730092	-1.65874	2.61e-07	XP_022877511.1	transcription factor ILR3-like=Olea europaea var. sylvestris
LOC111370787	-0.404057	-1.32322	0.00198861	XP_022848421.1	transcription factor ILR3-like=Olea europaea var. sylvestris
LOC111380252	-1.81465	-3.51775	1.25e-06	XP_022859533.1	transcription factor KUA1-like=Olea europaea var. sylvestris
LOC111382117	-0.520257	-1.43421	9.46e-05	XP_022861755.1	transcription factor LHW-like=Olea europaea var. sylvestris
LOC111373107	-1.88151	-3.68462	1.17e-36	XP_022851356.1	transcription factor MYB108-like=Olea europaea var. sylvestris
LOC111371563	-1.37568	-2.5949	4.85e-32	XP_022849384.1	transcription factor MYB108-like=Olea europaea var. sylvestris
LOC111374139	-2.33997	-5.06293	1.56e-43	XP_022852538.1	transcription factor MYB1R1-like=Olea europaea var. sylvestris
LOC111387946	-1.29389	-2.45189	4.39e-18	XP_022868347.1	transcription factor MYB1R1-like=Olea europaea var. sylvestris
LOC111409999	-0.972731	-1.96255	8.5e-19	XP_022895919.1	transcription factor MYB1R1-like=Olea europaea var. sylvestris
LOC111383638	-1.18321	-2.27082	0.000275479	XP_022863525.1	transcription factor MYB25-like=Olea europaea var. sylvestris
LOC111374231	-1.10947	-2.15766	4.41e-12	XP_022852649.1	transcription factor MYB25-like=Olea europaea var. sylvestris
LOC111376452	-1.06411	-2.09088	0.00314966	XP_022855178.1	transcription factor MYB25-like=Olea europaea var. sylvestris
LOC111388925	-0.501021	-1.41521	0.00752113	XP_022869522.1	transcription factor MYB3R-3-like=Olea europaea var. sylvestris
LOC111399724	-0.629241	-1.54675	0.00757612	XP_022882955.1	transcription factor MYB3R-5-like=Olea europaea var. sylvestris
LOC111374749	-0.626187	-1.54348	0.000325848	XP_022853254.1	transcription factor MYB3R-5-like=Olea europaea var. sylvestris
LOC111367212	-1.42313	-2.68166	3.73e-10	XP_022843735.1	transcription factor MYB44-like=Olea europaea var. sylvestris
LOC111378816	-1.15056	-2.22001	2.02e-09	XP_022857855.1	transcription factor MYB44-like=Olea europaea var. sylvestris
LOC111378815	-1.01383	-2.01926	6.02e-10	XP_022857854.1	transcription factor MYB44-like=Olea europaea var. sylvestris
LOC111409021	-0.762394	-1.6963	8.48e-12	XP_022894683.1	transcription factor MYB44-like=Olea europaea var. sylvestris
LOC111403615	-7.42203	-171.496	1.54e-27	XP_022887954.1	transcription factor MYB44-like=Olea europaea var. sylvestris
LOC111411268	-6.39506	-84.1599	2.33e-129	XP_022897603.1	transcription factor MYB52-like=Olea europaea var. sylvestris
LOC111396299	-2.17629	-4.51991	3.83e-47	XP_022878458.1	transcription factor MYB62-like=Olea europaea var. sylvestris
LOC111399001	-1.50398	-2.83624	2.79e-16	XP_022881965.1	transcription factor MYB62-like=Olea europaea var. sylvestris
LOC111369339	-0.730751	-1.6595	4.11e-09	XP_022846587.1	transcription factor MYB62-like=Olea europaea var. sylvestris
LOC111408990	-1.58382	-2.99762	2.63e-05	XP_022894639.1	transcription factor MYB87-like=Olea europaea var. sylvestris
LOC111387960	-0.681076	-1.60333	0.00805534	XP_022868364.1	transcription factor MYBC1-like=Olea europaea var. sylvestris
LOC111367828	-4.7739	-27.3581	1.77e-110	XP_022844658.1	transcription factor MYBS3-like=Olea europaea var. sylvestris
LOC111384602	-2.26053	-4.79169	6.73e-45	XP_022864679.1	transcription factor MYBS3-like=Olea europaea var. sylvestris
LOC111386751	-0.909272	-1.8781	8.03e-10	XP_022866983.1	transcription factor MYBS3-like=Olea europaea var. sylvestris
LOC111367874	-0.609171	-1.52538	0.000728001	XP_022844726.1	transcription factor NIGTH1-like=Olea europaea var. sylvestris
LOC111374728	-1.1015	-2.14577	5.15e-07	XP_022853226.1	transcription factor PCL1-like=Olea europaea var. sylvestris
LOC111384888	-2.36143	-5.13879	2.28e-17	XP_022864997.1	transcription factor PIF3-like=Olea europaea var. sylvestris
LOC111382213	-1.16944	-2.24925	7.45e-14	XP_022861908.1	transcription factor PIF3-like=Olea europaea var. sylvestris
LOC111410790	-0.666164	-1.58685	3.48e-10	XP_022897091.1	transcription factor PIF3-like=Olea europaea var. sylvestris
LOC111412744	-0.333734	-1.26027	0.00291282	XP_022899431.1	transcription factor PIF4-like=Olea europaea var. sylvestris
LOC111388132	-2.81394	-7.03205	4.1e-40	XP_022868576.1	transcription factor PRE6-like=Olea europaea var. sylvestris
LOC111401219	-0.441838	-1.35833	0.000152093	XP_022884629.1	transcription factor Pur-alpha 1=Olea europaea var. sylvestris
LOC111401009	-0.607875	-1.52401	0.00547806	XP_022884305.1	transcription factor SPATULA-like=Olea europaea var. sylvestris
LOC111405941	-1.28442	-2.43585	1.71e-24	XP_022890831.1	transcription factor SRM1-like=Olea europaea var. sylvestris
LOC111395589	-1.5687	-2.96637	1.62e-11	XP_022877412.1	transcription factor TCP15-like=Olea europaea var. sylvestris
LOC111388122	-0.636734	-1.5548	0.00196692	XP_022868564.1	transcription factor TCP15-like=Olea europaea var. sylvestris
LOC111373658	-1.10672	-2.15355	0.00225978	XP_022851995.1	transcription factor TCP19-like=Olea europaea var. sylvestris
LOC111408798	-1.05445	-2.07693	3.67e-12	XP_022894340.1	transcription factor TCP20-like=Olea europaea var. sylvestris
LOC111382963	-1.65009	-3.13854	2.63e-26	XP_022862778.1	transcription factor TCP2-like=Olea europaea var. sylvestris
LOC111372416	-2.08895	-4.25439	5.74e-10	XP_022850528.1	transcription factor TCP5-like=Olea europaea var. sylvestris
LOC111410222	-0.529055	-1.44298	0.00417246	XP_022896243.1	transcription factor TCP9-like=Olea europaea var. sylvestris
LOC111385088	-1.92981	-3.81006	1.65e-09	XP_022865223.1	transcription factor TGA1-like=Olea europaea var. sylvestris
LOC111410858	-0.518972	-1.43293	0.000843167	XP_022897201.1	transcription factor UNE10-like=Olea europaea var. sylvestris
LOC111380629	-0.450814	-1.36681	0.0228857	XP_022860013.1	transcription factor VIP1=Olea europaea var. sylvestris
LOC111391196	-0.663396	-1.58381	0.000333019	XP_022872128.1	transcription factor-like protein DPB=Olea europaea var. sylvestris
LOC111380880	-1.95421	-3.87503	4.74e-29	XP_022860308.1	trihelix transcription factor ASIL2-like=Olea europaea var. sylvestris
LOC111412170	-1.08195	-2.11689	4.41e-14	XP_022898736.1	trihelix transcription factor ASIL2-like=Olea europaea var. sylvestris
LOC111391519	-0.803127	-1.74488	4.39e-05	XP_022872518.1	trihelix transcription factor ASIL2-like=Olea europaea var. Sylvestris
LOC111370535	-0.510248	-1.4243	0.000466639	XP_022848046.1	trihelix transcription factor ASIL2-like=Olea europaea var. sylvestris
LOC111407887	-0.47131	-1.38637	0.00226376	XP_022893352.1	trihelix transcription factor ASIL2-like=Olea europaea var. sylvestris
LOC111403411	-0.334902	-1.26129	0.0129323	XP_022887682.1	trihelix transcription factor ASR3=Olea europaea var. sylvestris
LOC111408750	-1.75667	-3.37918	2.65e-49	XP_022894282.1	trihelix transcription factor GT-2-like=Olea europaea var. sylvestris
LOC111376152	-1.02882	-2.04036	4.3e-19	XP_022854864.1	trihelix transcription factor GT-2-like=Olea europaea var. sylvestris
LOC111402064	-0.955226	-1.93888	3.96e-13	XP_022885876.1	trihelix transcription factor GT-2-like=Olea europaea var. sylvestris
LOC111372220	-0.545342	-1.45937	0.000171225	XP_022850213.1	trihelix transcription factor GT-2-like=Olea europaea var. sylvestris
LOC111385494	-0.773709	-1.70966	1.31e-05	XP_022865658.1	trihelix transcription factor GTL1-like=Olea europaea var. sylvestris
LOC111403309	-0.795894	-1.73615	0.0170068	XP_022887526.1	truncated transcription factor CAULIFLOWER A-like=Olea europaea var. sylvestris
LOC111380019	-4.52193	-22.974	4e-63	XP_022859249.1	uncharacterized protein At3g50808-like=Olea europaea var. sylvestris
LOC111387581	-0.987899	-1.98329	7.86e-09	XP_022867926.1	uncharacterized protein At3g50808-like=Olea europaea var. sylvestris
LOC111409737	-3.58132	-11.9697	7.78e-23	XP_022895514.1	WRKY transcription factor 22-like=Olea europaea var. sylvestris
LOC111404734	-1.48955	-2.80801	3.58e-18	XP_022889267.1	WRKY transcription factor 44-like=Olea europaea var. sylvestris
LOC111389364	-2.84157	-7.16801	8.01e-139	XP_022870055.1	WRKY transcription factor 6-like=Olea europaea var. sylvestris
LOC111384954	-0.781717	-1.71918	0.00345812	XP_022865070.1	WRKY transcription factor 6-like=Olea europaea var. sylvestris
LOC111410746	-0.525674	-1.43961	7.8e-05	XP_022897013.1	zinc finger transcription factor YY1=Olea europaea var. sylvestris
LOC111387413	-1.24872	-2.37631	1e-06	XP_022867744.1	zinc finger transcription factor YY1-like=Olea europaea var. sylvestris

## Sheet: P28 vs. P14_UP
P28 vs. P14_UP
Genes	log2FoldChange	FoldChange	p value	Gene_ID	Description
LOC111374366	1.53162	2.89111	2.77344e-12	XP_022852796.1	agamous-like MADS-box protein AGL11=Olea europaea var. sylvestris
LOC111402059	0.776431	1.71289	4.23922e-05	XP_022885868.1	agamous-like MADS-box protein AGL81=Olea europaea var. sylvestris
LOC111371974	0.733897	1.66313	0.000260904	XP_022849884.1	agamous-like MADS-box protein AGL81=Olea europaea var. sylvestris
LOC111368704	0.716208	1.64286	6.84871e-06	XP_022845880.1	AP2-like ethylene-responsive transcription factor At2g41710=Olea europaea var. sylvestris
LOC111409930	1.04445	2.06258	5.09163e-08	XP_022895821.1	auxin response factor 18-like=Olea europaea var. sylvestris
LOC111385610	0.882186	1.84317	0.00111949	XP_022865785.1	auxin response factor 18-like=Olea europaea var. sylvestris
LOC111375524	0.856695	1.81089	0.00669262	XP_022854132.1	auxin response factor 18-like=Olea europaea var. sylvestris
LOC111371065	1.40984	2.65708	0.000873748	XP_022848749.1	auxin response factor 4-like=Olea europaea var. sylvestris
LOC111385592	0.80014	1.74127	2.97338e-07	XP_022865769.1	auxin response factor 4-like=Olea europaea var. sylvestris
LOC111380460	0.96923	1.9578	9.89769e-13	XP_022859803.1	auxin response factor 8-like=Olea europaea var. sylvestris
LOC111368066	0.627138	1.5445	6.95552e-06	XP_022845024.1	auxin response factor 8-like=Olea europaea var. sylvestris
LOC111390474	1.17514	2.25816	4.45087e-06	XP_022871290.1	auxin response factor 9-like=Olea europaea var. sylvestris
LOC111375479	0.822867	1.76892	3.21753e-05	XP_022854076.1	auxin response factor 9-like=Olea europaea var. sylvestris
LOC111371732	0.654534	1.57411	0.00399149	XP_022849636.1	auxin response factor 9-like=Olea europaea var. sylvestris
LOC111381921	0.607498	1.52361	0.00908072	XP_022861541.1	auxin response factor 9-like=Olea europaea var. sylvestris
LOC111410797	1.32869	2.51175	6.19192e-06	XP_022897098.1	B3 domain-containing protein At3g18960-like=Olea europaea var. sylvestris
LOC111411584	0.566377	1.4808	0.00133958	XP_022897855.1	B3 domain-containing protein At3g19184-like=Olea europaea var. sylvestris
LOC111398964	0.422841	1.34057	0.00264147	XP_022881912.1	B3 domain-containing protein At4g01580-like=Olea europaea var. sylvestris
LOC111411585	0.613803	1.53029	0.00171098	XP_022897857.1	B3 domain-containing protein At5g42700-like=Olea europaea var. sylvestris
LOC111381254	0.91303	1.883	0.00071429	XP_022860802.1	B3 domain-containing protein Os01g0234100-like=Olea europaea var. sylvestris
LOC111380139	0.533326	1.44726	0.00101778	XP_022859391.1	B3 domain-containing protein Os01g0234100-like=Olea europaea var. sylvestris
LOC111367105	1.06102	2.0864	2.07382e-07	XP_022843588.1	B3 domain-containing protein Os01g0905400-like=Olea europaea var. sylvestris
LOC111402542	1.38836	2.61782	6.43505e-07	XP_022886690.1	basic leucine zipper 6-like=Olea europaea var. sylvestris
LOC111394924	0.703753	1.62874	0.00053755	XP_022876739.1	bZIP transcription factor 11-like=Olea europaea var. sylvestris
LOC111385344	0.789807	1.72884	0.0013477	XP_022865495.1	bZIP transcription factor 18-like=Olea europaea var. sylvestris
LOC111398121	0.872729	1.83112	1.93721e-08	XP_022880858.1	developmental protein SEPALLATA 3=Olea europaea var. sylvestris
LOC111401639	0.648748	1.56781	0.000267717	XP_022885233.1	E2F transcription factor-like E2FE=Olea europaea var. sylvestris
LOC111368854	0.950386	1.93239	1.61737e-06	XP_022846100.1	ethylene-responsive transcription factor ERF011-like=Olea europaea var. sylvestris
LOC111392205	1.49994	2.82832	0.000133764	XP_022873253.1	ethylene-responsive transcription factor ERF027-like=Olea europaea var. sylvestris
LOC111383528	0.87101	1.82894	3.65102e-05	XP_022863412.1	ethylene-responsive transcription factor ERF038-like=Olea europaea var. sylvestris
LOC111402882	0.987979	1.9834	0.000109701	XP_022886965.1	ethylene-responsive transcription factor ERF061=Olea europaea var. sylvestris
LOC111406367	1.61958	3.07286	5.3476e-10	XP_022891566.1	ethylene-responsive transcription factor ERF071-like=Olea europaea var. sylvestris
LOC111403560	1.17425	2.25676	0.00206235	XP_022887882.1	ethylene-responsive transcription factor RAP2-3-like=Olea europaea var. sylvestris
LOC111371498	0.622068	1.53908	0.00122255	XP_022849293.1	ethylene-responsive transcription factor RAP2-3-like=Olea europaea var. sylvestris
LOC111383997	0.874721	1.83365	8.29669e-05	XP_022863964.1	ethylene-responsive transcription factor WIN1-like=Olea europaea var. sylvestris
LOC111369788	0.546001	1.46003	0.00902163	XP_022847201.1	ethylene-responsive transcription factor-like protein At4g13040=Olea europaea var. sylvestris
LOC111373696	0.682877	1.60534	0.00648567	XP_022852042.1	floral homeotic protein AGAMOUS-like=Olea europaea var. sylvestris
LOC111372819	0.666738	1.58748	0.000468704	XP_022850997.1	GATA transcription factor 11-like=Olea europaea var. sylvestris
LOC111379931	0.509356	1.42341	0.00446542	XP_022859145.1	GATA transcription factor 28=Olea europaea var. sylvestris
LOC111401959	0.425745	1.34327	0.0114975	XP_022885719.1	GATA transcription factor 5-like=Olea europaea var. sylvestris
LOC111381748	1.01454	2.02026	6.3051e-08	XP_022861425.1	GATA transcription factor 8-like=Olea europaea var. sylvestris
LOC111375523	0.51782	1.43179	0.000756927	XP_022854130.1	GATA transcription factor 8-like=Olea europaea var. sylvestris
LOC111397447	0.6774	1.59925	4.3397e-06	XP_022880159.1	growth-regulating factor 6-like=Olea europaea var. sylvestris
LOC111377859	1.07519	2.10701	0.00251951	XP_022856763.1	heat stress transcription factor A-2-like=Olea europaea var. sylvestris
LOC111393146	0.470522	1.38561	0.00295987	XP_022874316.1	heat stress transcription factor B-2a-like=Olea europaea var. sylvestris
LOC111368492	1.72276	3.30066	1.77992e-11	XP_022845525.1	heat stress transcription factor B-2b-like=Olea europaea var. sylvestris
LOC111374811	0.73559	1.66508	0.00496703	XP_022853315.1	heat stress transcription factor C-1-like=Olea europaea var. sylvestris
LOC111385994	1.59477	3.02045	3.64946e-05	XP_022866191.1	MADS-box protein defh21=Olea europaea var. sylvestris
LOC111386876	0.825716	1.77241	0.000339159	XP_022867128.1	MADS-box transcription factor 23-like=Olea europaea var. sylvestris
LOC111394664	1.05516	2.07795	0.000241975	XP_022876357.1	MADS-box transcription factor 27-like=Olea europaea var. sylvestris
LOC111384056	1.56281	2.95428	9.47138e-08	XP_022864041.1	MADS-box transcription factor ANR1-like=Olea europaea var. sylvestris
LOC111394663	1.17328	2.25524	2.98244e-06	XP_022876356.1	MADS-box transcription factor ANR1-like=Olea europaea var. sylvestris
LOC111402864	0.953562	1.93665	7.53898e-09	XP_022886934.1	myb family transcription factor PHL11=Olea europaea var. sylvestris
LOC111406193	1.0355	2.04983	1.45742e-06	XP_022891230.1	myb family transcription factor PHL8-like=Olea europaea var. sylvestris
LOC111372807	0.790993	1.73026	0.0081739	XP_022850977.1	NAC transcription factor 29-like=Olea europaea var. sylvestris
LOC111393458	2.00495	4.01375	1.4018e-09	XP_022874757.1	NAC transcription factor 56-like=Olea europaea var. sylvestris
LOC111399932	0.798981	1.73987	0.00158314	XP_022883184.1	nuclear transcription factor Y subunit A-10-like=Olea europaea var. sylvestris
LOC111403489	0.768394	1.70337	6.34458e-05	XP_022887783.1	nuclear transcription factor Y subunit A-1-like=Olea europaea var. sylvestris
LOC111405538	0.425446	1.34299	0.00339874	XP_022890244.1	nuclear transcription factor Y subunit A-9-like=Olea europaea var. sylvestris
LOC111407688	0.487867	1.40237	0.00983008	XP_022893090.1	nuclear transcription factor Y subunit B-10-like=Olea europaea var. sylvestris
LOC111395459	0.83701	1.78634	0.00286298	XP_022877230.1	probable transcription factor GLK1=Olea europaea var. sylvestris
LOC111367649	1.14447	2.21065	4.29893e-06	XP_022844403.1	probable WRKY transcription factor 13=Olea europaea var. sylvestris
LOC111409915	0.906014	1.87386	2.04549e-06	XP_022895793.1	probable WRKY transcription factor 30=Olea europaea var. sylvestris
LOC111405194	1.00295	2.0041	1.6813e-05	XP_022889738.1	probable WRKY transcription factor 40=Olea europaea var. sylvestris
LOC111373803	0.60824	1.5244	0.000214346	XP_022852134.1	probable WRKY transcription factor 57=Olea europaea var. sylvestris
LOC111374837	1.59037	3.01126	3.42134e-05	XP_022853346.1	protein Dr1 homolog=Olea europaea var. sylvestris
LOC111368897	0.686736	1.60964	0.00481094	XP_022846174.1	protein RICE SALT SENSITIVE 3-like=Olea europaea var. sylvestris
LOC111384077	0.464195	1.37955	0.0114606	XP_022864087.1	putative B3 domain-containing protein Os03g0621600=Olea europaea var. sylvestris
LOC111368834	0.469945	1.38506	0.000836377	XP_022846070.1	scarecrow-like protein 28=Olea europaea var. sylvestris
LOC111365450	0.625352	1.54259	0.000526571	XP_022841766.1	scarecrow-like protein 4=Olea europaea var. sylvestris
LOC111375947	1.08851	2.12654	0.0012766	XP_022854637.1	scarecrow-like protein 9=Olea europaea var. sylvestris
LOC111386018	0.417627	1.33573	0.00471934	XP_022866230.1	transcription factor ABA-INDUCIBLE bHLH-TYPE-like=Olea europaea var. sylvestris
LOC111377507	0.791272	1.7306	1.71236e-07	XP_022856387.1	transcription factor AS1=Olea europaea var. sylvestris
LOC111397206	0.854281	1.80786	0.00195248	XP_022879758.1	transcription factor bHLH121-like=Olea europaea var. sylvestris
LOC111379331	0.531812	1.44574	9.42182e-05	XP_022858455.1	transcription factor bHLH143-like=Olea europaea var. sylvestris
LOC111392113	0.974175	1.96452	1.00691e-05	XP_022873149.1	transcription factor bHLH148-like=Olea europaea var. sylvestris
LOC111409864	1.27504	2.42005	3.54512e-06	XP_022895713.1	transcription factor bHLH149-like=Olea europaea var. sylvestris
LOC111371413	0.851275	1.80409	0.00236348	XP_022849162.1	transcription factor bHLH154-like=Olea europaea var. sylvestris
LOC111380330	1.4977	2.82393	0.00671315	XP_022859626.1	transcription factor bHLH162-like=Olea europaea var. sylvestris
LOC111377810	0.978765	1.97078	4.01924e-08	XP_022856705.1	transcription factor bHLH162-like=Olea europaea var. sylvestris
LOC111403731	3.55904	11.7863	1.203e-34	XP_022888108.1	transcription factor bHLH18-like=Olea europaea var. sylvestris
LOC111401031	1.62177	3.07752	1.57857e-31	XP_022884333.1	transcription factor bHLH18-like=Olea europaea var. sylvestris
LOC111408970	0.934352	1.91103	9.48894e-07	XP_022894612.1	transcription factor bHLH18-like=Olea europaea var. sylvestris
LOC111368603	0.488492	1.40298	0.0051047	XP_022845716.1	transcription factor bHLH30-like=Olea europaea var. sylvestris
LOC111366313	0.940821	1.91962	4.04159e-09	XP_022842817.1	transcription factor bHLH35-like=Olea europaea var. sylvestris
LOC111365917	1.30133	2.46456	3.80794e-22	XP_022842243.1	transcription factor bHLH48-like=Olea europaea var. sylvestris
LOC111378013	1.21457	2.32071	1.19075e-06	XP_022856947.1	transcription factor bHLH48-like=Olea europaea var. sylvestris
LOC111395916	1.3546	2.55726	3.83573e-10	XP_022877909.1	transcription factor bHLH49-like=Olea europaea var. sylvestris
LOC111371296	0.903143	1.87014	9.05854e-12	XP_022848964.1	transcription factor bHLH62-like=Olea europaea var. sylvestris
LOC111373704	1.26979	2.41126	6.13313e-21	XP_022852049.1	transcription factor bHLH71-like=Olea europaea var. sylvestris
LOC111398785	0.995482	1.99375	8.89604e-12	XP_022881646.1	transcription factor bHLH71-like=Olea europaea var. sylvestris
LOC111396647	0.78002	1.71715	1.62119e-06	XP_022878848.1	transcription factor bHLH78-like=Olea europaea var. sylvestris
LOC111393769	0.46438	1.37972	0.0103059	XP_022875233.1	transcription factor bHLH78-like=Olea europaea var. sylvestris
LOC111401544	3.05586	8.31582	4.50164e-13	XP_022885099.1	transcription factor bHLH87-like=Olea europaea var. sylvestris
LOC111382832	2.26256	4.79841	2.26805e-26	XP_022862645.1	transcription factor bHLH93-like=Olea europaea var. sylvestris
LOC111391692	2.1745	4.51428	5.11485e-13	XP_022872709.1	transcription factor bHLH93-like=Olea europaea var. sylvestris
LOC111397236	0.65057	1.56979	0.000201761	XP_022879822.1	transcription factor bHLH93-like=Olea europaea var. sylvestris
LOC111408061	0.744152	1.67499	6.40783e-06	XP_022893594.1	transcription factor bHLH96-like=Olea europaea var. sylvestris
LOC111397040	0.404789	1.32389	0.0065675	XP_022879494.1	transcription factor BIM2-like=Olea europaea var. sylvestris
LOC111387943	0.508888	1.42295	0.00488826	XP_022868345.1	transcription factor BPE=Olea europaea var. sylvestris
LOC111365240	0.953981	1.93721	7.08818e-10	XP_022841426.1	transcription factor DIVARICATA-like=Olea europaea var. sylvestris
LOC111393971	0.627575	1.54497	0.000400936	XP_022875533.1	transcription factor GLABRA 3-like=Olea europaea var. sylvestris
LOC111377422	0.886899	1.8492	0.000401785	XP_022856283.1	transcription factor HEC2-like=Olea europaea var. sylvestris
LOC111403738	0.93808	1.91598	0.000824502	XP_022888115.1	transcription factor IBH1-like 1=Olea europaea var. sylvestris
LOC111366382	0.866179	1.82283	0.000700144	XP_022842930.1	transcription factor ICE1-like=Olea europaea var. sylvestris
LOC111409246	0.354361	1.27842	0.0118054	XP_022895027.1	transcription factor ICE1-like=Olea europaea var. sylvestris
LOC111380508	1.82349	3.53937	2.41406e-10	XP_022859858.1	transcription factor MYB14-like=Olea europaea var. sylvestris
LOC111384481	0.792621	1.73222	1.45335e-06	XP_022864525.1	transcription factor MYB1R1-like=Olea europaea var. sylvestris
LOC111386247	0.759382	1.69276	1.68082e-05	XP_022866471.1	transcription factor MYB20-like=Olea europaea var. sylvestris
LOC111366508	0.83904	1.78886	0.000114477	XP_022843018.1	transcription factor MYB26-like=Olea europaea var. sylvestris
LOC111386061	0.79117	1.73048	0.00560487	XP_022866254.1	transcription factor MYB35-like=Olea europaea var. sylvestris
LOC111374859	0.913615	1.88376	6.31531e-05	XP_022853377.1	transcription factor MYB3R-1-like=Olea europaea var. sylvestris
LOC111389809	0.864148	1.82026	2.05759e-05	XP_022870557.1	transcription factor MYB52-like=Olea europaea var. sylvestris
LOC111401704	0.386467	1.30719	0.0108531	XP_022885330.1	transcription factor MYB61-like=Olea europaea var. sylvestris
LOC111386527	1.70513	3.26059	6.62915e-10	XP_022866756.1	transcription factor MYB83-like=Olea europaea var. sylvestris
LOC111411677	1.28667	2.43965	0.000387628	XP_022897998.1	transcription factor MYB83-like=Olea europaea var. sylvestris
LOC111407653	0.613229	1.52968	0.00249195	XP_022893036.1	transcription factor MYB8-like=Olea europaea var. sylvestris
LOC111413006	0.868678	1.82599	0.000509816	XP_022899655.1	transcription factor MYBC1-like=Olea europaea var. sylvestris
LOC111391178	0.775205	1.71143	0.000356038	XP_022872101.1	transcription factor MYBC1-like=Olea europaea var. sylvestris
LOC111369120	0.491479	1.40589	0.00624939	XP_022846382.1	transcription factor MYBC1-like=Olea europaea var. sylvestris
LOC111396393	0.411397	1.32997	0.00508817	XP_022878599.1	transcription factor MYC4-like=Olea europaea var. sylvestris
LOC111382833	1.25761	2.391	0.000151544	XP_022862646.1	transcription factor NAI1-like=Olea europaea var. sylvestris
LOC111397196	1.21223	2.31695	4.3147e-07	XP_022879748.1	transcription factor RF2b-like=Olea europaea var. sylvestris
LOC111380262	1.63278	3.1011	3.54597e-16	XP_022859544.1	transcription factor SCREAM2-like=Olea europaea var. sylvestris
LOC111401009	0.743451	1.67418	0.00336361	XP_022884305.1	transcription factor SPATULA-like=Olea europaea var. sylvestris
LOC111398410	0.881365	1.84212	0.00565982	XP_022881086.1	transcription factor SRM1-like=Olea europaea var. sylvestris
LOC111380693	0.646099	1.56493	0.000653757	XP_022860094.1	transcription factor TCP13-like=Olea europaea var. sylvestris
LOC111386571	0.643949	1.5626	5.25131e-05	XP_022866802.1	transcription factor TCP2-like=Olea europaea var. sylvestris
LOC111402231	0.551654	1.46577	0.0018212	XP_022886163.1	transcription factor TCP2-like=Olea europaea var. sylvestris
LOC111368886	1.07972	2.11362	1.01772e-05	XP_022846144.1	transcription factor TCP4-like=Olea europaea var. sylvestris
LOC111402545	0.643572	1.56219	1.22037e-05	XP_022886694.1	transcription factor TCP4-like=Olea europaea var. sylvestris
LOC111391585	0.635587	1.55357	0.000913724	XP_022872601.1	transcription factor TCP4-like=Olea europaea var. sylvestris
LOC111365350	0.739827	1.66998	0.0011841	XP_022841600.1	transcription factor TCP7-like=Olea europaea var. sylvestris
LOC111388074	0.679525	1.60161	0.00536002	XP_022868504.1	transcription factor TCP7-like=Olea europaea var. sylvestris
LOC111401754	0.620453	1.53736	0.000311849	XP_022885405.1	transcription factor TCP7-like=Olea europaea var. sylvestris
LOC111411782	0.73726	1.66701	9.72693e-07	XP_022898148.1	transcription factor TCP8-like=Olea europaea var. sylvestris
LOC111394783	0.723805	1.65153	0.00168236	XP_022876534.1	transcription factor TCP8-like=Olea europaea var. sylvestris
LOC111387403	0.486564	1.4011	0.000972587	XP_022867725.1	transcription factor TCP8-like=Olea europaea var. sylvestris
LOC111411535	0.842414	1.79305	6.25906e-05	XP_022897847.1	transcription factor UNE12-like=Olea europaea var. sylvestris
LOC111408750	0.789223	1.72814	1.34114e-05	XP_022894282.1	trihelix transcription factor GT-2-like=Olea europaea var. sylvestris
LOC111372220	0.726619	1.65476	9.33746e-05	XP_022850213.1	trihelix transcription factor GT-2-like=Olea europaea var. sylvestris
LOC111376152	0.485664	1.40023	0.000375735	XP_022854864.1	trihelix transcription factor GT-2-like=Olea europaea var. sylvestris
LOC111383678	0.862605	1.81832	2.63456e-09	XP_022863579.1	trihelix transcription factor GTL2=Olea europaea var. sylvestris
LOC111412780	1.45103	2.73403	1.77867e-05	XP_022899457.1	trihelix transcription factor PTL-like=Olea europaea var. sylvestris
LOC111370737	0.625108	1.54233	0.00296455	XP_022848358.1	trihelix transcription factor PTL-like=Olea europaea var. sylvestris

## Sheet: P28 vs.P14_DOWN
P28 vs. P14_DOWN
Genes	log2FoldChange	FoldChange	p value	Gene_ID	Description
LOC111383610	-0.469774	-1.38489	0.00932566	XP_022863495.1	ABSCISIC ACID-INSENSITIVE 5-like protein 4=Olea europaea var. sylvestris
LOC111381185	-1.03706	-2.05205	1.26989e-12	XP_022860701.1	ABSCISIC ACID-INSENSITIVE 5-like protein 7=Olea europaea var. sylvestris
LOC111373124	-3.20257	-9.20596	1.30494e-62	XP_022851375.1	AP2/ERF and B3 domain-containing transcription factor At1g51120-like=Olea europaea var. sylvestris
LOC111399031	-4.69018	-25.8158	9.62541e-28	XP_022881998.1	AP2/ERF and B3 domain-containing transcription factor RAV1=Olea europaea var. sylvestris
LOC111379352	-2.30775	-4.95112	3.7201e-29	XP_022858478.1	AP2/ERF and B3 domain-containing transcription factor RAV1-like=Olea europaea var. sylvestris
LOC111374630	-0.732859	-1.66193	0.00380599	XP_022853103.1	AP2-like ethylene-responsive transcription factor AIL5=Olea europaea var. sylvestris
LOC111384308	-0.712382	-1.63851	8.45956e-08	XP_022864341.1	AP2-like ethylene-responsive transcription factor ANT=Olea europaea var. sylvestris
LOC111366637	-0.799778	-1.74083	0.00280762	XP_022843119.1	AP2-like ethylene-responsive transcription factor BBM2=Olea europaea var. sylvestris
LOC111376876	-2.00642	-4.01783	8.51508e-07	XP_022855920.1	AP2-like ethylene-responsive transcription factor TOE3=Olea europaea var. sylvestris
LOC111401005	-0.630687	-1.5483	1.03505e-05	XP_022884297.1	AP2-like ethylene-responsive transcription factor TOE3=Olea europaea var. sylvestris
LOC111369403	-0.849706	-1.80213	5.82502e-08	XP_022846671.1	auxin response factor 18-like=Olea europaea var. sylvestris
LOC111372818	-0.498085	-1.41234	0.000181694	XP_022850995.1	auxin response factor 18-like=Olea europaea var. sylvestris
LOC111404210	-1.47326	-2.77649	2.70154e-19	XP_022888756.1	auxin response factor 19-like=Olea europaea var. sylvestris
LOC111366891	-1.22801	-2.34243	1.32814e-12	XP_022843346.1	auxin response factor 19-like=Olea europaea var. sylvestris
LOC111399798	-1.18893	-2.27984	8.00715e-10	XP_022883057.1	auxin response factor 19-like=Olea europaea var. sylvestris
LOC111366099	-0.868736	-1.82606	2.48471e-08	XP_022842521.1	auxin response factor 19-like=Olea europaea var. sylvestris
LOC111369829	-0.65326	-1.57272	0.0103634	XP_022847289.1	auxin response factor 19-like=Olea europaea var. sylvestris
LOC111406439	-0.54212	-1.45611	0.00420225	XP_022891632.1	auxin response factor 2A-like=Olea europaea var. sylvestris
LOC111407245	-0.769045	-1.70414	5.30038e-07	XP_022892388.1	auxin response factor 3-like=Olea europaea var. sylvestris
LOC111408863	-1.83375	-3.56461	6.57637e-06	XP_022894443.1	auxin response factor 5-like=Olea europaea var. sylvestris
LOC111380232	-0.694426	-1.61824	0.000380007	XP_022859505.1	auxin response factor 5-like=Olea europaea var. sylvestris
LOC111412249	-0.366788	-1.28948	0.00877412	XP_022898867.1	auxin response factor 6=Olea europaea var. sylvestris
LOC111403974	-3.6759	-12.7808	4.55011e-16	XP_022888439.1	B3 domain-containing protein At2g36080-like=Olea europaea var. sylvestris
LOC111366270	-3.34014	-10.127	4.05522e-27	XP_022842765.1	B3 domain-containing protein At2g36080-like=Olea europaea var. sylvestris
LOC111399617	-2.4247	-5.36917	6.83594e-24	XP_022882797.1	B3 domain-containing protein At2g36080-like=Olea europaea var. sylvestris
LOC111380810	-1.04853	-2.06842	0.0023794	XP_022860233.1	B3 domain-containing protein REM16-like=Olea europaea var. sylvestris
LOC111367898	-4.30692	-19.793	1.43645e-19	XP_022844772.1	basic leucine zipper 43-like=Olea europaea var. sylvestris
LOC111397687	-1.43077	-2.6959	2.12094e-05	XP_022880454.1	basic leucine zipper 43-like=Olea europaea var. sylvestris
LOC111394582	-0.597081	-1.51265	0.000497491	XP_022876240.1	bZIP transcription factor 44-like=Olea europaea var. sylvestris
LOC111408794	-2.64284	-6.24561	9.98836e-72	XP_022894334.1	bZIP transcription factor 46-like=Olea europaea var. sylvestris
LOC111401347	-1.85607	-3.62019	2.04016e-32	XP_022884813.1	bZIP transcription factor 46-like=Olea europaea var. sylvestris
LOC111397280	-1.44764	-2.72762	6.53879e-18	XP_022879888.1	bZIP transcription factor 46-like=Olea europaea var. sylvestris
LOC111392864	-0.515521	-1.42951	0.00236727	XP_022874030.1	bZIP transcription factor 60-like=Olea europaea var. sylvestris
LOC111387409	-0.447095	-1.36329	0.00573481	XP_022867730.1	bZIP transcription factor 60-like=Olea europaea var. sylvestris
LOC111381229	-0.713546	-1.63983	0.0119688	XP_022860754.1	bZIP transcription factor 68-like=Olea europaea var. sylvestris
LOC111388199	-0.795225	-1.73535	4.80445e-06	XP_022868653.1	ethylene-responsive transcription factor 1-like=Olea europaea var. sylvestris
LOC111405546	-0.389534	-1.30997	0.00833829	XP_022890259.1	ethylene-responsive transcription factor 2-like=Olea europaea var. sylvestris
LOC111395465	-1.10758	-2.15484	2.73733e-10	XP_022877236.1	ethylene-responsive transcription factor 4-like=Olea europaea var. sylvestris
LOC111379518	-0.998936	-1.99853	2.65567e-10	XP_022858676.1	ethylene-responsive transcription factor 4-like=Olea europaea var. sylvestris
LOC111381486	-0.615108	-1.53167	0.00288395	XP_022861038.1	ethylene-responsive transcription factor 4-like=Olea europaea var. sylvestris
LOC111391878	-1.09039	-2.12931	3.69683e-12	XP_022872923.1	ethylene-responsive transcription factor 5-like=Olea europaea var. sylvestris
LOC111405547	-0.553405	-1.46755	0.000556053	XP_022890260.1	ethylene-responsive transcription factor 5-like=Olea europaea var. sylvestris
LOC111409375	-2.81572	-7.04069	1.20662e-11	XP_022895197.1	ethylene-responsive transcription factor ABR1-like=Olea europaea var. sylvestris
LOC111372227	-1.30767	-2.47541	2.28178e-07	XP_022850227.1	ethylene-responsive transcription factor ABR1-like=Olea europaea var. sylvestris
LOC111401352	-3.84296	-14.3498	3.24448e-26	XP_022884823.1	ethylene-responsive transcription factor ERF011-like=Olea europaea var. sylvestris
LOC111368831	-1.8181	-3.52615	1.05669e-05	XP_022846068.1	ethylene-responsive transcription factor ERF027-like=Olea europaea var. sylvestris
LOC111376163	-2.0103	-4.02865	5.04827e-06	XP_022854872.1	ethylene-responsive transcription factor ERF095-like=Olea europaea var. sylvestris
LOC111386756	-0.676896	-1.5987	0.0112817	XP_022866990.1	ethylene-responsive transcription factor ERF104-like=Olea europaea var. sylvestris
LOC111367121	-1.6822	-3.20918	3.81995e-10	XP_022843617.1	ethylene-responsive transcription factor ERF107-like=Olea europaea var. sylvestris
LOC111391077	-4.43059	-21.5646	5.1753e-13	XP_022871987.1	ethylene-responsive transcription factor ERF110-like= Olea europaea var. sylvestris
LOC111381215	-2.03657	-4.10269	1.09365e-41	XP_022860734.1	ethylene-responsive transcription factor ERF113-like=Olea europaea var. sylvestris
LOC111396122	-1.69308	-3.23345	1.22857e-05	XP_022878201.1	ethylene-responsive transcription factor ERF113-like=Olea europaea var. sylvestris
LOC111408106	-1.14629	-2.21345	0.000356696	XP_022893661.1	ethylene-responsive transcription factor ERF116-like=Olea europaea var. sylvestris
LOC111403203	-3.76372	-13.5829	4.55136e-15	XP_022887380.1	ethylene-responsive transcription factor ERF118-like=Olea europaea var. sylvestris
LOC111403199	-0.935222	-1.91218	0.000199857	XP_022887377.1	ethylene-responsive transcription factor ERF118-like=Olea europaea var. sylvestris
LOC111387814	-0.70829	-1.63387	0.000132389	XP_022868171.1	ethylene-responsive transcription factor ERF118-like=Olea europaea var. sylvestris
LOC111384776	-0.453893	-1.36973	0.00952024	XP_022864867.1	ethylene-responsive transcription factor ERF118-like=Olea europaea var. sylvestris
LOC111367521	-0.848212	-1.80027	7.57433e-05	XP_022844217.1	ethylene-responsive transcription factor RAP2-13-like=Olea europaea var. sylvestris
LOC111366136	-1.31193	-2.48273	1.96617e-06	XP_022842585.1	ethylene-responsive transcription factor TINY-like=Olea europaea var. sylvestris
LOC111393409	-0.516844	-1.43082	0.00624274	XP_022874700.1	ethylene-responsive transcription factor-like protein At4g13040=Olea europaea var. sylvestris
LOC111409443	-0.790832	-1.73007	0.000467655	XP_022895265.1	growth-regulating factor 1-like=Olea europaea var. sylvestris
LOC111387331	-0.508903	-1.42297	0.00233819	XP_022867653.1	growth-regulating factor 4-like=Olea europaea var. sylvestris
LOC111406149	-0.522348	-1.43629	0.0105409	XP_022891145.1	growth-regulating factor 7-like=Olea europaea var. sylvestris
LOC111383844	-1.17747	-2.2618	0.00115485	XP_022863784.1	heat stress transcription factor A-3-like=Olea europaea var. sylvestris
LOC111395511	-1.23177	-2.34854	2.47357e-08	XP_022877298.1	heat stress transcription factor A-4b-like=Olea europaea var. sylvestris
LOC111405590	-0.614435	-1.53096	0.00684152	XP_022890308.1	heat stress transcription factor B-2a-like=Olea europaea var. sylvestris
LOC111403872	-1.37947	-2.60172	1.74841e-05	XP_022888274.1	heat stress transcription factor B-3-like=Olea europaea var. sylvestris
LOC111397258	-0.753337	-1.68569	0.00252211	XP_022879858.1	heat stress transcription factor C-1-like=Olea europaea var. sylvestris
LOC111377484	-0.4822	-1.39687	0.000653759	XP_022856358.1	light-inducible protein CPRF2-like=Olea europaea var. sylvestris
LOC111378339	-3.19099	-9.1324	8.43284e-37	XP_022857290.1	MADS-box protein 04g005320-like=Olea europaea var. sylvestris
LOC111393013	-5.42175	-42.8657	1.93841e-13	XP_022874213.1	MADS-box protein AGL42-like= Olea europaea var. sylvestris
LOC111382532	-2.971	-7.84077	7.07595e-12	XP_022862308.1	MADS-box protein AGL42-like=Olea europaea var. sylvestris
LOC111367567	-5.25497	-38.186	1.80355e-14	XP_022844323.1	MADS-box protein JOINTLESS-like=Olea europaea var. sylvestris
LOC111397047	-5.71345	-52.471	3.13185e-20	XP_022879532.1	MADS-box protein SOC1-like = Olea europaea var. sylvestris
LOC111391554	-0.956336	-1.94038	0.000177901	XP_022872561.1	MADS-box transcription factor 6=Olea europaea var. sylvestris
LOC111398838	-0.940305	-1.91893	0.00372216	XP_022881723.1	MADS-box transcription factor 7-like=Olea europaea var. sylvestris
LOC111382258	-1.39017	-2.6211	1.4821e-06	XP_022861943.1	myb family transcription factor APL-like=Olea europaea var. sylvestris
LOC111395869	-1.31091	-2.48098	2.76635e-07	XP_022877839.1	myb family transcription factor APL-like=Olea europaea var. sylvestris
LOC111366383	-2.29958	-4.92315	1.74368e-10	XP_022842928.1	myb family transcription factor EFM-like=Olea europaea var. sylvestris
LOC111407680	-0.66881	-1.58976	3.1755e-06	XP_022893080.1	myb family transcription factor PHL13-like=Olea europaea var. sylvestris
LOC111396900	-0.432685	-1.34974	0.00734801	XP_022879268.1	myb family transcription factor PHL7-like=Olea europaea var. sylvestris
LOC111407126	-5.22163	-37.3135	4.94721e-95	XP_022892207.1	NAC domain-containing protein 21/22-like =Olea europaea var. sylvestris
LOC111396190	-5.42166	-42.8629	9.8196e-44	XP_022878302.1	NAC transcription factor 29-like= Olea europaea var. sylvestris
LOC111406159	-5.12794	-34.9675	8.89606e-50	XP_022891165.1	NAC transcription factor 29-like=Olea europaea var. sylvestris
LOC111398904	-3.90288	-14.9584	0.00131018	XP_022881834.1	NAC transcription factor 29-like=Olea europaea var. sylvestris
LOC111402364	-0.967027	-1.95481	7.29526e-09	XP_022886370.1	NAC transcription factor 32-like=Olea europaea var. sylvestris
LOC111389453	-4.59775	-24.2137	4.38568e-28	XP_022870138.1	NAC transcription factor 56-like= Olea europaea var. sylvestris
LOC111402519	-0.69426	-1.61805	0.0115534	XP_022886657.1	NAC transcription factor 56-like=Olea europaea var. sylvestris
LOC111411684	-0.596848	-1.51241	0.000153704	XP_022898002.1	nuclear transcription factor Y subunit A-4-like=Olea europaea var. sylvestris
LOC111398747	-1.46032	-2.7517	2.63201e-13	XP_022881588.1	nuclear transcription factor Y subunit A-6-like=Olea europaea var. sylvestris
LOC111366350	-1.16958	-2.24947	0.00239143	XP_022842872.1	nuclear transcription factor Y subunit A-7-like=Olea europaea var. sylvestris
LOC111376852	-0.458912	-1.3745	0.00508449	XP_022855621.1	nuclear transcription factor Y subunit B-3-like=Olea europaea var. sylvestris
LOC111368569	-0.447691	-1.36386	0.0066909	XP_022845654.1	nuclear transcription factor Y subunit C-2-like=Olea europaea var. sylvestris
LOC111384363	-0.616846	-1.53352	6.00386e-05	XP_022864406.1	probable transcription factor PosF21=Olea europaea var. sylvestris
LOC111378210	-1.72617	-3.30848	1.02022e-36	XP_022857146.1	probable WRKY transcription factor 11=Olea europaea var. sylvestris
LOC111387344	-3.15946	-8.93496	4.04202e-19	XP_022867670.1	probable WRKY transcription factor 12=Olea europaea var. sylvestris
LOC111408668	-1.6574	-3.15448	5.05281e-05	XP_022894170.1	probable WRKY transcription factor 13=Olea europaea var. sylvestris
LOC111370459	-4.23338	-18.8094	5.80829e-20	XP_022847942.1	probable WRKY transcription factor 14=Olea europaea var. sylvestris
LOC111396663	-0.747344	-1.6787	7.40914e-06	XP_022878880.1	probable WRKY transcription factor 17=Olea europaea var. sylvestris
LOC111392291	-1.48449	-2.79818	4.35053e-08	XP_022873371.1	probable WRKY transcription factor 2=Olea europaea var. sylvestris
LOC111407137	-1.17928	-2.26463	9.11384e-10	XP_022892225.1	probable WRKY transcription factor 2=Olea europaea var. sylvestris
LOC111370917	-0.789336	-1.72828	0.00190699	XP_022848588.1	probable WRKY transcription factor 2=Olea europaea var. sylvestris
LOC111379764	-3.22006	-9.31824	1.34804e-15	XP_022858972.1	probable WRKY transcription factor 20=Olea europaea var. sylvestris
LOC111391535	-0.550997	-1.4651	0.00262461	XP_022872541.1	probable WRKY transcription factor 20=Olea europaea var. sylvestris
LOC111403586	-0.671842	-1.59311	0.0106752	XP_022887922.1	probable WRKY transcription factor 21=Olea europaea var. sylvestris
LOC111403584	-0.62328	-1.54037	0.0122647	XP_022887920.1	probable WRKY transcription factor 21=Olea europaea var. sylvestris
LOC111394710	-1.81888	-3.52806	6.16696e-26	XP_022876423.1	probable WRKY transcription factor 23=Olea europaea var. sylvestris
LOC111407693	-1.45102	-2.734	0.00321359	XP_022893099.1	probable WRKY transcription factor 23=Olea europaea var. sylvestris
LOC111388449	-1.26234	-2.39885	0.000742623	XP_022868921.1	probable WRKY transcription factor 23=Olea europaea var. sylvestris
LOC111383526	-2.8804	-7.36353	6.36547e-65	XP_022863407.1	probable WRKY transcription factor 26=Olea europaea var. sylvestris
LOC111371256	-1.89108	-3.70913	5.9457e-35	XP_022848910.1	probable WRKY transcription factor 26=Olea europaea var. sylvestris
LOC111372036	-4.16334	-17.9181	2.14343e-22	XP_022849953.1	probable WRKY transcription factor 28=Olea europaea var. sylvestris
LOC111403319	-1.22828	-2.34288	2.33778e-06	XP_022887540.1	probable WRKY transcription factor 3=Olea europaea var. sylvestris
LOC111380185	-3.59702	-12.1007	8.32814e-25	XP_022859444.1	probable WRKY transcription factor 30=Olea europaea var. sylvestris
LOC111389584	-2.02461	-4.06882	1.82732e-29	XP_022870279.1	probable WRKY transcription factor 31=Olea europaea var. sylvestris
LOC111405948	-2.32421	-5.0079	3.64711e-09	XP_022890848.1	probable WRKY transcription factor 33=Olea europaea var. sylvestris
LOC111399313	-1.77847	-3.43061	1.54866e-10	XP_022882328.1	probable WRKY transcription factor 33=Olea europaea var. sylvestris
LOC111407314	-5.89487	-59.5022	1.52349e-13	XP_022892495.1	probable WRKY transcription factor 35= Olea europaea var. sylvestris
LOC111400902	-0.52702	-1.44095	0.00165407	XP_022884128.1	probable WRKY transcription factor 4=Olea europaea var. sylvestris
LOC111401906	-1.93514	-3.82416	6.62877e-14	XP_022885650.1	probable WRKY transcription factor 40=Olea europaea var. sylvestris
LOC111381755	-1.40243	-2.64347	1.07709e-05	XP_022861334.1	probable WRKY transcription factor 40=Olea europaea var. sylvestris
LOC111386053	-0.917073	-1.88828	0.00093977	XP_022866251.1	probable WRKY transcription factor 41=Olea europaea var. sylvestris
LOC111411943	-1.37971	-2.60216	1.41278e-15	XP_022898404.1	probable WRKY transcription factor 46=Olea europaea var. sylvestris
LOC111376693	-3.1205	-8.69687	9.86297e-25	XP_022855431.1	probable WRKY transcription factor 48=Olea europaea var. sylvestris
LOC111403024	-2.54311	-5.82843	2.40112e-69	XP_022887137.1	probable WRKY transcription factor 53=Olea europaea var. sylvestris
LOC111379198	-1.11305	-2.16303	6.67241e-10	XP_022858312.1	probable WRKY transcription factor 53=Olea europaea var. sylvestris
LOC111381082	-1.00605	-2.0084	2.48286e-08	XP_022860568.1	probable WRKY transcription factor 53=Olea europaea var. sylvestris
LOC111402874	-0.934665	-1.91145	0.000324805	XP_022886946.1	probable WRKY transcription factor 53=Olea europaea var. sylvestris
LOC111394685	-0.713978	-1.64032	3.69384e-05	XP_022876396.1	probable WRKY transcription factor 69=Olea europaea var. sylvestris
LOC111367203	-1.49137	-2.81157	1.33332e-12	XP_022843726.1	probable WRKY transcription factor 7=Olea europaea var. sylvestris
LOC111387868	-0.587949	-1.50311	0.00111474	XP_022868232.1	probable WRKY transcription factor 7=Olea europaea var. sylvestris
LOC111374780	-2.75505	-6.75074	1.64964e-35	XP_022853284.1	probable WRKY transcription factor 70=Olea europaea var. sylvestris
LOC111392938	-1.91208	-3.76352	4.12261e-42	XP_022874117.1	probable WRKY transcription factor 70=Olea europaea var. sylvestris
LOC111405523	-1.44848	-2.7292	0.000222997	XP_022890220.1	probable WRKY transcription factor 70=Olea europaea var. sylvestris
LOC111397122	-5.01384	-32.3084	1.97249e-53	XP_022879638.1	probable WRKY transcription factor 71=Olea europaea var. sylvestris
LOC111407238	-3.91222	-15.0555	5.27271e-23	XP_022892370.1	probable WRKY transcription factor 71=Olea europaea var. sylvestris
LOC111375927	-2.26185	-4.79606	9.42545e-05	XP_022854620.1	probable WRKY transcription factor 75=Olea europaea var. sylvestris
LOC111397482	-2.13032	-4.37814	1.84703e-05	XP_022880201.1	probable WRKY transcription factor 75=Olea europaea var. sylvestris
LOC111396152	-2.10274	-4.29523	7.33848e-07	XP_022878240.1	probable WRKY transcription factor 75=Olea europaea var. sylvestris
LOC111370802	-1.09873	-2.14166	7.3592e-11	XP_022848444.1	protein RICE SALT SENSITIVE 3-like=Olea europaea var. sylvestris
LOC111398511	-1.91152	-3.76206	1.89549e-12	XP_022881217.1	protein SCARECROW-like=Olea europaea var. sylvestris
LOC111378915	-0.804504	-1.74654	1.44269e-06	XP_022857960.1	protein SHORT-ROOT-like=Olea europaea var. sylvestris
LOC111396796	-0.736734	-1.6664	6.44923e-07	XP_022879084.1	scarecrow-like protein 1=Olea europaea var. sylvestris
LOC111408732	-0.589869	-1.50511	1.03631e-05	XP_022894259.1	scarecrow-like protein 1=Olea europaea var. sylvestris
LOC111406004	-0.669315	-1.59032	0.000135298	XP_022890935.1	scarecrow-like protein 14=Olea europaea var. sylvestris
LOC111407544	-0.410513	-1.32916	0.00229879	XP_022892874.1	scarecrow-like protein 14=Olea europaea var. sylvestris
LOC111379178	-2.12749	-4.36957	3.85987e-21	XP_022858287.1	scarecrow-like protein 15=Olea europaea var. sylvestris
LOC111389861	-0.495138	-1.40946	0.0108679	XP_022870605.1	scarecrow-like protein 15=Olea europaea var. sylvestris
LOC111395674	-0.48973	-1.40418	0.00124431	XP_022877549.1	scarecrow-like protein 21=Olea europaea var. sylvestris
LOC111373799	-0.540585	-1.45456	0.000973136	XP_022852131.1	scarecrow-like protein 22=Olea europaea var. sylvestris
LOC111387241	-0.677697	-1.59958	0.00451169	XP_022867562.1	scarecrow-like protein 27=Olea europaea var. sylvestris
LOC111381245	-2.00353	-4.00979	7.6972e-07	XP_022860768.1	scarecrow-like protein 3=Olea europaea var. sylvestris
LOC111411897	-1.80324	-3.49003	1.58331e-14	XP_022898321.1	scarecrow-like protein 3=Olea europaea var. sylvestris
LOC111369670	-0.894883	-1.85946	2.99016e-08	XP_022847042.1	scarecrow-like protein 30=Olea europaea var. sylvestris
LOC111369660	-0.930676	-1.90617	3.30135e-10	XP_022847027.1	scarecrow-like protein 33=Olea europaea var. sylvestris
LOC111409888	-0.847478	-1.79935	0.00171284	XP_022895752.1	scarecrow-like protein 6=Olea europaea var. sylvestris
LOC111410841	-0.746919	-1.6782	0.00189192	XP_022897183.1	scarecrow-like protein 6=Olea europaea var. sylvestris
LOC111393263	-1.29879	-2.46023	3.82049e-13	XP_022874491.1	scarecrow-like protein 8=Olea europaea var. sylvestris
LOC111385606	-1.43867	-2.71071	6.63942e-06	XP_022865781.1	scarecrow-like protein 9=Olea europaea var. sylvestris
LOC111385124	-0.739125	-1.66916	0.00199457	XP_022865268.1	scarecrow-like protein 9=Olea europaea var. sylvestris
LOC111412051	-1.28455	-2.43605	3.49463e-15	XP_022898562.1	scarecrow-like transcription factor PAT1=Olea europaea var. sylvestris
LOC111401071	-2.36391	-5.14762	1.88138e-25	XP_022884381.1	scarecrow-like_protein_15=Olea europaea var. sylvestris
LOC111365890	-0.976002	-1.96701	1.67599e-09	XP_022842187.1	TGACG-sequence-specific DNA-binding protein TGA-2.1-like=Olea europaea var. sylvestris
LOC111384917	-1.2415	-2.36445	0.000735233	XP_022865031.1	transcription factor ABA-INDUCIBLE bHLH-TYPE-like=Olea europaea var. sylvestris
LOC111385988	-0.550449	-1.46454	0.000166977	XP_022866179.1	transcription factor BHLH089-like=Olea europaea var. sylvestris
LOC111373997	-0.829838	-1.77749	2.21691e-05	XP_022852366.1	transcription factor bHLH106-like=Olea europaea var. sylvestris
LOC111379495	-0.850961	-1.8037	0.000820147	XP_022858643.1	transcription factor bHLH110-like=Olea europaea var. sylvestris
LOC111402312	-2.52885	-5.7711	2.28805e-10	XP_022886300.1	transcription factor bHLH112-like=Olea europaea var. sylvestris
LOC111368534	-0.832427	-1.78068	0.0120081	XP_022845586.1	transcription factor bHLH112-like=Olea europaea var. sylvestris
LOC111389357	-1.1659	-2.24372	3.46194e-09	XP_022870049.1	transcription factor bHLH115-like=Olea europaea var. sylvestris
LOC111410100	-0.614923	-1.53148	0.000453922	XP_022896065.1	transcription factor bHLH121-like=Olea europaea var. sylvestris
LOC111380179	-0.607197	-1.5233	0.000179194	XP_022859439.1	transcription factor bHLH122-like=Olea europaea var. sylvestris
LOC111377644	-2.22758	-4.68348	2.62289e-07	XP_022856537.1	transcription factor bHLH123-like=Olea europaea var. sylvestris
LOC111397429	-1.8098	-3.50594	1.82082e-05	XP_022880119.1	transcription factor bHLH123-like=Olea europaea var. sylvestris
LOC111386608	-2.76626	-6.80342	2.04063e-15	XP_022866848.1	transcription factor bHLH130-like=Olea europaea var. sylvestris
LOC111410128	-2.45036	-5.46553	1.99216e-11	XP_022896111.1	transcription factor bHLH130-like=Olea europaea var. sylvestris
LOC111396785	-1.51132	-2.85071	8.06392e-05	XP_022879067.1	transcription factor bHLH130-like=Olea europaea var. sylvestris
LOC111405327	-3.04426	-8.24924	5.85121e-23	XP_022889922.1	transcription factor bHLH137-like=Olea europaea var. sylvestris
LOC111368046	-2.88422	-7.38308	1.97387e-13	XP_022844984.1	transcription factor bHLH137-like=Olea europaea var. sylvestris
LOC111371702	-1.19518	-2.28974	1.41779e-08	XP_022849627.1	transcription factor bHLH137-like=Olea europaea var. sylvestris
LOC111411950	-2.48531	-5.59956	9.85023e-20	XP_022898412.1	transcription factor bHLH13-like=Olea europaea var. sylvestris
LOC111411949	-2.33136	-5.0328	5.7465e-21	XP_022898411.1	transcription factor bHLH13-like=Olea europaea var. sylvestris
LOC111397118	-0.983656	-1.97747	4.85564e-12	XP_022879633.1	transcription factor bHLH144-like=Olea europaea var. sylvestris
LOC111407244	-0.49513	-1.40945	0.000117223	XP_022892382.1	transcription factor bHLH144-like=Olea europaea var. sylvestris
LOC111384934	-2.43792	-5.41859	4.03648e-15	XP_022865052.1	transcription factor bHLH149-like=Olea europaea var. sylvestris
LOC111409989	-1.15664	-2.22937	0.00204796	XP_022895900.1	transcription factor bHLH149-like=Olea europaea var. sylvestris
LOC111403479	-0.891517	-1.85513	1.44911e-05	XP_022887773.1	transcription factor bHLH153-like=Olea europaea var. sylvestris
LOC111382706	-2.84423	-7.18121	7.23358e-11	XP_022862513.1	transcription factor bHLH162-like=Olea europaea var. sylvestris
LOC111377804	-2.75235	-6.73812	5.3507e-20	XP_022856700.1	transcription factor bHLH162-like=Olea europaea var. sylvestris
LOC111377802	-1.10852	-2.15624	1.73556e-05	XP_022856699.1	transcription factor bHLH162-like=Olea europaea var. sylvestris
LOC111391691	-0.57872	-1.49352	0.000755933	XP_022872708.1	transcription factor bHLH18-like=Olea europaea var. sylvestris
LOC111407256	-1.17713	-2.26127	9.75961e-06	XP_022892405.1	transcription factor bHLH30-like=Olea europaea var. sylvestris
LOC111391416	-0.568143	-1.48261	4.59191e-05	XP_022872401.1	transcription factor bHLH3-like=Olea europaea var. sylvestris
LOC111403032	-2.2679	-4.81623	3.89536e-30	XP_022887145.1	transcription factor bHLH51-like=Olea europaea var. sylvestris
LOC111380296	-3.04621	-8.26042	8.5171e-12	XP_022859590.1	transcription factor bHLH61-like=Olea europaea var. sylvestris
LOC111403762	-0.653862	-1.57337	3.24634e-06	XP_022888150.1	transcription factor bHLH66-like=Olea europaea var. sylvestris
LOC111367830	-1.30426	-2.46957	0.000218888	XP_022844662.1	transcription factor bHLH68-like=Olea europaea var. sylvestris
LOC111366881	-1.15532	-2.22733	0.000308575	XP_022843335.1	transcription factor bHLH68-like=Olea europaea var. sylvestris
LOC111367155	-1.01417	-2.01974	1.74087e-08	XP_022843657.1	transcription factor bHLH68-like=Olea europaea var. sylvestris
LOC111377192	-0.988415	-1.984	6.55952e-09	XP_022856023.1	transcription factor bHLH68-like=Olea europaea var. sylvestris
LOC111405134	-0.98388	-1.97778	0.00243086	XP_022889656.1	transcription factor bHLH68-like=Olea europaea var. sylvestris
LOC111371771	-0.403175	-1.32241	0.0115944	XP_022849690.1	transcription factor bHLH74-like=Olea europaea var. sylvestris
LOC111401666	-0.901249	-1.86768	1.0965e-06	XP_022885281.1	transcription factor bHLH79-like=Olea europaea var. sylvestris
LOC111372244	-1.57288	-2.97498	8.17857e-15	XP_022850256.1	transcription factor bHLH80-like=Olea europaea var. sylvestris
LOC111401887	-1.47028	-2.77075	1.84385e-11	XP_022885625.1	transcription factor BIM1-like=Olea europaea var. sylvestris
LOC111387638	-3.76556	-13.6002	9.30222e-20	XP_022867982.1	transcription factor CPC-like=Olea europaea var. sylvestris
LOC111372110	-1.8061	-3.49697	1.42632e-35	XP_022850050.1	transcription factor CYCLOIDEA-like=Olea europaea var. sylvestris
LOC111400987	-1.12806	-2.18564	0.00480361	XP_022884261.1	transcription factor CYCLOIDEA-like=Olea europaea var. sylvestris
LOC111383637	-2.34499	-5.08057	4.40849e-09	XP_022863522.1	transcription factor DIVARICATA-like=Olea europaea var. sylvestris
LOC111381608	-1.69601	-3.24004	4.27999e-14	XP_022861176.1	transcription factor DIVARICATA-like=Olea europaea var. sylvestris
LOC111365512	-1.53745	-2.90282	1.29167e-07	XP_022841835.1	transcription factor E2FA-like=Olea europaea var. sylvestris
LOC111394838	-1.34409	-2.53869	3.43722e-07	XP_022876628.1	transcription factor GAMYB=Olea europaea var. sylvestris
LOC111403430	-0.641362	-1.5598	0.00831457	XP_022887700.1	transcription factor GAMYB-like=Olea europaea var. sylvestris
LOC111410316	-2.09281	-4.26579	5.84281e-10	XP_022896352.1	transcription factor HBI1-like=Olea europaea var. sylvestris
LOC111399038	-1.21474	-2.321	0.00107431	XP_022882013.1	transcription factor HBP-1b(c38)-like=Olea europaea var. sylvestris
LOC111399033	-1.76142	-3.39031	1.0317e-07	XP_022882001.1	transcription factor HHO3-like=Olea europaea var. sylvestris
LOC111381388	-1.12227	-2.17689	8.52314e-11	XP_022860939.1	transcription factor HHO5-like=Olea europaea var. sylvestris
LOC111380087	-1.02461	-2.03441	8.79928e-09	XP_022859319.1	transcription factor HY5=Olea europaea var. sylvestris
LOC111387499	-0.496659	-1.41094	0.00642182	XP_022867828.1	transcription factor HY5-like=Olea europaea var. sylvestris
LOC111383288	-2.91231	-7.52821	1.88308e-18	XP_022863135.1	transcription factor IBH1-like 1=Olea europaea var. sylvestris
LOC111368499	-3.94606	-15.4128	2.80858e-37	XP_022845535.1	transcription factor ILR3-like=Olea europaea var. sylvestris
LOC111400689	-0.686403	-1.60927	0.000439272	XP_022883865.1	transcription factor LHW-like=Olea europaea var. sylvestris
LOC111388766	-0.515609	-1.4296	6.57086e-05	XP_022869333.1	transcription factor LHW-like=Olea europaea var. sylvestris
LOC111412265	-0.48639	-1.40094	0.00426162	XP_022898888.1	transcription factor LHW-like=Olea europaea var. sylvestris
LOC111371563	-4.98913	-31.7598	5.50224e-64	XP_022849384.1	transcription factor MYB108-like=Olea europaea var. sylvestris
LOC111376814	-3.05997	-8.33955	1.64142e-14	XP_022855584.1	transcription factor MYB108-like=Olea europaea var. sylvestris
LOC111373107	-2.9369	-7.65765	9.37791e-20	XP_022851356.1	transcription factor MYB108-like=Olea europaea var. sylvestris
LOC111401495	-0.975694	-1.96659	0.000306295	XP_022885010.1	transcription factor MYB114-like=Olea europaea var. sylvestris
LOC111378909	-1.16375	-2.24039	2.97749e-06	XP_022857955.1	transcription factor MYB16-like=Olea europaea var. sylvestris
LOC111368629	-0.629006	-1.5465	0.00633577	XP_022845750.1	transcription factor MYB16-like=Olea europaea var. sylvestris
LOC111383445	-1.81486	-3.51826	5.59387e-09	XP_022863326.1	transcription factor MYB1-like=Olea europaea var. sylvestris
LOC111387946	-1.66741	-3.17643	4.48468e-14	XP_022868347.1	transcription factor MYB1R1-like=Olea europaea var. sylvestris
LOC111398889	-0.563339	-1.47769	0.00228964	XP_022881807.1	transcription factor MYB1R1-like=Olea europaea var. sylvestris
LOC111380429	-0.774651	-1.71078	0.000166874	XP_022859765.1	transcription factor MYB41-like=Olea europaea var. sylvestris
LOC111367212	-1.96543	-3.9053	1.44888e-09	XP_022843735.1	transcription factor MYB44-like=Olea europaea var. sylvestris
LOC111387813	-1.83634	-3.57104	6.65279e-24	XP_022868174.1	transcription factor MYB44-like=Olea europaea var. sylvestris
LOC111393344	-1.92177	-3.78887	3.72807e-07	XP_022874612.1	transcription factor MYB4-like=Olea europaea var. sylvestris
LOC111369339	-2.47891	-5.57478	1.97317e-47	XP_022846587.1	transcription factor MYB62-like=Olea europaea var. sylvestris
LOC111396299	-2.17688	-4.52173	5.8293e-18	XP_022878458.1	transcription factor MYB62-like=Olea europaea var. sylvestris
LOC111399001	-1.25297	-2.38331	1.27779e-08	XP_022881965.1	transcription factor MYB62-like=Olea europaea var. sylvestris
LOC111395856	-1.46589	-2.76233	1.37851e-05	XP_022877822.1	transcription factor MYB63=Olea europaea var. sylvestris
LOC111390480	-4.77629	-27.4035	1.15785e-22	XP_022871296.1	transcription factor MYB8-like= Olea europaea var. sylvestris
LOC111381155	-0.595535	-1.51103	0.00250461	XP_022860669.1	transcription factor MYBS3-like=Olea europaea var. sylvestris
LOC111384602	-0.544397	-1.45841	0.000966472	XP_022864679.1	transcription factor MYBS3-like=Olea europaea var. sylvestris
LOC111386751	-0.507774	-1.42185	0.00960352	XP_022866983.1	transcription factor MYBS3-like=Olea europaea var. sylvestris
LOC111411962	-1.31533	-2.4886	2.36694e-07	XP_022898434.1	transcription factor MYC2-like=Olea europaea var. sylvestris
LOC111367874	-2.80405	-6.98396	1.79848e-24	XP_022844726.1	transcription factor NIGTH1-like=Olea europaea var. sylvestris
LOC111374728	-1.1767	-2.26059	1.10829e-05	XP_022853226.1	transcription factor PCL1-like=Olea europaea var. sylvestris
LOC111393338	-1.47588	-2.78153	4.59626e-10	XP_022874605.1	transcription factor PIF1=Olea europaea var. sylvestris
LOC111410790	-1.61151	-3.05571	8.28391e-34	XP_022897091.1	transcription factor PIF3-like=Olea europaea var. sylvestris
LOC111382213	-0.987476	-1.98271	2.0894e-06	XP_022861908.1	transcription factor PIF3-like=Olea europaea var. sylvestris
LOC111388132	-4.94672	-30.8398	1.72209e-13	XP_022868576.1	transcription factor PRE6-like= Olea europaea var. sylvestris
LOC111404141	-4.69765	-25.9498	1.52154e-48	XP_022888664.1	transcription factor RAX2=Olea europaea var. sylvestris
LOC111372198	-3.96259	-15.5904	1.12034e-29	XP_022850193.1	transcription factor RAX2-like=Olea europaea var. sylvestris
LOC111388591	-0.384574	-1.30547	0.00711583	XP_022869118.1	transcription factor RF2a-like=Olea europaea var. sylvestris
LOC111382513	-2.20786	-4.61989	2.3109e-25	XP_022862284.1	transcription factor SRM1-like=Olea europaea var. sylvestris
LOC111400926	-2.01252	-4.03485	2.9683e-13	XP_022884165.1	transcription factor TCP13-like=Olea europaea var. sylvestris
LOC111368040	-1.75622	-3.37812	4.87723e-07	XP_022844972.1	transcription factor TCP14-like=Olea europaea var. sylvestris
LOC111395589	-3.12164	-8.70376	2.09708e-12	XP_022877412.1	transcription factor TCP15-like=Olea europaea var. sylvestris
LOC111388122	-0.882936	-1.84412	0.000793219	XP_022868564.1	transcription factor TCP15-like=Olea europaea var. sylvestris
LOC111365409	-1.07436	-2.10578	0.000800295	XP_022841701.1	transcription factor TCP20=Olea europaea var. sylvestris
LOC111403405	-0.647272	-1.5662	0.000110613	XP_022887673.1	transcription factor TCP20-like=Olea europaea var. sylvestris
LOC111394876	-1.49948	-2.8274	3.01412e-10	XP_022876695.1	transcription factor TCP23-like=Olea europaea var. sylvestris
LOC111407260	-1.39242	-2.62519	1.7551e-09	XP_022892409.1	transcription factor TCP2-like=Olea europaea var. sylvestris
LOC111382932	-1.51564	-2.85926	2.17202e-06	XP_022862742.1	transcription factor TCP4-like=Olea europaea var. sylvestris
LOC111410222	-0.797828	-1.73848	0.000248396	XP_022896243.1	transcription factor TCP9-like=Olea europaea var. sylvestris
LOC111396734	-0.5734	-1.48803	0.00898393	XP_022878990.1	transcription factor TGA3-like=Olea europaea var. sylvestris
LOC111408903	-2.57806	-5.97135	1.38939e-10	XP_022894518.1	transcription factor TGA7-like=Olea europaea var. sylvestris
LOC111409880	-4.57933	-23.9066	1.4045e-35	XP_022895741.1	transcription factor UNE10-like=Olea europaea var. sylvestris
LOC111376049	-0.749155	-1.68081	0.00318798	XP_022854744.1	transcription factor UNE12-like=Olea europaea var. sylvestris
LOC111411839	-0.457905	-1.37355	0.00495056	XP_022898240.1	transcription factor UNE12-like=Olea europaea var. sylvestris
LOC111372750	-0.457443	-1.37311	0.0006132	XP_022850916.1	transcription factor VOZ1=Olea europaea var. sylvestris
LOC111402064	-1.05088	-2.07179	6.56223e-11	XP_022885876.1	trihelix transcription factor GT-2-like=Olea europaea var. sylvestris
LOC111403309	-4.06743	-16.7656	2.34983e-14	XP_022887526.1	truncated transcription factor CAULIFLOWER A-like= Olea europaea var. sylvestris
LOC111396223	-4.04544	-16.512	8.35877e-50	XP_022878350.1	truncated transcription factor CAULIFLOWER A-like=Olea europaea var. sylvestris
LOC111387581	-1.77871	-3.43119	4.04111e-16	XP_022867926.1	uncharacterized protein At3g50808-like=Olea europaea var. sylvestris
LOC111404734	-1.1176	-2.16986	3.55418e-06	XP_022889267.1	WRKY transcription factor 44-like=Olea europaea var. sylvestris
LOC111384954	-3.65589	-12.6047	1.02736e-13	XP_022865070.1	WRKY transcription factor 6-like= Olea europaea var. sylvestris
LOC111389364	-2.69605	-6.48025	2.44434e-23	XP_022870055.1	WRKY transcription factor 6-like=Olea europaea var. sylvestris
LOC111395945	-0.793814	-1.73365	0.000694543	XP_022877948.1	WRKY transcription factor 6-like=Olea europaea var. sylvestris
